# Supplementary material for: CFTR Rescue by Lumacaftor (VX-809) Induces an Extensive Reorganization of Mitochondria in the Cystic Fibrosis Bronchial Epithelium
Source: Cells. 2022 Jun 16;11(12):1938. doi: 10.3390/cells11121938 (PMC9222197; doi:10.3390/cells11121938)
Supplement: Supplementary file 1 [file cells-11-01938-s001.zip]

Archive with 8 entries (8 files):
- Supplementary Figures_Revised.pdf
- Supplementary File 1.xlsx
- Supplementary File_2.xlsx
- Supplementary File_2a.xlsx
- Supplementary File_2b.xlsx
- Supplementary File_2c.xlsx
- Supplementary File_3.xlsx
- Supplementary File_4.xlsx
