# Supplementary material for: CFTR Rescue by Lumacaftor (VX-809) Induces an Extensive Reorganization of Mitochondria in the Cystic Fibrosis Bronchial Epithelium
Source: Cells. 2022 Jun 16;11(12):1938. doi: 10.3390/cells11121938 (PMC9222197; doi:10.3390/cells11121938)
Supplement: Supplementary file 1 [file cells-11-01938-s001.zip › Supplementary File 1.xlsx]

## Sheet: Supplementary File 1
Uniprot accession number	DMSO					QC					VX-809
	DMSO_Rep1	DMSO_Rep2	DMSO_Rep3	DMSO_Rep4	DMSO_Rep5	QC_Rep1	QC_Rep2	QC_Rep3	QC_Rep4	QC_Rep5	VX809_Rep1	VX809_Rep2	VX809_Rep3	VX809_Rep4	VX809_Rep5
Q96JP5	-0.0247917	0.00872498	-0.046404	-0.0491026	0.0129082	0.058731	0.00281698	0.0275188	0.046707	0.0424098	-0.00632304	-0.0407995	-0.0895808	-0.0196734	0.0768582
P36578	0.250967	0.25408	0.612518	-0.852859	0.086039	0.166642	-0.0672798	0.0285712	0.0120253	-0.0811333	0.355143	-0.781023	-0.371435	0.235264	0.152481
Q92945	0.34108	-0.0619558	0.105714	-0.605733	-0.27532	0.108843	0.011829	-0.00406771	-0.0965627	-0.075642	0.470994	-0.102326	-0.102758	0.230249	0.0556556
Q6SPF0	0.0439599	0.0156766	-0.026928	-0.033165	-0.0808515	0.0353638	0.0789177	-0.0271183	0.0204189	0.0329239	-0.0634477	-7.27604e-05	0.00408427	-0.067254	0.0674921
O76031	-0.0242292	-0.198977	0.210894	0.184761	-0.0850755	-0.0569536	0.0425442	-0.0822839	-0.05517	-0.0822649	0.129763	0.144637	0.108677	-0.251952	0.0156295
Q9BTD8	-0.00364572	0.168417	-0.0238713	-0.286554	-0.080928	0.0311224	-0.240949	-0.150847	-0.2053	0.0501774	0.290153	0.227129	0.272645	-0.126321	0.0787736
Q9P258	0.0621814	0.398985	-0.093426	-0.240076	0.216838	-0.0240397	0.0774772	0.228828	-0.161442	0.0182412	-0.225775	-0.169704	-0.149454	0.412787	-0.351422
Q9H3U1	-0.137062	0.322233	0.0168689	-0.282596	0.0980368	-0.0613249	-0.0830601	-0.0193916	-0.0362702	0.0855478	-0.0781289	0.112014	0.0373843	-0.056544	0.0822932
O60518	0.0333636	0.0668481	-0.0583867	-0.140793	0.00981981	0.00476362	-0.00518575	-0.0368272	-0.0149173	-0.0201256	0.0352154	-0.0188339	0.0777186	0.0415229	0.0258176
Q9Y2U8	0.0846714	0.0705908	-0.0370253	-0.0763426	0.0398512	0.0653695	0.0637109	-0.22996	0.0447857	-0.0549131	-0.0184955	0.0926332	0.0298905	-0.0183966	-0.0563699
Q9UPT8	0.162006	-0.0663047	-0.00459567	0.00840849	-0.0349436	0.0272328	0.0142433	0.00665078	-0.00439983	0.0652872	0.0103733	-0.133585	-0.0209466	0.0385262	-0.0679528
Q96L91	0.0302984	0.033267	-0.0406308	0.0213723	-0.00665492	-0.00957286	-0.00414543	-0.0279658	-0.00989414	0.0243716	-0.111036	0.071431	0.0539671	-0.0267932	0.00198537
P52701	0.514797	0.16741	0.0979759	-0.615018	0.205629	-0.178267	0.0100594	0.109322	-0.123033	0.0855378	-0.339791	0.102664	-0.0523558	-0.00352704	0.0185966
Q9NRL3	0.046162	0.173023	-0.032685	-0.0862368	0.0517273	0.100343	-0.00341888	0.0270562	0.0274662	0.0463615	-0.136001	-0.0994179	-0.217645	0.0476216	0.0556433
Q96D53	0.0315187	-0.00354526	-0.0118829	0.0866743	-0.0604831	-0.00410455	-0.0650696	-0.0985412	-0.0222083	-0.0502854	0.059392	0.000738151	0.0644143	0.0356489	0.0377341
Q6P2E9	0.25034	0.00906764	0.258691	-0.134038	-0.0360828	-0.00625662	-0.127054	-0.0884891	0.0553238	-0.0778999	0.0421307	-0.188414	-0.0950801	0.151611	-0.0138484
Q9NQP4	0.0865705	0.165288	0.0154664	-0.0629246	-0.0804462	0.0191948	0.0519348	-0.00469296	0.0186272	9.1858e-05	-0.00179728	-0.0895702	-0.0279866	-0.028774	-0.0609816
Q96P70	0.0546914	0.155297	-0.0601474	-0.123594	0.127851	0.00663075	-0.102152	-0.0111509	-0.0356806	0.0706172	-0.100475	0.103676	-0.122851	0.0703381	-0.0330519
P21953	0.0731525	9.6671e-06	-0.119745	0.210395	-0.0450113	0.0633243	-0.0584762	-0.0308685	-0.0789842	-0.00823811	-0.19519	0.0624359	0.161208	-0.00851559	-0.025496
P30260	-0.140993	-0.01861	0.0122129	-0.0458291	-0.0354793	-0.0115999	-0.0220548	0.0597619	0.0812793	0.113401	0.0501964	0.0256007	-0.0556151	0.0542109	-0.0664813
O15042	-0.085171	-0.262378	-0.0089645	0.12382	-0.0787494	-0.0677799	-0.0615369	-0.0863017	0.106034	0.0256345	0.182047	0.0371417	0.226504	0.0462971	-0.0965965
Q01780	0.202699	-0.194092	-0.0602551	-0.123741	-0.0696292	-0.0102125	0.0142412	-0.0285409	0.149602	-0.0673852	0.128942	0.208459	0.114444	-0.061676	-0.202855
P02786	-0.105602	-0.795162	0.32171	0.240538	-0.46829	-0.00362028	0.0385309	0.0585623	0.078317	-0.0140777	0.685412	0.464206	0.233103	-0.487494	-0.246134
P07954	0.173363	-0.358348	-0.512183	0.449146	-0.150273	0.0316911	-0.190471	0.0739732	0.0902671	0.34706	-0.138479	0.228188	0.0859521	-0.0745194	-0.0553666
Q9Y490	0.00633342	0.277139	-0.18062	0.313961	0.425877	-0.273579	0.121655	-0.153328	-0.127473	0.00570529	-0.196428	-0.359168	-0.442301	0.635778	-0.0535518
O94826	0.000637126	-0.341145	0.130158	0.115077	-0.0264441	-0.20964	-0.0591169	0.0361548	0.0491007	-0.08428	0.406911	0.0987475	0.0023211	-0.21725	0.098769
Q9H9Y2	-0.0115826	-0.0465268	-0.0104536	0.0571695	0.00649803	0.0339004	-0.0116041	-0.0241311	-0.0097065	0.0391333	0.0144206	0.0431099	0.0551695	-0.140829	0.00543216
Q16555	0.227171	0.232514	-0.112113	-0.0884261	0.157298	0.0174076	-0.0680065	0.0452333	-0.175479	0.0304644	-0.226234	-0.0886046	-0.0625355	0.146686	-0.0353758
Q96S52	0.231222	-0.105567	0.0205829	0.143145	-0.111836	-0.0461019	-0.0979698	-0.0104649	-0.0553355	-0.0879961	0.0109567	0.0802226	-0.0127384	0.04952	-0.00763941
P23381	-0.0226757	0.246205	0.0318985	-0.0927087	0.205928	-0.0558866	-0.0605167	0.0674986	-0.077805	-0.081761	-0.123523	-0.0809077	0.0180166	0.083568	-0.0573308
P35221	0.20369	-0.56424	-0.252143	-0.00742765	-0.0237644	-0.188091	-0.164813	-0.104063	-0.265932	-0.0575303	0.129465	0.390831	0.28289	0.138452	0.482676
Q96C19	-0.0432836	0.055707	-0.136685	0.00319732	0.00663466	0.0556793	-0.00433638	0.115512	0.119637	-0.0599563	-0.207733	-0.0041613	0.0227416	0.0902741	-0.0132278
Q8WVQ1	-0.0786441	0.0349772	-0.0542563	-0.06301	-0.0696999	-0.0170471	0.0802871	-0.0144496	0.0269795	0.146042	0.11643	-0.0468316	-0.0373352	0.00505899	-0.0285012
Q15149	0.351964	-0.629855	0.164727	-0.0321599	0.243713	-0.309753	-0.340506	-0.386162	-0.346278	-0.103617	0.753961	0.719227	0.0124178	-0.514694	0.417015
O14497	-0.0654184	-0.0896935	0.0592054	0.117119	-0.0574935	0.0106116	0.0026336	0.0362506	-0.0646295	0.0343783	-0.0237167	0.055889	0.00374649	-0.0202679	0.00138557
Q9BQS8	-0.170379	0.082626	-0.051394	-0.148495	0.0442812	0.0951669	-0.0368389	0.0925613	-0.00936132	0.0965077	-0.124292	0.0721337	0.0505963	-0.0564038	0.0632911
P58107	-0.141823	-0.131464	-0.135449	-0.0861829	0.56801	-0.0477694	-0.178598	-0.0488196	-0.106564	-0.0543996	-0.0765654	-0.185415	0.0597469	-0.225473	0.790766
P13807	0.0369486	0.189118	0.139442	-0.0954757	0.0703503	-0.0380117	-0.148442	-0.0723795	-0.0813855	-0.0685861	-0.0993997	0.102928	0.0955658	0.110061	-0.140733
P51970	-0.148332	-0.23243	0.0435672	0.182286	-0.204177	0.0348797	0.0165571	0.0422296	0.056806	0.0414594	0.114964	0.0806966	0.073468	-0.13665	0.0346758
P08107	-0.0567946	0.235873	0.104842	-0.192654	0.298171	-0.0458518	0.0321502	-0.0262532	-0.122897	0.0230738	0.244779	-0.406106	-0.258789	0.414107	-0.24365
Q8TAE8	-0.198143	-0.124159	0.0793929	0.160355	0.05376	0.148279	0.181035	-0.147874	-0.140975	-0.049349	0.0530901	0.126643	0.0564456	-0.344566	0.146065
Q14008	0.0480943	0.0277529	0.022697	-0.184012	0.0826675	-0.162886	0.0457275	0.038483	-0.0989109	-0.140074	0.0604404	-0.145754	0.0497826	0.250664	0.105327
P31948	0.0217061	0.204866	0.332802	-0.653339	0.11137	0.278737	-0.198336	0.0668335	0.29634	0.00426951	0.0113521	-0.320448	-0.414288	0.363661	-0.105526
Q92574	-0.093334	-0.1387	0.0548067	0.0829603	0.0865131	0.0107974	0.014883	0.031454	0.0309043	-0.0284885	-0.0647445	-0.0565013	0.0393173	-0.0622269	0.0923587
Q13423	-0.232986	-0.391501	-0.265205	0.306021	-0.129002	-0.0624153	0.0862866	0.197693	0.204872	0.049393	-0.139455	0.203113	0.242202	0.00536909	-0.0743847
Q14203	-0.00237864	0.162143	0.0201812	-0.335967	0.0643662	0.120568	0.121166	-0.131454	-0.176506	0.00548177	0.104123	0.0293573	-0.0457756	0.147671	-0.082976
P0DMV9	0.552185	0.15642	0.32799	-0.135619	0.13413	-0.429558	-0.408007	-0.13406	-0.0986542	0.293819	0.0639918	-0.223598	-0.123073	0.268031	-0.243998
Q8WZA9	-0.0298444	0.0160861	-0.0759962	-0.0809801	0.0136668	-0.0464344	0.0123206	0.122557	0.100954	-0.0491457	-0.102457	0.0661849	-0.0315902	0.159674	-0.0749964
O60716	0.322802	-0.719459	0.051581	-0.0585684	-0.00316592	-0.101058	-0.226403	-0.462941	-0.157893	-0.0429648	0.414469	0.475339	0.204146	-0.003377	0.307492
Q14498	-0.0888292	-0.325086	0.115846	0.388121	-0.14987	0.0331858	-0.170209	-0.0546529	-0.0301438	0.00435976	0.410922	-0.071277	0.0587634	-0.127984	0.00685455
Q15042	0.0662696	-0.0652771	0.00299549	-0.0497496	0.0165505	-0.0515541	-0.00256245	0.0836552	-0.030893	0.07484	-0.159764	-0.0186232	-0.0765506	0.0705154	0.140148
Q9NX63	-0.207575	-0.326059	-0.00225038	0.325349	-0.172991	0.131984	-0.0276095	0.150453	0.158217	0.0666514	0.165787	-0.102741	-0.152736	-0.0529086	0.046429
A5YKK6	0.141514	0.171924	0.0826268	-0.153608	0.114947	-0.260416	-0.0997685	-0.0157925	0.154211	-0.152593	-0.0369523	-0.0786763	-0.158568	0.376076	-0.084924
P26641	0.426708	1.09093	0.60254	-0.78918	0.130014	-0.253285	-0.185905	-0.164583	-0.164469	-0.134715	0.137896	-0.727463	-0.394818	0.542498	-0.116172
P20810	-0.036591	0.408688	-0.0879588	-0.236183	0.142639	0.00947422	-0.0198301	0.0267684	0.0151873	0.0947449	-0.267752	-0.142243	-0.0837311	0.259214	-0.082427
P31350	-0.00230981	0.286322	-0.0834695	-0.312071	0.219638	0.0114018	-0.0956868	0.0536034	-0.0752492	0.0695454	-0.103321	0.00128272	-0.00663133	0.0276037	0.00934146
Q16643	-0.36523	-0.315747	0.135348	0.406574	0.0639779	-0.0990725	0.00658384	-0.0461792	0.0559619	0.0216466	0.168283	-0.0248491	0.0350661	-0.16351	0.121147
P53618	0.272464	0.537594	0.00631765	-0.460043	0.255953	-0.119095	-0.0384496	-0.0925818	-0.0746616	0.00189773	-0.145929	-0.0416578	-0.0327747	0.0973253	-0.166359
Q9NVA2	-0.0198684	0.220665	0.0520728	-0.0391396	0.0515096	0.0062144	0.0613667	-0.135239	0.0477927	0.0256064	-0.162428	-0.183092	-0.171323	0.262336	-0.0164734
Q9H2M9	-0.029374	0.151505	-0.0761133	-0.0729478	-0.0399697	0.0437634	-0.102065	0.0445197	0.103438	0.0517595	-0.140555	0.0773893	-0.0462056	0.0462227	-0.0113676
Q7Z5L9	-0.0136731	0.0128654	0.0795963	-0.107176	-0.0283417	0.0833791	0.0588746	-0.0295172	-0.087289	0.0723404	0.0144003	0.0348388	-0.0817049	0.0311592	-0.0397526
P30305	0.0124092	0.0104313	-0.055386	-0.418245	0.0628919	0.109795	0.00551262	0.0520194	-0.0408016	0.0816734	-0.044901	0.0997865	0.1	-0.0143066	0.0391208
P08559	-0.129795	-0.317546	-0.0738284	0.315065	-0.0821123	0.0474738	-0.123283	0.0673809	0.15415	0.0811792	-0.0843557	0.195782	0.0394391	-0.14024	0.0506916
Q10570	-0.0339861	-0.106247	-0.138759	0.397029	-0.15181	0.102862	-0.00158413	0.0581116	-0.0365796	-0.030071	-0.0681327	0.0163997	0.128085	-0.00816337	-0.127155
Q99733	0.0181639	0.169965	0.153963	-0.294669	0.328382	-0.0673438	-0.0166078	-0.0610895	0.0259737	-0.0556432	-0.0236666	-0.175301	-0.0151601	0.0681986	-0.0551652
Q96RP9	-0.153724	-0.402091	0.0545185	0.229622	-0.216733	-0.00907549	0.0763414	-0.0263762	0.0119693	-0.097292	0.47544	0.232613	0.122285	-0.371123	0.0736259
Q8N1S5	0.00633238	-0.0172887	-0.0101696	-0.0119715	0.0183447	0.030267	0.0159132	0.013434	0.0219769	0.0506673	-0.0505748	0.02925	-0.0430469	-0.0767294	0.0235955
Q9NVC6	0.0315903	0.124677	0.0306729	-0.020602	-0.139497	-0.082947	-0.0396434	0.0727053	-0.0884202	-0.0507902	0.0460981	-0.0234004	0.0937152	-0.0208658	0.0667072
Q9UDW1	-0.05748	-0.124953	0.018347	0.223519	-0.0827198	-0.0240324	0.0309732	-0.00853902	-0.00917085	0.0824537	0.0485541	0.0866532	-0.00480826	-0.0865801	-0.0922178
P49006	-0.0817897	-0.0635434	-0.0184681	0.160372	0.121709	-0.00141338	-0.00287581	0.0659319	0.191733	-0.0455166	-0.176851	-0.174208	-0.125794	0.139776	0.0109392
Q7KZF4	-0.0694347	0.177137	0.269844	-0.167426	0.506446	-0.0793644	-0.131609	-0.187796	-0.288434	0.0570947	0.22014	-0.151365	-0.0653018	-0.0143251	-0.0756052
P18206	-0.129325	0.49913	-0.0497439	-0.376398	0.508061	0.082123	-0.0807855	-0.038425	0.0475881	0.169297	-0.318601	-0.393966	-0.170665	0.099451	0.152259
P19404	-0.121021	-0.136441	-0.0217654	0.156382	-0.100196	-0.0287445	-0.0031518	0.0485637	-0.229205	0.0229998	0.306462	0.0530147	0.114935	-0.0383863	-0.0234469
O43837	-0.220986	-0.0956754	0.092395	0.169408	-0.148345	0.115334	-0.0389549	-0.0219254	-0.139081	0.0974287	0.260308	-0.0185643	0.125816	-0.120593	-0.0565647
Q8N201	-0.000848141	-0.0556483	0.0563687	-0.00347588	-0.0117201	-0.039641	0.0481948	0.0376627	0.00927582	-0.0586179	-0.00948186	0.0412639	0.00249473	0.169777	-0.185605
Q9UBF2	0.0335533	-0.277645	0.148909	-0.0182672	0.212278	0.137766	0.114951	0.136791	0.12234	0.0746543	-0.305348	-0.094669	-0.0610027	-0.311563	0.0872525
O00468	-0.0247594	-0.296513	-0.141694	-0.138382	-0.0400536	0.119263	-0.0344463	-0.0959605	-0.0375817	0.0524459	0.0543825	0.248282	0.129028	0.0310195	0.174969
P13995	-0.165	-0.260666	0.024144	0.011734	-0.20881	0.109511	0.0160024	0.0158876	-0.00662073	0.0860477	0.388259	0.151099	0.17734	-0.282101	-0.0568267
P49585	-0.0485832	0.142181	0.0184623	-0.0884255	0.0677651	0.0221535	0.0603724	0.0400231	0.00513148	0.000933764	-0.0330083	-0.161808	-0.0672615	0.0380623	0.00400096
P17858	0.0574867	0.146092	0.0789977	-0.207731	0.116212	-0.0135528	0.00315755	-0.128421	0.138586	-0.0655568	-0.0573955	-0.171844	-0.138565	0.211426	0.0311084
Q9H7E9	0.0284986	0.0428323	-0.0104574	-0.0166647	0.0440652	0.0589328	0.0133809	-0.0643165	0.0276138	0.0314244	-0.0407364	-0.136826	-0.0114525	0.030627	0.00307878
O95336	0.122059	0.229512	-0.11425	-0.180648	0.137838	-0.0243386	0.0461515	-0.0815882	0.0742621	-0.0680845	-0.323265	0.0825389	-0.0198558	0.110898	0.00876983
P55060	0.15875	0.429254	0.360983	-1.15186	0.66839	0.0317782	0.150396	0.103832	0.12011	-0.227375	-0.214188	-0.412012	-0.420201	0.467154	-0.0650098
O15269	-0.0818821	-0.417044	-0.126669	0.13104	-0.0771441	-0.0446095	0.0878529	0.0476415	0.0470522	0.0318422	-0.0144637	0.0935667	0.057571	0.123956	0.14129
O95235	0.0192616	0.00984282	-0.00185379	-0.000459602	-0.0418006	-0.0168322	0.0210058	-0.0228299	0.0338457	0.00441501	0.0382513	-0.0630198	0.017255	-0.00675297	0.00967154
Q8TDX7	-0.0256817	0.123213	0.026989	-0.140153	0.200855	0.000646311	-0.0499742	0.0115254	0.0303577	-0.0630303	-0.0273425	-0.0795632	-0.0564969	0.0501337	-0.00147763
P02768	-0.533949	-0.622216	-0.41091	-0.441647	5.87743	-0.269597	-0.267064	-0.288909	-0.301687	-0.314498	-0.46273	-0.499091	-0.386842	-0.638102	-0.440188
Q01813	-0.141047	0.416806	0.0594597	-0.502379	0.379819	0.0130441	-0.00505683	0.0618022	-0.0561469	0.0762874	-0.0663939	-0.105259	-0.190928	0.0609473	-0.000954813
Q99575	0.121316	0.0118846	-0.0092342	-0.166566	-0.122941	0.0809802	0.0586182	-0.00133916	-0.00937511	-0.0394517	0.169158	0.068857	-0.0797252	-0.0544346	-0.0277459
Q53H12	-0.0430017	-0.235964	-0.0489996	0.164474	-0.116126	-0.00857952	-0.115819	-0.157738	0.0978881	-0.00212297	0.2324	0.240086	0.103718	-0.121831	0.0116166
Q9UGR2	-0.0576431	0.00869812	0.0318016	-0.0510899	0.0130358	-0.0388809	0.0074827	0.0196099	-0.0339687	0.0155875	0.0542443	-0.0167688	0.00527065	0.0266164	0.0160044
P06753	0.110083	0.420223	0.0876018	-0.120668	0.0295327	-0.081042	-0.032557	-0.0878174	-0.0337816	-0.0483227	-0.354325	-0.0356912	0.036185	0.337219	-0.22664
Q14980	0.204103	-0.304661	-0.476897	0.255797	0.24069	-0.0701826	0.0108145	0.0336126	-0.0291339	-0.168254	-0.411284	-0.290886	-0.101626	0.449005	0.658902
Q9UNF0	-0.071663	0.243249	0.053246	-0.0858232	0.216917	-0.0332568	-0.253945	0.0424505	-0.0211282	-0.0582549	0.0195187	-0.260716	0.029607	0.198208	-0.0184102
Q9UBQ7	0.0279472	0.203914	-0.215422	0.132418	0.110421	-0.060381	0.0217144	-0.0454984	-0.210801	-0.0126403	-0.0742532	0.118727	0.0558349	0.0175799	-0.0695609
P43304	0.13976	-0.167898	-0.287069	0.16494	-0.0615022	-0.0486303	-0.0305391	-0.0352415	-0.0737351	-0.0932027	-0.0254445	0.178579	0.359753	0.00385462	-0.0236225
Q13586	0.00854897	-0.16715	-0.116501	0.248381	-0.0308151	-0.101327	-0.0721245	0.00686067	0.0664206	-0.12912	0.0150372	0.113944	0.0761696	0.101475	-0.0198015
Q9NXH9	0.00198536	0.125932	0.0544393	-0.112918	-0.0526617	-0.0263612	0.0280201	0.0279428	-0.00221219	-0.0308446	-0.00701489	-0.136692	-0.0825654	0.128944	0.0840069
P49916	0.021946	0.00993747	0.103865	-0.0536319	0.0584185	0.0581077	0.00901318	-0.0885398	-0.0373053	0.0311917	-0.0401775	-0.0446486	0.12982	-0.0172807	-0.140715
Q6P1J9	0.0153389	-0.191073	0.13507	0.232339	-0.0302525	-0.0552884	0.0968315	-0.0885254	-0.0769349	-0.11113	0.0642337	-0.022869	0.043164	-0.0214061	0.0105022
P51452	-0.0103853	0.066551	-0.0167752	0.0232034	0.0129105	0.0222275	-0.00500651	0.0139002	0.00619564	0.0320325	-0.0184468	0.0161725	-0.0697723	0.0147205	-0.0875275
Q9Y277	-0.16594	-0.348188	0.0778271	0.35481	-0.0171117	-0.0783394	-0.0229974	-0.0282985	-0.0300605	-0.0141771	0.222043	0.344448	-0.00705004	-0.156555	-0.130409
O43395	-0.0744334	-0.223904	0.112603	0.10663	-0.0489857	0.0200119	-0.0143133	-0.0810495	0.098889	0.111413	0.0374183	0.0150095	-0.0910185	0.0012931	0.0304363
Q86VP6	0.235993	0.478113	-0.0230157	-0.615512	0.193289	0.0291879	0.000957828	0.0682148	0.0496263	-0.037373	-0.142578	-0.200897	-0.10475	0.268679	-0.199936
P98194	0.0214872	0.0316651	0.000656262	-0.0169058	0.0745633	-0.0108106	-0.0262001	-0.0131955	-0.0616269	0.00399489	0.0178584	-0.0474222	0.0034433	-0.0790586	0.101551
Q96ST3	0.297527	-0.14749	-0.15199	0.174222	-0.119705	-0.0735298	-0.0857249	-0.113809	-0.108831	-0.0615621	-0.221564	0.277324	-0.0979193	0.144239	0.288813
Q12888	0.106602	-0.306483	-0.0164461	0.255921	-0.174077	-0.106452	0.0326874	0.12466	0.11857	-0.114583	-0.115374	-0.134559	0.0670049	0.170649	0.0918791
Q8NBX0	-0.145524	-0.230296	-0.0089124	-0.0591347	-0.00290936	0.0644311	-0.107717	-0.0449031	-0.0690294	0.139657	0.0517297	0.263265	0.159938	-0.113108	0.102515
Q13573	0.130743	0.0631387	-0.0700649	0.0755854	-0.0572464	0.0831362	0.0801681	-0.320292	0.0179114	-0.0415093	0.0656422	0.0759955	-0.182809	-0.0679665	0.147568
Q96FQ6	-0.0909051	4.2211e-05	0.0275638	0.00175801	0.0200265	0.0376989	0.0942792	0.0294307	0.0936018	-0.0297552	-0.0497162	-0.151672	-0.125677	0.17675	-0.0334245
Q9H0R6	0.045238	-0.0292156	0.0256089	0.0123179	-0.00942977	0.00804832	-0.115476	0.0197155	-0.03617	-0.0412523	0.0392265	0.0854323	-0.0100062	0.0771077	-0.0711451
O60701	0.0825031	0.161852	0.0710072	-0.163271	0.0607436	0.0732111	-0.105085	0.0855287	0.00194444	0.0755172	-0.102041	-0.193886	-0.0616066	0.0483658	-0.0347832
Q8NFC6	0.0242853	-0.116565	-0.0458966	0.00527372	-0.107534	0.0457865	0.190763	0.00531375	0.150096	-0.0198486	-0.0925018	-0.107478	0.00127021	0.103768	-0.0367325
P78362	-0.0987254	-0.0306204	-0.016265	-0.0678614	-0.00147343	-0.0491396	-0.0169168	-0.0109966	-0.00859132	0.0166971	-0.00996666	0.0227589	-0.0791043	0.365401	-0.0151958
O95782	-0.0743006	0.0920176	-0.378078	-0.123104	0.121459	-0.335029	-0.107111	-0.26054	0.282817	0.303126	0.0223641	0.169936	0.155465	-0.210324	0.341302
Q15293	-0.173025	-0.336839	-0.133595	0.563889	-0.210192	0.115372	0.0536633	0.0499258	0.121953	0.0918812	-0.0242106	0.165026	0.0049759	-0.0749715	-0.213852
O15382	-0.035203	-0.290049	0.0191433	0.457657	-0.105587	-0.0186702	-0.0612651	-0.0791714	-0.128426	-0.00760791	-0.202429	0.311999	0.247913	-0.0311743	-0.07713
Q9UBV2	-0.0172691	-0.0943765	-0.201017	-0.00182421	-0.0242661	-0.0132372	-0.0491211	0.101156	-0.0370761	0.112225	-0.0172429	-0.032703	0.269417	0.00668578	-0.00135081
P30038	-0.149832	-0.0340032	-0.0675564	0.188108	-0.1176	-0.00346447	0.0187708	0.0907579	0.0413827	-0.0282907	0.0257268	-0.0105117	0.141194	-0.136927	0.0422442
Q8IVT2	0.0156376	-0.0745492	0.0103022	-0.0173927	0.0958822	0.0696166	-0.043039	0.0473634	0.0643175	-0.0794423	0.190496	-0.20109	-0.164742	-0.0797506	0.166391
P67809	-0.343236	-0.0688737	0.144021	-0.242218	0.254205	0.129317	0.0987312	0.106563	0.126173	0.0660691	0.0564326	-0.398843	-0.160814	0.169629	0.0628444
O15294	-0.0443489	-0.120851	-0.00570981	-0.240555	0.0620086	-0.16283	0.171168	0.118967	0.0846756	0.0961759	-0.0515797	0.106373	-0.0812651	0.118746	-0.0509736
Q96GM8	0.053478	-0.0422011	0.107903	-0.00654182	0.0119318	-0.0466862	-0.0733247	-0.0422029	0.002899	-0.00722005	0.0451859	0.0392206	-0.0493035	0.00952111	-0.00265914
P35251	0.149595	-0.0910273	-0.0657409	-0.0674515	-0.0704975	-0.159605	-0.00758098	0.00151895	-0.082735	0.00942663	0.106346	0.0616937	0.0833666	0.0629146	0.0697764
Q1ED39	-0.057558	-0.0664593	0.170645	0.0263063	-0.0562303	0.0235089	0.0342131	0.0171296	-0.0151474	0.00973608	0.0107867	-0.081606	0.0357032	-0.0396053	-0.0114221
P12270	0.244289	-0.526066	0.0502997	-0.104945	0.0582496	0.0994228	0.0469728	-0.25555	-0.202442	-0.163699	0.0784546	0.0410417	0.020087	0.271286	0.342598
P31327	0.0101719	-0.0982613	-0.0764651	0.0351868	0.0128857	-0.040312	0.00324044	-0.0217549	-0.0482456	-0.00103303	-0.0122338	-0.0746673	0.256649	0.00147428	0.0533647
Q92616	0.159573	0.579867	0.0261126	-0.214312	0.248278	-0.180245	-0.00313235	-0.143047	0.0473719	-0.240722	-0.0853963	-0.074036	-0.279579	0.256088	-0.0968217
Q9Y2T2	-0.0456775	0.239406	0.0276457	-0.0669662	-0.0100833	0.0457073	0.0429746	-0.0240425	0.0323469	-0.00352994	-0.0920282	0.00460187	-0.0664989	0.0857739	-0.16963
Q9NU22	-0.143659	-0.0192713	0.159221	-0.157015	-0.0341995	0.0522389	-0.090546	-0.168017	0.127468	0.0852626	0.135386	0.0621656	0.156813	-0.139061	-0.026788
O75569	0.174213	0.140302	-0.0310163	-0.0531543	-0.0710106	-0.0204523	-0.0335598	0.0306016	-0.0801191	0.034922	0.0227007	-0.126195	0.00605218	0.0477274	-0.0410116
Q8N163	0.233911	-0.258202	0.0467251	0.579806	-0.128683	-0.156463	-0.226153	-0.122284	-0.0326962	-0.201814	0.214547	0.190294	-0.118008	-0.056813	0.0358342
P35240	-0.0200992	-0.0883192	0.0451263	0.062992	0.0115286	-0.0343004	-0.111693	0.00658142	-0.0433173	-0.0500203	0.0849124	0.103663	0.0103483	-0.0168533	0.0394511
Q8IZ83	-0.0851973	0.169743	0.085014	-0.093427	0.059338	-0.0595538	-0.0597321	0.0306381	-0.0421627	-0.0359537	-0.163844	0.0474539	-0.121236	0.241981	0.0269377
Q9H6S3	0.0728056	0.366155	-0.173559	-0.237368	0.275214	-0.0485958	0.0318776	0.030121	-0.0202361	-0.049955	-0.216347	-0.218982	-0.1804	0.252891	0.116379
Q14692	-0.0873618	-0.0611347	-0.00088916	0.0772291	-0.133137	0.0346096	-0.0620567	-0.0564104	-0.0660881	0.0163666	0.0453584	0.262386	0.131943	-0.117274	0.0164584
Q12929	0.006547	0.200069	0.0932213	-0.0748579	-0.0509103	-0.122502	-0.0252149	-0.0185043	0.135992	-0.136466	-0.016249	0.0454038	0.0526017	-0.112624	0.0234924
P55263	0.0314179	0.207617	0.0439815	-0.191746	0.20285	0.0072484	0.0383584	-0.00730223	-0.0104656	-0.138956	-0.144674	-0.0926762	-0.0192775	0.185704	-0.11208
Q14554	0.0479745	-0.0186674	-0.042266	0.219986	-0.0744215	0.0281438	-0.170899	-0.00337696	-0.00145522	-0.00323087	-0.151383	0.132942	0.0933469	-0.0163249	-0.0403685
Q08211	-0.233006	-1.23485	-0.104872	0.404766	-0.329797	-0.0880596	-0.0730572	-0.0472624	-0.062191	-0.0542117	0.559359	0.828164	0.413637	-0.344978	0.366362
P06454	-0.229584	0.0067826	0.134357	-0.092306	0.237671	0.138105	0.223911	0.209073	0.225155	-0.0892796	-0.266715	-0.30145	-0.310022	0.198782	-0.08448
Q9UQ90	0.114692	0.0112638	-0.0533284	-0.181733	0.0704485	0.11338	-0.00321563	0.0750916	0.10701	-0.0204343	-0.110855	0.0304473	-0.0534033	0.0518377	-0.1512
Q01995	0.235943	0.212174	-0.259534	-0.131061	0.188244	-0.024429	0.03249	0.0742725	0.0520188	0.0627446	-0.272996	-0.1094	-0.0425347	-0.0389693	0.0210361
Q7Z460	0.01822	0.0423459	0.0571148	-0.0934931	0.0242676	-0.00644112	-0.0335165	-0.0366645	-0.0330503	-0.00412179	-0.0804151	0.0660805	0.0550369	0.00931431	0.0153224
Q9Y617	-0.114533	0.105213	0.214051	-0.604967	0.0121603	0.110904	0.0802722	0.00833673	0.0180146	0.138674	0.283258	-0.13211	0.0377581	-0.06745	-0.0895815
P20962	-0.0524928	0.0984971	-0.0500982	-0.0814161	0.105034	0.0579474	0.0634332	0.0252056	0.054069	-0.00209049	-0.146119	-0.151892	-0.0489683	0.09241	0.0364807
P11586	0.0694686	0.588101	0.153019	-0.736805	0.558747	-0.0109753	0.133654	0.146292	0.00737473	-0.0965451	-0.410421	-0.389321	-0.429855	0.631573	-0.214306
P29966	-0.199592	-0.257501	-0.017407	0.872001	0.222441	-0.0104824	0.0210989	0.125434	0.136083	-0.179553	-0.446005	-0.503702	-0.287908	0.308965	0.216128
Q1KMD3	0.0481705	-0.47415	-0.2304	0.711137	-0.196265	-0.0757275	0.0759202	-0.00820663	0.0955191	-0.0758578	-0.34706	0.150188	0.351682	-0.170893	0.145943
Q13751	-0.0740862	-0.0485939	0.0534118	-0.11921	-0.00311953	-0.0265531	0.0938434	-0.0227742	0.0324979	0.0106548	0.147657	-0.0226507	0.0126617	-0.000696072	-0.0330429
Q9UHB6	-0.0974113	-0.195635	0.347643	-0.388076	0.0499439	-0.00628967	0.0499712	0.11971	-0.223014	0.00319069	0.23787	0.227095	0.124905	-0.354609	0.104706
O95425	0.0550318	-0.0577564	-0.135385	-0.0802838	-0.129424	0.165028	-0.000385905	0.00397392	0.162119	0.0209184	-0.121533	0.0312984	-0.0709864	0.118922	0.0384631
Q52LJ0	0.210501	-0.0989611	0.101117	-0.0893893	0.108236	0.101615	-0.0357476	-0.00252105	-0.00874169	0.13872	-0.02843	-0.269817	-0.150552	0.106276	-0.0823049
Q9NW13	-0.176362	-0.185462	0.0312673	-0.119639	-0.067485	-0.0423642	0.108223	0.116652	0.0746325	0.135273	0.340055	-0.0530925	-0.0711789	-0.127319	0.036799
P40818	0.0873385	0.134952	0.0787533	-0.102855	-0.230918	-0.0476079	-0.132396	0.0680036	0.052557	0.0904295	0.115139	-0.033257	0.00198186	-0.241062	0.158942
Q16706	-0.0144463	-0.0181622	-0.0182241	0.10715	-0.000592802	-0.0721685	-0.0316927	-0.107657	-0.166587	-0.10058	0.050027	0.154735	0.0843812	0.0607832	0.0730338
Q92614	0.0768824	0.0477703	-0.142491	-0.0358588	-0.026475	-0.058879	0.113787	-0.0808688	-0.142117	0.0156186	-0.0896622	0.0986096	0.25862	0.111605	-0.146541
Q9HCS7	-0.225655	-0.12206	-0.171751	0.0442239	-0.0215181	0.00156593	-0.00277656	-0.0367134	0.14856	-0.00879022	0.024302	0.17574	0.162794	-0.0930778	0.125157
Q15020	0.0927094	0.126587	0.225692	-0.0866699	-0.0718149	-0.0158889	0.0409423	0.0178559	-0.0390721	-0.117612	0.12432	-0.18817	-0.0899789	0.156591	-0.17549
O75348	0.0752365	-0.0123114	0.0194281	0.137509	-0.0737164	-0.00924397	-0.00468816	-0.00715322	-0.00448468	-0.0246593	-0.0433659	-0.00602311	0.00738356	0.0226985	-0.0766098
P17568	-0.156932	-0.112047	-0.012438	0.165293	-0.0140162	0.0109753	0.00367756	0.014232	0.0331977	-0.0572054	-0.0110245	0.0830468	-0.0521329	-0.0121559	0.117529
Q9UHV9	0.0829435	0.236764	-0.0593125	-0.0150307	0.0566292	-0.040364	0.0618442	-0.118061	-0.170631	0.118518	0.0957642	-0.0347815	-0.0243605	0.0476644	-0.237586
O94906	-0.131793	-0.258582	0.0423104	0.118034	-0.0919091	-0.147245	-0.0755268	0.161705	0.207482	-0.0647993	0.410103	0.0688001	-0.207566	-0.138381	0.107368
Q86Y79	0.0361046	-0.0852254	0.0204964	0.0460671	0.0229808	-0.0134405	-0.0201188	0.00383321	-0.0260242	0.00111933	0.0215027	0.0282583	-0.100326	0.0411805	0.0235922
Q9NR33	0.03519	0.0732044	-0.0370604	-0.0413739	0.0137139	0.00609819	-0.0158554	-0.0253135	0.0430689	0.00869516	-0.0275414	-0.0429736	0.0284449	-0.0101965	-0.00810087
P35232	-0.319082	-0.635589	-0.186861	0.715634	-0.572304	0.0682433	0.0802067	0.11459	0.0351537	0.0558263	0.369068	0.421319	0.236118	-0.392147	0.00982359
P55196	0.0683886	-0.140513	0.16298	0.0962604	-0.114375	-0.139832	0.160333	-0.121143	-0.172525	0.00880438	-0.149813	0.0612649	0.118517	-0.003115	0.164767
O15020	-0.244962	-0.130707	-0.178289	0.0760246	0.27184	0.241871	0.239261	-0.086836	-0.129136	-0.132899	0.322799	-0.0406878	-0.0449236	-0.136057	-0.0272984
O75717	0.0197505	0.0980262	-0.0502818	-0.257347	-0.191304	0.171337	-0.0244317	0.094939	0.159119	0.036804	0.0491994	-0.047083	-0.00396225	0.181228	-0.235994
Q08379	-0.0194537	-0.18606	0.183578	-0.0739457	0.0290241	-0.0763509	-0.151311	0.0870344	-0.134758	0.0164252	0.00913918	0.226967	-0.0395396	0.109118	0.0201329
Q86TM6	-0.0253235	-0.0684003	0.017614	0.158114	-0.0504267	-0.033187	0.0595095	-0.0113291	0.0832762	-0.15478	0.0487186	-0.0401506	0.00509443	0.0721688	-0.060898
P33176	0.194238	0.351369	-0.102489	-0.117918	0.15603	-0.101249	-0.228199	-0.0608549	0.0151513	-0.191079	0.146105	-0.0703619	0.0946091	0.00966961	-0.0950216
O60524	0.2001	-0.0764155	-0.330126	-0.0491892	0.0827934	-0.101693	0.0661946	0.0406478	-0.0656839	0.0385589	0.119371	0.0647306	-0.0339524	0.00331771	0.0413462
Q9C0C2	0.0177667	0.34739	-0.0645976	-0.43743	0.0320429	-0.105845	-0.158249	-0.0831465	-0.148228	0.201913	0.131498	-0.0730437	0.0699563	0.450368	-0.180397
Q9UHD8	0.158342	0.414857	0.0178136	-0.567093	0.146055	-0.00889739	-0.0181308	-0.009286	-0.0279028	-0.00780206	-0.40448	-0.1675	-0.138855	0.684204	-0.0713238
Q00610	0.494605	0.451874	0.707419	-0.467226	-0.204545	-0.335738	-0.268462	-0.455787	-0.247113	-0.438781	0.0207548	0.40083	0.280305	0.410118	-0.348254
P49327	0.321165	1.32377	-0.0492484	-0.883242	0.643835	-0.229398	-0.373823	-0.151063	-0.202798	-0.00377105	-0.427226	-0.236178	-0.039744	0.484382	-0.176658
Q9H4A4	0.169158	0.174653	0.0152394	-0.21301	0.319545	-0.0111461	0.0117529	-0.00797721	-0.135497	0.08734	-0.26463	0.00614281	-0.148151	0.0752412	-0.0786622
O76021	-0.217557	-0.283125	0.0482974	0.191899	-0.266851	0.0130771	-0.135626	0.00616467	-0.0241216	-0.042815	0.30134	0.444206	0.330222	-0.319153	-0.0459572
P35606	0.109539	0.343328	-0.153147	-0.346038	0.301629	-0.0206239	-0.0139595	0.115098	-0.0539061	-0.0357937	-0.0562264	-0.218787	-0.186121	0.274386	-0.0593783
Q14676	-0.0230774	-0.180419	-0.0206104	0.0692773	-0.049155	0.0957531	-0.079819	0.126354	-0.0999304	-0.0881862	0.0201615	0.15892	0.119217	-7.55223e-05	-0.0484093
P53985	-0.178144	-0.197081	0.0521256	0.0452322	-0.0626497	0.0154924	-0.0598657	0.0146783	0.0228229	-0.0753864	0.205876	0.0544888	0.00558532	0.0138984	0.142926
Q9BY42	0.0763816	0.12714	0.0410293	-0.0450216	0.00584228	-0.0140392	-0.0321066	-0.0162097	-0.031583	-0.0406266	-0.0184785	-0.0161328	-0.0236674	0.0514664	-0.0639947
Q9P032	0.0107844	-0.0245672	0.072911	-0.068934	-0.0472004	-0.0357383	0.0409346	-0.00286763	-0.00714978	-0.0283827	0.055637	0.0608558	0.035591	-0.0257166	-0.0361573
Q9GZS1	-0.0883484	0.000688722	0.0608237	-0.0660103	-0.0315382	0.106951	0.0571128	0.0489248	-0.130445	0.0405337	0.113843	0.00737027	-0.0434034	-0.151151	0.0746479
P55809	-0.0522421	-0.167792	-0.144426	0.34467	-0.253873	-0.0402086	-0.00717371	-0.0475022	0.143994	0.255642	0.0173546	-0.0361508	0.103359	-0.116615	0.000964791
P56192	0.0705856	0.201513	0.229881	-0.148706	0.0998312	-0.0182082	-0.102037	0.125388	-0.176533	-0.126918	0.192004	-0.101872	-0.158998	0.0675137	-0.153443
P52272	-0.284684	-0.335372	-0.00782201	-0.613758	-0.639146	0.283008	0.125885	0.091457	0.346146	0.306806	0.740294	0.177171	0.14155	-0.359422	0.0278857
Q4KMQ1	-0.0339746	-0.00803107	-0.0168476	-0.112461	0.0364395	0.0295818	0.00897411	0.0338353	-0.0111489	-0.00228736	0.0169153	0.0745781	0.0323913	-0.0485472	0.000582481
Q7Z4V5	-0.0156986	0.0435071	-0.035942	0.0710765	-0.000504794	0.0909073	0.0380959	0.112899	0.0416079	-0.012709	-0.0388968	-0.167203	-0.089352	0.117721	-0.155509
Q13045	0.0464979	0.164007	-0.0746592	-0.162309	-0.036402	0.0962591	0.0427576	0.000414006	-0.00819649	-0.0845815	0.158449	0.0564712	-0.105622	0.0286371	-0.121723
O60306	0.167379	-0.173711	-0.166187	0.0782311	-0.100966	0.0287132	-0.089412	0.123885	-0.113854	-0.0364792	0.040915	-0.0182029	0.128512	0.0795734	0.0516029
P27708	0.0290726	0.194969	0.0847014	-0.136521	0.0878642	0.0182714	-0.223995	0.0108439	-0.00186818	-0.0452317	-0.202964	-0.14344	-0.0986878	0.321399	0.105587
P31483	-0.0577835	-0.00170074	-0.150857	0.0141811	0.0014209	0.00240771	-0.0285809	0.0685265	0.0106972	-0.015065	-0.0241189	0.0441431	0.0862845	0.0178311	0.0326136
Q15006	-0.0803111	-0.2566	-0.0648972	0.389092	-0.0813616	0.0287365	-0.0340685	0.0848908	0.0307381	0.00254931	0.035467	0.130483	-0.00411551	-0.139341	-0.0412612
P62258	0.113518	1.2848	-0.120372	-0.519507	0.47359	0.140206	-0.294612	-0.363986	0.208516	0.104277	-0.424078	-0.969306	-0.128256	0.428122	0.0670857
P49257	-0.209492	-0.136703	-0.0960362	0.185989	-0.107395	0.0567709	0.213265	0.108045	0.132747	0.0692822	-0.0692105	-0.148155	-0.0477366	0.0900638	-0.0414331
Q969H8	0.00192179	-0.0693759	-0.131834	0.196914	-0.219199	0.0469264	-0.0288671	0.210184	0.0491387	-0.0111794	-0.120911	0.172622	0.0494429	-0.0643093	-0.0814739
P50851	-0.0173831	0.220613	-0.0789507	-0.0496628	0.0081355	-0.10951	-0.0352821	0.0445764	-0.0207947	0.0603776	0.0490099	-0.177625	-0.10157	0.191282	0.0167838
Q8IWA0	-0.0518065	0.0351067	0.193706	-0.0967833	0.0212643	-0.0414212	-0.157228	-0.267683	0.0231966	-0.123003	0.203909	0.181942	0.129564	-0.103522	0.0527592
O00273	-0.0160424	0.0190878	-0.0170332	-0.0148541	-0.0462119	0.125605	0.0263322	0.0438363	0.00864155	0.0286773	-0.0713369	-0.0703469	-0.0217635	0.036831	-0.0314221
P35908	0.809341	0.873779	-0.383723	0.272088	0.617854	-0.294896	-0.273533	-0.275272	-0.334307	-0.225695	0.670161	-0.372069	-0.134776	-0.836277	-0.112675
Q9UQ35	0.0280523	0.272382	-0.151995	-0.707402	0.0488249	-0.219974	0.0746891	0.040341	-0.0398561	0.192875	0.131621	-0.123163	-0.0132638	0.184427	0.282441
P31040	-0.21491	-0.566822	0.0237152	0.577471	-0.279635	0.940766	-0.0720223	-0.0354063	-0.0184369	-0.0528521	-0.119415	0.115075	0.0734832	-0.123364	-0.247647
Q08380	0.0848966	-0.113042	-0.458176	0.530523	-0.223727	0.0203668	0.0318492	0.0444217	0.0420295	-0.0130013	-0.211541	0.214469	0.00520961	0.0147825	0.0309386
Q5JTZ9	0.0280521	-0.0667048	-0.0636686	0.0695342	-0.0990511	-0.0197946	-0.00516737	-0.231708	0.0251801	0.0040722	0.187478	0.0997567	0.152735	-0.0669115	-0.0138024
Q8WUM0	0.129861	-0.0729857	-0.138342	-0.212794	-0.0189953	-0.126671	-0.20527	0.255079	0.19357	-0.212813	0.193959	0.0585208	0.0337491	-0.0141514	0.137284
P04406	-0.127262	1.75323	-0.135419	-1.02055	1.01635	-0.282782	0.225981	0.00821646	-0.0773118	-0.0646894	-1.46466	-0.219776	-0.215889	0.568812	0.0357464
O95104	-0.00436427	0.00142018	-0.0519273	0.0652731	0.0337373	-0.0853488	0.0021927	0.0266136	-0.059808	-0.0192055	0.0408645	0.0188857	0.110595	0.00368933	-0.0826171
Q8WX93	0.0321885	0.213999	-0.0889192	-0.218073	0.105111	-0.0415333	-0.0168842	-0.0297402	0.0496451	-0.13616	0.00896953	-0.192303	-0.0230049	0.10926	0.227444
Q86XP3	0.0555919	-0.196148	0.1232	0.0545469	-0.0841093	-0.109262	-0.13074	-0.00139092	-0.0315212	0.0304869	0.280611	0.0597448	0.267161	-0.289289	-0.0288821
Q13123	0.110366	-0.103885	-0.023297	-0.097569	0.0740802	0.0539577	0.108717	0.0473735	-0.104748	0.057706	0.0675743	-0.247897	0.00545067	-0.0459927	0.0981628
Q96CT7	-0.103668	0.191123	-0.00352071	-0.0148612	0.240898	0.0101189	-0.022293	0.0745069	0.0218762	-0.113539	-0.128229	-0.0428941	-0.107645	0.125657	-0.12753
Q9UKD2	-0.087742	0.117448	0.145202	-0.0142553	-0.0481156	-0.00839635	-0.00445199	0.0741723	0.0605765	0.189926	-0.0965071	-0.0293975	-0.285006	-0.180979	0.167526
P19623	0.0716302	0.156658	0.0916668	-0.240483	0.047185	-0.044073	0.0186252	0.0218132	0.000278088	-0.0554097	-0.0322217	-0.0138752	-0.0326569	0.0532215	-0.0423593
P26006	-0.247685	-0.221196	-0.227096	-0.0460046	-0.0618095	0.0703652	0.131643	0.163487	0.283456	-0.0481647	-0.173069	-0.0612752	0.192129	0.145262	0.0999572
Q92925	-0.010114	-0.0250139	-0.0844225	-0.0855563	0.0370224	0.122636	0.0456358	0.0162163	-0.101215	0.114594	-0.0268985	-0.0675232	0.0165871	-0.0849479	0.133
Q562E7	0.00800855	0.0106626	-0.00627012	0.0089689	-0.0128723	0.000401968	0.000767126	0.00423937	0.000387753	-0.0050254	-0.00126642	-0.0165988	0.0127045	-0.00957026	0.00546259
Q9P2R3	-0.161774	0.0775289	-0.0500112	-0.130228	0.152557	0.0670763	0.0552789	0.127601	0.0532517	-0.109425	0.106652	-0.222872	0.0223809	-0.00826362	0.0202475
O75175	0.0473564	0.0253999	-0.00164768	-0.209814	0.0566301	0.0257609	-0.0826839	0.0559486	-0.00483862	0.043902	0.0761644	-0.031337	-0.0190564	0.128948	-0.110732
P46379	0.183332	0.142951	0.0920123	-0.16913	0.231199	-0.0170123	-0.0414644	-0.0753146	-0.0826642	-0.149254	0.000400185	-0.0520932	-0.112829	0.18016	-0.130292
Q9NSD9	0.0776678	0.28701	0.282534	-0.462194	0.104067	0.0538172	-0.123596	-0.0743833	-0.173241	0.0150326	0.164285	-0.3992	-0.0651228	0.230402	0.0829216
P52758	-0.0435579	-0.0844052	0.00292435	0.131892	-0.0913311	-0.0196357	-0.0145846	0.0688978	-0.0272122	0.0615915	-0.00176739	0.0879501	0.0474948	-0.0976335	-0.020623
Q9Y315	-0.00220613	0.222931	-0.073714	-0.0532507	0.0143055	-0.0507077	-0.0435795	0.0189212	0.0163765	0.11364	-0.126181	0.116269	-0.0646461	-0.0179899	-0.070168
Q86UP2	-0.0460992	-0.450983	0.108347	0.61558	0.0149988	-0.0613533	0.0211197	-0.0998904	0.0496622	-0.220186	-0.0458554	0.10289	0.0760149	-0.182942	0.118697
P09758	-0.00871396	-0.106025	-0.271084	0.161835	-0.155568	-0.0174819	0.0864043	0.105542	0.0688995	0.00869677	-0.140422	0.0793189	0.0801746	0.071876	0.0365491
P56545	0.0309132	0.114012	0.145004	-0.0900637	0.0407944	-0.0569623	-0.0900219	0.00577462	-0.0748802	-0.0201809	0.118707	-0.0717788	-0.0626602	0.0209077	-0.00956499
Q9Y5K8	-0.0491946	-0.0470761	0.081862	-0.111414	0.0830209	-0.0443818	-0.057662	0.0406791	-0.0318582	-0.101076	-0.0284034	0.106975	0.100328	0.00895338	0.0492481
P22102	0.0562556	0.215504	0.0965934	-0.4226	0.179571	-0.00253256	-0.0236581	-0.0178951	0.0584686	-0.186558	-0.0548141	-0.0524663	0.0672387	0.0765966	0.0102956
P56182	-0.0163105	-0.11633	-0.110478	-0.134456	-0.160768	0.0659156	0.118044	0.0861447	0.0330467	0.0813226	0.157718	0.063119	0.0628881	0.00406399	-0.133921
Q9H4A6	-0.00735184	-0.0307652	0.0080372	-0.00366677	-0.0244673	0.0336683	0.0127405	-0.0602471	-0.0564823	0.0460899	0.222796	-0.0840867	-0.0688727	-0.0473965	0.0600042
Q92499	0.310693	0.146012	0.178763	-0.480824	0.0469909	0.0394111	0.0514273	0.0109367	-0.0257733	-0.0369569	0.078298	-0.250628	-0.266333	0.260484	-0.062502
P46926	-0.0432628	0.183395	0.0289068	-0.161308	-0.0741051	-0.038136	-0.0222191	0.052255	0.0613231	0.0132323	-0.0596396	0.0466209	-0.00720337	-0.0299076	0.0500485
Q8IYS2	-0.0576347	0.0247551	0.0505127	0.0615653	0.0107496	0.0536965	0.00233178	-0.0161225	-0.0436581	-0.0180166	-0.0491273	-0.0612182	0.0142034	0.0633117	-0.0353486
Q8N1G4	0.0523497	0.189984	0.109929	-0.239177	0.266849	0.00239479	-0.163303	0.00886436	-0.0917255	0.0305246	0.0878303	-0.0320645	-0.156149	0.00893538	-0.0752417
P28838	-0.10523	0.127615	0.0543096	-0.096516	0.0637408	-0.0928079	0.121112	-0.00722734	-0.0294625	0.094607	0.0584992	0.00443214	-0.00361184	0.0138377	-0.203297
Q99459	-0.109651	-0.216988	-0.26326	0.0229337	0.0164629	-0.0491298	-0.0229331	0.000272618	0.236816	0.015142	-0.121969	-0.00942714	0.258958	0.0507698	0.192002
P62424	0.0827784	0.460953	0.179247	-0.925767	0.152484	0.168398	0.0985113	0.161525	0.189155	0.0968065	0.290662	-0.766713	-0.400423	0.0381937	0.174188
P07237	-0.386263	-0.383943	-0.270143	0.605832	-0.298835	-0.957707	0.236363	0.393512	0.356362	0.434984	0.23374	0.572842	0.663227	-1.18458	-0.0153952
O75533	0.256034	-0.494465	0.175108	0.0462931	-0.407691	-0.0683722	-0.144766	-0.182726	-0.179235	-0.197759	0.700216	0.252289	0.230243	-0.0431072	0.0579387
Q9BW92	-0.0300644	-0.142926	-0.219488	0.105375	-0.083449	0.0127265	0.172898	0.0153776	0.0543211	-0.0294379	0.0747698	-0.00639911	0.105086	0.0147927	-0.0435813
Q13459	0.119764	0.314191	-0.12092	-0.278221	0.444069	0.0174765	-0.0520186	0.096692	0.0381596	0.0102727	-0.181069	-0.162064	-0.139584	0.0242998	-0.131048
O75446	-0.00874023	0.00331161	0.0261593	-0.0131585	0.0158785	0.0163336	0.0099503	-0.0146057	-0.000261504	-0.0163564	-0.0231023	-0.00718548	0.0321662	-0.0740235	0.0536342
Q15785	0.0269147	0.132247	0.0318275	-0.244653	0.106631	-0.0597847	0.0212757	-0.0934549	-0.0428019	0.0998883	-0.00955699	0.0443753	-0.135098	0.135334	-0.0131434
P27694	0.337077	0.297039	-0.0494728	-0.279155	-0.0204985	0.0286263	0.0364037	0.0158315	0.0668474	0.15127	-0.125707	-0.349206	-0.223462	0.294571	-0.180163
O75369	-0.386429	1.23106	0.0976457	-1.48426	-0.141154	-0.0461094	-0.119481	-0.218605	-0.110021	-0.161167	0.31204	-0.68628	0.0730786	1.22181	0.41787
Q9BZE9	0.000347915	0.00323872	0.0183112	-0.112876	0.0255185	-0.0214606	-0.0318413	-0.0597887	-0.000634152	-0.0177267	-0.0332503	-0.0383176	0.0607662	0.0277599	0.179953
Q9Y520	0.0513882	0.0412282	0.0612024	-0.213674	0.176621	0.0831416	-0.135718	0.0562223	0.0101026	0.0860338	-0.0855181	-0.28779	-0.0226937	0.1217	0.0577542
Q5T653	-0.0324762	-0.0922044	-0.0157295	-0.0939205	-0.0703785	0.0884188	-0.0420041	0.0149726	0.0754321	-0.0390468	0.204237	0.0168356	0.064541	-0.0868589	0.0081814
Q8N5M9	-0.059098	-0.0618929	0.0245285	0.104918	-0.032744	0.0524462	0.0710122	0.0358683	0.021017	-0.0580479	0.0390313	0.0302307	-0.127426	-0.0276955	-0.0121479
P10586	-0.0115447	0.150121	-0.347694	0.187602	-0.149974	-0.0279155	-0.191811	0.0424745	-0.035498	-0.11107	0.00548387	0.201797	0.237156	-0.0329419	0.0838154
Q14974	0.476015	0.0514501	0.467694	-0.38473	0.162649	-0.238958	-0.317555	-0.351516	-0.16303	-0.181863	0.174071	0.0757364	0.129944	0.194627	-0.0945336
P05386	0.230536	0.278666	0.207285	-0.428787	0.0934396	0.0205272	-0.0178137	-0.0631456	-0.19	-0.181884	0.222388	-0.267746	-0.0937111	0.136329	0.0539167
Q9Y230	-0.0187999	0.168976	0.221101	-0.683067	0.0263888	0.0948523	0.151579	0.11593	0.0792688	-0.189247	0.278618	-0.0124672	0.0656102	0.0626654	-0.361407
P33316	0.0410378	0.302498	-0.0911852	-0.274604	0.14229	0.164021	-0.00294102	-0.0180261	0.00683022	-0.0486622	-0.110208	-0.0952287	-0.147602	0.201206	-0.069426
Q9H9Y6	-0.0629548	0.112165	0.00835891	-0.0303334	0.0290839	-0.123509	-0.0754318	0.00727274	0.0250076	-0.0195329	0.00635487	0.0181558	0.0586693	-0.0382219	0.0849164
Q9H444	-0.0879877	0.180037	-0.103177	-0.094299	0.175362	0.0290549	0.084506	0.120665	-0.0356639	-0.0664606	-0.0708038	-0.127113	-0.0465672	0.0822497	-0.0398017
Q8TEX9	-0.0821581	0.148669	0.35535	0.0130666	0.044204	0.0831388	0.10462	0.137579	-0.259577	0.138952	-0.208811	-0.0251945	-0.370539	-0.305559	0.22626
Q15021	0.192545	0.332862	-0.0373228	-0.492581	0.104028	-0.0307819	0.0453128	-0.0493123	-0.0586745	-0.0104539	-0.0220525	-0.0610238	0.00527899	0.180048	-0.0978726
O43795	0.102215	-0.323783	0.401417	-0.137369	0.0612602	-0.1229	-0.135536	-0.186816	-0.135593	-0.16061	0.65131	0.230098	0.151922	-0.259932	-0.135681
Q9UQ80	-0.088897	0.500468	0.129642	-0.542995	0.216932	0.0783974	0.0772561	0.0399143	0.0514496	-0.00951113	-0.0504276	-0.497135	-0.290096	0.356478	0.0285237
P78371	-0.0201916	0.379364	0.380617	-0.97521	-0.0904302	0.0555162	0.0276738	0.194277	-0.0169407	-0.0304401	0.156788	0.402503	-0.0141206	0.00315911	-0.452565
P61764	-0.027477	0.0432819	0.0703689	0.0469751	-0.0441362	-0.0183925	0.0160673	0.00871512	-0.012529	0.0556804	0.00737521	-0.0238742	-0.00246728	-0.0370969	-0.0824908
Q5SRE5	0.0423167	0.00509588	0.0362547	-0.326874	0.199034	-0.12753	-0.0178543	-0.0280056	0.0821731	-0.0623239	0.0633549	0.0216899	-0.0620494	0.0302854	0.144433
Q2TAY7	-0.276488	-0.177848	0.0169852	0.344549	0.0320759	0.00750987	0.034811	0.0462086	0.117911	0.0694177	-0.00114977	-0.0681308	0.113029	-0.325169	0.0662883
Q96PK6	0.0940834	-0.382429	0.0352599	-0.646826	0.113719	-0.100561	0.0691616	0.0963219	0.0234722	0.0651867	0.529281	-0.132334	0.0504837	-0.0821585	0.267339
Q96RK0	0.0868956	0.0856088	-0.0110852	-0.0702682	0.0495113	0.0110809	-0.0227217	-0.031476	-0.0446675	-0.0380451	0.01973	-0.0495299	0.0137665	-0.0663836	0.0675844
Q8TEW0	-0.00310816	0.108944	-0.0524418	-0.125966	-0.00259066	0.0237129	0.0547981	-0.00347474	0.0411221	-0.00853252	0.010698	-0.021552	0.0258828	-0.0534786	0.00598674
P24821	-0.0530224	-0.39346	-0.304224	-0.293029	0.180211	0.213446	0.026397	0.0626638	-0.0616881	-0.0266273	0.135467	-0.20262	0.0772062	0.0917973	0.547484
Q92804	0.0171219	-0.188332	-0.0768877	0.152878	-0.0445614	0.0481505	-0.102394	0.073353	0.0473221	0.121983	0.0718478	0.0497018	0.0420135	-0.182237	-0.02996
P35637	-0.0929721	-0.414819	0.0276122	0.0952101	-0.154172	0.011849	-0.19422	-0.0333844	-0.00977007	0.063339	0.916306	-0.294268	-0.0563542	0.0219598	0.113683
Q9UHB9	-0.166954	0.121632	0.0445465	-0.189675	0.071421	0.0855549	0.102983	-0.0246099	-0.241573	0.0726679	0.136586	-0.135381	0.110735	0.114609	-0.102541
P11388	-0.0717552	-0.35611	0.210247	0.194925	-0.122097	-0.0851674	-0.052107	0.0452782	-0.0268597	0.00494977	0.255527	0.102765	-0.116242	-0.094067	0.110715
P07741	-0.0574591	0.31314	0.017237	-0.2441	0.214278	0.0586739	-0.0218386	-0.0332771	0.00669116	0.0608747	-0.178387	-0.131637	-0.0545655	0.0454946	0.00487353
P13569	0.0251219	-0.186827	0.108177	-0.149816	-0.137177	0.0927627	0.0845233	0.0611374	0.0315207	-0.214151	0.225411	0.0167395	-0.0871556	-0.0128514	0.142585
Q15075	0.1935	-0.281133	0.0720158	0.0816147	0.0182859	-0.0103527	0.0192307	0.00997309	-0.00312863	-0.0459965	-0.0593241	0.0918323	-0.0632227	-0.0585794	0.0352842
Q9P2E9	-0.0307322	-0.412269	0.206026	0.0203748	0.0168301	0.17246	0.0365957	0.0489301	0.18947	0.0973628	0.067516	-0.42882	-0.382895	0.0800602	0.319091
Q6YHU6	0.114637	-0.0224422	-0.0480051	0.0990763	-0.148423	-0.0864912	-0.0208027	-0.0454535	-0.0264861	-0.0199182	0.00237471	0.0455173	0.0697816	0.00455156	0.0820834
O14744	0.330278	0.42818	0.081827	-0.319382	-0.162961	-0.143463	-0.00526339	-0.0280873	-0.059066	-0.0771303	-0.0361938	-0.11269	-0.174064	0.0763564	0.201659
Q96I25	-0.159697	-0.0452874	-0.109548	-0.117137	0.0593593	0.0140634	0.0599042	-0.0649581	-0.0412369	0.042629	0.105399	-0.0819015	0.00819109	0.150068	0.180152
O60645	0.00633439	-0.0364909	0.0285245	0.0649983	0.058473	-0.0402675	-0.0339981	-0.00162476	-0.0366624	-0.0207744	-0.0183421	-0.0195246	-0.00984796	0.0570536	0.00214873
Q96DI7	-0.0404133	-0.081157	-0.123526	0.266014	-0.0905489	-0.00288641	0.0220516	-0.0557923	0.000949869	0.205816	-0.196052	0.0742483	0.0937861	-0.00141001	-0.0710794
Q9NTJ3	0.0525199	0.220875	0.137372	-0.360238	0.145701	0.0312911	-0.0607449	0.0298455	-0.0729761	-0.0097437	-0.0033338	-0.142941	-0.237942	0.317534	-0.0472191
P22234	0.215789	0.370648	0.216253	-0.490168	0.222487	-0.065359	-0.011846	-0.0320983	-0.0308712	-0.0510815	-0.122023	-0.279535	0.0453351	0.153452	-0.140981
P61970	0.142581	0.0645319	0.0193624	-0.188325	0.286058	0.00653029	0.0129411	-0.02574	-0.102514	-0.0038109	-0.127313	-0.11142	-0.0352401	0.156322	-0.0939636
Q7Z417	0.00490624	0.201679	-0.0583186	-0.0889352	-0.0640521	-0.000223562	-0.0381226	-0.035112	0.0346855	0.0446103	-0.0141912	0.00972135	-0.0344076	-0.00216913	0.0399296
P19338	-0.591008	-0.606064	0.970909	-0.291291	-0.861645	0.314597	0.388051	0.460282	0.322688	0.267325	1.39434	-0.52707	0.0525254	-0.877401	-0.416237
P62913	0.114942	0.190839	0.317878	-0.437259	0.211827	-0.0689227	-0.0654008	-0.117033	-0.0459025	-0.0760022	0.13787	-0.208091	-0.199028	0.219052	0.0252312
P02765	-0.211129	-0.188911	-0.0631796	0.158267	0.095035	0.0524	0.0390828	-0.104217	0.15827	0.0661611	0.0820277	-0.177788	0.0968557	-0.140767	0.137891
Q69YQ0	-0.0439188	-0.0140221	0.125285	0.0791543	0.00303388	-0.0419568	-0.109143	-0.0379193	-0.000892661	-0.0230201	-0.0550295	0.143353	-0.0412012	0.0546916	-0.0384154
P15144	0.220905	-0.278569	-0.583356	0.541749	-0.17583	0.0621257	-0.00351215	0.0508165	0.0851418	0.0537476	-0.461164	0.135262	0.0612404	0.127091	0.164351
Q9HC35	0.102372	0.107968	-0.223724	-0.00772878	0.171246	-0.0347352	0.0274982	-0.0956518	-0.146002	-0.0234443	0.0942925	-0.0366241	-0.0261791	0.08136	0.00935258
Q9H1K1	0.0204862	-0.0374436	0.0688443	-0.0590316	-0.0515624	-0.0412912	0.00371422	0.04301	0.0965395	-0.0564393	0.115305	-0.104608	0.0697599	-0.038284	-0.0289987
P24941	-0.133664	0.128692	-0.0413601	-0.0293726	0.034648	0.131294	0.0323445	0.0551052	0.0120579	0.102374	-0.0718767	-0.0197689	-0.128239	0.117351	-0.189586
O00151	0.0662471	0.246224	-0.0119821	-0.475296	0.470865	-0.0367623	-0.270726	0.0229283	0.00677888	0.00913867	0.0835809	-0.402547	0.0758923	-0.149075	0.364734
Q8IVF2	0.0331263	-0.0253335	0.0349213	0.0250037	0.128667	-0.0626	0.0245729	0.117892	0.0666095	-0.266165	-0.102812	-0.118378	0.087784	-0.0590393	0.115751
Q9Y240	0.0169021	0.0486445	-0.016143	-0.172567	0.0220989	0.0808695	0.0446115	0.0854405	-0.0124906	0.0525318	-0.0319672	-0.125967	-0.0507234	0.020954	0.0378059
O43747	0.213681	0.0920628	0.0295069	0.101913	-0.0309357	-0.00330391	-0.150882	-0.0189729	-0.247383	-0.192439	-0.10262	0.113763	-0.0153915	0.299991	-0.0889888
P54920	-0.0997407	-0.0628926	-0.254281	-0.179363	0.303572	0.0328489	0.0597664	0.0403682	-0.138976	-0.021083	-0.159841	0.181676	0.0491527	-0.135559	0.384352
Q8NFW8	-0.036469	-0.00492986	0.0485645	0.0245334	-0.102725	-0.0306253	-0.0522667	0.155756	-0.094882	0.00370589	-0.0626484	0.17446	0.0558573	-0.0287556	-0.0495748
P11766	0.0864797	0.188596	-0.0411986	-0.211398	0.11141	0.00659174	0.0919897	-0.0718491	-0.010127	-0.0358465	0.049268	0.0453118	-0.0402822	0.078734	-0.247679
P34897	-0.30683	-0.771668	0.0413141	0.6501	-0.479573	-0.106206	-0.0471702	0.00755333	0.116295	0.184747	0.354356	0.393993	0.380814	-0.371433	-0.0462925
Q12788	0.0716418	-0.201018	0.246792	-0.0691618	0.0213849	-0.0455369	0.118374	-0.0985165	0.0458114	-0.0510456	0.207666	-0.0924879	0.0233315	-0.0563707	-0.120864
Q92879	-0.0810859	-0.144424	-0.0260644	0.145795	-0.113526	0.00475967	0.000878533	0.0389416	-0.260351	0.028231	0.190561	0.0784105	0.0160582	0.0452429	0.0765726
P52815	-0.176966	-0.273212	-0.102929	0.154007	-0.175892	0.164973	0.103026	0.116097	0.00615404	0.0329325	0.139895	-0.0129815	0.159209	-0.230144	0.0958288
P08727	0.566844	-0.160141	-1.3303	1.27958	0.559598	-0.0780872	-0.0814114	-0.0538549	-0.134017	-0.19757	-1.59401	-0.572317	0.22931	0.599404	0.966968
Q96FS4	-0.0472652	-0.0612725	0.0414273	0.0744239	-0.0462569	0.0176746	0.00909402	0.0486683	0.0143431	-0.064629	0.0874192	-0.0744801	-0.0241507	-0.0592976	0.0843014
Q92922	-0.0752044	-0.0690659	0.212997	-0.0802003	-0.266879	-0.216462	0.133145	-0.128469	0.0569749	0.0168491	-0.00403332	0.232624	0.00654693	0.143681	0.0374961
P12081	0.00961585	0.395695	0.140199	-0.314162	0.230979	-0.0603919	0.0666126	-0.0368465	-0.0386733	-0.0607046	-0.156549	-0.0289541	-0.0233121	0.0494705	-0.172978
Q9H0D6	0.163227	-0.0411843	0.0761079	0.0292681	-0.370743	-0.0549892	-0.0949269	-0.00458959	-0.00151764	-0.111713	0.213819	0.170288	0.26342	-0.118819	-0.117648
Q9NRV9	-0.0932822	-0.0563281	-0.0142419	0.0221509	0.0474924	0.102621	0.0797931	-0.0111928	-0.0725104	-0.0288064	0.0909153	0.00918813	-0.0424348	-0.116682	0.0833181
P09601	0.0176751	-0.0141876	-0.258645	-0.0738108	-0.0376289	0.0933369	0.0735917	0.0185043	0.027181	0.0133837	-0.0755956	0.111964	0.143515	-0.20559	0.166307
Q92797	0.174978	-0.0956986	0.0966355	-0.0484352	-0.0817067	-0.0269362	-0.0984824	0.0203595	-0.0687377	-0.0663275	0.146539	-0.0179348	-0.0113406	0.0122575	0.0648297
Q14168	-0.0826686	0.0234841	0.0165761	0.0204326	0.00762972	-0.00627819	-0.00703816	0.00373962	0.00882113	-0.0191229	-0.0798024	0.0144932	0.0468159	0.013476	0.0394418
Q5M775	0.0642204	-0.0839618	-0.0809236	0.161554	-0.100587	0.068972	-0.041459	-0.0545944	-0.0123291	-0.0684968	-0.186418	0.125976	0.159061	-0.0781533	0.127139
O75643	0.361981	-0.488225	0.563358	-0.0675968	-0.303492	-0.245817	-0.389473	-0.43826	-0.0937976	-0.129557	0.642583	0.591245	0.0361248	0.0255651	-0.0646385
Q12872	0.128652	-0.00521956	-0.000784349	-0.0625479	-0.0105266	-0.0381025	0.0422873	-0.014117	-0.00283379	0.00244659	-0.111489	0.0703805	-0.0183753	-0.00940807	0.0296372
Q15024	0.0522329	0.0108538	-0.15166	0.173185	-0.173937	0.0159448	-0.00983749	0.0450442	0.0657633	0.0261452	-0.158905	0.107471	-0.000107948	-0.0160788	0.0138855
P41227	-0.0322551	0.1329	0.104227	-0.0854442	0.0490269	0.0181713	0.108817	-0.000380334	0.0772455	0.0262887	-0.222433	-0.0497188	-0.109721	0.0235349	-0.0402588
Q9UKF6	0.0155293	0.0233824	0.0794482	0.0770862	-0.0214002	0.131855	-0.187665	0.00138254	-0.140786	-0.0669848	0.04082	0.17013	0.081602	-0.179129	-0.0252717
Q96EV2	-0.0210989	0.0221203	-0.0025018	-0.00970502	-0.0649349	0.0288841	0.0126892	0.0113325	-0.00892859	0.0589587	-0.0125599	-0.0312124	0.025796	0.0103191	-0.0191584
Q13813	0.0972805	-0.265698	-0.131783	0.470714	-0.144977	-0.20526	-0.390756	-0.256777	-0.214645	-0.160614	0.482666	0.0402707	0.387124	-0.13165	0.424106
P78346	0.12402	-0.0197439	0.201087	-0.0120389	-0.0458016	-0.0641304	-0.0573561	0.02895	0.0210193	0.0105249	-0.101085	-0.0338449	-0.0262868	-0.0555797	0.0302667
Q9H8H0	-0.092392	-0.234077	0.101498	0.00877028	-0.105157	-0.0448919	0.133435	0.099865	-0.112744	0.0041488	0.328469	-0.0834167	0.0480608	-0.0661037	0.0145347
P07814	0.11322	0.578612	0.35173	-0.848267	0.333431	-0.142367	0.040791	-0.083704	0.0577191	0.152967	-0.0230775	-0.458564	-0.29991	0.18187	0.045551
Q9Y5B9	0.17131	-0.111545	0.0409519	0.0393466	-0.186817	-0.106668	-0.0519721	-0.0617095	-0.0291121	0.0263475	0.690702	-0.277052	-0.156375	0.115516	-0.102923
Q99959	0.0987406	-0.267501	0.0736261	-0.258194	-0.0298111	-0.133433	-0.0291531	0.00188343	0.0609027	0.0855112	0.28465	-0.0101118	0.0725967	-0.125526	0.175819
Q9P287	0.103342	0.0548795	-0.0555402	-0.236926	0.0727353	0.165668	0.145935	-0.0700767	-0.114165	0.141097	-0.050421	0.0618745	-0.0109825	-0.14488	-0.0625403
Q3ZAQ7	0.0682262	0.0528977	0.00378382	0.176042	-0.236596	-0.0788424	-0.0569201	0.0171816	0.0351465	-0.0525135	0.0233605	0.132922	0.0600246	-0.0935585	-0.0511547
Q8WVV9	0.0357713	0.0404811	0.0245025	0.0740166	-0.112341	-0.145735	0.0479007	0.0575855	-0.0093259	-0.0814599	0.185912	0.00893496	-0.10059	0.0149928	-0.0406463
O95602	0.106453	-0.0333275	0.00855631	-0.000885191	-0.139951	-0.112514	0.0622089	-0.0617974	0.0879621	-0.0136558	0.00781172	0.063737	0.00866918	-0.0312119	0.0479446
Q13217	-0.10347	-0.00834399	-0.0635823	0.217557	-0.0094722	-0.2595	0.129623	0.130474	-0.181226	0.123905	-0.0148418	0.144328	-0.195896	0.0107646	0.0796804
O95490	-0.0123404	0.01149	-0.0244913	0.0671523	-0.139428	-0.0294892	0.01603	-0.0548073	-0.00116967	-0.0524316	0.145661	0.109012	5.71497e-05	0.02427	-0.0595147
Q7Z6Z7	0.133096	0.333641	0.0099391	-0.324533	0.212168	-0.188954	-0.116573	-0.236376	-0.0771775	0.00469258	0.00353232	0.043857	-0.0969515	0.207438	0.0922023
O75390	0.066513	-0.634203	0.170554	0.620791	-0.20647	-0.0504815	-0.0363284	0.00683658	0.0282882	-0.0559531	0.0521354	0.33715	0.215509	-0.545881	0.03154
O00139	0.0310565	0.0981441	0.041349	-0.279866	0.0348967	-0.0682964	-0.0212975	0.0149387	-0.0571918	0.00882152	0.0418866	-0.0552649	-0.00954447	0.225737	-0.0053692
P62851	-0.100956	0.457872	0.329142	-0.615769	0.174101	-0.00116843	-0.0121117	0.202041	-0.064502	0.0555972	0.106704	-0.701668	-0.254773	0.141184	0.284307
O96013	-0.0275771	-0.166409	0.0349738	-0.0246529	0.056719	0.0669425	-0.0921816	0.013107	0.032253	0.0686879	-0.00719073	0.0848166	0.0596072	0.0627102	-0.161806
Q13625	-0.00851316	0.00605711	-0.106362	-0.123865	0.00349266	-0.0156058	-0.00810817	0.0423535	0.0456687	0.0570528	0.115959	-0.0109755	0.0371109	-0.07172	0.0374549
Q6NXE6	0.130708	-0.00322935	-0.000188735	-0.0537102	0.00074359	-0.00961993	-0.0512226	-0.0125676	-0.00842027	0.0267731	0.000337078	-0.00289303	0.10253	-0.0369606	-0.0822797
P53041	0.203816	0.0523537	0.00339728	0.0118865	-0.00977262	-0.0126458	-0.0110829	-0.0180343	0.185931	0.0209275	-0.128098	-0.207879	0.168557	-0.179544	-0.0798129
P62910	-0.0711878	0.273217	0.146484	-0.740253	0.201597	0.0827824	0.0689196	0.0586463	0.0847913	0.173807	-0.0770185	-0.395218	-0.150232	0.12619	0.217474
Q9UNQ2	-0.0175222	0.119988	0.0221176	-0.135887	-0.218547	0.0679474	-0.0182083	-0.000214498	-0.0697868	0.111596	0.145339	0.107885	0.0435628	-0.102828	-0.0554411
P42765	-0.159121	-0.271758	-0.307824	0.128052	-0.178911	0.0407243	-0.0136939	0.169091	0.045312	0.100853	0.103539	0.413859	-0.0359954	0.00454679	-0.0386746
P78527	0.920258	-0.110601	0.140933	-0.659631	-0.540076	-0.455806	-0.33035	-0.420508	-0.20181	0.0391162	0.885799	0.891318	-0.273794	0.265019	-0.149868
O95831	-0.168085	-0.331322	-0.0669629	0.499019	-0.228666	0.0650958	0.0567191	0.124235	-0.0862966	-0.0265001	0.168062	0.107985	0.18339	-0.240622	-0.0560506
Q04637	-0.291479	0.457012	0.169131	-0.49542	0.330974	0.0654358	0.0446707	0.220082	0.373343	-0.118556	-0.1671	-0.658244	-0.374473	0.328737	0.115888
Q13362	0.101065	-0.0716558	-0.0912103	0.0373926	0.0550099	0.01272	0.0214451	-0.0393939	-0.0516636	0.025816	0.0582606	0.0174685	0.035332	-0.0775483	-0.0330381
Q07954	-0.107924	-0.161658	-0.0766923	0.0105195	-0.0506939	0.123737	-0.040441	0.109628	-0.00931634	0.0156053	0.0236243	0.358352	-0.00656734	-0.108317	-0.0798555
Q9UIA9	-0.141534	0.0603429	0.034616	-0.17202	0.0106656	0.0650451	0.0708419	0.0387838	0.00223848	-0.0916545	0.0886155	0.0673065	-0.120339	0.0887434	-0.00165168
Q14978	-0.219062	-0.0197841	0.251658	-0.256279	0.155298	0.112306	0.0725861	0.102911	0.151105	0.0557428	-0.0616818	-0.238202	-0.246127	-0.0459446	0.185473
P61201	0.105178	0.115113	-0.0299983	-0.142719	0.00889541	0.103434	0.00448203	0.104848	0.0598771	-0.0207686	0.0806568	-0.222954	-0.0870229	0.0592975	-0.138319
Q6Y7W6	0.0552714	0.101882	-0.0581565	-0.228412	0.0208763	0.152488	-0.0592606	-0.0288968	-0.0700801	-0.0293421	-0.0689216	0.0573695	0.13913	-0.0282857	0.0443391
P55084	-0.440835	-0.400583	-0.466795	0.821158	-0.191861	0.0191174	-0.0513555	0.0822684	0.0811774	0.164473	0.0186726	0.296929	0.26459	-0.318343	0.121385
P05187	0.440806	-0.262679	-0.477146	0.991299	0.310211	-0.104285	-0.0914317	-0.15969	-0.0832857	-0.395285	-0.82981	0.0672021	0.19924	0.015385	0.379469
Q9BUE6	0.0104993	-0.111645	0.0264037	0.0398506	-0.00848849	0.0449455	0.0119706	0.00750009	0.021836	0.0374471	-0.000552109	0.0477136	0.00885912	-0.0705833	-0.0657566
Q9H6S0	-0.0741917	-0.0447215	-0.0145486	0.0883784	-0.0576603	0.0367421	-0.0165356	-0.030647	0.0279058	-0.0411414	0.0654425	0.0277627	0.0337016	-0.0247837	0.0242966
Q9BUF5	0.137987	0.205773	0.0954955	-0.184118	0.0872605	0.016395	-0.0127444	0.00266314	-0.150383	-0.015864	-0.0895746	-0.00767369	0.0125641	0.0713333	-0.169114
Q8TAA9	-0.105199	-0.130877	0.0159784	0.0335169	-0.0447409	0.0530772	0.0112212	0.00451803	-0.000526538	0.00085258	-0.0331328	0.00211347	0.053415	0.0672889	0.0724946
P54886	-0.24548	-0.472104	-0.0359154	0.302859	-0.154292	-0.0113747	-0.12148	0.312497	-0.0216789	-0.0275937	0.4073	0.0918467	0.143268	-0.266033	0.0981801
A1L0T0	0.151549	-0.230521	-0.0107965	0.198721	0.088447	-0.0389493	-0.0953566	-0.0235701	-0.233189	0.0170938	0.0283496	0.206453	-0.0110035	-0.043087	-0.00414106
Q14534	0.0505381	0.016513	0.0899603	0.0174784	-0.077486	-0.0846679	-0.0301911	-0.140583	-0.0789941	-0.00584931	0.0842575	0.00749425	0.262509	-0.0900924	-0.0208874
P02792	0.0454154	0.00124323	-0.138256	0.218373	0.0287822	0.0459948	-0.036351	-0.167349	-0.0966745	-0.13717	-0.13892	0.131233	0.17531	0.0163139	0.0520547
Q16891	-0.457212	-0.694311	-0.11231	0.581816	-0.342928	0.110605	-0.0340606	0.153513	0.167807	0.125437	0.0854257	0.267747	0.175022	-0.323451	0.2969
P35222	0.145748	-0.432578	-0.0783335	0.361958	0.00278617	-0.18883	-0.264797	-0.108821	-0.124351	-0.165622	0.181742	0.283073	0.155155	-0.0125761	0.245445
O60725	0.0262192	-0.103733	-0.0664691	0.0151873	-0.066822	-0.00252722	0.017885	-0.013109	0.0341666	0.0168288	0.0076452	0.0762143	0.00269467	0.0396041	0.016215
Q96G03	-0.105275	0.0972487	0.115076	-0.125959	0.0507012	-0.0369621	0.0605126	0.00625572	-0.0828516	0.0469148	-0.0798554	0.00376135	0.010215	0.00485563	0.0353616
P14923	0.365422	-0.192602	-0.00940722	0.437991	0.0657987	-0.429617	-0.156934	0.0238405	-0.362936	-0.177074	0.195568	0.0633593	0.064051	-0.0397994	0.152338
Q9BTW9	0.0100268	0.0466036	-0.0391307	-0.0406728	-0.00677022	-0.0568321	-0.0168182	-0.0520105	-0.0117297	0.0266685	-0.122925	-0.0291842	-0.0183278	0.195384	0.115718
Q8NE71	0.0816538	0.367463	0.0979249	-0.265759	0.159082	-0.124728	-0.0508351	-0.0117972	-0.0630628	0.0527435	0.0265648	-0.227486	-0.127448	0.0854007	0.000282714
Q9NYL9	0.0753525	0.0809466	-0.155719	0.204454	-0.084501	-0.0412474	0.0887959	-0.0140435	0.0679518	-0.0122767	0.0111728	-0.0154272	0.234967	-0.0317987	-0.408627
O60449	0.0362842	-0.0673286	0.0243339	-0.127772	0.00419821	-0.0278909	-0.0102977	-0.0888534	0.00412265	0.0141048	0.0781667	0.0808663	0.0462395	-0.0276775	0.0615038
Q86V48	-0.132699	0.101231	-0.0101799	-0.145542	-0.000819768	-0.0109745	-0.121243	-0.101591	-0.0190842	-0.0385784	0.0720639	0.0809778	-0.00167681	0.137265	0.190851
P25787	0.192106	0.311214	0.0043988	-0.182374	0.114703	-0.184412	-0.113699	0.014465	-0.0874653	0.0266075	0.0833105	-0.0685433	-0.0185076	0.0229186	-0.114722
P06239	0.0160194	0.081771	0.039726	-0.0654172	0.0398322	0.0347554	-0.0217939	-0.0142424	-0.0804181	0.0437879	-0.0636636	0.0258672	0.0455678	0.0205967	-0.102388
P05062	-0.124688	0.167832	-0.0239218	-0.0357083	0.104225	-0.0251956	0.0733059	-0.0426066	0.0654012	0.0405931	-0.0244757	-0.0472276	-0.0731236	-0.0250011	-0.0294092
Q8WXI9	0.00276621	0.111095	-0.0770797	-0.075656	-0.0744749	0.0666265	0.0477944	-0.040654	0.0761872	-0.0908099	-0.0704953	-0.024647	-0.0743449	0.0434052	0.180288
P46063	0.171816	0.198015	-0.10449	-0.262982	0.0982051	0.00875996	-0.0333497	0.0233125	0.0759774	0.0356499	-0.0803467	-0.141704	0.0279691	0.133971	-0.150802
P08574	-0.0475419	-0.320912	-0.105887	0.018685	-0.182904	0.0780534	0.0542832	-0.0282339	0.0335877	0.08032	-0.200485	0.338222	0.378498	-0.167246	0.0715602
Q9BV44	-0.0705191	-0.0929498	0.0849432	0.062828	0.0580168	0.0363259	0.0398569	0.0359927	0.0739973	0.0709387	0.0385453	-0.103434	-0.115519	-0.00143028	-0.117593
Q8IY81	0.0595976	-0.152835	0.0229183	-0.0292575	-0.107428	0.0455077	-0.0144266	0.0580007	-0.114035	-0.0860894	0.0811494	0.0341539	0.319796	-0.242923	0.125871
Q9Y4L1	0.0598455	-0.39694	-0.0286294	0.771248	-0.586247	0.104571	0.0453927	0.111455	0.0523049	0.0861084	0.040279	0.264223	0.0767545	-0.112381	-0.487985
P50750	0.0300597	0.0524531	0.017054	-0.139464	0.00555846	-0.0251613	-0.108301	0.134199	0.00345301	-0.0632765	-0.00154368	0.00271373	-0.00181054	0.135063	-0.040998
Q9Y6E0	0.132227	-0.135388	-0.133115	0.0898877	0.014835	-0.0082617	0.0460202	-0.170999	0.0265724	0.0647585	-0.0103837	0.0610397	0.0368609	-0.0593692	0.0453153
Q5JWF2	-0.0219772	-0.202958	-0.159644	0.261335	-0.0561698	0.0314961	-0.0107162	0.0801864	0.0667768	0.13042	-0.10405	0.071394	0.0212814	-0.126301	0.018926
P07948	0.0600964	0.0302198	0.0523654	-0.108461	-0.0060585	-0.000373913	0.0725434	-0.0478423	0.0107176	-0.0362385	-0.0719185	0.0887759	0.09785	-0.0429814	-0.0986944
O75489	-0.00890759	-0.161702	-0.105654	0.378199	-0.0852186	-0.107075	-0.0937459	-0.00751462	-0.114242	-0.0724572	0.159793	0.233295	0.243773	-0.176779	-0.081765
P17676	-0.105018	-0.0126281	-0.0706404	-0.00261456	-0.0726908	0.00611872	0.089031	0.0607043	0.096676	0.0111187	0.0289842	0.00133826	-0.0142008	0.0377448	-0.0539227
Q86Y37	-0.0680843	0.0424692	0.142593	-0.0501749	0.0693562	0.076503	0.108368	0.0887657	0.126601	0.0509638	-0.0571878	-0.19184	-0.539619	0.147283	0.0540034
Q8NF37	-0.0782011	-0.172777	0.0858021	0.0188198	-0.0648242	-0.0743609	-0.00548924	-0.056349	-0.0120031	0.00273569	0.265513	0.148075	0.133312	-0.158968	-0.0312847
Q9UKV3	-0.109102	-0.224327	0.066543	0.207787	0.0456127	0.157869	0.109241	-0.00979391	-0.0593724	-0.0555446	-0.165033	-0.135379	-0.0331438	0.095467	0.109176
Q96GQ7	-0.113689	-0.247342	0.13619	-0.105453	-0.222218	0.00441436	0.0531126	-0.0641332	-0.0675687	-0.00830818	0.43248	0.222963	0.250126	-0.284717	0.0141427
Q9Y639	-0.0849924	-0.0970734	-0.0346616	0.357404	0.0107802	0.00194711	-0.0269415	-0.0281263	0.0493641	0.00283724	-0.0721958	0.0300048	0.00889115	-0.157947	0.0407095
Q96TA1	0.110409	0.26835	0.0197826	-0.171038	0.103669	0.00530759	0.017037	0.0740472	-0.0425012	0.0208477	-0.30296	-0.0471305	-0.136678	0.213378	-0.132521
Q92947	-0.0322525	-0.035717	-0.0752493	0.22442	-0.131962	-0.0474135	-0.085541	-0.00402564	0.0170261	0.00950793	0.101016	0.227607	0.124833	-0.108858	-0.183391
Q15181	0.0324178	0.450809	0.0399011	-0.260628	0.108331	0.0298989	0.0532306	0.028112	-0.047214	0.0202048	-0.220738	-0.0797196	-0.100379	0.0156145	-0.0698402
Q15233	-0.405598	-0.732604	-0.113767	-0.416096	-0.2113	0.00258307	-0.051319	0.0677627	0.048699	0.0576277	1.06699	0.103344	0.278047	-0.131183	0.436818
P35658	-0.0307387	0.128815	0.0133008	-0.20711	-0.127012	0.0428714	0.0961849	-0.0152312	0.124279	0.00459449	-0.138539	-0.0551514	-0.150704	0.20794	0.106502
Q92610	-0.0744057	0.0870102	-0.0296054	-0.0245338	-0.0103501	0.0271918	-0.0144848	-0.0161185	0.0102251	0.0190308	0.012103	0.0328692	-0.0266916	-0.00422591	0.0119858
Q5T6F2	0.0345867	0.141015	0.0436608	-0.21789	0.0527142	0.0175735	0.0341452	-0.0991244	-0.00234558	-0.0183922	0.0644213	-0.0427047	0.0113392	-0.0625074	0.0435076
Q7L2J0	0.0823667	0.0703924	0.136767	-0.0784354	-0.0802013	-0.126543	-0.141017	0.0540931	-0.0414587	0.00691158	0.171954	-0.137204	0.117697	0.00933624	-0.0446568
P38435	0.0970257	-0.0911894	-0.0526419	0.0590399	0.0100053	-0.0641979	0.0194777	-0.0113329	0.019629	-0.00840398	-0.0569085	0.060928	0.0026925	-0.0403671	0.0562438
O75694	0.220731	-0.220269	0.0284502	-0.163898	0.0697606	-0.03185	-0.0755591	-0.126484	-0.189488	-0.0998115	0.193655	0.302202	-0.00594132	-0.00504994	0.103553
Q96CF2	-0.0631659	-0.00976572	0.0287091	0.0086934	0.0280826	0.0111533	0.00140784	-0.0163501	0.0374514	0.00939568	-0.122072	0.0455986	-0.0394453	0.0461657	0.0341414
O95817	0.0721548	0.069754	0.000724433	-0.111848	-0.122526	0.0697407	0.0328951	-0.00715055	0.075049	-0.181901	-0.0763807	0.0733762	0.0323364	0.0281037	0.0456718
P18583	-0.15532	0.0856523	-0.0174526	-0.249229	0.0109691	0.0665902	-0.146707	-0.0435283	-0.0706129	0.0649499	-0.109086	0.116815	0.183784	0.0300888	0.233087
Q9NR12	-0.0533795	0.142411	-0.00794372	-0.34928	0.191886	-0.200881	-0.121399	-0.0668796	0.0651131	0.0331693	0.27859	-0.25982	0.00941319	0.040939	0.298062
P37837	0.116048	0.544636	-0.0975704	-0.495307	0.447771	0.0780899	0.109966	0.117585	0.0498201	-0.0148647	-0.423812	-0.370417	-0.270933	0.37402	-0.165031
P08651	0.000402921	0.0182946	-0.0136886	0.032656	-0.0356476	-0.0356941	-0.0311602	-0.0573567	0.0445145	-0.0372282	0.00651482	0.0492907	0.0496431	0.00218486	0.00727386
P62995	-0.186462	-0.136246	0.0274166	0.30109	-0.139159	-0.0191493	0.0556746	-0.0743787	-0.0349128	-0.111641	-0.142847	0.0732974	0.189359	0.0895753	0.108382
O75351	0.0516782	0.188071	-0.0258479	-0.0750234	0.096048	-0.0717162	-0.0418014	0.0181842	0.0023287	-0.0761137	-0.0545958	-0.0236526	0.0233784	-0.0296305	0.0186927
P04075	0.042995	0.436204	0.246303	-1.16065	1.12447	0.155295	-0.0181422	0.0466619	0.220348	0.149843	-0.558333	-0.577393	-0.402327	0.454965	-0.160242
Q9Y2D5	-0.0569911	-0.0723239	0.0234597	-0.139427	-0.0946793	-0.0375721	0.0519803	-0.00342698	0.0870899	-0.0813278	0.0900687	-0.0068418	0.0139597	0.0966586	0.129373
Q9NW08	-0.0409992	-0.0297537	0.150597	-0.0397222	0.00981168	-0.0460713	-0.0110033	-0.0323064	-0.0323227	-0.0292069	-0.0183965	0.0571963	0.106732	-0.0177473	-0.0268078
Q5JTH9	0.114412	-0.0008645	0.132104	-0.356117	0.0268191	0.000370495	-0.0104134	0.119164	0.131721	0.0644001	0.13566	0.0686013	-0.198394	-0.319383	0.0919201
Q13952	-0.0591352	-0.0791307	-0.0610612	-0.0147276	0.133105	0.10946	-0.0587026	0.0639255	-0.00540818	-0.0405373	-0.0100262	-0.0142554	-0.0317311	0.104935	-0.0367097
P04040	0.0284787	-0.248724	-0.0742617	0.188553	-0.119714	0.0147859	0.0191847	0.0760781	-0.102977	0.0456055	0.298012	-0.0101187	-0.0496069	-0.146055	0.0807605
Q2TB90	0.114143	-0.161176	0.0565669	-0.0715657	-0.0905981	-0.105697	0.0194276	0.0226113	0.038317	-0.094854	-0.0117026	0.0388004	0.151596	0.0956135	-0.00148213
P19367	-0.0676138	-0.393152	0.086422	0.130179	-0.193339	-0.169464	0.193921	-0.207363	-0.125017	-0.00977457	0.299238	0.167685	-0.0242296	0.168857	0.14365
P52789	-0.180519	-0.0300688	0.193251	-0.318454	-0.288183	0.179677	0.0579698	-0.0253256	0.128536	0.160424	0.294674	-0.13675	-0.002331	-0.0935279	0.0606279
Q9UKU7	-0.10065	-0.028111	0.0216964	0.174146	-0.10893	-0.0122486	0.060948	0.122813	0.0944607	0.00881768	0.0354423	-0.0615641	0.00589627	-0.110409	-0.102307
P09622	-0.182088	-0.155168	0.1051	0.917728	-0.359327	0.0210239	-0.0704917	-0.0703667	-0.0819651	-0.0662386	-0.11585	-0.0172278	0.110891	0.11291	-0.14893
Q9NZL4	0.0696841	0.266607	0.0241973	-0.31743	0.149568	0.0749	0.00672247	-0.0752815	-0.12517	0.0155136	-0.118171	-0.0155935	-0.0206257	0.131928	-0.0668492
Q969V3	0.016392	-0.134745	0.0746733	0.237963	-0.128373	-0.266227	-0.0850211	-0.0169931	0.0249127	0.0354009	0.200216	-0.210219	0.213865	0.0128709	0.025285
Q13488	0.0892127	-0.0551246	-0.115976	-0.0424313	0.0477727	0.0438077	-0.027573	-0.0411485	0.0285148	0.0239662	0.022695	0.069108	0.0315348	0.00520161	-0.0795598
P07942	0.149127	-0.264932	-0.233582	0.123716	-0.0696639	-0.0419851	0.0749974	-0.0439789	-0.184217	0.0178551	0.0496563	0.161841	0.0281425	0.0298608	0.203164
P48729	-0.00892221	-0.00303854	-0.0232421	-0.254574	0.0479986	0.111612	0.0294597	-0.161362	-0.0377662	-0.0398443	0.250417	0.0762691	-0.115894	0.0520765	0.0768113
Q96A26	-0.0999436	-0.0924865	-0.0498656	0.0290153	-0.124252	0.0691954	0.0584012	0.0512364	0.0264682	0.0123407	0.151981	-0.0274705	0.0546775	-0.15415	0.094852
P35914	0.0680928	-0.0957206	0.0397875	-0.0944955	0.0208338	0.190242	0.0326504	0.0665169	0.0585266	-0.146301	-0.283416	0.0676145	0.0958443	-0.0148621	-0.00531295
Q8TDY2	0.051633	-0.000974143	0.106408	-0.149065	0.046256	0.0619686	0.0379021	-0.0100508	0.0403783	0.0698674	0.0842187	-0.00422794	-0.0315744	-0.160033	-0.142706
P46459	0.144475	-0.244462	-0.060715	-0.23642	0.292159	0.126564	0.0405127	-0.0373342	0.0538662	0.211764	-0.0463113	-0.141022	-0.15161	-0.319259	0.367794
Q15642	-0.0211156	-0.00233218	-0.0347854	0.442599	-0.0124503	-0.0256071	-0.0394676	-0.0414451	-0.0392026	-0.0565362	-0.0401811	-0.0328543	-0.0219585	-0.0336437	-0.0410189
Q96I24	0.00149706	0.0265625	-0.0249388	0.0883794	-0.201228	-0.146344	-0.0589239	0.123057	-0.0477659	0.0545329	0.320378	-0.10552	0.000833851	-0.231127	0.200606
P01023	-0.0501121	-0.0850574	-0.0744261	-0.0810546	0.584121	-0.0829018	-0.0545641	0.0385617	-0.0453612	-0.0187161	-0.0370854	-0.0389838	0.082017	-0.0340049	-0.102432
Q9NR56	0.125833	0.0934559	-0.0256091	-0.111244	0.0502511	-0.0432788	-0.0434081	-0.0655756	-0.0656389	-0.0331856	0.00378307	0.0135978	0.0124557	0.0656512	0.0229116
Q9NZT2	0.0558546	0.143473	-0.0252811	-0.127578	0.081216	-0.0324232	-0.046883	0.0262238	0.0508355	-0.033584	0.00939213	-0.178322	0.000212669	0.0431333	0.0337302
Q03252	-0.244862	-0.89723	-0.0889884	0.868775	-0.368399	0.135191	0.120206	0.111175	0.250879	0.100182	-0.0973448	0.0523578	0.0249435	-0.116593	0.149709
O00116	-0.0917951	-0.267247	-0.11724	0.199907	-0.131032	0.0395504	0.0280889	0.0250167	0.00396171	0.0787982	0.278671	0.134398	0.121936	-0.279175	-0.0238385
O75367	-0.198027	-0.231638	-0.393962	0.634056	-0.0904464	0.0748589	0.0617462	0.0922941	0.0238311	0.124973	-0.384914	0.582728	0.249545	-0.551348	0.00630332
O00154	0.100311	0.261635	0.0493679	-0.340017	0.14107	0.154325	-0.0747296	0.0874878	-0.0665005	-0.0201387	-0.209014	0.014765	-0.0632647	-0.0400791	0.00478084
Q96HY6	-0.160808	-0.0408065	-0.00325413	0.11837	-0.00305202	0.00205066	-0.0242575	-0.162567	0.0551392	-0.0111993	0.110344	0.0651233	-0.0828203	0.0447325	0.0930052
Q9BSJ2	0.00233625	0.034591	-0.00598689	-0.0265225	-0.027354	-0.0468411	-0.16445	-0.0934346	0.0527002	0.0560288	-0.0521456	0.152633	0.0201811	0.0516896	0.0465743
Q16787	-0.0141784	-0.109931	-0.132648	0.0200668	0.0472681	-0.0421868	0.049986	-0.00548564	-0.0324662	0.027276	0.121624	-0.0265319	0.0795482	-0.0154969	0.0331562
O14976	-0.0922833	0.0389898	-0.0484725	-0.0840896	0.0505783	0.0414559	0.0773351	-0.00908077	0.00111868	0.063314	-0.0201732	-0.0313027	0.0181521	0.0639456	-0.0694873
P13861	0.0303271	0.200458	-0.132889	0.0189937	-0.0158629	-0.0569435	-0.00917568	-0.059408	0.0106913	0.0845829	0.0847442	0.105401	-0.0542639	-0.0174138	-0.189241
Q96JM3	0.112233	-0.0304903	0.0103556	0.106124	-0.0121473	-0.0442727	-0.0448674	-0.111985	-0.102209	-0.00610455	0.0802991	0.105158	0.00538416	-0.0109531	-0.0565255
P85037	-0.0532956	-0.018468	-0.0175789	0.0957345	-0.0173738	-0.076913	-0.00247837	-0.0251732	-0.0365575	-0.0324012	-0.0153013	0.0635356	0.0709041	0.063717	0.00164954
P09525	-0.114852	0.0701444	-0.195646	-0.212731	0.179007	0.196923	0.182366	0.227849	0.251076	0.130632	-0.117203	-0.303646	-0.192741	0.0366541	-0.137833
Q96CM8	0.0426279	-0.217838	-0.264769	0.134225	-0.0103173	-0.027798	0.0362535	0.10727	0.0360483	0.037417	-0.084168	0.0404566	0.0813103	-0.0671825	0.156464
P26640	0.115275	0.340122	0.244864	-0.40821	0.19695	-0.122317	-0.0045553	0.0631484	-0.00482076	-0.00388925	-0.154342	-0.43576	-0.150807	0.265584	0.0587577
Q12959	-0.0703509	-0.115648	0.0304264	0.172424	0.0413963	-0.116627	-0.0130274	-0.042826	-0.0492266	0.101003	0.114576	0.132044	-0.0601555	-0.0279771	-0.0960305
Q8TEQ6	-0.0408122	0.224103	0.179865	-0.149723	-0.0803209	0.0550128	-0.0407026	0.122435	0.00852405	0.0357253	0.149131	-0.11224	-0.15302	0.000672082	-0.19865
P23588	0.0173074	0.151251	0.114403	-0.131619	-0.123358	-0.01647	0.125633	0.106177	0.122981	-0.00813149	0.0220686	-0.234331	-0.0765223	-0.155711	0.0863197
A8MXV4	-0.15493	-0.153883	0.0770885	0.128452	-0.133888	0.0991707	-0.0751839	-0.0396746	0.0113054	0.0773439	0.118662	0.144628	0.00753818	-0.0664164	-0.0402122
Q92538	-0.0591828	0.0739502	-0.136893	0.00564359	0.0716154	0.138468	-0.103569	-0.0227248	0.00834669	-0.0351311	-0.0370436	0.0910385	-0.0321807	-0.00969802	0.0473607
Q08378	-0.0543098	-0.0675714	0.00421642	-0.0849622	-0.0119785	0.0419322	0.0887993	0.044644	0.0414793	0.140585	0.00768597	0.0811409	-0.125533	-0.00983388	-0.0962938
Q96N66	-0.231747	-0.452274	-0.126323	0.137282	-0.0342932	0.120952	0.0798115	0.0976754	0.04663	0.120293	0.0681642	0.213767	0.0299107	-0.160083	0.0902361
P11182	-0.104833	-0.136725	0.210134	0.405642	-0.191473	0.0195919	-0.0493642	-0.0792297	0.050479	0.0431569	-0.038067	-0.0272338	-0.138349	-0.0973561	0.133628
O14521	0.0793852	-0.0193561	-0.341647	0.0242221	-0.00359348	0.00381482	0.0392054	-0.000362538	-0.0505391	0.0107113	0.094811	0.0499502	0.0960777	-0.0434934	0.0608144
P52948	0.146052	-0.0941184	-0.132927	-0.0996023	-0.305759	0.110346	0.166451	-0.0562228	0.130729	-0.0272012	-0.157613	0.496044	-0.0438428	-0.0395961	-0.0927392
Q27J81	0.190846	-0.265658	-0.0073652	0.197367	0.0431607	0.0316747	-0.00406656	0.0295084	-0.219016	-0.0839762	-0.0618886	0.0670829	0.0667137	0.138776	-0.123158
A2RRP1	0.0282839	0.00768628	-0.00960972	0.0313064	0.0341884	-0.0425957	-0.156822	-0.0607678	-0.0277408	0.0140417	0.00540675	0.09004	0.0556132	0.0411785	-0.0102088
Q02880	0.178932	-0.199404	-0.107404	0.25435	-0.0710812	-0.0471353	-0.214984	-0.0645228	-0.0520099	0.026072	0.0227172	0.103225	0.151172	-0.0069753	0.0270486
Q9UHL4	0.0896132	-0.16005	-0.08718	0.178424	0.00375924	-0.105303	0.0159381	-0.032783	-0.0246119	0.0856848	-0.294765	0.0223107	0.0614282	0.14792	0.099616
P51948	-0.0351545	-0.0504939	0.0594352	0.0697307	-0.065523	-0.00232144	0.031465	0.0283255	0.0566807	0.034844	-0.0446319	-0.0777511	-0.03483	0.00924829	0.0209764
Q9NZM1	-0.0587329	-0.848417	0.0248916	0.0230968	-0.508759	0.244127	0.00412261	-0.18915	0.0102369	0.224484	0.227572	0.524384	0.413426	-0.124824	0.0335414
O15127	-0.0314202	-0.0363064	-0.058824	0.0365716	-0.0256339	0.0172418	-0.0492588	-0.0358958	0.0115285	0.0118937	0.198122	-0.0173794	-0.0218789	-0.00750993	0.00874952
Q8TBA6	-0.010133	-0.027577	-0.0418704	0.115433	-0.0515694	0.0581038	0.0486833	0.0470656	-0.0234875	0.0724313	-0.0209846	0.0478576	-0.109869	-0.0736478	-0.0304356
Q9Y446	0.0361797	-0.216108	-0.205737	-0.2227	0.331714	-0.0320244	-0.0498464	0.125458	-0.0802732	-0.0683955	-0.0192763	-0.0209191	-0.027474	-0.0150858	0.464488
O95071	0.0934413	-0.0497607	-0.0203258	-0.0927675	-0.139257	-0.0907158	-0.0527903	0.00471704	0.0405167	-0.0193531	-0.124759	0.192683	0.249137	-0.159705	0.168939
Q9H269	0.108642	0.0820162	0.0210394	-0.103703	-0.00339533	-0.0598146	-0.0813407	0.0246358	0.0139691	0.0604834	-0.0607293	0.0486233	-0.0664853	0.0442161	-0.0281572
O60885	0.200127	-0.0922628	0.0582035	-0.0212015	-0.0305234	0.00305785	0.0848441	0.0644294	0.0118258	-0.015043	-0.0279509	-0.239517	0.0321077	-0.0406173	0.0125207
Q14126	0.219957	-0.301331	-0.381849	0.0657886	0.0333504	0.04181	-0.169733	-0.0918842	-0.200552	0.205226	-0.0121858	0.258253	0.357198	-0.271162	0.247114
Q9Y3F4	-0.112575	0.434644	0.235946	-0.352097	0.025905	-0.0323709	-0.0132596	0.0786594	-0.101787	0.0472975	0.0716031	-0.219506	-0.0132751	0.0266564	-0.0758411
Q96B36	0.0447922	0.0808073	-0.0100662	-0.052409	0.0380898	0.00196057	0.0177247	-0.0095643	0.0219136	0.023069	0.00519773	-0.211335	-0.00184716	0.012836	0.0388309
Q9UJA5	-0.0351042	0.245546	0.0215207	-0.0831342	-0.025438	0.0502355	-0.0196334	-0.0914221	-0.10037	0.062675	0.0364064	-0.0762964	-0.0872875	0.191652	-0.0893493
Q15084	-0.0866155	-0.539366	-0.100684	0.90578	-0.709272	-0.0959816	-0.00745558	0.0193146	-0.035729	-0.0709523	0.604684	0.563621	0.472141	-0.603947	-0.315537
Q13263	0.666654	-0.79163	0.465284	0.108666	-0.650002	0.12673	0.137619	-0.0273489	-0.128145	-0.0955855	0.209061	-0.082101	-0.0891082	0.488602	-0.338694
Q8WUF5	0.0210367	0.0399442	-0.192927	-0.200994	0.309732	0.0171288	0.10689	0.09541	-0.108591	0.0323054	-0.00750298	-0.148176	0.0852892	-0.0301373	-0.0194077
Q6WCQ1	-0.341863	-0.223493	-0.15639	0.441884	-0.196391	0.067917	-0.114384	0.128873	-0.0439502	0.131236	0.382911	0.246293	0.160168	-0.506846	0.0240361
Q9HCC0	-0.258225	-0.225903	-0.0218104	0.253484	-0.112856	0.0322409	0.00810824	0.0993328	0.112874	0.0435745	-0.148011	-0.0435389	0.218484	-0.105115	0.147361
Q02952	0.0711127	0.125541	0.0839635	0.000500379	-0.155748	-0.0842598	0.151788	0.0118071	-0.00527696	-0.136033	0.171546	-0.0709084	0.0834455	-0.0510734	-0.196405
Q53GS7	0.0190774	-0.10987	-0.0697821	-0.057666	0.185418	0.0486796	-0.0806743	-0.00334508	0.0443078	-0.0376306	0.0167912	-0.00583016	0.00867151	0.0352695	0.00658326
Q9Y4I1	0.0633202	-0.0415268	0.0314387	-0.0823649	0.00931688	-0.0123153	0.00553056	-0.0952309	-0.0699094	-0.0417702	-0.00374961	0.134384	0.080198	-0.00491425	0.0275928
P50454	-0.138564	-0.77209	-0.211875	0.971018	-0.292712	0.0997002	0.0422763	0.0316468	-0.172414	-0.155061	-0.0281616	0.412393	0.216494	-0.035812	0.0331619
Q14683	0.273544	0.0495956	-0.120182	0.195861	-0.484178	-0.406126	0.0996817	0.15669	-0.470225	0.123847	-0.0669932	0.233076	0.0359817	0.350443	0.0289836
P57740	-0.0226539	-0.144198	-0.113278	-0.131887	-0.0347973	0.0453026	-0.0554292	-0.0399332	-0.126285	0.0330224	0.147991	0.141774	0.41815	0.0229749	-0.140754
P08708	0.189759	0.0791947	0.177311	-0.343395	0.0846433	0.0473968	0.0044703	-0.0176255	-0.121536	-0.154082	0.128654	-0.329825	-0.0655043	0.24074	0.0797995
Q6PD74	0.0476086	0.0143306	0.0192803	0.0183913	0.013337	0.0119349	-0.0240069	0.0397979	0.0148366	-0.0266416	-0.115263	0.0494218	-0.100781	0.027799	0.0099545
Q13895	0.0526653	0.00795582	0.0770499	-0.110247	-0.064201	-0.0595451	-0.116386	0.0641911	-0.171808	-0.0673733	0.11661	0.0285409	0.299349	-0.0155972	-0.0412045
Q96GG9	0.251423	0.259836	-0.0448693	-0.107631	-0.0827268	-0.0562101	-0.0509301	-0.040315	-0.0525644	-0.0768089	-0.0753249	-0.0731855	0.291173	-0.0347653	-0.107101
P13667	-0.410966	-0.693778	-0.486856	0.987355	-0.488804	0.271248	0.308919	0.351042	0.228909	0.313735	-0.232445	0.0734607	0.0627401	-0.149036	-0.135523
P80303	0.232796	-0.0294646	-0.00719366	0.084486	-0.125816	0.0429778	0.0283386	-0.0970818	0.00197742	0.0374553	0.118034	-0.00121761	0.0207176	-0.095619	-0.21039
Q9NR77	0.01179	-0.0130945	0.0459945	0.0137349	-0.0194863	-0.00861153	-0.00263455	-0.0147927	-0.0113172	-0.0117646	-0.00906934	0.0263423	-0.0216369	0.0279919	-0.0134461
Q86X29	0.0326764	-0.194826	-0.0113642	0.0411535	-0.0482712	0.101248	0.0536595	0.00100052	0.00671883	0.0417225	0.100755	-0.0375588	-0.0700435	0.0119628	-0.0288328
Q14204	0.120453	0.775681	0.00398731	-0.932707	0.350524	-0.234237	-0.13611	-0.184165	0.174848	0.0242533	-0.0895897	-0.180864	0.140223	0.344936	-0.177232
P13611	-0.370558	-0.0746538	0.0693996	0.24666	0.0955499	0.119994	0.12942	0.1691	0.166862	0.0229614	-0.378578	-0.384189	-0.0105906	0.106829	0.0917946
Q8N128	-0.118383	0.00751581	0.0106968	0.0306066	-0.0126162	-0.0493999	-0.0492424	0.0114475	0.0194599	-0.0205253	0.0581982	0.0518629	0.0591981	-0.00862776	0.00980892
Q9BXK5	-0.053724	-0.114611	-0.0546581	0.111703	0.0632348	0.016169	0.00460535	0.0300248	-0.0739084	0.0125868	-0.111122	-0.0108446	0.116935	-0.0600693	0.123679
Q15436	0.0969999	0.159442	-0.0915422	-0.0986087	0.0457145	-0.0799403	0.0437177	-0.00788916	0.100103	-0.102522	-0.0844071	-0.0468099	-0.230916	0.167109	0.129549
Q96BP3	0.0165593	0.0523937	0.0595344	-0.121496	-0.166762	-0.0267736	-0.0627132	-0.0116277	-0.00337814	0.0246771	0.0214581	-0.0382062	0.131074	0.0730132	0.052247
Q9BQ39	0.0429769	-0.141826	-0.0279039	-0.281987	0.0169024	-0.0272834	-0.0567056	-0.0528036	-0.0142372	-0.0343882	0.165014	0.248002	0.123177	-0.0144146	0.0554769
Q15582	-0.00535472	-0.15504	-0.124351	-0.102046	0.0690984	0.0104932	-0.0245947	-0.0311026	0.0241436	0.0568216	0.0486549	0.056816	0.0143749	-0.065703	0.22779
Q6Y1H2	0.0995187	-0.056346	0.0102188	0.0464897	-0.0115663	-0.0137901	0.0176148	0.0220798	0.0216768	0.0174087	0.0787283	0.00829684	-0.15724	-0.052591	-0.0304997
P07910	-0.0376078	-0.697673	-0.511294	0.799189	-0.249604	0.339981	-0.228311	0.419153	-0.663816	0.518732	-0.0266158	0.276219	0.640271	-0.282356	-0.296266
P22314	0.265953	0.49734	0.0630496	-0.584641	0.361719	0.0604728	-0.0279299	0.0811019	-0.0656155	0.0719508	-0.29148	-0.169929	-0.240154	0.086774	-0.108612
Q9Y3T9	-0.00949622	-0.308839	0.14503	0.031247	-0.0395935	-0.0407974	0.0427797	-0.0417993	0.0631553	0.0836202	-0.0685945	0.109184	-0.114435	0.0429978	0.10554
O75152	0.0900221	-0.027304	0.0852701	-0.0764547	0.0961006	0.0261812	-0.166909	-0.0820258	-0.0343349	0.0692252	-0.260119	0.0257888	0.110381	0.0231756	0.121002
Q96F86	0.102501	-0.0624716	-0.0360767	0.00521555	-0.0988903	0.0104656	0.0128478	-0.0392779	-0.070147	0.0101404	0.0618905	0.0957785	0.0349736	-0.0210016	-0.00594828
P13804	-0.201348	-0.441035	-0.300974	0.783249	-0.370458	0.0450009	-0.00735966	0.0418102	0.0396939	0.0154229	0.255625	0.157853	0.251355	-0.303149	0.0343137
Q13155	0.124156	-0.172126	0.123532	-0.290419	0.0967557	-0.219426	0.0891152	-0.021733	0.0251053	0.0144113	0.0318629	-0.117988	-0.0131755	0.326065	0.00386442
P31153	0.165734	0.259395	-0.0181857	-0.307287	0.140821	-0.00364536	0.0444161	0.087415	0.0405049	0.0786241	-0.120407	-0.1933	-0.201672	0.140858	-0.113271
Q92599	-0.0887382	0.137513	-0.161462	-0.180257	0.0351062	0.0272299	0.0384631	0.0287677	0.000934709	0.0466011	-0.0919794	-0.00416498	-0.0309816	0.235105	0.00786256
P36957	-0.182003	-0.298609	-0.318568	0.467263	-0.313772	0.0849449	0.0994585	0.0550514	0.0447424	-0.0154109	0.160628	0.270447	0.384187	-0.360839	-0.0775194
Q5VTR2	0.0101452	0.241805	-0.0180926	-0.0878781	-0.0508377	0.00713659	-0.0201598	-0.121987	-0.00592091	0.0126534	-0.0637826	0.276109	0.00396782	-0.0487309	-0.134427
P10809	-0.923878	-2.20303	1.37991	0.331645	-1.41054	0.269814	0.134642	0.134823	-0.164623	-0.376545	3.49543	0.232526	0.0719837	-0.853863	-0.1183
Q5T1M5	0.110435	0.010268	0.0059261	0.0668834	0.0862573	-0.00846042	-0.0999407	-0.0513441	-0.0591913	-0.0473677	0.00478666	-0.114941	-0.022342	0.0258258	0.093205
P49321	-0.0336844	0.27596	0.00719954	-0.49747	0.00136172	0.145778	0.095642	0.0550949	0.183229	0.203003	-0.254432	-0.304083	-0.187393	0.277163	0.0326308
P49247	-0.086182	0.0766801	0.0638135	-0.0243858	-0.0132956	-0.00814518	0.0202976	-0.0185038	-0.0174497	-0.000672485	-0.0354693	-0.0266055	0.0642442	-0.0165943	0.0222683
Q99460	0.370181	0.243033	0.167605	-0.427344	0.0345179	-0.23081	-0.0183232	-0.128012	-0.0759149	0.141312	0.20563	0.0229591	0.0722889	-0.0167435	-0.360379
Q9P2M7	0.0382882	0.00273483	-0.158792	-0.0790912	0.0580395	-0.00109361	0.108377	0.0853308	-0.306639	-0.0433443	0.16573	0.183547	0.0187154	-0.136069	0.0642665
Q01844	0.0518387	0.0499101	0.0253071	-0.175474	-0.107637	-0.0726721	-0.0552299	0.00103484	-0.0444968	0.145592	0.331287	-0.107078	-0.084607	0.109331	-0.0671057
Q29RF7	0.16267	-0.0168194	-0.123682	0.0280883	-0.00749575	0.000575616	-0.0348689	-0.0261132	0.107005	0.053409	-0.0332214	0.0476702	-0.135578	0.0195172	-0.041157
Q8WUM4	-0.0994939	0.119039	0.192136	-0.210196	0.441163	-0.151644	-0.0432629	-0.105343	-0.0295221	-0.186925	-0.327298	-0.0417255	0.214198	0.11478	0.114094
Q9BTC0	0.258451	-0.0633641	-0.0365532	-0.0810703	0.0727263	-0.147726	0.0222985	-0.0720278	-0.0523624	-0.0260634	-0.121302	0.220716	-0.0866045	0.160622	-0.0477409
Q86V81	-0.080442	-0.356189	0.0775324	0.0955055	-0.144632	-0.117931	-0.0684695	-0.100878	-0.0386666	0.212657	0.583374	-0.0554943	0.0561607	-0.199577	0.13705
Q9NR30	-0.174559	-0.661112	0.469535	-0.131532	-0.450915	-0.0356993	0.0199724	-0.0381506	-0.0609961	0.0843984	0.876213	0.535549	0.293661	-0.756988	0.0306246
P40926	-0.288174	-0.728426	-0.349543	1.06563	-0.797462	0.152207	-0.0179359	-0.0507734	-0.0367299	0.113932	0.197482	0.810854	0.689919	-0.604765	-0.15621
Q6P9B9	0.0226293	0.00417718	0.0351383	-0.0130083	-0.0124099	-0.00542753	-0.00756787	-0.0580221	-0.018139	-0.0387921	0.0150409	0.0487325	0.0283992	0.0443226	-0.0450733
Q9UKM9	-0.0453593	-0.361427	0.0296697	0.524319	-0.477235	-0.270215	0.306732	0.33987	-0.16377	0.184611	0.137894	-0.504906	0.145227	-0.0250522	0.179641
Q13435	-0.0577897	-0.515943	0.230227	0.235936	-0.215337	-0.0308995	0.0815394	-0.0600534	0.0633699	-0.126625	0.444759	-0.15936	-0.0755163	0.117222	0.0684702
Q8TDD1	0.0119574	-0.0808937	-0.0950928	-0.159566	-0.00578207	0.0255652	-0.148665	0.0875731	-0.179241	0.111691	0.321163	0.00553287	0.308934	-0.374307	0.171132
Q9BZE4	-0.202739	-0.322469	0.16072	-0.0251882	-0.0966024	-0.0593444	0.126014	0.133313	-0.0874662	-0.0512741	0.500958	0.113573	0.0463778	-0.180901	-0.0549714
Q6P2Q9	0.0139965	-0.643331	0.174716	0.11144	-0.0796896	-0.0877178	-0.209516	-0.0820306	-0.140996	-0.245935	0.319971	0.520513	0.668048	-0.463346	0.143876
Q8N8S7	0.0171102	0.124622	-0.00828221	0.335402	0.0447819	0.0338563	-0.0809293	-0.0276671	-0.258182	-0.0357309	-0.135918	-0.0482072	-0.00249014	-0.165647	0.207282
Q7L8L6	-0.0368459	-0.128211	-0.0689049	0.0830132	0.00184734	0.0575185	0.112162	-0.0249548	0.0499579	0.038944	-0.0422019	0.0520824	0.00881253	-0.115871	0.0126522
P06733	0.0751915	1.20965	0.288905	-1.21375	0.756187	0.0883511	0.158477	0.0821618	-0.0253242	-0.214863	-0.312821	-0.377301	-0.34387	0.0403883	-0.211375
P00558	0.133111	0.723421	-0.0739422	-0.794683	0.915265	0.16919	0.11556	0.113685	-0.171197	-0.0320645	-0.628579	-0.526886	-0.286588	0.270442	0.0732663
Q9UMY1	0.0896412	-0.128841	-0.152805	-0.111499	0.160069	0.0829276	-0.0676165	-0.100266	-0.0602318	-0.0704209	0.0470363	0.0869562	-0.0279289	0.0699739	0.183005
P22033	0.150642	-0.237248	-0.0360515	0.0462299	-0.148856	0.0290996	0.0186884	-0.131954	0.0634372	-0.066518	0.0025655	0.285471	0.213847	0.0723565	-0.26171
Q7Z3T8	0.071868	-0.0188119	-0.00582704	-0.0307922	-0.0123734	-0.0148866	0.0148765	0.00441493	-0.000378403	0.0146769	-0.0401022	-0.0157742	0.00644592	0.0334798	-0.00681599
Q9NP81	-0.135778	-0.29586	-0.21556	0.237105	0.00759359	0.0249243	0.0948457	0.127349	0.0479785	0.0373815	-0.190454	0.221653	0.175126	-0.0820986	-0.054207
P00390	0.0467733	0.016007	-0.0134209	-0.0887457	-0.0861828	0.042126	0.0606091	0.0811152	0.00214659	0.0925574	-0.00554497	0.0569103	-0.172275	0.0617167	-0.093792
Q8NFQ8	-0.00285299	-0.0418565	0.0159063	0.163676	-0.0232498	0.00137483	0.0397123	-0.0140955	-0.10454	-0.0033561	-0.0751977	-0.0216883	0.0402028	-0.0515041	0.0774687
Q15125	-0.0798343	-0.0268919	-0.186747	0.321851	-0.197061	-0.0585562	-0.0376824	-0.00755128	-0.0661556	-0.0651926	-0.0124559	0.283936	0.229793	-0.0479473	-0.0495046
P35611	0.0638675	0.0488787	-0.115087	0.0138409	-0.17766	-0.0359534	0.0508346	0.0521759	-0.0160206	-0.0382347	-0.109056	0.0262661	0.1923	0.0512736	-0.00742627
O43895	-0.038876	-0.038542	0.104847	-0.0304591	0.0157595	-0.0148952	0.00115112	0.000553751	-0.0174016	-0.000720416	-0.00586168	-0.00800864	0.0481371	-0.0341168	0.0184328
P01024	-0.0677121	-0.147324	0.0814218	-0.0579299	0.533697	-0.0967884	-0.154651	-0.0660971	-0.170571	-0.0329948	-0.0868769	0.146825	0.237318	-0.160823	0.0425064
P02751	-0.426517	-0.887762	-0.19844	-0.634876	0.476607	0.0334726	0.0884659	0.170118	0.147137	0.1531	1.42858	-0.462337	-0.233297	-0.245883	0.591629
P24752	-0.424334	-0.356713	0.148549	0.141873	-0.29061	-0.0626533	0.0341746	-0.0837191	0.118411	0.0946037	0.516952	0.206761	0.217677	-0.206905	-0.0540667
P51659	0.0417204	-0.353482	-0.457048	0.775875	-0.233268	-0.0760757	-0.101923	-0.158096	-0.0100152	-0.0487747	-0.0434697	0.447015	0.291656	0.024563	-0.0986772
P11310	-0.0521457	-0.215003	-0.0902294	0.0729069	-0.116387	0.0818859	0.0657391	0.0197952	0.0751186	0.0894301	-0.12185	0.176058	0.130829	-0.112493	-0.00365376
P69905	-0.533623	-0.126867	-0.580543	0.214209	0.531388	-0.120322	-0.0780747	-0.0861339	-0.159095	-0.108743	-0.294258	0.621406	0.834406	-0.115394	0.00164303
O75955	0.178913	-0.161238	-0.169974	0.188171	-0.104119	0.0255208	0.082178	0.0200142	0.0462276	0.0917294	-0.18399	0.126194	0.112184	-0.245882	-0.00592906
O15498	0.0941696	0.402551	0.00930833	0.00168198	-0.183889	0.0795448	0.0541616	0.105271	0.0941647	0.104942	-0.499754	0.155486	0.12349	-0.240373	-0.300755
P02545	-0.330495	-1.18907	-0.873308	1.93034	-0.819388	0.803865	0.729237	0.15212	0.821663	0.628904	-0.841774	-0.425797	-0.383604	-0.251182	0.0484807
P51649	0.0639585	0.0192247	-0.153572	0.0311756	-0.0542753	-0.0810798	0.0198875	0.00401761	-0.175594	-0.0277171	0.0332023	0.15857	-0.00270823	0.0929547	0.0719561
O60437	0.412912	-0.0600856	-0.110936	0.331023	0.127106	-0.118344	-0.0738759	-0.166003	-0.00894681	-0.149551	-0.42358	0.041441	-0.0251431	0.158144	0.0658388
P05141	0.192234	-0.188004	-0.0894717	0.441738	-0.560866	-0.136225	-0.153912	-0.115525	-0.241486	0.00923233	0.303381	0.6925	0.579627	-0.386761	-0.346461
O00186	-0.0540679	-0.113892	-0.0917651	0.173839	-0.086433	0.0504848	-0.0340487	-0.0253669	-0.038693	0.0608785	0.201025	0.143956	-0.0243379	-0.0791074	-0.0824708
P49821	-0.11258	-0.262681	-0.0246519	0.313689	-0.164186	-0.0915767	0.0644405	0.00345517	-0.221726	-0.0316039	0.26804	0.232918	0.270712	-0.0537803	-0.190469
Q12873	0.0252803	0.0341553	-0.035081	-0.00569776	0.0163147	-0.0711363	-0.0137153	0.0153887	0.00535221	0.00400394	0.127663	0.0379604	-0.0125533	-0.0622047	-0.0657306
Q14839	-0.0850317	-0.354073	0.0551475	0.326891	-0.258306	0.0158391	0.0243242	-0.0207285	-0.0825651	-0.151237	0.129678	0.257597	0.124739	-0.072057	0.089784
P04083	-0.0404991	0.377442	-0.237387	-0.909445	-0.0684595	0.452887	0.404398	0.459689	0.360061	0.507303	-0.424923	-0.273793	-0.211861	-0.217576	-0.177837
P08237	-0.252563	0.21912	-0.16934	-0.24998	0.205283	-0.0419016	5.35438e-05	0.0398966	0.0650618	0.0188841	-0.00582028	-0.0684237	0.0983221	0.183432	-0.0420241
Q14019	-0.160205	0.373055	0.155779	-0.595822	0.274979	0.177207	0.0373403	0.145332	0.175862	-0.00679943	-0.350381	-0.225976	-0.0962728	0.165459	-0.0695562
P22695	-0.13214	-0.336644	-0.0369802	0.42177	-0.20489	0.0869338	0.0580673	-0.123974	-0.0231538	0.0474854	0.0766058	0.148111	0.460806	-0.371536	-0.0704599
P54136	0.334372	0.524399	-0.185549	-0.364822	0.219852	0.0165312	0.00198192	0.16772	-0.108186	-0.284031	-0.185546	-0.21907	-0.121457	0.212894	-0.00909019
P30419	0.0350782	0.222419	-0.0130245	0.168737	0.0623044	-0.0807198	-0.0824909	-0.0609172	-0.0771531	-0.078384	-0.0521403	-0.132171	-0.0368453	0.114092	0.0112144
Q8NBJ5	0.0611992	-0.17222	-0.0534329	0.00706017	-0.512034	0.107092	0.179663	0.0921557	-0.371961	0.09672	0.214176	0.307481	0.366626	-0.463691	0.141166
Q9Y6Y8	0.000275313	0.0698329	0.0275077	-0.0488793	-0.0304579	0.0159036	0.0238195	-0.0257934	0.0551059	0.0154371	-0.099805	-0.0139644	-0.0826807	0.0737024	0.0199963
P51610	0.109518	0.157488	-0.317189	-0.15403	0.0631516	0.00246589	0.168305	0.126975	-0.104886	-0.24657	-0.318591	0.255059	0.0225586	0.0358756	0.19987
P62873	0.0145412	-0.221553	0.0542338	0.375158	0.0792069	-0.0881961	0.0387108	-0.0821538	0.0717161	-0.0681421	0.166849	-0.140041	-0.0099923	-0.0812938	-0.109045
Q96QK1	0.205173	0.22759	0.130081	-0.317602	-0.0420738	-0.00657866	-0.00668362	-0.224977	-0.130216	-0.00938841	0.0557083	-0.134992	-0.0476206	0.324952	-0.0233728
Q99683	-0.340793	-0.17522	0.0527797	-0.123938	-0.472554	0.168661	0.230674	0.181513	0.117473	0.0039009	0.20142	-0.220769	0.171061	0.0566475	0.149144
O00469	-0.0166873	-0.175101	-0.153345	0.429478	-0.109935	-0.0746626	-0.0465365	-0.0396774	-0.111618	0.042908	-0.199493	0.114282	0.178038	0.113084	0.0492663
Q9UJV9	-0.099654	-0.0906889	-0.072657	0.0598707	-0.055262	-0.0090194	-0.154028	-0.0859052	0.0337619	0.112574	0.110326	0.0537844	0.118897	0.00619572	0.071805
P48449	0.146902	-0.161602	0.0485443	0.0141911	-0.137646	-0.0698891	0.00172298	-0.00117002	0.13208	-0.155864	0.00130286	0.131447	0.150193	0.0466611	-0.146873
P05156	-0.164648	-0.0786681	-0.0644339	0.309724	-0.109682	0.110504	0.104946	0.134895	0.0792161	0.00754024	-0.195	-0.0589444	0.0134063	-0.0615133	-0.0273415
A0FGR8	-0.17865	-0.22493	-0.234539	0.299122	0.000883296	0.0772212	-0.086503	-0.049352	-0.00730817	0.021426	-0.0463968	0.193049	0.181296	0.0302195	0.0244612
Q14573	-0.0553379	-0.198794	-0.0651931	0.0874229	-0.254864	0.197683	0.179975	0.144135	-0.0741136	0.148766	0.079169	0.116553	-0.00264347	-0.105702	-0.197054
P22415	-0.00860814	-0.00764707	-0.0101746	0.0979842	0.0182212	0.00168356	-0.0122097	-0.0134254	0.00984367	-0.00848036	-0.0499342	-0.0103275	-0.0214868	0.0224663	-0.00790507
P36915	0.0883241	0.198639	-0.0878823	-0.187849	0.159517	0.0194298	0.0714173	0.0353615	-0.0019909	0.0247361	-0.120364	-0.0852351	-0.0233469	0.00888693	-0.0996444
Q92878	-0.0460624	-0.0690803	0.0273398	0.0212863	-0.198243	-0.122016	-0.153502	0.0761769	-0.0266216	-0.0290019	0.111789	0.293047	0.086972	0.146013	-0.118098
Q8IYI6	0.082547	-0.105897	-0.0727908	0.00554864	0.0566328	-0.0185992	0.02121	0.0133173	-0.0291414	0.0264165	0.0146041	-0.0365373	-0.0492908	0.149738	-0.0577581
Q92896	-0.026689	-0.408731	-0.0722681	0.331748	-0.0084823	-0.230511	0.0126116	-0.00260727	-0.0383016	-0.0348646	-0.0939493	0.296409	0.146397	-0.100198	0.229437
Q9BTC8	0.114508	-0.0197074	-0.119209	-0.0184618	0.0183095	-0.0483457	-0.0562363	0.0611974	-0.0515182	0.0100446	-0.0232067	0.133385	0.0669267	-0.0203515	-0.0473345
Q6PD62	-0.0494336	-0.114385	0.110644	-0.0818442	0.0118403	0.0188308	-0.102149	0.127122	-0.0906196	0.087435	-0.0104364	0.0691063	0.10276	-0.0587	-0.0201701
Q14847	-0.0385551	0.24108	0.0012877	-0.300012	0.38032	0.00254274	0.0194981	0.0461844	0.0378028	0.0507821	-0.240577	-0.265764	-0.117282	0.150652	0.0320407
Q9H9P8	0.0542817	-0.0111915	0.047814	0.0747029	-0.0342478	-0.0342461	-0.224742	-0.0187147	-0.0126602	-0.0799863	0.14518	0.176544	0.0542155	-0.13912	0.00217118
Q9Y5J1	-0.033118	-0.200856	0.0251203	0.012852	-0.0666023	-0.00380853	0.0164359	0.0889488	-0.0460851	-0.000622213	0.197371	0.0436294	0.00380293	-0.0853196	0.0482517
P55789	0.00587928	-0.143452	-0.0205713	0.0313221	-0.0200956	0.0199539	0.0365561	-0.0156679	-0.0407299	0.00655028	0.0830679	0.00270774	0.0761664	-0.0481656	0.0264784
P00533	-0.144577	-0.269175	0.205075	-0.109437	-0.148969	0.0160374	0.0773361	0.0884129	0.11007	0.161119	0.531858	-0.186247	-0.0466226	-0.231279	-0.0536034
P62879	-0.207747	-0.320041	-0.161548	0.141705	-0.143337	0.000538112	0.0485142	-0.0458378	0.0933698	0.0300079	0.119223	0.247192	0.108712	0.0255075	0.0637418
Q99536	0.0567372	0.325454	-0.389693	-0.190545	0.28449	-0.0150207	-0.00148566	0.0125377	-0.0510429	-0.105401	-0.334652	-0.0407217	0.118556	0.155444	0.175343
P09382	-0.269999	-0.54161	-0.406159	0.829469	-0.193426	0.1931	0.122447	0.272758	0.245346	0.050586	0.124592	-0.135625	-0.0745616	-0.220954	0.00403738
P49903	0.158712	0.166189	-0.0559157	-0.110971	0.0308807	-0.0450253	-0.00452712	-0.0256057	0.0163364	-0.0112999	0.0183299	-0.0780537	-0.0463078	0.12379	-0.136532
O14964	-0.044335	0.0561467	-0.00959623	-0.109351	-0.0446142	-0.0675151	-0.0104124	0.0237493	0.0551264	0.106233	-0.105111	-0.0627443	0.0231187	0.107819	0.0814861
P15924	0.11105	-0.258443	0.349954	-0.397198	0.747471	-0.210348	-0.363713	-0.266394	-0.0269661	0.130877	0.0975019	-0.671631	-0.309141	0.0788381	0.988142
P55769	-0.184106	-0.364061	-0.210712	0.330088	-0.353671	0.0908352	0.117081	0.0999795	0.0764164	0.175767	0.308305	0.236186	0.0396957	-0.305084	-0.0567194
O43156	-0.00450207	0.0299002	-0.0244872	-0.061237	-0.0311879	-0.0462742	0.0221557	0.071206	-0.0191169	0.000557209	-0.0177667	-0.0133907	0.0550714	0.0385914	0.0004808
P29144	0.107215	0.0727537	6.47258e-06	-0.0240367	-0.0737082	-0.231721	0.0493628	0.129687	-0.0928416	0.0738379	-0.00330511	0.0930882	0.07619	-0.0930574	-0.083471
A0AVT1	-0.196732	-0.00299111	0.129322	-0.125434	0.22402	0.0661029	0.0659461	-0.0423214	-0.16056	0.0217865	-0.0690756	0.073189	0.0356444	0.168499	-0.187396
Q14690	-0.136444	-0.297789	0.085363	-0.108353	-0.2593	0.0988205	0.100133	0.128412	-0.109977	0.349858	0.278286	-0.0381858	-0.214468	-0.0988166	0.222461
Q6YN16	0.00150576	-0.286017	-0.10821	0.218927	-0.194883	0.0348678	0.0530823	-0.198719	-0.110022	-0.168431	0.00661381	0.329767	0.305017	0.0516379	0.0648633
Q9H0B6	-0.0100822	-0.0149119	0.0108014	0.00114524	-0.0386557	-0.0137549	0.0138917	-0.0289021	0.0206861	0.00884062	0.0575338	0.0671678	-0.0497143	-0.0204938	-0.00355175
Q86VI3	-0.0100135	-0.0286052	0.0168028	-0.0451193	0.073054	-0.0466132	-0.0159055	-0.0113208	-0.017619	-0.016601	0.0625587	0.0966413	0.016089	0.0471332	-0.120482
P53801	-0.00922984	0.000124411	-0.211244	0.165884	-0.0326522	-0.0568211	0.0285085	0.0930885	0.0222952	-0.0314394	-0.186182	0.141537	0.199899	-0.121301	-0.00246652
P36952	-0.069122	0.225537	-0.176848	-0.243218	0.179707	0.0449201	0.061819	0.0408653	0.0585541	0.068037	-0.144614	-0.0585292	-0.076684	0.0811701	0.00840635
P35998	0.0143753	0.229982	0.383266	-0.455193	-0.180697	0.0693696	-0.143242	-0.241626	0.0733706	0.0450316	0.303974	-0.00335239	-0.164281	0.136092	-0.0670712
P12814	0.274173	-0.331038	0.603519	0.0838151	0.273726	-0.252701	-0.261902	-0.320247	-0.170921	-0.259874	0.99388	-0.761366	0.117317	-0.183561	0.195181
O43707	0.274086	-0.573869	-0.248396	1.2816	0.208831	-0.190103	-0.200418	-0.153264	-0.122071	0.0782056	-0.260541	-0.721679	0.708219	-0.439198	0.358593
P63272	-0.183514	-0.170594	0.030373	0.0120797	0.0229309	0.0414159	0.0770868	0.0904219	0.0607603	0.0508519	0.0298105	0.035241	0.0376424	0.0333452	-0.167851
Q8WUA2	0.0714962	-0.120681	0.0638733	0.0356587	-0.0471209	-0.0054384	0.00655035	0.010395	-0.0245656	0.0424494	0.00207736	-0.11053	0.0378334	0.0376747	0.000327995
Q9BZH6	-0.0671749	0.0320604	-0.137762	-0.0412197	0.127854	0.0355484	0.0599601	-0.0365452	-0.0665578	-0.0304869	0.00962524	-0.132911	0.157868	0.0156403	0.0741014
Q9BW27	0.0720153	-0.230948	-0.00650088	0.1312	0.098951	-0.26191	0.132384	0.0916317	0.12328	0.104371	-0.061146	0.191929	-0.106773	-0.0876778	-0.190807
Q9Y4D8	0.0573841	0.0487622	-0.231665	0.155334	0.0942869	-0.0256611	0.0452616	0.116057	-0.0655138	0.081038	-0.307956	-0.0310521	0.0309362	-0.0163075	0.0490954
Q9BQ67	-0.0610521	0.209867	0.228468	-0.351002	-0.0333009	0.0448437	-0.0351755	-0.156998	0.0492155	0.0853981	0.11374	-0.0942108	-0.0169923	0.10177	-0.0845713
Q8IZL8	0.057536	-0.227088	0.111288	0.356211	-0.0271641	-0.100026	-0.203304	0.0602187	-0.0318872	-0.128616	0.0167507	0.161327	0.0465664	-0.155264	0.0634525
P11047	-0.181437	-0.181983	-0.0124325	0.0578072	-0.138501	0.0617905	0.086201	-0.21919	0.145521	0.182085	0.019149	0.0375995	0.0880305	-0.0165526	0.0719118
Q8NHP8	-0.13089	0.0424743	-0.184607	-0.0261718	0.00626752	0.00603118	0.0652734	0.029523	-0.0109914	0.0655822	0.130131	0.157154	0.117215	-0.266153	-0.000838102
P11717	-0.0253026	0.0486682	0.0296698	0.208691	-0.0689868	-0.0643119	-0.0613207	-0.19853	-0.0667232	-0.0435215	0.037888	0.0963683	0.198571	-0.0120668	-0.0790925
Q14146	0.0546014	-0.0418959	-0.0752119	-0.0371488	-0.0898351	-0.0628651	-0.0165604	0.0162328	0.0107355	-0.00442992	0.20371	0.0848429	-0.00684781	0.00118924	-0.0365171
P15927	0.0704045	0.0646485	-0.0866904	-0.188294	-0.0859131	-0.0635593	-0.0203386	0.0929117	0.113488	0.168569	0.167018	-0.146107	-0.139062	0.145055	-0.0921312
Q68E01	0.0936602	-0.0675457	0.102042	0.0599303	-0.0429828	-0.0369469	-0.0262849	0.0191439	-0.09551	-0.0766572	0.0494923	0.00954395	0.0931039	-0.0201212	-0.0608684
Q9Y4A5	0.0559235	-0.0436784	0.0824151	0.19764	-0.00621956	-0.172426	-0.0550531	-0.103915	0.0142737	-0.189134	0.0107313	0.178204	-0.0753688	-0.00581001	0.112418
P26358	0.000195297	0.0574414	0.278743	-0.354745	-0.0599624	-0.0388398	-0.00291013	0.020083	0.103456	0.0732298	0.278188	-0.145244	-0.224604	0.163707	-0.148737
P61247	-0.115589	0.632119	0.338797	-0.98731	0.21649	0.138584	0.0657896	0.113235	0.062723	0.00753055	0.200785	-1.01954	-0.292728	0.368721	0.270393
Q14919	0.0828921	0.0861646	0.0559199	-0.243352	-0.0434742	0.0323138	0.0448276	0.00251278	-0.034402	-0.0482619	-0.0698706	0.0496617	0.0272418	0.0863398	-0.0285132
Q96I99	0.0484249	-0.17714	-0.129889	0.440772	-0.133309	-0.0106681	0.00126659	-0.018851	-0.0706112	-0.195795	0.106354	0.213617	0.10937	-0.122837	-0.0607065
Q9NQR4	0.0986899	0.038782	-0.0430991	-0.251961	0.12666	-0.0223978	0.00349446	0.00468359	-0.139818	0.0231422	-0.0169379	0.0543906	0.0974914	-0.0316611	0.0585408
Q99797	-0.177543	-0.0981936	-0.0637785	0.00392569	0.0269232	0.0444945	0.0335493	-0.096242	0.00227238	-0.0565385	0.243723	0.189816	0.0423024	-0.114492	0.0197805
Q2M1P5	0.0228019	-0.0385049	0.0475445	-0.121272	-0.0818535	0.0486929	0.0153377	0.00204095	0.0293341	0.066407	0.104881	-0.0105689	-0.00515944	0.0314469	-0.111128
P11498	0.100044	-0.135763	-0.273608	0.269322	0.019286	-0.0323671	-0.0498624	0.059341	-0.155829	-0.0714003	-0.0275245	0.171644	0.118978	0.0221631	-0.0144233
Q15067	0.18575	-0.16912	-0.0392911	-0.206922	-0.154472	-0.0373999	-0.0238902	0.0596811	-0.0292345	0.00733802	0.168377	0.0594763	0.290562	-0.163093	0.0522393
P49368	0.147956	0.116662	0.367935	-0.554139	-0.0187744	-0.143831	0.0203856	0.0365296	0.167541	0.194753	0.348151	-0.205429	0.1127	0.0545843	-0.645025
Q14669	-0.0328088	0.0158303	0.189175	-0.0062374	-0.0654143	-0.139774	-0.119682	-0.0520489	-0.147945	-0.125537	0.296673	0.201332	0.0624851	-0.0923867	0.0163381
Q6KC79	0.0452531	0.0959492	-0.0153131	0.0432427	-0.0277336	-0.135168	-0.0172149	0.0301632	-0.0663353	-0.0535748	-0.00310204	-0.156517	0.0961023	0.0696854	0.0945623
P49915	0.283277	0.61241	-0.039841	-0.482023	0.125831	-0.0212751	-0.0331381	0.00106136	-0.0573938	0.042184	-0.113954	-0.233947	-0.177444	0.280456	-0.186204
A6NHR9	0.212002	-0.206615	0.198272	-0.32233	0.0325284	0.146541	-0.0493915	-0.0280622	-0.102012	-0.164583	-0.2228	0.166918	0.08181	0.229074	0.0286475
O15067	-0.176549	-0.0578268	-0.0496071	0.192488	0.252038	0.108932	0.0962019	0.029835	0.0421438	0.0829383	-0.206314	-0.179006	-0.106773	0.0319159	-0.0604164
P00491	0.179884	0.333731	-0.0380798	-0.409329	0.178352	-0.0873398	0.0645777	-0.0099881	-0.187296	-0.00122775	0.0902247	0.0909687	-0.00384692	0.0395987	-0.240229
P61962	-0.00307723	0.380301	-0.0372788	-0.0882243	-0.106746	-0.0273571	0.0210569	-0.0574063	-0.0558751	-0.022839	0.0813719	0.103593	-0.0833946	-0.0676061	-0.0365183
Q9Y2K7	0.0598329	-0.128404	-0.0870833	-0.0255796	0.0189197	-0.0195455	0.0274439	0.131691	-0.0117581	-0.0462138	0.0625698	0.0747103	-0.0507444	-0.0318547	0.0260163
Q9BWS9	-0.138181	-0.0361255	-0.0355085	0.0622102	-0.0613985	0.0872921	0.151395	-0.132307	-0.0132509	0.035569	-0.138643	0.137746	-0.0418323	-0.0512735	0.174308
P05023	-0.170036	-0.507847	-0.264672	0.299578	-0.130782	-0.0343372	0.00295485	-0.115395	-0.0166602	-0.0479188	0.330383	0.438357	0.122067	-0.217088	0.311397
O95373	0.155908	0.230191	0.243612	-0.411603	0.25956	-0.077197	-0.0440991	-0.0547077	-0.0512997	-0.016329	0.0920911	-0.103753	-0.279927	0.170579	-0.113026
Q9Y618	-0.00600149	0.0682459	-0.112574	-0.0423505	-0.135414	-0.00597198	0.0675743	0.0263757	0.0206265	0.0271649	0.0363669	-0.0954354	0.067975	0.0736964	0.00972244
P23396	0.290497	0.994096	0.751628	-1.06831	-0.359327	-0.496095	0.187456	0.530583	0.0391091	0.111902	-0.418237	-1.04408	-0.806472	0.649306	0.637946
P61163	0.0450684	0.180258	0.0351837	-0.182076	0.0375344	-0.0701061	0.00362406	-0.0604346	-0.0754053	-0.00180426	1.40132e-05	-0.00128956	-0.0318637	0.154619	-0.0333225
Q9H8Y8	-0.187596	-0.0164063	0.107409	0.0976537	-0.00212393	0.000258479	-0.173781	0.00803455	-0.0232718	0.0583665	0.0457499	0.0397861	0.0633676	-0.0725883	0.0551415
O94905	-0.021121	-0.0488099	-0.175393	0.384431	-0.0943105	0.0654363	0.00923322	-0.0799804	0.0185903	0.006435	0.134886	0.0604083	-0.0850746	-0.14257	-0.032161
Q13409	-0.271484	0.0850781	-0.0767721	0.023684	0.161743	0.147322	0.0738897	0.152828	0.120502	0.0241629	-0.250804	-0.162342	-0.155868	0.171904	-0.0438434
P08758	0.343968	0.608915	0.246262	-0.648633	-0.183579	-0.0853672	0.531635	0.00541047	0.571667	-0.0308551	-0.569351	-0.338799	-0.424705	-0.183237	0.156669
O75477	0.107246	-0.131184	0.0211386	0.0576426	-0.0561484	0.00591707	-0.119038	-0.133025	-0.108371	0.0338422	0.101701	0.117422	0.122458	-0.034936	0.0153356
O14936	-0.0813088	0.0274849	0.0101544	0.0479856	0.0127247	-0.0463556	0.00810065	0.0122319	-0.0167285	0.0308024	0.0183563	0.0036475	0.0249028	-0.0186744	-0.0333237
Q9Y657	-0.0129438	0.015076	-0.0765222	0.0944171	-0.0547221	0.0082592	-0.0282968	0.0599148	-0.0445496	0.0542205	0.00387444	0.00245256	0.015541	-0.0430323	0.00631113
Q567U6	-0.0496297	-0.0137167	-0.0520799	-0.00896154	0.009458	-0.0129589	0.0128461	-0.00198295	-0.00994732	-0.00855596	0.27549	-0.0516897	-0.0446477	0.000758636	-0.0443819
Q8WYJ6	0.0534035	0.181695	-0.0176561	-0.0906055	0.0490653	0.0259372	0.0401322	0.0277427	0.00150317	-0.00885428	-0.435699	0.00867981	0.0484312	0.135244	-0.0190192
Q6NYC1	0.0243867	0.0538494	0.0318869	-0.0191848	0.0121977	-0.0175281	-0.00714382	-0.0540292	-0.0176385	-0.00545163	0.117963	-0.0699159	0.00212477	-0.0450463	-0.00647047
Q9BQ52	-0.113365	-0.112743	0.266069	-0.25058	-0.0781582	0.244088	-0.00101769	-0.0991834	-0.00538564	0.0357929	0.111302	-0.000814183	-0.0505269	0.0524394	0.00208287
Q96HS1	-0.301126	-0.31522	0.00386485	0.100772	-0.13345	0.0726464	0.0357724	0.108246	0.0568136	0.0718021	0.256248	0.0954202	0.121926	-0.131273	-0.0424429
O95433	-0.0379594	0.31573	0.0194675	-0.0867477	0.00804987	-0.0116338	0.054313	-0.0798128	0.0764422	0.0319843	0.106007	-0.18872	0.0921988	-0.234487	-0.0648317
P49411	-0.582819	-1.10686	0.211245	0.399839	-0.47067	0.0899969	-0.0477444	0.129028	0.0720346	-0.116175	1.27779	0.278517	0.120819	-0.4196	0.164594
P42704	-0.393954	-0.720775	0.327936	0.116701	-0.488374	-0.0552561	-0.144238	0.127764	-0.109208	-0.256074	1.39664	0.559827	0.0838599	-0.537085	0.0922356
Q8WXH0	0.165924	0.0570009	-0.100822	0.140393	-0.00242583	-0.0661971	-0.103896	-0.174299	-0.036338	-0.1049	-0.176604	0.0879867	0.138297	0.189808	-0.0139263
O75843	-0.0690605	-0.0785525	-0.0311163	0.0360924	-0.0100064	-0.00835504	0.00268099	0.0373751	-0.0313372	0.0364512	-0.00289722	0.186165	0.0569523	-0.106526	-0.0178656
Q8IY37	0.0195791	-0.0569641	0.0289445	-0.0229929	-0.00231396	-0.0204883	0.0683921	-0.0871114	0.0668318	-0.0189931	-0.0312896	0.0628109	0.0903369	-0.0395778	-0.0571642
Q15262	0.0927964	0.0480355	-0.0892898	0.0171672	0.0578347	-0.00295686	0.000690069	0.0605807	-0.0192641	-0.0877464	0.0273245	-0.0393952	-0.0129357	-0.138612	0.085771
P22307	-0.0778126	-0.274353	-0.122746	0.521354	-0.220065	0.108169	0.120889	0.132903	0.017077	0.0121955	-0.276741	0.0980285	0.130556	-0.149526	-0.0199271
Q9H6R4	-0.054802	-0.231565	0.056459	0.0358678	-0.0295319	0.00656687	0.000868699	-0.0128411	0.0493978	-0.0470179	0.174731	0.14405	0.092287	-0.202629	0.0181591
O95202	0.0607848	-0.459386	0.253571	0.197338	-0.156637	-0.0217418	0.000285134	0.0198137	0.0141211	-0.0982337	0.275668	0.256303	-0.025571	-0.231952	-0.0843627
P00441	-0.0167973	0.0874361	0.0293099	-0.0511081	0.294322	-0.129044	0.0740831	0.117606	0.0280055	-0.00632817	-0.228165	-0.107938	-0.172109	0.18094	-0.100213
O43290	0.105661	-0.0798478	-0.240372	-0.149446	0.00558933	-0.0494259	-0.148578	-0.0204493	0.12985	0.142431	0.113807	0.156262	-0.109838	0.0167409	0.127616
O75821	-0.114907	0.154017	0.18041	-0.112081	0.038304	0.0526838	0.0468309	0.259943	0.0649846	-0.0171042	-0.072333	-0.226251	-0.276551	0.0416284	-0.0195745
Q96C86	0.13913	0.208427	-0.0677868	-0.131791	0.107942	-0.0803198	0.0264476	0.0580601	0.0451653	-0.0342352	-0.156	-0.0118717	-0.107017	0.0624153	-0.0585655
Q15370	-0.140557	0.28248	0.187096	-0.25332	-0.126982	0.193751	-0.145263	0.275184	0.277942	0.255949	-0.138244	-0.135129	-0.209635	-0.109101	-0.214172
Q9P2B2	-0.0189661	0.0275834	-0.0684081	0.0888752	0.0121413	-0.0856329	0.0191572	0.0320692	-0.0572379	-0.00828948	-0.128326	0.23742	0.00271419	-0.168137	0.115037
P61421	0.0383138	-0.150133	-0.00877495	0.09307	-0.0740716	-0.0617404	0.0571621	-0.0456785	-0.0559083	0.00132592	0.107345	0.254129	-0.0822013	-0.0157587	-0.0570788
Q9Y3Z3	0.229935	0.22419	-0.0597108	-0.349856	0.143131	0.022703	-0.0252445	0.0818302	0.00626177	0.101904	-0.235744	-0.189586	-0.196173	0.302686	-0.0563277
P48739	0.0161808	0.110462	-0.114859	-0.0923818	0.0304618	-0.0374095	-0.0249818	-0.0140105	-0.0737856	-0.0295759	0.0372642	0.126688	-0.0255727	0.157258	-0.0657383
Q06830	-0.00554248	0.574478	0.0524623	-0.750178	0.273635	0.116998	0.11503	0.140733	0.133211	0.0952432	-0.218923	-0.419703	-0.228269	0.189818	-0.0689915
Q13232	-0.0198868	-0.0955701	0.104438	0.0417027	0.0729217	0.032076	-0.191495	0.0426028	0.00376887	0.0436197	-0.00956305	-0.043995	-0.023142	0.00114524	0.0413767
Q6UX04	0.0449158	0.0412962	-0.0053271	-0.0010605	-0.0329005	-0.0101533	0.0232822	0.0472649	-0.0183388	-0.00161999	0.00889997	-0.0548893	0.00131532	0.0275465	-0.0702313
P46939	0.178528	-0.0197259	-0.0571906	-0.0054793	-0.120806	-0.0902218	-0.0948371	-0.0758616	-0.103783	-0.0205178	-0.00886975	0.191756	0.0205511	0.120577	0.0858817
P25786	0.105392	0.436223	0.102371	-0.483903	0.00652908	0.153352	0.0560102	0.15846	0.0810692	0.0444647	-0.0575075	-0.332344	-0.0553827	-0.00230306	-0.21243
O00499	0.026674	0.0780825	-0.0469637	-0.167611	0.116203	0.059642	0.038617	0.00393203	0.0703213	-0.168482	-0.00166345	0.00447758	-0.182513	0.140157	0.0291269
P53396	-0.0121236	0.599672	0.282609	-0.741147	0.239347	-0.124567	-0.0292728	0.0498521	-0.017936	0.0855725	-0.108415	-0.115254	-0.115945	0.29114	-0.283531
P14868	0.154572	0.385149	0.133473	-0.468267	0.200496	-0.036221	0.00646567	0.071375	0.0402641	0.0996359	-0.174306	-0.468556	0.0734555	0.079608	-0.0971443
O95573	0.196732	-0.403471	-0.274262	0.202637	-0.277064	-0.0173588	-0.0430988	-0.0573082	-0.0415089	-0.188994	0.0469653	0.587804	0.358806	-0.0662276	-0.0236511
P61803	-0.036127	-0.402144	0.267477	-0.18217	-0.00497009	0.172812	-5.47877e-05	0.0328017	0.228456	0.283235	0.0249682	-0.0877672	-0.226201	-0.248513	0.178197
Q9NX40	-0.114873	-0.0612781	-0.055339	0.14115	-0.0992389	0.0917545	-0.0913654	0.0302623	0.019392	-0.0326251	-0.106824	0.063538	0.113042	-0.00521675	0.107621
P35237	0.10381	0.0873016	-0.0975522	-0.124634	0.146791	-0.0853973	-0.0957173	0.0813062	0.0298177	0.0758185	-0.122945	-0.0098502	-0.0150244	-0.020051	0.0463263
Q9NQW6	0.112468	0.203396	0.00814239	-0.290403	-0.109174	0.0343923	-0.14738	0.054402	0.075092	-0.0669085	0.150612	-0.0694549	-0.0638344	0.118663	-0.0100127
Q14318	-0.0257378	-0.0438096	0.0289757	-0.141451	-0.0854454	-0.134795	-0.0304723	-0.00744179	-0.0762724	0.162823	0.142327	-0.0753508	-0.0390463	0.078358	0.247338
O94832	-0.0446828	0.00683931	0.00797461	-0.0568877	0.0120714	0.0656787	0.0595149	-0.0500108	0.0113608	0.0243486	-0.230437	0.0106197	0.187264	0.0445743	-0.0482278
P35579	-0.178707	1.15701	0.187334	-1.22107	0.680869	-0.415067	-0.394373	-0.0646735	-0.0605759	0.312843	0.165811	-0.548554	-0.234067	0.473965	0.139259
Q07157	-0.215694	-0.461178	0.23031	0.324549	0.0676816	-0.0729664	-0.0118128	-0.0633781	-0.0495261	-0.103613	0.291077	0.0534613	0.00794198	-0.139463	0.14261
P52788	0.120004	0.133207	-0.0228153	-0.186536	0.142743	-0.0905289	-0.127391	-0.0207235	-0.00566231	0.0464768	0.00271248	0.00894288	0.0220259	0.0100516	-0.0325074
Q8TD16	0.0367198	-0.0483314	-0.0590063	-0.26104	0.0214411	-0.00617941	-0.0126943	-0.0386784	0.0143605	-0.0375005	0.174677	0.0807623	0.0853208	-0.00898692	0.0591357
Q9NRF8	-0.0388768	-0.0490064	-0.0386033	-0.0603005	0.0817428	0.0281874	0.0102885	-0.10314	0.0396425	0.0511116	-0.111723	0.118437	0.053823	0.0621036	-0.0436868
Q96A35	-0.104836	-0.0538255	-0.0308212	0.272208	-0.114259	-0.1373	-0.0193944	-0.332762	-0.0324746	0.111403	0.27883	0.138834	0.163171	-0.146263	0.00748943
P63220	0.103044	-0.159744	0.197735	-0.309685	-0.189694	0.0864708	0.0705737	0.0441882	0.213675	0.0660756	0.151599	-0.691067	0.0845975	0.230263	0.101967
P25705	-0.00535539	-1.10352	0.159577	0.930665	-0.380931	-0.363319	-0.0327674	-0.410643	-0.690663	-0.350049	0.633403	1.10687	0.97896	-0.422984	-0.0492481
Q8N766	-0.0187938	-0.195002	-0.0422263	0.424921	-0.106606	0.00168979	-0.0533671	-0.0840171	-0.247189	-0.0863943	-0.00801997	0.271207	0.152477	0.033866	-0.0425449
Q6YHK3	0.203842	-0.128138	-0.403865	0.226873	-0.0387768	-0.0585419	0.111325	-0.0419251	-0.0400956	-0.152243	-0.140408	0.163738	0.212435	0.000422893	0.0853568
Q13308	0.140126	-0.0992222	-0.404866	0.272883	-0.0299235	0.0310428	-0.0552472	0.105213	-0.0866021	0.123224	-0.292213	-0.00655842	0.169954	-0.0891387	0.221328
Q13445	0.0144238	-0.140053	-0.0843869	0.204103	0.0325881	0.00386234	0.029241	0.102645	-0.000694865	-0.0309018	-0.172243	-0.00463814	0.0239977	-0.0324516	0.0545087
O14548	-0.0187244	-0.0570014	-0.0285166	0.0895638	-0.17391	-0.0458415	0.0351512	0.0333256	-0.00977136	0.0626971	-0.0483195	0.073146	0.170674	-0.0516745	-0.0307986
Q92692	-0.0618775	-0.104336	-0.0554854	0.180917	-0.0215406	-0.0226123	0.126029	-0.0563801	-0.0841315	-0.0876362	0.0160868	0.0909576	0.148781	-0.0993553	0.0305837
O94888	0.178935	0.20335	-0.0120135	-0.052453	0.0699527	-0.095782	0.0494222	-0.0433324	-0.126304	0.00794619	0.0133369	-0.0994007	-0.0371533	0.0856741	-0.142177
P62241	0.154448	0.602322	0.351371	-0.913992	0.333306	0.00448216	0.0612122	-0.0227733	0.0852634	-0.15829	0.142736	-0.554274	-0.339578	0.0988752	0.154891
P62333	0.25561	0.265669	0.259102	-0.367671	0.100342	-0.0802497	-0.0378563	0.0317861	0.157736	-0.0300619	-0.346697	-0.0433153	-0.0708103	0.112343	-0.205927
P08865	0.0594675	0.312559	0.362646	-0.584723	0.232126	-0.0157834	-0.0874893	0.0146517	-0.124782	-0.204077	0.917033	-0.798711	-0.209177	0.104584	0.021675
Q5VW32	-0.0584734	0.183738	-0.0286734	-0.145198	0.0392142	-0.0478395	0.00603675	0.0205803	0.00650887	0.0195059	0.0330303	-0.0173041	-0.00819556	-0.0340775	0.0311468
O14734	-0.00158953	-0.101397	-0.153885	-0.000329814	0.0610876	-0.116865	0.078564	0.048916	0.116719	0.13108	-0.0711042	0.0898545	0.0843753	-0.111983	-0.0534423
Q09666	0.236732	-0.719338	-0.916255	-0.211005	0.246679	-0.797354	0.153668	-0.130252	-0.597546	-0.591899	0.172914	1.1822	1.26336	-0.030067	0.738162
Q13439	0.106833	0.0564973	0.0636803	-0.211295	0.0673768	-0.0116144	0.00631493	0.0192999	0.075461	0.0310578	0.0230954	-0.242708	-0.00102727	0.119388	-0.102359
P05198	0.0338467	0.249397	0.360035	-0.520507	-0.0380264	0.205786	0.115387	-0.22674	0.112833	0.161211	0.0903235	-0.518815	-0.248746	0.237933	-0.0139185
P61221	0.114208	0.372896	0.134536	-0.446073	0.231574	-0.0836408	-0.0741086	0.0221621	-0.00111619	-0.00579547	-0.0409677	-0.1661	-0.0760808	0.207309	-0.188802
Q53H82	0.0741592	0.018583	0.047938	-0.0209229	-0.121479	0.00143618	-0.0343712	-0.0495996	-0.0662585	0.158724	-0.079114	-0.0768266	0.0430708	0.0536237	0.0510372
P36542	-0.183029	-0.275922	-0.0731839	0.594412	-0.0332885	0.110715	-0.335428	0.126639	0.0969239	-0.0220032	-0.233282	-0.209675	0.24849	0.0307904	0.157841
Q9H074	0.0693471	0.115159	0.0161925	-0.150324	0.0822987	0.0912046	-0.0617716	0.0708909	0.0354359	0.000285963	-0.260072	-0.0529747	-0.0324161	0.0654828	0.0112619
Q13418	0.0498152	0.118416	-0.0642672	-0.126983	-0.0290863	-0.0736993	-0.108541	0.0468849	0.0531837	-0.0533909	-0.0645393	-0.0121979	0.0180469	0.190328	0.0560295
P50914	0.078368	0.26375	0.259576	-0.527585	0.141606	0.00771004	0.0275415	-0.0161448	0.158686	-0.0135832	0.123871	-0.603435	-0.273585	0.26056	0.112664
Q9Y487	0.108609	-0.0659301	0.015955	0.00164945	0.0486473	0.0212805	-0.0292735	-0.00744419	-0.0118554	-0.00798865	-0.0743452	0.113762	0.0313159	-0.113215	-0.0311664
Q9NUJ1	0.112252	-0.230954	-0.0239594	0.164382	-0.143538	0.0550606	-0.00236361	-0.064081	0.0106348	0.0745124	0.0543976	0.199583	0.0949124	-0.186672	-0.114166
Q13740	-0.221297	-0.0777505	0.0144434	0.229233	-0.119794	0.0532119	-0.302402	0.011821	0.0832296	0.0418954	0.225721	0.106652	0.0552536	-0.213751	0.113534
P06748	-0.431731	-0.64162	1.15739	0.954662	-1.10117	-0.027712	-0.210143	-0.0237501	-0.0483986	-0.379881	1.37497	-0.0618664	0.781591	-0.980796	-0.361548
P06576	-0.166949	-0.943539	-0.213341	1.40051	-0.779341	-0.0181391	-0.150369	-0.119483	-0.0703082	-0.0840057	0.0674148	1.0129	0.8111	-0.812471	0.0660205
P13984	-0.0598683	0.0519736	0.0192678	0.0353931	-0.228406	-0.011014	0.0951185	-0.0208758	0.109308	0.13839	-0.105336	-0.033238	-0.0185269	0.127022	-0.0992072
P51688	0.0608659	-0.0435636	-0.0645454	0.0987345	-0.00243951	-0.0671736	-0.116277	-0.0133214	0.0221443	0.0287478	0.0226556	0.00736208	0.0958941	-0.04787	0.0187866
P68036	0.0892469	0.0641351	0.0765207	-0.163135	0.267516	-0.0218476	0.00924625	-0.0285533	-0.046228	-0.0335249	-0.0932352	-0.13082	-0.125583	0.122773	0.0134886
P61106	0.0341855	-0.163763	-0.0362159	0.469944	-0.163682	0.155014	0.0793601	0.213524	0.0229488	0.0829182	-0.586309	0.0331693	0.0302504	-0.104095	-0.0672502
Q15031	0.0830956	-0.014525	-0.0460071	0.0987864	-0.0960995	-0.0328122	0.036894	-0.112861	0.0333907	-0.0086366	0.0884141	0.00607539	0.0127789	-0.0245171	-0.0239765
Q04695	0.28334	1.01582	-0.464532	0.0862298	0.0971179	-0.114482	-0.113534	-0.0805941	-0.0300626	-0.0820972	-0.454494	-0.155802	-0.112712	-0.0692328	0.195034
P02533	-0.07527	1.63872	-0.0827613	-0.0576081	-0.11097	-0.0920651	-0.115442	-0.12683	-0.118977	-0.1284	-0.129855	-0.186946	-0.123124	-0.189442	-0.101025
P13645	0.662234	1.56596	-0.388541	-0.447966	0.485421	-0.262496	-0.235987	-0.253323	-0.21889	-0.275701	0.588317	-0.530444	-0.0187629	-0.851508	0.181681
O75691	-0.187867	-0.118686	0.099659	-0.0691261	0.000175551	0.0808171	0.0195324	-0.0221903	-0.112678	0.00826725	0.0767326	0.174728	0.0901029	-0.00703701	-0.0324301
Q99523	0.036367	-0.0466242	-0.0199939	0.0462129	0.060023	-0.00565211	0.0431103	-0.090582	-0.0421218	-0.100502	0.0386484	0.00482392	0.223722	-0.100483	-0.046949
Q9H2W6	-0.0157884	-0.0630598	-0.0319764	0.192611	-0.16075	0.136215	-0.116817	-0.0309696	-0.0790206	-0.00810707	0.0853706	0.085284	0.0817265	-0.0316341	-0.043084
P99999	0.171304	-0.029271	-0.0486348	0.0990795	-0.097949	-0.0299512	-0.0893933	0.0215531	-0.088128	-0.117612	-0.0925402	0.0856677	0.297523	-0.0547703	-0.0268774
Q8WUA4	0.143576	-0.0188348	-0.0202083	0.0499115	0.0258291	0.0462931	-0.115352	-0.0330527	-0.047936	-0.0570557	0.0512384	0.11484	-0.000286561	-0.123508	-0.0154545
Q92888	0.000894065	0.086116	0.0348106	-0.153935	-0.00573594	0.00475741	-0.0283681	0.131986	0.0174429	0.11033	-0.0428375	-0.0889778	-0.11121	0.11083	-0.0661025
Q7Z406	0.227119	0.1197	-0.440558	-0.106322	0.353046	-0.019122	-0.0620969	-0.026555	0.167395	0.305335	-0.455768	-0.491851	-0.141561	0.406371	0.164867
P08195	-0.0835637	-0.778325	0.281807	-0.255487	-0.341997	-0.0546417	-0.128873	0.0447124	-0.0253304	0.227019	0.951363	0.853201	0.320068	-1.28975	0.279794
Q9H089	0.118603	0.027693	0.146223	0.202139	-0.155645	0.0508811	-0.0594463	0.00307214	0.0509276	-0.0817078	-0.0490386	-0.00220173	0.0292256	-0.158199	-0.122526
Q9BQG0	0.103307	-0.203262	0.586505	0.295974	0.0168531	-0.207844	-0.107434	-0.269166	-0.209928	-0.351683	0.417914	0.4207	-0.104329	-0.278696	-0.108911
Q8IXI1	0.012722	0.0193928	-0.0695462	0.0155671	-0.0520626	-0.162176	-0.0664223	-0.0875427	0.0359492	-0.052926	0.0678983	0.253654	0.125257	-0.0753644	0.0355997
P31930	-0.0787942	-0.475006	-0.0364888	0.339623	-0.277124	-0.0408912	0.0518641	-0.031832	-0.0314767	-0.0803667	0.375912	0.381747	0.246571	-0.23377	-0.109968
O75165	0.174771	-0.0166014	-0.0277461	-0.151495	0.103982	-0.0868986	0.0830598	-0.14717	-0.0131712	-0.120339	-0.0669569	0.0675908	0.111561	0.0570225	0.0323916
Q9NX62	0.00792008	0.00415457	-0.0352923	0.0515768	0.0366522	-0.0522458	0.00825113	-0.0617273	-0.00943377	-0.260157	0.0212153	0.162036	0.111623	-0.0333494	0.0487766
Q9NSE4	0.158071	-0.343683	-0.299055	0.182707	-0.247038	-0.239107	-0.0264535	-0.053086	-0.0812311	0.0700313	-0.0232002	0.697434	0.440098	-0.227187	-0.00830031
Q06481	0.0357725	-0.0337484	-0.147282	0.0216144	-0.0567468	0.0673733	-0.0237515	-0.0518566	-0.0382202	0.148847	0.0635156	0.0640225	-0.0346514	-0.0473209	0.0324323
P35580	-0.0791378	0.515275	0.010876	-0.335005	0.12714	-0.177797	-0.155371	-0.0633546	-0.0624595	-0.0720875	0.167477	-0.329163	-0.141617	0.696664	-0.101439
P26639	0.204993	0.336376	0.147881	-0.412027	0.115288	-0.0247775	-0.00748147	0.242731	-0.172031	-0.19756	-0.0604945	-0.243868	-0.0268849	0.350855	-0.253
Q9Y6D9	0.0655324	-0.0736387	0.0690762	-0.0253062	-0.018512	-0.0330567	0.0967912	-0.0753565	0.0770994	0.0906061	-0.110199	-0.0388173	0.0654105	0.138558	-0.228187
Q9NZN4	0.0353229	-0.135412	-0.0336396	-0.181619	0.0062267	0.13964	-0.125028	0.117196	0.0318048	0.0728515	-0.115212	-0.133995	0.0451651	0.170833	0.105867
P40939	0.0301306	-0.592189	-0.319663	0.503426	-0.43404	-0.0850351	-0.207398	-0.208621	-0.178097	-0.0673138	0.604487	0.502377	0.499001	-0.246109	0.199044
O75027	-0.0301828	-0.1547	-0.0320246	0.0487172	0.00331725	0.0340536	-0.00583952	-0.134912	0.00504486	-0.0731341	0.121283	0.0896218	0.117696	-0.0777583	0.0888181
P36871	-0.0902497	-0.172337	0.0671696	-0.01456	0.0108406	0.111291	0.0841027	0.234025	0.196381	0.0694272	-0.11488	-0.202379	-0.288482	0.158768	-0.0491168
O00159	0.276648	-0.254716	0.0893919	0.0968326	0.0810938	-0.182626	-0.163744	-0.290899	-0.1462	-0.418548	0.132259	0.231876	0.40245	-0.0131126	0.159294
P17301	-0.368697	-0.245474	0.0144693	0.394138	-0.234865	0.0522075	-0.0738786	-0.0261778	-0.0118019	0.0869506	0.300744	0.320403	0.0102165	-0.125252	-0.0929814
Q8TAQ2	0.125891	-0.0347703	0.0126749	0.077236	0.141423	0.0101784	0.0921816	0.00602976	-0.0860376	0.0431509	-0.353359	0.116113	-0.124262	-0.00759261	-0.0188567
Q9NX24	-0.16533	-0.126155	0.00223573	0.109319	-0.0269271	0.0482765	0.107101	0.146611	0.133916	-0.0181202	0.028346	-0.0602315	-0.211341	0.00224443	0.0300557
Q9UBT2	0.210507	0.505552	0.144251	-0.510388	0.17183	0.113634	-0.0215901	0.101775	-0.124205	-0.177339	-0.0750602	-0.147989	-0.302935	0.330571	-0.218615
Q9NVM9	0.0486722	-0.0650704	-0.097931	-0.0688782	-0.000258165	0.0730304	-0.132679	0.0428657	0.0267253	-0.0413411	0.0117757	0.175693	0.00671683	0.0595873	-0.0389084
Q86VM9	-0.0322429	-0.111126	-0.13083	0.100961	0.0883371	0.12664	0.0159143	0.120012	0.0251557	0.0259779	-0.0751301	-0.175213	-0.0723586	0.072797	0.0211053
O60292	-0.137587	-0.0969925	-0.0744608	0.0724954	0.0426531	0.00743385	0.0539802	0.0401564	0.0301486	-0.00210889	-0.00244842	0.046422	-0.0472392	-0.0531747	0.120722
Q3SY69	-0.0737529	-0.102097	-0.0591592	0.021082	-0.00555984	0.0376728	-0.0738986	0.0429988	-0.0893828	0.163216	0.0509871	0.176089	0.135452	-0.193688	-0.0299592
O75891	-0.00144615	-0.0603964	0.0496624	0.0102659	-0.00761969	0.00578274	-0.260913	0.0392465	-0.00529876	-0.0453595	0.14087	0.0791283	0.114419	-0.0344672	-0.0238746
P46199	-0.0271921	-0.0568058	0.0250519	0.00913393	-0.0179671	-0.0353643	-0.0562432	0.0236911	0.0237387	0.0422951	0.0302721	0.0514213	0.0832652	-0.132176	0.0368794
Q92696	-0.140812	0.385549	0.0472512	-0.261846	-0.103703	0.131545	0.157763	0.180492	0.0967582	0.0311371	-0.232902	0.228795	-0.242336	-0.0961272	-0.181566
Q15014	-0.0803889	-0.00415198	0.061085	-0.0224107	0.0410818	0.0312545	0.0183135	0.0289211	0.0556984	-0.0639725	-0.0327429	-0.0520397	-0.0296881	0.0431102	0.00593023
P52434	-0.139815	-0.0111689	-0.0361671	0.0581852	-0.0596395	0.0431244	0.0397569	0.0987644	0.00338355	0.0228881	0.0216285	-0.0680873	-0.00225057	0.0458506	-0.0164535
Q8NI27	0.0920713	-0.295467	0.139022	0.04019	-0.0375408	-0.0375109	-0.0932206	0.0949796	-0.0523352	-0.00645085	0.17773	0.0350817	-0.0264389	-0.111538	0.0814273
Q9H223	-0.00313691	0.12988	0.135605	-0.0810715	0.266014	-0.0796118	-0.0839214	-0.0139172	-0.0414047	-0.0841015	0.0184894	-0.0978286	-0.0428807	0.0922867	-0.114402
P62263	-0.212088	0.297265	0.214694	-0.425253	0.00923355	0.121876	0.100556	0.20648	0.143073	0.181863	0.0110125	-0.650864	-0.305795	0.174835	0.133112
O60841	0.166029	0.43222	0.12419	-0.49895	0.23846	-0.150133	-0.00828346	0.00801325	-0.0489036	-0.0661722	0.0560117	-0.27845	0.0507469	0.186006	-0.210785
P31937	0.0453942	-0.144393	-0.0700682	0.57788	-0.13363	-0.158188	-0.0991685	-0.0193562	-0.0781947	-0.0013376	-0.0811262	0.125703	0.121062	-0.119487	0.0349104
Q9UKS6	-0.119844	-0.14448	0.0357713	-0.0160865	-0.00785607	-0.0290652	-0.02416	0.0809086	0.105588	0.0590091	-0.11456	0.070515	0.0803685	0.0444537	-0.0205624
O75116	0.0773964	0.23542	-0.169172	-0.110148	0.13039	-0.0732843	-0.136293	0.033215	-0.0250132	-0.0208337	-0.100821	0.0443916	0.0071986	0.108312	-0.000756967
O15027	0.316524	0.00887881	-0.0269903	-0.221668	0.155762	-0.0745495	-0.151615	0.0464486	-0.024255	-0.167976	0.369296	-0.138536	-0.0954522	-0.037752	0.0418849
Q86UU0	-0.0798293	-0.018818	0.04283	0.0326374	-0.0288023	0.013299	0.0474574	0.028336	0.0638957	-0.0128015	-0.00800103	-0.0478864	-0.0686138	0.011013	0.0252839
Q9NXE4	0.0270853	-0.0615928	0.0303938	-0.0517846	-0.0349359	-0.00466846	0.0135233	0.00902941	-0.00629974	-0.0150922	0.147416	0.121986	0.0355796	-0.159829	-0.0508106
Q8N1G2	0.0222266	0.112058	-0.0543412	-0.0385288	0.0855452	0.0342365	0.0769194	0.0552601	0.0369816	0.00147838	0.0594847	-0.179944	-0.0307536	-0.0488597	-0.131763
Q53F19	-0.0651042	-0.0195805	0.0358643	-0.0265095	0.0870246	0.0720289	-0.0655433	0.00781894	-0.103281	-0.0291577	-0.206008	0.0490302	0.121491	0.0716746	0.0702508
Q92900	0.1233	0.187491	-0.0912555	-0.453964	0.148295	0.013244	0.0198231	0.213949	-0.148055	0.0051685	0.0617757	-0.151117	-0.0285475	-0.0242284	0.124121
P08582	0.0336387	0.0819927	-0.128114	0.105689	-0.0848939	-0.0410897	-0.00201938	0.095058	0.0251924	0.0163438	-0.113562	0.141693	-0.107376	-0.0388329	0.0162795
P49959	0.131021	0.0439938	-0.0870083	0.228298	-0.0626113	-0.0113366	0.103585	-0.0115874	0.0371898	0.0119405	-0.144994	-0.121573	0.0182187	0.064391	-0.199527
P43686	0.344843	0.270506	0.169516	-0.335678	-0.0108816	0.0870376	0.0853266	-0.0234058	-0.102176	-0.250961	-0.116379	-0.0370483	0.0787026	0.0961975	-0.255598
Q15019	0.270693	0.493143	-0.217205	-0.182819	0.0936419	-0.156349	-0.088891	-0.0353135	-0.0701441	-0.124647	-0.313781	-0.111311	0.0373318	0.490415	-0.0847625
Q16181	-0.0722077	0.287339	-0.0255009	0.00236114	0.0714374	0.0787641	0.0503679	0.0505064	0.0194472	-0.00363043	-0.323888	-0.286741	-0.184098	0.458877	-0.123034
Q9UKX7	-0.0106161	0.123602	-0.0860152	-0.198962	0.128339	0.0834155	0.146304	-0.0463301	-0.0902518	0.0519813	-0.0948051	0.0789879	0.0368527	-0.0164989	-0.106003
O43493	-0.126758	-0.0818994	-0.00783962	0.0913204	0.0633721	0.0344115	0.0685462	0.0893032	0.0720232	0.0289553	-0.0875824	-0.135171	-0.0728635	0.0340309	0.0301517
P84090	-0.16124	-0.16808	-0.0573516	0.436755	0.000956103	-0.0158129	0.0226369	0.0962801	0.170658	0.207286	-0.138048	-0.0957692	-0.0865709	-0.217594	0.00589323
Q9H9B1	0.0174761	-0.129697	-0.0307351	0.0805685	-0.0668698	0.0434236	0.0109205	0.0187133	0.0530405	0.073158	0.0328214	-0.0502563	-0.101426	0.045707	0.00315542
Q15059	0.0892546	-0.0244147	-0.0410843	0.109189	0.0565633	-0.0576658	-0.0809557	0.103619	-0.162423	-0.0831333	0.0551201	0.108187	-0.031788	-0.0225235	-0.0179444
O00214	-0.0103635	-0.0318256	-0.00908201	0.072851	-0.0286016	-0.0181004	0.0343514	-0.0341727	0.0107429	-0.149402	0.0376743	0.130019	0.0621769	-0.022095	-0.0441728
O14776	0.0295956	0.137853	0.0836594	0.0987911	-0.143122	-0.0875774	-0.0974297	-0.0901324	-0.0733372	-0.0945813	-0.0283143	0.0645323	-0.0429363	0.223491	0.0195081
P46013	0.0190023	0.160344	0.0821163	-0.633053	0.0460606	-0.197759	-0.130444	-0.0110537	-0.0376654	0.0325778	0.14787	0.15985	-0.13477	0.00987265	0.487053
Q08945	0.415215	0.154295	-0.0995049	-0.00799081	-0.31764	-0.0362715	-0.2119	-0.0400569	-0.0300676	0.0746787	0.294456	-0.12874	0.124718	-0.0770681	-0.114123
Q8IY17	-0.126849	-0.0474002	-0.0495188	-0.0499365	0.0641218	0.0569056	-0.00744733	0.0792487	-0.0254872	0.100677	0.100037	0.0710517	-0.076589	0.0530546	-0.141868
Q92542	-0.0230545	-0.158798	-0.25142	0.283268	-0.0963531	0.00683497	0.000593333	0.00393923	0.0354986	0.0493734	-0.152076	0.202596	0.112712	-0.058506	0.0453917
Q9Y6E2	0.0551187	-0.122217	0.101592	-0.187545	0.117802	0.0775549	0.0424053	0.146302	-0.00941832	0.0964392	-0.0916275	-0.208268	-0.191314	0.141451	0.0317249
Q8IXM2	0.0617513	0.037423	-0.114719	-0.0895943	-0.0192591	0.0697116	-0.0505735	0.0173775	0.133135	0.0771821	-0.0918994	-0.0226707	0.043955	0.0259459	-0.0777651
Q9UDY2	-0.191612	-0.152222	0.413798	-0.338891	0.324931	0.0253237	-0.0108247	0.045756	-0.0428971	-0.204736	0.0969326	-0.151182	-0.0279197	-0.027067	0.24061
P08243	-0.00983755	0.233659	0.125818	-0.389485	0.00203541	0.10357	0.0933923	-0.00788962	0.0253352	0.0344438	0.152	-0.132252	0.0457355	-0.152054	-0.12447
O43633	-0.228833	0.0765074	-0.0288903	0.00319151	0.144614	-0.0957279	0.0586796	0.0912414	0.11064	0.0487546	-0.194999	-0.0739439	-0.0201389	0.0899457	0.0189601
P18858	0.264557	0.300415	0.0574261	-0.164372	0.114059	-0.0171833	-0.0541553	-0.017498	0.0737822	0.0986225	-0.250221	-0.23966	-0.0860144	0.178603	-0.25836
Q969G3	0.0517966	-0.106893	-0.0604433	0.326753	-0.195106	-0.00306604	-0.0711023	-0.0214466	0.00532927	0.00364798	0.0412149	0.0655505	-0.0509527	0.0222284	-0.00751122
O60220	-0.0212698	-0.0857498	0.00425228	0.0517328	-0.223993	0.0393208	0.0556876	-0.00471024	-0.0444948	-0.0185634	0.194165	-0.00909966	0.0567477	-0.0214658	0.0274403
Q5T8P6	-0.039242	0.127882	0.0232059	-0.010185	0.0444114	0.026632	0.0406586	-0.0408319	0.0138792	0.0116649	-0.0318422	-0.0645982	-0.0911031	-0.00851201	-0.00201935
P08729	0.614132	-0.919575	-1.58369	1.61384	-0.155166	0.098568	0.0235676	0.307367	-0.00999809	-0.1322	-1.38609	-0.41591	-0.145611	0.932881	1.15788
Q16512	0.0187975	-0.0644881	-0.00989424	0.00141655	0.00541317	-0.0164462	0.0418292	-0.00410591	-0.00281721	0.0368583	-0.00352771	0.034626	-0.0052263	0.0230798	-0.0555149
Q9GZR7	-0.141618	-0.0998389	0.242015	0.0696987	-0.100572	-0.0411711	-0.137652	-0.0645727	-0.0249081	-0.225571	0.104526	0.176977	0.0416898	0.0300862	0.170911
P04264	0.246502	4.29463	-0.378377	-0.490044	-0.0102051	-0.295222	-0.427378	-0.298817	-0.374247	-0.316239	0.20475	-0.860871	-0.109399	-0.887424	-0.297655
P05787	0.449348	-1.06225	-0.582496	0.90609	-0.390147	-0.126549	-0.528075	-0.776688	-0.69831	-0.896856	-0.319767	0.799223	1.35123	0.614622	1.26063
O95340	-0.0246647	0.129083	-0.0433865	-0.0842961	0.0239319	-0.00132781	0.00335652	-0.0636079	-0.00145143	0.0527252	-0.0358384	0.0439799	0.0190347	-0.0404	0.0228621
P25686	-0.0215269	-0.00551276	-0.0250891	0.072807	0.0424586	0.0156918	0.0446326	0.00747019	0.093482	-0.0210869	-0.0333452	-0.131354	-0.0582648	-0.0127899	0.0324272
Q6L8Q7	-0.0221972	-0.00835936	0.13546	-0.13758	0.0296014	0.0074361	0.0942251	-0.0359949	-0.0829033	0.0601702	-0.0309789	-0.00362456	0.142473	-0.0495454	-0.0981816
P21333	0.573418	1.76375	-0.0664016	-1.53858	0.236362	-0.232636	-0.113007	-0.215954	-0.144849	-0.103755	-0.288234	-0.939474	-0.148059	1.27034	-0.0529151
Q99470	-0.00299441	0.0274137	0.0334486	0.0184317	0.0392069	-0.140633	0.0322974	0.0230619	0.0753708	-0.0876212	-0.0545275	0.05799	0.0649859	0.0419546	-0.128386
P82933	0.0515205	-0.163376	0.0283767	0.258998	-0.0381593	0.00101037	-0.134408	-0.170787	-0.0272352	0.0266198	0.140809	0.0623934	0.147142	-0.117615	-0.0652882
Q9NVT9	-0.0507706	0.0181623	0.0377454	0.00327288	0.0198457	-0.0326234	-0.000636761	0.0491504	-0.07158	0.0245474	-0.0899571	-0.109104	0.0486073	-0.0212999	0.174641
Q9H583	0.0454381	-0.118281	0.310707	-0.258789	-0.0838531	-0.0199869	-0.0709978	0.0201794	-0.120169	-0.255543	0.495144	0.264669	-0.00320898	-0.141582	-0.0637271
P23229	0.0397532	-0.165985	0.470999	-0.0710923	-0.0867391	-0.0679641	0.00140212	0.0179975	0.0149192	-0.00623313	0.0177365	0.0307786	-0.106429	-0.100863	0.0117198
Q8TEM1	-0.00246006	-0.212541	-0.341139	-0.176977	-0.0861321	0.0921057	0.0582763	0.133921	0.0525746	0.0890515	0.017424	0.102537	-0.0188876	0.189268	0.102979
P00505	-0.518909	-1.08433	-0.0185138	0.825501	-0.443384	0.048143	0.122473	0.190772	0.154588	0.175777	0.725615	0.344794	0.249306	-0.804617	0.0327865
P08514	0.0417256	0.0133157	0.0129798	-0.0557101	0.0252532	0.0609193	-0.127926	-0.00697757	0.0125677	0.0208302	0.018979	0.0581416	-0.0389722	0.0208637	-0.0559895
Q9UBE0	0.126817	0.361256	-0.07939	-0.449508	0.245864	0.0500427	0.120515	0.101871	-0.263434	0.0883641	-0.212067	-0.265024	-0.104164	0.296514	-0.0176576
Q02790	-0.0748077	0.219593	0.237993	-0.404876	0.201255	0.111687	0.0432777	0.158741	0.0217787	0.0366136	-0.15237	-0.305328	-0.189294	0.218272	-0.122535
P19105	0.157046	0.140778	0.0749413	0.110529	0.0573452	-0.0205168	-0.0500022	-0.00620951	0.118369	0.00585348	-0.261334	-0.0997028	-0.0170227	0.00972378	-0.219798
P56937	-0.155817	0.0408517	0.0376305	0.0698374	-0.027756	0.0518586	-0.0403172	-0.0389983	-0.0110418	0.032863	0.0407436	0.0278881	0.071466	-0.00226536	-0.0969437
Q14566	0.231519	0.0945447	0.0463772	-0.148231	-0.0549783	0.0400155	0.148016	0.265847	0.220888	0.0767646	-0.21523	-0.474065	-0.319133	0.125759	-0.0380934
P28340	0.345242	0.0863692	0.0158068	-0.455821	0.0639956	-0.15415	0.0286122	0.0959312	-0.00564187	0.0462252	0.00445561	-0.111612	-0.0929801	0.238109	-0.104541
Q9BUJ2	0.02131	-0.390711	-0.136613	0.432444	-0.00587433	0.146879	-0.0350957	0.0539725	0.111142	-0.113189	-0.0655587	0.0859633	0.0892316	-0.211647	0.017746
Q15257	0.0279211	0.152284	0.00598122	-0.116752	0.066985	-0.0440763	0.0759908	0.0752354	0.068065	0.0809681	-0.101959	-0.171529	-0.0673945	0.0155112	-0.0672321
P48163	-0.057573	0.085059	0.00947944	0.00233238	0.055919	0.0307766	0.022927	0.00461875	0.0271255	-0.0364755	-0.0273805	-0.0919493	-0.0459871	0.0153934	0.0057343
O75153	-0.0380913	0.224699	0.196325	-0.22454	-0.0120259	0.0308833	0.0205269	0.149835	0.0750384	-0.0618041	-0.0353164	-0.15735	-0.019653	-0.0643375	-0.0841889
P04818	0.00768232	0.0854364	-0.0287013	-0.0830272	0.0145366	-0.0452202	-0.0836971	0.095959	0.000747531	-0.0307149	0.133917	-0.0989447	-0.0999339	0.0391565	0.0928036
Q6ISB3	0.0734575	0.0892712	0.0252649	-0.141213	0.0454817	-0.074503	0.030418	-0.106363	-0.00663465	0.00949867	0.0527909	-0.0458378	0.0531573	-0.0563778	0.0515882
O75347	-0.0581796	0.261347	0.0272719	-0.173491	0.143318	0.00422986	0.0889924	0.142989	0.000176526	-0.0148554	-0.143237	-0.202334	-0.0342151	0.0130797	-0.0550921
O75147	-0.0353618	0.0884466	0.109732	0.0500834	0.0125051	-0.0508355	-0.0516045	-0.0169491	-0.0313609	0.0607444	-0.0243999	0.0096184	0.0369619	-0.125553	-0.0320264
P07355	0.543543	-0.444859	-0.0480229	-0.0264536	0.307293	-0.295986	-0.216114	-0.39974	-0.0439108	0.335561	-0.365319	-0.536463	0.389593	0.287442	0.513435
P19823	-0.0158462	-0.0856494	0.0536054	-0.035154	0.101446	-0.0188155	-0.0446051	0.0118524	-0.0390285	-0.0143054	0.0284947	0.0202197	-0.103815	0.0607929	0.0808076
P49792	0.171391	-0.215507	-0.0194621	0.147035	0.0850028	-0.191867	-0.0600397	0.0300532	-0.213606	-0.208808	0.162457	0.321365	0.0964897	-0.141837	0.0373335
P15880	-0.00162656	0.32502	0.341206	-0.342019	0.0277219	0.0171351	0.0455814	0.0774095	0.0754576	-0.0622241	0.343371	-0.836735	-0.309448	0.31522	-0.0160704
Q9BSJ8	0.322625	-0.180043	-0.249153	0.176752	-0.23734	-0.100816	-0.0441779	-0.0727684	0.0126855	-0.00864263	0.21995	0.243021	0.115124	-0.157031	-0.0401853
P12004	0.465835	0.892204	-0.147658	-0.281592	0.0890918	0.0857997	-0.150711	0.111365	0.159519	0.139326	-0.636656	-0.683088	-0.284654	0.542197	-0.300979
Q9Y6G9	-0.0991748	0.228412	-0.0367834	-0.110672	0.04648	0.0768737	0.014989	-0.0585604	-0.0237493	-0.0835267	-0.0119302	-0.0303015	0.057773	0.0615259	-0.0313551
Q13268	-0.060854	-0.0828679	1.03818	0.156967	-0.207585	-0.111532	-0.0871255	-0.133376	-0.104574	-0.0894179	-0.258273	0.162313	0.0981972	-0.0945808	-0.225475
Q02241	-0.187243	0.13437	0.0556281	0.21414	-0.0416538	-0.166122	-0.0646816	-0.0211671	-0.0982854	-0.0951093	0.0607736	0.0489955	0.159621	-0.058952	0.059686
P05556	-0.357208	-0.440737	-0.230113	0.673689	-0.167318	0.114227	0.0809232	0.126487	0.121688	0.132843	-0.235535	-0.0733152	0.0434658	-0.055879	0.266784
Q9HBH5	-0.045073	-0.233609	-0.0713471	0.0905794	0.00877074	0.0467873	-0.0489042	0.0334427	0.0286186	0.0580167	0.027999	0.067398	-0.0112368	-0.00211353	0.0506711
Q13033	-0.0266134	-0.031851	-0.030877	-0.0207461	0.158083	0.0358242	-0.00312352	0.0216275	0.0737165	0.0165187	-0.0983215	-0.0841315	-0.0342016	0.0488429	-0.0247474
Q14789	-0.285668	0.00691441	0.0406409	-0.209865	0.194641	-0.0863164	0.133501	0.0694368	0.286234	-0.14156	-0.0485246	-0.0338859	-0.246051	0.206763	0.11374
O15031	0.115482	0.0188866	-0.275176	0.167898	0.0543679	0.0263754	-0.149857	-0.080334	-0.000318457	-0.0600833	-0.0342708	0.141152	-0.0309559	-0.0979983	0.204832
O75683	-0.191634	-0.00563385	-0.0387731	-0.323286	0.0277299	0.131451	0.0927568	-0.00367383	0.117184	0.0284073	0.0804392	0.000346365	0.00785454	-0.0432889	0.120121
Q13428	-0.303369	-0.0445534	0.0435263	-0.237203	0.241099	0.235382	0.0689936	0.131536	0.196598	0.0281633	-0.184643	-0.261745	-0.373104	0.241732	0.217588
P27824	-0.311166	-1.19072	0.330091	1.11362	-0.42835	-0.0489706	0.0179955	0.07138	0.086129	-0.334579	0.583983	0.575612	0.207606	-0.482459	-0.190181
P11234	-0.0338576	-0.031679	0.0712779	-0.0503769	0.0299143	0.00244705	0.120875	0.00166919	0.139649	-0.0537731	-0.0673582	0.0470465	0.1078	-0.128012	-0.155622
P13674	-0.0523422	0.111082	-0.166681	0.241448	-0.10297	-0.0176711	-0.044317	-0.072934	-0.130902	0.0490331	-0.0712333	0.118202	0.119816	-0.0387362	0.0582053
Q9UJU6	-0.0687124	0.205343	-0.17691	-0.062495	0.119534	0.0119087	-0.0461372	0.0915067	0.0482096	-0.113208	-0.062977	-0.145395	0.1491	0.0990866	-0.0488538
Q9UQE7	-0.111844	-0.34995	-0.0952869	0.439871	-0.137058	-0.0711887	0.0352023	0.0497316	-0.174928	0.249937	0.0413419	0.198286	-0.0368956	-0.0232981	-0.0139192
Q14738	0.020995	0.0938642	0.00150653	0.0285525	0.085897	0.00190452	0.00377131	0.00872635	-0.030783	-0.038253	-0.0041611	0.0226282	-0.0961351	-0.106362	0.00784911
Q9NRX1	0.0817014	0.133072	-0.0992772	-0.210129	-0.0548241	0.0189562	0.0441539	0.0965483	0.0100658	-0.0474848	0.12177	-0.0249615	-0.0586573	-0.0832578	0.0723234
P49588	-0.040636	0.364138	0.168404	-0.520695	0.250967	0.118473	-0.0314551	0.0704621	0.0670497	0.0485185	-0.00757876	-0.270314	-0.106586	0.0849171	-0.195665
Q8IXI2	0.0838622	-0.0117087	-0.0360866	-0.134562	-0.016977	0.0324946	0.0270668	-0.0180039	0.0103983	0.0073262	0.00511179	0.0368146	0.103506	-0.0125582	-0.0766846
P17480	-0.0753556	-0.0243364	-0.248995	0.2615	-0.0151387	-0.0187986	-0.0327746	-0.0551259	-0.130066	0.00370162	0.116821	0.0807472	0.0855473	0.191886	-0.139611
Q04323	-0.1256	0.167675	0.0106714	0.0711847	0.0991084	-0.0289991	0.0197352	0.0746586	-0.0683098	-0.00971606	-0.0149742	-0.0286307	-0.100623	0.108778	-0.174959
P09110	0.0764507	-0.0918511	-0.101191	0.229705	-0.163408	0.0825698	-0.0624382	0.030748	-0.166601	0.0176045	0.207426	0.127997	-0.0526536	-0.0650093	-0.0693495
Q14257	0.0190527	-0.233284	-0.0985013	0.225016	-0.137386	-0.0120086	-0.0075522	0.0195713	0.0221066	-0.0347113	0.184201	0.0717433	0.15202	-0.0772731	-0.0929942
O00429	-0.0533986	0.149582	0.119807	-0.213613	0.0801838	-0.0684045	0.0518043	-0.0516858	0.0414421	-0.00701836	-0.0831934	0.0346912	-0.084824	0.159965	-0.0753373
Q96TC7	-0.00526993	-0.100785	-0.0207035	0.0461331	-0.0470031	0.0185805	0.0107627	-0.0252252	-0.0175838	-0.0172689	0.133325	0.0862676	-0.101398	-0.0332288	0.0733976
P62993	0.094751	0.155801	-0.105657	-0.09773	0.156101	-0.0415548	-0.148918	-0.0256408	0.114033	-0.0569669	-0.144717	-0.139928	0.0895166	0.11752	0.03339
Q587I9	0.0406017	0.0243272	-0.00360927	-0.000335816	-0.0877174	-0.00480172	0.038785	0.018379	0.0552894	0.0429317	0.00685	-0.0132108	0.00220767	-0.0100865	-0.10961
P67936	-0.0404412	0.295071	0.179561	0.0130698	-0.0663153	0.120866	0.114798	0.152331	0.0630354	-0.0650752	-0.322184	-0.509932	-0.251248	0.416251	-0.0997879
Q86XL3	0.0579527	-0.120482	-0.128584	0.031467	0.0407393	0.0444006	0.0646631	-0.0583225	-0.0248421	0.000202949	-0.00272798	0.0835357	0.0169855	0.0297003	-0.0346882
P11387	-0.526754	-0.34484	-0.367786	0.393895	-0.47482	-0.187132	-0.116058	0.144166	0.226384	0.276512	0.67505	0.286123	0.238415	-0.361241	0.138086
Q8NBN3	0.00672477	-0.0335805	-0.0897414	0.0357954	-0.11755	0.0910376	-0.0371699	0.0136924	0.0557851	-0.0122127	-0.0330544	0.0601977	0.0647835	-0.0158645	0.0111567
Q9BYN8	-0.106578	0.022767	-0.0372842	0.304773	-0.200284	0.0547043	0.0810346	0.0362454	0.106851	0.056832	0.107076	-0.0942823	0.0940744	-0.0964055	-0.329525
Q8IU81	0.0539105	0.0148577	-0.0158652	-0.0616378	-0.0274454	0.104737	0.00744918	0.0590658	-0.0256742	0.0293553	-0.0327112	-0.0772927	-0.0285707	0.109964	-0.110142
P52565	-0.0109724	0.232873	-0.01155	-0.35656	0.144984	0.0926281	0.0796815	0.0973573	0.0304546	-0.00255814	-0.141804	-0.0800386	0.0249297	-0.0825399	-0.0168859
Q9Y2W1	-0.530716	-0.129572	-0.133529	0.295644	-0.0710183	0.00802529	0.223129	-0.00217023	0.291154	-0.0151979	-0.295749	-0.00217738	0.134687	0.0756038	0.151886
Q96B26	-0.0251844	-0.116856	0.0550395	-0.192008	0.0124851	0.0208983	-0.0755564	0.116759	0.0508406	0.107288	0.109082	-0.024191	0.104347	-0.216071	0.0731281
Q8IWS0	-0.0846428	0.0205064	-0.0879255	-0.0128654	-0.00259756	0.0300495	0.110834	-0.0445025	0.105468	-0.0546101	-0.0514809	-0.0232139	-0.00839851	0.0527976	0.0505817
Q6UN15	0.023157	0.0901826	-0.174077	-0.2078	0.0217973	0.0249369	0.0370475	0.00996317	-0.0186038	0.0188871	-0.0846069	0.106012	-0.0126274	0.0410956	0.124635
O60307	0.027151	0.060451	-0.00530147	0.0130824	-0.00605291	-0.018022	-0.00679199	-0.00876342	-0.0109573	-0.00730495	-0.00576778	-0.0215148	0.00835387	-0.0169135	-0.00164816
Q9UBB4	0.0264244	0.342865	0.0886043	-0.194235	0.00125591	0.0153842	-0.00785607	-0.21239	-0.0989735	0.0840998	-0.0236033	0.0100539	-0.0132401	-0.0738288	0.0554392
P16219	-0.00624839	0.00621635	-0.0544891	0.189193	-0.146107	-0.0509137	0.0508565	0.0951516	-0.011425	-0.0392117	-0.0106068	0.0368521	-0.0459383	-0.0336878	0.0203586
Q00839	0.349227	-0.0186757	-0.107679	-0.388084	0.197981	-0.235846	-0.498106	-0.367405	-0.238467	-0.0344753	-0.286113	1.21806	0.89882	-0.669728	0.18049
P18433	-0.0446807	-0.0308087	0.073832	0.0796152	-0.0830232	0.00428404	-0.00650348	-0.0110852	-0.0480617	-0.0602602	-0.0140557	-0.0799785	0.0252164	0.141717	0.0537932
Q9BX68	-0.0232688	-0.104282	-0.206393	0.330156	-0.10341	0.0502992	0.0762588	0.0155401	0.0604501	0.0131686	-0.10114	0.0901951	0.0699548	-0.110043	-0.057486
Q8WWM7	-0.0671171	0.0292014	0.0537764	-0.199436	-0.0345335	0.0808128	-0.0487188	0.0398464	0.165084	0.0599429	0.0195643	-0.25927	-0.143852	0.189217	0.115483
Q0VD83	0.052077	-0.0737909	-0.0173916	0.0925479	0.000317816	0.00806773	0.000759329	0.00797717	0.0481459	0.107856	-0.216035	-0.0179471	0.0608919	-0.0241229	-0.0293537
P10645	-0.0813354	-0.0380017	-0.0459736	0.118889	0.0142391	0.00294201	0.0134942	0.0337998	0.0443444	0.00884308	-0.118176	-0.010573	-0.0149912	0.0435024	0.0289962
Q9NVI7	-0.0379404	-0.184325	-0.0829137	0.382584	-0.0794888	-0.0822057	-0.00909184	-0.0834387	-0.00666148	-0.140759	0.377112	0.0871817	0.0703074	-0.0468617	-0.163498
P14735	-0.117619	0.129518	0.107361	-0.171857	0.0387288	0.0597527	-0.0285057	0.0362675	-0.0571363	0.0376711	0.0597863	-0.0281812	-0.0387989	0.0361527	-0.0631397
P14618	0.397739	1.46644	-0.0752077	-1.95666	1.13175	0.0117195	0.032126	0.104967	-0.172264	0.0352538	-0.557006	-0.423371	-0.299988	0.457456	-0.152963
Q9NZB2	0.0279156	0.0335027	0.204521	0.0256543	-0.0793136	0.0505272	-0.0630456	0.04978	-0.114012	-0.308202	-0.00299492	-0.122872	0.018032	0.235879	0.0446288
P14854	-0.209165	-0.304156	0.0935436	0.576664	-0.0731964	-0.0272786	0.0155918	-0.266156	0.129128	-0.128897	-0.0220903	0.0303768	0.071325	0.122126	-0.00781535
P29590	-0.0665554	-0.22718	0.214875	-0.0163578	-0.0771918	-0.0796437	0.0464839	-0.0314994	0.03738	0.0944659	0.0763015	-0.102719	-0.0777179	0.104489	0.10487
P20700	0.18279	-0.736912	-0.727435	0.531148	-0.140676	0.128376	0.164381	0.132722	0.403026	0.0496703	-0.609645	0.146755	0.134328	0.114855	0.226616
Q01082	0.504065	-0.303097	-0.131812	0.336183	-0.250045	-0.0392214	-0.155879	-0.0671603	-0.272936	-0.137414	0.244562	0.286783	0.263795	-0.287197	0.00937165
O95394	-0.0844923	-0.0151184	0.0103726	-0.0541592	0.124113	0.000353356	0.0632375	0.00588755	0.052642	-0.027702	-0.138734	0.0492909	-0.0328821	0.0842496	-0.0370586
Q9UH99	0.205048	-0.191043	-0.176467	0.186665	0.0331236	-0.0349881	-0.0740992	-0.165914	-0.152828	-0.153545	0.106213	0.194509	0.19908	-0.00329828	0.0275448
Q14315	-0.122124	0.30286	0.177347	-0.571455	0.454093	-0.103582	-0.0416159	0.196836	-0.124732	-0.00438386	0.304195	-0.575833	-0.313306	0.05444	0.367261
Q6UB35	-0.0528023	-0.265226	-0.0131798	-0.152758	0.10328	-0.0138069	0.0659232	0.00956086	0.0214082	-0.0490018	0.403089	0.223512	-0.0611235	-0.145974	-0.0729012
Q99805	0.0751273	-0.207626	0.0662625	-0.208813	-0.0798291	-0.158548	-0.0471899	-0.11278	-0.121607	-0.0516785	0.359569	0.259743	-0.0597683	0.134364	0.152774
Q13151	-0.0860424	-0.301039	-0.00431932	0.21237	0.0801792	0.0396751	0.0540469	0.0809797	-0.00783954	-0.207728	-0.0439397	-0.00437673	0.0339965	0.0624354	0.0916017
Q9BXP5	0.0953892	-0.349082	0.0771915	0.1081	-0.0610448	-0.045589	0.0651803	0.199527	0.235932	-0.190041	0.0709752	-0.157864	-0.181896	-0.0452151	0.178436
O14578	-0.0408681	-0.147373	-0.0145556	0.0517329	-0.0494885	0.00854145	0.0507773	0.0473695	-0.0330235	0.0510991	-0.109503	0.167711	0.059997	-0.0592049	0.0167881
P33991	0.442969	0.145534	0.241566	-0.430499	-0.0593	0.0179716	-0.0564282	-0.0564869	0.0148703	0.00299008	-0.169342	-0.356941	-0.114933	0.397408	-0.0193789
Q96SB4	0.0415137	0.0583344	0.10847	-0.165385	-0.0023918	0.0290264	0.0172963	-0.135006	-0.0327946	0.0425719	0.0380983	-0.047622	0.0122456	-0.115963	0.151606
P24928	0.136913	-0.295406	-0.158174	-0.0116765	-0.0492353	0.197826	-0.0350986	0.108001	-0.188957	-0.04864	0.0694183	-0.0132111	0.304879	-0.195393	0.178754
Q9H993	0.131106	-0.0446312	0.0871801	-0.105336	0.0790688	-0.109512	-0.0382554	-0.0457232	0.0184802	-0.0193096	-0.117045	0.0728873	0.0544073	0.0960145	-0.0593327
P41250	-0.0703592	0.275541	0.226067	-0.372816	0.109131	-0.00755396	0.0992996	-0.0405079	-0.179781	0.047219	0.213659	-0.0710991	-0.165023	0.0196439	-0.0834198
P31939	-0.00174575	0.573876	0.142051	-0.543827	0.210995	0.0127583	0.0265346	-0.105722	0.18105	-0.0192503	-0.171946	-0.18759	-0.109626	0.0521543	-0.0597105
Q14697	0.258182	-0.294622	-0.244715	1.18923	-0.464017	-0.412119	-0.405217	-0.426832	-0.248254	0.0328285	-0.510165	1.15254	1.01504	-0.245167	-0.396709
Q9BUL8	0.0873732	0.17042	-0.0815443	-0.0620245	0.0549533	0.036107	0.0446952	0.01607	-0.0634469	-0.00225319	0.0232306	-0.136042	-0.162986	0.169631	-0.0941837
Q9NQ29	-0.00637629	-0.00859851	0.0271604	-0.088981	0.00524398	-0.0289606	0.0364234	0.0360204	0.0447443	-0.0213915	0.0980309	-0.101236	-0.0200938	0.00224767	0.0257669
Q13200	0.117344	0.2686	0.321583	-0.650865	0.131051	-0.174213	-0.013853	-0.089299	-0.00778491	0.0500034	0.0669985	0.0097435	-0.0144015	0.151859	-0.166765
Q12797	0.0142524	-0.101967	0.0285189	0.174386	-0.0241359	0.100798	0.17948	0.173205	0.135036	-0.237626	0.0911791	-0.261728	-0.149182	-0.0932163	-0.0290009
P23246	-0.472384	-0.734895	0.220906	-0.188111	-0.222683	0.243819	-0.318676	-0.170535	0.103211	0.238972	0.387021	0.0703162	0.211324	-0.0942035	0.725918
Q8WXF1	0.157296	-0.184962	-0.0601173	0.0759435	-0.245492	0.0328416	-0.0403033	0.08493	-0.0131884	-0.0877038	0.383318	0.134725	-0.170738	-0.032771	-0.0337788
Q13523	0.0683091	0.0191513	0.00820277	0.212706	-0.0535953	-0.0466072	-0.0992126	-0.0951632	-0.120534	-0.113417	0.216407	-0.0401585	0.121272	-0.0840923	0.00673132
Q9Y3X0	0.00852364	-0.0801315	0.019487	-0.112535	0.0100012	-0.0237046	-0.0125648	0.00241287	0.0136635	-0.0103815	0.023523	0.0299299	0.0601252	0.0022229	0.0694284
P22223	-0.0543181	-0.0758085	-0.0477884	0.131253	-0.165862	0.0431288	-0.00711282	0.00577272	0.0329014	-0.00992372	-0.0425858	0.135844	0.0644048	-0.0271552	0.0172499
Q3KQU3	0.0575339	0.179383	-0.060945	-0.163694	0.0343969	-0.0173201	-0.021938	-0.00159301	0.020275	0.0494612	-0.0224986	-0.108913	-0.0323226	0.0743036	0.0138706
Q9BYT8	0.0222054	-0.00852746	0.0524384	-0.150305	-0.00996334	-0.089355	0.0174344	-0.035934	0.0180524	0.0697152	0.151807	-0.0514721	-0.0706115	0.0795595	0.0049562
Q13907	0.109055	0.104333	-0.0846913	-0.0372235	0.0675204	-0.0775578	-0.0252374	0.0665438	0.0286222	-0.122271	-0.113144	-0.0298542	0.00711873	0.0941809	0.0126053
Q9UNQ0	0.0373509	-0.00365235	-0.111415	-0.105381	-0.0265435	-0.0108551	0.00378305	0.00664919	0.016097	0.0133313	0.0353896	0.0694773	0.0235102	0.0332212	0.0190376
Q9HB71	0.0194727	0.421707	0.034471	-0.492652	0.124012	0.0139457	0.071228	0.0266364	-0.044179	0.0711422	-0.115274	-0.19233	-0.0961406	0.29239	-0.13443
Q12981	-0.107245	-0.0583452	0.016685	0.0375135	-0.0670885	0.0842268	-0.0265632	0.00813838	0.0326124	0.151138	0.0271297	0.0819349	0.0059734	-0.104734	-0.0813759
P05455	0.330672	0.184581	0.265145	-0.280697	-0.0378799	-0.0732222	-0.137749	-0.0500614	0.0560199	0.105101	0.106775	-0.33599	-0.284297	0.342801	-0.191198
Q8TF05	-0.358485	-0.0440909	0.118865	0.192361	-0.0588479	0.147359	0.102426	-0.01671	0.00155964	-0.00283254	0.0934259	0.0445846	0.0628157	-0.16642	-0.116011
Q9UI10	-0.172931	0.128535	0.0330026	-0.0673067	0.0959455	-0.0702278	-0.0121711	0.045677	-0.0456093	0.0142383	-0.0270122	-0.042384	-0.00184089	0.0855888	0.0364959
P02647	-0.115993	-0.139031	0.0473889	-0.0916115	0.984756	-0.058577	-0.128308	-0.0788874	-0.0144381	-0.0550758	-0.0191596	-0.047689	-0.129456	-0.146528	-0.00739146
Q6WKZ4	0.100197	0.146774	-0.0724543	0.126318	0.0708713	-0.150301	-0.0676365	-0.0521211	0.0131304	-0.091044	-0.132332	-0.0433811	-0.0105192	0.025522	0.136975
O00231	0.213821	0.442375	0.0689062	-0.309502	-0.0932561	-0.236892	-0.0237438	-0.0640448	0.083672	0.0769271	0.145282	-0.12521	0.163419	0.0179959	-0.359749
P33121	-0.0745159	-0.237666	0.15635	0.203968	-0.0931469	-0.0633993	-0.0557733	-0.0773524	-0.259492	-0.0685393	0.0370806	0.253601	0.0301187	0.159237	0.0895301
Q14247	0.114918	0.192481	0.0357178	-0.244099	-0.228758	0.0210444	0.108327	0.217705	0.182631	-0.1596	-0.107305	-0.151152	0.0904424	0.228107	-0.30046
P42566	0.00967533	0.112597	0.00744728	-0.00368561	-0.0865883	0.014014	0.0134973	-0.0186055	-0.0193304	-0.0346924	0.119261	-0.0211793	0.0270406	-0.0275129	-0.0919385
Q9UPN3	-0.171243	-0.333079	-0.0199445	-0.0802916	-0.135167	0.164051	0.0857646	0.242056	0.0394428	0.002046	-0.191457	0.0725102	0.16265	0.0681502	0.0945125
Q8WZ82	-0.0227496	-0.0240594	0.0265603	-0.00674891	0.00395202	0.00526831	-0.0267617	0.0685648	-0.00179987	0.0169112	-0.0297607	-0.00296977	-0.0431472	0.0322214	0.00451903
Q02252	0.0300926	0.0138243	-0.29557	0.0997018	-0.00591041	-0.0827128	-0.0762493	-0.0117862	0.0152773	0.347208	-0.0966136	0.105691	-0.0407892	0.0140539	-0.0162183
O60610	0.00160176	-0.610127	-0.105743	-0.0614576	0.2247	0.0721073	0.0845896	0.0634701	0.276489	-0.0942275	-0.076008	-0.241832	-0.05779	0.39618	0.128047
Q9HBR0	-0.0119243	-0.0678997	-0.0557141	0.0325072	-0.0477852	-0.0113361	0.0311909	0.00465927	0.0123106	0.0424775	0.016413	-0.0485105	0.0517553	0.024139	0.0277173
Q9HD20	0.0368911	-0.118203	-0.0697553	-0.111713	-0.125939	-0.158011	-0.167976	0.00431159	0.0232988	0.0663724	0.0715471	0.12415	0.215325	0.143766	0.0659364
Q8IX01	0.109767	-0.14096	-0.0917226	0.0951678	0.0739735	-0.040979	-0.0406548	-0.0698872	0.129612	-0.0108648	-0.0152011	0.0402607	0.152702	-0.0448885	-0.146325
P50440	-0.0842548	-0.0977067	-0.0256706	0.158052	-0.0218946	-0.00418165	0.117144	0.0176903	-0.0422265	-0.139396	0.0414228	0.135996	0.0921766	-0.0705026	-0.0766485
P17275	-0.0720227	-0.0275776	-0.00986024	0.013448	-0.00569827	0.0507815	-0.0448779	-0.0902864	0.0337166	0.0551512	0.099407	-0.0181215	0.0424024	-0.0562241	0.029762
P59998	0.128168	0.378391	-0.0376613	-0.146647	-0.358926	-0.0389512	-0.0092413	0.0352427	-0.0323898	0.0124427	0.0124212	0.216776	0.266539	0.0480646	-0.474229
Q5JSL3	-0.0805732	-0.0586531	0.0112596	-0.0270012	-0.0651681	-0.012623	0.073591	-0.020593	0.0118859	0.0182237	0.0710096	0.184862	-0.00927727	-0.0831319	-0.013811
Q9Y6M5	-0.232198	-0.0809486	0.0315268	0.0436994	0.00743767	0.0522196	-0.0926472	0.0601183	0.0508573	0.0534304	0.100628	-0.0230157	-0.0945608	0.0265385	0.096915
P48634	-0.0165449	0.119619	0.0140533	-0.132437	0.0465009	0.0620633	-0.150031	-0.0320516	0.0358223	-0.0839317	0.0913394	-0.00956157	0.0817952	-0.00820664	-0.0184293
Q9NXH8	0.111557	-0.061622	-0.0647504	0.0143414	-0.0541773	-0.0385826	-0.041637	-0.00216041	0.0383842	0.00886289	0.0854578	0.0250642	-0.0288398	-0.032741	0.0408429
Q92544	-0.147319	-0.272257	-0.111086	-0.101713	-0.166476	0.0168043	0.0725908	0.0345263	0.0775012	-0.0335886	0.274495	0.304243	0.106859	-0.0699546	0.015375
O94992	0.119116	0.0395483	-0.0225395	0.06611	0.0756868	-0.0424292	-0.0245681	0.0748999	-0.133584	0.0382097	-0.0388895	-0.0713077	-0.0532235	0.041748	-0.0687776
Q15404	-0.000133628	0.0880645	-0.0817051	-0.00149489	0.109293	0.112857	-0.00966065	-0.0263759	-0.148925	-0.0155543	-0.0701133	-0.0048294	-0.0600728	0.0775898	0.0310605
Q8IXT5	0.179953	0.0217066	-0.222455	-0.0472319	-0.0879205	0.108922	0.121447	-0.0888382	-0.021988	-0.260359	-0.102511	0.247462	0.153201	-0.162747	0.16136
P51572	-0.370898	-0.410121	0.0136238	0.615461	-0.220313	0.214035	0.155231	0.153131	0.188052	0.0193554	-0.23845	-0.275941	0.0796209	0.0326543	0.0445586
P30519	-0.053678	-0.245898	0.0129357	0.22477	-0.250991	-0.000836355	-0.00482179	-0.0021804	-0.0876826	0.0224606	0.27722	0.20883	0.131023	-0.143492	-0.0876587
P41252	0.239375	0.43315	0.0981565	-0.582294	0.165345	-0.101887	-0.0887963	-0.0240068	-0.174223	0.0806779	0.0172205	-0.19055	-0.0584944	0.265183	-0.0788564
P61158	0.200185	0.343761	0.121303	-0.302324	-0.510194	-0.126923	-0.0724298	-0.0843222	0.0394066	0.0641315	-0.0238854	0.171364	0.449399	0.225834	-0.495306
O15427	-0.0381008	-0.178882	0.187275	0.114001	0.0444602	0.111226	0.0908094	-0.0568334	-0.0906084	-0.0911927	0.0669479	0.0397103	-0.0797029	-0.0489426	-0.070167
P55884	0.0534411	0.272258	0.131547	-0.363933	0.234789	-0.0294196	-0.246522	-0.0229016	-0.12226	0.177355	0.232701	-0.130728	0.221521	-0.343514	-0.0643327
O95777	-0.0646145	0.0659765	0.0522782	0.42623	-0.105491	-0.0169828	-0.307018	0.0341253	0.0740055	0.0620465	-0.0984893	-0.0616879	0.00207801	-0.0280008	-0.0344558
Q9P206	0.0263795	0.0638018	-0.0361995	0.0117052	0.0825572	-0.0565409	0.00916713	-0.0146701	-0.0424313	-0.0617666	-0.0653375	-0.0396446	0.0407018	0.0410188	0.0412589
Q9UHD1	-0.217483	0.227473	-0.0251057	-0.160226	-0.099445	0.125584	-0.0866672	0.0383681	0.112491	0.0526558	0.0222548	0.032567	-0.167467	0.1759	-0.0308992
Q12906	-0.00330578	-0.565594	-0.160844	0.343554	-0.460946	-0.160415	-0.0195582	-0.139535	-0.0862203	-0.0562642	0.0274773	0.5372	0.482682	0.0419601	0.219809
P63244	0.235713	0.970185	0.333425	-0.87924	0.357062	0.0632813	-0.237673	0.00770719	-0.338556	0.0794402	0.135608	-0.725396	0.0303251	0.0941725	-0.126056
Q6IA69	-0.000531081	-0.00751566	-0.00998114	-0.00928647	-0.00842746	-0.00427222	-0.00403001	-0.000386392	-0.00178512	-0.00905084	0.00712545	-0.00674887	-0.00641273	0.0102123	0.0510902
Q86YP4	0.0536809	0.00960341	-0.0276965	-0.227164	0.0165596	-0.0688248	0.0180099	0.0172781	-0.0751169	0.0127481	0.0557855	0.00671271	0.0181796	0.036537	0.153708
P09874	0.327416	0.251359	0.535103	-0.704727	-0.135621	0.0223758	0.125781	-0.163139	-0.356456	-0.0746179	0.41837	-0.529146	-0.161155	0.377439	0.0670186
Q8NC56	-0.0893971	-0.105205	-0.0921315	0.127405	0.00689405	0.0634932	0.0664203	0.122805	-0.153399	0.088743	-0.139576	0.04923	0.0295357	-0.0544791	0.0796613
Q15050	-0.165803	-0.218386	0.0250204	0.031153	0.000674943	-0.126383	0.000307379	-0.0164261	0.160602	-0.0532305	0.394482	0.058633	0.158199	-0.187963	-0.0608815
Q96DV4	-0.0288119	-0.0747065	0.0753093	0.0698777	-0.285399	0.0169033	0.055947	0.137994	0.0687697	0.11331	-0.0220305	-0.00626521	-0.0505017	-0.111631	0.0412347
Q02218	0.146027	-0.270262	0.13503	0.143639	-0.215018	-0.114964	-0.0478494	0.0942479	-0.154937	0.0583813	0.00710969	0.232338	0.281597	-0.121212	-0.174127
Q9UJZ1	-0.289494	-0.416891	0.0364595	0.8838	-0.263301	0.0648065	-0.0342293	0.0457533	0.00229184	0.027407	0.0763122	0.0490345	0.109968	-0.257433	-0.0344855
Q9NXF1	0.146384	-0.0344806	0.068895	-0.00527656	0.00723468	-0.0976546	-0.19068	-0.0833808	-0.208308	-0.0895275	0.0142629	0.221098	0.129057	0.0717077	0.0506692
Q9H1E5	0.0469354	-0.0672249	-0.0805955	0.141731	0.0501506	-0.026612	-0.016052	-0.0330178	-0.0134022	0.00949492	0.00111241	0.0112548	0.0201251	-0.0098712	-0.0340288
Q96DB5	0.08315	0.00899207	-0.266823	0.233771	0.0343838	-0.0216158	-0.0242716	-0.0458826	0.0489504	-0.0398935	-0.0990641	0.0975577	0.108027	-0.00773925	-0.109543
P11233	-0.0216835	-0.180323	-0.0386349	0.242162	-0.0689933	0.0527576	0.047088	0.067951	0.0158459	0.102135	-0.128031	0.105833	0.0675208	-0.230688	-0.0329397
P15311	0.0237374	0.250834	0.283883	-0.299814	0.170158	-0.059785	0.0238976	0.0202741	0.188547	0.0669979	0.109661	-0.745613	-0.164871	0.229439	-0.0973449
Q9Y383	-0.211741	0.00977744	0.022473	-0.190103	0.150481	0.0953943	0.136859	0.148852	0.134353	0.149377	0.007025	-0.450502	-0.124597	0.141415	-0.0190634
Q99661	0.081355	-0.0103831	0.122267	-0.0724245	0.0664427	-0.115064	0.00385789	-0.0346977	0.00842182	-0.00907084	0.00829322	0.0284983	-0.026623	0.0611968	-0.11207
Q9NQC3	0.0119483	0.0769836	-0.288501	-0.554012	0.0801518	-0.0473026	0.201515	0.308795	0.300529	0.0869502	-0.105482	-0.207381	-0.171497	0.0754461	0.231857
Q9H2U1	0.12937	0.0065119	0.100473	0.0213117	-0.0975034	-0.0398282	0.0596422	0.0154528	0.00215316	-0.0581675	0.0644031	-0.135146	-0.217022	0.13229	0.0160601
Q15437	0.0148357	0.166337	0.0339987	-0.148643	0.0985384	0.00421216	0.0204291	-0.00813186	0.00358943	0.0370908	-0.109512	-0.124239	-0.116549	0.136508	-0.0084652
P34932	0.0179946	0.583828	0.28023	-0.490034	0.217973	-0.0212658	-0.0953108	0.0434921	-0.165778	0.00812836	0.0587337	-0.336012	-0.13264	0.198742	-0.168081
P13798	0.0631272	0.179628	0.00345423	-0.140027	0.109491	-0.0735804	-0.013933	-0.0186228	0.02795	-0.04368	0.0248337	0.0519563	0.0112149	-0.109539	-0.0722732
Q13126	-0.0942077	0.219699	-0.0408275	-0.117973	0.0461403	0.0956017	-0.0568066	-0.00810555	-0.0296421	0.0331464	0.159361	-0.0677787	-0.0822991	0.032579	-0.0888872
P22830	0.0530673	-0.0814855	-0.0955907	-0.0977357	-0.101492	0.0265773	0.0177678	-0.00976561	0.170062	0.0486721	0.128786	0.0557547	-0.0370314	-0.0936061	0.0160204
P13797	0.153367	0.4699	-0.0527077	-0.233437	0.411506	-0.090301	0.0402019	0.0715792	-0.0315783	-0.0860411	-0.294807	-0.180566	-0.134901	0.0417905	-0.0840036
Q13098	0.115201	0.079204	0.230196	-0.251628	0.017803	0.0787482	-0.0291758	0.00604488	0.0156672	-0.0241263	-0.0722363	-0.085441	-0.260246	0.167893	0.0120981
P10768	-0.0674136	0.137822	0.0458811	-0.144871	0.10837	0.0371397	-0.00943726	-0.0137624	0.0306279	-0.0344332	-0.00635269	-0.00350924	-0.0643091	0.059798	-0.0755497
Q9BTA9	0.0349261	0.026913	-0.159221	0.0361932	-0.0920746	0.0478811	0.045112	0.0520554	0.044701	0.0136818	0.0792982	-0.0119854	0.0085366	-0.133829	0.00781201
Q96EE3	-0.00804858	-0.0566291	-0.186409	0.022572	-0.00799996	-0.098428	-0.0384705	0.062045	-0.133953	0.118416	0.0204619	0.177842	0.155817	-0.0241069	-0.00310861
Q9UNP9	-0.0316395	-0.170598	0.0639658	0.19597	0.0545925	-0.0246568	0.0054011	0.117772	-0.128008	-0.0479595	-0.0290857	0.0308096	-0.0282608	0.100567	-0.10887
Q92917	0.0204922	-0.0394219	0.0625063	-0.184499	-0.0533278	0.0841812	0.16565	-0.0163596	0.00337229	0.04473	0.0635801	-0.141508	0.109429	-0.0858954	-0.0329298
Q8TBC4	-0.0363854	0.11238	-0.14187	-0.0932749	0.0915014	0.00524071	-0.0372606	0.0799904	0.00130059	0.0241676	-0.0952247	0.00844142	-0.00347018	0.066848	0.0176157
Q8TAT6	-0.125598	0.0438192	0.000304679	-0.0592171	-0.0652959	0.24759	-0.0301754	-0.155606	-0.0150622	0.0974266	0.0727614	-0.0148463	-0.00703768	0.0581561	-0.0472194
P27216	-0.0259809	0.0350125	0.0444537	-0.0404075	-0.141623	0.0457312	0.0361036	0.040622	0.0241573	-0.0345295	-0.0244029	-0.00809878	-0.0196575	0.0500178	0.0186021
P42167	0.472695	0.272235	-0.540072	-0.257549	0.320007	0.00856743	0.0232885	0.0171499	-0.0665869	0.00628467	-0.665751	0.0970375	-0.295915	0.289284	0.319326
Q15393	0.0959174	-0.524263	0.032587	0.219997	-0.221602	-0.0326531	-0.12086	0.0290462	0.00349159	0.105513	0.305483	0.50784	0.283425	-0.471851	-0.21207
Q7L1Q6	0.0766306	0.166946	0.127202	-0.349316	0.212067	0.0909761	0.0147875	0.0461495	0.0105111	0.111422	-0.0386057	-0.410789	-0.029782	0.0878039	-0.116003
P09972	-0.0544593	-0.0701288	0.193356	-0.331339	0.334222	-0.146126	-0.00364472	-0.0236129	0.00725815	0.0176233	-0.183256	0.068252	0.102911	0.165956	-0.0770122
O95757	0.0417268	0.0372103	0.0527245	-0.00795786	0.0625533	-0.0769152	-0.0228066	-0.00374945	-0.00704645	-0.00927601	0.045785	0.0143551	-0.0330394	0.0437387	-0.137303
Q9P2K5	-0.0631149	-0.023262	-0.0128227	-0.00894202	-0.133029	0.00424925	-0.0372621	-0.0946044	0.0606629	0.0378303	0.0459272	0.13961	-0.018667	0.0117826	0.0916419
P60842	0.314953	0.724997	0.330054	-0.771464	0.387049	-0.205006	-0.114563	0.0296485	-0.0324208	0.037748	0.0102398	-0.559224	-0.219338	0.153254	-0.0859291
P40429	0.151494	0.068885	0.0528161	-0.170962	0.0899033	-0.120937	-0.0658652	-0.142358	0.0649243	0.0915014	0.0555007	-0.22749	-0.00273767	0.135622	0.0197019
Q9H3K2	-0.122635	-0.124829	0.0815679	0.311881	-0.0368868	0.0270531	0.0104228	0.00275199	0.0687223	-0.103574	0.0318069	0.0139903	-0.175977	-0.0500937	0.0657982
Q13769	0.0257407	-0.231095	0.0766492	0.0737331	-0.0686087	0.00905127	-0.0475621	0.0891846	0.0171616	0.0673726	0.0844879	0.0630632	0.0832137	-0.0503112	-0.192081
Q8IZ07	0.010162	-0.105174	-0.0458812	-0.0510646	-0.0190693	-0.044507	0.0188873	0.0429582	0.0356584	0.0421267	-0.0191651	0.0922884	-0.0216023	0.0319102	0.0324719
Q9H6F5	0.0114277	0.0116097	0.0935135	-0.21704	0.0083077	0.0617566	-0.0769446	-0.105557	0.15355	0.0594303	0.0543545	-0.0597736	-0.0167442	-0.0908966	0.113007
Q9NRN7	-0.0384844	0.0681921	-0.055863	-0.0298482	0.0993739	0.0729874	-0.0249581	-0.0186451	0.00832624	0.0161175	-0.0693943	-0.0377359	0.105374	-0.0731593	-0.022283
O60488	-0.0723345	0.00356492	-0.127409	0.23396	-0.147854	0.0862437	-0.055946	-0.223445	0.136652	0.16308	0.0251603	0.210739	0.0152641	0.155886	-0.403562
Q00059	-0.185366	-0.268103	-0.000554151	0.336968	-0.204908	0.0225201	0.122117	0.101319	0.109692	0.182921	-0.0020923	0.0692793	-0.0585973	-0.193642	-0.031553
Q9BZF9	-0.0705897	-0.0775678	0.0284122	0.0666017	0.0377349	-0.0789729	0.016571	-0.065432	-0.00697899	0.00732413	0.0942008	0.175816	0.0172972	-0.026386	-0.11803
Q9BZG1	-0.145547	0.0066241	-0.0345499	0.193345	-0.0752119	-0.0444162	-0.0385333	0.0343805	-0.0503631	0.0479505	0.0457365	0.0764638	0.102274	-0.109154	-0.00899942
O75962	-0.0392439	0.0225629	-0.0344034	-0.0175187	0.0253946	-0.0241246	-0.0223412	-0.00938896	-0.0560237	-0.0220984	0.0275419	0.0210985	0.090745	0.0749495	-0.0371495
P30084	-0.220442	-0.423493	-0.0140065	1.01173	-0.140683	-0.0793422	-0.0862445	-0.0176647	-0.0894313	-0.0573429	0.216796	0.0590503	0.0540609	-0.19006	-0.022928
P35241	-0.0121368	0.277481	0.00470915	-0.0315153	0.255224	-0.131674	0.0605091	0.141194	0.00427156	-0.128128	-0.0569806	-0.399872	-0.148802	0.294551	-0.12883
Q14160	0.0597497	-0.225599	-0.0794087	0.0530609	-0.0582971	-0.0826079	-0.096948	0.022325	0.0557064	0.0335712	0.0173154	0.184673	-0.020544	0.0230577	0.113945
P48643	-0.194524	-0.124547	0.140024	-0.508273	-0.214119	0.249099	-0.153741	-0.156674	-0.145672	0.169942	0.137712	1.29442	-0.219958	-0.0362414	-0.237447
P50991	0.0861097	0.617145	0.418453	-0.785545	-0.0893175	0.138123	0.0836842	0.0386343	-0.0842041	-0.106887	0.276882	-0.154927	0.0621547	0.123337	-0.623643
Q13148	-0.0413502	-0.294831	0.21878	0.32619	-0.0170454	0.00498058	-0.0139376	-0.0292198	-0.0730625	-0.107959	-0.00765522	-0.120904	-0.084945	0.154837	0.0861219
P41247	0.00553154	0.0777256	0.0146817	0.0133985	-0.0250154	-0.0460901	0.033723	-0.0458323	0.012497	0.0211669	0.0443704	-0.0508571	0.0479709	-0.0528154	-0.0504552
Q9BXJ9	-0.0188232	0.271144	0.209863	-0.500407	0.192853	0.0666082	-0.0888148	-0.00989326	-0.032435	-0.0434306	0.138684	-0.293308	-0.123323	0.18553	0.0457521
Q9H2U2	0.0322082	-0.0729897	-0.128266	0.375732	-0.110911	-0.0113328	-0.0153679	0.0941304	0.0405866	0.0125609	-0.394603	0.110448	0.109167	-0.0708691	0.0295065
Q5VZE5	0.0319293	0.0471982	0.00174753	-0.0492179	0.0590902	-0.00486952	-0.0110898	0.00832365	-0.00597886	-0.0299871	0.0347058	-0.057389	-0.0216552	0.00176007	-0.00456729
Q14166	0.0585451	0.104196	0.0781824	-0.110711	0.0636642	-0.0853941	-0.0782298	0.0271226	-9.03082e-05	0.107131	-0.0829203	-0.100886	-0.11839	0.0267657	0.111015
Q15365	0.0309933	0.192674	-0.0964045	-0.356484	0.34521	0.0265516	0.0321385	-0.0146636	-0.0421064	-0.222287	-0.0975731	-0.112016	-0.198962	0.480698	0.0322311
Q15366	0.0366713	0.0539613	0.0631116	-0.230221	0.122477	0.046785	-4.67266e-05	-0.0119837	-0.0426162	-0.0174493	0.297732	-0.13641	-0.303059	0.201615	-0.0805679
Q6NVY1	-0.0618337	-0.212809	-0.0555648	0.361514	-0.113427	0.0229654	-0.00390022	0.0362529	0.0172325	-0.0154256	-0.0333303	0.0793865	0.0437224	-0.0153909	-0.049392
P54577	0.00115859	0.22107	0.0903722	-0.43172	0.160256	-0.181995	0.0939614	0.0734984	0.139611	0.0926245	0.00430131	-0.253659	-0.125737	0.182595	-0.0663363
Q8N1F7	-0.0473553	-0.110546	0.192002	-0.151328	-0.0158494	-0.141157	-0.217654	-0.138232	-0.18456	0.218306	0.457499	0.238248	-0.176932	-0.0418774	0.119436
Q9Y3D9	-0.162268	-0.171132	0.067813	0.242997	-0.202532	-0.00217343	-0.00288854	0.0492115	-0.0387171	0.0158646	0.0920697	0.128423	0.175094	-0.114872	-0.0768896
O96000	-0.0594245	-0.295247	-0.0663861	0.205208	-0.045973	0.0213715	0.0780111	0.0938187	0.0801579	0.0638926	0.0305336	-0.0205829	0.101794	-0.19419	0.0070155
Q9H3G5	0.0268914	-0.0414422	-0.148928	0.356802	-0.012605	-0.0247028	0.0218801	-0.0595841	-0.120491	-0.0522516	-0.00611389	0.17392	0.14021	-0.0945555	-0.159031
O14908	-0.0471402	0.0902429	0.0565625	-0.177947	0.129391	0.166519	-0.199604	0.0248262	-0.0660569	-0.0157098	0.0288977	-0.00533098	0.0178553	0.0074065	-0.0099124
P62316	-0.489306	-0.37714	-0.1874	0.797479	-0.203095	0.169737	0.246898	0.2028	0.0849628	0.183408	-0.196391	-0.156689	-0.0359654	-0.122168	0.0828693
P78560	0.0159064	0.00911189	0.0339287	-0.00738356	0.00687616	-0.00453172	0.000997633	0.00518579	-0.0037711	-0.00670163	-0.0199364	-0.00060503	-0.0147336	-0.0163116	0.00196814
Q96S66	0.00688699	-0.0308512	0.0677506	-0.0388386	-0.0711831	-0.091827	-0.0111414	0.0536935	-0.06774	-0.0230573	0.223517	-0.0744302	-0.000581364	0.0684479	-0.010646
Q9Y2H6	-0.0728747	-0.15082	0.0161366	-0.00890807	0.00862356	0.00895743	0.051555	-0.0309024	0.0957381	0.0246142	0.0315913	0.153844	-0.00929806	-0.0571571	-0.0611005
O75937	0.0792421	-0.0373221	0.11805	-0.325073	0.0654802	0.142695	-0.109452	0.108108	-0.0654253	-0.077392	-0.084364	-0.0287889	-0.0183597	0.144522	0.0880796
Q9NTK5	0.178804	0.193398	0.0144006	-0.323303	0.126814	0.0808287	0.0525839	0.00802094	-0.164495	-0.0539866	-0.0936162	-0.17553	-0.026959	0.167134	0.0159052
P55072	0.338642	0.944768	0.541636	-0.790557	-0.155665	0.00753773	-0.022884	-0.024685	0.00828771	-0.127185	-0.142833	-0.615094	-0.0565336	0.73264	-0.638074
O43818	-0.191088	-0.0954158	0.0260824	0.0226693	-0.0577859	0.0884616	0.133864	-0.0485576	0.0358293	-0.123495	0.195651	-0.00779115	0.11124	-0.119078	0.0294141
P42892	0.0761909	-0.0183917	0.0116864	0.152045	-0.236298	-0.0325749	0.00304222	0.0960677	-0.00872144	-0.0551574	-0.0204877	-0.0111996	0.00582389	0.101865	-0.0638905
O43929	0.0728775	-0.0514448	0.0361006	0.1484	-0.0158688	-0.0292499	0.0360482	0.0116278	-0.00878649	-0.0313325	-0.0780348	0.037059	-0.0381065	-0.0918517	0.0025625
P21589	-0.216732	-0.0802186	-0.00167379	0.310622	-0.400625	0.168955	-0.0418253	-0.0374721	0.100425	0.0999238	0.0615119	0.140125	0.0195813	0.0753019	-0.197899
P25788	-0.110673	0.178787	0.202393	-0.165046	0.148827	0.0383828	0.0967925	0.083955	-0.0363066	0.0687168	-0.317328	-0.178239	-0.107187	0.181553	-0.0846289
Q5VZK9	-0.0408764	0.0273249	0.127392	0.149926	-0.0135195	-0.0280636	-0.0310752	-0.0310012	-0.0241998	-0.0346351	-0.0529296	0.066948	-0.0338437	-0.00921127	-0.0722352
P49189	0.0419534	0.00145615	-0.115526	-0.0723435	0.155289	-0.0754799	0.158118	0.00759823	-0.00290215	0.0166953	-0.176653	0.0948595	-0.0787424	0.174687	-0.12901
O95470	0.133799	-0.0317979	-0.0950154	0.0740256	0.0324843	0.0287587	-0.0591746	-0.0561226	0.088292	0.0248325	-0.108529	0.10343	0.0898911	-0.0334614	-0.191412
P55786	0.260702	0.324811	0.00932163	-0.260971	0.370399	-0.0212929	-0.261877	0.0207059	-0.0766638	-0.0370853	-0.15283	-0.128259	-0.0981296	0.0750843	-0.0239148
P08581	0.0839874	0.0119371	0.0368291	-0.065871	0.00624159	-0.0506422	-0.0461389	-0.00187434	-0.0225833	-0.0517685	0.0409083	0.059148	0.0325553	-0.0894639	0.0567354
Q6ZRP7	0.0445501	-0.0483943	0.0364446	0.0407725	-0.05464	-0.151675	-0.0432744	-0.13384	-0.0353767	0.039647	0.0746934	0.215374	0.0833169	-0.00854594	-0.059053
P32004	-0.0382512	-0.0711791	-0.0434651	0.220473	0.0142335	-0.202234	-0.0384999	0.0295904	-0.108171	-0.0861887	-0.133631	0.176571	0.140504	-0.0595962	0.199844
Q13363	-0.1972	0.0493307	0.0904758	-0.13777	0.0290448	0.0891553	0.0317596	0.0841868	0.146044	0.0700692	0.0197246	-0.119193	-0.154766	-0.0576727	0.056812
Q96FW1	0.0857483	0.238401	-0.00126103	-0.276278	0.251462	-0.115012	0.0121919	-0.0602089	-0.00112882	0.0168786	-0.0859117	-0.0932557	-0.0329447	0.0559726	0.00534587
P25325	0.117092	0.0163299	-0.125731	-0.0630495	0.015439	0.0416034	-0.122207	0.00906244	-0.151549	-0.0142507	-0.0164979	0.13532	0.140508	-0.0132142	0.0311428
P06493	-0.197784	0.318515	-0.0719103	-0.266625	0.19049	0.0234974	0.097606	0.0540498	0.0393496	0.146792	-0.19946	-0.0990404	0.0242319	0.0472383	-0.10695
Q13620	0.121977	-0.041667	0.0142924	-0.106735	0.0442242	-0.0500068	-0.241251	0.0475935	0.0259019	0.0108504	0.0597238	0.155386	-0.150704	0.143804	-0.0333886
P84103	-0.49647	-0.262229	-0.0626532	0.506508	-0.1647	0.0722115	0.128879	0.205463	0.141955	0.11997	-0.20184	-0.0966675	0.124377	-0.152569	0.137766
Q15738	0.0711611	-0.388693	0.0998927	0.54999	-0.220152	-0.117705	-0.131238	-0.107387	-0.030597	-0.135068	0.228356	0.266351	0.12846	-0.0773699	-0.136001
Q9UIG0	0.0241439	-0.121261	-0.196175	0.0640134	-0.200171	0.0996114	-0.0747478	0.0890781	0.127994	0.0843504	0.217667	0.00757796	-0.0159038	-0.136528	0.0303513
P17987	-0.0633222	0.24727	0.436804	-0.679135	-0.0260184	-0.0995444	0.0949215	0.0606378	0.100919	0.155032	0.535333	-0.0445579	-0.0841096	-0.158673	-0.475557
O95864	0.0291493	-0.0133195	-0.0197662	0.0851211	0.0215206	-0.0387169	-0.095881	-0.0282226	-0.0485798	-0.147532	0.0268662	0.0506966	0.211445	0.0117371	-0.0445188
Q00341	0.0702394	0.0633143	0.186892	-0.45187	0.172301	-0.0391485	-0.0641761	-0.0517097	-0.0359932	-0.105964	0.4846	-0.600636	-0.174581	0.299441	0.24729
Q9H3P7	-0.0418764	0.0570589	-0.11415	0.0849661	0.000749123	-0.0955127	0.178309	0.135461	-0.107498	-0.02489	-0.12637	-0.0671462	-0.0314697	0.0830749	0.0692938
P23634	-0.0729656	-0.112267	-0.186947	0.000790081	-0.024316	0.184671	-0.102306	0.12871	-0.0059031	0.0574656	-0.137075	0.0415657	0.102641	-0.0253461	0.151281
Q9UIJ7	-0.180735	-0.112811	-0.121898	0.43015	-0.165467	0.0977505	0.011331	0.10329	0.0972185	-0.0658465	-0.207617	0.146359	0.123184	-0.15845	0.00354166
P47897	0.16548	0.38193	-0.0127749	-0.18579	0.0943799	-0.0266133	0.0681282	-0.101789	0.0392697	-0.212153	-0.222908	-0.185339	-0.278964	0.41488	0.0622633
Q7Z2K6	0.129061	-0.226893	-0.32235	0.211286	-0.147295	-0.0573812	-0.018909	-0.039238	-0.0198195	-0.185128	-0.182197	0.215819	0.347126	0.25596	0.0399588
Q15029	0.137899	-0.354461	0.0302203	0.196591	-0.103133	-0.136714	-0.0597525	-0.126645	-0.188156	-0.131478	0.124727	0.543543	0.359063	-0.321911	0.0302088
Q9Y4P3	-0.00303531	-0.294929	0.0756853	0.0990405	-0.151505	0.0910564	0.0552839	0.04473	0.123016	0.00564379	0.0988158	0.0366586	-0.0978977	-0.201354	0.11879
Q9NYK5	-0.0871402	-0.116468	-0.0708772	0.11814	-0.185713	-0.0825117	-0.0653642	0.0889788	-0.0348855	0.131444	0.193122	0.0811601	0.170873	-0.222646	0.081888
Q14152	0.195443	0.307714	0.211256	-0.445149	0.218858	-0.120775	-0.3399	-0.153327	0.0191223	-0.102457	0.299706	-0.237874	0.0789613	0.00920031	0.0592227
P05388	0.360046	0.263916	0.0649921	-0.226541	0.00154847	-0.101126	-0.0631296	-0.235909	-0.16063	-0.170591	0.0766248	0.00258688	-0.0711823	0.222645	0.0367491
P09211	0.111512	0.449095	-0.162238	-0.296252	0.393672	0.0010906	0.0249142	-0.0863309	0.0206017	0.0524243	-0.27394	-0.109884	-0.0951142	0.0317871	-0.061338
Q12931	-0.273552	-0.585509	0.355431	0.207995	-0.427177	-0.077003	-0.0135826	0.0117623	0.0387668	-0.177668	0.937936	0.252477	0.26505	-0.354082	-0.160844
Q9H7Z7	-0.013632	-0.263175	-0.0629846	0.379115	-0.148908	0.0341801	0.0681699	-0.0576643	0.0252265	-0.0124759	0.107221	0.0436687	0.132682	-0.168623	-0.0628012
P78344	0.125046	0.34781	0.281052	-0.127589	0.177468	-0.260962	-0.430648	-0.0369349	-0.163599	-0.0143361	0.244634	-0.128012	-0.067847	0.138875	-0.0849562
Q9H3M7	0.0913365	-0.0443605	-0.0722345	0.0853186	0.0716787	-0.0927605	-0.0589678	-0.0619054	-0.0903164	-0.137452	-0.0243381	0.162973	0.0737421	0.0421708	0.0551155
P29372	0.0796623	0.0431497	0.0190117	-0.0139905	-0.163858	0.0414141	-0.0833541	-0.00591333	-0.00210088	-0.0100266	0.0581164	0.0086059	0.0537118	0.110877	-0.135306
P49207	-0.112522	0.0197332	0.104079	-0.470906	0.173317	0.135396	0.198738	0.212829	0.222911	0.000289577	-0.0484434	-0.444469	-0.4493	0.241088	0.21726
Q8WWC4	0.0377572	-0.11334	-0.0477511	0.047604	-0.043833	-0.0232874	-0.0172802	-0.0569877	-0.0177797	0.0345708	0.172666	0.122437	-0.0179036	-0.00264902	-0.0742231
Q9H6V9	0.0189496	0.0101002	0.00875913	0.0336977	0.0515422	0.0184616	0.00991275	-0.0253472	-0.013649	-0.00726404	0.0169081	0.0575636	0.0213736	-0.0558492	-0.145159
Q8IV08	0.139565	-0.32868	-0.305985	0.536558	0.00856229	-0.0261928	-0.0480006	-0.0585431	-0.096037	0.0136389	-0.163519	0.184145	0.17461	-0.0947171	0.0645959
P36776	0.166205	0.0238469	-0.194186	0.0566192	-0.361864	0.49514	-0.233634	-0.101937	-0.109757	-0.116751	-0.0879691	0.297103	0.161762	-0.3031	0.308523
Q96S44	-0.033007	0.048278	0.00509721	-0.178829	0.0491015	-0.00164432	0.0054063	0.0359603	0.0517473	0.0095872	0.00946095	-0.0152722	0.0397271	0.0715748	-0.0971883
P61026	-0.0417305	-0.185566	0.0387414	0.602427	-0.226731	-0.046831	-0.0969039	-0.0366376	0.0305926	-0.0741732	-0.266868	0.24594	0.076274	-0.0607967	0.042264
P39023	-0.153583	0.392677	0.141228	-0.498067	0.156388	0.0784742	0.118703	0.20763	0.206921	0.136036	0.087061	-0.620134	-0.367873	9.96382e-05	0.114438
Q9H5V8	-0.0759753	-0.0169061	-0.0257068	0.00280743	-0.180879	0.0961418	0.0429742	0.0621152	0.0272268	0.068851	-0.00513821	-0.0441075	0.0190794	-0.00699505	0.0365124
O95983	-0.00443519	-0.00459221	-0.145828	0.25369	0.0705615	-0.00738747	-0.149356	0.0500481	0.0912286	0.0224328	-0.0395711	-0.0718644	-0.108177	0.0467611	-0.00351012
P26440	-0.155598	-0.185391	-0.0213097	0.193911	0.0597779	-0.028068	0.276616	-0.00382094	0.0416378	-0.220147	0.0967153	-0.000624007	-0.0856538	-0.0239653	0.0559198
Q92598	0.0682956	0.215352	0.585413	-0.663873	0.0812545	-0.0155009	-0.059693	-0.0732212	-0.0691661	-0.0827374	0.512961	-0.191809	-0.0834169	0.175269	-0.399128
P51809	0.119643	-0.177302	-0.044324	0.0333595	-0.0955929	0.0908583	-0.0639726	0.0613919	0.014464	0.110978	0.0208838	-0.065437	0.00437223	-0.0574479	0.0481259
P46060	0.158922	0.0461515	-0.111195	-0.00499717	-0.0674105	-0.0521913	-0.0937628	-0.00963008	-0.0409219	-0.259019	0.274745	0.223349	0.167181	-0.0966112	-0.13461
Q658P3	-0.139943	-0.1161	0.0277385	-0.00980154	-0.146737	0.0657461	0.0627897	0.0577258	0.0312273	0.0531628	-0.0182291	0.0381153	0.0994635	0.00804968	-0.0132079
Q9Y619	0.00151689	-0.0729202	-0.0381532	0.0674863	-0.0915367	0.0264971	0.127815	-0.0285621	-0.0162643	0.0376692	0.0812756	0.00552625	-0.0184617	-0.0472602	-0.0346281
Q9UQB8	0.0226716	-0.142359	-0.0152098	0.283657	0.0783519	-0.16345	-0.0271118	-0.10203	-0.0361422	-0.108205	0.0362052	0.14953	0.0975716	-0.108723	0.0352445
P35270	0.132252	0.146018	0.0219636	-0.0388671	0.168493	-0.121661	0.0577984	-0.0131311	-0.124734	-0.0262417	-0.0527196	-0.0591836	0.0127649	-0.125047	0.0222955
O43813	0.127528	0.00799656	-0.190979	-0.0723472	0.160522	0.0707755	-0.000912159	-0.0990828	-0.0362339	0.0802743	0.017091	-0.0595329	0.0243078	0.00975985	-0.0391664
O95372	-0.0066829	0.0442243	-0.014546	-0.0346049	0.0970772	0.00866994	0.00490929	-0.0311142	-0.00351939	0.00566895	-0.0458067	-0.0565041	0.0143533	0.039662	-0.0217869
Q969N2	0.000467492	-0.0676045	-0.0588961	0.0118545	-0.119767	-0.0348461	-0.110406	0.0488394	0.0414065	0.154173	-0.114046	0.232066	-0.0604549	0.0203338	0.0568802
P38432	0.0357623	-0.029759	-0.0783503	0.0666726	-0.120326	0.044333	0.0155521	0.0096608	-0.0103043	-0.0476704	-0.0197976	0.105755	0.0753206	0.0343394	-0.0811874
Q96PC5	0.0456689	0.0451893	-0.105757	-0.217896	-0.0359049	-0.014657	0.0153687	-0.00150704	0.0493694	0.0458091	-0.021215	-0.0103714	0.212938	-0.0095383	0.00250375
Q9H814	0.00987577	0.0265396	-0.0190131	-0.0386841	0.044295	0.026111	-0.0425795	0.00224998	-0.0421623	-0.0487642	0.0013192	-0.0216228	-0.00412985	0.0887118	0.0178536
P15586	0.0950823	-0.160851	-0.137343	0.307349	-0.0166346	-0.0679658	-0.047733	-0.111902	-0.152718	0.0405223	-0.114335	0.0956588	0.227406	0.0339318	0.0095311
O00115	-0.0564443	-0.112027	-0.10921	-0.0523436	-0.293505	-0.00813005	0.0538055	0.0260883	0.0618143	0.0525135	0.131875	0.170944	0.173456	-0.0380691	-0.000767633
Q9H0U9	0.0508585	-0.0533406	-0.00574602	0.0227851	-0.0373136	-0.00446449	-0.0196433	-0.0418936	-0.104629	-0.0201703	0.0340896	0.135735	0.120289	-0.00545321	-0.0711034
P30048	0.0157218	-0.567233	-0.268816	-0.00729153	-0.267892	0.0724983	0.103584	0.0228829	-0.0958153	-0.116088	0.226734	0.244659	0.277773	0.263067	0.0962154
P13010	0.920292	0.808988	0.250822	-0.666613	-0.245981	-0.15781	-0.207953	-0.254633	-0.240882	-0.167993	-0.0450426	-0.138414	-0.215401	0.733956	-0.373336
Q96AY4	0.0180792	-0.0129576	0.0122997	0.0300513	-0.0104338	-0.00426765	0.000691417	0.000889712	-0.00787117	-0.00409644	-0.0103502	0.00267509	-0.00799839	-0.00391762	-0.00279357
P61619	-0.0927839	-0.281547	0.141816	0.404194	-0.0313278	-0.0224357	0.107162	0.0282486	0.0443848	-0.041605	-0.0171463	-0.0251471	-0.101093	-0.105568	-0.00715174
O60506	0.0170738	0.220863	0.0705309	0.0894881	-0.275996	-0.0961113	-0.0719907	-0.20364	-0.122468	-0.122673	0.417825	0.148765	0.0321395	-0.0389046	-0.0648998
Q5JRX3	-0.152318	-0.0966166	-0.0315126	0.134486	-0.165042	0.129669	0.0520797	0.0292093	-0.0647452	-0.23512	0.234418	0.237618	-0.0572365	-0.0335088	0.0186188
P11279	-0.127601	-0.121633	-0.192599	0.479102	-0.172628	-0.00631942	0.0464128	0.048241	0.13198	-0.0153688	-0.384728	0.0448084	0.141692	0.0947953	0.0338454
Q9UN86	0.0746613	0.14825	0.057028	-0.159418	0.0741777	-0.0435948	0.0417614	0.0686894	-0.0524325	0.0522252	-0.214191	-0.271713	0.0336751	0.173216	0.0176664
Q14938	0.0349474	-0.02538	0.0307446	0.0359539	-0.0775456	-0.018042	-0.00146724	0.00535699	0.00792884	0.0300779	-0.0202973	0.019561	0.00437694	-0.0359275	0.0097121
Q16629	-0.586856	-0.181341	-0.106164	0.293007	-0.125749	0.0429612	0.0566277	0.100017	-0.00213826	0.125212	0.152634	-0.118092	0.155621	-0.0908931	0.285152
Q15269	0.0428675	-0.0176331	-0.105888	0.0896746	-0.244195	0.0951661	-0.0355021	-0.0197005	-0.122839	-0.193624	0.417449	0.0268353	0.109399	-0.0281184	-0.0138918
Q12923	-0.0892661	0.178232	0.055902	0.0758747	-0.0630149	-0.0196254	-0.00197725	0.026131	-0.0346096	0.0469212	-0.0695661	-0.0370147	0.00718529	-0.0361122	-0.0390604
P61599	0.0433656	0.10924	0.0160559	-0.0467527	0.000311255	-0.00405049	0.0245975	-0.0207273	0.0143206	-0.000726233	-0.0989736	0.00941472	-0.0369135	0.00133097	-0.0104928
Q96KB5	0.0665653	0.0102477	-0.0249902	-0.088132	0.0216972	0.00752306	0.0321931	0.075332	0.0108502	0.0318231	-0.0246766	-0.000395398	-0.0635953	-0.014611	-0.0398312
O60925	0.0271449	0.149255	0.0335379	-0.128658	0.108728	0.00806674	0.0220987	0.00144052	-0.0486415	-0.0414469	-0.0394993	-0.106976	-0.0300261	0.06803	-0.0230534
Q9UNZ2	-0.0461626	0.472085	-0.027812	-0.122018	-0.0628934	-0.0739134	-0.0763063	-0.102848	0.195803	0.171167	0.0484067	-0.268666	-0.222752	0.0820723	0.033837
P16615	-0.00909659	-0.616332	0.10331	0.321647	-0.219682	-0.0267075	-0.0814539	0.108823	0.00655762	-0.107536	0.442614	0.143971	-0.0418226	-0.0814392	0.0571469
P09543	-0.116477	-0.179098	-0.0690597	0.369146	0.0468759	-0.0230302	-0.0737094	0.0202119	-0.114831	-0.0698065	0.00618913	0.0554382	-0.00400369	0.0137997	0.138354
P12955	-0.0118048	0.391203	-0.248004	-0.221374	0.268115	0.0751302	0.0669431	-0.080571	-0.109783	0.079423	-0.381653	-0.0687684	0.140417	0.144331	-0.0436042
Q9UEY8	0.0219691	-0.0953502	-0.0725185	0.153368	0.162028	-0.138306	0.0268271	0.0253689	-0.131421	-0.0445488	-0.0415896	0.0163228	0.0216455	0.134658	-0.0384537
O00442	0.0582129	0.071044	0.0535017	0.0972691	0.0761081	-0.0326055	-0.00990809	-0.018342	-0.0785577	-0.0544313	-0.0500688	-0.016514	0.010471	-0.0287781	-0.0774014
Q07021	0.0376428	-0.535345	0.0519058	0.398803	-0.439468	-0.0349184	-0.130587	-0.0324758	-0.10575	0.023315	0.757371	0.307376	0.357046	-0.431531	-0.223384
P48147	-0.0539353	0.15024	0.085478	-0.102925	0.0290122	0.0695295	-0.0308489	-0.0596187	0.020265	0.0186271	-0.17403	0.000641109	-0.0398104	-0.000387163	0.0877633
Q9NRW7	0.0333306	-0.0924908	0.0611655	0.165104	-0.0984982	-0.0777572	0.0117511	-0.0246614	-0.097826	-0.0486384	-0.156439	0.104745	0.0815974	0.108233	0.0303845
Q9H4B7	0.179399	0.222866	0.118599	-0.292769	0.205031	-0.024864	-0.0234242	-0.00653301	-0.196127	-0.0571258	-0.0345514	-0.213395	-0.000218086	0.156843	-0.0337315
Q9NS86	0.0363214	-0.149568	-0.00155272	-0.0519873	0.145358	-0.0252144	-0.0560398	0.0177766	0.0759394	0.0882606	-0.0461903	0.0708729	-0.0160866	0.00170815	-0.0895983
Q9HAU5	0.0572601	-0.0161604	-0.0402568	-0.0337341	-0.0172786	0.0643075	0.0295728	0.0527421	0.0266997	-0.0344795	-0.135243	-0.17705	0.0450237	0.0926306	0.0859656
Q5SWX8	-0.066531	-0.115392	-0.061091	0.0580605	0.0304502	0.00347478	-0.0307958	0.0674546	0.0138151	-0.0742494	0.0568171	-0.00168332	0.0572732	0.00426026	0.0581365
Q96LJ7	-0.0261583	-0.186272	-0.0985744	0.0600505	-0.092632	-0.0362926	-0.0696838	-0.0580915	0.0432615	0.0540924	0.163028	0.0480391	-0.104205	0.137895	0.165542
Q9UL46	0.13291	-0.0230498	0.104033	-0.365716	0.237313	0.237952	0.105176	0.153667	-0.0107845	-0.172505	-0.207871	-0.326427	-0.0153426	0.356491	-0.205846
O75718	-0.190728	0.00440626	-0.198982	0.0518273	-0.0149088	0.0559874	0.0550261	-0.1838	-0.0630336	0.040349	-0.00654534	0.224491	0.129903	-0.00519227	0.101201
Q8WUY1	-0.014904	-0.0598224	-0.0698029	0.139471	-0.0749396	-0.00600935	0.0603934	0.00444534	-0.137143	-0.0408732	0.0288038	0.102493	0.11757	-0.0506759	0.000993097
P04181	-0.183532	-0.213145	0.162493	0.257519	-0.427308	-0.141118	-0.145204	-0.0668938	-0.074	0.00341664	0.462606	0.328312	0.213612	-0.0702856	-0.106472
Q16270	0.0204159	-0.0124636	-0.0674724	0.0420133	0.0598549	0.014172	0.113358	0.0312992	-0.0161637	-0.0328835	-0.129266	0.00960717	-0.0419187	-0.0414173	0.0508653
Q5T440	-0.0611311	-0.0816491	-0.0226465	0.159728	-0.217662	0.0208133	-0.0189198	-0.119514	0.0483119	0.0868644	0.131224	0.0122984	0.0910805	-0.0529303	0.0241333
Q8WW12	-0.1063	0.0072631	-0.0234416	-0.123991	0.201809	0.116226	0.0944396	0.120802	0.0855416	-0.0639826	-0.192405	-0.0643768	-0.192361	0.162612	-0.0218365
P50895	-0.179899	-0.101947	-0.415344	0.225334	0.0236578	0.125555	-0.0344673	0.202584	0.0703312	0.0710535	-0.0653974	-0.112502	-0.0258516	0.0704779	0.146415
Q96C57	0.0562872	0.0491398	-0.0593751	-0.177241	0.0635406	0.0538365	0.0238916	-0.00688026	0.0736868	-0.0802634	-0.0718848	-0.0941488	0.0295979	0.107263	0.0325498
Q92974	0.0771444	0.0476864	0.0446634	0.000453955	-0.0212269	0.0126183	-0.0713248	0.00194548	0.0220207	-0.0141786	-0.0564844	0.0349607	-0.0133033	-0.0118341	-0.0531412
Q01518	-0.0176316	0.338416	0.0341611	-0.278082	0.227591	0.0965674	0.0877494	0.0395318	0.0876443	0.0630107	-0.221369	-0.349047	-0.164458	0.138631	-0.082714
Q9BVL4	-0.21456	-0.0364549	0.0954392	0.0676196	-0.030492	-0.061854	0.0912517	0.0855933	0.261998	-0.075186	-0.146525	-0.100102	-0.101631	0.0751349	0.0897687
Q9BUP3	0.0771027	-0.0780293	-0.107419	0.158097	-0.0329409	0.0710905	0.0198421	0.151566	-0.0821938	0.0314115	-0.0573258	0.0379599	-0.0340685	-0.0997458	-0.0553473
P61011	0.0247008	0.0173384	-0.183388	0.0188952	-0.132489	0.072337	-0.0257457	0.033756	-0.0628257	-0.0372264	0.159573	0.179196	-0.217359	0.146141	0.0070961
Q13641	-0.0493639	-0.153096	-0.0388229	0.0318265	0.0325585	0.0828802	0.0928158	0.0608587	-0.103484	0.0256879	0.030763	0.0785272	-0.072204	-0.095811	0.0768645
Q96AY3	-0.0215793	-0.159927	-0.267809	0.354362	0.0501347	0.0250823	-0.0441011	-0.0188206	-0.211809	0.0776676	-0.201028	0.243659	0.173631	-0.0560208	0.056559
O95865	0.0812937	0.00110148	-0.0312423	-0.18616	-0.0135186	0.0310639	-0.0699288	0.0462669	0.0493104	0.0203331	-0.0716215	-0.0481794	0.0648647	0.0586681	0.0677489
Q9NWH9	0.0231458	-0.0196449	-0.234179	0.0549975	-0.0151933	-0.00137261	0.0321237	0.00734531	0.018697	-0.00301608	0.027389	0.00164488	-0.00261804	0.0442224	0.0664586
O15230	-0.0400047	-0.123464	-0.113388	0.109551	-0.0195588	-0.0630097	0.0462146	0.0762857	-0.122053	0.0475886	-0.026916	0.135027	-0.0359019	-0.0546918	0.18432
P06396	0.0431489	0.211902	-0.383293	-0.336417	0.360937	0.0893429	0.0510487	0.161033	0.256033	0.0840507	-0.240174	-0.114482	-0.226429	0.0998041	-0.0565047
P53350	0.0418568	-0.0291541	0.0564143	-0.173105	-0.00819201	0.0094932	-0.00420117	0.0178765	0.015286	0.0123772	0.0954173	-0.0145897	0.0128241	-0.0324787	0.000175328
P28065	0.0661486	-0.0278402	-0.0115072	-0.0253478	-0.00888555	0.0437727	0.109119	0.055256	0.0540536	-0.0342722	-0.126178	-0.177188	-0.0272597	0.0886826	0.0214465
Q9Y2J2	-0.0127176	0.0234679	-0.250415	0.00103863	0.00559516	0.0115918	-0.00184611	-0.00724453	0.0182154	0.0368694	0.0867919	0.0323902	0.0273514	0.00560404	0.023307
Q9UJW0	0.0388472	0.130723	0.0951142	-0.0779012	0.0613106	-0.0280727	-0.0471291	0.0100133	0.0235473	0.0181164	-0.112297	-0.0697916	-0.0280143	0.0433245	-0.0577906
P08648	-0.0595012	-0.147824	-0.125217	-0.00308341	0.0176145	-0.0435801	0.0649147	0.0661624	0.0843293	0.0635062	0.128934	0.00847693	-0.0604282	-0.0780634	0.0837591
Q9NX00	-0.00318347	-0.269616	0.0224101	0.0629175	-0.0437024	0.0246436	0.00863156	0.00952402	0.0265848	0.0190144	0.0884743	0.0208851	-0.000581981	-0.000911642	0.0349101
P16278	0.121495	-0.199551	-0.275861	0.207867	-0.0894032	-0.186458	0.00924597	0.0155441	-0.0498842	-0.0195905	-0.0626693	0.20852	0.165676	0.0751843	0.0798857
P08240	-0.0977889	-0.27206	0.0846305	0.124518	-0.127048	-0.340732	-0.0773391	0.0762893	0.0594933	-0.00936869	0.155274	0.12865	0.12208	0.0219	0.1515
Q9BY50	0.0574696	-0.0483307	0.0414183	0.0301856	-0.0664523	0.047204	-0.00720612	0.00728894	-0.105975	-0.0113308	0.0149366	0.0104595	0.0193788	-0.0316776	0.0426313
Q9Y678	0.0724184	0.371182	0.116771	-0.449193	0.176137	-0.0740426	-0.047221	-0.0304284	-0.042597	-0.100537	0.0647368	-0.108095	-0.00726776	0.121164	-0.0630271
O43396	0.138007	0.125714	0.0432904	-0.311277	-0.0868882	0.0303224	-0.00507354	0.0632407	0.0634042	0.056015	-0.0108569	-0.0359966	-0.00227204	0.0783456	-0.145975
Q99519	-0.0543183	0.0298676	-0.206174	-0.135296	0.0763888	0.0639851	0.00783072	-0.0211644	-0.0463886	-0.0654161	-0.0234311	0.172597	0.136174	-0.0553147	0.12066
Q9Y6K5	-0.00343711	-0.0147454	-0.039447	-0.00723086	-0.062757	0.0549976	0.0339788	0.00724454	0.00321394	0.0276244	0.0310279	-0.030706	0.00650417	-0.0304659	0.0241979
Q9Y6R7	0.00905772	-0.0968939	0.0332463	-0.00125838	-0.136352	0.0703577	0.00886083	-0.00321409	0.0349345	0.0841571	0.102028	0.0491594	0.102328	-0.123735	-0.132675
Q7Z401	0.118291	0.0557085	0.0305986	-0.0835719	0.0778853	0.124075	-0.108473	0.165793	-0.0494599	0.0785086	4.52311e-05	-0.0669964	-0.0490428	0.0508415	-0.344203
Q8NCH0	-0.0569078	-0.0887732	0.00525085	0.126533	-0.000243721	0.0456887	0.0287931	0.0133169	0.0100683	0.0414364	0.0124397	-0.0851725	0.0373061	-0.113248	0.0235117
Q16836	0.0236755	-0.2431	-0.237766	0.382528	-0.133171	-0.036289	0.0211648	-0.0133764	0.00817978	-0.0197404	-0.102503	0.207364	0.282356	-0.164988	0.025666
P21912	0.00799665	-0.402248	-0.0319759	0.0790496	-0.340198	-0.0152376	0.0727706	0.10198	0.0766931	0.104462	0.469666	-0.145732	0.126142	-0.124224	0.020856
P51858	0.00925265	0.5337	-0.041833	-0.39151	0.0991607	0.130217	0.128985	0.137702	0.126473	0.119591	-0.425755	-0.320453	-0.240489	0.382425	-0.247465
P12956	0.439161	0.819979	0.333827	-0.590073	-0.259287	0.0445655	-0.0359778	-0.0174716	0.00222125	0.157203	-0.256283	-0.336444	-0.40579	0.591242	-0.486875
Q9Y3E1	-0.0433406	0.021693	-0.0902673	0.0240128	0.0259192	0.0531884	-0.000501763	0.0946926	0.0467297	0.0700983	-0.110927	-0.00501664	-0.00985719	-0.0496935	-0.0267302
Q00403	0.0997667	0.118573	-0.0656252	-0.0394339	0.0384166	0.00176137	0.001787	0.054541	-0.0999463	-0.0135572	-0.0834358	0.0169171	-0.0383757	0.0483134	-0.0397017
Q9Y320	0.0501797	-0.0443207	0.04645	0.0995703	0.000921535	-0.0204569	-0.174891	-0.0378086	-0.141733	-0.19897	0.171996	0.256824	0.0105825	-0.0283671	0.0100229
O15321	0.018598	-0.162622	-0.0583525	0.0346534	0.0873809	-0.0127724	-0.0690941	0.0530082	0.00197838	0.0156844	-0.240875	0.172086	0.0779789	0.00879009	0.0735577
O15514	0.0106032	-0.0922483	0.103869	0.0994066	0.00233838	-0.0858169	-0.0460579	-0.0421263	0.0958785	0.0282835	0.0731527	0.021795	-0.118096	0.0135677	-0.0645492
Q9BR76	0.0614209	-0.10577	0.010909	-0.52829	-0.00279825	0.0305021	0.115398	0.0402122	0.0273718	0.0213234	0.180391	0.00238787	0.163369	0.065265	-0.081692
P16989	-0.0712109	0.0179868	0.0365666	-0.246557	0.0657275	0.049999	0.0711003	0.0913984	0.0481676	0.0536048	-0.0200377	-0.199885	-0.107941	0.053947	0.157134
Q13501	0.0188228	-0.161021	-0.144548	0.010992	0.00174526	0.143113	-0.0315267	0.119805	-0.0117429	0.0929349	-0.0248723	0.11751	0.0371823	-0.0100981	-0.158296
Q9H2J4	0.0579442	0.142422	-0.0924847	-0.0439973	0.0434316	0.0191899	-0.0660053	0.0458312	-0.0244938	0.00027142	-0.012012	-0.0275697	-0.0634861	0.0164273	0.00453132
O00541	-0.0578679	-0.139115	0.400918	0.0230131	-0.0589258	-0.0543927	0.0718657	0.00641456	0.123628	-0.178125	0.345738	-0.110123	-0.183338	-0.0111065	-0.178583
Q8TD30	-0.137737	-0.207388	0.109574	0.0616068	-0.0864698	0.0360275	0.107983	0.0330603	-0.0257421	0.0951511	0.331335	-0.149039	0.0201737	-0.163706	-0.0248295
Q5T7N2	0.0239795	0.0216946	0.0361766	-0.112061	-0.0724399	0.0236705	0.0177862	-0.0111182	0.00175431	0.00867803	0.0253802	-0.0166034	0.111981	-0.1139	0.0550213
Q02878	-0.420276	0.180705	0.341837	-0.873202	-0.221662	0.12133	0.114847	0.144996	0.120108	-0.0236112	0.388529	-0.410707	-0.608274	0.547496	0.597885
P62269	0.0917008	0.472098	0.34916	-0.133734	0.142991	0.0927299	0.0240099	0.123144	0.0806542	-0.0310554	0.266904	-1.00818	-0.447878	0.0160831	-0.0386268
Q9BXR0	-0.00742529	0.0590278	0.0128989	-0.0238256	-0.0203278	0.00535804	-0.00337929	-0.00232723	0.00672435	0.0449979	0.0789971	0.00312937	0.0146135	-0.136635	-0.0318267
Q9UJ70	0.0109017	-0.00732143	-0.06788	-0.0903688	0.174994	-0.0945521	0.073515	0.0626731	0.0108378	0.0213472	-0.232746	0.0247893	-0.0496019	0.148585	0.0148273
P12429	-0.074765	0.397786	-0.309922	-0.57763	0.0855865	0.282687	0.289331	0.281768	0.190071	0.316768	-0.344827	-0.144395	-0.185594	0.00383988	-0.210705
Q9NZW5	-0.0355706	-0.207719	-0.205309	0.0160228	-0.0537713	0.0382852	0.0686989	-0.00953513	0.0428048	-0.0109963	0.148599	0.127041	0.0263114	-0.0268906	0.0820281
Q08J23	0.262926	0.00744109	0.302462	-0.559942	0.00768455	0.0931475	0.0555138	0.148828	-0.0892295	0.0950645	0.301495	-0.35174	-0.177893	0.145022	-0.24078
Q9H9Q2	0.0079633	-0.00128266	0.0435535	-0.0298546	-0.0118598	0.0122925	0.0149753	0.0231164	-0.0330214	0.0644767	-0.0666807	-0.124446	0.021614	0.0401868	0.0389667
Q5VYK3	0.219318	0.452395	-0.0233048	-0.346856	0.158353	-0.128919	-0.14616	0.0605782	-0.0888867	-0.0753164	-0.0689155	-0.0868499	0.0252076	0.0695668	-0.0202104
P51784	0.0513202	0.0812802	0.0227572	-0.0195673	0.0271115	0.0217836	-0.0421759	-0.00284737	0.013108	0.0124765	-0.0458613	-0.0581427	0.0205338	0.0226651	-0.104442
Q9UDX5	0.00391971	-0.16765	0.0990163	-0.0812417	-0.0283807	-0.0404928	0.0794972	0.0545867	0.0653419	0.00483265	-0.0235889	-0.00460019	0.0618176	-0.00208223	-0.0209757
Q12962	0.00139393	0.0632035	0.0607452	-0.000107047	0.00105678	-0.0269672	-0.00166342	-0.056846	0.00187962	0.0804764	-0.0341497	0.0474218	-0.0421778	-0.0640325	-0.0302337
Q14966	0.144495	0.0266086	-0.158821	0.188112	-0.158607	-0.131351	0.0345464	-0.0620883	-0.123582	-0.0423866	-0.104169	0.10769	0.114348	0.148254	0.0169516
Q9NVH1	-0.0310541	-0.00013219	0.00069579	0.0473992	0.0211571	-0.0824775	-0.0285526	0.0286658	-0.0716447	-0.151039	0.10125	0.193223	0.2136	-0.134409	-0.106682
Q93009	0.112035	-0.142328	0.242912	0.0422135	-0.109067	-0.114467	-0.12468	-0.0145629	-0.134365	0.0382329	0.355284	-0.0473086	-0.0833493	0.154608	-0.175157
O43709	0.0573599	0.0508491	0.0073296	0.000108044	-0.0938117	0.0309188	0.0351087	0.0583947	0.000371992	0.0661044	-0.0715946	-0.0267998	-0.00589823	-0.0133921	-0.0950488
Q9H0A0	-0.269331	-0.113956	0.36733	-0.328632	-0.0156133	-0.0377702	-0.0657399	0.215335	-0.179172	0.170757	0.327102	0.124396	0.189635	-0.103314	-0.281027
Q9P273	-0.0814954	0.0508962	0.0263722	0.0727082	0.0185015	0.0258382	0.0116946	0.0134973	-0.0587575	-0.0730391	0.0141425	0.0395338	-0.130169	-0.00847976	0.0787563
Q32MZ4	0.0512392	0.154655	0.0276025	-0.262706	0.00697433	-0.0182997	0.00961222	-0.0653143	0.0719703	-0.00484553	-0.0314106	-0.0549422	-0.069561	0.148219	0.0368067
Q9Y2Q9	-0.045731	-0.12542	-0.0451488	0.1236	-0.201622	0.063407	0.0506734	0.114331	-0.115671	0.0494182	0.0212115	0.104004	0.165821	-0.0933771	-0.0654952
Q9HAV4	0.112101	0.106152	0.0374333	-0.239346	0.0988899	-0.00336379	-0.0971519	0.0621543	-0.0424309	-0.0253299	0.134001	-0.114486	-0.177304	0.122214	0.0264678
Q13637	-0.112825	-0.0458008	0.0458208	0.0450936	0.0623261	0.015511	0.0704847	0.0186505	0.0219485	-0.02051	0.082872	-0.131622	-0.0946866	0.026225	0.0165127
Q6IQ22	-0.0610193	-0.165672	0.0292133	0.0114807	0.0151463	0.0366168	0.0295661	0.176613	0.00169376	0.0959817	-0.0482345	0.0713345	-0.013893	-0.146693	-0.032135
Q9P0M6	0.018909	0.00925468	-0.270844	0.209995	-0.00205229	0.112145	0.121852	-0.0931702	-0.170052	0.0482081	-0.0439988	-0.072293	-0.0905815	0.0375764	0.185051
Q07020	-0.825816	0.339951	-0.182478	-0.338446	0.068877	0.0907824	0.0510323	0.0762284	0.0796845	0.149713	0.129853	-0.206471	0.110536	0.247978	0.208575
P09467	0.07739	0.0233578	-0.0147334	-0.275878	0.0359832	0.0441456	-0.0249966	0.0609645	-0.0249106	0.0878408	-0.0263448	0.0800945	-0.017211	-0.0328232	0.00712164
Q92522	-0.10607	-0.140563	-0.111328	0.328453	0.133147	0.0667372	0.136749	0.0928424	0.157305	0.000332563	-0.549277	-0.102524	-0.0501615	0.0979984	0.0463597
P20618	0.107681	0.307981	0.0819585	-0.393977	-0.0243615	0.180387	0.0441052	0.0910673	0.0893982	0.111445	-0.00677275	-0.161987	-0.265277	0.0836697	-0.245319
Q6ZSZ5	0.0263418	-0.0589772	0.0302826	0.0363133	-0.148607	0.100027	-0.0125145	0.0452051	0.0132446	0.0129941	0.0841308	0.0370709	0.0652728	0.0239104	-0.254695
P16403	-0.0824609	0.0595354	-0.0669291	0.077091	-0.124372	0.0526201	0.0663484	0.08749	0.0722498	0.0297955	-0.133336	0.0562946	-0.113505	-0.0368558	0.0560346
O75607	0.0505233	-0.00914705	0.0941972	-0.0454119	-0.0906071	-0.0359648	-0.00958607	0.0144592	0.0387879	-0.00357128	0.161614	-0.060786	-0.0266269	0.0424482	-0.120329
Q6P1X6	0.065846	-0.0676482	0.0104238	0.0548943	0.0166803	-0.00134874	-0.0382989	0.041168	-0.0272254	-0.00515802	0.00893638	0.039365	-0.0346488	-0.0600992	-0.00288642
Q9BQA9	-0.0570132	-0.0497778	-0.0487488	0.109694	0.0320078	-0.0390564	0.035085	-0.0524174	0.00791705	-0.0373204	0.00541167	-0.0245284	0.0669624	0.0190879	0.0326961
Q9BWD1	0.0665335	0.396256	0.0388364	-0.249826	0.235957	-0.0350477	-0.0714084	-0.0991401	-0.025786	-0.0834865	-0.188927	-0.0375955	-0.0911171	0.198359	-0.0536079
O94966	0.0770115	0.0371277	-0.0599737	-0.0293445	0.00129513	0.00935812	-0.0232172	-0.015532	-0.00239541	-0.0396194	0.0401032	-0.0254295	0.0148251	0.0396093	-0.0238183
P10301	0.106175	-0.120195	-0.127756	0.0300463	-0.0247911	0.0479423	0.0586637	-0.0574886	-0.00104786	-0.12904	0.0595964	0.1209	-0.125283	0.0855351	0.0767427
Q9Y2Z4	0.0399786	-0.120187	-0.0309827	-0.022848	-0.124781	0.0316458	-0.125683	0.0728928	0.00494942	-0.0686942	0.245986	0.209027	0.0240001	-0.166069	0.0307656
Q96EY7	-0.135105	-0.235731	-0.101313	0.0774411	-0.0947137	0.00130803	-0.0278483	0.00889746	0.00355528	-0.13031	0.319773	0.194025	0.0769397	-0.0339335	0.0770148
O43172	0.00546552	-0.14591	-0.000325115	-0.0747229	-0.13066	-0.0614724	-0.0798278	-0.0950856	-0.00234032	-0.0706069	0.300121	0.195345	0.251287	-0.120759	0.0294932
P12109	0.0470612	-0.032174	0.0344501	0.0405099	-0.0168814	0.0119523	0.00839879	0.0134385	0.00759092	-0.0570348	0.0235593	0.00226262	-0.218989	0.0478559	0.0879996
P09669	-0.15498	-0.183206	-0.148374	0.367523	-0.316556	0.0315079	0.0252064	0.0747213	0.125951	0.0472253	0.116169	-0.139671	0.12582	-0.091408	0.120069
Q7Z4Q2	0.135841	0.175864	0.0105558	-0.162829	-0.0482015	0.0102669	0.0107689	-0.00145467	-0.0116962	-0.0156564	0.0427002	-0.177397	-0.0593356	0.113482	-0.0229078
P13639	0.227126	1.24145	0.615953	-1.55542	0.886427	-0.0472019	-0.278875	-0.0976448	0.0584668	0.0438736	-0.364307	-0.556547	-0.237874	0.321854	-0.25728
Q99497	0.0221521	0.287135	0.0920714	-0.507403	0.279954	0.125833	0.140015	0.0976455	0.139665	-0.280796	-0.451928	-0.056654	0.0432152	0.00286328	0.0662321
P33993	0.466222	0.365691	-0.0345164	-0.23123	-0.203826	-0.132934	0.0370753	0.0144902	0.161939	0.0965705	-0.101355	-0.0733241	-0.365772	0.0404815	-0.0395137
P23526	-0.0715318	0.550545	0.353131	-0.984564	0.348091	0.0821573	0.0842735	0.0838618	-0.00427955	-0.0439772	-0.146437	-0.236464	-0.17548	0.241371	-0.0806959
Q13616	0.0571674	-0.0418295	0.112521	-0.128749	-0.0856997	0.00938415	0.034548	-0.086149	0.0753933	0.0341536	0.0624921	0.0633526	-0.165752	0.214915	-0.155748
P78347	0.718551	-0.440575	-0.15499	0.835506	-0.332728	-0.0480744	-0.262471	-0.159128	-0.207914	-0.0269811	0.0539399	0.172016	-0.0637804	-0.0113164	-0.0720539
P33992	0.427837	0.0760524	-0.070504	-0.295239	0.0304836	0.0390825	0.083192	0.00633117	-0.0279357	0.000646278	0.0686367	-0.338768	-0.0884584	0.0252986	0.063345
P49736	0.127422	0.588289	-0.161264	-0.486251	-0.214521	-0.116983	-0.0684362	-0.232874	0.324103	0.366065	-0.203678	-0.35177	0.353699	0.219058	-0.142861
Q99808	-0.026789	-0.0811173	0.0866468	0.0699368	-0.0256461	-0.230353	-0.0180809	-0.0192533	0.00191534	-0.0348491	0.174488	-0.0300689	0.0997781	-0.0424752	0.0758678
P62906	0.0228763	0.235958	0.550159	-0.931819	0.078375	-0.0580406	0.413041	-0.0244221	-0.103685	-0.166093	-0.19853	-0.275267	-0.149554	0.108737	0.498263
Q9UJS0	-0.0368523	-0.290397	-0.339869	0.520027	-0.187473	-0.0265095	0.019105	0.0153628	-0.136091	-0.0819937	0.122225	0.194021	0.370253	-0.204106	0.0622965
Q9BWU0	0.0904287	-0.0183389	-0.0111913	-0.0449936	-0.0208286	-0.0110056	-0.0653435	0.00754129	-0.029044	0.0883175	0.0184567	-0.0303235	-0.0775762	0.0546634	0.0492375
Q96PD2	-0.0124703	-0.0369108	-0.042001	-0.00350413	-0.0227671	0.0129381	0.0257453	0.0150555	0.0347182	0.00758232	0.0208939	0.0498537	-0.012137	-0.0229943	-0.0140022
Q9Y3B7	-0.0661675	-0.030028	0.00679836	0.29519	-0.203585	0.051929	0.124151	-0.0182936	0.10946	0.148698	0.0584838	0.0249561	-0.0831057	-0.340971	-0.0775144
O60832	-0.0209915	-0.213795	-0.0132893	0.403253	-0.157601	0.0956222	0.0510729	0.132485	0.130568	0.00976477	0.022312	-0.250983	-0.104254	-0.123401	0.039236
Q86SK9	-0.0456479	-0.0364632	-0.0303877	0.034047	0.0693618	0.0259515	0.031342	0.0391128	0.0265965	-0.0396099	-0.0253586	-0.0432712	-0.087374	0.0405397	0.0411613
Q8WWA1	-0.178231	0.017234	0.0454049	-0.0272047	-0.0236624	0.0316351	-0.0353462	0.0523028	0.0940647	0.0850431	-0.0263768	0.0115715	-0.0310098	-0.0174585	0.00203343
P49748	-0.20903	-0.940633	-0.604215	0.705009	-0.388146	0.0977961	0.0469298	0.0993121	-0.0126074	0.00811768	0.0394904	0.54503	0.439271	-0.115967	0.289641
Q9NWT8	-0.0217094	-0.131099	0.0608563	-0.0290315	0.0412868	0.0213778	0.0540428	0.056761	0.0532823	0.0635707	-0.131436	-0.00331976	-0.116019	0.0282668	0.0531698
O14745	-0.13903	-0.0504355	0.0524909	0.16927	-0.0808507	0.0318807	0.0772928	0.0546409	0.0400417	0.0595529	0.0772758	-0.253565	-0.0104844	0.0435617	-0.0716421
Q9NY33	-0.0384539	-0.389896	0.00481071	0.197399	0.0760538	0.0866025	0.0977357	0.0630049	0.162505	-0.087674	-0.18912	-0.0856025	-0.142169	0.102225	0.142579
Q9P0U4	0.0486996	0.0351177	0.0262116	0.0562987	0.00109117	-0.0239237	-0.061611	-0.0454448	0.0570189	-0.0169557	0.0666102	-0.0727923	0.0538158	-0.0822054	-0.0419306
P23786	-0.0481546	-0.168035	-0.119586	0.131215	-0.0784593	0.0688701	0.0283149	0.0262272	-0.0397957	-0.101324	0.0320036	0.0824092	0.167885	-0.0206818	0.0391104
Q9Y5J7	-0.0549203	0.0302065	0.00209574	0.227531	-0.117169	-0.0111339	-0.0199883	-0.0407154	0.154759	-0.00769705	-0.015226	0.0580693	-0.0128285	-0.1371	-0.0558822
P22570	-0.126919	-0.155875	-0.367371	0.127242	-0.128998	0.0784688	0.165248	-0.0803791	0.118885	-0.0434424	-0.089484	0.19099	0.248556	-0.0955647	0.158645
Q8IX12	0.042946	0.0677402	-0.181176	-0.183197	0.0301051	0.0861558	-0.155382	0.0706927	0.0377454	0.0756487	0.218284	0.157531	-0.0521629	0.00626843	-0.2212
Q92979	-0.0596076	-0.0713022	0.121584	0.0574201	-0.0277893	-0.0163907	0.0798413	0.0153738	-0.167054	0.131426	0.177608	-0.108346	-0.114567	-0.0862803	0.0680837
Q96PD5	-0.0593622	-0.00559473	0.131626	-0.0151279	0.0223771	0.0185618	0.00912778	-0.00193701	-0.030724	-0.0411619	-0.0406677	-0.0210851	-0.0536319	0.155312	-0.067712
Q5RKV6	-0.0921003	-0.222512	0.0281486	0.0676103	-0.138407	0.0833202	0.0590734	0.125282	0.111327	0.0439447	0.0694976	-0.038185	-0.0584061	-0.0369376	-0.00165577
Q14651	0.0840264	-0.036266	-0.148003	-0.0586616	-0.0832456	-0.0478264	0.0365888	0.0683952	-0.0889342	0.100694	0.0138519	-0.0730195	0.0968965	0.0912422	0.0442616
Q9UKN8	0.24704	-0.168795	-0.0151452	-0.0426176	0.063608	-0.0411154	-0.0973525	-0.102495	-0.147447	-0.0162865	0.110904	0.0584162	-0.0455963	0.162105	0.0347771
Q6DT37	0.0906654	0.0505318	0.0186393	-0.090206	0.026468	-0.00841865	0.0795681	0.0733149	-0.0334456	0.0206896	0.013419	0.0325597	-0.128323	-0.0269132	-0.118549
P13987	-0.273874	-0.239656	-0.163376	0.449864	0.0599574	0.0954988	0.150833	0.176668	0.152099	0.0497233	-0.244138	-0.211487	-0.159959	-0.0033074	0.161153
O43464	0.0453239	-0.14439	-0.0359216	0.0671916	-0.0218716	-0.0691578	0.0717731	0.058115	-0.00142511	-0.151201	0.0379564	0.0690932	0.123179	0.0682996	-0.116965
Q15388	-0.0523887	-0.125311	-0.0932475	-0.051176	-0.00414505	0.089087	0.0409208	0.0336665	0.0234687	-0.0343123	0.0601936	0.0472731	0.0686635	-0.0503383	0.0476449
O43826	-0.00539178	-0.0109377	-0.0345878	0.0267014	-0.0443113	-0.0140686	0.0294622	-0.0332638	-0.0011648	0.040717	0.0412674	0.0317602	-0.0608843	-0.0188072	0.053509
Q8NHH9	-0.0200368	-0.074547	-0.0403883	0.0833978	-0.109122	-0.0429078	0.0321993	0.0070951	0.0617789	0.0986901	0.0606974	0.00406535	-0.0854579	-0.0370224	0.0615586
Q02817	0.0214832	0.0355205	0.0552431	-0.12602	-0.00432507	0.0328105	0.0574778	0.0194966	0.0261296	0.0189064	0.0196131	0.0343514	-0.172885	-0.0170971	-0.000704759
O75947	-0.0579922	-0.331701	-0.112027	0.427045	-0.154559	0.0324319	-0.00179111	0.110088	0.0478921	0.108877	0.204291	0.066506	-0.145207	-0.243985	0.0501311
Q9BRJ2	-0.0787811	-0.28989	0.095068	0.167553	-0.104118	-0.0451743	-0.0608706	-0.0704672	-0.00563254	-0.0245123	0.229284	0.0778444	0.0912567	-0.0395038	0.0579435
P34896	0.0490817	0.196871	-0.0795757	-0.231274	0.172863	-0.131694	0.0456748	0.0164864	-0.0153091	-0.010691	-0.120782	-0.0509874	0.061156	0.081154	0.0170253
Q9Y2Q3	0.273959	-0.221574	-0.350809	0.491891	-0.0937821	-0.0380898	0.085258	-0.0416104	0.0093476	-0.0910944	-0.183469	0.0770547	0.230019	-0.104305	-0.0427954
P40227	-0.137373	0.122384	-0.129508	-0.306863	-0.0797157	0.16396	0.159378	0.109268	0.120874	0.0568421	0.317717	-0.135804	0.0850578	-0.0342936	-0.311923
P50416	-0.0973258	-0.308391	-0.21748	0.182734	-0.124215	0.0305452	-0.0104435	-0.0387999	0.0273276	0.0682299	0.342224	0.0574513	-0.0213222	0.0599932	0.0494724
P18124	-0.521606	0.482212	0.0887678	-0.977505	0.20587	0.138666	0.183406	0.214625	0.149798	0.0517087	0.150777	-0.607858	-0.241341	0.3425	0.339979
Q13619	0.0532035	-0.0136663	0.128003	0.000201335	-0.0508184	-0.0250743	0.0977077	0.0375172	0.0694083	0.0251864	0.030934	-0.040069	-0.131512	-0.0494132	-0.131608
P35268	0.0280696	0.455991	0.296054	-0.286732	-0.0217849	-0.0577326	-0.025532	-0.0771921	0.0307657	0.0806803	0.17047	-0.235842	-0.107556	-0.137831	-0.11183
Q8WVM0	-0.0797212	-0.0915585	0.0660762	-0.0514412	-0.0422198	0.0202031	-0.0418188	0.0317871	0.0288888	0.0430842	0.0364402	0.0112585	0.0298345	0.108923	-0.0697363
Q6ZRV2	-0.0250239	0.113456	-0.26511	0.063756	0.0626821	0.0113532	-0.0334038	0.063324	0.046372	-0.119132	-0.043322	-0.0324067	0.0462646	0.0162798	0.0949104
Q9H910	-0.0470007	0.233723	0.00221521	-0.179022	0.0703556	-0.0307112	-0.00697444	0.0297189	0.0116703	0.0531243	-0.036102	-0.128881	-0.0274581	0.0731543	-0.0178127
P18887	0.0433357	0.0522179	-0.00116899	-0.0856414	0.087352	-0.0557716	-0.00192968	0.0629594	0.0850902	-0.147264	-0.127394	0.0361908	0.0190149	-0.0792296	0.112238
Q96IX5	0.0269397	-0.159803	-0.057363	0.0935446	-0.142525	0.027569	-0.0147276	0.0947667	0.0194172	0.0826706	0.07741	0.0650761	0.188607	-0.280985	-0.0205962
Q14684	-0.091604	-0.115352	0.112498	-0.128207	-0.0179907	-0.00288106	-0.0357194	0.0458092	0.0783851	0.117644	0.143939	-0.140214	-0.118561	-0.0390488	0.191302
Q6NYC8	-0.0355963	0.0486289	0.0674145	0.030305	0.0186594	0.0311412	-0.0190483	0.0534717	-0.0572269	0.019192	0.00651782	-0.151887	-0.0808321	0.0287573	0.0405024
P20674	-0.344604	-0.239741	-0.162414	0.443013	-0.15983	0.0333076	0.00757193	0.0961597	0.0343886	0.0898445	0.24323	0.0910955	0.083246	-0.0792434	-0.136024
Q96EY8	-0.104957	-0.0420991	-0.024297	0.243395	-0.0157316	0.0378509	-0.123919	0.015757	-0.046207	0.0395896	-0.0200017	0.0799126	0.0532167	-0.0447264	-0.0477829
P12931	-0.0593745	0.0162533	0.0507659	-0.0173063	-0.00727228	-0.0740837	-0.0403431	0.0239149	0.0731698	-0.04015	0.178357	-0.0725436	0.0143693	-0.00451021	-0.0412463
P52209	0.00852521	0.286703	0.144304	-0.217836	0.239042	-0.024529	0.0186017	-0.123544	-0.0392703	0.0412842	-0.160675	-0.0630225	-0.137105	-0.00508168	0.0326043
Q99439	0.078474	0.314421	-0.0549959	-0.208638	0.136453	0.0496977	-0.0382734	-0.0993157	-0.093318	0.0309064	-0.113928	-0.21537	-0.0984358	0.285176	0.0271466
Q9UJX3	0.0625478	0.0536394	0.0238111	0.0409647	0.0223796	0.0211788	-0.000740523	-0.0174367	-0.00174271	0.0284257	-0.00247438	-0.0438088	-0.120024	-0.076949	0.0102291
P54725	0.0454693	0.011386	-0.200424	-0.0107549	0.059804	0.0462512	0.0907159	0.0530839	-0.0736419	0.0831668	0.00892289	-0.174339	0.0031999	0.0599591	-0.00279909
Q14161	-0.0716632	0.0360987	0.0286539	-0.0368187	0.0634086	0.00277341	0.0313442	0.028176	0.0291231	-0.0218371	-0.035718	-0.0897591	-0.0698079	0.069636	0.0363902
P09923	0.146327	-0.0645596	-0.206219	0.211377	0.138324	-0.0358348	-0.0588183	-0.110697	0.0577863	0.109945	-0.25826	0.0446614	0.0764796	-0.118979	0.0684654
Q15417	-0.09728	0.248742	0.12901	-0.247073	0.058459	0.215398	-0.12827	-0.0619645	0.198117	0.147272	-0.232243	-0.231367	-0.152439	0.207358	-0.0537194
P35900	0.0107087	1.10377	-0.0924544	-0.054163	-0.0162723	-0.256735	-0.058595	-0.0374461	-0.0123625	-0.0749777	-0.0310094	-0.191009	-0.10274	-0.193685	0.00697208
Q9Y696	0.0492433	-0.040215	0.116264	-0.145606	0.140761	0.0827242	0.000498739	0.00719119	0.0629239	0.0249609	0.069894	-0.224572	-0.22893	0.163296	-0.0784345
P31431	0.0284895	0.0143706	-0.081974	0.0219451	-0.0350909	0.110875	-0.0205858	0.0129822	0.0823279	0.0426466	-0.0533949	-0.0716827	-0.0693405	-0.0597462	0.0781775
Q8TCJ2	0.170861	0.0883838	-0.190768	-0.0329366	-0.15421	-0.192961	0.0632667	0.0494609	-0.119119	-0.104357	-0.0771137	0.358986	-0.0598148	0.0326431	0.167678
Q99755	-0.0200612	-6.60965e-05	-0.0160053	-0.0925186	0.044021	0.043261	-0.00966417	0.00215978	-0.0356594	0.0560273	-0.00506887	0.0156096	0.0192698	-0.0148143	0.0135094
P49790	-0.0838351	-0.122243	-0.110709	-0.307598	0.176649	0.100518	0.13208	-0.034735	0.151665	-0.03824	-0.0678878	-0.13018	0.0361241	0.224819	0.0735715
Q92882	0.0392881	0.085165	0.0293125	-0.0337234	0.0832841	-0.0318067	-0.0150954	-0.0101443	-0.0169355	-0.00525967	-0.0868664	0.0393616	0.0320647	-0.120312	0.0116675
Q9P0S9	0.00999778	0.035811	0.0307981	0.0825226	-0.0687982	-0.0639009	-0.0691584	0.0158637	0.059232	-0.0138728	-0.05134	0.0695275	0.0238815	-0.0562716	-0.00429241
A3KMH1	0.145267	-0.200014	-0.0725615	-0.0758011	-0.110404	-0.0727354	-0.12343	0.170486	-0.0816558	0.0462727	0.325555	-0.00597136	-0.0550742	0.234926	-0.124859
Q15645	-0.0133307	0.209063	0.00129404	-0.296511	0.14386	-0.0542847	-0.0179171	-0.0268462	0.00600863	-0.0439261	0.0157699	-0.0152462	0.0226999	0.117444	-0.0480782
P48735	0.154912	-0.219018	-0.333466	0.501404	-0.0819625	-0.065046	-0.0946498	-0.0378291	-0.0113302	-0.00463571	-0.303863	0.164374	0.324065	-0.034179	0.0412245
O43175	0.178972	0.374759	-0.0465145	-0.742281	0.302707	0.0737032	0.0929643	-0.0372715	0.0767355	0.0919194	-0.0966633	-0.13753	-0.166049	0.123067	-0.0885172
P07996	-0.244693	-0.386707	0.20931	-0.173512	0.0119112	-0.181325	-0.071717	-0.0144611	0.0363775	0.106233	0.673656	-0.294668	-0.0904736	-0.0579091	0.477979
Q96G23	0.0398705	-0.0133907	-0.00740268	0.0471877	-0.012492	-0.208903	-0.0503018	-0.119655	-0.00144031	0.0263076	0.0631216	0.135012	0.0531786	0.0749353	-0.0260275
P06756	0.205704	-0.0984825	-0.288417	0.299467	-0.0669594	-0.150659	-0.0353791	-0.173142	-0.140937	0.0584386	-0.276482	0.324801	0.125445	-0.117388	0.33399
P10644	0.0352115	-0.0741434	-0.00401516	0.051893	-0.0112616	0.0893053	0.229275	0.0124853	0.0188872	0.0216145	0.113536	-0.00267821	-0.0791959	-0.155096	-0.245818
Q12769	0.131628	-0.258847	-0.163012	-0.126074	-0.134566	-0.0547493	-0.124526	-0.0370693	-0.0374083	0.0350172	0.212142	0.245076	0.166041	-0.0155386	0.161886
Q16698	0.162968	-0.24983	-0.356399	0.0116379	-0.0690428	0.184222	0.00794299	0.288502	0.193218	0.112408	-0.0617471	-0.127817	-0.0165781	-0.244873	0.165388
P12532	0.00602817	-0.00814903	-0.16914	0.114468	-0.156563	-0.0111599	0.0477768	0.0311211	0.153083	-0.00785181	-0.201853	-0.066021	0.158375	0.181501	-0.0716156
P12277	0.0359944	0.019988	0.0574286	-0.00948338	-0.0423807	0.0323648	-0.090847	-0.0347419	0.00280835	-0.0355602	-0.0894889	-0.0745424	0.00454296	0.237298	-0.0133802
Q9P2K2	0.00539325	-0.0577335	-0.0214387	0.0464529	-0.0089304	0.00572723	0.00907303	0.00348669	0.031954	0.00774571	-0.0503101	0.0441051	0.0350429	0.00262504	-0.0531932
Q9Y224	0.308939	0.125232	0.277343	0.0493092	-0.185557	-0.0787232	0.00459881	-0.0610833	-0.0383286	-0.0258554	-0.0908931	-0.0703473	-0.053108	0.0561753	-0.217701
O75340	0.0728649	0.191063	-0.0547871	-0.198448	-0.0197239	0.0314044	0.0334495	0.0721367	-0.105472	0.0555433	0.0633198	-0.041642	0.0647868	0.117155	-0.28165
Q8N7H5	0.112921	-0.225178	-0.0956305	0.169372	0.043674	0.0352522	0.0524346	-0.085019	-0.210738	0.0259459	0.0497332	-0.111228	0.058314	0.0669264	0.11322
Q12789	0.137235	-0.10039	0.150143	0.0232673	-0.171202	0.10423	0.0174425	0.0830527	-0.0562223	-0.25939	-0.0120206	0.085378	-0.0972331	-0.0793245	0.175034
P36551	-0.12771	-0.221118	0.134824	0.181714	-0.163316	-0.00532762	0.0469161	0.0584203	0.00377649	0.029666	0.26658	0.0274945	0.0807073	-0.159883	-0.152745
P30876	-0.118932	-0.0371443	0.0148297	0.00683199	-0.104484	-0.048936	0.205506	0.0644983	-0.0474602	-0.134799	-0.00709333	0.152829	-0.0247865	0.0179389	0.0612016
Q13330	0.198047	-0.0812684	0.0353555	-0.0338905	-0.0564725	0.0245814	-0.0254856	-0.140928	-0.0697747	-0.0472706	-0.00665512	0.172171	0.0954758	-0.14014	0.0762546
Q9BWM7	-0.0825382	-0.0971524	-0.0906971	0.298809	0.0107516	0.0144858	0.0177994	0.111553	-0.118272	0.047325	-0.0611639	0.101445	-0.114922	0.00414661	-0.0415697
Q05193	0.0236485	0.163235	-0.067623	-0.0385434	0.103741	0.0446307	-0.0593569	0.0239847	-0.0208349	0.00936071	-0.069512	-0.0107925	-0.0741501	0.0831809	-0.110969
O95140	-0.140258	0.025154	0.0562374	0.0479138	-0.142395	0.0893746	-0.0728695	0.0627438	0.0355503	0.0618911	-0.0918742	0.0902662	0.0548588	-0.154601	0.0780075
O96019	0.175081	0.0140806	-0.254634	0.225476	-0.180624	0.0323735	-0.0218378	-0.123952	-0.105395	-0.0678669	-0.0243704	0.190023	0.149041	0.0704238	-0.0778187
P10253	0.0437492	-0.177424	-0.0289478	0.165914	0.00131806	0.00611114	-0.00243288	0.0267462	0.0678618	-0.043569	-0.174014	0.106899	0.0550778	-0.0437134	-0.00357662
Q63ZY3	0.0910317	0.0244178	-0.0450987	-0.0239637	-0.117916	-0.0347376	-0.0671835	-0.00730413	-0.0328599	-0.0599501	-0.0124794	0.0726453	-0.026152	0.13248	0.107071
Q96KR1	-0.0499943	-0.294835	-0.072957	-0.0251262	0.0823995	-0.0615216	0.10929	-0.164202	0.147918	0.0245945	-0.0315812	-0.0589467	0.0666391	0.0804094	0.247913
P51116	0.158362	0.0809055	0.0198521	0.132595	-0.191666	-0.0797962	0.00586539	-0.135443	-0.043945	0.0284184	0.00840893	0.0898694	-0.021372	-0.0395858	-0.0124687
P55265	0.0498962	-0.343773	-0.119538	0.32225	0.111361	-0.117434	-0.24186	-0.130027	-0.252089	0.0958765	0.091582	0.408451	0.0332841	0.000748493	0.0912706
P46777	-0.445224	0.653481	0.27183	-0.506105	0.272907	-0.102041	-0.111396	0.287582	0.0666008	0.226607	0.110996	-0.674409	-0.309794	0.275963	-0.0169982
Q9BQA1	-0.00198101	0.0255243	0.00721831	-0.18162	0.0459185	-0.0111061	0.0173236	-0.00404488	-0.11532	-0.00303206	0.57619	-0.226819	-0.0473296	0.0307013	-0.111622
O00170	-0.0337857	0.101202	-0.0531099	-0.109383	0.0457202	0.0452356	0.0599865	0.0838003	0.0595719	0.0566924	-0.0124643	-0.041662	-0.0208096	-0.225565	0.0445702
P48681	-0.0808792	0.00926316	-0.0569993	0.0445969	0.0781863	0.0285274	0.0100491	-0.0340934	-0.0746756	-0.0555606	-0.0324022	0.11212	0.0254731	-0.075215	0.101609
Q6NZI2	0.149516	0.0443794	-0.205205	-0.202378	0.217307	-0.429459	0.00535611	-0.0284769	-0.301292	0.0537515	-0.0161647	0.0370281	0.10281	-0.0521238	0.624951
P41743	-0.0752202	0.254719	-0.000125512	-0.0530215	0.0400888	-0.0526555	0.0478033	0.0568623	0.0142622	-0.0459868	-0.0811156	0.0197653	-0.0876522	0.0630278	-0.100751
Q05048	-0.00729587	-0.0839563	-0.113859	0.284588	-0.0618163	0.150904	0.0778058	-0.0255145	-0.00429638	0.101313	0.0884358	0.109119	-0.0997297	-0.33885	-0.0768478
O75083	-0.12876	0.447247	0.268657	-0.129507	-0.0559229	0.123498	0.0646361	0.0163369	-0.00620055	-0.00211572	-0.1109	-0.2584	-0.231974	0.188019	-0.184613
O60508	0.0223886	-0.0590131	0.0559971	0.114869	-0.0925765	0.0488588	-0.0733058	0.0909393	-0.0149792	0.023279	0.0692956	-0.0419463	-0.0392302	0.000614358	-0.105191
Q14728	0.0435766	-0.00084012	-0.0270569	0.00449665	-0.0350026	-0.0058033	0.00234922	-0.0198129	-0.0605325	-0.00772748	0.0318013	0.0684883	0.0266348	0.00266945	-0.0232404
Q9HCU5	-0.0311997	-0.0227902	-0.0106635	0.184535	-0.0309474	-0.0624598	-0.167809	0.00905001	0.0495477	0.0651086	0.10972	-0.0759415	0.0834709	-0.123125	0.0235035
P50990	-0.0842647	-0.103862	0.496662	-0.431587	-0.177897	0.243922	0.214958	0.399172	0.227373	0.180216	0.273272	-0.15193	-0.090608	-0.150015	-0.845409
Q92747	0.0952429	0.128479	-0.178083	0.0514703	-0.290454	0.0521226	-0.0604606	0.0105915	-0.0763224	0.0974481	0.0582272	0.175327	0.157833	-0.0485144	-0.172907
Q9UMS4	-0.0530839	-0.520391	-0.233429	0.78583	-0.282942	0.0632774	0.0798762	-0.00702586	-0.0193236	-0.00727628	-0.041771	0.17298	0.151254	-0.202762	0.114787
P13073	-0.367406	-0.448822	-0.297722	0.728445	-0.252826	0.208869	0.241727	0.223804	0.229326	0.107027	-0.371026	0.00349077	0.146158	-0.282957	0.131911
Q9UNE7	0.0306365	-0.0567934	0.205708	-0.0758815	0.0633688	-0.00117195	0.0403419	-0.0227923	0.110732	-0.135913	-0.216972	-0.0509199	0.110129	-0.0982399	0.0977667
Q9BXS5	0.146563	0.163592	-0.0338582	-0.0606761	-0.0392374	-0.182691	-0.0255267	-0.0357386	-0.188548	0.0735761	0.122374	-0.0273144	0.155588	0.0189611	-0.0870632
Q9Y6Q5	-0.0479813	0.120273	-0.0207766	0.0564256	0.0239457	-0.0126039	0.058276	-0.182447	0.055129	-0.024189	-0.069389	-0.0377926	0.0244961	0.0858952	-0.0292608
Q15102	0.0903244	0.251473	-0.0686009	-0.241388	0.247876	-0.0086204	0.0202706	0.0450811	0.018879	-0.0270593	-0.218749	-0.0953141	-0.0229864	0.0326432	-0.0238298
Q92973	0.0897803	0.136769	0.150984	-0.237608	0.174957	-0.140456	-0.058991	-0.168156	-0.0203397	-0.0260659	0.0734371	0.129087	-0.107642	-0.0211753	0.0254195
Q9BSH5	0.021029	-0.0197865	0.033361	0.0759327	-0.0521878	-0.0287418	-0.0704047	-0.0289539	-0.0553876	-0.00871222	0.104739	0.0613712	0.0254671	-0.0395293	-0.0181959
P18077	-0.0149451	0.225875	0.0792561	-0.438545	0.0878789	0.100709	0.12443	0.121552	0.0102014	0.150436	0.0894275	-0.431988	-0.30152	0.0935731	0.103659
Q9HCE1	0.035239	-0.0331936	-0.115401	-0.122074	0.100504	-0.0487008	0.0318552	0.196583	0.0157405	0.0361846	-0.0273831	0.0282048	-0.0185879	-0.0273111	-0.0516596
P30520	0.116172	0.295565	0.0340987	-0.374859	0.00755961	0.00661326	0.0395742	-0.0208155	0.00508189	0.0640567	0.0145415	-0.160936	0.0420795	-0.096341	0.0276082
P62266	-0.0958471	0.477428	0.118248	-0.537778	0.272594	0.110533	0.0286583	0.121307	0.215338	0.18323	-0.2405	-0.4552	-0.229306	0.0296331	0.00166069
Q6UVK1	0.0353229	-0.0164524	0.044392	0.0418585	-0.0425291	0.0320085	0.0112543	-0.0529592	-0.128612	0.0118589	-0.10557	0.103745	-0.013981	0.0778897	0.00177315
P98175	0.160207	-0.0547934	0.0804322	0.179169	-0.0188656	-0.1114	-0.0420392	0.0495656	-0.07358	0.0242237	-0.118354	0.0422565	0.0701478	-0.137662	-0.0493071
Q5T0W9	0.00834316	0.0123108	0.0452313	0.0784051	-0.0972346	0.0645142	0.0358746	-0.0496126	0.0292382	-0.0706169	-0.0181266	0.0412931	-0.169771	0.025263	0.0648886
P50995	-0.0851431	0.0712632	-0.124662	-0.437151	0.000686951	0.213144	0.180345	0.0683082	0.157411	0.16953	-0.140453	-0.169686	-0.19947	0.0663295	0.229548
Q9H078	-0.206639	-0.283242	0.064691	0.118845	-0.230323	0.0628527	0.098809	0.102406	0.0433561	0.0886432	0.193807	0.0146538	0.0385514	-0.19374	0.0873287
Q96CS3	-0.0494969	-0.321962	-0.0849635	0.109919	-0.131207	-0.0434153	-0.0849383	-0.0781833	-0.0699972	-0.0301577	0.00435606	0.0223667	-0.0488482	-0.108964	0.915492
Q66GS9	0.000203776	0.0316953	0.0141129	-0.106566	0.0151098	0.0442837	0.0786582	0.0302368	0.0379495	0.00147311	0.00503201	-0.17862	0.0092011	0.0418807	-0.02465
Q9BQ61	0.00909532	0.0604485	0.0352277	-0.118552	0.0675044	0.00230528	0.0428797	0.0395341	0.0460321	-0.0155776	-0.084301	-0.0622263	-0.108308	0.0446796	0.0412586
O00461	0.0328799	-0.149007	-0.118391	0.15332	-0.0044925	0.0188138	0.0148173	0.012779	0.0852536	-0.0620769	-0.0659833	-0.0274887	0.0298101	0.0081298	0.0716365
Q03519	-0.114561	-0.0416365	-0.193449	0.0103407	0.0511335	0.0867762	0.0560792	0.126567	0.0320919	-0.0120294	-0.0377926	0.068784	-0.0832581	0.0555979	-0.00464357
O00161	-0.0683546	-0.165299	-0.0336416	0.0351297	0.00449413	0.0950512	0.0197201	-0.06929	0.0420266	0.100451	0.0536784	0.000970727	0.0260872	-0.118811	0.0777878
O00743	0.116522	0.15042	-0.0201703	-0.0351313	-0.0309883	0.0776889	0.0502474	-0.053095	-0.0663056	0.049691	-0.0694932	0.0526426	-0.0231514	-0.0587498	-0.140127
P60510	0.0484325	-0.00339556	0.111926	-0.08472	0.00199959	0.0760119	-0.0154354	0.0378068	0.0780363	-0.00857114	0.0712863	-0.096157	-0.114843	0.022398	-0.124775
Q02543	-0.0674606	0.251187	0.323292	-0.226037	0.186192	-0.0326619	-0.0581594	-0.0592537	-0.0785897	0.062714	0.151578	-0.384309	-0.294439	0.289825	-0.0638768
Q9UER7	0.0281409	0.025362	-0.0441152	-0.0404489	-0.0389147	0.0822644	-0.0322891	0.0515436	0.00863563	0.044967	-0.0276362	0.00514936	0.108246	0.0113555	-0.182261
Q96I51	-0.0104708	-0.0657647	0.000993531	0.0166561	0.0161451	0.0654048	0.0442183	-0.0403213	0.0177855	-0.000740577	0.0422467	-0.155598	0.0330731	0.0428814	-0.00650938
Q69YN4	-0.0407164	0.000505795	-0.0274683	-0.049723	-0.0550023	0.0438277	0.00286737	-0.0353699	-0.0264887	-0.0585211	-0.00534009	0.170128	0.236261	-0.0441233	-0.110837
Q7Z3C6	-0.0397646	0.140376	0.15967	-0.0408761	-0.0318094	-0.00524665	-0.0754568	0.0309542	-0.0152274	-0.0299872	-0.00851849	-0.0354848	-0.0466742	-0.0560904	0.0541362
P49005	0.0980757	-0.106531	-0.149918	-0.183382	-0.0783759	0.0497675	0.0629225	0.035799	0.043308	0.0337151	0.0434533	0.24903	-0.0183972	0.0866679	-0.166135
Q16851	0.0223059	0.287999	0.0148188	-0.228761	0.0748128	0.0375838	-0.000832294	0.0290119	0.0298801	0.0279448	-0.198828	-0.0434412	-0.0369169	0.085216	-0.100793
O60216	0.262105	-0.0921609	-0.121903	0.346014	-0.0883175	-0.137388	0.0160083	-0.119724	-0.0517157	-0.0402634	-0.118704	0.0745014	0.0577324	-0.0992098	0.113024
P26232	0.188923	-0.0744978	-0.0338357	0.074189	-0.0776911	-0.0710799	-0.0699745	-0.0999067	-0.145524	-0.0930221	0.114419	0.08619	0.0930136	-0.00347623	0.112273
Q53GS9	0.00849706	-0.0926129	0.0326887	0.240971	-0.0500391	-0.0539292	0.127591	-0.25258	0.188182	-0.164184	0.035058	-0.0231419	-0.0392362	0.0861412	-0.0434053
Q8IXB1	0.0258012	-0.14933	0.117216	-0.0656062	-0.0418298	0.105535	0.0389761	0.132718	-0.045813	-0.118882	-0.100122	0.111377	0.0775024	0.0057919	-0.0933349
Q8TAA5	-0.0205832	-0.0967636	-0.00478484	0.0679546	-0.0351336	0.0221919	0.0368891	-0.0232686	-0.00304271	-0.0392795	0.0418426	-0.0032244	-0.0391395	0.0777486	0.0185932
Q96GA3	-0.00670822	-0.0188568	-0.0935562	0.0315684	0.0544801	0.0131802	0.0197655	0.0456844	0.0440681	0.0186896	-0.0256779	-0.0353201	0.00307516	-0.103682	0.0532902
P10155	0.133571	0.254556	0.0273978	-0.057467	0.0167643	-0.0307251	-0.148546	-0.00689965	7.40699e-05	-0.0911437	-0.0626195	0.000321348	-0.00697714	0.00139055	-0.0296967
Q96M27	0.086619	0.0461249	-0.03464	-0.011061	0.00365902	-0.0290666	-0.101007	-0.0755249	0.0927688	0.0146462	-0.243313	-0.0547987	0.0413667	0.160289	0.103938
O95861	-0.0434223	0.221762	-0.0240958	-0.0203643	0.16938	-0.0272048	-0.0521423	-0.0895223	-0.132994	-0.0508634	-0.0190211	0.0590904	0.0572183	-0.141624	0.0938027
Q7KZ85	0.296893	-0.160465	0.00612216	-0.22004	-0.0848806	-0.27676	0.0635064	0.0613724	0.194849	-0.0259208	0.0904856	0.132296	0.0150191	-0.0308635	-0.0616136
Q9BZJ0	0.00853023	-0.207762	-0.0888427	0.106661	-0.108211	-0.0715544	0.205066	-0.0490295	-0.110148	-0.0862688	-0.0388964	0.284924	0.20992	0.0251283	-0.0795161
Q9UKV8	-0.0896578	0.145203	0.0177218	-0.0108244	-0.0430102	0.00598504	-0.0484796	-0.0226128	0.00182419	0.00303678	0.0440004	0.0317359	0.0342902	0.0182417	-0.0874539
P40925	-0.0109554	0.476336	-0.113717	-0.424489	0.32157	0.0210836	0.0656789	0.0182707	0.050862	0.0287634	-0.325242	-0.112632	-0.0811045	0.175177	-0.0896024
O43765	0.00782709	-0.120205	0.0683565	-0.191236	0.145827	0.0872287	0.103918	-0.0195021	0.0816231	0.0680136	-0.00838115	-0.0634507	-0.174123	0.0676727	-0.0535682
Q8N3U4	0.111964	-0.0180696	-0.130123	0.149155	-0.180906	0.0678168	0.0115166	-0.149189	0.0383343	-0.0509698	0.0929474	0.0761697	-0.00440376	0.00986394	-0.0241065
Q8WVM7	0.101728	0.00656603	0.0384674	0.0587815	-0.00538438	-0.00767901	0.0221615	-0.0566638	0.0527663	-0.0333025	-0.117185	-0.0125994	-0.00568715	-0.0697477	0.0277783
Q6PI48	-0.0801392	-0.431821	-0.121523	0.352843	-0.093867	0.0359128	-0.0641358	-0.0521953	-0.0949779	-0.0209444	0.270781	0.222059	0.112972	-0.18774	0.152775
P49590	0.0341151	-0.0577899	0.0394087	-0.00243883	-0.116608	-0.0122247	0.0205794	0.0692617	-0.0233993	-0.0368688	0.152918	-0.0100274	0.020463	-0.0797254	0.00233586
P62191	-0.172468	0.228867	0.122501	-0.203525	0.0418617	-0.124414	0.114903	-0.425523	0.0646147	-0.156184	-0.101637	0.0209188	0.238597	0.247575	0.103914
O43390	-0.00447688	-0.289095	-0.322768	0.50317	-0.253814	-0.147959	-0.174662	0.00869614	-0.0523495	-0.09387	0.245375	0.40877	0.320275	-0.229533	0.0822413
Q96SI9	-0.0318124	-0.100236	0.088977	0.114407	-0.149117	0.029171	-0.0638815	0.0448404	-0.0780401	0.0904389	0.0948269	0.0127647	-0.029412	-0.0361434	0.0132166
O14672	0.0489731	-0.0533454	-0.196668	0.0718694	-0.030458	-0.133154	-0.113101	-0.0987495	-0.0453349	0.0513154	0.0252374	0.232493	0.144038	-0.0927793	0.189663
Q16822	0.103712	-0.329308	-0.040327	0.420627	-0.195059	0.0287469	-0.00320473	0.0327405	0.246425	0.0508172	-0.158863	-0.0572241	-0.0216421	0.0509413	-0.128382
O00425	-0.00856873	0.00761114	-0.0170358	-0.0812063	0.141389	-0.0210876	0.101841	0.164849	0.0248571	0.0452589	-0.113828	-0.210194	-0.205162	0.0491282	0.122149
Q9H6T3	0.00262941	-0.0230702	0.0316761	0.0194168	-0.0252663	0.00635091	0.0803977	-0.0379831	0.0751568	0.145133	-0.0987093	0.0478135	0.0632574	-0.120989	-0.165814
Q15424	0.057295	-0.0953153	-0.141628	0.251126	-0.0663026	0.0296958	-0.0850564	-0.0326874	-0.150387	0.0359316	-0.0153646	0.157356	0.120627	-0.161765	0.0964754
Q9Y2L1	0.0333951	0.00201936	0.109795	-0.0935272	0.0392209	-0.052311	0.207682	0.154099	0.0217046	-0.106267	0.0272663	-0.0391353	-0.0168833	-0.187376	-0.0996816
P51532	0.18142	-0.0135459	-0.200598	0.0337206	-0.02175	-0.0163653	-0.0540621	-0.0629833	-0.126786	-0.0521866	0.181413	0.0217154	0.0661355	-0.0420656	0.105938
Q9BXW9	-0.0614944	0.0875149	-0.0721919	0.0220517	0.0222444	0.0387075	0.0511932	-0.0530058	0.0333375	0.0280578	-0.0551925	0.0694094	-0.062601	0.0573681	-0.105399
Q4G0J3	-0.0532696	-0.0771785	-0.172492	-0.0897793	0.0292816	-0.0392432	0.092421	0.149059	0.164503	0.106767	-0.0180771	-0.0108094	0.0638139	-0.183658	0.038662
P48637	-0.162912	0.283012	-0.0037791	-0.152432	0.186207	0.0423716	0.0703833	-0.125728	0.066038	0.0307707	-0.065141	-0.0940672	-0.084994	0.0948863	-0.084615
O76094	0.0964101	0.261613	0.141502	-0.214499	0.0335478	-0.21781	-0.092407	-0.0111698	-0.0417282	-0.0493044	0.0833748	-0.230986	0.0529266	0.197087	-0.0085561
Q15435	0.0618078	0.11131	-0.135654	-0.189525	0.0972461	0.0817601	-0.00738618	-0.106407	0.111865	-0.0599695	-0.157128	0.0557355	0.0714476	-0.0255471	0.0904446
Q96T23	0.0979184	-0.103052	0.0160681	0.2886	-0.0841714	-0.0182552	-0.00259328	-0.019645	-0.160565	0.015023	0.0507562	-0.0788166	-0.00300022	0.0236378	-0.0219049
O75223	0.152183	0.202754	-0.19205	-0.243825	0.159523	0.0834004	-0.0927723	0.0363534	-0.0728317	0.102779	-0.0580384	-0.125127	0.0692321	-0.0656855	0.0441046
P56377	-0.167423	0.025812	-0.0870447	0.353696	-0.143001	0.0374749	-0.0162055	0.0432077	0.195336	0.206524	-0.131722	-0.116575	-0.0452098	-0.173125	0.0182545
P61966	0.0714832	0.140309	0.00642387	-0.0666414	-0.0104757	-0.0231186	-0.0275027	-0.0354273	-0.0639467	0.0281816	-0.102418	0.0736268	0.0972723	-0.0108386	-0.076928
P0CG08	0.00011809	0.0104453	-0.00382455	0.0311101	0.0096996	0.038154	-0.00828611	-0.0057515	0.00145619	0.0205357	-0.0203541	0.074263	0.0571782	-0.0032262	-0.201518
Q8WX92	0.223348	-0.0455796	-0.0108585	-0.119681	-0.100921	-0.00681879	-0.081209	-0.0115541	-0.0527735	0.0099138	0.00562658	-0.0664176	-0.046838	0.219375	0.0843888
Q9BY44	0.161073	0.124016	0.151715	-0.428936	0.0494022	0.0239676	0.0702408	0.00156906	0.00837786	-0.0184089	0.003875	-0.0160841	-0.0684126	0.0640385	-0.126434
Q9NZI8	-0.0981409	0.126674	-0.028211	0.0130919	-0.146926	-0.068326	0.0949568	0.0910298	0.119518	-0.0918281	0.00940792	-0.206805	0.11878	0.00987636	0.0569007
Q9Y6M1	-0.0495294	0.101859	0.0549685	0.052503	-0.0434147	0.10475	-0.0169852	-0.066197	0.0907376	0.0993033	-0.221555	-0.172935	-0.0197811	0.00747183	0.0788038
Q86X76	0.0850746	0.146335	-0.714011	0.0200238	0.205555	0.179906	0.143088	0.173843	0.134468	0.0880439	-0.703373	-0.0745126	0.0341822	0.0802131	0.201165
Q9Y5Q9	0.0722211	-0.114612	-0.0589428	-0.00168695	0.00692653	0.11401	0.0407062	0.0782779	-0.109002	0.0305118	-0.107612	-0.0203561	0.140704	-0.0131999	-0.0579462
Q9BPX3	0.00396308	0.201728	0.16559	-0.231993	-0.09665	0.0207025	0.0505595	-0.124404	-0.0668498	0.0370598	0.0409284	-0.189809	-0.18082	0.19001	0.179986
Q9GZP9	0.0296303	-0.00427814	-0.102712	0.032948	0.0283765	0.0291392	0.0139354	0.0228676	0.0173381	0.00914548	0.0186607	0.00892194	-0.0828596	-0.0445395	0.0234263
O14657	0.0885568	-0.0291909	0.0376339	0.117361	-0.192904	-0.00442557	-0.0273663	-0.0598222	0.0141886	-0.191716	0.115054	0.0730316	0.0595035	-0.0415691	0.0416645
Q9ULV4	-0.322447	-0.435108	0.421196	0.0402137	0.159098	-0.00562846	0.0626385	0.0646562	0.312106	-0.097903	0.00157516	-0.15784	-0.116055	0.00765814	0.0658407
Q7L2E3	0.0632766	-0.152333	-0.107086	0.00671346	-0.0616534	0.0549892	-0.106503	-0.229743	0.0754457	-0.115171	0.27558	0.282569	0.215911	-0.0633428	-0.138653
Q16576	-0.0577129	-0.158569	0.0416302	0.178181	-0.210072	0.054315	0.0458539	0.184046	0.0850154	0.0658478	-0.0746842	-0.22335	0.0588104	0.0476239	-0.0369348
P07339	-0.142467	-0.413441	-0.781425	1.05054	0.16053	-0.106892	0.0151842	-0.0430728	-0.144457	-0.204421	-0.549759	0.561998	0.504662	-0.224651	0.317666
O15355	0.104154	0.11858	0.0561698	-0.312823	0.140863	0.0588378	0.0164668	0.124222	-0.0255392	0.0407868	-0.0141484	-0.158347	-0.190731	0.124954	-0.083446
P49750	0.131085	-0.0774985	-0.0307736	-0.0214699	0.160821	0.0274452	-0.200925	0.134008	-0.110602	0.0292763	-0.0902344	-0.174691	0.187691	-0.0582536	0.0941225
Q15035	-0.052353	-0.0508426	0.0131371	-0.0836677	-0.156049	0.0374177	0.0173332	0.19973	0.0282413	0.0400609	-0.00893522	0.023677	-0.00820586	-0.0401942	0.0406502
P15121	-0.105724	0.30388	-0.209231	-0.240191	0.0407604	0.152633	0.183349	0.180033	0.0124312	0.126268	-0.370159	-0.266389	-0.0677182	0.126911	0.133145
Q13042	0.0302273	0.0799096	-0.0711995	0.150133	0.121564	0.0292864	-0.0512504	0.0289191	-0.0805324	-0.065955	-0.0784119	-0.0475136	0.022463	0.058298	-0.125938
P52292	0.0202942	0.00420965	0.147005	-0.436685	0.171486	-0.0533582	-0.0201661	-0.0654006	0.0178968	-0.0492079	0.301229	0.0414751	0.0469688	-0.118258	-0.00748801
P42285	-0.0313862	-0.0111042	0.0867066	-0.0298072	-0.249123	-0.0617408	-0.139343	-0.25241	0.0273864	0.0623299	0.135648	0.238093	0.496682	-0.385081	0.113151
P28066	0.318716	0.178072	0.0893757	-0.379853	0.0519701	-0.0327595	0.0764284	0.016547	0.0586536	-0.0329405	-0.0351225	-0.190465	-0.117223	0.22916	-0.230559
Q8IY67	0.0841389	0.186685	0.0829057	-0.323239	-0.117789	0.0104648	-0.0269144	0.0294691	-0.155018	0.066711	-0.0421579	0.0267358	0.0130799	0.258791	-0.093862
Q9Y697	0.0169647	-0.160261	0.0205425	0.19289	-0.0623664	0.00755839	-0.00705896	-0.172989	-0.115222	0.0449922	0.0866736	0.123808	0.0726208	-0.0528811	0.00472918
O00410	0.0444385	0.312799	0.401824	-0.399217	0.00978429	0.0778413	0.00580946	0.0393897	-0.252881	-0.0328648	-0.105069	-0.15173	-0.0943176	-0.0696907	0.213884
P08962	-0.0854106	-0.0595585	-0.0755873	0.190455	-0.121378	0.102555	0.0272289	-0.000100888	0.0134715	0.0756735	-0.00508857	-0.014995	-0.0104405	-0.0448147	0.00799035
Q9Y5L0	0.0793575	-0.0714368	-0.0755961	0.0427442	0.316735	-0.0433273	-0.0479133	-0.058689	-0.0814487	-0.112141	-0.0360248	-0.035312	-0.0857144	0.32533	-0.116563
Q16678	-0.0850892	-0.0812935	0.00223106	-0.0155524	-0.0614386	0.0173751	0.0264475	0.0568413	0.0182367	0.042721	0.00765838	0.0770511	0.025282	-0.0575389	0.0270685
P28070	0.0871261	0.234684	-0.116199	-0.227353	0.154019	-0.161319	0.00544332	-0.0425833	0.149839	0.148089	0.0456563	-0.118137	-0.0233774	0.0154464	-0.151335
P21926	0.0711004	-0.086434	-0.129284	0.413198	0.015167	-0.00519492	-0.0479209	0.0587672	0.0291053	-0.0611538	-0.298311	0.0772315	0.138476	-0.0343166	-0.140429
O14980	0.434861	0.249936	0.19666	-0.293576	0.0993657	-0.0244347	-0.106793	-0.18767	-0.238302	-0.0217992	0.0399313	-0.0989233	-0.0809195	0.163208	-0.131543
O75976	-0.0444713	-0.0124255	0.0728296	-0.134872	-0.0734756	0.0544365	0.0846959	0.030643	-0.0332097	0.097134	-0.0731094	0.0142183	0.112153	0.0213352	-0.115882
Q12765	0.0280486	0.0498678	0.115568	-0.283341	0.0557836	0.0638968	-0.000667972	0.0260582	0.0652565	-0.0606994	-0.0421445	-0.12904	0.0122059	0.153812	-0.0546048
P62081	0.417115	0.5426	0.703942	-0.119226	-0.07493	-0.15746	-0.21873	-0.204607	-0.16889	-0.272189	-0.0795338	-0.459642	0.0400282	0.337163	-0.285638
Q6YP21	0.111104	0.117988	-0.100621	0.0169988	-0.0500075	0.0872341	-0.0120591	0.0198223	-0.0493987	0.00306146	-0.0404444	0.0876765	-0.0353514	-0.0971873	-0.058816
P82675	0.162279	-0.197734	0.0794373	0.197107	-0.190036	-0.172406	-0.0946151	0.0147262	-0.0170878	-0.153896	0.0604773	0.277481	0.0299058	0.0559605	-0.0515999
P37268	-0.0095644	-0.205368	0.226147	0.199201	-0.0703633	-0.213688	-0.242429	-0.221265	-0.173861	-0.228105	0.499655	0.205396	0.16214	0.0333746	0.0387306
P21980	0.204556	0.573503	-0.0339869	-0.774174	0.468447	0.022889	0.0393357	-0.0219861	0.0839459	0.124198	-0.0983622	-0.288149	-0.262891	0.10092	-0.138246
P09496	-0.061905	-0.0283361	0.321178	0.124729	-0.240718	0.0655195	0.058513	-0.183989	0.102778	-0.000416121	-0.0407095	-0.0921827	-0.0753105	0.117251	-0.0664028
P02794	0.099131	0.134399	-0.245098	0.17004	0.0930953	-0.0762584	-0.0495893	-0.116435	-0.109631	-0.0858007	-0.22345	0.119007	0.252985	-0.0348352	0.0724405
Q9BVP2	0.0608529	-0.183065	0.0410227	-0.305662	-0.155172	0.0643585	0.0321716	0.0140195	-0.0769865	0.0872895	0.189378	0.11219	0.14424	-0.0869424	0.0623065
Q99832	-0.00406658	0.222666	0.246795	-0.487721	-0.124136	0.0365798	-0.0248019	-0.053962	0.0731226	0.264874	0.497928	-0.0850642	-0.0746695	-0.0696387	-0.417906
Q96E39	-0.0195522	0.00110892	0.0278276	-0.0517256	0.0481039	0.0142768	0.0377862	0.0442955	0.01352	0.00689633	0.0113644	0.00450615	-0.0693669	-0.0770128	0.0079717
P38159	-0.507455	-0.404563	0.0253746	0.160336	0.0701844	0.206751	0.216223	0.241725	0.183743	-0.0644274	0.019636	-0.211914	-0.194884	0.0123584	0.246912
Q8WWK9	0.0132648	0.0138742	-0.100698	0.0543271	0.0192073	0.0256396	0.0136879	0.00376132	0.00925787	-0.010324	-0.00637902	-0.118779	0.0086226	0.0406796	0.0338572
P25205	0.289405	-0.053098	-0.110613	0.0749615	-0.0915826	0.51034	-0.0897592	0.0697692	-0.0226207	0.0170776	-0.176503	-0.318318	-0.311213	0.300081	-0.0879271
O00567	-0.091276	0.084992	0.0234712	0.230726	-0.390111	-0.0456188	-0.120005	-0.0881288	0.127596	0.00415523	0.466087	0.268191	-0.0634708	-0.359783	-0.0468237
P49023	-0.000919585	0.0561317	0.176219	-0.105068	0.0213304	0.0210732	-0.00888771	-0.0393666	-0.00555829	-0.0655294	-0.0188551	-0.107573	-0.0655672	0.138507	0.0040644
P09038	0.0149502	0.0119029	-0.057649	-0.0224359	-0.0409793	0.00323452	0.028074	-0.00698498	0.0178495	-0.0300075	0.0474912	0.0494543	0.00461982	-0.0202387	0.000718855
Q9BTY2	0.112039	0.0210202	-0.101123	0.067954	-0.0154749	0.0198615	0.0589957	0.0147163	-0.0418056	0.0220784	-0.118384	-0.0255353	0.0531193	-0.118585	0.0511241
P61923	-0.124777	0.216118	0.0609419	-0.183439	0.114664	-0.0123425	0.00912179	0.084208	0.0164604	-0.0361533	-0.0586496	-0.0309816	-0.00113641	-0.0362173	-0.0178168
Q8WYP5	0.454095	-0.0848927	-0.191676	0.52959	-0.108882	-0.137248	-0.210286	-0.14519	-0.184145	-0.124892	0.219066	0.343128	-0.137633	-0.112416	-0.108618
P09960	0.0820414	0.268761	0.134219	-0.247748	0.327834	-0.0247477	-0.130223	0.159034	-0.000909945	0.10919	-0.241391	-0.18402	-0.266344	0.0129183	0.00138523
Q12904	0.0230357	0.256014	0.0395749	-0.441098	0.128321	0.0210414	-0.000388834	-0.0109093	-0.0116076	0.0615079	-0.0754429	-0.0738095	-0.00852504	0.200622	-0.108336
P40763	0.0135431	0.132375	-0.113491	0.0566695	0.0703747	-0.0468207	-0.11552	0.00966335	0.0949613	0.00573007	0.0569127	-0.0230456	-0.130632	0.0572227	-0.0679424
P40616	-0.039586	0.112311	0.116326	0.22006	-0.0992948	-0.170583	-0.150769	-0.109859	-0.0905074	-0.120236	0.0802808	0.0695126	0.200376	0.0999804	-0.118012
P00387	-0.108097	-0.231414	-0.216862	0.428009	-0.179419	-0.0840038	-0.0392112	-0.0881164	-0.0465853	0.0140205	0.0462722	0.372627	0.31663	-0.122058	-0.0617912
Q9Y263	0.068316	0.340124	0.0905245	-0.21072	0.0429714	0.0249426	0.0126003	0.0725317	0.114296	-0.0690268	-0.166603	-0.0773115	-0.215769	0.176001	-0.202878
Q15363	-0.154556	-0.211711	-0.046289	0.486506	-0.139365	-0.00244819	0.0794083	0.108726	0.071879	0.03828	-0.0670385	-0.093922	-0.12619	0.055924	0.000797336
P08133	0.071995	0.031328	-0.0770796	-0.0358516	-0.191489	-0.0867259	0.0490157	0.104814	0.0573661	0.0955518	-0.00373729	0.0614093	0.0721968	-0.10219	-0.0466035
P51114	-0.0142779	-0.0819871	0.10439	-0.00542319	0.0444543	-0.0484201	-0.0933177	0.0705635	-0.0226067	-0.0235185	0.092749	-0.321743	0.113575	0.103382	0.082181
Q8NFV4	-0.0117958	-0.280111	-0.213012	0.251553	-0.0250454	0.00555469	-0.00829818	-0.0126403	0.044807	0.0554778	-0.00434543	0.0450383	0.0584586	0.0246993	0.0696596
Q07960	0.0637884	0.100413	-0.122333	-0.0209902	0.157943	0.0743946	0.0447765	-0.0113817	-0.0392312	0.0521088	-0.250367	-0.0656648	0.00630796	0.0230626	-0.0128278
P60900	0.0556853	0.401904	0.0821285	-0.380857	-0.00500014	0.05795	0.032676	0.0906644	0.129105	0.150641	-0.0968484	-0.338735	-0.0818091	0.0606107	-0.158115
Q14157	0.119419	0.256172	-0.00471715	-0.157895	0.151517	-0.182204	-0.00955241	-0.182996	-0.0543798	-0.053499	0.0766923	-0.0825331	-0.0855861	0.121114	0.0884486
Q9NY93	0.0175086	-0.0757886	0.0623209	-0.214617	-0.0175485	0.0863442	0.0107083	0.074995	0.0661724	-0.0618824	0.32371	0.0781785	-0.152092	-0.0547962	-0.143214
Q68CP9	0.0353985	0.214026	0.0107649	-0.0737851	-0.00948205	-0.00446075	0.013523	0.0172935	0.0269192	0.0381187	-0.0624279	-0.0818503	-0.0744252	-0.0162477	-0.0333646
Q16513	0.204484	0.0637967	-0.1031	-0.102954	0.0677004	-0.0538991	0.0483895	-0.0795878	-0.027523	-0.16902	-0.0210359	0.06816	0.0971831	0.0360819	-0.0286753
Q08752	0.0239133	0.043611	-0.121259	0.106884	-0.0571378	-0.0612817	-0.00870737	0.0911622	0.176944	-0.0210691	-0.331137	-0.00887188	0.0464007	-0.0419822	0.16253
Q13472	0.0700051	-0.00867503	0.128259	0.0168334	-0.0898671	-0.0304807	-0.0288347	-0.0141832	-0.0253573	0.0121349	0.00619979	0.0157355	-0.0218141	-0.0115935	-0.0183626
Q9UHX1	0.0278953	-0.0367447	0.0208959	0.190303	-0.20551	0.0376956	-0.0779545	-0.0477345	-0.0784059	0.110404	0.364649	-0.0376132	0.177901	-0.251479	-0.194302
Q68CQ4	-0.0147586	-0.0442116	0.0301058	-0.0576835	0.132927	-0.0102979	0.022678	-0.0100491	-0.00342203	0.0270871	-0.0241699	-0.072553	-0.0559524	0.0647427	0.0155572
Q92520	-0.0654665	-0.197142	-0.141678	0.339771	-0.190142	0.0480908	-0.00672746	0.110074	0.0889907	0.0460745	0.0698647	0.054982	-0.0145877	-0.0302681	-0.111836
Q9H0E2	-0.0775644	0.10833	-0.076272	-0.0662265	0.0698878	-0.0485394	-0.0141202	-0.00844489	-0.0380007	-0.115078	0.0464766	0.053605	0.100405	0.0227572	0.0427846
Q71UI9	-0.419288	0.0054685	-0.618551	0.459368	-0.196797	0.221275	0.080815	0.26714	0.117081	0.436485	-0.84496	0.451841	0.512054	-0.414608	-0.0573233
O15228	-0.00878576	-0.103129	-0.153054	-0.0177129	-0.0251167	-0.035671	0.0647428	0.0316654	0.139531	0.0534465	0.103798	0.0614278	-0.0943554	-0.0304088	0.013622
O43242	0.0193277	0.305832	0.392688	-0.294778	-0.0726689	0.0437529	0.0871463	-0.0247302	-0.058787	-0.206854	-0.0528769	-0.081774	-0.0477168	0.198557	-0.207118
Q99614	0.0678119	0.0875127	0.0334982	-0.00529479	0.0371669	-0.0202027	-0.0030797	0.0113301	0.0158833	0.0301787	0.00595602	-0.173908	-0.14861	0.0424788	0.0192792
Q9BT78	0.000128944	0.0903942	-0.0157722	0.191715	-0.289311	0.348264	0.0103837	-0.0524881	-0.0405109	-0.0853979	-0.135541	0.2336	-0.106204	-0.011722	-0.137539
Q5TCX8	0.0298234	-0.0117666	0.0337419	0.00448378	0.00963971	0.0552345	0.0429159	0.114381	-0.03651	-0.0686578	-0.0801161	-0.0656994	-0.0465534	-0.0292782	0.0483612
Q6PJT7	0.0155329	-0.312572	-0.12439	-0.205341	-0.0848875	0.0454921	0.187266	0.184257	0.178414	0.187288	-0.220607	0.104669	0.0709302	-0.190256	0.164204
P30153	-0.0526293	0.224885	0.139723	-0.551599	0.0927932	0.0573469	0.0173974	0.0996793	0.114037	0.125719	-0.0206319	-0.368612	-0.12065	0.302316	-0.059774
Q8N684	0.0289789	0.785531	-0.313502	-0.919854	0.574171	-0.0558115	0.0297129	0.010593	0.00871885	-0.0343447	-0.158753	-0.400303	-0.337561	0.61592	0.166503
Q16630	0.0520416	-0.40198	0.17689	0.183453	0.0440344	0.0242265	0.085595	-0.0937772	-0.0715177	0.123452	0.0938551	-0.224147	0.0941242	0.029022	-0.115273
Q12996	0.0992125	-0.443401	-0.00675018	-0.119441	-0.160972	0.0292402	0.0713837	0.10113	0.0323811	0.013202	0.171248	0.0599191	0.102461	-0.00199128	0.0523774
Q14181	0.0524207	-0.0174831	0.0252532	-0.0699757	0.037127	-0.0194343	0.0591568	0.0154572	-0.0314528	0.0257005	0.0102142	-0.0297439	-0.132529	0.11475	-0.03946
Q9Y2R4	-0.145429	0.031101	0.0597701	-0.03631	0.0632637	0.0278138	-0.150854	-0.00461467	0.0773288	0.0425046	0.054661	0.0222133	0.00418497	-0.102831	0.0571966
P35249	0.174051	0.044948	-0.0151971	-0.260428	-0.102334	-0.0885706	0.0132257	0.0555164	0.0968417	-0.00401236	0.241319	0.0691203	-0.129494	-0.0917287	-0.00325898
P83731	0.16818	0.575987	-0.0860309	-0.80283	0.25672	-0.0459142	-0.0643743	0.0154356	0.0292003	-0.0393441	0.107222	-0.333654	-0.135874	0.258341	0.0969371
P14866	0.179557	-0.759553	-0.387472	0.3361	-0.0360975	0.231238	-0.150612	0.101667	0.292932	0.328523	-0.526826	-0.0636874	0.374397	-0.255694	0.335527
P51636	0.0571563	-0.0519947	-0.0699262	0.0683311	-0.0548707	0.0475657	0.0373425	-0.002479	-0.0185918	0.0512904	0.0718795	0.0579385	-0.0745803	-0.113236	-0.00582568
Q9NYU2	0.00382028	-0.352946	-0.220091	0.4244	0.110035	0.23791	0.192324	-0.255398	-0.0723633	-0.155347	-0.0435651	0.0907476	0.0433567	-0.04417	0.0412876
Q9BUB7	-0.218146	-0.0515116	-0.0116898	0.0901455	-0.0893595	0.0265091	-0.0306661	0.0272342	-0.0303651	-0.00558484	0.14469	0.0738021	0.084516	-0.0616744	0.052101
O15066	0.044703	-0.0471825	0.0122208	-0.00572077	0.0366849	-0.00900649	0.00340762	0.00574238	0.0206988	-0.000332845	-0.0396581	-0.0120819	-0.0454652	0.062775	-0.0267846
Q13112	0.0495146	-0.0841927	0.0590879	0.0606602	0.0453582	-0.104382	0.0328191	-0.101684	-0.0987581	0.00901054	0.106673	0.0426813	0.0687414	-0.151476	0.065947
P62487	0.0122856	-0.000867671	0.0294315	0.137263	-0.0951513	-0.00133414	-0.00504066	0.0734673	-0.040782	-0.0766737	-0.104337	-0.059166	0.0895551	0.0381253	0.00322435
Q9Y5M8	-0.237905	-0.380613	-0.113422	0.0913697	-0.068809	0.139207	-0.0279621	0.221642	-0.065865	-0.0550258	0.415598	0.0847258	0.122608	-0.256175	0.130627
Q08426	0.0192265	0.106994	-0.0760247	0.03033	-0.054087	-0.0129029	0.0412988	0.0153579	0.0347809	0.0985765	0.0346973	-0.047996	0.00758135	-0.125972	-0.0718609
P98164	-0.0150595	-0.00832255	0.0652235	-0.0634106	0.0225083	0.0402735	0.112928	0.0695313	0.011542	0.0405504	0.0555283	-0.406262	-0.00488241	0.0747169	0.00513522
P19793	-0.107952	0.056108	0.0204257	-0.00856167	0.0167333	-0.00491255	-0.0219797	-0.0073274	-0.0199575	-0.0240678	-0.0251065	0.00713827	0.0263197	0.049818	0.0433221
O43324	0.0674383	-0.191832	0.0876172	-0.019965	0.0623214	0.00562015	-0.0156767	-0.00163465	-0.0740143	0.0734757	0.0563283	-0.0353149	0.0175052	0.01324	-0.0451086
Q03701	-0.0704841	-0.168203	0.0424907	-0.187212	-0.0862463	-0.031684	-0.0239132	0.0908139	0.0410906	-0.12809	0.241933	0.0725261	0.066856	-0.0515886	0.191711
P04179	0.120561	-0.0882915	0.159003	-0.0364107	-0.0169445	-0.343721	-0.300896	0.0667049	0.178039	0.0672684	-0.0483905	0.0226115	0.146676	-0.150806	0.224596
O00232	0.279941	0.0973325	0.270948	-0.324987	-0.0997679	-0.136636	-0.149505	-0.139617	0.0322945	-0.00573217	0.0410085	0.00887221	0.110704	0.183295	-0.168151
P40938	0.0973138	0.0856045	0.157919	-0.15473	-0.0384192	0.0723995	0.0440727	-0.0489228	-0.0408362	-0.0311527	0.0808879	-0.0588704	-0.0564023	0.15058	-0.259444
Q93050	-0.121982	-0.00389775	0.0184642	0.00340759	-0.0832798	-0.0406968	-0.000148466	0.0608336	0.0492285	-0.00624449	0.0706365	0.09953	-0.0165852	-0.0320903	0.00282485
P21964	0.13239	-0.0480796	-0.0364803	0.176615	0.177791	-0.0584851	-0.144405	0.00860559	-0.0798872	-0.0110928	-0.125042	-0.00517616	0.044344	-0.00871684	-0.0223804
P28074	-0.103016	0.146896	0.283789	-0.160196	-0.0520672	0.144242	0.089314	0.171717	0.0282574	0.12839	-0.00033007	-0.294868	-0.274768	0.0953122	-0.202673
O75150	-0.0769463	0.0411048	-0.0230566	-0.17314	-0.0840073	0.0214886	-0.0084587	0.101615	-0.00667198	0.0036684	0.203858	-0.0250119	-0.0787506	0.07203	0.0322784
P35269	0.0420437	0.153062	-0.0162478	-0.18524	0.0758804	-0.0453286	0.0150734	0.0604575	-0.0626313	0.0601313	-0.0740105	-0.0624771	-0.0961968	0.148001	-0.0125178
P38646	-0.607186	-1.18977	0.388361	0.770684	-0.492993	0.0635456	0.00941867	0.185324	0.197068	0.0461205	1.04616	0.0450729	0.0952938	-0.527422	-0.0296842
Q13442	0.0157015	0.00494593	0.120554	-0.284402	0.123292	0.0786635	0.0864474	0.00152029	0.0621078	0.0266598	-0.155592	-0.186406	0.0344095	0.227544	-0.155446
Q99623	-0.272892	-0.341992	0.230523	0.715511	-0.350801	-0.055365	-0.072131	0.00475082	-0.104312	-0.0379743	0.0635605	0.33985	0.466006	-0.468234	-0.116501
Q99798	-0.0754355	-0.38775	-0.00413549	0.60388	-0.145068	-0.0187535	0.0576166	-0.0675969	-0.196233	0.128858	0.0274854	0.138182	0.191476	-0.161173	-0.0913541
P54687	-0.0758423	0.158361	0.0572925	-0.042565	0.202379	-0.0128386	-0.204759	-0.0413312	0.0966321	-0.0331616	-0.181406	0.0613113	0.00126885	0.0728174	-0.0581585
O75844	-0.0641	-0.0243202	-0.220253	0.153738	-0.157266	0.091555	0.129183	0.114273	0.000187652	0.017653	0.0241074	0.0445009	0.184572	-0.260846	-0.0329843
Q96AC1	0.0589375	0.0828369	-0.0573013	-0.0727551	0.0556746	-0.0713126	-0.113125	-0.0538095	0.0520863	0.0380041	-0.0173323	-0.0369898	0.047683	0.0469274	0.0404755
P47914	-0.250743	0.173998	0.0349431	-0.239642	0.141614	0.0783089	0.0687732	0.0945603	0.154871	0.10125	-0.150415	-0.264684	-0.176732	0.0654332	0.168465
P26373	-0.0116712	0.612308	-0.00519714	-0.860113	0.334106	0.0623135	0.120293	0.101942	0.195186	0.101451	-0.111852	-0.562743	-0.391635	0.122072	0.29354
Q9C0E8	-0.11933	-0.0188009	-0.0953593	0.0689464	0.00164855	0.0293934	0.00737214	-0.0111585	-0.0585596	-0.0258593	-0.0011019	0.147272	0.0179314	-0.0272693	0.0848751
Q14139	0.102587	-0.0786645	0.0574937	0.0506413	0.0228081	-0.177502	0.0742528	-0.0765123	-0.0484536	0.0680309	0.083823	0.0035351	-0.0878646	0.104373	-0.0985476
Q2NL82	0.211082	0.220512	0.240707	-0.158936	-0.0590406	-0.23925	-0.106115	0.0034886	-0.014863	0.0243715	0.245864	-0.161296	-0.169672	0.143875	-0.180728
Q00796	0.116445	0.212975	0.0351156	-0.132498	0.183699	-0.036777	0.0144277	0.036032	0.114108	-0.109775	-0.178116	-0.0589663	-0.245293	0.0738205	-0.0251962
P38606	0.288128	0.280313	-0.186382	-0.127577	0.00134644	-0.20592	0.0286281	-0.0152829	-0.110622	-0.0455026	-0.163347	0.126038	0.359135	-0.0643978	-0.164557
P49756	0.0135112	0.0648519	-0.0142164	-0.194288	-0.125288	-0.00752022	-0.0569508	0.0139065	-0.0727605	0.00463951	0.0223341	0.33705	-0.0535294	-0.119115	0.187375
O75882	-0.0129631	0.0222722	-0.0697998	-0.009941	-0.060455	0.00340116	-0.066433	0.051049	0.015024	0.00110597	0.0727096	0.0727072	0.0200189	-0.0302668	-0.00842943
Q14BN4	-0.139523	0.0316957	-0.0567571	0.0123022	0.0114837	0.0381988	0.0227099	-0.0749742	-0.0913646	0.0645384	0.0343315	0.0857889	0.0567077	-0.0641452	0.0690073
P13489	-0.00272062	0.296216	0.103538	-0.434256	0.261336	0.097569	0.0880884	0.0270941	0.132816	0.0825244	-0.186619	-0.122135	-0.222217	0.0320804	-0.153315
Q00765	-0.356223	-0.274873	0.039369	0.271853	-0.015789	0.193069	0.175231	0.167004	0.17169	0.00805765	-0.0735142	-0.223973	-0.177228	0.036085	0.0592409
O15327	0.0220096	0.0583438	-0.00247733	-0.0709012	0.0501596	0.042769	0.0057913	-0.0169662	-0.049307	-0.0403512	-0.00919492	-0.00830026	-0.0184419	0.0533676	-0.016501
Q9UBC2	0.132894	0.108539	-0.119503	-0.172925	0.113898	-0.103611	-0.115292	-0.0842665	0.0211971	0.0635609	-0.00720616	0.103476	0.029254	-0.0303907	0.0603752
P11021	-0.939099	-1.50563	-0.524246	1.2248	-0.874035	0.0889709	0.595586	0.762315	0.438141	0.330682	0.132162	0.568883	0.385853	-0.676142	-0.00823878
Q9UBU9	0.124803	-0.145896	-0.0300391	0.197453	-0.102003	-0.0200545	-0.0712593	-0.00540009	-0.0842225	-0.0494093	0.282315	0.153201	-0.0735509	-0.204907	0.0289688
Q15459	-0.393042	-0.179929	-0.136452	0.332888	-0.0491968	0.071004	-0.198075	-0.026082	-0.263797	0.142246	0.148915	0.226426	0.237277	-0.167843	0.255661
Q6P9B6	0.174813	0.0534367	0.186117	0.0767262	-0.0202625	-0.172979	0.00271189	-0.0215183	-0.170433	-0.29748	-0.00434771	-0.0587832	0.0333362	0.220294	-0.00163146
P04080	0.0321484	0.253271	-0.142535	-0.0565885	0.249392	0.00318071	-0.0482655	0.037873	0.0224121	0.040904	-0.151094	0.0254614	-0.252939	0.0117046	-0.0249265
O94973	0.177691	-0.121551	-0.187934	0.0139745	0.0426808	-0.0803064	-0.119065	-0.0305234	0.0131965	0.0434605	-0.126152	-0.0667092	0.0322233	0.149444	0.25957
P27797	-0.551827	-0.995625	-0.0696474	1.46195	-0.279107	0.0886537	0.0490703	0.0950925	0.242092	0.411315	-0.25471	0.123916	0.177757	-0.445182	-0.0537494
P23368	-0.0821489	-0.124556	0.128079	0.0466608	-0.345685	0.0289106	-0.0281819	0.0638921	-0.0130704	0.0126642	0.064115	0.155362	0.202355	-0.221694	0.113298
P24666	0.0261298	0.201762	-0.0298074	-0.130043	0.257071	-0.0219499	-0.0200526	0.0126998	-0.0991112	0.0492877	-0.221831	0.0547725	-0.112075	0.0944178	-0.0612702
P34931	0.0322666	0.093635	0.0961949	-0.0511193	0.0591771	-0.0375657	-0.0446191	-0.0603901	-0.0259231	0.0667236	-0.00513049	-0.0388696	0.00262283	-0.0406566	-0.046346
P16401	-0.765011	-0.607606	-0.456565	2.251	-0.898661	0.696934	0.524348	0.738475	-0.123321	-0.200041	-1.34437	-0.110687	0.508435	-0.188351	-0.0245697
P31946	-0.190528	0.279881	0.133153	-0.390006	0.329437	0.0947065	0.156142	0.134117	0.270889	0.147096	-0.218624	-0.61125	-0.398103	0.31793	-0.0548398
P63104	0.0767448	0.962375	0.050673	-0.865531	0.568101	0.174147	0.169296	0.283851	0.0719454	-0.0505801	-0.48911	-0.75741	-0.534203	0.433468	-0.0937666
P27348	0.0907258	0.46509	0.0499202	-0.336111	0.202778	0.155631	0.103063	0.110252	0.0777099	0.0442613	-0.320506	-0.572263	-0.287599	0.217237	-0.000188898
Q9Y324	-0.0482092	0.020162	0.0246573	0.067632	-0.0964868	0.0354985	0.051282	0.082444	0.0904157	0.0672688	-0.130197	-0.0827278	-0.0181079	0.03065	-0.0942816
O75874	0.160174	0.530748	-0.358258	-0.258035	0.0884795	-0.0605308	0.0148636	-0.00575306	-0.0549555	0.00808889	-0.264688	0.0173469	0.0241231	0.225948	-0.0675518
Q15185	0.116759	0.422323	-0.0183236	-0.164813	0.254936	-0.133379	-0.177041	-0.189416	0.265035	0.264019	-0.248741	-0.269067	-0.225948	0.366488	-0.262831
P02774	-0.0305354	-0.0564399	0.103553	-0.0563943	-0.0425385	0.0352004	0.0518402	0.041088	0.0181429	0.0464936	-0.0390493	-0.0320044	-0.0484146	-0.0358927	0.0449513
P62888	-0.0535783	0.329376	0.208912	-0.392148	0.12791	0.210715	0.0252724	0.0451939	-0.0479245	0.0346318	-0.106826	-0.483391	-0.291264	0.33485	0.0582707
Q02818	0.0241371	-0.333207	-0.0118114	0.59	-0.0740818	-0.0585844	-0.0763733	-0.0121727	-0.0088016	0.000708454	-0.111019	0.0850604	0.168913	-0.0873612	-0.0954057
O60313	-0.0212815	-0.212874	-0.0770877	0.082608	-0.211641	-0.0877528	0.0772906	0.0342034	0.115614	-0.0796309	0.204833	0.216554	0.0312592	-0.0756341	0.00353942
Q86SF2	-0.0306365	-0.0866029	-0.0697724	0.186392	-0.182254	0.0740409	-0.00968498	0.0193052	-0.00944994	0.122823	-0.153393	0.0704198	0.072659	0.0680141	-0.0718607
P16422	-0.190766	-0.350171	0.0836962	0.409897	-0.0681225	0.0372656	0.0953023	0.104753	0.105157	0.0108323	0.148027	-0.0611532	-0.137228	-0.164506	-0.0229827
Q8IY95	-0.164054	0.0025666	-0.0208451	0.0604272	0.0261908	0.059954	0.0232538	-0.154662	0.0335796	0.0264142	-0.0463698	0.0967715	0.0936097	-0.0313826	-0.00545465
P40855	0.0717584	0.0926081	0.0651893	-0.00444782	-0.0428629	-0.000620232	0.0129983	-0.0619675	0.0194247	-0.0233555	-0.082535	-0.018561	-0.0449679	0.00984015	0.00749898
P00367	-0.128338	-0.157144	-0.103033	0.430563	-0.219316	-0.0772905	0.0370443	-0.0216094	0.0659547	0.0618109	-0.163841	0.199786	0.174675	-0.108629	0.00936706
Q9NT62	-0.0267167	0.119661	-0.0830177	-0.0953388	0.0455953	0.0324802	-0.0434814	0.0166984	0.0104297	0.0733221	-0.111874	-0.0291119	-0.0346509	0.102282	0.023723
Q10713	-0.327319	-0.471604	0.0794204	-0.0707623	-0.129444	0.0668903	-0.0155768	0.176712	0.190566	0.202921	0.30339	0.124552	0.0279991	-0.136226	-0.0215189
Q07065	-0.223827	-0.253009	-0.283104	0.244998	0.163199	0.0950994	0.278062	-0.0112549	0.0703452	0.15838	-0.0404445	-0.221252	-0.0398452	0.029153	0.0334993
P27635	0.073539	0.414735	-0.0861409	-0.273951	0.0855251	0.0410178	-0.0618923	0.0616183	-0.0381295	0.0365392	-0.123903	-0.140569	-0.121912	0.120859	0.012665
Q9Y5K6	0.0590741	0.272237	-0.0293508	-0.163496	0.0340083	-0.00710032	0.119361	-0.0670588	-0.0297448	-0.0177251	-0.154171	0.00993408	0.041653	-0.022642	-0.0449786
P05362	0.136788	-0.077589	-0.0686852	0.203436	-0.0272704	0.037606	-0.0679072	0.0469657	-0.0985403	0.0847847	-0.108207	0.0742004	0.110934	-0.336411	0.0898945
O75521	-0.0831856	-0.0159318	-0.0708975	0.352149	-0.00874374	0.00745606	0.0319995	-0.0472801	-0.087804	0.0285476	-0.0445498	0.134651	-0.0464793	-0.0519293	-0.0980025
Q9H9B4	0.0368043	-0.384896	0.105048	0.352869	-0.259246	0.0950843	0.00939296	-0.131874	-0.180475	-0.106149	0.405186	0.180593	0.204849	-0.11292	-0.214266
Q9UMX5	0.0091242	-0.0721172	-0.174991	0.181565	-0.11435	0.0444796	0.0375837	0.0431711	0.0746769	-0.0298489	0.0426981	0.0628344	0.207508	-0.19915	-0.113183
P39019	-0.351389	0.116618	0.30499	-0.222242	0.280351	0.202728	0.217599	0.311046	0.252465	0.0672482	-0.0708196	-0.888104	-0.290749	-0.0383704	0.108631
O15511	0.1986	0.105604	0.0202882	-0.177743	-0.124044	0.00866247	0.0291526	0.0692444	-0.0407219	0.0643056	-0.0125012	-0.0110271	0.105177	-0.0429425	-0.192054
Q01650	-0.257057	-0.44583	0.16075	-0.159638	0.175174	0.0877977	0.119242	0.196109	0.0947533	-0.109972	0.33381	-0.208478	-0.253091	-0.0799308	0.346359
Q96GK7	-0.0265257	0.0302719	0.0208746	0.103187	0.00544033	0.0288635	-0.0225714	-0.0626916	0.0195639	0.0518192	-0.00183606	0.0411191	-0.0178056	-0.0984812	-0.0712277
Q9HAV7	-0.173353	-0.310921	0.175966	0.028757	-0.141209	0.0599884	0.131256	0.0842252	0.121985	0.0509684	0.257062	-0.0210542	-0.0945082	-0.157937	-0.0112243
P52888	0.0485791	-0.0976549	0.0729758	-0.0166743	0.0920419	0.00136466	0.0479973	0.0619171	0.0672046	0.0655358	-0.128203	-0.138208	0.00492954	0.02393	-0.105735
O75923	-0.126376	-0.172835	0.127127	0.0124904	-0.160683	0.0324684	0.0860488	0.00032657	-0.0444028	0.00440467	0.264198	0.177549	0.0397122	-0.130867	-0.109162
Q9BQE5	-0.0671829	-0.0216445	-0.00168606	0.0662497	0.0416116	-0.0277127	0.0961423	0.0349729	0.0492224	-0.146627	0.0164266	-0.101357	-0.000473871	-0.0145943	0.0766526
P61225	0.0537425	0.0926972	-0.0584284	0.142084	-0.0131742	-0.0174753	-0.0142896	-0.0421718	0.00472346	-0.0204814	-0.204894	0.0422149	0.0173043	0.000784821	0.0173629
Q15382	0.0396724	0.0432178	-0.0585114	-0.0510914	0.0011888	0.0179229	0.0111786	0.0493387	0.0114442	0.0312858	-0.0891572	-0.034542	0.032955	0.0116072	-0.0165094
O15213	0.0603265	-0.0479258	0.0706304	-0.147833	-0.0457654	0.0294805	0.00567666	-0.00107777	-0.0195327	0.0309447	0.117641	0.142196	-0.125428	-0.027161	-0.0421712
Q8WVX9	0.0238285	-0.197104	-0.162228	0.0178078	-0.264662	-0.0141573	0.0815611	0.110328	0.169839	0.153858	0.00329249	0.138064	-0.0220596	-0.016939	-0.021429
Q4G176	0.0101698	-0.102992	0.0177472	0.0876767	0.0188407	-0.054365	0.10899	-0.00963559	-0.0776439	0.00214009	0.0470861	-0.0808023	-0.0511828	0.04997	0.0340012
Q8WXA9	-0.0105857	0.0171192	0.00847568	0.0611552	-0.00119963	0.0109669	0.00759515	-0.0027876	0.0481733	0.0370885	0.0413137	-0.063101	-0.0993551	-0.00698581	-0.0478728
Q6PL18	0.166854	0.132742	-0.0359903	-0.21116	-0.0559528	-0.0104819	-0.153928	-0.0449964	-0.129642	-0.00264256	0.0508425	0.17587	-0.00917321	0.110081	0.0175774
Q8TCG1	0.0179487	0.0223734	0.00131473	0.086697	0.012551	-0.0328746	-0.0427375	-0.0181558	-0.0259427	-0.0934931	-0.0475438	-0.066498	0.018551	0.0375906	0.130219
P12268	-0.00268287	0.404854	-0.000598275	-0.444282	0.12528	0.0629773	0.146484	0.0115997	0.0531202	0.000741161	0.0991487	-0.350285	-0.0408477	0.241737	-0.307246
Q96PU4	-0.0947676	0.0158229	0.0589813	0.0936188	-0.0194191	-0.0253865	0.0425299	-0.0154937	-0.0829221	0.0795744	-0.0677733	0.0227496	0.0932376	-0.157324	0.0565714
Q96T88	0.026122	0.159649	-0.119527	0.134904	-0.0520792	0.0728241	0.0167169	0.128898	-0.104478	-0.109411	0.188686	0.179199	-0.0635049	-0.221275	-0.236724
Q96A65	0.00536335	-0.149049	0.0780901	0.20369	0.221192	-0.135635	-0.149152	0.0100406	0.165303	-0.0422553	-0.136615	-0.0725191	-0.0330403	0.127875	-0.0932879
Q9NZ43	-0.0441396	0.0141926	0.0150373	0.00512702	0.0512988	0.0401746	0.0396837	-0.0381555	0.0231486	0.0397159	-0.0620508	0.0448349	-0.0015757	-0.0644257	-0.0628661
Q8NEW0	-0.0799947	-0.107485	-0.21149	0.103446	-0.166893	0.130338	0.0216098	0.096529	0.150183	0.0597214	0.028545	0.059581	-0.0704121	0.0162244	-0.0299021
Q8NBS9	-0.238501	-0.352631	0.0879716	0.418248	-0.171504	-0.0482765	0.139896	0.161905	0.109485	0.0028364	-0.0312897	0.207096	0.0664422	-0.0175952	-0.334083
Q8WU76	0.00216766	-0.0125258	0.520254	-0.00744646	-0.113507	-0.0564917	-0.0664257	-0.0438765	-0.0812255	-0.0604036	0.00523161	0.0263289	-0.0259084	-0.0724259	-0.013746
P20933	0.0697808	-0.0162065	-0.134024	-0.0100718	0.0613551	-0.0286413	-0.0372361	0.0150943	-0.03042	0.0212253	-0.0952913	0.110613	0.101526	-0.00806042	-0.0196435
Q16763	-0.13935	0.128633	0.111675	-0.185737	-0.00138575	0.0458254	-0.01325	0.0104746	-0.0419773	-0.0454419	0.0025221	-0.061575	-0.0109097	0.212164	-0.0116676
Q6DD88	0.135156	-0.252837	-0.0443746	0.299025	0.00384543	-0.0936449	-0.0268119	-0.0394457	-0.021382	-0.100925	-0.104655	0.299884	0.123077	-0.167209	-0.0097017
Q8N490	0.0301303	-0.0553843	-0.0716706	0.102402	-0.0608872	-0.0117207	-0.0113173	-0.0165524	-0.00844647	0.0494827	0.108744	0.0108793	0.00914202	-0.0611886	-0.0136123
Q9BPX5	0.134401	0.137922	0.0346288	-0.0606524	-0.249691	-0.0150849	0.00322413	-0.00435311	-0.0403491	0.0313823	-0.0684756	0.103182	0.11411	0.0447086	-0.164953
Q9NPD3	-0.137366	-0.207534	0.0449309	0.174994	-0.156327	-0.0406526	0.00522969	0.158075	0.154519	0.0921952	-0.0064041	-0.00666592	0.0227056	-0.110631	0.0129315
Q9GZX9	-0.177592	-0.0565421	-0.0973198	0.0280988	-0.0487063	0.0631954	0.110117	0.118165	-0.00195242	0.0180113	0.00556414	0.0160875	0.0423269	-0.0423857	0.0229313
Q8N0U8	0.190434	-0.036418	-0.0142589	0.103733	-0.211231	-0.0543745	-0.027716	-0.12859	-0.0742469	-0.0116216	0.00205338	0.209117	0.156935	-0.0942322	-0.00958377
P49589	0.0165308	0.136416	0.0365024	-0.217318	0.0966285	-0.100436	0.00907637	0.117732	0.049088	0.0620578	0.141444	-0.0912177	-0.156322	0.100418	-0.2006
Q9BQB6	0.000799177	-0.0796416	-0.133556	0.113476	-0.0950756	0.0099536	-0.0286463	-0.00507639	0.109262	0.0466809	0.0930616	-0.0623473	-0.0178847	0.0150898	0.033905
Q8IY18	0.0047471	0.0380178	0.04854	-0.0146616	-0.0305541	-0.0609554	-0.00629613	0.00223313	-0.125082	0.00164845	0.212255	-0.0442922	-0.0098669	0.0406388	-0.056372
Q96HR9	-0.0389531	-0.0459864	-0.00947291	0.0855136	-0.0123488	-0.0121568	-0.00417423	-0.0180232	0.045255	0.00132204	-0.0577112	-0.0421881	-0.0318397	0.0737533	0.0670106
O94776	0.137935	-0.222232	0.0923031	0.151409	-0.486484	-0.0154843	0.0201597	0.190071	0.163413	0.135423	0.0312438	0.0739056	0.0269797	-0.25151	-0.0471336
O60831	-0.0150903	-0.0779606	-0.0851151	0.0398701	0.000221369	-0.0812055	0.0927081	0.0234858	0.0179594	0.0028455	-0.0155694	0.0808866	0.0416484	-0.0747902	0.0501058
Q9Y3B8	-0.217052	0.13272	0.0371973	0.0241714	-0.0286138	0.0299981	0.0269523	0.0947012	0.0528768	0.0810732	-0.0635845	-0.219954	0.155454	-0.0676315	-0.0383073
P53621	0.289529	0.541289	0.182685	-0.566556	0.222897	-0.105203	0.159914	-0.078708	-0.244947	-0.0220283	-0.0461493	-0.429982	-0.0482259	0.227816	-0.0823288
Q06210	-0.0355647	0.222592	0.0526907	-0.31683	0.165854	-0.0335893	0.106763	0.0488703	-0.0117268	0.123748	-0.161048	0.075896	-0.138389	-0.0247824	-0.0744853
Q13247	-0.156846	-0.0941991	-0.0542722	0.218377	-0.047925	0.135468	0.105154	0.0311003	0.244999	0.0278457	-0.220181	-0.276683	0.101763	-0.128145	0.113543
P28482	-0.121194	0.236802	-0.000961753	-0.137252	0.113973	0.151661	-0.00154257	0.0734847	0.134601	-0.183275	-0.21301	-0.0415547	-0.00672262	0.0575793	-0.0625892
Q9NZ08	0.101632	-0.00617584	0.0889886	0.190228	-0.00638731	-0.12923	-0.0981845	-0.0478386	-0.1999	0.00105608	-0.119155	0.12966	0.0128569	0.0908173	-0.00836755
Q49A26	0.0352265	-0.0334657	0.0239995	0.120157	-0.0951579	-0.0744793	-0.118337	-0.0273762	-0.148854	0.0548234	0.0572624	0.121723	0.111008	-0.0183582	-0.0081717
Q8NCG7	0.0621907	-0.0736096	-0.0226546	0.036412	-0.0174254	0.0305733	-0.0267363	-0.027881	-0.0750376	0.00342901	0.0213972	0.0353001	0.0332458	0.0420308	-0.0212346
Q9HCD5	-0.039325	-0.0204896	0.222651	-0.085231	-0.00158699	0.0163364	0.036579	0.0882098	-0.0728593	-0.216555	0.316028	-0.0818968	0.00970044	-0.133579	-0.0379819
P01137	0.0354324	0.00870586	-0.0126091	0.0666154	-0.292069	0.0305127	0.00990508	0.00937029	-0.00692145	0.0354721	0.00785798	0.0872865	0.0310142	-0.0415801	0.0310075
Q6NUQ4	-0.0260284	-0.0988475	-0.192407	-0.0167198	-0.0946521	-0.0475554	-0.0232864	0.0266875	0.0310692	0.0459662	0.175472	0.052713	0.100979	0.0523775	0.0142322
P22061	-0.044285	0.132541	0.169377	-0.10933	-0.00609707	0.0484574	0.00138206	0.0482133	0.0452603	0.0637234	-0.159098	-0.166751	-0.219438	0.116034	0.0800128
P19784	-0.0787216	-0.0225124	0.0565613	-0.00265805	0.00621984	0.099397	-0.0280383	0.0559813	0.154714	-0.0234089	0.0318905	0.00263941	-0.107485	-0.0688332	-0.0757456
P49137	0.059143	-0.118542	0.094658	0.053244	-0.0320133	-0.0189325	-0.024859	-0.0389013	-0.0105044	-0.0189785	0.196895	0.0243235	-0.0166361	-0.114696	-0.0342005
Q16352	-0.142839	0.186026	-0.0452243	-0.0787587	-0.0550503	0.0663143	0.0375307	0.160182	-0.0664473	-0.0546524	-0.0795579	0.0405448	-0.00705702	-0.067485	0.106474
Q96GW9	-0.00791898	0.014101	0.0540551	0.0796956	-0.018681	0.00200207	-0.0308485	-0.109403	-0.000151218	-0.0114728	0.00656669	0.134186	-0.0406544	0.0672768	-0.138754
Q86Z20	-0.0124355	-0.0427191	0.0230947	-0.192848	0.0163027	0.028015	0.00422191	0.0125176	-0.00300075	-0.0184441	0.0106703	0.0175007	0.0639348	0.0421986	0.0509908
Q6IN85	0.160293	-0.0235664	0.0125343	-0.094209	-0.0297348	0.0453592	-0.0139032	-0.00191373	-0.0439533	0.0606527	0.111943	-0.0224723	-0.0587141	0.0116723	-0.113988
P17655	-0.0687225	0.357055	-0.0267027	-0.579736	0.390551	0.0886061	0.025295	0.0978751	-0.0248488	0.127716	-0.327051	-0.0183027	-0.0674651	0.0682313	-0.0425004
O95347	0.050711	0.428176	0.132056	-0.32673	0.0694965	-0.064219	0.102401	0.0756117	0.13704	-0.062895	0.0412016	-0.180039	-0.266781	0.15688	-0.29291
Q8N3X1	-0.00913988	0.00302482	-0.00880552	0.128134	-0.0220423	-0.0434915	-0.0341294	0.0164398	-0.0328108	-0.0405837	-0.0675516	0.0972347	0.0976897	-0.0513715	-0.0325967
P42166	0.219345	0.520524	-0.247313	-0.406003	0.0464101	-0.122781	-0.118882	-0.135597	0.0611991	0.237915	-0.142943	0.188613	-0.359148	0.235215	0.0234448
P42695	0.0874539	-0.000884711	-0.0116872	-0.141851	0.023703	-0.0247016	-0.0520889	-0.0947469	0.0040836	0.0207748	0.0263111	-0.00836784	-0.0465971	0.099279	0.11932
Q16881	0.0502357	0.195565	0.168073	-0.360808	0.153235	-0.0236206	0.0652553	-0.0276317	0.00848935	-0.110935	-0.0493757	-0.151213	0.0495152	-0.0745535	0.107769
P17812	-0.107864	0.0307183	-0.20961	-0.277161	0.339985	0.247434	0.129203	-0.188596	-0.0673167	0.138757	0.131927	-0.247056	0.144006	0.222043	-0.286469
P16144	-0.0489098	-0.251288	0.125531	-0.0171773	-0.255868	0.0535058	-0.0769036	-0.0374933	-0.0229387	-0.04043	0.466303	0.0534331	0.0547869	-0.169994	0.167444
O75400	0.0189835	-0.220888	0.0218232	0.366487	-0.079188	-0.141996	-0.0797027	0.0277782	-0.117226	-0.0812204	0.0320614	0.150208	0.0670248	-0.0796283	0.115484
P43246	0.303579	0.27814	0.155113	-0.225376	0.0967756	-0.00508081	-0.0300403	0.00204177	-0.0847423	-0.0894564	-0.0831951	-0.290894	-0.196869	0.305764	-0.135759
Q7L014	-0.00224062	-0.0880179	-0.0905048	0.0264074	-0.311355	-0.10228	-0.0565623	0.0619829	-0.140368	-0.20242	0.379065	0.091858	0.266454	0.473584	-0.305602
Q9BSH4	-0.129496	-0.270737	0.0204573	0.139984	-0.0338863	0.0371705	0.121189	0.0453561	0.0668646	-0.0661291	0.0527492	0.0208364	0.129509	-0.119524	-0.014344
P50748	0.05784	0.0856168	0.0395187	0.02279	-0.0385206	0.0266911	-0.0658221	-0.0838648	-0.0430072	-0.0109185	-0.0426536	0.0142334	0.0601875	-0.032857	0.0107662
Q9P2D3	0.0699923	0.00283609	0.08805	-0.0362011	-0.0108367	-0.0126719	-0.0129617	-0.0545545	-0.00950662	-0.0181319	0.0273926	-0.0731254	0.0271777	-0.0155081	0.0280492
O43678	-0.177994	-0.00506126	-0.224603	-0.0381048	-0.0218672	0.163774	0.0770608	0.136034	0.0942853	-0.140994	0.22978	-0.0891446	-0.115884	-0.0114808	0.1242
Q9BXY0	-0.0249624	-0.103766	0.0231141	0.0631952	-0.0364032	-0.121247	0.0125527	0.0465247	0.0158918	0.00176015	0.102421	0.058454	0.0234198	0.0468741	-0.107828
Q9Y2Z0	0.0959482	0.185919	0.047905	-0.190468	0.164632	0.0238906	-0.00359628	-0.142039	0.00940531	0.0354171	0.0152307	-0.157442	-0.125937	0.195987	-0.154854
Q9NR45	0.113821	0.344931	-0.117766	-0.180293	-0.0844539	0.0638208	0.0406207	-0.0400616	-0.0470795	0.0825423	0.0352401	-0.155721	-0.00252754	0.0220146	-0.0750882
Q9BQP7	0.00277317	0.0834757	0.00825844	0.291105	0.012172	-0.00568111	-0.0446353	0.00500192	-0.306978	-0.197515	0.0341952	0.0815272	0.091659	-0.0846304	0.0292723
Q96AQ6	-0.12717	-0.137427	-0.107964	0.229664	0.0538817	0.0192126	0.0796417	0.0751774	0.100118	-0.0722105	0.00820774	0.0606949	-0.0519135	-0.0476243	-0.0822876
P46940	0.208928	0.56714	0.0706232	-0.176487	0.207515	-0.214518	-0.330457	-0.348577	-0.412444	-0.062381	-0.0615274	-0.36963	0.16512	0.894209	-0.137515
O95479	0.144892	-0.219435	-0.195502	0.0027119	0.038813	0.0413695	0.0278896	0.0196157	0.0264572	0.0387811	0.128976	0.0378777	-0.163566	0.042245	0.0288753
Q9Y265	-0.0107028	-0.254288	0.196468	-0.291223	-0.0581286	-0.123541	0.0116462	0.0265931	0.0207329	-0.0236982	0.625019	-0.05199	-0.0143295	0.0356749	-0.0882331
Q9BVI4	0.0196329	-0.0574048	0.192665	0.0743985	0.0282936	0.0459276	-0.111725	-0.121517	-0.000396178	-0.0251112	0.116872	0.107365	0.0051776	-0.212365	-0.0618127
P43897	0.0168708	-0.182588	0.0214065	0.176608	0.000360296	0.0223085	-0.0834777	-0.071554	0.0512509	0.0371837	0.0688802	0.0441159	0.0574293	-0.0825372	-0.0762573
O43809	-0.10127	-0.125946	0.0364268	0.319463	-0.162122	0.107493	0.155821	0.0655545	0.112914	0.0205429	0.00166947	-0.0233043	-0.0697712	-0.3331	-0.00437109
P46108	-0.0590883	0.0534999	0.259846	-0.000797395	0.0368744	-0.0751189	-0.0714985	0.0354603	-0.150694	0.012239	-0.00158484	-0.153541	0.00640298	0.113267	-0.00526716
Q9H857	0.04491	-0.0120936	0.0832521	0.0212464	-0.0851554	0.0323574	-0.0613279	-0.0218221	0.0110769	-0.0466806	0.0181322	-0.150444	0.0780686	0.0131535	0.0753265
O43264	0.085841	-0.0762764	-0.0773564	-0.0625475	0.0121784	-0.150616	-0.00513395	-0.0815074	-0.067968	0.00152984	0.164415	0.0860254	0.0583052	0.101434	0.0116779
Q6IQ49	-0.0274811	-0.0221911	-0.0370894	0.00376545	0.00417243	-0.00195783	0.00368213	0.0525292	-0.00997989	-0.02883	0.0107694	-0.0609161	-0.0348063	0.0328029	0.11553
P54727	0.127402	0.261048	0.180357	-0.312617	0.14424	-0.0497847	-0.00509573	0.0597731	0.0557292	0.0528304	-0.134009	-0.263891	-0.112141	0.198485	-0.202327
Q8NFF5	0.165206	-0.0409151	0.00417023	0.0482833	-0.120117	0.00752539	0.0146109	0.0136929	0.0280459	-0.0309094	-0.120381	0.0383441	0.0378451	0.0125297	-0.0579305
Q8NI36	-0.0458175	-0.0883398	-0.0449321	0.0882005	-0.191299	-0.0994781	-0.0497491	0.0617573	-0.160194	-0.0148057	0.197366	0.292713	0.267708	-0.136758	-0.0763695
Q5TC12	-0.0589043	-0.0505912	0.0646473	0.0892561	-0.00413297	-0.00342665	-0.0114922	0.0462045	-0.0539507	-0.00728962	0.0759593	0.093566	0.0152021	-0.127755	-0.0672925
O43615	-0.0857807	-0.313199	0.22778	0.229918	-0.197566	-0.0652528	-0.0251505	-0.0444637	-0.0727297	-0.0902727	0.392862	0.0868512	0.071892	-0.0837967	-0.0310914
Q15646	0.00880111	-0.0252073	-0.0304076	0.042722	-0.0627275	0.0455256	0.0391922	0.0435936	0.00988549	-0.0262363	-0.0617548	0.0319092	-0.00231517	0.0210695	-0.03405
Q8WUP2	-0.0771582	0.0779624	-0.0199566	-0.136629	0.118014	-0.00454579	0.0426682	-0.00458014	0.0388949	-0.0376513	0.0450825	-0.0275884	-0.0828902	-0.014318	0.0826955
Q15942	-0.106949	0.190225	-0.0799783	-0.357788	0.202447	0.0255902	-0.00953518	-0.0568992	-0.0586419	0.0373467	0.114069	-0.167465	-0.0600827	0.211763	0.115899
P27695	0.0660418	0.341251	0.0859615	-0.337203	0.124556	0.00825658	0.0717157	0.121413	0.0140978	0.0746272	-0.174404	-0.229795	-0.314192	0.390877	-0.243203
P42785	0.0659129	0.0290808	0.00119959	0.0705631	-0.0838868	-0.0113663	-0.0680791	-0.116476	-0.0182404	-0.00241617	-0.0490465	0.0336264	0.103261	0.0724382	-0.0265705
Q9UBB6	0.0141595	-0.0137193	0.00553878	-0.100492	0.100041	-0.0370153	-0.0200924	-0.0274619	-0.0199118	-0.0381733	0.00637384	-0.000880624	0.0221745	0.0459165	0.063543
Q9GZQ8	0.0405852	-0.020133	0.0529163	-0.0106344	0.000196382	0.0234635	-0.00229659	-0.0297173	0.0392393	0.00621251	0.058666	0.0269972	-0.11912	-0.0206984	-0.0456771
P26572	0.0258021	-0.0263508	0.0428328	0.116564	-0.055069	-0.0503798	-0.0804565	-0.0851884	-0.0500306	-0.0106769	0.133964	-0.0582194	0.104455	-0.0848938	0.0776472
O15533	0.0383932	-0.139238	-0.15605	0.209977	-0.0155897	0.0375508	0.0164161	0.00769856	0.0722654	0.13888	-0.194982	-0.0451857	0.111482	-0.0389927	-0.0426243
Q969S3	0.085031	-0.00235977	0.0185828	0.00390182	0.0182019	-0.0570462	0.0165403	0.0205137	0.0143555	0.00610026	0.0197413	-0.117178	-0.0484416	-0.00638545	0.0284419
Q9HC38	0.0375695	0.181722	-0.0163894	-0.172471	0.178426	-0.0797736	-0.00470189	-0.0306628	-0.132722	0.012883	-0.0451554	-0.0733994	-0.0925867	0.203411	0.0338509
Q8IWT6	0.14557	-0.0413715	-0.0592782	-0.0219398	-0.0495002	0.0456942	-0.00321866	-0.0774031	-0.0281757	0.0363885	0.103688	0.0616795	-0.065857	-0.0458818	-0.000394588
Q86W92	-0.0120782	0.0525914	0.0519366	0.00835709	0.0466122	-0.0224964	-0.0227382	-0.00775777	0.010931	-0.00528973	-0.0245901	-0.0367978	0.0123517	-0.0518283	0.000796529
O14579	0.115946	0.262402	0.109688	-0.136759	0.167153	0.0913689	-0.100748	-0.042594	-0.0756963	-0.0700867	-0.069822	-0.0633465	-0.0262718	-0.0835446	-0.0776876
Q16401	0.0862582	0.233064	0.0829204	-0.27463	0.094142	-0.0483445	-0.114061	-0.018451	-0.0345678	0.041645	-0.0416545	0.0413443	-0.203269	0.139834	0.0157694
Q70J99	0.0633086	0.13795	-0.00392001	0.00862792	-0.0941623	0.0676231	0.024636	-0.00216114	0.0904647	-0.0553387	-0.0178911	-0.0217775	-0.0524183	-0.0885096	-0.0564311
Q9P2R7	-0.0295825	-0.549837	-0.149464	0.315754	-0.241262	0.118781	0.0373232	0.125434	-0.0246821	-0.0804127	0.17852	0.123082	0.134141	-0.0960148	0.13822
Q92530	-0.0113482	0.119962	0.0991718	-0.115162	0.0639362	0.045075	-0.140821	-0.0718023	0.0412291	0.0265487	-0.189635	0.0276344	-0.0880356	0.106962	0.0862849
O75608	-0.241255	-0.106803	0.0721253	0.0767381	-0.115082	-0.00211663	0.00416229	-0.0462155	0.0149356	0.00906737	0.0525691	0.125472	0.126248	0.0668263	-0.0366715
Q9Y5X3	0.0507215	0.104699	0.0260039	-0.155267	0.0792554	0.00997456	0.0799173	-0.0574687	0.0361425	0.0442531	-0.139128	0.0251949	0.0555864	-0.00348486	-0.156401
Q8IZP0	-0.0398786	-0.161227	0.0041397	0.0603604	0.0670628	0.000215683	0.0271498	0.0107825	-0.0886057	0.0744601	0.0480983	-0.123847	0.0567573	-0.00378957	0.0683217
Q9H3P2	0.0307213	0.0849206	-0.00770126	0.146646	0.0678016	-0.0170326	-0.0114119	-0.0983345	-0.0571257	0.039126	-0.0666673	-0.00651757	-0.00472395	0.0328997	-0.132601
Q9ULK4	0.112075	-0.0398118	-0.00142176	0.0677386	-0.0852339	-0.102722	-0.0459686	0.0160788	-0.0889953	-0.0859257	0.0727007	0.11254	-0.0325268	-0.0212968	0.122768
Q68BL7	-0.0162277	-0.0443545	-0.007568	0.00441087	-0.003373	0.0416622	-0.0104751	-0.00176877	0.030157	0.00678679	-0.0334695	0.0339281	-0.0178184	-0.0140116	0.0321216
Q9NXX6	-0.0223078	0.0271271	0.0238326	-0.00276398	-0.0148812	0.0767674	0.0285507	0.0826312	0.042345	-0.0152301	-0.0680352	-0.0508689	-0.119701	-0.000272338	0.012807
Q9HC21	-0.00872197	-0.046117	0.0289853	0.0285006	-0.0982936	0.0617539	0.0239135	0.0137407	-0.0288881	-0.00927972	0.0628233	0.068262	0.0319737	-0.0511936	-0.077459
Q8N2F6	0.0354618	0.0989083	-0.103945	0.0246675	-0.102651	-0.0918831	-0.0734183	0.00182682	0.0332393	0.0325534	0.107556	-0.042036	0.0610454	0.0882605	-0.0695863
Q6P1L8	0.0410458	-0.183177	-0.0455852	0.00525609	-0.000247011	-0.00479331	0.0823614	-0.0387987	0.0653536	0.113217	-0.0112757	0.0941935	0.0594397	-0.197135	0.020144
Q9UH62	-0.0278452	-0.13824	0.0453325	-0.041745	-0.100453	-0.111521	-0.139985	0.00252091	-0.119214	0.0587609	0.224505	0.281841	0.053793	-0.085273	0.0975242
Q05519	-0.00108893	-0.177346	0.00913202	0.492194	-0.303531	-0.0804437	-0.0795025	-0.0741226	-0.0700643	-0.15239	0.043121	0.459748	0.176342	-0.104409	-0.137639
P19388	-0.09303	0.00276382	-0.109901	0.072658	-0.0424772	0.000227434	0.0727551	0.0929057	0.0215539	0.0785614	0.0373106	-0.210215	-0.0153696	-0.0199311	0.112188
P56378	0.0661151	-0.0680692	0.035811	0.0766392	0.0269118	0.0117402	-0.0188249	0.00610462	0.00997596	0.00940032	0.0111265	-0.0795548	-0.0388021	-0.0198796	-0.0286941
Q9BVL2	0.028066	-0.0476526	0.0677813	0.0364847	-0.0393131	-0.0397922	-0.0583746	-0.117293	-0.0426696	-0.00968309	0.0799215	0.155591	-0.000786735	0.00713485	-0.0194142
Q7L2H7	0.327903	0.0916299	0.159822	-0.0746138	0.0493287	-0.0642335	-0.161682	-0.0179199	-0.0755512	-0.171142	0.122916	0.0136864	0.0697563	-0.154124	-0.115776
O00203	0.0177443	0.191358	-0.0114295	-0.175442	0.120089	-0.00499099	-0.0204886	-0.0193452	-0.0889293	-0.0465611	-0.00523401	-0.0501228	-0.0282882	0.136981	-0.0153406
O60248	-0.171018	0.0625803	-0.0120219	-0.00427108	-0.0081456	0.0197699	0.00562001	0.0420327	0.0296736	0.0260847	0.00854198	0.0134304	-0.00671353	0.00101867	-0.00658183
P16152	0.0235521	0.174512	0.0539721	-0.143085	0.255119	-0.0176652	-0.0591204	0.0389485	0.000340819	-0.0036691	-0.339267	-0.169658	-0.0197541	0.172866	0.0329073
O00299	0.0441431	0.274801	0.0827909	-0.581953	0.422087	0.0777875	0.0608891	0.0814817	-0.00162605	-0.00503063	-0.187996	-0.243665	-0.179358	0.230372	-0.0747242
Q5C9Z4	0.0515547	-0.00383129	-0.0407173	0.0354727	-0.0345828	-0.0103233	-0.0314482	-0.00763754	-0.0112539	-0.0243568	0.0573283	0.0324675	0.0417657	-0.0849495	0.0305117
Q9H3U5	-0.0157637	-0.00726753	-0.0512452	-0.00333389	-0.0123815	0.0484942	-0.00209239	0.0303334	0.00569274	0.0279669	0.0603139	0.043671	-0.0166361	0.0171207	-0.124872
P57088	-0.0276157	-0.228051	0.0411585	-0.0174923	-0.115132	-0.0293137	-0.0434667	0.0442752	-0.00595553	-0.00130781	0.304063	0.218557	0.102649	-0.140838	-0.101529
Q9NYH9	-0.0351047	-0.0735271	-0.0564404	-0.0771511	0.0477213	0.0805162	0.0609066	0.115957	0.0301964	-0.0258837	0.0260924	-0.00519173	-0.0631843	-0.0515568	0.0266505
Q14258	0.0296561	0.285523	-0.0729948	-0.382989	0.0769089	0.100477	-0.0871019	-0.00474383	-0.0186049	0.0670227	-0.169296	-0.0917226	0.0257516	0.1755	0.0666143
O15372	0.0973544	0.212157	0.187012	-0.226589	-0.208251	-0.207187	-0.185586	-0.112487	0.147654	-0.18303	0.297635	0.10666	-0.227403	0.219651	0.0824084
Q5VT52	0.172996	0.0710105	-0.139241	-0.0516328	-0.0296266	-0.0291027	-0.0403272	0.0466317	-0.0502504	-0.0122932	-0.0135372	-0.0202562	0.0414824	0.02927	0.0248768
P42771	0.0544582	0.19109	0.0274066	-0.209979	0.117272	-0.00140755	0.0141854	0.069221	0.0142276	-0.0737222	-0.0678469	0.0542656	-0.0788639	-0.065165	-0.0451418
Q96EK5	-0.0511019	0.0831994	0.0272912	0.0163173	-0.0248387	0.0332467	0.0471517	-0.068537	0.0344823	0.00962042	0.0218402	-0.0211104	0.0671077	-0.00516653	-0.169502
Q9BY32	0.0695347	0.0286693	0.0166221	-0.103557	0.0662257	0.0315723	0.0683832	0.0720124	0.0729903	-0.0442189	-0.0260945	-0.0147753	-0.0828071	-0.0715555	-0.0830017
Q7Z589	0.108538	0.0428459	-0.0734388	0.0597946	0.0661081	0.0129581	-0.0214535	-0.0511892	0.00190508	-0.0420137	-0.0536269	0.135707	-0.0719678	-0.0783868	-0.0357799
P40222	-0.0203127	0.193185	0.076485	-0.211453	-0.132311	0.0732439	0.116211	0.0877329	-0.00831512	0.0214068	0.0960056	-0.165928	-0.0160965	-0.0949359	-0.0149186
Q86UT6	0.0625162	-0.0440104	0.000409494	0.00656374	0.0263262	-0.00191893	0.00938783	-0.050581	0.0429145	0.00840056	0.0136476	-0.0897556	-0.0239558	0.055564	-0.0155084
Q16775	0.00577316	-0.0376685	0.0111241	0.082776	0.014202	0.109147	0.0815879	0.0768651	-0.11737	-0.0129104	-0.0454717	-0.158441	-0.070579	0.0153129	0.0456528
P35250	1.13237	-0.0291259	0.0606654	-0.164657	-0.0152529	-0.151271	-0.101754	0.0236326	-0.0528896	-0.140522	-0.0463346	-0.12143	-0.173148	0.0235179	-0.243801
O15164	0.0291567	0.00122517	-0.109974	0.0270985	0.00193777	-0.0983946	-0.0390033	0.0606113	0.00667685	-0.017993	-0.0320471	-0.0843556	0.11954	0.040069	0.0954521
Q9NPQ8	-0.0317196	0.155153	0.050437	-0.077333	0.00267815	0.0302825	-0.0613049	-0.0689681	-0.00911852	0.0202721	0.0542613	-0.127111	-0.0433691	0.170118	-0.0642772
Q15043	0.0626435	-0.0213815	0.0403034	-0.00328768	0.0234567	-0.0144	-0.00384389	0.00428487	-0.0299262	-0.0354069	0.0664569	0.00878344	-0.0309698	-0.0902936	0.0235809
Q9P0J1	-0.0324699	-0.0712399	-0.0550999	0.189386	0.0381663	-0.085392	-0.0686217	-0.0612524	0.101227	-0.00472653	-0.0961041	0.0583874	-0.0132488	0.0572473	0.0437406
Q6IAN0	-0.0312412	-0.0898317	-0.103816	0.297104	-0.0562069	-0.177769	0.0192513	0.0346475	0.0636805	0.0820523	-0.0256926	0.0171918	-0.0513968	-0.0120975	0.0341247
P06280	0.035375	-0.0633202	-0.0356566	0.0382114	0.0124762	0.0546242	-0.0347231	-0.124528	-0.0742529	-0.0672156	0.0877184	0.164237	0.0776585	0.00832139	-0.0789259
P06865	0.077496	-0.162924	-0.0666001	0.105504	0.258847	-0.137774	-0.119861	-0.211609	0.12059	0.0620359	-0.181845	0.265835	0.0859212	-0.0229365	-0.0726796
Q96T60	0.140135	0.19796	-0.0133449	-0.364559	0.0436289	-0.0243071	0.0574448	0.0536017	-0.150013	0.107254	-0.0648754	-0.0449086	0.0612245	0.0645187	-0.0637596
Q13426	0.0547782	0.0535335	0.00396569	-0.0786763	0.0516315	0.00566109	-0.00499717	0.0208568	0.0538908	0.0517026	-0.20397	0.0160946	-0.010605	0.0370469	-0.0509138
Q9NRG1	0.016386	-0.0910336	-0.0275781	0.115362	-0.0889841	0.0810324	0.0449461	0.0476915	0.0652663	0.0252927	0.15419	0.0402533	-0.437347	0.0322499	0.0222727
Q9NY61	-0.0103728	0.119032	0.0585098	0.077751	-0.042899	-0.023589	-0.00736998	-0.0627164	-0.0517807	-0.194824	0.0602327	0.105616	0.037743	-0.0862667	0.0209338
Q14807	-0.0315593	-0.022446	-0.127139	0.0082132	-0.147093	0.158176	-0.0241137	-0.0128134	0.0666815	-0.190449	0.183289	0.0639159	0.0794003	-0.063978	0.0599155
O95870	0.0018332	-0.069379	0.0025361	-0.0199749	0.0011931	0.00635911	0.0108349	-0.0518439	0.0343798	0.050305	0.0720916	-0.00771814	-0.101802	0.0362299	0.0349554
O43776	0.143217	0.598652	0.0410923	-0.440234	0.154496	0.104141	0.0782777	-0.13989	-0.166717	0.091096	-0.108859	-0.175796	-0.0371514	0.0764023	-0.218725
Q13601	-0.00233598	-0.0379517	0.0941245	-0.0231811	-0.000853522	0.0155467	0.0928984	0.0517752	-0.224445	-0.0793704	0.104483	0.140239	0.0931171	-0.21218	-0.0118657
Q4G0N4	-0.0844267	-0.0205606	0.0313694	0.12536	-0.101464	0.0740662	-0.132995	-0.138425	-0.0133957	0.0666976	0.210513	-0.106805	0.172729	0.00527363	-0.0879361
O60318	0.055312	-0.0532888	0.000393474	0.0148417	0.0153185	-0.0405011	0.0214872	-0.0167285	-0.0236284	0.00401313	0.0272782	0.0591495	-0.00151212	-0.0283825	-0.0337522
P14635	0.0537022	0.0147463	-0.0760121	-0.0639065	0.0334018	0.0517936	0.025975	0.0166843	-0.0037294	-0.00601205	0.0973449	-0.0119664	-0.00510139	-0.103839	-0.0230817
Q6IAA8	-0.142294	-0.0424053	0.0807256	0.106575	0.0726492	-0.100714	-0.211665	0.0512031	-0.116991	0.0332245	0.0992326	-0.0466269	0.167975	-0.0249147	0.0740258
P40937	0.0219306	0.19207	-0.101491	-0.167011	-0.284542	-0.000477913	-0.048459	-0.0187922	-0.00648997	0.135691	0.00528731	0.0174042	0.130773	0.182605	-0.0584978
P10619	0.0115232	-0.316661	-0.0361435	0.174738	0.0526132	0.0152115	0.160562	-0.12798	0.163593	-0.0992079	-0.306935	0.182715	0.0109497	-0.000326653	0.115348
Q7L576	0.243229	0.0709552	-0.163711	-0.228409	0.191097	-0.123256	-0.160217	-0.176876	-0.191071	0.19755	-0.0599141	0.26804	0.144285	-0.0851705	0.0734682
P55010	0.117538	0.397427	0.328964	-0.320832	-0.0236205	0.0422887	0.0010872	0.0311833	-0.104722	-0.0732025	-0.218335	-0.00959818	-0.113741	0.0732065	-0.127643
Q9H330	0.0163507	-0.148304	0.0526422	-0.0132045	-0.0121249	0.0317754	0.0160646	-0.0400695	0.0457418	-0.0167702	0.0995201	0.0149453	-0.0815585	0.0280593	0.00693189
Q8WWQ0	0.284687	-0.0342193	-0.103961	0.0746772	0.012942	-0.0049117	-0.0152517	0.194192	-0.094232	-0.00508455	-0.000582359	-0.0646741	-0.078755	-0.145401	-0.019426
P30044	0.198191	0.270886	-0.378304	-0.113648	0.192237	0.0461762	0.0396954	0.104772	-0.0374573	0.0222259	-0.552987	-0.0916563	0.0749777	0.195303	0.0295884
Q9NQS7	0.0616514	0.0384558	0.0031958	-0.125213	0.0560034	0.0293153	-0.0101715	-0.0069964	-0.0114081	-0.00689701	0.0794862	0.0323095	-0.116915	-0.0395258	0.0167092
Q9H6W3	-0.181747	-0.0501483	-0.0566843	0.0238146	0.0324563	-0.0123651	0.0178123	0.0297407	-0.0105655	-0.00631144	0.0717724	0.103816	0.0733001	-0.0812318	0.0463409
Q6ZXV5	0.132867	0.0115597	-0.0683717	0.0222533	-0.24196	-0.0763508	-0.0059964	-0.0275901	-0.025443	-0.0137206	0.0977905	0.0564398	0.0835732	0.104191	-0.049243
P27816	0.104393	0.573499	-0.119192	-0.238573	0.272554	-0.101389	-0.0320969	-0.0387957	-0.0308494	-0.0275807	-0.359173	-0.169674	-0.122092	0.260858	0.0281101
Q16740	-0.028357	-0.157929	0.0280908	0.105451	-0.234653	0.0380923	-0.103794	0.0190777	0.053575	0.154132	0.13411	0.0434325	0.129412	-0.191725	0.0110846
Q5SSJ5	-0.0897633	-0.0785318	-0.440207	0.262581	0.0116638	0.0993482	0.101207	-0.013919	-0.160621	-0.0545481	-0.191085	0.128157	0.125298	0.0271316	0.273287
Q9ULW0	-0.0951526	-0.0308054	-0.0641349	-0.0580652	0.0161726	-0.00882399	-0.0366007	0.00186749	-0.0619474	0.0421396	0.25057	0.0335766	0.0864226	-0.0921059	0.016887
Q6VMQ6	0.0483935	0.0335003	0.0678165	-0.0261506	-0.0830431	0.00603879	0.00204895	-0.0358358	0.0155667	0.044255	-0.0185002	-0.0637414	-0.0121753	-0.0130124	0.034839
P04637	-0.0541901	-0.209138	-0.0122787	0.219784	-0.167293	-0.126281	0.0896972	-0.0139244	0.103667	0.0763675	0.0300166	0.113115	-0.103817	0.160126	-0.105851
Q96DZ1	0.0222453	0.116064	-0.188054	0.101802	-0.0897637	0.0401152	-0.00641555	0.0304276	0.0264314	0.0428235	-0.0492527	0.0225529	0.0169146	-0.0815215	-0.00436869
Q7Z2Z2	0.0723297	0.102091	-0.0182405	-0.00837083	-0.00711837	-0.00445391	-0.0452285	-0.0140774	-0.011953	-0.0224245	-0.0681919	-0.0243283	0.00842345	-0.0273688	0.0689117
O43488	0.0401724	0.0812877	-0.0362604	0.0625827	-0.0529101	0.0357023	0.163056	0.0762569	-0.000217133	-0.0305203	-0.167567	-0.0483706	-0.00993214	-0.113416	0.000135709
Q8NF91	-0.544288	-0.0562409	0.0190802	0.120125	-0.0270427	0.0359706	0.0808885	0.0677179	-0.0543225	0.0631427	0.184905	0.143695	0.00687885	-0.040996	0.000485691
Q96P16	-0.0310112	0.00997748	0.0371242	-0.0607635	0.0710679	-0.0194959	0.0418963	0.0589346	-0.0427739	-0.0277561	0.0111374	-0.0617428	0.0150577	-0.0425504	0.0408983
Q9NQG5	0.172511	0.0459387	0.0399757	-0.308599	0.00826177	0.0411803	0.17477	0.1444	0.158249	0.0370242	-0.0869384	-0.168341	-0.140943	0.0595295	-0.177018
Q9NZD4	-0.156963	0.0522207	0.0440456	0.05448	0.0290296	0.0364233	0.0263934	-0.00112881	0.090524	0.0824248	-0.0214615	-0.0438004	-0.020769	-0.189567	0.0181489
Q9UJ83	0.134992	0.021945	-0.0759801	0.0854241	-0.0697914	-0.12541	0.0293706	0.112403	0.0140051	-0.139301	-0.00851892	0.12396	0.143735	-0.100791	-0.146042
P50897	0.121305	-0.179893	0.0094898	0.068618	0.152113	-0.0255456	-0.0586724	-0.0402871	-0.058494	-0.0246407	-0.128987	0.0632005	0.124265	-0.083619	0.0611478
P63010	-0.0855345	-0.157117	0.184011	0.218236	-0.0212963	0.0678525	-0.216601	-0.0519562	-0.0559684	-0.331663	0.0193636	0.0948581	-0.0845611	0.166542	0.253834
P11802	-0.00527495	0.122017	-0.0788132	-0.0516225	0.106318	-0.0622659	0.00237982	0.0544443	-0.0144074	0.0266742	-0.105837	-0.0922138	0.0474476	0.0480519	0.00310138
Q14C86	0.217457	0.220454	-0.0588437	-0.198593	0.083488	-0.0442378	-0.0231427	-0.0739382	0.00448015	0.0869653	-0.0838348	0.0205613	-0.120527	0.0995314	-0.12982
P04062	0.0322196	-0.121625	-0.122758	0.270598	0.0232032	0.0298837	-0.0540672	-0.0384194	-0.0792101	0.0635631	-0.151736	0.0815863	0.130947	-0.0725568	0.00837199
O43663	-0.000272872	-0.148977	-0.00696454	0.00968586	-0.0580246	0.0731158	0.029949	-0.00178392	0.0184636	0.0256809	-0.0793765	0.0607269	0.0122812	0.051632	0.0138641
Q9H061	-0.0663963	-0.0334346	0.135627	0.174599	-0.060881	0.032509	-0.104333	0.00454649	0.0519788	-0.00742959	-0.0564132	0.0713264	-0.0449212	-0.0896445	-0.00713345
P43155	-0.074434	-0.0962487	-0.111957	0.2316	-0.0450897	-0.0693822	0.0750602	-0.0114955	-0.104841	0.157073	-0.0600059	0.125821	0.00793828	-0.109123	0.0850845
Q14CX7	0.0598228	0.0685391	0.22367	-0.0742463	-0.152436	-0.0615163	-0.124105	-0.149912	-0.0535524	-0.00632464	0.0121955	-0.019141	0.104034	0.196507	-0.0235343
Q9H8H2	0.12121	-0.103738	-0.0219137	0.0768672	0.00133621	-0.0576707	0.0182089	-0.0561824	-0.0475421	-0.134707	0.136613	0.0931375	0.0339193	0.070447	-0.129984
Q13618	0.0927032	0.112027	-0.206654	-0.0628294	0.0525145	-0.0636634	-0.0170711	0.0411871	0.0487023	-0.0288074	-0.0792645	-0.0626164	0.0564969	0.105303	0.0119721
Q9Y5X1	0.0398125	0.0237819	-0.151681	-0.0513369	0.0353048	0.0474168	0.0615532	-0.0923984	0.00935277	0.00710284	0.0886101	-0.0164311	-0.013983	0.0351207	-0.022225
Q92552	-0.16437	-0.233502	0.173532	0.336329	-0.0744321	-0.0433743	-0.0470691	0.0847721	0.0384781	-0.0317332	0.162006	0.0801298	0.0523613	-0.280342	-0.0527844
Q10567	0.0732079	0.0879145	-0.00398975	-0.0246038	-0.114102	0.00523374	-0.0362004	-0.10512	0.0365986	-0.120067	-0.131993	0.18188	0.0405778	0.11453	-0.00386608
Q3SXM5	-0.0763703	-0.0653277	-0.0588913	0.0385669	-0.117896	-0.0606598	-0.00495387	-0.0219309	0.0168245	0.101686	-0.00263723	0.111121	0.0617078	0.0150945	0.0636664
Q96ST2	0.103875	0.0161391	-0.0980295	-0.0219924	0.0605375	-0.10004	-0.0102435	0.0108602	-0.0559388	0.124239	-0.0449395	0.0800551	0.0473395	-0.0686603	-0.0432015
P52298	0.0424482	0.0833018	-0.210463	0.0897207	-0.0342216	0.0418844	0.0195488	0.0598289	-0.00598746	0.0638437	0.0487231	0.0138024	-0.0347174	-0.189746	0.0120332
P61978	0.00236898	-0.55408	0.188734	0.207256	-0.594279	0.0976267	0.343856	0.542259	0.498318	0.220686	0.0472223	-1.07359	-0.433701	0.348937	0.158388
Q9Y3U8	-0.120309	0.483532	-0.0464945	-0.41695	0.10107	0.000570186	0.0356053	0.0625005	0.0184244	0.0983871	0.122706	-0.346998	-0.168191	0.0277324	0.148415
O60678	0.0536591	0.0955637	0.067791	-0.0207393	-4.34117e-05	-0.0412978	-0.0173019	-0.0327193	-0.0184364	-0.0210186	-0.0742447	0.0432477	-0.040147	0.063357	-0.0576702
O60443	0.0261419	0.0419576	-0.0146865	0.0167462	-0.00350303	-0.00441285	0.0130208	0.0115085	0.0104301	0.0196947	-0.0213816	-0.0328455	-0.0621284	-0.010376	0.00983402
P28331	-0.0669862	-0.556547	-0.16199	0.248721	-0.263791	0.0436698	-0.0668452	0.0196414	-0.0726328	-0.0935403	0.39483	0.344881	0.175067	-0.101212	0.156735
Q9P246	-0.245589	-0.205913	0.0348326	0.0976893	0.0759222	0.0388082	0.0467945	0.0522362	0.0580803	0.0124478	-0.068047	-0.0663843	0.101328	-0.103235	0.171029
Q9Y314	0.0207664	0.184582	0.00155359	-0.15146	0.0935561	0.0184952	0.0900896	-0.0127535	-0.15656	-0.13776	-0.0280085	0.0192625	-0.0199602	0.102794	-0.0245975
P16070	-0.397786	-0.138779	0.454977	0.201787	-0.39132	0.0375361	-0.0646101	-0.00962771	0.0476983	0.151906	0.297211	0.265425	0.174587	-0.570395	-0.058609
Q9H6Z4	0.174984	-0.00558707	-0.0527128	-0.0674716	0.0850482	-0.00999632	0.022451	-0.00752717	-0.0377371	0.110892	-0.0493329	0.00575025	-0.153501	0.0380327	-0.0532921
P22626	-0.450609	-0.965464	-0.105125	1.90132	-1.12417	-0.0799594	0.0942155	0.277727	0.145862	0.461351	-0.465853	0.644181	0.399855	-0.62133	-0.111998
Q8NEJ9	-0.00713746	0.0145718	0.107264	-0.261732	0.00496849	-0.0667413	0.0607474	0.0728496	-0.00779436	0.015109	-0.0378894	-0.0580628	0.083705	-0.0144056	0.0945478
P62937	0.38101	1.3612	-0.0727518	-0.803963	0.821475	-0.116047	-0.131345	-0.0880886	-0.0228975	-0.124551	-0.765865	-0.271867	-0.115415	0.453722	-0.504613
Q9HD42	-0.0325865	0.0676033	-0.0366639	-0.0138018	-0.021765	0.0405402	0.0117704	0.0815417	0.016726	0.0563959	-0.0459739	-0.0537992	-0.0709622	0.0205409	-0.0195659
Q9UNM6	0.142946	0.0617931	0.137401	-0.310842	0.146197	0.0686025	0.0208973	-0.184384	0.201182	-0.0561616	-0.0319513	-0.134205	-0.0952803	0.186412	-0.152608
Q8WVM8	0.235786	-0.169833	-0.133695	0.0490344	-0.0504514	-0.148962	0.0460145	-0.162449	0.0573428	0.0726876	0.0147891	0.227741	0.153254	-0.221972	0.0307136
P30626	-0.00766988	0.115774	-0.0567391	-0.213092	0.0840245	0.0560898	0.139572	0.118097	0.135683	0.0409239	-0.191422	-0.0456414	-0.0397769	0.0201726	-0.155995
Q9UBQ5	0.0747127	0.097706	-0.0145956	-0.132062	0.0290887	-0.0315319	0.0205256	-0.0681263	0.0224326	0.0300999	0.111513	-0.0996128	0.0140073	-0.0312757	-0.0228811
O94919	-0.0619753	-0.147491	-0.066283	0.107313	0.0451961	0.0116766	0.0317423	0.0368656	-0.0117664	0.0263388	-0.0309729	0.0207422	-0.0660508	0.0103985	0.094266
P04843	-0.140359	-0.787652	-0.126645	0.992592	-0.2173	-0.147958	-0.273837	-0.136018	-0.162028	-0.145127	0.152444	0.794334	0.436249	-0.302851	0.0641571
Q13617	0.0945163	-0.0664172	0.130921	-0.148251	0.0849355	0.0749884	0.0442007	0.0973548	0.0207762	-0.152667	0.0174464	0.024845	-0.00379034	-0.0231874	-0.195672
P07437	0.215765	0.591422	0.0344069	-0.614477	0.365142	-0.0224703	-0.0502199	-0.00388783	-0.0182836	-0.00756466	-0.133238	-0.25835	-0.215034	0.249151	-0.13236
P62249	0.215151	0.0227291	0.398838	-0.390495	-0.013715	-0.00866544	0.00789421	-0.12471	-0.0387541	-0.00488623	0.991641	-0.776641	-0.233269	-0.0862979	0.0411795
Q9Y2B0	-0.0814552	-0.142646	0.076822	0.0963592	-0.0713691	-0.055379	0.0427494	0.123895	-0.190561	0.00977863	-0.0355976	0.0707727	0.0766266	0.0739611	0.00604361
Q9HB07	0.0775775	-0.0574625	0.087818	-0.142969	0.0877392	0.0974922	0.0341248	0.0619862	0.0100022	0.0485712	-0.158349	0.00974692	-0.105348	0.0471424	-0.0980729
Q96KQ7	0.0955121	-0.0633947	-0.00525824	-0.0838763	0.037532	-0.0196423	-0.0241239	-0.0248322	0.0127086	0.127879	-0.143412	0.0546366	-0.0728761	0.0228728	0.0862741
Q9NPA8	-0.147767	-0.0491744	0.0075532	0.0872334	-0.0420897	0.0269092	0.0173054	-0.0521218	-0.021183	-0.0284147	0.0913005	0.0282609	0.0263344	0.0212579	0.0345959
P16435	-0.0163164	-0.210884	0.419489	0.0517786	-0.216523	0.0545906	0.111685	-0.213002	0.0402557	-0.111419	0.0371744	0.246805	0.136189	-0.360835	0.0310113
Q9NX46	-0.018643	-0.0206528	-0.0376204	-0.0363835	-0.0157328	-0.0225733	-0.0176341	-0.0214659	-0.0324238	-0.0260463	-0.107452	-0.0223049	-0.0303022	-0.0316545	0.44089
Q16531	0.29053	0.0352088	-0.236574	-0.513516	0.420755	0.234325	-0.241578	0.367046	-0.236371	0.0314651	-0.270801	-0.0837629	-0.120722	0.615693	-0.291697
O95182	-0.163759	-0.162804	0.102564	0.000450239	-0.0309925	0.136588	-0.060348	0.0496167	-0.0818154	0.116705	-0.0388651	0.024021	-0.0108442	0.0492581	0.0702262
Q16762	-0.104593	-0.0582082	-0.0305724	0.211284	0.0849104	0.0063913	-0.0375835	0.0772721	0.0305035	-0.131928	-0.226283	-0.0421284	0.106738	-0.0776395	0.191835
O43143	0.218463	-0.558818	0.344209	-0.363434	-0.104051	-0.152777	0.210454	-0.178778	-0.194613	-0.111884	0.127007	0.204548	0.100761	0.191759	0.267155
Q9BV79	0.0338617	-0.144714	-0.0639589	0.158097	-0.0758726	0.0385435	-0.0541067	-0.00697115	0.0583488	-0.0195758	0.0327434	0.0520247	-0.000824386	0.0403854	-0.0479817
Q14344	0.0466568	-0.146769	0.0211385	0.153818	-0.0507664	0.0187344	-0.157748	0.00669877	-0.0546779	0.0170869	0.0941525	0.0744556	-0.00167026	-0.10184	0.0807306
P43243	-0.188538	-0.670711	-0.134447	0.48448	-0.192423	0.0512574	-0.134491	-0.0988385	-0.0320777	-0.0386934	0.467408	0.139779	0.145256	-0.295852	0.49789
P13928	-0.0798559	0.0329883	-0.0839963	-0.162968	0.144443	0.0191022	0.0771939	0.0925692	0.0314051	-0.0144171	-0.0729176	-0.0898366	-0.0121471	0.0775327	0.0409039
Q9Y2S7	-0.0858366	-0.0558818	0.143733	0.0624395	-0.195146	-0.0885353	0.0788306	0.0432104	-0.0879875	-0.1331	0.240412	0.285404	0.206547	-0.224994	-0.189095
Q15154	0.049076	-0.109729	-0.0718235	0.0508164	0.0766659	0.0249077	-0.0528332	0.0138254	0.0100787	-0.0136046	0.0455001	0.0884133	0.0142476	-0.0705477	-0.054993
Q14691	0.0347929	0.0288223	-0.0533212	-0.0460845	-0.022594	0.031908	0.0395671	0.0337025	0.032447	0.0167043	-0.0839254	0.0310028	0.0313505	0.0107859	-0.0851583
Q9UNS2	0.123973	0.113077	0.0486983	-0.0937775	-0.0110163	-0.0616688	-0.0875878	-0.0595363	-0.0212433	0.0277459	0.0972144	-0.0275224	-0.070428	0.158882	-0.13681
Q8TCS8	-0.0816967	-0.450313	0.0132479	0.173647	-0.261456	0.0377871	0.073484	0.0825823	-0.0787276	0.0386891	0.410627	0.147181	0.107367	-0.21686	0.00444127
Q92621	0.15464	-0.312818	0.115087	-0.0126022	-0.0949982	-0.103116	-0.0171358	-0.140255	-0.0722554	-0.127117	0.326439	0.28216	-0.0391827	0.0339767	0.00717849
Q03135	0.159859	-0.445384	0.133951	0.424799	0.0080802	-0.00252863	0.0300991	0.0871262	0.0686003	-0.285631	-0.00523275	-0.122973	-0.0287815	-0.160571	0.138586
Q14289	0.0332367	0.110136	-0.255782	-0.179634	0.0765244	0.0235251	0.0534288	0.0497715	-0.0292809	0.0668021	-0.208277	0.0534908	0.0972735	0.0574728	0.0513119
Q9HCN8	0.0364449	-0.274181	0.0184248	0.0429897	-0.0658185	0.0679337	0.0578668	0.0474253	0.0407095	0.0469871	0.0479072	-0.0143686	0.0376618	-0.0771071	-0.012876
Q9Y3C4	-0.0184499	0.0295291	-0.00651974	-0.00325275	-0.0337289	-0.0189372	-0.0642948	-0.0322136	0.0702873	0.0147574	0.0728995	0.0550739	-0.0184881	-0.0313455	-0.0153168
Q6UY14	0.0290617	-0.107951	-0.0662972	-0.033289	-0.03356	0.0304105	0.0116662	-0.00109998	0.00789935	0.0199949	-0.0554483	0.05343	0.0206408	0.0456234	0.078919
P17980	0.448925	0.255867	0.0154334	-0.438284	-0.00205186	-0.0327245	-0.0935926	-0.158577	-0.0915346	0.0984767	0.0414311	0.00587802	0.0694988	0.074698	-0.193444
O14656	-0.0195893	-0.0439652	-0.0619629	0.0846013	0.0150854	0.0348161	-0.00333722	-0.0507078	-0.230403	0.0150917	0.0352636	0.162801	0.108727	0.0153725	-0.0617939
Q9Y6X9	0.0217136	-0.0101672	-0.00894222	0.0150519	0.0435787	0.00510557	0.0144696	0.0122912	0.0389874	0.0314631	-0.125969	-0.00639891	-0.0233627	-0.000639996	-0.00718087
P78330	0.037264	0.0550161	0.104212	0.0229758	-0.160078	0.0667488	0.0229898	0.0198838	-0.0621179	-0.0779697	0.0849535	0.028703	-0.105869	-0.0272737	-0.00943824
P04899	0.189241	-0.189185	-0.133327	0.271323	0.0997973	-0.0386355	-0.0256721	-0.0885888	-0.0523358	-0.0496284	-0.110126	0.126116	-0.0860237	-0.0483257	0.135372
Q9Y4W2	0.0305583	-0.0980267	0.0709979	0.362505	-0.128808	-0.0315761	-0.207905	0.0200707	-0.0132086	-0.0625684	0.0556682	0.205244	-0.0134616	-0.0266012	-0.162889
P82930	0.00877437	-0.0927276	-0.0036724	0.0138351	-0.0316176	0.121318	0.0148884	0.0241947	-0.113715	-0.333281	0.239201	0.18132	0.0547441	-0.0977844	0.0145218
Q9NZ45	0.0570287	-0.123397	-0.15235	0.0897225	0.0192634	0.0399519	-0.0301682	-0.0410989	0.025061	-0.00958828	0.0242414	-0.0571668	0.0856384	0.00300318	0.0698588
Q16543	-0.0105639	0.184135	0.00273987	-0.208604	0.1067	0.0536054	-0.0330943	0.131299	0.00143073	0.163496	-0.00998342	-0.227242	-0.10403	0.143129	-0.193017
Q13438	-0.102576	0.100382	0.0287486	0.121245	-0.147669	0.0464865	0.0703599	0.128961	0.0960758	0.0114866	-0.10556	0.00111209	-0.0717242	-0.132026	-0.0453024
Q9NQ50	-0.0431816	-0.147158	-0.0802037	0.188499	-0.115192	-0.0319171	0.0631753	-0.0338141	0.0567755	-0.0600912	0.14071	0.0861832	0.0587054	-0.0561337	-0.0263554
Q9UG63	0.149081	0.254586	-0.0530804	-0.354374	0.129692	-0.0926356	0.0330145	0.0145031	-0.183275	-0.0105866	0.199775	-0.14305	-0.0620947	0.0314893	0.0869543
Q9H0E3	-0.00376178	0.0183727	-0.00943824	0.0160755	0.00982059	0.00067065	-0.100303	0.0659433	-0.00229327	0.0202184	0.00688077	-0.0477759	0.0206642	-0.00221165	0.00713779
Q15369	-0.240295	0.326695	0.0148433	-0.0302936	0.0921389	0.0996708	0.025862	0.0920394	-0.046258	0.229457	-0.112048	-0.0697382	-0.0528165	-0.134834	-0.194423
P26045	-0.0509513	-0.0474427	-0.116903	0.161346	-0.0551264	-0.0433815	0.0933139	-0.0676527	0.0103388	0.0913642	-0.0394128	0.070282	-0.0276665	0.000753833	0.0211377
P98179	0.0441069	0.080637	0.0865962	0.125112	0.009771	-0.09753	-0.022164	-0.00361622	0.0375318	-0.0397985	-0.350403	0.0830805	0.0796364	0.0660903	-0.0990505
P48059	-0.0229249	0.0403297	0.0209147	0.00809105	-0.0213284	-0.00493908	0.0260803	-0.0127037	-0.006471	-0.00604166	0.00817504	0.00652716	0.0394522	-0.0805442	0.00538277
P26368	-0.0504875	-0.237289	0.448569	0.0913279	-0.172543	-0.0487525	-0.074211	0.0672941	-0.0173034	-0.131106	0.392587	-0.300766	0.0190603	0.0062496	0.0073712
Q9NRR5	0.0341624	0.061464	-0.00696303	-0.0100418	0.0680384	0.00999897	0.0236503	-0.0938164	-0.036148	-0.00257056	-0.0467875	0.0304313	0.0896686	-0.00699185	-0.114095
Q8N4Q1	-0.202121	-0.0832697	0.033918	-0.13254	0.128853	0.0862389	0.051233	0.148908	-0.10497	0.0171125	-0.0252859	0.0265157	-0.0578178	0.163908	-0.0506825
P20073	0.051065	0.302168	-0.251347	-0.390201	0.148916	0.0789956	0.101783	0.244458	-0.0486691	0.0393837	-0.166758	-0.0942274	-0.00759276	0.0438821	-0.051856
Q5JRA6	0.0702299	-0.112487	-0.0228242	0.0169752	0.0489311	-0.14061	-0.0963804	-0.0411356	-0.102288	-0.0275759	0.0839327	0.306383	0.0610937	-0.075675	0.0314305
Q9BVG4	-0.00153591	0.172946	0.0169795	-0.203404	0.125197	0.0664757	0.0248901	0.0053563	0.0125158	0.085892	-0.0463294	-0.12982	-0.139815	0.0310997	-0.0204478
Q16186	-0.028723	0.138485	0.148727	-0.156425	0.0123908	0.0792159	0.0315497	0.136951	-0.236358	-0.00549935	-0.0386364	-0.0797548	-0.00366198	0.0695079	-0.0677694
P82932	-0.109719	-0.168905	0.0589061	0.0977348	-0.0903509	-0.0122158	0.0621507	0.0934073	-0.00611202	-0.037563	0.012442	0.10276	0.0505033	-0.0412104	-0.0118276
O43913	0.0115224	-0.0401265	0.0368851	0.230096	-0.0122137	-0.0496129	0.0392387	0.0523393	-0.0430734	-0.00770078	-0.0300767	-0.0297743	-0.138366	-0.00570601	-0.013431
Q14571	0.000922362	-0.103734	-0.00741868	0.000597993	-0.0133362	-0.00550343	-0.0194144	0.030032	0.00225929	0.0314927	0.0524602	-0.0134519	0.076996	0.00475609	-0.0366582
Q96RQ3	-0.0962741	-0.0926344	0.0230061	0.0976976	0.100081	-0.0705679	-0.0769054	0.0863003	-0.118953	0.0430424	-0.0947878	-0.0483917	0.15558	0.0855032	0.00730335
Q9Y6I3	-0.0023837	0.121407	-0.0221616	0.0208787	-0.136254	0.0820198	-0.103094	-0.0142449	-0.0387916	-0.0394325	0.0553219	-0.0116846	0.108187	-0.0363743	0.0166065
Q9ULU4	-0.0725602	-0.145283	0.124985	0.219023	-0.170705	-0.00633212	-0.109752	-0.079718	-0.014268	0.0721872	0.125757	-0.0156917	0.0503841	0.029736	-0.00776247
P54819	-0.134365	-0.304118	-0.00891853	0.199756	-0.438888	-0.00289152	0.0307554	0.0779679	-0.0234203	-0.00427883	0.339724	0.112517	0.215127	-0.134131	0.0751635
Q13206	-0.0482473	0.0681781	0.00317853	0.0348747	-0.113319	0.0101277	0.0435419	0.177443	-0.0104673	0.0914582	0.150272	0.0662808	-0.105319	-0.1056	-0.262403
P30837	-0.0164899	-0.297481	0.162838	0.088293	0.0479259	-0.107911	-0.0286838	-0.149491	-0.0545023	-0.0577571	0.17339	0.372657	0.0460748	-0.2094	0.0305384
Q9Y6M9	-0.0303731	-0.0305854	-0.0970589	0.0260382	0.0377387	-0.012556	-0.0321143	0.0541801	-0.0111623	0.0978481	-0.0702931	0.133353	0.214459	-0.158046	-0.121428
Q13547	0.122294	-0.222513	-0.0708872	0.290385	-0.0278339	-0.0590756	-0.234746	0.0063383	0.0129937	-0.084897	0.0738389	0.0271545	0.169893	0.00684779	-0.00979232
P29992	-0.0536629	-0.14506	-0.0646489	0.0367369	-0.00583868	-0.0205092	-0.00138604	-0.109661	-0.0388115	0.0206769	0.0784541	0.200553	0.116939	-0.053054	0.0392735
P52735	-0.0814827	0.124699	-0.0230794	-0.120383	0.14315	0.0258775	-0.0239865	0.0302555	-0.0268086	0.0271691	-0.0620535	-0.00587586	-0.0235615	0.0568812	-0.0408011
Q96TA2	0.0706984	-0.0883564	0.00138523	0.0997	0.0106763	0.0924916	-0.105376	0.0123517	0.0917806	-0.222708	0.288986	-0.00523815	-0.0789037	-0.161637	-0.00585048
P40121	-0.060261	0.129462	-0.238884	-0.0884558	0.218521	-0.0223426	0.119394	-0.014518	0.0774652	0.108296	-0.203686	-0.111893	0.0389801	0.126584	-0.0786632
Q9NVP1	0.097481	-0.169278	0.156274	0.222749	-0.19261	-0.0739726	-0.0458257	-0.120413	-0.0748276	-0.0370852	0.315703	0.235986	0.110903	-0.226977	-0.198107
P22087	-0.296868	-0.381294	0.106772	0.293448	-0.149527	0.0962631	0.0927553	0.171386	0.198385	0.168359	0.0485035	-0.0512007	-0.0925613	-0.297791	0.0933703
Q9NTW7	-0.025059	-0.0348019	0.0582905	0.0815034	-0.00970549	0.0176628	0.0137582	0.0334084	-0.00234001	0.0390899	0.0558529	-0.0343981	-0.0903741	-0.110755	0.0078675
Q8NBL1	0.04024	0.0520881	-0.0393588	0.0941682	-0.0428484	-0.0780395	0.0693364	-0.0700135	-0.00845226	-0.0104235	0.0182775	-0.116705	0.044462	0.0484112	-0.00114234
O43823	-0.0827693	-0.00548032	-0.06735	-0.0441657	-0.0777853	-0.0103451	-0.0761748	-0.0340184	0.145457	-0.0410134	-0.0833259	0.135606	0.191699	-0.0452368	0.0949029
Q99570	0.0173839	0.165288	-0.00375536	-0.0566991	-0.00178914	-0.0544625	-0.0741616	-0.000206914	-0.00220821	-0.042819	-0.0741436	-0.0594158	0.0563196	0.0532525	0.0774169
Q06787	-0.0721557	-0.097292	-0.0874755	0.128436	-0.0332422	0.0868606	0.0664388	0.0376408	-0.0124211	-0.0943675	0.0346936	-0.0365277	-0.150251	0.176517	0.053146
Q9H788	0.0383722	0.0261628	-0.0976698	-0.0563371	0.0618869	0.0155466	0.0253572	0.0151822	-0.00993068	-0.0348026	-0.0195182	-0.00913011	-0.00522688	0.0437139	0.00639365
Q9UJX5	0.0287675	-0.0863984	-0.0154295	0.0617926	-0.0552398	0.0345471	0.0095722	0.0032399	-0.00581719	0.0476694	-0.0448497	-0.0317309	0.0213299	0.0715227	-0.0389758
Q9BQI0	-0.0188539	-0.0296414	-0.0441938	-0.161449	0.0375401	0.0808551	0.0376252	0.0410761	-0.0312169	0.00155539	0.0209595	-0.00645242	-0.0274015	0.0680017	0.0315957
Q8NEU8	0.060833	0.181907	-0.00413435	-0.0857996	-0.0651615	0.0539984	-0.010925	-0.0468153	0.017785	0.0749823	-0.0965329	0.122324	0.032255	-0.135186	-0.099531
Q86SQ0	-0.131095	-0.0531591	-0.143764	0.25608	-0.0507065	-0.0569822	0.00730591	-0.0663042	0.0330207	0.016896	0.0259978	0.0833946	0.115146	-0.00138378	-0.034445
Q9P2J5	0.109843	0.419787	0.231278	-0.431542	0.0805333	-0.0749192	-0.18177	0.0319427	-0.0221917	-0.115508	-0.0936854	-0.23005	0.0118028	0.372305	-0.107825
P61006	0.0573857	0.000126604	0.0655703	-0.161928	0.0138981	0.0598636	-0.000468457	0.0228532	-0.00754309	0.0283804	0.0439001	0.104443	0.076963	-0.119931	-0.183513
Q9Y5Q8	-0.188823	0.0670406	-0.00296071	-0.116366	0.0815641	0.114071	-0.0234187	0.0889203	-0.182907	0.0899684	0.0836267	0.152096	0.132315	-0.240196	-0.0549307
Q99873	0.339405	0.227885	0.27976	-0.464216	-0.130205	-0.0094336	0.0492289	-0.0698731	-0.0580525	0.00901851	0.222946	-0.136542	-0.15146	0.215214	-0.323677
O00330	-0.107983	-0.0730428	-0.0773985	0.219224	-0.087295	0.0916608	-0.0399979	-0.0184179	0.0549056	0.0494412	0.0836313	0.0463687	0.12828	-0.218477	-0.0508996
Q9UIQ6	0.0178932	0.0709942	-0.116648	0.0732478	-0.137252	-0.0479653	0.0074832	-0.00113772	-0.10964	0.00666869	0.0966555	0.0687632	0.126224	0.0337284	-0.089015
Q9Y312	0.0520796	0.0201532	0.0210658	-0.0823686	0.0350321	-0.0417243	-0.0290075	-0.0474608	0.0991846	-0.0319145	0.0213699	0.113323	0.0104627	-0.0967442	-0.0434506
Q9BZF1	-0.183022	-0.031975	-0.0649809	0.0860914	-0.103311	-0.0269692	-0.0495105	0.0076562	-0.0402291	0.107218	0.153099	0.139997	0.189841	-0.19502	0.011115
O75396	-0.0928096	-0.226233	-0.166883	0.181574	-0.0272292	0.0061209	-0.0159843	0.116309	0.0263374	0.116006	-0.461833	0.118812	0.130376	0.151202	0.144236
Q96HC4	-0.150907	0.209088	-0.244036	-0.143335	0.109972	0.00927979	0.101387	0.0248662	0.103143	0.00512443	0.0451958	0.0179348	-0.122038	0.00469721	0.029628
Q09161	0.138837	-0.0640752	0.00769291	-0.0162735	0.0555523	0.0559859	0.177702	0.0196823	-0.034625	-0.0735148	-0.0416017	-0.043037	0.0896847	0.111159	-0.383169
Q13595	-0.115673	-0.128631	0.00122619	0.0910839	-0.00106289	-0.00278985	-0.000561552	0.016634	0.0201904	0.0192524	-0.0204021	-0.0155487	0.0943628	-0.0296325	0.0715515
Q00325	-0.142276	-0.751182	-0.327479	0.138405	-0.23954	0.0755352	0.0914515	0.0799217	0.104388	0.13325	0.740681	0.187874	0.315598	-0.433937	0.0273104
Q96DM3	-0.0953656	0.0598586	0.0513967	-0.0254295	-0.0984158	0.0536726	0.0407481	0.00160254	0.038121	0.00996286	-0.0307009	-0.0556883	0.0220749	-0.0253615	0.0535244
Q9Y4C8	-0.0927534	-0.0489045	0.00813889	0.0423165	-0.0707022	0.0617759	-0.124373	-0.00653078	-0.0284189	0.0231739	0.0805163	0.120121	0.0566406	-0.0575677	0.0365666
P47895	0.0511516	0.263307	0.240418	-0.366032	0.107277	0.056645	0.062774	-0.152534	-0.0491451	-0.021314	-0.0412704	-0.0618718	-0.140217	0.0666915	-0.0158794
O75787	0.000436721	0.163171	-0.100959	0.143721	-0.0197845	0.0783799	0.0498906	-0.184006	0.0223709	-0.0146402	-0.112998	0.11164	0.046348	-0.0696556	-0.113915
O00560	-0.0770694	0.145163	0.0019602	0.0845692	0.0234259	-0.0141801	0.0618677	-0.0119966	-0.0275663	0.0145312	-0.123823	0.0602363	0.0508297	-0.0758898	-0.112058
Q8NBM8	0.0393784	-0.0928946	-0.0348327	0.0410947	-0.0336598	0.0152101	-0.00428527	0.00763352	0.0282663	0.000796256	0.00972671	0.0292157	0.0152568	-0.0142971	-0.00660899
Q13724	-0.251204	-0.36711	-0.134024	0.305449	-0.0659274	0.0603781	-0.0422077	0.0248439	-0.0132011	0.169254	0.145758	0.234255	0.189313	-0.371884	0.116307
O00233	0.034873	0.081617	-0.121249	-0.188184	0.0841012	0.0197109	0.0432595	-0.0174612	0.0680725	0.055768	-0.0879457	-0.0222902	0.00513727	0.0666792	-0.0220887
P21399	-0.0715579	0.204834	-0.106054	-0.137398	0.148344	-0.010814	-0.11852	0.0862122	0.0492876	-0.0385456	-0.102483	-0.0185059	0.0298692	0.0626825	0.0226498
Q9BZL6	-0.0125398	-0.107069	0.0401875	0.00289421	0.0248491	-0.00134554	-0.0174575	-0.0217593	-0.00445842	0.00244439	-0.0474312	0.0704917	0.0501039	0.0627667	-0.0416766
P28799	0.128155	-0.12129	-0.159551	0.258466	-0.164131	-0.0175161	-0.012743	-0.0841134	0.0915139	-0.0229422	-0.109033	-0.0356171	0.0556901	0.204051	-0.010939
Q8NBN7	-0.0448681	-0.0474721	-0.00436394	-0.0805624	0.124269	-0.0118738	-0.0191071	-0.0778625	0.0648928	-0.0745311	0.0725531	0.104269	0.0866415	-0.0213173	-0.0706673
Q92620	0.149494	0.0636003	0.205068	-0.019687	-0.0642545	-0.0309765	-0.0209	-0.102213	-0.0810948	-0.122528	0.179144	-0.0364022	-0.128623	0.0696852	-0.0603124
Q9UKB1	-0.12355	-0.0585741	-0.00928279	0.0476534	0.0130939	0.00985672	-0.0142134	0.0205505	0.00538549	-0.0343145	0.0228427	0.0164909	-0.0455999	0.146176	0.00348481
Q9Y3E5	0.0121982	-0.0407057	-0.0177114	0.0183342	-0.00142929	-0.10214	-0.0741564	8.49175e-05	0.0282437	-0.0897136	0.0805066	0.0423284	0.204142	-0.0776811	0.0176996
O75695	0.0306703	-0.0741708	0.0406147	0.0375789	0.0140736	-0.0256447	0.00142083	0.00842021	0.000399178	0.00600804	0.030179	0.00458372	-0.0727921	0.00541287	-0.00675384
Q9NX18	0.0767308	-0.0452074	0.0189971	0.327947	-0.0450885	-0.0730913	-0.0684322	-0.0512192	-0.0719406	-0.0859126	-0.0370138	0.0636552	0.04171	0.0224339	-0.0735684
Q3ZCQ8	0.111013	-0.283453	0.21581	-0.0483845	-0.0720384	-0.0674815	-0.0432734	-0.0936475	-0.0398429	-0.0729769	0.414294	0.0641222	0.00316287	0.0109565	-0.0982606
Q9NPY3	0.0334554	0.0260611	0.0257516	-0.0266721	0.0402402	0.0322283	0.0213164	0.00517356	0.00607004	0.0265434	-0.0199048	0.0382373	-0.0179372	-0.177756	-0.0128073
Q8N5I2	0.00997107	0.0253508	-0.138939	-0.100436	-0.0333558	-0.0206149	0.0437835	0.0268755	0.0518803	0.0205342	0.0693526	0.0270334	0.0207964	-0.00611809	0.00388588
P43121	-0.187769	-0.234158	0.0233652	0.310822	-0.0546292	0.0468963	-0.0715034	-0.05556	0.0254266	0.0768769	0.0623443	0.192845	-0.00231299	-0.236296	0.103653
Q5QJE6	0.0720083	0.0884941	-0.074501	-0.236812	-0.0496286	0.055738	0.00848738	0.238225	0.00233211	-0.0621232	0.0440103	-0.0844432	-0.060605	0.0527689	0.00604958
P52566	-0.0643365	0.113355	-0.00674764	-0.0135094	0.0305753	-0.0187179	0.0312484	-0.0113253	-0.0244562	0.0191635	0.00375133	-0.000457895	-0.0517197	0.0145019	-0.0213253
O43719	0.0135909	-0.236412	0.144656	-0.127451	-0.0137482	0.0697261	0.0333292	0.138942	0.116278	-0.0222829	-0.0158024	-0.102635	0.0218822	0.0671921	-0.0872648
P49721	0.115005	0.178065	0.0572035	-0.186738	0.0990153	0.062076	-0.0157746	0.0864804	0.000939289	0.000251084	0.117076	-0.199375	-0.216849	0.0799545	-0.177329
Q96CD0	0.109225	0.0391007	-0.0366503	-0.0689603	0.00703978	-0.0412195	0.0735519	0.00542145	0.00188031	0.105597	-0.00139297	-0.0594058	-0.0694315	-0.015263	-0.0494925
P07900	0.0602459	0.787814	0.803893	-1.11449	0.385737	0.0025558	-0.000604573	-0.0350037	-0.0381534	-0.191767	-0.124185	-0.689582	-0.228308	0.600341	-0.218494
O14530	0.0437752	0.0406513	0.0752801	-0.0628511	0.0689535	0.048281	0.00216468	-0.0355752	-0.0899882	-0.0345097	-0.0176283	-0.084534	-0.0129356	0.0553017	0.00361472
P50402	-0.232986	-0.163187	-0.0690997	0.35953	-0.162868	-0.29718	-0.0192688	0.18714	0.123393	-0.0527962	0.184991	-0.00652158	0.0307361	-0.017152	0.135269
O75306	0.0620293	-0.307052	0.05239	0.359334	-0.266283	-0.108279	-0.0140503	0.0516363	-0.070849	-0.0110008	-0.0554684	0.247067	0.176423	-0.125872	0.00997499
P48444	-0.0536174	0.406973	0.0703771	-0.428883	0.190828	0.121742	0.00450969	-0.017792	-0.103545	-0.10533	0.087974	-0.348223	-0.0403644	0.316522	-0.101171
Q5BJH7	-0.0690543	0.0258892	-0.0775767	0.0653302	0.0330486	-0.0730843	-0.0674306	-0.00792821	0.000895189	0.102141	0.0721376	0.0941468	-0.0322398	-0.0719058	0.00563137
Q9H4A3	-0.228716	-0.0239181	0.0869371	0.106818	0.0306311	0.057926	0.0316307	0.108392	0.141581	-0.0320466	-0.0230226	-0.0833661	-0.231702	0.0172034	0.0416513
Q6KB66	-0.0217031	0.194469	-0.0265961	0.0739491	0.0621326	-0.00284448	0.0305753	0.0244391	-0.111671	-0.161624	-0.0080341	-0.032392	-0.084645	0.0610291	0.00291479
O76024	0.0155336	-0.18251	0.00551104	0.0573632	0.0230578	0.0665081	0.00600664	0.0605731	0.059931	0.0251136	0.0266032	0.0327093	-0.176264	-0.14793	0.127794
O15049	0.023736	-0.00626194	0.00233993	-0.0115933	0.0465011	0.0272535	-0.000380625	0.019242	0.113049	0.068268	0.0198653	-0.126562	-0.0500533	0.0231745	-0.148578
O43491	-0.0766419	-0.491554	0.290984	0.289513	0.00576293	-0.0737341	0.107812	0.0152712	0.0122157	-0.052775	0.079395	-0.235343	0.0561337	-0.0284227	0.101383
Q06265	-0.00926138	-0.167965	0.0520219	0.141744	0.0360921	-0.216558	0.0670282	0.123572	-0.0216365	-0.086008	0.108456	0.0453175	0.0124908	0.0103664	-0.0956602
P50213	-0.197448	-0.171152	0.00126972	0.0747903	-0.257359	-0.0607891	-0.0184552	-0.00614513	-0.0118362	0.0889841	0.233143	0.238344	0.266643	-0.224512	0.0445231
Q96K17	0.190197	0.0168809	-0.0359438	-0.173725	-0.00719499	0.0537747	-0.000355968	0.029124	0.043274	0.075524	0.0799406	-0.148574	-0.159171	0.101426	-0.0651755
P54868	-0.0701924	0.0248998	-0.0415944	-0.175579	-0.0169125	0.00990006	0.00810815	0.0438149	0.0282579	0.06608	0.0625246	0.0405965	0.0179712	-0.0757081	0.0778334
Q9NUL7	0.055864	-0.10655	0.0633246	0.0769038	-0.0307101	-0.0313783	0.00330276	-0.0891201	0.0531864	-0.0173548	0.178096	-0.0177263	-0.0508328	-0.0800666	-0.00693882
P20290	0.118787	0.195242	0.0959594	-0.220351	0.0852041	0.0529533	-0.0764298	0.0433375	-0.0115694	-0.0402793	0.108663	-0.238348	-0.108443	-0.0241572	0.0194319
Q06323	0.199756	0.537395	-0.181362	-0.183823	0.285366	-0.0311836	0.0500421	-0.043219	-0.125312	0.017332	-0.247308	-0.13822	-0.0926608	0.160117	-0.206921
O95833	0.232742	0.212264	-0.213823	-0.045986	0.146599	-0.0438299	0.00302086	-0.0127079	-0.0780612	-0.0512388	-0.26026	-0.0250061	-0.120981	0.225296	0.0319718
P09486	0.00145017	-0.414186	-0.455775	0.379399	-0.0060723	-0.0882004	0.0768881	0.0618928	0.128863	-0.094903	0.216458	0.0756607	0.178502	-0.161637	0.101659
Q92841	0.117168	-0.567993	0.138063	0.176494	-0.0766057	-0.0830285	-0.374599	-0.103566	-0.257452	-0.291548	0.762343	0.243566	0.426357	0.0920776	-0.201275
P30530	-0.101859	-0.136096	0.0312699	0.00256604	-0.00720447	0.0302731	-0.0343136	0.0365355	-0.144861	0.0922784	0.210715	0.0741838	0.105372	-0.143771	-0.0150889
Q15003	0.0087163	0.280904	0.0210122	-0.133824	0.140142	0.061664	0.0719705	-0.00952657	-0.0537137	-0.0394378	-0.183251	-0.191236	-0.091681	0.20692	-0.0886579
Q9GZL7	0.00883479	-0.0262069	-0.0197471	0.138192	0.0119705	0.0265231	0.0753627	-0.0524603	0.0604001	-0.164908	0.277383	-0.0287062	-0.14038	-0.117664	-0.0485924
Q13951	-0.130615	0.319443	-0.000112007	0.00472681	0.0455293	-0.0570244	-0.0302515	-0.0192069	0.00598478	-0.00153685	0.0124903	0.0240513	-0.00332237	-0.0577939	-0.112363
P11216	0.0332615	0.301687	0.0588423	-0.293437	0.183473	-0.00750988	-0.0475266	0.02153	-0.307033	-0.0603333	-0.0863	-0.0520559	0.0752503	0.203687	-0.023535
Q9NXG2	0.0143462	0.0593896	0.0185933	-0.0656917	0.0459131	0.0551306	0.0792175	0.0634116	0.0572741	0.0431207	-0.0865155	-0.194106	-0.136742	0.0823747	-0.0357155
Q04206	0.029183	0.0303144	0.0443378	-0.0829826	0.0687569	-0.0303719	0.0230953	0.00340618	0.0303839	0.0525227	-0.0800762	-0.0114545	-0.00838078	-0.0835079	0.0147736
P00966	-0.0325183	-0.00597328	0.122143	-0.0430277	0.127877	0.00551342	0.136946	0.0381112	0.0339877	-0.0382937	-0.0276313	-0.0660505	-0.356794	-0.0175902	0.1233
P78406	0.0595526	0.0578022	-0.201665	0.0984556	-0.193492	-0.00784238	-0.0781689	-0.0263193	0.0870177	0.0337039	0.207777	-0.0223712	0.0479062	-0.064612	0.00225555
Q9NUI1	0.126511	-0.0212468	-0.169076	0.323512	-0.214863	0.0108655	0.0258114	-0.115546	0.0070377	-0.0393988	-0.256071	0.0659459	0.0708366	0.0521058	0.133577
P41223	-0.0514353	-0.241641	-0.0874669	0.100295	3.1313e-05	-0.0240844	0.0787906	0.0650075	-0.0651301	-0.0579309	0.0127912	0.0936335	0.0932746	0.0647979	0.0190665
Q9UHG3	0.17205	-0.196504	-0.265119	0.237774	-0.0654117	0.052828	0.000260187	-0.113428	-0.0372161	0.0201666	-0.0565546	0.0340465	0.135384	-0.00108728	0.0828102
Q86U42	-0.00360808	-0.127358	-0.0625329	0.370989	-0.123274	-0.0555666	-0.000894491	-0.058762	-0.0286524	-0.1272	0.0771446	0.128966	0.189214	0.0024081	-0.180874
P17174	0.0954524	0.204857	0.00260353	-0.294129	0.186482	-0.0959438	0.0809892	-0.108285	0.142501	-0.0257218	0.0411548	-0.170529	0.0162759	-0.0946897	0.018981
P30536	0.164098	0.0636488	0.203008	0.14755	-0.0859172	-0.109214	-0.0856816	-0.113105	-0.247798	-0.1825	0.0392313	0.0191639	0.150563	0.029802	0.00715133
P29317	-0.163473	0.114328	0.0517548	-0.0226394	-0.0999461	0.0613341	-0.0426983	-0.0172899	-0.0357994	-0.0200086	0.021656	-0.00724094	0.172024	-0.0496132	0.0376109
Q9BRR6	0.0898554	-0.0521524	-0.0552899	0.166945	-0.00310042	-0.0713023	0.00405064	-0.12985	0.0298944	-0.0436901	0.00144363	0.0531881	0.065863	-0.0921176	0.0362628
O15460	0.0294693	-0.102436	-0.0862202	0.105564	-0.0231478	0.0489378	-0.0581634	-0.0297391	0.0109044	0.0415383	-0.0327246	0.121037	0.0805865	-0.064914	-0.040692
Q9BYD1	-0.118194	-0.454159	0.0847219	0.139061	0.0270264	0.0565227	-0.0198087	-0.014203	-0.00164849	0.0420739	-0.0471216	0.223521	0.225813	-0.0974631	-0.0461426
Q8IYB3	-0.0104847	-0.0671266	-0.053581	-0.0563783	-0.0202857	0.147013	-0.129876	0.030308	0.0333278	0.0821498	0.146147	-0.212215	-0.00304364	0.0432879	0.0707575
Q9H1B7	0.126833	0.0806474	-0.0747919	-0.0886841	-0.0329216	0.0223906	-0.0533704	-0.0730225	0.017042	-0.123173	0.0524182	0.0270662	0.0500184	0.0833434	-0.0137953
P07384	0.0722771	0.416669	-0.378385	-0.523434	0.329315	0.24689	0.153603	0.0199524	-0.0165473	0.129969	-0.329109	0.0350431	-0.190057	0.194971	-0.161156
Q9HC36	-0.0359429	0.00760433	0.0144908	0.382226	-0.147738	-0.0299574	-0.0299129	-0.0338858	-0.0184935	-0.00141272	0.0974745	0.071955	-0.00569933	-0.155418	-0.115289
Q9Y676	-0.0614539	-0.0866204	0.113567	0.00865136	0.041701	0.0742111	0.0761553	-0.0350551	0.00694205	0.146714	0.0330644	-0.0492652	-0.0280632	-0.269302	0.0287532
Q9H0E9	0.00936828	0.00828841	-0.00693551	-0.096326	0.0192772	-0.046434	0.00255519	0.0300275	0.0167975	-0.0112469	0.0155592	0.0659416	-0.0507091	0.0376535	0.00618322
P23193	0.018599	0.241466	0.0357329	-0.21595	0.127338	-0.00225551	0.028887	-0.0314012	0.0515527	-0.00852356	-0.0841352	-0.152563	-0.110839	0.168172	-0.0660803
P08779	-0.165914	2.21902	-0.093686	-0.202816	-0.143505	-0.118679	-0.127977	-0.141877	-0.177047	-0.11836	-0.180295	-0.227685	-0.158877	-0.18222	-0.180084
Q9NYY8	0.107286	-0.0510552	0.142151	-0.0517629	-0.171553	-0.139319	-0.00691609	-0.0381158	-0.110638	-0.00257397	0.289258	0.0519893	0.0880544	-0.070007	-0.036798
Q9BYC8	-0.00725834	-0.136899	-0.0272512	0.0489239	0.00643996	0.0379643	-0.0253388	0.00501498	0.00716263	0.0845011	0.00265015	-0.0461602	-0.000409057	-0.00824723	0.0589068
Q9UGP8	-0.163376	-0.225981	0.0884958	0.165563	0.0295501	0.00791034	-0.0516008	0.0130348	-0.259379	0.243572	0.179587	0.130101	-0.106376	-0.0332745	-0.0178284
P30086	-0.104045	0.406197	-0.261912	-0.366779	0.28188	0.00885612	-0.0246685	0.0485914	0.0237246	0.0967621	-0.133687	-0.0887348	-0.0848138	0.169763	0.0288646
Q9NQH7	-0.0282821	0.00552597	-0.0160714	0.0278647	-0.0228225	0.0161748	0.00631379	0.0502734	-0.0141812	0.0471774	-0.0541589	0.0108551	0.0579665	-0.0414015	-0.0452342
Q8WW59	-0.0771727	-0.0978561	0.138325	0.0878295	0.103093	-0.137688	0.0420921	0.0589721	0.132553	-0.013283	-0.0495349	-0.0945598	-0.10386	-0.206179	0.217268
Q13685	-0.0419534	0.0900579	-0.00243989	0.244971	0.00474023	-0.055187	-0.020843	-0.0169871	-0.0308457	-0.0441779	-0.0427437	0.105174	-0.118181	-0.0254654	-0.0461184
Q93096	-0.0799578	-0.115047	0.00289433	0.0675233	-0.0928457	0.0446572	0.0330893	0.0226472	0.0167406	0.0293164	0.000176902	0.0179509	0.0206949	0.00178907	0.0303704
Q9H4K7	-0.0411177	-0.0312896	-0.0503134	-0.0101978	0.0167663	0.0183625	0.0260782	0.00176494	0.0359447	-0.0118543	0.0257955	-0.00306804	0.00931277	-0.0138684	0.0276844
Q92820	0.0411298	-0.0658412	-0.00716758	0.167037	-0.0308975	-0.0104658	-0.169775	-0.0166659	0.027906	-0.0467883	-0.132505	0.202551	0.0289591	-0.0190605	0.0315841
P26599	0.670393	-0.0912105	0.289176	0.316224	-0.444511	-0.4164	-0.433021	-0.487352	-0.509167	-0.128202	0.609157	0.261722	0.115184	0.183898	0.0641088
O95758	0.0671664	-0.0468555	-0.231519	-0.0172487	0.0626364	0.134173	-0.0751835	0.0930382	0.0972239	0.120717	-0.250014	0.0251664	-0.0566838	0.0322437	0.0451402
P30049	-0.208106	-0.236236	-0.0275475	0.364954	-0.0642279	0.0335123	0.102634	0.18682	0.0912777	0.14243	-0.129323	-0.0860603	-0.0106776	-0.138879	-0.0205699
A6NDG6	0.156646	-0.0122267	0.0247822	-0.0925135	0.190363	0.0470431	-0.124921	0.0144501	0.065494	-0.036847	-0.0785394	-0.187696	-0.0441448	0.0993556	-0.0212459
P24539	-0.198144	-0.456761	-0.0505493	0.594043	-0.0392983	0.114433	0.115139	0.0715344	0.10995	-0.0631774	0.0511449	-0.160552	-0.120014	-0.0823268	0.114579
Q99426	-0.100005	0.201959	-0.0446072	-0.10693	0.210468	0.0216344	0.0537866	0.0661987	0.127658	0.0257859	-0.224089	-0.155296	-0.106452	0.0559729	-0.0260834
Q9UKA9	0.0942451	0.0475961	-0.0449005	0.0180386	-0.0683779	0.103457	-0.0175659	-0.0258814	0.0547701	0.0984944	-0.078563	0.120186	-0.00758757	-0.240983	-0.0529268
P51149	0.1816	-0.266227	-0.25435	0.342119	-0.366232	0.080162	0.230601	0.237893	0.0392915	-0.359412	0.0802789	0.415798	0.304349	-0.525493	-0.140379
P14625	-0.267088	-1.36494	-0.0430506	1.37236	-0.453846	0.0736754	0.0857317	0.290088	0.0974965	0.157067	0.0959173	0.470337	0.175602	-0.572263	-0.117094
P46782	0.237035	0.275403	0.401539	-0.259511	0.2189	-0.076599	-0.140721	-0.130856	-0.235515	-0.0219338	0.545826	-0.67834	-0.272295	0.0873662	0.0497018
P20020	0.0846734	-0.0791333	-0.0933973	0.152653	-0.0649824	0.000779941	-0.0682095	-0.00607838	-0.0605293	0.0600163	-0.11903	0.129206	-0.00836093	-0.056186	0.128578
[truncated: 1,434 more rows]

## Sheet: Column legend
Uniprot accession number		Unique UniProt accession for quantified protein by SWATH (1% FDR).
DMSO	DMSO_Rep1	Normalized levels of expression of the proteins quantified by SWATH. Relative protein abundance was calculated and then normalized using the most likely ratio (MLR) normalization. DMSO group, with five replicates was used as control.
	DMSO_Rep2
	DMSO_Rep3
	DMSO_Rep4
	DMSO_Rep5
QC	QC_Rep1	Normalized levels of expression of the proteins quantified by SWATH. Relative protein abundance was calculated and then normalized using the most likely ratio (MLR) normalization. Each QC replicate is a pool of aliquots from all the samples; the QC group was used to evaluate CV% of the expression of each protein. Only proteins with CV% > 30% were retained.
	QC_Rep2
	QC_Rep3
	QC_Rep4
	QC_Rep5
VX-809	VX809_Rep1	Normalized levels of expression of the proteins quantified by SWATH. Relative protein abundance was calculated and then normalized using the most likely ratio (MLR) normalization.
	VX809_Rep2
	VX809_Rep3
	VX809_Rep4
	VX809_Rep5

## Sheet: MoversPresentInSWATHDataset
45 movers	Uniprot accession number - Expression	Common SWATH & LOPIT
E9PRY8		P26641
P26641	Q96JP5	P24534
P24534	P36578	Q12841
Q8WVP7	Q92945	Q8WVM0
Q12841	Q6SPF0	Q9Y3B7
Q8WVM0	O76031	O75616
Q9Y3B7	Q9BTD8	Q4G0N4
U3KQ69	Q9P258	Q5T440
Q969S9	Q9H3U1	Q96D53
Q96E29	O60518	Q96DV4
O75616	Q9Y2U8	Q8TAE8
Q4G0N4	Q9UPT8	Q96HY7
Q5T440	Q96L91	P82933
Q96D53	P52701	O75530
Q96DV4	Q9NRL3	Q9UBP9
Q8TAE8	Q96D53	Q8NFC6
Q96HY7	Q6P2E9	Q9UI09
P82933	Q9NQP4	Q9NVV4
F6WH68	Q96P70	Q02338
O75530	P21953	Q96C36
Q9UBP9	P30260	Q96GC5
Q92968	O15042	P12236
Q709F0	Q01780	Q9BQP7
B7Z2R7	P02786	Q96CU9
P05204	P07954	P82673
Q9UBD5	Q9Y490
Q8NFC6	O94826
A0A0A0MTH9	Q9H9Y2
Q96SB8	Q16555
Q15032	Q96S52
Q5SXM2	P23381
Q9UI09	P35221
P12235	Q96C19
Q9NVV4	Q8WVQ1
Q02338	Q15149
Q96C36	O14497
Q96GC5	Q9BQS8
P12236	P58107
Q8N983-4	P13807
Q9BQP7	P51970
Q96CU9	P08107
P82673	Q8TAE8
E9PEX6	Q14008
Q9NV66	P31948
Q9NVQ4	Q92574
	Q13423
	Q14203
	P0DMV9
	Q8WZA9
	O60716
	Q14498
	Q15042
	Q9NX63
	A5YKK6
	P26641
	P20810
	P31350
	Q16643
	P53618
	Q9NVA2
	Q9H2M9
	Q7Z5L9
	P30305
	P08559
	Q10570
	Q99733
	Q96RP9
	Q8N1S5
	Q9NVC6
	Q9UDW1
	P49006
	Q7KZF4
	P18206
	P19404
	O43837
	Q8N201
	Q9UBF2
	O00468
	P13995
	P49585
	P17858
	Q9H7E9
	O95336
	P55060
	O15269
	O95235
	Q8TDX7
	P02768
	Q01813
	Q99575
	Q53H12
	Q9UGR2
	P06753
	Q14980
	Q9UNF0
	Q9UBQ7
	P43304
	Q13586
	Q9NXH9
	P49916
	Q6P1J9
	P51452
	Q9Y277
	O43395
	Q86VP6
	P98194
	Q96ST3
	Q12888
	Q8NBX0
	Q13573
	Q96FQ6
	Q9H0R6
	O60701
	Q8NFC6
	P78362
	O95782
	Q15293
	O15382
	Q9UBV2
	P30038
	Q8IVT2
	P67809
	O15294
	Q96GM8
	P35251
	Q1ED39
	P12270
	P31327
	Q92616
	Q9Y2T2
	Q9NU22
	O75569
	Q8N163
	P35240
	Q8IZ83
	Q9H6S3
	Q14692
	Q12929
	P55263
	Q14554
	Q08211
	P06454
	Q9UQ90
	Q01995
	Q7Z460
	Q9Y617
	P20962
	P11586
	P29966
	Q1KMD3
	Q13751
	Q9UHB6
	O95425
	Q52LJ0
	Q9NW13
	P40818
	Q16706
	Q92614
	Q9HCS7
	Q15020
	O75348
	P17568
	Q9UHV9
	O94906
	Q86Y79
	Q9NR33
	P35232
	P55196
	O15020
	O75717
	Q08379
	Q86TM6
	P33176
	O60524
	Q9C0C2
	Q9UHD8
	Q00610
	P49327
	Q9H4A4
	O76021
	P35606
	Q14676
	P53985
	Q9BY42
	Q9P032
	Q9GZS1
	P55809
	P56192
	P52272
	Q4KMQ1
	Q7Z4V5
	Q13045
	O60306
	P27708
	P31483
	Q15006
	P62258
	P49257
	Q969H8
	P50851
	Q8IWA0
	O00273
	P35908
	Q9UQ35
	P31040
	Q08380
	Q5JTZ9
	Q8WUM0
	P04406
	O95104
	Q8WX93
	Q86XP3
	Q13123
	Q96CT7
	Q9UKD2
	P19623
	P26006
	Q92925
	Q562E7
	Q9P2R3
	O75175
	P46379
	Q9NSD9
	P52758
	Q9Y315
	Q86UP2
	P09758
	P56545
	Q9Y5K8
	P22102
	P56182
	Q9H4A6
	Q92499
	P46926
	Q8IYS2
	Q8N1G4
	P28838
	Q99459
	P62424
	P07237
	O75533
	Q9BW92
	Q13459
	O75446
	Q15785
	P27694
	O75369
	Q9BZE9
	Q9Y520
	Q5T653
	Q8N5M9
	P10586
	Q14974
	P05386
	Q9Y230
	P33316
	Q9H9Y6
	Q9H444
	Q8TEX9
	Q15021
	O43795
	Q9UQ80
	P78371
	P61764
	Q5SRE5
	Q2TAY7
	Q96PK6
	Q96RK0
	Q8TEW0
	P24821
	Q92804
	P35637
	Q9UHB9
	P11388
	P07741
	P13569
	Q15075
	Q9P2E9
	Q6YHU6
	O14744
	Q96I25
	O60645
	Q96DI7
	Q9NTJ3
	P22234
	P61970
	Q7Z417
	P19338
	P62913
	P02765
	Q69YQ0
	P15144
	Q9HC35
	Q9H1K1
	P24941
	O00151
	Q8IVF2
	Q9Y240
	O43747
	P54920
	Q8NFW8
	P11766
	P34897
	Q12788
	Q92879
	P52815
	P08727
	Q96FS4
	Q92922
	P12081
	Q9H0D6
	Q9NRV9
	P09601
	Q92797
	Q14168
	Q5M775
	O75643
	Q12872
	Q15024
	P41227
	Q9UKF6
	Q96EV2
	Q13813
	P78346
	Q9H8H0
	P07814
	Q9Y5B9
	Q99959
	Q9P287
	Q3ZAQ7
	Q8WVV9
	O95602
	Q13217
	O95490
	Q7Z6Z7
	O75390
	O00139
	P62851
	O96013
	Q13625
	Q6NXE6
	P53041
	P62910
	Q9UNQ2
	P42765
	P78527
	O95831
	Q04637
	Q13362
	Q07954
	Q9UIA9
	Q14978
	P61201
	Q6Y7W6
	P55084
	P05187
	Q9BUE6
	Q9H6S0
	Q9BUF5
	Q8TAA9
	P54886
	A1L0T0
	Q14534
	P02792
	Q16891
	P35222
	O60725
	Q96G03
	P14923
	Q9BTW9
	Q8NE71
	Q9NYL9
	O60449
	Q86V48
	P25787
	P06239
	P05062
	Q8WXI9
	P46063
	P08574
	Q9BV44
	Q8IY81
	Q9Y4L1
	P50750
	Q9Y6E0
	Q5JWF2
	P07948
	O75489
	P17676
	Q86Y37
	Q8NF37
	Q9UKV3
	Q96GQ7
	Q9Y639
	Q96TA1
	Q92947
	Q15181
	Q15233
	P35658
	Q92610
	Q5T6F2
	Q7L2J0
	P38435
	O75694
	Q96CF2
	O95817
	P18583
	Q9NR12
	P37837
	P08651
	P62995
	O75351
	P04075
	Q9Y2D5
	Q9NW08
	Q5JTH9
	Q13952
	P04040
	Q2TB90
	P19367
	P52789
	Q9UKU7
	P09622
	Q9NZL4
	Q969V3
	Q13488
	P07942
	P48729
	Q96A26
	P35914
	Q8TDY2
	P46459
	Q15642
	Q96I24
	P01023
	Q9NR56
	Q9NZT2
	Q03252
	O00116
	O75367
	O00154
	Q96HY6
	Q9BSJ2
	Q16787
	O14976
	P13861
	Q96JM3
	P85037
	P09525
	Q96CM8
	P26640
	Q12959
	Q8TEQ6
	P23588
	A8MXV4
	Q92538
	Q08378
	Q96N66
	P11182
	O14521
	P52948
	Q27J81
	A2RRP1
	Q02880
	Q9UHL4
	P51948
	Q9NZM1
	O15127
	Q8TBA6
	Q9Y446
	O95071
	Q9H269
	O60885
	Q14126
	Q9Y3F4
	Q96B36
	Q9UJA5
	Q15084
	Q13263
	Q8WUF5
	Q6WCQ1
	Q9HCC0
	Q02952
	Q53GS7
	Q9Y4I1
	P50454
	Q14683
	P57740
	P08708
	Q6PD74
	Q13895
	Q96GG9
	P13667
	P80303
	Q9NR77
	Q86X29
	Q14204
	P13611
	Q8N128
	Q9BXK5
	Q15436
	Q96BP3
	Q9BQ39
	Q15582
	Q6Y1H2
	P07910
	P22314
	Q9Y3T9
	O75152
	Q96F86
	P13804
	Q13155
	P31153
	Q92599
	P36957
	Q5VTR2
	P10809
	Q5T1M5
	P49321
	P49247
	Q99460
	Q9P2M7
	Q01844
	Q29RF7
	Q8WUM4
	Q9BTC0
	Q86V81
	Q9NR30
	P40926
	Q6P9B9
	Q9UKM9
	Q13435
	Q8TDD1
	Q9BZE4
	Q6P2Q9
	Q8N8S7
	Q7L8L6
	P06733
	P00558
	Q9UMY1
	P22033
	Q7Z3T8
	Q9NP81
	P00390
	Q8NFQ8
	Q15125
	P35611
	O43895
	P01024
	P02751
	P24752
	P51659
	P11310
	P69905
	O75955
	O15498
	P02545
	P51649
	O60437
	P05141
	O00186
	P49821
	Q12873
	Q14839
	P04083
	P08237
	Q14019
	P22695
	P54136
	P30419
	Q8NBJ5
	Q9Y6Y8
	P51610
	P62873
	Q96QK1
	Q99683
	O00469
	Q9UJV9
	P48449
	P05156
	A0FGR8
	Q14573
	P22415
	P36915
	Q92878
	Q8IYI6
	Q92896
	Q9BTC8
	Q6PD62
	Q14847
	Q9H9P8
	Q9Y5J1
	P55789
	P00533
	P62879
	Q99536
	P09382
	P49903
	O14964
	P15924
	P55769
	O43156
	P29144
	A0AVT1
	Q14690
	Q6YN16
	Q9H0B6
	Q86VI3
	P53801
	P36952
	P35998
	P12814
	O43707
	P63272
	Q8WUA2
	Q9BZH6
	Q9BW27
	Q9Y4D8
	Q9BQ67
	Q8IZL8
	P11047
	Q8NHP8
	P11717
	Q14146
	P15927
	Q68E01
	Q9Y4A5
	P26358
	P61247
	Q14919
	Q96I99
	Q9NQR4
	Q99797
	Q2M1P5
	P11498
	Q15067
	P49368
	Q14669
	Q6KC79
	P49915
	A6NHR9
	O15067
	P00491
	P61962
	Q9Y2K7
	Q9BWS9
	P05023
	O95373
	Q9Y618
	P23396
	P61163
	Q9H8Y8
	O94905
	Q13409
	P08758
	O75477
	O14936
	Q9Y657
	Q567U6
	Q8WYJ6
	Q6NYC1
	Q9BQ52
	Q96HS1
	O95433
	P49411
	P42704
	Q8WXH0
	O75843
	Q8IY37
	Q15262
	P22307
	Q9H6R4
	O95202
	P00441
	O43290
	O75821
	Q96C86
	Q15370
	Q9P2B2
	P61421
	Q9Y3Z3
	P48739
	Q06830
	Q13232
	Q6UX04
	P46939
	P25786
	O00499
	P53396
	P14868
	O95573
	P61803
	Q9NX40
	P35237
	Q9NQW6
	Q14318
	O94832
	P35579
	Q07157
	P52788
	Q8TD16
	Q9NRF8
	Q96A35
	P63220
	P25705
	Q8N766
	Q6YHK3
	Q13308
	Q13445
	O14548
	Q92692
	O94888
	P62241
	P62333
	P08865
	Q5VW32
	O14734
	Q09666
	Q13439
	P05198
	P61221
	Q53H82
	P36542
	Q9H074
	Q13418
	P50914
	Q9Y487
	Q9NUJ1
	Q13740
	P06748
	P06576
	P13984
	P51688
	P68036
	P61106
	Q15031
	Q04695
	P02533
	P13645
	O75691
	Q99523
	Q9H2W6
	P99999
	Q8WUA4
	Q92888
	Q7Z406
	P08195
	Q9H089
	Q9BQG0
	Q8IXI1
	P31930
	O75165
	Q9NX62
	Q9NSE4
	Q06481
	P35580
	P26639
	Q9Y6D9
	Q9NZN4
	P40939
	O75027
	P36871
	O00159
	P17301
	Q8TAQ2
	Q9NX24
	Q9UBT2
	Q9NVM9
	Q86VM9
	O60292
	Q3SY69
	O75891
	P46199
	Q92696
	Q15014
	P52434
	Q8NI27
	Q9H223
	P62263
	O60841
	P31937
	Q9UKS6
	O75116
	O15027
	Q86UU0
	Q9NXE4
	Q8N1G2
	Q53F19
	Q92900
	P08582
	P49959
	P43686
	Q15019
	Q16181
	Q9UKX7
	O43493
	P84090
	Q9H9B1
	Q15059
	O00214
	O14776
	P46013
	Q08945
	Q8IY17
	Q92542
	Q9Y6E2
	Q8IXM2
	Q9UDY2
	P08243
	O43633
	P18858
	Q969G3
	O60220
	Q5T8P6
	P08729
	Q16512
	Q9GZR7
	P04264
	P05787
	O95340
	P25686
	Q6L8Q7
	P21333
	Q99470
	P82933
	Q9NVT9
	Q9H583
	P23229
	Q8TEM1
	P00505
	P08514
	Q9UBE0
	Q02790
	P19105
	P56937
	Q14566
	P28340
	Q9BUJ2
	Q15257
	P48163
	O75153
	P04818
	Q6ISB3
	O75347
	O75147
	P07355
	P19823
	P49792
	P15880
	Q9BSJ8
	P12004
	Q9Y6G9
	Q13268
	Q02241
	P05556
	Q9HBH5
	Q13033
	Q14789
	O15031
	O75683
	Q13428
	P27824
	P11234
	P13674
	Q9UJU6
	Q9UQE7
	Q14738
	Q9NRX1
	P49588
	Q8IXI2
	P17480
	Q04323
	P09110
	Q14257
	O00429
	Q96TC7
	P62993
	Q587I9
	P67936
	Q86XL3
	P11387
	Q8NBN3
	Q9BYN8
	Q8IU81
	P52565
	Q9Y2W1
	Q96B26
	Q8IWS0
	Q6UN15
	O60307
	Q9UBB4
	P16219
	Q00839
	P18433
	Q9BX68
	Q8WWM7
	Q0VD83
	P10645
	Q9NVI7
	P14735
	P14618
	Q9NZB2
	P14854
	P29590
	P20700
	Q01082
	O95394
	Q9UH99
	Q14315
	Q6UB35
	Q99805
	Q13151
	Q9BXP5
	O14578
	P33991
	Q96SB4
	P24928
	Q9H993
	P41250
	P31939
	Q14697
	Q9BUL8
	Q9NQ29
	Q13200
	Q12797
	P23246
	Q8WXF1
	Q13523
	Q9Y3X0
	P22223
	Q3KQU3
	Q9BYT8
	Q13907
	Q9UNQ0
	Q9HB71
	Q12981
	P05455
	Q8TF05
	Q9UI10
	P02647
	Q6WKZ4
	O00231
	P33121
	Q14247
	P42566
	Q9UPN3
	Q8WZ82
	Q02252
	O60610
	Q9HBR0
	Q9HD20
	Q8IX01
	P50440
	P17275
	P59998
	Q5JSL3
	Q9Y6M5
	P48634
	Q9NXH8
	Q92544
	O94992
	Q15404
	Q8IXT5
	P51572
	P30519
	P41252
	P61158
	O15427
	P55884
	O95777
	Q9P206
	Q9UHD1
	Q12906
	P63244
	Q6IA69
	Q86YP4
	P09874
	Q8NC56
	Q15050
	Q96DV4
	Q02218
	Q9UJZ1
	Q9NXF1
	Q9H1E5
	Q96DB5
	P11233
	P15311
	Q9Y383
	Q99661
	Q9NQC3
	Q9H2U1
	Q15437
	P34932
	P13798
	Q13126
	P22830
	P13797
	Q13098
	P10768
	Q9BTA9
	Q96EE3
	Q9UNP9
	Q92917
	Q8TBC4
	Q8TAT6
	P27216
	P42167
	Q15393
	Q7L1Q6
	P09972
	O95757
	Q9P2K5
	P60842
	P40429
	Q9H3K2
	Q13769
	Q8IZ07
	Q9H6F5
	Q9NRN7
	O60488
	Q00059
	Q9BZF9
	Q9BZG1
	O75962
	P30084
	P35241
	Q14160
	P48643
	P50991
	Q13148
	P41247
	Q9BXJ9
	Q9H2U2
	Q5VZE5
	Q14166
	Q15365
	Q15366
	Q6NVY1
	P54577
	Q8N1F7
	Q9Y3D9
	O96000
	Q9H3G5
	O14908
	P62316
	P78560
	Q96S66
	Q9Y2H6
	O75937
	Q9NTK5
	P55072
	O43818
	P42892
	O43929
	P21589
	P25788
	Q5VZK9
	P49189
	O95470
	P55786
	P08581
	Q6ZRP7
	P32004
	Q13363
	Q96FW1
	P25325
	P06493
	Q13620
	P84103
	Q15738
	Q9UIG0
	P17987
	O95864
	Q00341
	Q9H3P7
	P23634
	Q9UIJ7
	P47897
	Q7Z2K6
	Q15029
	Q9Y4P3
	Q9NYK5
	Q14152
	P05388
	P09211
	Q12931
	Q9H7Z7
	P78344
	Q9H3M7
	P29372
	P49207
	Q8WWC4
	Q9H6V9
	Q8IV08
	P36776
	Q96S44
	P61026
	P39023
	Q9H5V8
	O95983
	P26440
	Q92598
	P51809
	P46060
	Q658P3
	Q9Y619
	Q9UQB8
	P35270
	O43813
	O95372
	Q969N2
	P38432
	Q96PC5
	Q9H814
	P15586
	O00115
	Q9H0U9
	P30048
	P13010
	Q96AY4
	P61619
	O60506
	Q5JRX3
	P11279
	Q9UN86
	Q14938
	Q16629
	Q15269
	Q12923
	P61599
	Q96KB5
	O60925
	Q9UNZ2
	P16615
	P09543
	P12955
	Q9UEY8
	O00442
	Q07021
	P48147
	Q9NRW7
	Q9H4B7
	Q9NS86
	Q9HAU5
	Q5SWX8
	Q96LJ7
	Q9UL46
	O75718
	Q8WUY1
	P04181
	Q16270
	Q5T440
	Q8WW12
	P50895
	Q96C57
	Q92974
	Q01518
	Q9BVL4
	Q9BUP3
	P61011
	Q13641
	Q96AY3
	O95865
	Q9NWH9
	O15230
	P06396
	P53350
	P28065
	Q9Y2J2
	Q9UJW0
	P08648
	Q9NX00
	P16278
	P08240
	Q9BY50
	Q9Y678
	O43396
	Q99519
	Q9Y6K5
	Q9Y6R7
	Q7Z401
	Q8NCH0
	Q16836
	P21912
	P51858
	P12956
	Q9Y3E1
	Q00403
	Q9Y320
	O15321
	O15514
	Q9BR76
	P16989
	Q13501
	Q9H2J4
	O00541
	Q8TD30
	Q5T7N2
	Q02878
	P62269
	Q9BXR0
	Q9UJ70
	P12429
	Q9NZW5
	Q08J23
	Q9H9Q2
	Q5VYK3
	P51784
	Q9UDX5
	Q12962
	Q14966
	Q9NVH1
	Q93009
	O43709
	Q9H0A0
	Q9P273
	Q32MZ4
	Q9Y2Q9
	Q9HAV4
	Q13637
	Q6IQ22
	Q9P0M6
	Q07020
	P09467
	Q92522
	P20618
	Q6ZSZ5
	P16403
	O75607
	Q6P1X6
	Q9BQA9
	Q9BWD1
	O94966
	P10301
	Q9Y2Z4
	Q96EY7
	O43172
	P12109
	P09669
	Q7Z4Q2
	P13639
	Q99497
	P33993
	P23526
	Q13616
	P78347
	P33992
	P49736
	Q99808
	P62906
	Q9UJS0
	Q9BWU0
	Q96PD2
	Q9Y3B7
	O60832
	Q86SK9
	Q8WWA1
	P49748
	Q9NWT8
	O14745
	Q9NY33
	Q9P0U4
	P23786
	Q9Y5J7
	P22570
	Q8IX12
	Q92979
	Q96PD5
	Q5RKV6
	Q14651
	Q9UKN8
	Q6DT37
	P13987
	O43464
	Q15388
	O43826
	Q8NHH9
	Q02817
	O75947
	Q9BRJ2
	P34896
	Q9Y2Q3
	P40227
	P50416
	P18124
	Q13619
	P35268
	Q8WVM0
	Q6ZRV2
	Q9H910
	P18887
	Q96IX5
	Q14684
	Q6NYC8
	P20674
	Q96EY8
	P12931
	P52209
	Q99439
	Q9UJX3
	P54725
	Q14161
	P09923
	Q15417
	P35900
	Q9Y696
	P31431
	Q8TCJ2
	Q99755
	P49790
	Q92882
	Q9P0S9
	A3KMH1
	Q15645
	P48735
	O43175
	P07996
	Q96G23
	P06756
	P10644
	Q12769
	Q16698
	P12532
	P12277
	Q9P2K2
	Q9Y224
	O75340
	Q8N7H5
	Q12789
	P36551
	P30876
	Q13330
	Q9BWM7
	Q05193
	O95140
	O96019
	P10253
	Q63ZY3
	Q96KR1
	P51116
	P55265
	P46777
	Q9BQA1
	O00170
	P48681
	Q6NZI2
	P41743
	Q05048
	O75083
	O60508
	Q14728
	Q9HCU5
	P50990
	Q92747
	Q9UMS4
	P13073
	Q9UNE7
	Q9BXS5
	Q9Y6Q5
	Q15102
	Q92973
	Q9BSH5
	P18077
	Q9HCE1
	P30520
	P62266
	Q6UVK1
	P98175
	Q5T0W9
	P50995
	Q9H078
	Q96CS3
	Q66GS9
	Q9BQ61
	O00461
	Q03519
	O00161
	O00743
	P60510
	Q02543
	Q9UER7
	Q96I51
	Q69YN4
	Q7Z3C6
	P49005
	Q16851
	O60216
	P26232
	Q53GS9
	Q8IXB1
	Q8TAA5
	Q96GA3
	P10155
	Q96M27
	O95861
	Q7KZ85
	Q9BZJ0
	Q9UKV8
	P40925
	O43765
	Q8N3U4
	Q8WVM7
	Q6PI48
	P49590
	P62191
	O43390
	Q96SI9
	O14672
	Q16822
	O00425
	Q9H6T3
	Q15424
	Q9Y2L1
	P51532
	Q9BXW9
	Q4G0J3
	P48637
	O76094
	Q15435
	Q96T23
	O75223
	P56377
	P61966
	P0CG08
	Q8WX92
	Q9BY44
	Q9NZI8
	Q9Y6M1
	Q86X76
	Q9Y5Q9
	Q9BPX3
	Q9GZP9
	O14657
	Q9ULV4
	Q7L2E3
	Q16576
	P07339
	O15355
	P49750
	Q15035
	P15121
	Q13042
	P52292
	P42285
	P28066
	Q8IY67
	Q9Y697
	O00410
	P08962
	Q9Y5L0
	Q16678
	P28070
	P21926
	O14980
	O75976
	Q12765
	P62081
	Q6YP21
	P82675
	P37268
	P21980
	P09496
	P02794
	Q9BVP2
	Q99832
	Q96E39
	P38159
	Q8WWK9
	P25205
	O00567
	P49023
	P09038
	Q9BTY2
	P61923
	Q8WYP5
	P09960
	Q12904
	P40763
	P40616
	P00387
	Q9Y263
	Q15363
	P08133
	P51114
	Q8NFV4
	Q07960
	P60900
	Q14157
	Q9NY93
	Q68CP9
	Q16513
	Q08752
	Q13472
	Q9UHX1
	Q68CQ4
	Q92520
	Q9H0E2
	Q71UI9
	O15228
	O43242
	Q99614
	Q9BT78
	Q5TCX8
	Q6PJT7
	P30153
	Q8N684
	Q16630
	Q12996
	Q14181
	Q9Y2R4
	P35249
	P83731
	P14866
	P51636
	Q9NYU2
	Q9BUB7
	O15066
	Q13112
	P62487
	Q9Y5M8
	Q08426
	P98164
	P19793
	O43324
	Q03701
	P04179
	O00232
	P40938
	Q93050
	P21964
	P28074
	O75150
	P35269
	P38646
	Q13442
	Q99623
	Q99798
	P54687
	O75844
	Q96AC1
	P47914
	P26373
	Q9C0E8
	Q14139
	Q2NL82
	Q00796
	P38606
	P49756
	O75882
	Q14BN4
	P13489
	Q00765
	O15327
	Q9UBC2
	P11021
	Q9UBU9
	Q15459
	Q6P9B6
	P04080
	O94973
	P27797
	P23368
	P24666
	P34931
	P16401
	P31946
	P63104
	P27348
	Q9Y324
	O75874
	Q15185
	P02774
	P62888
	Q02818
	O60313
	Q86SF2
	P16422
	Q8IY95
	P40855
	P00367
	Q9NT62
	Q10713
	Q07065
	P27635
	Q9Y5K6
	P05362
	O75521
	Q9H9B4
	Q9UMX5
	P39019
	O15511
	Q01650
	Q96GK7
	Q9HAV7
	P52888
	O75923
	Q9BQE5
	P61225
	Q15382
	O15213
	Q8WVX9
	Q4G176
	Q8WXA9
	Q6PL18
	Q8TCG1
	P12268
	Q96PU4
	Q96T88
	Q96A65
	Q9NZ43
	Q8NEW0
	Q8NBS9
	Q8WU76
	P20933
	Q16763
	Q6DD88
	Q8N490
	Q9BPX5
	Q9NPD3
	Q9GZX9
	Q8N0U8
	P49589
	Q9BQB6
	Q8IY18
	Q96HR9
	O94776
	O60831
	Q9Y3B8
	P53621
	Q06210
	Q13247
	P28482
	Q9NZ08
	Q49A26
	Q8NCG7
	Q9HCD5
	P01137
	Q6NUQ4
	P22061
	P19784
	P49137
	Q16352
	Q96GW9
	Q86Z20
	Q6IN85
	P17655
	O95347
	Q8N3X1
	P42166
	P42695
	Q16881
	P17812
	P16144
	O75400
	P43246
	Q7L014
	Q9BSH4
	P50748
	Q9P2D3
	O43678
	Q9BXY0
	Q9Y2Z0
	Q9NR45
	Q9BQP7
	Q96AQ6
	P46940
	O95479
	Q9Y265
	Q9BVI4
	P43897
	O43809
	P46108
	Q9H857
	O43264
	Q6IQ49
	P54727
	Q8NFF5
	Q8NI36
	Q5TC12
	O43615
	Q15646
	Q8WUP2
	Q15942
	P27695
	P42785
	Q9UBB6
	Q9GZQ8
	P26572
	O15533
	Q969S3
	Q9HC38
	Q8IWT6
	Q86W92
	O14579
	Q16401
	Q70J99
	Q9P2R7
	Q92530
	O75608
	Q9Y5X3
	Q8IZP0
	Q9H3P2
	Q9ULK4
	Q68BL7
	Q9NXX6
	Q9HC21
	Q8N2F6
	Q6P1L8
	Q9UH62
	Q05519
	P19388
	P56378
	Q9BVL2
	Q7L2H7
	O00203
	O60248
	P16152
	O00299
	Q5C9Z4
	Q9H3U5
	P57088
	Q9NYH9
	Q14258
	O15372
	Q5VT52
	P42771
	Q96EK5
	Q9BY32
	Q7Z589
	P40222
	Q86UT6
	Q16775
	P35250
	O15164
	Q9NPQ8
	Q15043
	Q9P0J1
	Q6IAN0
	P06280
	P06865
	Q96T60
	Q13426
	Q9NRG1
	Q9NY61
	Q14807
	O95870
	O43776
	Q13601
	Q4G0N4
	O60318
	P14635
	Q6IAA8
	P40937
	P10619
	Q7L576
	P55010
	Q9H330
	Q8WWQ0
	P30044
	Q9NQS7
	Q9H6W3
	Q6ZXV5
	P27816
	Q16740
	Q5SSJ5
	Q9ULW0
	Q6VMQ6
	P04637
	Q96DZ1
	Q7Z2Z2
	O43488
	Q8NF91
	Q96P16
	Q9NQG5
	Q9NZD4
	Q9UJ83
	P50897
	P63010
	P11802
	Q14C86
	P04062
	O43663
	Q9H061
	P43155
	Q14CX7
	Q9H8H2
	Q13618
	Q9Y5X1
	Q92552
	Q10567
	Q3SXM5
	Q96ST2
	P52298
	P61978
	Q9Y3U8
	O60678
	O60443
	P28331
	Q9P246
	Q9Y314
	P16070
	Q9H6Z4
	P22626
	Q8NEJ9
	P62937
	Q9HD42
	Q9UNM6
	Q8WVM8
	P30626
	Q9UBQ5
	O94919
	P04843
	Q13617
	P07437
	P62249
	Q9Y2B0
	Q9HB07
	Q96KQ7
	Q9NPA8
	P16435
	Q9NX46
	Q16531
	O95182
	Q16762
	O43143
	Q9BV79
	Q14344
	P43243
	P13928
	Q9Y2S7
	Q15154
	Q14691
	Q9UNS2
	Q8TCS8
	Q92621
	Q03135
	Q14289
	Q9HCN8
	Q9Y3C4
	Q6UY14
	P17980
	O14656
	Q9Y6X9
	P78330
	P04899
	Q9Y4W2
	P82930
	Q9NZ45
	Q16543
	Q13438
	Q9NQ50
	Q9UG63
	Q9H0E3
	Q15369
	P26045
	P98179
	P48059
	P26368
	Q9NRR5
	Q8N4Q1
	P20073
	Q5JRA6
	Q9BVG4
	Q16186
	P82932
	O43913
	Q14571
	Q96RQ3
	Q9Y6I3
	Q9ULU4
	P54819
	Q13206
	P30837
	Q9Y6M9
	Q13547
	P29992
	P52735
	Q96TA2
	P40121
	Q9NVP1
	P22087
	Q9NTW7
	Q8NBL1
	O43823
	Q99570
	Q06787
	Q9H788
	Q9UJX5
	Q9BQI0
	Q8NEU8
	Q86SQ0
	Q9P2J5
	P61006
	Q9Y5Q8
	Q99873
	O00330
	Q9UIQ6
	Q9Y312
	Q9BZF1
	O75396
	Q96HC4
	Q09161
	Q13595
	Q00325
	Q96DM3
	Q9Y4C8
	P47895
	O75787
	O00560
	Q8NBM8
	Q13724
	O00233
	P21399
	Q9BZL6
	P28799
	Q8NBN7
	Q92620
	Q9UKB1
	Q9Y3E5
	O75695
	Q9NX18
	Q3ZCQ8
	Q9NPY3
	Q8N5I2
	P43121
	Q5QJE6
	P52566
	O43719
	P49721
	Q96CD0
	P07900
	O14530
	P50402
	O75306
	P48444
	Q5BJH7
	Q9H4A3
	Q6KB66
	O76024
	O15049
	O43491
	Q06265
	P50213
	Q96K17
	P54868
	Q9NUL7
	P20290
	Q06323
	O95833
	P09486
	Q92841
	P30530
	Q15003
	Q9GZL7
	Q13951
	P11216
	Q9NXG2
	Q04206
	P00966
	P78406
	Q9NUI1
	P41223
	Q9UHG3
	Q86U42
	P17174
	P30536
	P29317
	Q9BRR6
	O15460
	Q9BYD1
	Q8IYB3
	Q9H1B7
	P07384
	Q9HC36
	Q9Y676
	Q9H0E9
	P23193
	P08779
	Q9NYY8
	Q9BYC8
	Q9UGP8
	P30086
	Q9NQH7
	Q8WW59
	Q13685
	Q93096
	Q9H4K7
	Q92820
	P26599
	O95758
	P30049
	A6NDG6
	P24539
	Q99426
	Q9UKA9
	P51149
	P14625
	P46782
	P20020
[truncated: 1,434 more rows]
