# Supplementary material for: CFTR Rescue by Lumacaftor (VX-809) Induces an Extensive Reorganization of Mitochondria in the Cystic Fibrosis Bronchial Epithelium
Source: Cells. 2022 Jun 16;11(12):1938. doi: 10.3390/cells11121938 (PMC9222197; doi:10.3390/cells11121938)
Supplement: Supplementary file 1 [file cells-11-01938-s001.zip › Supplementary File_2.xlsx]

## Sheet: DMSO
Control_Rep1	Control_Rep2	Control_Rep3	Common Controls
O95881	O95881	O95881	O95881
O00330	O00330	O00330	O00330
Q96GX9	Q96GX9	O76071	O76071
O76071	O76071	Q53EP0	Q53EP0
Q53EP0	Q53EP0	E9PQ51	Q13423
Q5XG87	E9PQ51	Q13423	O15066
Q13423	Q13423	O15066	P62875
O15066	O15066	Q9BRX9	Q9UIJ7
P62875	Q9BRX9	P62875	O60942
P29728	O75385	P29728	Q00577
Q9UIJ7	P62875	Q9UIJ7	Q9C0J8
O60942	Q9UIJ7	O60942	Q9UGI8
Q00577	O60942	Q00577	Q13185
Q9C0J8	Q00577	Q9C0J8	F5H5N1
Q9UGI8	Q9C0J8	Q9UGI8	H0YAJ5
Q13185	Q9UGI8	Q13185	Q15750
F5H5N1	Q13185	F5H5N1	P45974
H0YAJ5	F5H5N1	A6PW57	O43617
Q15750	A6PW57	H0YAJ5	Q9BSJ2
Q5QPI9	H0YAJ5	Q15750	Q8NHQ8
E9PJ30	Q15750	E9PJ30	Q71RC2
Q9NV72	Q5QPI9	Q9NV72	Q86SQ0
P45974	P45974	P45974	P31751
O43617	O43617	O43617	Q9UH17
K7ERP4	K7ERP4	Q9BSJ2	Q9ULK4
Q9BSJ2	Q9BSJ2	Q8NHQ8	Q92538
Q8NHQ8	P0DPB6	Q71RC2	P04632
Q71RC2	A0A286YFF5	Q86SQ0	Q6SJ93
Q86SQ0	Q8NHQ8	S4R302	Q96FV9
P31751	Q71RC2	P31751	P63104
Q9UH17	Q86SQ0	Q9UH17	A0A087X2I1
Q9ULK4	P0DJD0	Q9NYJ1	P58546
Q92538	P31751	Q9ULK4	Q9HA77
Q9NS40	Q9UH17	Q92538	Q53T59
P04632	Q9ULK4	P04632	H0YGR4
Q6SJ93	Q92538	Q6SJ93	P83436
Q96FV9	P04632	O14686	Q05639
P63104	Q6SJ93	Q96FV9	Q12979
A0A087X2I1	Q96FV9	P63104	A0A1W2PNX8
P58546	P63104	C9J235	Q9H5N1
Q9HA77	C9J235	A0A087X2I1	Q8N5A5
Q53T59	A0A087X2I1	P58546	A0A0D9SGE8
H0YGR4	P58546	Q86XK2	A8MXP9
P83436	Q86XK2	Q9HA77	Q9Y6D5
Q05639	Q9HA77	Q53T59	Q15434
Q12979	Q53T59	H0YGR4	Q9P0T7
A0A1W2PNX8	H0YGR4	P83436	P26641
Q9H5N1	P83436	Q05639	Q9UJX6
Q8N5A5	Q05639	Q12979	Q4G0F5
A0A0D9SGE8	P12757	A0A1W2PNX8	Q16777
A8MXP9	Q12979	Q9H5N1	Q9BQ67
Q9Y6D5	A0A1W2PNX8	Q8N5A5	B8ZZC8
Q15434	Q9H5N1	P0DPF3	Q08AM6
Q9P0T7	Q8N5A5	A0A0D9SGE8	O14879
P26641	A0A0D9SGE8	A8MXP9	B0QYK0
Q9UJX6	A8MXP9	A0A0U1RRJ3	C9JRD2
Q4G0F5	A0A0U1RRJ3	Q9Y6D5	Q86XN8
A0A087WXR3	Q9Y6D5	Q15434	B4DKV7
Q16777	Q15434	Q9P0T7	Q9UNN8
Q9BQ67	A0A087X119	O75386	F5GZS6
P11586	Q9P0T7	P26641	P30154
B8ZZC8	O75386	Q9UJX6	Q92805
Q08AM6	P26641	Q4G0F5	Q9BYG5
O14879	Q9UJX6	Q16777	F5H757
P31944	Q4G0F5	Q9BQ67	A0A0A0MTL6
B0QYK0	Q16777	F8WEF5	F5H4N4
C9JRD2	Q9P2K6	B8ZZC8	P27540
Q86XN8	O95772	Q08AM6	H0Y4E8
B4DKV7	Q9BQ67	O14879	Q5T280
Q9UNN8	F8WEF5	B0QYK0	Q96BX8
F5GZS6	P11586	C9JRD2	P53597
Q9UPS8	B8ZZC8	Q86XN8	O75381
H3BRD5	Q08AM6	B4DKV7	O15264
Q8WUA8	O14879	Q9UNN8	P46977
P30154	B0QYK0	F5GZS6	P10644
Q92805	C9JRD2	Q9UPS8	Q9Y4G6
Q9BYG5	Q86XN8	Q9H3S5	O15498
F5H757	B4DKV7	P30154	H3BMD8
A0A0A0MTL6	Q9UNN8	Q92805	Q8WVK2
F5H4N4	F5GZS6	Q9BYG5	Q9H173
P27540	H3BRD5	F5H757	Q08623
H0Y4E8	Q9H910-2	Q9Y663	Q9UBS4
Q5T280	Q13487	A0A0A0MTL6	Q460N5-1
Q96BX8	P30154	F5H4N4	P61026
P53597	Q92805	P27540	Q8TED0
O75381	E2QRF0	H0Y4E8	Q7L5N7
O15264	Q9BYG5	Q5T280	G3V5T0
A0A0A0MSA0	F5H757	Q96BX8	Q07889
P46977	A0A0A0MTL6	P53597	O43815
P10644	F5H4N4	O75381	A8MQ02
Q9Y4G6	P27540	O15264	G3V3R7
O15498	H0Y4E8	A0A087X0G5	E9PNP3
H3BMD8	Q5T280	P46977	Q9BVS4
Q8WVK2	Q96BX8	P10644	F5GYQ1
Q9H173	P53597	Q9Y4G6	Q9UHL4
Q08623	O75381	O15498	Q9Y496
Q9UBS4	D6RAN8	H3BMD8	A0A075B7G8
Q460N5-1	O15264	Q8WVK2	J3KN67
B5MBX0	A0A0A0MSA0	Q9BRT3	A0A0D9SF70
P61026	P46977	Q53SF7	Q9H1E3
Q8TED0	P10644	Q9H173	Q86U28
Q7L5N7	P51805	Q08623	E9PEE8
G3V5T0	Q9Y4G6	Q9UBS4	A0A0G2JNY3
Q07889	O15498	Q6PIJ6	E9PS76
O43815	H3BMD8	Q460N5-1	Q9NR28
A8MQ02	Q8WVK2	P61026	Q6XZF7
O76080	Q9BRT3	Q8TED0	Q12996
G3V3R7	Q9H173	Q96AP0	Q9UHQ1
E9PNP3	Q08623	Q7L5N7	Q9BVC4
Q9BVS4	Q9UBS4	G3V5T0	G3XAN8
F5GYQ1	Q6PIJ6	J3QL56	Q9NYB9
Q15047	Q460N5-1	Q07889	F5H365
Q9UHL4	B5MBX0	O43815	Q9H9Q4
A0A1X7SBW3	P61026	A8MQ02	O15530
Q9Y496	Q8TED0	O76080	O95749
A0A075B7G8	Q96AP0	G3V3R7	Q6P1L5
J3KN67	Q7L5N7	E9PNP3	Q9NZC9
A0A0D9SF70	G3V5T0	Q9BVS4	O43824
Q9H1E3	Q07889	F5GYQ1	Q8ND24
Q86U28	O43815	Q9UHL4	P48739
B7ZLI8	A8MQ02	A0A1X7SBW3	Q00341
E9PEE8	G3V3R7	Q9Y496	P40306
A0A0G2JNY3	E9PNP3	A0A075B7G8	Q96D71
E9PS76	Q9BVS4	J3KN67	A6NNK5
Q9NR28	F5GYQ1	A0A0D9SF70	Q9ULM6
Q6XZF7	Q15047	P15407	A0A1W2PRA1
Q12996	Q9UHL4	Q9H1E3	A0A087WYV9
Q9UHQ1	Q9Y496	Q86U28	P09497-2
Q9BVC4	A0A075B7G8	B7ZLI8	Q16836
G3XAN8	J3KN67	E9PEE8	Q5T0F9
Q9NYB9	A0A0D9SF70	A0A0G2JNY3	Q96F24
F5H365	P15407	E9PS76	Q9NYZ3
Q9H9Q4	Q9H1E3	Q9NR28	Q9BZD3
O15530	Q86U28	Q6XZF7	Q7Z2W9
O95749	E9PEE8	Q12996	E9PD50
Q6P1L5	A0A0G2JNY3	Q9UHQ1	Q9NVI1
Q9NZC9	E9PS76	Q9BVC4	Q92733
O43824	Q9NR28	G3XAN8	E9PMH5
Q8ND24	Q6XZF7	Q9NYB9	P13473
P48739	Q12996	F5H365	P39023
Q00341	A8MYS5	Q99590	Q8TAE6
P40306	Q9UHQ1	Q9H9Q4	Q86VY4
Q96D71	Q9BVC4	Q9BUH6	A0A024QZ33
A6NNK5	G3XAN8	O15530	P52943
Q9ULM6	Q9NYB9	O95749	O00429-4
B7Z7N5	F5H365	Q6P1L5	X6RLX0
A0A1W2PRA1	Q99590	Q9NZC9	Q15642
A0A087WYV9	Q9H9Q4	O43824	Q9HB66
P09497-2	Q9BUH6	Q8ND24	Q96S66
Q16836	O15530	P48739	P51532
Q5T0F9	O95749	Q00341	Q92621
Q96F24	Q6P1L5	P40306	Q2TAA2
Q9NYZ3	Q9NZC9	Q96D71	P53365
Q9BZD3	O43824	A6NNK5	P28838
Q7Z2W9	Q8ND24	Q9ULM6	E7ESC6
E9PD50	P48739	B4DXS3	P38606
P69905	Q00341	B7Z7N5	Q9NY12
Q9NVI1	P40306	A0A1W2PRA1	Q7Z7L7
Q92733	Q96D71	A0A087WYV9	Q71UI9
E9PMH5	A6NNK5	P09497-2	Q12929
P13473	Q9ULM6	Q16342	Q8IV38
P39023	G3V1B2	Q16836	Q14914
Q8TAE6	A0A1W2PRA1	Q5T0F9	Q96IW7
Q86VY4	A0A087WYV9	Q96F24	Q16718
A0A024QZ33	P09497-2	Q9NYZ3	P35658
P52943	Q16836	Q9BZD3	A0A0G2JNC7
O00429-4	Q5T0F9	Q7Z2W9	P18583
X6RLX0	Q96F24	E9PD50	P35251
Q15642	Q9NYZ3	F5H1N7	Q9HAU0
Q9HB66	H7C3A6	Q5HYK3	M0R205
Q6ZMG9	Q9BZD3	P69905	P18754
Q96S66	Q7Z2W9	Q9NVI1	P49441
P51532	E9PD50	Q9NXD2	Q96KB5
Q92621	F5H1N7	Q92733	O43166
Q2TAA2	Q5HYK3	E9PMH5	B0QXZ9
F5H8G1	Q9NVI1	P13473	P24539
P53365	Q92733	P39023	P43304
P28838	E9PMH5	Q8TAE6	Q8WW12
E7ESC6	P13473	Q86VY4	Q15631
P38606	P39023	A0A024QZ33	Q15058
Q9NY12	Q8TAE6	P52943	Q9NVX0
Q7Z7L7	Q86VY4	Q8IXJ9	P23497
Q9UI42	A0A024QZ33	O00429-4	Q86YV5
Q71UI9	P52943	X6RLX0	A0A087X0R6
Q12929	Q8IXJ9	Q15642	O94964-2
Q8IV38	O00429-4	Q9HB66	O00462
Q14914	X6RLX0	Q96S66	Q12769
Q96IW7	Q15642	P51532	P27695
Q16718	Q9HB66	Q92621	Q7L5Y9
P35658	Q96S66	Q2TAA2	A0A1W2PNP0
A0A0G2JNC7	P51532	F5H8G1	J3QRU8
P18583	Q92621	P53365	Q9BRP4
P35251	Q2TAA2	P28838	A0A0C4DFL7
Q9HAU0	P53365	E7ESC6	J3KR97
M0R205	P28838	P38606	Q5TCU3
P18754	E7ESC6	Q9NY12	G3V4K3
P49441	P38606	Q7Z7L7	Q8NC44
Q96KB5	Q9NY12	Q9UI42	Q7Z2E3
O43166	Q7Z7L7	Q71UI9	P08133
B0QXZ9	Q71UI9	Q12929	Q9UJC3
P24539	Q12929	Q8IV38	P26373
P43304	Q8IV38	Q14914	O00308
Q8WW12	Q14914	Q96IW7	P23786
Q15631	Q96IW7	Q16718	Q9BQ90
Q15058	Q16718	P35658	Q12792
Q9NVX0	P35658	A0A0G2JNC7	Q8N573
P23497	A0A0G2JNC7	P18583	P78417
Q86YV5	P18583	O14647	Q9Y5A7
A0A087X0R6	P35251	P35251	Q6PGP7
O94964-2	Q9HAU0	Q9HAU0	P48556
O00462	M0R205	M0R205	Q8IWJ2
Q14703	P18754	P18754	O75449
Q12769	P49441	P49441	P54578
P27695	Q96KB5	Q96KB5	P07305
Q96Q07	O43166	O43166	Q5T4U5
Q7L5Y9	B0QXZ9	B0QXZ9	P23368
A0A1W2PNP0	P24539	P24539	O14787-2
J3QRU8	P43304	P43304	P08729
Q9BRP4	O95926	O95926	Q9BWJ5
A0A0C4DFL7	Q8WW12	Q8WW12	D6RIU2
J3KR97	Q15631	Q15631	Q13888
Q5TCU3	E9PDK2	Q86SQ7	Q14807
G3V4K3	Q15058	E9PDK2	F6U1T9
F5GYX3	Q9NVX0	Q15058	P16190
Q8NC44	B9EGQ5	Q9NVX0	P84243
O00628	P23497	P23497	Q99961
Q7Z2E3	Q86YV5	Q86YV5	Q86UL3
Q8NBU5	A0A087X0R6	A0A087X0R6	P21912
P08133	O94964-2	O94964-2	H0Y9X1
Q9UJC3	O00462	O00462	Q96QD8
P26373	Q14703	Q12769	Q06481
F5H5N2	Q12769	P27695	Q92620
O00308	P27695	Q7L5Y9	P46926
P23786	Q7L5Y9	A0A1W2PNP0	A0A1B0GVH5
Q9BQ90	A0A1W2PNP0	J3QRU8	Q8NHU6
Q12792	J3QRU8	Q9BRP4	O60930
Q8N2G8	Q9BRP4	A0A0C4DFL7	Q96EB6
Q8N573	A0A0C4DFL7	J3KR97	Q99569
J3KPD3	J3KR97	C9JLV4	I3L3S0
P78417	C9JLV4	Q5TCU3	Q9NP77
Q9Y5A7	Q5TCU3	Q9NXS2	O14976
Q6PGP7	G3V4K3	G3V4K3	E9PFT6
P48556	Q8NC44	F5GYX3	S4R410
Q9HCK8	Q7Z2E3	Q8NC44	J3KQN4
Q8IWJ2	Q8NBU5	Q7Z2E3	O60911
O75449	Q9H0I3	Q8WWV3	Q9UKV8
P54578	P08133	P08133	Q969Y2
P07305	Q9UJC3	Q9UJC3	Q5T5C7
Q5T4U5	P26373	P26373	A0A087X2D5
P23368	F5H5N2	O43422	Q86VP6
O14787-2	O43422	O00308	J3KNR0
P08729	O00308	P23786	Q9P003
Q9BWJ5	P23786	Q9BQ90	E9PHY0
D6RIU2	Q9BQ90	Q12792	Q92890-1
Q13888	Q12792	Q8N2G8	Q13561
Q14807	P48426	Q8N573	Q8IWZ3-6
F6U1T9	Q8N573	J3KPD3	Q9H4G0-3
P16190	P78417	P78417	Q9UHW5
P84243	Q9Y5A7	A0A024RCQ8	P62820
A6XND1	Q9P2K2	Q9Y5A7	H0YKL0
Q99961	Q6PGP7	Q9P2K2	O15327
E9PC65	P48556	Q6PGP7	P48059
Q86UL3	Q8IWJ2	P48556	G5E975
P21912	O75449	Q8IWJ2	Q5VIR6-4
H0Y9X1	P54578	O75449	P11388
Q96QD8	P07305	P54578	Q99717
Q06481	Q5T4U5	P07305	A0A087X0W9
A0A1P0AYU5	P23368	Q5T4U5	P13010
Q92620	O14787-2	P23368	P21283
P46926	P08729	O14787-2	P05026
A0A1B0GVH5	Q9BWJ5	P08729	A0A0C4DGG1
Q8NHU6	D6RIU2	Q9BWJ5	Q96KG9
O43688	A0A182DWF2	D6RIU2	Q8WYA6
O60930	Q13888	Q13888	Q9NZM1
Q96EB6	Q14807	Q14807	Q5TBB1
Q99569	F6U1T9	F6U1T9	W5RWE6
I3L3S0	P16190	P16190	X6RM59
M0QXN9	Q01432	P84243	Q96IK1
Q9NP77	P84243	Q99961	F8VUA2
O14976	A6XND1	Q86UL3	Q8WVV9
B1AHJ5	Q99961	P21912	Q9H444
J3KSP0	Q86UL3	H0Y9X1	P05121
E9PFT6	P21912	Q96QD8	P08621
S4R410	H0Y9X1	Q06481	Q658P3
J3KQN4	Q96QD8	P53701	O00116
O60911	Q06481	Q92620	A0A1B0GUI1
Q9UKV8	Q92620	P46926	Q969P0
Q969Y2	P46926	A0A1B0GVH5	Q7Z2K8
O95251	A0A1B0GVH5	Q9NWX5	P15531
Q5T5C7	Q9NWX5	Q8NHU6	Q12899
A0A087X2D5	P20933	O60930	P26196
Q86VP6	Q8NHU6	Q96EB6	Q9NQT5
J3KNR0	O60930	Q99569	Q9NRL3
Q9P003	Q96EB6	I3L3S0	O75695
E9PHY0	Q99569	Q9NP77	A0A0J9YWL0
Q9BQ04	I3L3S0	O14976	Q9NR33
Q92890-1	M0QXN9	J3KSP0	Q5VTR2
E7EX64	Q9NP77	E9PFT6	K4DIA8
Q13561	O14976	S4R410	Q9NV35
A0A0G2JH37	B1AHJ5	J3KQN4	J3KT75
E9PCV4	E9PFT6	O60911	P15923
Q96IG2	S4R410	Q9UKV8	Q5JTZ9
P48553	J3KQN4	Q969Y2	C9J991
Q8IWZ3-6	O60911	Q5T5C7	O00629
Q9H4G0-3	Q9UKV8	A0A087X2D5	O60333-3
Q9UHW5	Q969Y2	Q86VP6	Q12986
P62820	O95251	J3KNR0	Q9HCE5
H0YKL0	Q5T5C7	Q9P003	O00159
O15327	A0A087X2D5	E9PHY0	Q9Y6R9
P48059	Q86VP6	Q8NA72	Q9NZJ4
G5E975	J3KNR0	Q92890-1	Q8NF64
Q86SX6	Q9P003	Q13561	P05388
Q5VIR6-4	E9PHY0	A0A0G2JH37	A0A0A0MRJ3
P11388	Q92890-1	C9J9P8	A0A0A0MT01
Q99717	Q13561	P24844	Q9BXJ9
A0A087X0W9	Q96IG2	Q8IWZ3-6	O00267-2
P13010	P48553	Q9H4G0-3	P06865
P21283	P24844	Q9UHW5	Q9BZE9
P05026	A0A087WZ85	P62820	O15226
A0A0C4DGG1	Q8IWZ3-6	H0YKL0	Q9P0N9
Q96KG9	Q9H4G0-3	O15327	P20248
Q8WYA6	Q9UHW5	P48059	Q8WUI4
Q9NZM1	P62820	G5E975	P34059
Q5TBB1	H0YKL0	Q8NDD1	B8ZWD1
W5RWE6	O15327	Q5VIR6-4	Q14651
X6RM59	P48059	P11388	F8W7U0
Q96IK1	Q6ZW49	Q99717	Q9Y333
F8VUA2	G5E975	A0A087X0W9	O75347
Q8WVV9	Q9Y5P8	P13010	H7C173
Q9H444	Q86SX6	P21283	P14625
P05121	Q5VIR6-4	P05026	J3QRU1
O15550	P11388	A0A0C4DGG1	F5GWA4
P08621	Q99717	Q96KG9	Q12959
Q658P3	A0A087X0W9	Q8WYA6	Q96AE4
O00116	P13010	Q9NZM1	P0CG13
A0A1B0GUI1	P21283	Q5TBB1	Q14683
Q969P0	P05026	W5RWE6	F8WCT1
A0A1B0GWA1	A0A0C4DGG1	X6RM59	Q9NQC8
Q7Z2K8	Q96KG9	A0A087WZZ6	X6RLT1
P15531	Q8WYA6	Q96IK1	H0YAR2
P02462	Q9NZM1	F8VUA2	Q9BVP2
O43854	Q5TBB1	Q8WVV9	M9T4I7
Q12899	O00506	Q9H444	Q86YP4
P17405	W5RWE6	H3BPM9	Q9BRX8
O75064	Q13555-9	P05121	Q9Y606
P26196	X6RM59	P08621	A0A0A0MR51
Q9NQT5	A0A087WZZ6	Q658P3	P40763
B5MDG7	Q96IK1	O00116	Q9Y394
Q9NRL3	F8VUA2	A0A1B0GUI1	E9PN10
O75695	Q8WVV9	Q969P0	Q15424
A0A0J9YWL0	Q9H444	Q7Z2K8	Q14331
Q9NR33	H3BPM9	P15531	Q8WZ82
Q5VTR2	P05121	Q12899	P13984
K4DIA8	P08621	P26196	P11216
Q9NV35	Q658P3	Q9NQT5	Q96T76
J3KT75	O00116	Q14677-3	Q9NSK0
P15923	A0A1B0GUI1	Q5F1R6	P47895
Q5JTZ9	Q969P0	Q7L8J4	Q02952
C9J991	A0A1B0GWA1	Q7L590	P30050
Q8N271	Q7Z2K8	A0A1W2PS27	cRAPR1
O00629	P15531	M0QZM1	Q9UBU9
O60333-3	Q12899	Q9BXL7	Q14192
Q12986	P17405	Q9NRL3	Q92845
Q9HCE5	O75064	O75695	Q08209-2
O00159	P26196	A0A0J9YWL0	Q9P035
Q9Y6R9	Q9NQT5	F8W8D3	Q9NVQ4
Q9NZJ4	Q14677-3	Q9NR33	P20290-2
Q8NF64	Q5F1R6	Q5VTR2	Q13126
P05388	B5MDG7	K4DIA8	Q9H4Z3
O95164	Q9BXL7	Q9NV35	Q01085
A0A0A0MRJ3	Q9NRL3	J3KT75	Q99567
P49848	O75695	P15923	Q9UNS1
A0A0A0MT01	A0A0J9YWL0	Q5JTZ9	P16144-2
Q9BXJ9	Q9NR33	P09038-1	Q14554
E9PLP5	Q5VTR2	C9J991	Q96HP0
O00267-2	K4DIA8	O00629	P58107
P06865	Q9NV35	O60333-3	H0Y547
Q9BZE9	J3KT75	Q12986	Q96C36
Q5T7V8	P15923	Q9HCE5	Q8IZT6
O15226	P55822	O00159	Q8IZH2
Q9P0N9	Q5JTZ9	Q9Y6R9	Q9BY44
P20248	C9J991	Q9NZJ4	Q9BQA1
Q8WUI4	Q8N271	Q8NF64	Q86X55
P34059	O00629	P05388	P28074
B8ZWD1	O60333-3	Q13445	Q9ULH1
Q14651	Q12986	A0A0A0MRJ3	Q9NZI8
F8W7U0	Q9HCE5	Q8IVQ6	Q96Q11
Q9Y333	O00159	A0A0A0MT01	P98194
O60239	Q9Y6R9	Q9BXJ9	Q7Z794
O75347	Q9NZJ4	O00267-2	Q8TAQ2
H7C173	Q8NF64	Q9BT92	O14641
P14625	P05388	P06865	Q2M2I8
Q86WC4	O95164	Q9BZE9	J3QLG5
J3QRU1	A0A0A0MRJ3	O15226	Q92503
E9PMC3	P49848	Q9P0N9	Q16576
F5GWA4	A0A0A0MT01	P20248	Q8WUB8
Q9H0E9	Q9BXJ9	Q8WUI4	Q9Y6M1
Q12959	O00267-2	P34059	Q9P0J1
Q96AE4	P06865	P46527	Q8TAA9
P0CG13	Q9BZE9	B8ZWD1	Q96BZ9
Q14683	Q5T7V8	Q14651	Q86YS7
Q8TCT9-2	O15226	F8W7U0	O15231
A0A0U1RR70	Q9P0N9	Q9Y333	Q31612
F8WCT1	P20248	O75347	P43121
Q9NQC8	Q8WUI4	H7C173	Q02833
Q6PCE3	P34059	P14625	B3KVZ3
Q7Z7N9	P46527	J3QRU1	O95707
X6RLT1	B8ZWD1	K7ELY2	Q5JPH6
H0YAR2	Q14651	F5GWA4	E7ESY4
Q9BVP2	F8W7U0	Q9H0E9	G3V4T7
P36894	Q9Y333	Q12959	H3BSW6
H3BUD2	O75347	O00217	Q9UID3
Q96AJ9-1	H7C173	Q96AE4	Q9BT22
M9T4I7	P14625	P0CG13	Q92614
Q86YP4	Q86WC4	Q14683	Q13131
Q9BRX8	J3QRU1	Q96QE3	Q13257
Q9Y606	K7ELY2	F8WCT1	P49257
A0A0A0MR51	F5GWA4	Q9NQC8	H3BNT4
P40763	Q12959	Q7Z7N9	Q9NPE3
Q9Y394	O00217	X6RLT1	Q99832
E9PN10	Q9Y5T4	Q96B96	Q9UJX4
Q15424	Q96AE4	F8VRL1	P51991
Q14331	F8VSI7	H0YAR2	B7ZKQ9
Q8WZ82	P0CG13	Q9BVP2	Q16533
P13984	Q14683	Q96AJ9-1	Q9P0V9
P11216	Q96QE3	M9T4I7	Q9Y6D9
Q96T76	F8WCT1	Q86YP4	P28331
Q9NSK0	Q9NQC8	Q9H4K7	P09914
P47895	X6RLT1	Q9BRX8	Q5EBL4
Q02952	Q96B96	Q9Y606	M0R0P8
P30050	H0YAR2	A0A0A0MR51	Q9Y605
cRAPR1	Q9BVP2	P40763	Q9BXK5
Q9UBU9	H3BUD2	Q9Y394	Q9Y2Z4
Q14192	M9T4I7	E9PN10	P61201
Q92845	Q86YP4	Q15424	Q9Y230
Q08209-2	Q9H4K7	Q14331	P38935
Q9P035	Q9BRX8	Q8WZ82	O14974
Q9NVQ4	Q9Y606	P13984	G3V4W4
P20290-2	A0A0A0MR51	P11216	Q9H223
Q13126	P40763	Q96T76	Q96GA3
O75964	Q5T9C2	Q9NSK0	Q96DZ1
Q9H4Z3	P17152	P47895	Q9UKV5
Q01085	Q9Y394	Q02952	Q9UKG1
F8VVY2	E9PN10	P30050	Q96JN8
Q99567	Q15424	Q7Z2W4	E9PP21
Q9UNS1	Q14331	cRAPR1	Q9NWV4
P16144-2	Q8WZ82	Q9UBU9	A6NKD9
Q14554	P13984	Q14192	Q13347
P24311	P11216	Q92845	J3KNN5
Q96HP0	Q96T76	Q08209-2	Q9BX10
P58107	Q9NSK0	Q9P035	Q7KZ85
H0Y547	P47895	Q9NVQ4	Q14517
Q96C36	Q02952	P20290-2	Q15149-4
Q8IZT6	P30050	Q13126	Q15262
Q9BZ95	Q7Z2W4	O75964	Q6ZMI0
Q8IZH2	cRAPR1	Q9H4Z3	Q9HAB8
Q9BY44	Q9UBU9	Q01085	Q9Y5B8
Q9BQA1	Q14192	Q99567	Q9H7D0
Q86X55	Q92845	Q9UNS1	P52435
P28074	Q08209-2	P16144-2	Q96P16
Q9ULH1	Q9P035	Q14554	Q16775
Q9NZI8	Q9NVQ4	Q96HP0	P35270
Q96Q11	P20290-2	P58107	E7EM64
P98194	Q13126	H0Y547	Q8NE71
Q7Z794	Q9H4Z3	Q96C36	Q9NW75
Q8TAQ2	Q01085	Q8IZT6	Q9NVG8
O14641	Q99567	Q8IZH2	A0A0A0MT60
Q2M2I8	Q9UNS1	Q9BY44	P19387
J3QLG5	P16144-2	Q9BQA1	O75976
Q92503	Q14554	Q86X55	Q9H9L3
Q16576	Q96HP0	P28074	O15182
Q8WUB8	P58107	Q9ULH1	P63165
E9PBC1	H0Y547	A0A1B0GWG1	Q53GS9
Q9Y6M1	Q96C36	Q9NZI8	Q99543
Q9P0J1	Q8TCX1	Q96Q11	P42892
Q8TAA9	Q8IZT6	P98194	O15260
Q96BZ9	Q9UBH6	Q7Z794	P52298
C9JWV9	Q8IZH2	Q8TAQ2	Q96AX1
Q86YS7	Q9BY44	Q96D05	Q2M389
O15231	Q9BQA1	O14641	Q96MW5
Q31612	Q86X55	Q2M2I8	O75348
P43121	P28074	Q13268	O43520
Q02833	Q9ULH1	J3QLG5	P17980
B3KVZ3	A0A1B0GWG1	Q92503	Q9NZ45
O95707	Q9NZI8	Q16576	Q9UJX2
Q5JPH6	Q9UL01	Q8WUB8	P54725-3
E7ESY4	Q96Q11	Q9Y6M1	A8MUM1
G3V4T7	F8WD41	Q9P0J1	Q8N5I2
H3BSW6	P98194	A0A1W2PP10	A8K727
Q9UID3	Q7Z794	V5IRT4	Q9NXE4
Q9BT22	Q8TAQ2	Q8TAA9	J3QRU4
Q92614	O14641	Q9BX63	P35914
Q13131	Q2M2I8	Q96BZ9	O95292
Q13257	Q13268	Q86YS7	Q9NR30
J3QQK5	J3QLG5	O15231	O43181
P49257	Q92503	Q96EL3	E9PC15
O43760	Q16576	Q31612	F8VW96
H3BNT4	Q8WUB8	P43121	Q02388
Q9NPE3	Q6V1X1	Q02833	O00571
Q99832	Q9Y6M1	B3KVZ3	Q8TAF3
Q9UJX4	Q9P0J1	O95707	cRAP013
P51991	Q7Z7F0	Q5JPH6	O96013
B7ZKQ9	A0A1W2PP10	E7ESY4	P04183
Q99519	V5IRT4	G3V4T7	P08865
Q99766	Q8TAA9	H3BSW6	M0QZ22
Q16533	Q9BX63	Q9UID3	B7Z6Z4
Q9P0V9	Q96BZ9	Q9BT22	P18031
Q9Y6D9	C9JWV9	Q92614	Q9BY67
P28331	Q86YS7	Q13131	P82914
P09914	B1AKP2	Q9NQE9	P30085
Q5EBL4	O15231	Q13257	F8WA39
M0R0P8	Q31612	J3QQK5	A2ACR1
Q9Y605	P43121	P49257	A3KMH1
Q9BXK5	Q02833	O43760	O60264
Q96B45	B3KVZ3	H3BNT4	G3V5N8
Q9Y2Z4	O95707	Q9NPE3	Q5VT06
P61201	Q5JPH6	Q99832	O43684
Q9Y230	A0A075B6P0	Q9UJX4	Q9H0H5
P38935	E7ESY4	P51991	Q92734
O14974	G3V4T7	B7ZKQ9	Q15035
G3V4W4	H3BSW6	Q99519	Q9H1K0
Q9UN79	Q9UID3	Q16533	F5GY88
Q9H223	Q9BT22	Q9P0V9	Q8IZ83
Q96GA3	Q92614	B1AHC3	P20810-6
P55899	Q13131	Q9Y6D9	Q5W111
Q2TAM9	Q9NQE9	P28331	Q96HY7
Q96DZ1	Q13257	P09914	P07996
Q9UKV5	P49257	Q5EBL4	C9J5X1
Q9UKG1	H3BNT4	M0R0P8	Q13043
Q96JN8	Q9NPE3	Q9Y605	Q9BY11
E9PP21	Q99832	P16298	P04062
Q13873	Q9UJX4	Q9H6R0	F5H7W8
Q9NWV4	P51991	Q9BXK5	E9PDF6
E9PLD2	B7ZKQ9	Q6SZW1	Q08AD1-2
E9PFW6	Q16533	M0R0R3	A4D1U4
H7BYD9	Q9P0V9	Q9Y2Z4	Q9H0U3
A6NKD9	B1AHC3	P61201	P26440
Q53RE8	Q9Y6D9	Q9Y230	P55199
Q13347	P28331	P38935	A0A087X295
J3KNN5	P09914	O14974	Q71UM5
Q9BX10	Q5EBL4	G3V4W4	P26572
Q7KZ85	M0R0P8	P14406	Q6WKZ4
Q8IYQ7	Q9Y605	Q96ME7	Q3LXA3
Q14517	Q9BXK5	A0A0G2JNZ7	Q9H410
Q15149-4	Q96B45	Q5HYI7	P13667
Q8TED9	M0R0R3	Q9H223	P18669
A6NHL2	Q9Y2Z4	Q9UN86-2	Q13753
Q15642-2	P61201	Q96GA3	Q9Y4H2
Q15262	Q9Y230	Q9UH92	Q7Z333
Q6ZMI0	P38935	Q2TAM9	P41208
Q9HAB8	O14974	Q96DZ1	F5H5D3
Q9Y5B8	G3V4W4	H0YNH1	Q8NBM4
Q9H7D0	P14406	Q9UKV5	O15347
P52435	Q96ME7	Q9UKG1	P51668
Q96P16	Q5HYI7	Q96JN8	P63146
Q16775	Q9H223	E9PP21	Q9NRZ9
P35270	Q96GA3	Q9NWV4	Q9BZD4
E7EM64	P55899	E9PFW6	G3V5R9
Q8NE71	Q9UH92	Q9Y6N5	P13798
Q9NW75	Q96DZ1	A0A1B0GW23	P13746
Q9NVG8	Q9UKV5	A6NKD9	P04066
A0A0A0MT60	Q9UKG1	O75689	E9PC47
P19387	Q96JN8	Q13347	Q16778
O75976	E9PP21	J3KNN5	Q9H2H9
Q9H9L3	Q13873	Q9BX10	C9JQS9
O15182	Q9NWV4	Q7KZ85	P61204
P63165	P07951-3	Q14517	C9JG87
Q53GS9	Q9Y6N5	Q15149-4	E7ENY0
Q96EL2	A0A1B0GW23	A0A0A0MS70	Q9BZE4
P28347	A6NKD9	Q15262	A4D1P6
Q99543	Q53RE8	B7Z1T1	E7EPW5
P42892	O75689	Q6ZMI0	H7BXI1
P27449	Q13347	Q9HAB8	Q96DI7
O15260	J3KNN5	Q9Y5B8	Q7L8L6
P52298	Q9BX10	Q9H7D0	Q9BV57
Q9H819	J3QQW2	P52435	P14174
Q96AX1	Q7KZ85	Q96P16	Q99459
J3QL71	P15408	Q16775	cRAP087
Q9NVN3-1	Q14517	P35270	P43487
Q2M389	V9GYI2	E7EM64	Q7Z4H8
Q96MW5	Q15149-4	Q8NE71	Q7Z4S6
O75348	A0A0A0MS70	O75896	Q6ZWT7
O43520	A6NHL2	Q9NW75	O60784
P17980	Q15262	Q9NVG8	Q7Z2T5
Q9NZ45	Q6ZMI0	Q9H5J4	Q05086
Q9UJX2	Q9HAB8	A0A0A0MT60	Q9BV40
P54725-3	Q9Y5B8	P19387	P09486
Q5JQP3	Q9H7D0	O75976	Q9BRZ2
Q05BS2	P52435	Q9H9L3	Q16891-2
A8MUM1	Q96P16	O15182	Q14244
Q8N5I2	Q16775	P63165	O15118
A8K727	P35270	Q53GS9	Q9BR61
Q9NXE4	E7EM64	Q99543	Q9Y3M8
J3QRU4	Q8NE71	P42892	Q9NX18
A0A087WVC6	Q9NW75	Q9UDX5	P00390
P35914	Q9NVG8	P27449	F8WAN9
Q9Y5Y0	A0A0A0MT60	O15260	G3V1N3
O95292	P47872	P52298	Q9Y2H0-1
Q9NR30	P16220	Q96AX1	Q9H147
O43181	P19387	Q2M389	Q15464
E9PC15	O75976	Q96MW5	O14562
F8VW96	Q9H9L3	O75348	Q15393
Q02388	O15182	O43520	P41227
F5H538	P63165	P17980	Q8NBI6
O00571	Q53GS9	Q9NZ45	L0R6Q1
P78381	Q99543	Q6P9A3	A0A0J9YVP6
Q8TAF3	P42892	Q9UJX2	Q8NHP6
cRAP013	O15260	P54725-3	P30492
O96013	A0A0C4DH49	Q5JQP3	A0A0A0MRM9
P04183	P52298	A8MUM1	U3KQ69
P08865	Q9H819	Q8N5I2	A0A087WYR0
M0QZ22	Q96AX1	A8K727	F5H269
Q8N490	Q9P2R6	Q9NXE4	Q96S44
P54278	Q2M389	J3QRU4	P98173
O94864	Q96MW5	P35914	P21964
Q6XQN6	O75348	Q96BW5	J3QR07
Q8NEZ3	O43520	O95292	Q8IWR0
B7Z6Z4	P17980	E7EV89	Q7LG56
P18031	Q9NZ45	Q9NR30	P29350
Q9BY67	Q6P9A3	O43181	Q15836
P82914	Q9UJX2	Q9BR77	Q8WUF5
P30085	P54725-3	E9PC15	Q6P5Z2
F8WA39	A8MUM1	F8VW96	P26583
A2ACR1	Q8N5I2	Q02388	Q9Y3Z3
A3KMH1	A8K727	O00571	P49792
X6R717	Q9NXE4	P78381	O75940
O60264	J3QRU4	Q8TAF3	M0R366
G3V5N8	B3KUS5	cRAP013	E9PHA2
Q5VT06	P35914	O96013	P82675
O43684	Q9Y5Y0	P04183	Q9NV31
Q9H158	O95292	P08865	Q96F44
Q9H0H5	E7EV89	M0QZ22	J3QTR3
Q92734	Q9NR30	Q96I15	A0A0U1RRB3
Q15035	O43181	O94864	Q6UW02
Q9H1K0	E9PC15	Q6XQN6	Q9BRX5
F5GY88	F8VW96	B7Z6Z4	O75165
Q8IZ83	Q02388	P18031	A0A087WUQ6
P20810-6	F5H538	Q9BY67	Q02083
Q5W111	O00571	P82914	F8W809
Q96HY7	Q8TAF3	P30085	A6NMQ1
P28827	cRAP013	F8WA39	Q14974
P07996	O96013	A2ACR1	Q9Y224
C9J5X1	P04183	A3KMH1	P19367
Q13043	P08865	O60264	Q9H0A8
Q9BY11	Q9UHB6-4	G3V5N8	Q9BYC5
P04062	M0QZ22	Q5VT06	P50991
F5H7W8	Q96I15	O43684	D6RHI9
E9PDF6	P54278	Q9H0H5	Q9NYY8
Q08AD1-2	B7Z6Z4	Q92734	P33240
A4D1U4	P18031	Q15035	Q6PL18
Q96Q83	Q9BY67	Q9H1K0	P35998
Q9H0U3	P82914	F5GY88	P12236
P26440	P30085	Q8IZ83	Q07864
P55199	F8WA39	P20810-6	P29373
A0A087X295	A2ACR1	Q5W111	Q9H2C2
E9PC66	A3KMH1	Q96HY7	Q96RR4
Q71UM5	O60264	P07996	Q9H0A0
P26572	O94762	C9J5X1	Q14435
Q6WKZ4	G3V5N8	Q13043	Q96Q05
Q3LXA3	Q5VT06	Q9BY11	Q04837
Q9H410	O43684	P04062	Q9NR50
P13667	Q9H0H5	F5H7W8	Q13630
Q6UX72	Q92734	E9PDF6	E9PRJ8
P18669	Q15035	Q08AD1-2	P18887
Q13753	Q9H1K0	A4D1U4	A0A087X0W8
Q9Y4H2	Q9BPU9	Q9H0U3	Q9UBP9
Q7Z333	F5GY88	Q5VWZ2	O95747
P41208	Q8IZ83	P26440	P11172
F5H5D3	P20810-6	P55199	Q96T51
Q8NBM4	Q5W111	A0A087X295	P39687
O94806	Q96HY7	Q71UM5	P49069
O15347	P28827	P26572	O94885
P51668	P07996	Q6WKZ4	F5H3M2
P63146	C9J5X1	Q3LXA3	Q9UJF2-2
X6RK58	Q13043	Q9H410	Q9H6R4
Q9NRZ9	Q9BY11	P13667	A0A087X211
Q13232	P04062	P18669	Q70EL4
Q9BZD4	F5H7W8	Q13753	Q8NDT2
G3V5R9	E9PDF6	Q9Y4H2	Q96SN8
P13798	Q08AD1-2	E7EX92	P09382
P13746	A4D1U4	Q7Z333	Q5T440
P04066	Q96Q83	P41208	Q9UL26
E9PC47	Q9H0U3	F5H5D3	Q8IX90
Q16778	Q5VWZ2	Q8NBM4	Q5JVZ5
Q9H2H9	P26440	O15347	Q9Y3Q8
C9JQS9	P55199	P51668	O00443
P61204	A0A087X295	P63146	Q9UJW0
C9JG87	Q71UM5	Q9NRZ9	Q03701
J3KN13	P26572	K7ELE3	P09012
E7ENY0	Q6WKZ4	Q9BZD4	O43683
Q9BZE4	Q3LXA3	G3V5R9	P29353
A4D1P6	Q9H410	Q8TAM2	O95793
Q9NQH7	P13667	P13798	O75054
E7EPW5	P18669	P13746	A0A0D9SFF8
H7BXI1	Q13753	P04066	F6WR09
Q9BYN0	Q9Y4H2	E9PC47	Q16658
Q96DI7	Q7Z333	Q16778	Q9NX31
Q7L8L6	P41208	Q9H2H9	Q9NR45
Q9BV57	F5H5D3	C9JQS9	P50914
P14174	Q8NBM4	P61204	Q9BW27
Q9BVS5	O15347	C9JG87	Q9Y4P8
Q99459	P51668	E7ENY0	P07900
cRAP087	P63146	A6NMT1	Q9NUI1
P43487	Q9NRZ9	Q9BZE4	Q13885
Q7Z4H8	K7ELE3	A0A087X033	J3KNI1
Q96TC7	Q9BZD4	A4D1P6	Q92575
Q7Z4S6	G3V5R9	E7EPW5	P63220
Q6ZWT7	P13798	H7BXI1	Q96EY1
O60784	H3BTX7	Q96DI7	P27144
Q7Z2T5	P13746	A0A087X1Z0	Q9HC44
Q05086	P04066	Q7L8L6	Q05823
Q9BV40	E9PC47	Q9BV57	Q5VXN0
P09486	Q16778	P14174	Q1ED39
K7EMX1	Q9H2H9	Q99459	Q9NUJ3
Q9BRZ2	C9JQS9	cRAP087	P18206
Q16891-2	P61204	P43487	Q9NW64
A0A075B6E4	Q6ZVD8	Q7Z4H8	A6NN50
Q14244	C9JG87	A0A1W2PNY5	Q9NW68-2
Q6UW68	E7ENY0	Q96TC7	O43310-2
O15118	A6NMT1	Q7Z4S6	Q14156
Q9BR61	K7EJH8	Q6ZWT7	Q16531
Q9Y3M8	Q9BZE4	O60784	P31947
Q9NX18	A0A087WUW0	Q7Z2T5	Q5JSH3
Q8IYM2	A4D1P6	Q05086	A0A0C4DGA2
P00390	Q9NQH7	Q9BV40	Q8WXI9
O14713	E7EPW5	P09486	P24941
F8WAN9	O15075	O60486	P31946
G3V1N3	H7BXI1	Q9BRZ2	O15234
Q9Y2H0-1	Q96DI7	Q9H8W3	Q969T9
Q9H147	A0A087X1Z0	A0A0X1KG73	P56192
Q15464	Q7L8L6	Q16891-2	Q8WU79
O14562	Q9BV57	Q14244	A0A0C4DG33
Q15393	P14174	Q6UW68	Q8N612
P41227	Q9BVS5	Q9Y4C5	E9PGP6
Q7Z7C8	Q99459	C9JJQ5	B4DHE8
Q8NBI6	cRAP087	O15118	Q9BYD3
Q5T5P2	P43487	Q9BR61	Q9H3N1
Q13636	Q7Z4H8	Q9Y3M8	E7EU96
L0R6Q1	A0A1W2PNY5	Q9NX18	Q96ST3
A0A0J9YVP6	Q7Z4S6	P00390	K7ELG9
Q8NHP6	Q6ZWT7	P13674	P52565
P30492	O60784	F8WAN9	O00762
A0A0A0MRM9	Q7Z2T5	G3V1N3	P11908
U3KQ69	Q05086	Q9Y2H0-1	Q9H1B7
Q9Y624	Q9BV40	Q9H147	Q86VM9
A0A087WYR0	P09486	Q15464	Q02880
Q9BUZ4	K7EMX1	O14562	Q9UJU6
F5H269	Q9BRZ2	Q15393	A0A0U1RRK1
Q96S44	Q9H8W3	P41227	M0R3D6
P98173	A0A0X1KG73	Q8NBI6	P55072
P21964	Q16891-2	Q5T5P2	Q9BV73
J3QR07	A0A075B6E4	Q13636	Q14165
Q8IWR0	Q14244	L0R6Q1	Q9H832
Q7LG56	C9JJQ5	Q9Y653	Q5VTL8
P29350	O00712	A0A0J9YVP6	Q8IYW5
Q15836	O15118	Q8NHP6	O43278
Q8WUF5	Q9BR61	P30492	A0A024RCR6
P57081	Q9Y3M8	A0A0A0MRM9	Q8NFC6
Q6P5Z2	Q9NX18	A5PLL7	A0A0C4DGQ8
P26583	P00390	U3KQ69	F5GYW0
Q9Y3Z3	O14713	A0A087WYR0	Q8NBL1
P49792	F8WAN9	F5H269	E9PKG1
O75940	G3V1N3	Q15572	Q13438
M0R366	Q9Y2H0-1	Q96S44	Q15043
E9PHA2	Q9H147	P98173	Q3LIE7
Q8IXM6	Q15464	P21964	P23381
P82675	O14562	J3QR07	B8ZZ77
Q9NV31	Q15393	Q8IWR0	Q9UMX0
Q96F44	P41227	Q7LG56	J3KQ48
J3QTR3	Q8NBI6	P29350	P10155
X6RHX1	L0R6Q1	Q15836	D6RAA6
A0A0U1RRB3	A0A0J9YVP6	Q6UX53	K7ENL9
Q6UW02	Q8NHP6	Q8WUF5	P46100
Q9H7H0	P30492	P57081	E9PHV5
Q9BRX5	A0A0A0MRM9	Q6P5Z2	Q9Y2X3
O75165	E9PK91	P26583	Q15758
X6R9U5	U3KQ69	K7EIE8	J3KR44
A0A087WUQ6	Q9Y624	A0A1X7SBT4	Q96G03
Q9Y5N6	A0A087WYR0	Q9Y3Z3	O15381
Q02083	F5H269	P49792	Q99848
F8W809	Q96S44	O75940	C9JIZ6
A6NMQ1	P98173	M0R366	E7EVA0
Q14974	P21964	E9PHA2	Q5T0Z8
Q9Y224	J3QR07	P82675	Q9UNF0
P19367	Q8IWR0	Q9NV31	Q96N66
Q9H0A8	Q7LG56	Q96F44	P0DN79
Q9BYC5	P29350	J3QTR3	I3L2J0
P50991	Q15836	A0A0U1RRB3	E7EW49
Q15648	Q6UX53	Q16514	Q9NVP1
D6RHI9	Q8WUF5	Q6UW02	P49720
Q8TDH9	Q6P5Z2	Q9BRX5	C9JI98
Q9H211	P26583	O75165	Q96K17
Q9Y343	A0A1X7SBT4	A0A087WUQ6	Q9HBH0
Q9NYY8	Q9Y3Z3	Q02083	P53367
P33240	P49792	Q969F1	Q9C0I1
Q6PL18	O75940	F8W809	F6RFD5
P35998	M0R366	A6NMQ1	Q9UFG5
P12236	E9PHA2	Q14974	O43719
Q07864	Q8IXM6	Q9Y224	Q9P265
Q6AWC2	P82675	P19367	P21399
P29373	Q56NI9	Q9H0A8	Q9Y2L1
Q9H2C2	Q9NV31	Q9BYC5	Q9Y2U5
A0A1B0GUS7	Q96F44	P50991	A0A1W2PQV2
Q96RR4	J3QTR3	D6RHI9	P16989
Q9H0A0	A0A0U1RRB3	Q9NYY8	Q8WZA9
Q14435	Q6UW02	P33240	Q9NX58
Q96Q05	Q9BRX5	Q6PL18	P82650
Q04837	O75165	P35998	Q13617
Q8NAN2	A0A087WUQ6	P12236	O95391
Q9NR50	Q9Y5N6	Q07864	Q9NWQ9
Q13630	Q02083	P29373	Q4G0N4
E9PRJ8	F8W809	Q9H2C2	B5MC59
P18887	A0A087WYG2	A0A1B0GUS7	P21281
A0A087X0W8	A6NMQ1	Q96RR4	Q9NY93
Q9UBP9	Q14974	Q9H0A0	Q9H9Q2
O95747	Q9Y224	Q14435	B4DR61
O75882	P19367	Q96Q05	O43865
P11172	Q9UI46	Q04837	Q6P3W7
Q96T51	Q9H0A8	Q9NR50	Q13451
A0A0C4DFT8	Q9BYC5	Q13630	Q13740-2
P39687	P50991	E9PRJ8	H0YKT5
P49069	Q15648	P18887	J3KS15
O94885	D6RHI9	A0A087X0W8	Q8N3D4
Q5W0U4	Q8TDH9	Q9UBP9	Q92820
F5H3M2	Q8TDZ2	O95747	Q9UH65
Q9UJF2-2	Q9NYY8	P11172	A0A0G2JMZ8
Q9H6R4	P33240	Q96T51	Q96CS2
A0A087X211	Q6PL18	P39687	Q9P273
I3L4W9	P35998	P49069	Q96MW1
Q70EL4	P12236	P61601	G3V180
Q8NDT2	Q07864	O94885	Q9Y371
Q96SN8	P29373	F5H3M2	Q86X29
P09382	Q9H2C2	Q9UJF2-2	Q96RL1
Q5T440	U3KQL4	P80217	P29083
Q9UL26	Q96RR4	Q9H6R4	Q96T23
Q8IX90	Q9H0A0	A0A087X211	Q6DKJ4
Q5JVZ5	Q14435	Q70EL4	P62318
Q9Y3Q8	Q96Q05	Q8NDT2	O14662
O00443	Q04837	H0YHD0	M0R2A0
Q9UJW0	Q8NAN2	Q96SN8	Q9NXH9
Q03701	Q9NR50	P09382	P33176
P09012	Q13630	Q5T440	Q8N163
O43683	E9PRJ8	Q9UL26	Q8WXA3-1
P29353	P18887	Q8IX90	Q8NFF5
O95793	A0A087X0W8	Q5JVZ5	Q15629
O75054	Q9UBP9	Q9Y3Q8	Q9NUN5
A0A0D9SFF8	O95747	O00443	P80303
F6WR09	P11172	Q9UJW0	Q9NZ63
Q16658	Q96T51	Q03701	C9JW51
Q9BPY3	P39687	P09012	Q13017
Q9NX31	Q8NCR0-2	O43683	P35908
O14613	P49069	P29353	Q9Y2S7
Q9NR45	O94885	O95793	Q9UDY2
P50914	Q5W0U4	Q9H3C7	Q10471
Q9BW27	F5H3M2	O75054	Q9NTK5
Q9Y4P8	Q9UJF2-2	A0A0D9SFF8	Q8IX04
P07900	P80217	F6WR09	P39019
Q9NUI1	Q9H6R4	Q16658	Q15437
Q13885	A0A087X211	Q9NX31	E7EVX8
J3KNI1	Q70EL4	O14613	Q01433
Q92575	Q8NDT2	Q9NR45	Q12893
Q12923	H0YHD0	P50914	Q9Y3A3
P63220	Q96SN8	O75110	Q9Y5Y2
Q96EY1	P09382	Q9H3Q1	P10253
Q96L73	F5H5T2	Q9BW27	O43353
P27144	B4DY26	Q9Y4P8	A0A096LPI6
Q9HC44	Q6ZRQ5	A0A087X0B7	Q96QD5
Q05823	Q5T440	P07900	A2VDJ0
Q5VXN0	Q9UL26	Q9NUI1	Q8N884
O14939	Q8IX90	Q13885	Q9H000
Q1ED39	Q5JVZ5	J3KNI1	Q92542
P24592	Q9Y3Q8	Q92575	O15145
Q9NUJ3	O00443	Q12923	Q9UNQ0
P18206	Q9UJW0	P63220	Q92576
Q9NW64	F5H101	Q96EY1	P63000-2
A6NN50	Q03701	P27144	Q00169
K7EPN1	P09012	Q9HC44	Q9H6K1
Q9NW68-2	O43683	Q05823	O94985
O43310-2	P29353	Q5VXN0	Q9BSC4
Q14156	O95793	Q1ED39	Q13509
Q16531	Q9H3C7	Q8IUH3-3	Q6NUM9
P31947	O75054	Q9NUJ3	Q13283
Q5JSH3	A0A0D9SFF8	P18206	Q8WVC0
A0A0C4DGA2	F6WR09	Q9NW64	Q99523
Q8WXI9	Q16658	A6NN50	A0A0A0MTH3
P24941	C9JY04	H7C270	Q96BZ8
P31946	Q9BPY3	Q9NW68-2	A0A1B0GUA3
O15234	Q9NX31	Q9NYR9	Q8WUM0
Q969T9	Q9NR45	O43310-2	P36404
P56192	P50914	Q14156	Q99615
Q8WU79	O75110	Q16531	Q86UK7
A0A0C4DG33	Q9H3Q1	P31947	Q96FN4
Q8N612	Q9BW27	Q5JSH3	Q9UHR5
P33552	Q9Y4P8	O00483	O95551
E9PGP6	A0A087X0B7	A0A0C4DGA2	Q9UL15
B4DHE8	P07900	Q8WXI9	Q8WWI1-3
Q9UPY6	Q9NUI1	P24941	O60343
Q9BYD3	Q13885	P31946	Q9NSD9
Q9H3N1	J3KNI1	O15234	Q9BXW7
E7EU96	Q92575	Q969T9	P51610
Q96ST3	P63220	P56192	Q9Y5M8
K7ELG9	Q96EY1	Q8WU79	P11498
P52565	P27144	A0A0C4DG33	P04792
Q96MT1	Q9HC44	Q8N612	P31321
O00762	Q05823	P33552	Q9H3K6
P11908	Q5VXN0	E9PGP6	Q8IX01
P23511	Q1ED39	B4DHE8	S4R3Q9
Q9H1B7	Q9NUJ3	Q9BYD3	Q86Y39
Q86VM9	P18206	Q9H3N1	I3L2L5
Q02880	Q9NW64	E7EU96	Q13217
Q9UJU6	A6NN50	Q96ST3	B3KNS4
A0A0U1RRK1	A6NGG8	K7ELG9	Q7Z392
Q9NQ34	Q9NW68-2	P52565	A0AV96
M0R3D6	Q9NYR9	O00762	Q96II8
Q01105	O43310-2	P11908	O94952-1
P55072	Q14156	Q9H1B7	Q86W50
Q9BV73	Q16531	Q96BR9	F8VZJ2
Q14165	P31947	Q86VM9	P51648
Q9H832	Q5JSH3	F8VWK8	P17301
Q5VTL8	A0A0C4DGA2	Q9H4L7	P09601
Q8IYW5	Q8WXI9	Q02880	Q9BYK8
O43278	P24941	Q9UJU6	Q96PU8
A0A024RCR6	P31946	A0A0U1RRK1	O75131
Q8NFC6	O15234	M0R3D6	Q9NXH8
O15427	Q969T9	Q01105	P48960
A0A0C4DGQ8	P56192	P55072	Q9UQ84
Q8IYK4	Q8WU79	Q9BV73	P62070
E7EWM1	A0A0C4DG33	Q14165	P67775
F5GYW0	Q8N612	Q9H832	A0A0X1KG71
Q8NBL1	Q7L4E1	Q5VTL8	Q9GZQ3
E9PKG1	E9PGP6	Q8IYW5	H7C1I0
Q13438	B4DHE8	O43278	P15170-3
O43657	Q9BYD3	A0A024RCR6	Q8NBX0
Q15043	Q9Y256	Q8NFC6	Q8TF01
Q3LIE7	Q9H3N1	A0A0C4DGQ8	Q9NSV4
P23381	E7EU96	Q9NSA3	Q92520
B8ZZ77	Q96ST3	F5GYW0	A0A0A0MS54
Q9UMX0	K7EJD8	E9PN48	Q9UHY7
J3KQ48	K7ELG9	Q8NBL1	P56945
P10155	P52565	E9PKG1	P06132
D6RAA6	O00762	Q13438	A8MU27
K7ENL9	P11908	Q15043	P39656
P46100	Q9H1B7	Q3LIE7	Q9NR31
E9PHV5	Q86VM9	P23381	P62906
Q9Y2X3	F8VWK8	A0A0J9YXX5	P49327
Q15758	Q9H4L7	B8ZZ77	O60573
J3KR44	Q02880	Q9UMX0	Q8N2F6
Q96G03	Q9UJU6	J3KQ48	H0YIV4
O15381	Q96LL9	P10155	F5H5P2
Q99848	A0A0U1RRK1	D6RAA6	Q14669-2
C9JIZ6	M0R3D6	K7ENL9	Q9NZW5
E7EVA0	P55072	P46100	Q93050-1
H3BRB6	Q9BV73	E9PHV5	O94874
Q5T0Z8	Q14165	Q9Y2X3	H7C3Q6
Q9UNF0	Q9H832	Q15758	Q7L5D6
Q96N66	Q5VTL8	J3KR44	Q86Y13
P0DN79	Q8IYW5	Q96G03	Q9H8H2
I3L2J0	O43278	O15381	Q9P107
E7EW49	A0A024RCR6	Q99848	Q9NV96
J3QLK6	Q8NFC6	C9JIZ6	Q9UPN6
Q9NVP1	O15427	E7EVA0	Q9NZD2
P49720	A0A0C4DGQ8	Q9H7X7	Q86XP3
C9JI98	E7EWM1	Q5T0Z8	Q8N1B4
Q96K17	F5GYW0	Q9UNF0	Q5QNY5
Q9HBH0	Q8NBL1	Q96N66	C9JK83
P53367	E9PKG1	P0DN79	Q13405
Q9C0I1	Q13438	I3L2J0	E9PB61
F6RFD5	O43657	E7EW49	Q9H269
Q9Y4U1	Q15043	J3QLK6	Q70CQ2
Q9UFG5	Q3LIE7	Q9NVP1	Q13151
O43719	P23381	P49720	B4DY09
Q9P265	B8ZZ77	C9JI98	P42694
P21399	Q9UMX0	Q96K17	Q9BSQ5
Q9Y2L1	J3KQ48	Q9HBH0	Q8IZQ5
Q9Y5Q0	P10155	D3DTX6	A0A087WUD2
Q9Y2U5	D6RAA6	P53367	P38435
A0A1W2PQV2	K7ENL9	Q9C0I1	P30043
P16989	P46100	F6RFD5	O60518
Q8WZA9	E9PHV5	Q9UFG5	P62487
Q9NX58	Q9Y2X3	O43719	Q96HC4
P82650	Q15758	A0A0A0MSI2	Q9ULX6
Q13617	J3KR44	Q9P265	Q8NEF9
O95391	Q96G03	P21399	H3BMM9
Q9NWQ9	O15381	Q9Y2L1	F5GY90
Q4G0N4	Q99848	M0R3D4	P06753-5
B5MC59	C9JIZ6	Q9Y2U5	P55145
P21281	E7EVA0	A0A1W2PQV2	C9J0Q5
Q9NY93	Q9H7X7	O96007	Q7L7X3
Q9H9Q2	Q5T0Z8	P16989	Q96PE3
B4DR61	J3KR05	Q8WZA9	O95714
O43865	Q9UNF0	Q9NX58	Q5QNW6
Q6P3W7	Q96N66	P82650	Q93034
Q13451	P0DN79	Q13617	Q7Z417
Q13740-2	I3L2J0	O95391	Q9NQX3
H0YKT5	E7EW49	Q9NWQ9	Q9UNX4
J3KS15	Q9NVP1	Q4G0N4	P02533
Q8N3D4	P49720	B5MC59	O15056
C9IYZ1	C9JI98	P21281	Q00535
Q92820	Q96K17	Q9NY93	Q9ULT8
Q9UH65	Q9HBH0	Q9H9Q2	Q86W92-4
A0A0G2JMZ8	D3DTX6	B4DR61	Q9UBE0
Q96CS2	P53367	O43865	D6RIY6
Q9P273	Q9C0I1	Q6P3W7	O95059
Q96MW1	F6RFD5	Q13451	Q9Y263
Q9NRY2	Q9UFG5	Q13740-2	Q9UJX3
Q9BQ48	O43719	H0YKT5	P82094
G3V180	A0A0A0MSI2	J3KS15	Q9Y6X5
Q9BUL5	Q9P265	Q8N3D4	Q9UNH7
Q9Y371	H0YJT9	H3BME4	E7EN96
Q86X29	P21399	Q92820	Q2NL82
Q96RL1	Q9Y2L1	Q9UH65	A0A087X0X3
O95342	Q9Y5Q0	A0A0G2JMZ8	O75676
P29083	M0R3D4	Q96CS2	O75818
O95997	Q9Y2U5	Q9P273	A0A087WZU8
Q96T23	A0A1W2PQV2	Q96MW1	Q99808
Q6DKJ4	O96007	G3V180	Q5T8P6
Q96CB8	P16989	Q9Y371	Q14674
P62318	Q8WZA9	Q86X29	P36507
O14662	Q9NX58	Q14676	P46821
M0R2A0	P82650	Q96RL1	O00429
Q9NXH9	Q13617	P29083	J3KRX5
P33176	O95391	O95997	Q14137
Q8N163	Q9NWQ9	Q96T23	Q9Y2R4
Q8WXA3-1	Q4G0N4	Q6DKJ4	Q96AC1
Q8NFF5	B5MC59	Q96CB8	Q96P11
Q96GX2	P21281	P62318	C9JG97
Q15629	Q9NY93	O14662	Q9UNF1
Q9NUN5	Q9H9Q2	M0R2A0	Q99747
P80303	B4DR61	Q9NXH9	P26640
Q9NZ63	O43865	P33176	P61513
B0QY29	Q6P3W7	Q8N163	Q9Y617
C9JW51	Q13451	Q8WXA3-1	Q15363
Q13017	Q13740-2	Q8NFF5	F5H5V4
F8VXD5	H0YKT5	Q15629	G3V0I5
P35908	J3KS15	F8W8Z9	O75116
Q9Y2S7	Q8N3D4	Q9NUN5	O75394
G3V325	H3BME4	P80303	O75694
Q9Y6M4-4	Q92820	Q9NZ63	Q01581
Q9UDY2	Q9UH65	H3BQQ2	Q86Y07
Q10471	A0A0G2JMZ8	C9JW51	P30622-2
Q9NTK5	Q96CS2	Q13017	Q99871
Q2KHM9	Q9P273	F8VXD5	Q9UBP0
H0Y5F2	Q96MW1	P35908	Q7L2H7
Q8IX04	Q9BQ48	Q9Y2S7	Q92522
P39019	G3V180	G3V325	P49802
Q15437	Q9Y371	B0QYH3	Q9BRJ6
E7EVX8	Q86X29	Q9UDY2	P18615
Q01433	Q14676	Q5T0A6	Q92989
Q12893	Q96RL1	Q10471	P25787
U3KQS0	P29083	Q9NVH6	Q15545
Q9Y3A3	Q96T23	Q9NTK5	A0A088AWN3
Q6ZYL4	Q6DKJ4	Q2KHM9	O43765
Q9Y5Y2	Q8N5I4	Q8IX04	C9JM79
P10253	P62318	P39019	Q13637
O43353	O14662	Q15437	O75592
A0A096LPI6	M0R2A0	E7EVX8	Q8ND56
Q96QD5	Q9NXH9	Q01433	P08559
Q96C24	P33176	Q12893	Q13200
A2VDJ0	Q8N163	Q9Y3A3	Q9UBS0
Q8N884	Q8WXA3-1	Q9Y5Y2	O14734
P48723	Q8NFF5	P10253	C9JFR7
Q9H8M2	Q96GX2	O43353	Q9NQ29
Q9H000	Q15629	A0A096LPI6	Q9H6E4
Q9UHB7	Q8NFH8	Q96QD5	A0A096LP22
Q92542	F8W8Z9	A2VDJ0	Q8WVS4
O15145	Q9NUN5	Q8N884	Q14247
Q9UNQ0	P80303	Q9H8M2	P28288
Q92576	Q9NZ63	Q9H000	O95486
P63000-2	H3BQQ2	Q92542	Q9UPQ9
Q00169	B0QY29	O15145	P27708
Q9H6K1	C9JW51	Q9UNQ0	O95400
O94985	Q13017	Q92576	Q5W0H4
Q9BSC4	P35908	P63000-2	Q6DKI1
Q13509	Q9Y2S7	O95379	Q96HQ2
Q6NUM9	B0QYH3	Q00169	Q13137
Q13283	Q9UDY2	Q9H6K1	Q8NEV8
Q8WVC0	Q10471	O94985	Q96DU7
Q99523	Q9NTK5	Q9BSC4	B0QZ18
A0A0A0MTH3	P09958	S4R3B5	P61077
Q96BZ8	Q8IX04	Q13509	O75179
A0A1B0GUA3	P39019	Q6NUM9	P36405
P54284	Q15437	Q13283	Q6P6C2
Q8WUM0	E7EVX8	Q8WVC0	Q9H0C8
P36404	Q01433	Q99523	O43399
H3BM52	Q12893	A0A0A0MTH3	P46939
Q99615	Q9Y3A3	Q96BZ8	C9JQ41
Q86UK7	Q6ZYL4	A0A1B0GUA3	Q8IUC4
Q96FN4	Q9Y5Y2	Q8WUM0	Q9GZY8-2
J3KPT4	P10253	P36404	O15230
Q504Q3	O43353	Q99615	O15121
Q9UHR5	A0A096LPI6	Q86UK7	P61081
O95551	Q9H9Y4	Q96FN4	Q9HC35
Q9UL15	Q96QD5	J3KPT4	Q96QU8
Q8WWI1-3	Q96C24	Q9UHR5	Q9BZG1
O60343	A2VDJ0	O95551	E9PNK6
Q9NSD9	Q8N884	Q9UL15	Q15050
Q9BXW7	P48723	Q8WWI1-3	Q9GZR7
P51610	Q9H000	O60343	Q14764
Q9Y5M8	Q92542	Q9NSD9	H3BRV9
P11498	O15145	Q9BXW7	Q49A88
B7Z3R2	Q96LT9	P51610	K7EIN2
P04792	Q9UNQ0	Q9Y5M8	Q9NPD8
P31321	Q92576	P11498	P62328
A0A096LNZ9	P63000-2	P04792	O15160
K7EK35	O95379	P31321	Q9UHI6
Q9H3K6	Q00169	K7EK35	Q14790
Q8IX01	Q9H6K1	A0A087X060	Q86UE8
S4R3Q9	O94985	Q9H3K6	E9PLR7
Q86Y39	E9PE82	Q8IX01	Q9H5V9
I3L2L5	Q9BSC4	S4R3Q9	P46109
Q13217	H0YKL4	Q86Y39	O95470
B3KNS4	S4R3B5	Q96HB5	P16333
Q7Z392	C9J7I0	I3L2L5	Q9HBH5
O60353	Q13509	Q9Y2H1	A0A087WYT3
A0AV96	Q6NUM9	Q13217	Q5MNZ6
Q96II8	Q13283	B3KNS4	O95361
O94952-1	Q8WVC0	Q9NUP7	Q92947
Q86W50	Q99523	Q7Z392	Q8WVP7
F8VZJ2	A0A0A0MTH3	Q9Y508	Q8WUA2
P51648	Q96BZ8	O60353	Q86V48
P17301	A0A1B0GUA3	A0AV96	P07858
P09601	P54284	Q96II8	Q9BQ70
Q9BYK8	Q8WUM0	O94952-1	Q2M1P5
Q96PU8	P36404	Q86W50	Q99436
O75131	H3BM52	E7EWX8	Q9Y6I3
Q9NXH8	Q99615	A2RU67	Q7RTV0
P48960	Q86UK7	F8VZJ2	Q15746
Q9UQ84	Q96FN4	P51648	A0A1W2PNW1
P62070	Q504Q3	P17301	Q5T4B2
A6NDI8	Q9UHR5	Q5T321	E5RGR0
P67775	O95551	P09601	P46783
D6RAJ6	Q9UL15	Q9BYK8	P49589-3
A0A0X1KG71	Q8WWI1-3	Q96PU8	A0A0A0MRX1
Q9BZD2	O60343	Q96SW2	Q6WCQ1
Q9GZQ3	Q9NSD9	O75131	Q9ULP9
H7C1I0	Q9BXW7	Q9NXH8	P49770
P15170-3	P51610	P48960	Q9BQ69
H7C327	Q9BXJ8	Q9UQ84	Q9BW61
Q8NBX0	Q9Y5M8	P62070	Q8IWZ8
Q8TF01	P11498	P67775	P15954
Q9NSV4	U3KPX1	A0A0X1KG71	B1AJY5
Q92520	P04792	Q9GZQ3	M0R0H5
B5MC47	P31321	H7C1I0	Q02878
A0A0A0MS54	A0A096LNZ9	P15170-3	Q9UL18
H0YNW7	A0A087X060	Q8NBX0	Q8N201
A0A087WT92	Q9H3K6	Q8TF01	Q6VMQ6
Q9UHY7	Q8IX01	Q9NSV4	P22061
P56945	S4R3Q9	Q8WV99	Q3B7J2
P06132	Q86Y39	Q92520	Q96CW5
A8MU27	Q96HB5	A0A0A0MS54	J3KNN7
P39656	I3L2L5	Q9UHY7	O75150
Q9NR31	Q9Y2H1	P56945	P61764
P62906	Q13217	A0A0C4DFP4	Q96GG9
Q9UK61	B3KNS4	P06132	P15586
P49327	Q7Z392	A8MU27	Q96JQ2
O60573	Q9Y508	P39656	P49903
Q8N2F6	A0AV96	Q9NR31	O43294
H0YIV4	Q96II8	P62906	P11279
F5H5P2	O94952-1	P49327	O00161
Q14669-2	Q86W50	O60573	Q9HB07
H3BV03	F8VZJ2	Q8N2F6	Q16270
Q9NZW5	P51648	H0YIV4	P50613
Q93050-1	Q05084	F5H5P2	Q8NCF5
O94874	P17301	Q14669-2	P36957
H7C3Q6	P09601	Q9NZW5	Q6IQ49
Q7L5D6	Q9BYK8	Q93050-1	F8VTV8
Q86Y13	D6RB83	O94874	Q9UEY8-2
Q9H8H2	Q96PU8	H7C3Q6	A0A0C4DGA7
Q9P107	O75131	Q7L5D6	Q9Y5V0
Q9NV96	Q9NXH8	Q86Y13	P28676
Q9UPN6	P48960	Q9H8H2	Q9UBV8
Q9NZD2	Q9UQ84	Q9P107	Q9UN86
Q86XP3	P62070	Q9NV96	F2Z2U4
Q8N1B4	P67775	Q9UPN6	B4E0K5
P40189	A0A0X1KG71	Q9NZD2	H7C2N1
Q5QNY5	Q9GZQ3	Q9NWF9	Q9UK39
C9JK83	H7C1I0	Q9NX61	Q5TC82
Q13405	P15170-3	Q86XP3	Q6P158
E9PB61	Q8NBX0	Q8N1B4	Q9Y383
Q9H269	Q8TF01	Q5QNY5	O43299
Q70CQ2	Q9NSV4	C9JK83	Q9C037
Q13151	Q9Y5X9	E7EQ64	Q92968
B4DY09	Q9BWH2	Q13405	P52789
P42694	Q8WV99	E9PB61	Q9H2P0
Q9BSQ5	Q92520	Q9H269	Q9HBM6
Q13395	A0A0A0MS54	Q70CQ2	P67936-2
Q8IZQ5	H0YNW7	Q13151	P25786
A0A087WUD2	Q9UHY7	B4DY09	Q8ND04
P38435	P56945	P42694	Q9BPX5
P30043	A0A0C4DFP4	Q9BSQ5	Q9UEU0
O60518	P06132	Q9P2S5	F5H5I6
P62487	A8MU27	Q13395	Q9UBT2
Q96HC4	P39656	O95081	F5H2F4
Q96T58	Q9NR31	Q8IZQ5	Q5QPM7
Q9ULX6	P62906	Q8TEQ8	Q9NQ48
P30405	Q9UK61	A0A087WUD2	Q9NVT9
Q8NEF9	P49327	P38435	P61962
Q9UGU0	O60573	P30043	P11233
H3BMM9	Q8N2F6	O60518	Q86TU7
F5GY90	H0YIV4	P62487	Q15334
P06753-5	F5H5P2	Q96HC4	P59998
P55145	Q14669-2	Q9ULX6	Q6NSJ5
P30679	Q9NZW5	P30405	Q9NWH9
C9J0Q5	Q93050-1	Q8NEF9	Q04637
Q96PV7	O94874	Q9UGU0	Q8TDR0
Q7L7X3	H7C3Q6	H3BMM9	P61086
P10109	Q7L5D6	H3BNK2	H3BP13
Q96PE3	Q86Y13	F5GY90	Q15554
O95714	Q9H8H2	P06753-5	Q9NRN7
Q96R05	Q9P107	P55145	Q05397
Q5QNW6	Q9NV96	E5RFJ1	Q92585
Q93034	Q9UPN6	P30679	F5GZ97
Q7Z417	Q9NZD2	C9J0Q5	Q8WZA0
Q9NQX3	Q9NWF9	Q96PV7	Q9H2C0
Q9UNX4	Q86XP3	Q7L7X3	O15460
Q8NCN5	Q8N1B4	Q96PE3	O75390
P02533	P40189	O95714	Q8NDV7
O15056	Q5QNY5	Q96R05	J3KS05
Q00535	C9JK83	Q5QNW6	O95352
E9PH99	E7EQ64	Q93034	P11182
Q9ULT8	Q13405	Q7Z417	Q14457
C9JR67	E9PB61	Q9NQX3	A0A0C4DGG9
Q86W92-4	Q9H269	Q9UNX4	Q5TGY3
Q9UBE0	Q70CQ2	P02533	Q15007
D6RIY6	Q13151	O15056	P09936
O95059	B4DY09	Q00535	F8W9X7
Q9Y263	P42694	Q9ULT8	M0QXF9
Q9UJX3	Q9BSQ5	Q86W92-4	E5RK75
P82094	O95081	Q9UBE0	Q8IYB3
Q9Y6X5	Q9P2K3	D6RIY6	Q12872
Q9UNH7	Q8IZQ5	O95059	Q9BZF3
E7EN96	Q8TEQ8	Q9Y263	Q8TAD4
Q2NL82	A0A087WUD2	Q9UGK3	Q99536
A0A087X0X3	P38435	Q9UJX3	O95456
O75676	P30043	P82094	Q16698
O75818	O60518	Q9Y6X5	P04233-2
A0A087WZU8	P62487	Q9UNH7	A0A0G2JIW1
Q99808	Q96HC4	E7EN96	Q15046
Q5T8P6	Q9ULX6	Q2NL82	Q60I27
Q14674	Q8NEF9	A0A087X0X3	Q5VY60
P36507	H3BMM9	O75676	P54819
Q86UY8	F5GY90	O75818	Q9Y4C2
P46821	O60513	A0A087WZU8	P31150
Q9H8M9	F8VUD2	Q99808	P55212
O00429	P06753-5	Q5T8P6	Q9H857-2
Q9GZR1	P55145	G5E979	F5GY05
J3KRX5	E5RFJ1	Q8NAT1	O95831
Q14137	C9J0Q5	Q14674	O95394
H0YNG5	Q7L7X3	P36507	Q8IWE2
Q13795	Q96PE3	P46821	P51003
Q9Y2R4	O95714	O00429	O00178
Q96AC1	Q5QNW6	Q8N5S9	P42766
Q96P11	Q93034	I3L1I3	Q16629
C9JG97	Q7Z417	J3KRX5	P47755
Q9UNF1	Q9NQX3	Q14137	O00115
Q99747	Q9UNX4	Q9Y2R4	A0A024R571
P26640	P02533	Q96AC1	P04350
Q9BUE6	Q16659	A0A087WWH3	P78318
P61513	O15056	Q96P11	Q8WUQ7
Q9Y617	Q00535	C9JG97	P60866
Q15363	Q9NTG7	Q9UNF1	M0R2B7
F5H5V4	E9PH99	Q99747	Q15181
G3V0I5	Q9ULT8	P26640	A0A1B0GW68
O75116	Q86W92-4	P61513	E5RI52
O75394	Q9UBE0	Q9Y617	Q96K76
Q9H6L4	D6RIY6	Q15363	Q8WUH6
O75694	O95059	F5H5V4	Q6NS38
Q01581	Q9Y263	G3V0I5	Q53H96
Q86Y07	Q9UGK3	O75116	Q5JPE7
P30622-2	Q9UJX3	O75394	Q9Y448
Q99871	P82094	O75694	Q9H0V9
Q9UBP0	Q9Y6X5	O75815	Q8IUF1
Q7L2H7	Q9UNH7	Q01581	P19022
Q92522	E7EN96	Q86Y07	Q9H0S4
P49802	Q2NL82	P30622-2	P00966
Q9BRJ6	A0A087X0X3	O96020	Q8IVD9
P18615	O75676	Q99871	Q9UKA4
Q92989	O75818	Q9UBP0	Q15785
P25787	A0A087WZU8	Q7L2H7	E5RIH5
Q15545	Q99808	Q92522	P49207
A0A088AWN3	Q5T8P6	P49802	Q9UK76
O43765	Q9H9G7	Q9BRJ6	P30040
Q8NI60	Q14674	P18615	Q08J23
C9JM79	P36507	Q92989	H0Y5K5
Q13637	Q9GZV1	Q6Q759	P18859
O75592	P46821	P25787	Q96PK6
Q8ND56	O00429	Q9H204	O43896
P08559	Q9GZR1	Q15545	O43615
Q13200	I3L1I3	A0A088AWN3	P16989-2
Q969R8	J3KRX5	O43765	P62253
Q9UBS0	E7EX20	C9JM79	Q5T1B5
O14734	Q14137	Q13637	C9JYQ9
C9JFR7	P63272	O75592	Q14444
Q9NQ29	Q13795	Q8ND56	P48507
Q9H6E4	Q9Y2R4	Q5T2W1	Q99496
D6REA0	Q96AC1	P08559	F8VXU5
A0A096LP22	Q96P11	Q13200	P08727
Q8WVS4	C9JG97	Q9UBS0	Q8IWV8
O43852-4	Q9UNF1	O14734	Q9HBI1
Q14247	Q99747	C9JFR7	Q9HCN8
P28288	P26640	Q9NQ29	Q9Y6E2
O95486	Q9BUE6	P03905	O60610
Q9UPQ9	P61513	Q9H6E4	Q9UKL0
Q9Y450-2	Q9Y617	D6REA0	O60269
P27708	Q15363	A0A096LP22	J3KNF4
O95400	F5H5V4	Q8WVS4	Q02338
Q5W0H4	G3V0I5	Q9NXA8	H7C1N3
Q6DKI1	O75116	Q14247	Q05932
Q96HQ2	O75394	E9PSH3	Q8N684
Q13137	Q9H6L4	P28288	P04899
Q8NEV8	O75694	O95486	Q02252
Q96DU7	Q01581	Q9UPQ9	P09972
B0QZ18	Q86Y07	Q9Y450-2	P41743
P61077	P30622-2	P27708	P50895
O75179	O96020	O95400	O75530
P36405	Q99871	Q5W0H4	Q9BY77
Q6P6C2	P78540	K7EM46	Q9P0L0
Q9H0C8	Q9UBP0	Q6DKI1	K7EKI8
O43399	Q7L2H7	Q96HQ2	Q9BRT9
Q92844	Q92522	Q13137	Q86XK3
P46939	P49802	Q8NEV8	Q0VDF9
C9JQ41	Q9BRJ6	Q96DU7	Q9NYQ6
Q8IUC4	P18615	B0QZ18	E7EX17
Q9GZY8-2	Q92989	P61077	Q9H270
O15230	P25787	O75179	H0Y4R1
O15121	Q9H204	P36405	Q9NP72
P61081	Q15545	Q5JTJ3	Q5EBL8
Q86SQ0-3	A0A088AWN3	Q6P6C2	Q5VT52
Q9HC35	O43765	Q9H0C8	Q7Z434
P43353	C9JM79	O43399	Q96GD4
Q96QU8	Q13637	P46939	Q5TDF0
Q9BZG1	O75592	C9JQ41	V9GYM8
E9PNK6	E9PIA0	Q8IUC4	O14757
Q15050	Q8ND56	Q9GZY8-2	Q8NCC3
Q9GZR7	Q5T2W1	O15230	O94966-5
Q14764	P08559	O15121	P07942
H3BRV9	Q13200	P61081	Q9BRR8
Q49A88	Q9UBS0	Q9HC35	P42575
K7EIN2	O14734	Q96QU8	Q99487
Q9NPD8	C9JFR7	Q9BZG1	G3V3E8
P62328	Q9NQ29	E9PNK6	O43175
O15160	P03905	Q15050	A0A087WXS7
Q14728	Q9H6E4	Q9GZR7	P42126
Q9UHI6	A0A096LP22	Q14764	Q8TE02
Q14790	Q8WVS4	H3BRV9	Q9NVI7-2
Q86UE8	Q14247	Q49A88	Q9H944
E9PLR7	P28288	Q9BSF4	Q9Y4P3
Q9H5V9	O95486	K7EIN2	Q8TCJ2
P46109	Q9UPQ9	Q9NPD8	Q8IW35
O95470	P27708	P62328	Q13098
P16333	O95400	O15160	Q96GC5
Q9HBH5	Q5W0H4	Q9UHI6	P55036
A0A087WYT3	Q6DKI1	Q14790	Q9NUG6
Q5MNZ6	Q96HQ2	Q86UE8	Q9UJ83
O95361	Q13137	E9PLR7	A0A0J9YXF2
Q92947	A6QL64	Q9H5V9	Q9Y4L1
Q8WVP7	Q8NEV8	P46109	O95861
Q8WUA2	Q96DU7	B0YJ81	Q8IWX8
Q86V48	B0QZ18	O95470	Q7L0Y3
P07858	P61077	P16333	E7ETK0
Q9BQ70	O75179	Q9HBH5	P35790
Q9BV94	P36405	A0A087WYT3	Q14739
Q2M1P5	Q5JTJ3	Q5JZH3	Q86U44
Q99436	O75509	Q5MNZ6	Q6P3X3
Q9Y6I3	Q6P6C2	O95361	O43390
O95900	Q9BQ51	Q92947	P50995
Q7RTV0	Q9H0C8	Q8WVP7	O75356
Q15746	O43399	Q8WUA2	Q92692
Q86UB9	Q92844	P49761-1	Q9H4L5
A0A1W2PNW1	P46939	A6NDK9	Q12765
Q5T4B2	Q99967	Q86V48	P28072
E5RGR0	C9JQ41	P07858	O75822
P46783	Q8IUC4	Q9BQ70	Q86W56
P49589-3	Q9GZY8-2	Q2M1P5	P57772
J3KS54	O15230	Q99436	Q5SW79
A0A0A0MRX1	O15121	Q9Y6I3	A0A0G2JPP5
Q6WCQ1	P61081	Q15323	A1A4S6
Q9ULP9	Q9HC35	Q7RTV0	E9PBE1
P49770	P43353	Q86VQ1	Q04760
Q9Y5G0	Q96QU8	Q15746	Q9NZD8
Q9BQ69	Q9BZG1	A0A1W2PNW1	Q92673
Q8N138	E9PNK6	Q5T4B2	P61964
Q9BW61	Q15050	Q9ULJ7	P35221
Q7Z6M4	Q9GZR7	E5RGR0	P62314
Q8IWZ8	Q14764	P46783	Q9NTX5
P15954	H3BRV9	Q96MD7-1	Q8TBC4
B1AJY5	Q49A88	P49589-3	Q13951
Q8WYQ9	K7EIN2	A0A0A0MRX1	P46937
M0R0H5	Q9NPD8	Q6WCQ1	A0A0A0MTS2
Q02878	P62328	Q9ULP9	Q92979
Q9UL18	O15160	Q969E2	Q96RT1
Q8N201	Q14728	P49770	V9GZ56
Q6VMQ6	Q9UHI6	Q13111	P48147
P22061	Q14790	Q9BQ69	Q9NPD3
Q3B7J2	Q86UE8	Q9BWT3	P46108
Q96CW5	E9PLR7	Q8N138	Q12834
J3KNN7	Q9H5V9	Q9BW61	A2ABF8
O75150	P46109	Q8IWZ8	Q8IXQ3
P61764	O95470	P15954	O75874
Q96GG9	P16333	B1AJY5	F5H2X7
P15586	Q9HBH5	M0R0H5	D6RJ90
Q96JQ2	A0A087WYT3	Q02878	Q9P2I0
P49903	Q5MNZ6	Q9UL18	P52756
O43294	O95361	Q8N201	A0A096LP25
P11279	Q92947	Q6VMQ6	Q8IYA6
O00161	Q8WVP7	P22061	P49915
Q9HB07	Q8WUA2	Q3B7J2	Q5GLZ8
Q16270	A6NDK9	Q96CW5	Q96JH7
P50613	P49184	J3KNN7	A0JNW5
Q8NCF5	Q86V48	O75150	P62316
P36957	P07858	P61764	Q5BJF6
B7WP74	Q9BQ70	Q96GG9	F8W7C6
Q6IQ49	Q9BV94	P15586	P62277
F8VTV8	Q2M1P5	Q96JQ2	Q9NT62
Q9UEY8-2	Q99436	P49903	A0A0A0MRI1
Q7Z7K6	Q9Y6I3	O43294	Q9UIC8
A0A0C4DGA7	Q7RTV0	P11279	Q86WA8
Q9Y5V0	Q15746	M0QXT0	Q86YS6
Q5T3J3	Q86UB9	O00161	O60551
P28676	A0A1W2PNW1	Q9HB07	Q9BRV8
F5H0R1	Q5T4B2	Q16270	P20618
Q9UBV8	Q9ULJ7	Q13769	A0A087X0M4
Q9UN86	E5RGR0	P50613	A0A0A0MRM8
F2Z2U4	P46783	Q9Y6G3	O43583
B4E0K5	P49589-3	Q8NCF5	Q9Y620
H7C2N1	A0A0A0MRX1	P36957	Q5SQP8
Q9UK39	Q6WCQ1	Q6IQ49	P45985
Q5TC82	Q9ULP9	F8VTV8	P43246
H7BZK6	Q969E2	Q9UEY8-2	O43818
Q6P158	P49770	A0A0C4DGA7	Q03518
Q9Y383	Q13111	Q9Y5V0	P67870
O43299	Q9BQ69	P28676	Q9BSJ8
Q9C037	Q9BWT3	Q96CV9	P06493
Q92968	Q9BW61	Q9UBV8	Q9H9B1
P52789	Q7Z6M4	E9PC69	Q9HD15
Q9NSG2	Q8IWZ8	Q9UN86	Q86Y82
Q3V6T2	P15954	F2Z2U4	Q9P2B4
Q9H2P0	B1AJY5	B4E0K5	Q7Z7H5
Q9HBM6	M0R0H5	H7C2N1	Q96RF0
P67936-2	Q02878	Q9UK39	P41567
P25786	Q9P0K8	Q5TC82	P35580
O95476	Q9UL18	Q6P158	Q9UNP9
Q8ND04	Q8N201	Q9Y383	P07948
Q9BPX5	Q6VMQ6	F8VQD9	P18085
Q9UEU0	P22061	Q9NX01	P34897
H0YKV4	Q3B7J2	O43299	P78537
F5H5I6	Q96CW5	Q9C037	Q5VYS8
Q9UBT2	J3KNN7	Q92968	F6WH68
F5H2F4	O75150	P52789	O75376
Q5QPM7	P61764	Q12800	Q9H1A3
Q9NQ48	Q96GG9	Q9H2P0	Q9NZU5
P98160	P15586	Q13901	Q9Y490
Q8NF91	Q96JQ2	A0A0B4J220	P39060
Q9NVT9	P49903	Q9HBM6	Q86V21
P61962	O43294	P67936-2	Q9Y3U8
P11233	P11279	P25786	Q9NX08
Q86TU7	M0QXT0	Q8ND04	P04626
Q15334	O00161	Q9UJA3	Q99460
E9PIR9	Q9HB07	Q9BPX5	H0YNG3
P59998	Q16270	Q9UEU0	P52292
Q6NSJ5	Q13769	F5H5I6	Q99640
Q9NWH9	P50613	Q9UBT2	P42771
Q04637	Q8NCF5	F5H2F4	Q9Y2S6
Q8TDR0	P36957	Q5QPM7	P61106
P61086	B7WP74	Q9NQ48	Q86VN1
H3BP13	Q6IQ49	I3L473	P21333
Q15554	F8VTV8	Q16584	P60520
P14859	Q9UEY8-2	Q9NVT9	Q9Y6M9
Q9NRN7	Q7Z7K6	P61962	P20337
K7EKV6	A0A0C4DGA7	P11233	P62917
Q05397	Q9Y5V0	Q86TU7	P00403
Q92585	P28676	Q15334	P50402
F5GZ97	Q96CV9	E9PIR9	P49419-2
Q8WZA0	Q9UBV8	P59998	Q9H081
Q9H2C0	E9PC69	Q6NSJ5	P52948
O15460	Q9UN86	Q9NWH9	P62241
O75390	F2Z2U4	Q04637	P51148
Q8NDV7	Q9BZZ5	Q8TDR0	Q8TAT6
J3KS05	B4E0K5	P61086	Q9Y5P6
O95352	H7C2N1	H3BP13	Q9BRT6
P11182	Q9UK39	Q15554	P51397
Q14457	Q5TC82	Q9NRN7	O60763
A0A0C4DGG9	H7BZK6	Q8IVG5	Q9UII4
Q5TGY3	Q6P158	Q05397	Q9UHY1
Q15007	Q9Y383	Q92585	Q15121
P09936	F8VQD9	F5GZ97	Q13425
F8W9X7	Q9NX01	Q8WZA0	O75937
M0QXF9	O43299	Q9H2C0	P23229-6
E5RK75	Q9C037	O15460	Q9Y5S9
Q8IYB3	Q92968	O75390	O00422
Q12872	P52789	Q8NDV7	Q15020
Q9BZF3	O43257	J3KS05	Q92922
Q8TAD4	Q9H2P0	O95352	Q7KZI7
Q99536	Q13901	P11182	Q8IZP0-9
O95456	A0A0B4J220	P35626	Q8TF72
Q16698	Q9HBM6	Q14457	Q9BRK4
P04233-2	P67936-2	A0A0C4DGG9	Q8IVT2
A0A0G2JIW1	P25786	A0A1W2PP11	Q96CW1
Q15046	A0A087WZ50	Q5TGY3	Q5QP56
Q60I27	Q8ND04	Q15007	Q08257
Q5VY60	Q9UJA3	P09936	O43488
P54819	Q9BPX5	F8W9X7	P14927
O95169	Q9UEU0	M0QXF9	Q8IZL8
Q9Y4C2	H0YKV4	E5RK75	Q13595
P31150	F5H5I6	Q8IYB3	P43034
P55212	Q9UBT2	Q12872	Q14318
Q7RTS9	F5H2F4	Q9BZF3	Q9Y4F5
Q9H857-2	Q5QPM7	Q96GC6	Q9NS69
Q9NYT0	Q9NQ48	Q8TAD4	Q15386
F5GY05	P98160	Q99536	Q9C0E2
O95831	I3L473	O95456	Q9UMZ2
O95394	Q16584	Q16698	Q9GZP4
Q8IWE2	Q9NVT9	P04233-2	O75330
P51003	P61962	A0A0G2JIW1	Q13443
O00178	P11233	Q15046	F5GWN5
O60507	Q86TU7	G5E9C2	P25205
Q9Y244	Q15334	Q60I27	P34949
P42766	P59998	Q5VY60	Q9Y619
F5H3H7	Q6NSJ5	P54819	Q9HAW4
Q16629	Q9UBB5	O95169	Q92878
Q6PCD5	Q9NWH9	Q9Y4C2	Q16537
P47755	Q04637	P31150	Q15813
O00115	Q8TDR0	P55212	A0A1W2PRL5
A0A024R571	P61086	Q9H857-2	Q9H3H3
P04350	H3BP13	F5GY05	Q9Y6Q5
P78318	Q15554	O95831	P18433
Q8WUQ7	P14859	O95394	E7EWW0
P60866	Q9NRN7	G8JLH6	Q86UY6
Q7Z6L1	Q13433	Q8IWE2	P32322
M0R2B7	Q05397	Q9Y5B0	P11766
Q15181	Q92585	G3V314	P20591
A0A1B0GW68	F5GZ97	P82932	Q9UJ41
E5RI52	Q8WZA0	P51003	Q6NXG1
Q96K76	Q9H2C0	O00178	O95757
Q8WUH6	O15460	Q9Y244	J3KN16
Q96RK4	O75390	P42766	P32321
Q6NS38	Q8NDV7	Q9UJ68	Q7L2E3-2
Q53H96	J3KS05	Q16629	P16949
Q5JPE7	O95352	P47755	O75175
Q9Y448	P11182	O00115	Q13625
Q9H0V9	F8VRE8	Q86YN1	P62304
Q8IUF1	Q14457	Q96G97	P33992
P19022	A0A0C4DGG9	A0A024R571	G3V1L9
Q9H0S4	A0A1W2PP11	F5GZY7	A8MZB2
P00966	Q5TGY3	Q9NX76	Q15370
U5GXS2	Q15007	P04350	A0A1W2PQ51
Q8IVD9	P09936	P78318	P16278
Q9Y2E5	F8W9X7	Q8WUQ7	H0YHA7
Q9UKA4	M0QXF9	P60866	O14578-4
Q15785	E5RK75	M0R2B7	P04049
E5RIH5	Q8IYB3	Q15181	Q14289
P49207	Q12872	A0A1B0GW68	Q969F9
Q9UK76	Q9BZF3	E5RI52	H7BXH2
P30040	Q96GC6	Q96K76	P29317
Q08J23	Q8TAD4	Q8WUH6	Q9UMR2
H0Y5K5	Q99536	Q6NS38	Q9H093
Q8NFW8	O95456	Q53H96	Q9Y446
P18859	Q16698	Q5JPE7	Q53QV2
Q96PK6	P04233-2	Q9Y448	P62312
O43896	A0A0G2JIW1	Q9H0V9	I3L3Z2
Q96HN2-2	Q15046	Q8IUF1	K7EJE1
O43615	G5E9C2	P19022	P51452
P16989-2	Q60I27	Q9H0S4	P13645
P62253	Q5VY60	P00966	Q13541
Q5T1B5	P54819	Q8IVD9	Q13057
O43598	Q9Y4C2	Q9Y2E5	Q15036
C9JYQ9	P31150	Q9UKA4	Q15904
Q9UQ26	P55212	Q15785	P26006
Q14444	A0A0A0MSJ9	E5RIH5	cRAP112
P48507	Q9H857-2	P49207	Q9BSV6
A0A0U1RQY7	Q9NYT0	Q9UK76	O75477
Q99496	F5GY05	P30040	Q9BTV4
F8VXU5	O95831	Q08J23	Q96H35
P08727	O95394	H0Y5K5	Q8IUR7
Q8IWV8	G8JLH6	P62273	Q04724
Q9HBI1	Q8IWE2	P18859	J3QRV5
Q5T200	Q9Y5B0	Q96PK6	Q6NUQ1
Q9HCN8	P82932	O43896	A0A087WT44
Q9Y6E2	P51003	O43615	Q9BUP3-3
O60610	C9J7L9	P16989-2	Q709F0
Q9UKL0	O00178	Q9HBL7	P42566
O60269	P42766	P62253	Q96GK7
J3KNF4	Q16629	Q5T1B5	Q9UBL3
Q02338	Q6PCD5	C9JYQ9	Q5VWQ8
H7C1N3	P47755	Q9NVC3	Q9BV20
Q05932	O00115	Q14444	Q13618
Q8N684	Q96G97	P48507	O95816
P04899	A0A024R571	Q99496	Q969G3
Q02252	P04350	F8VXU5	Q8TDX7
P09972	P78318	P08727	M0QWZ7
A0A0A0MQX1	Q8WUQ7	Q8IWV8	P61006
P41743	P60866	Q9HBI1	Q14690
P50895	Q7Z6L1	H0YIC4	Q9Y6E0
O75530	M0R2B7	Q9HCN8	P18077
E9PM19	Q15181	Q9Y6E2	O60716-3
Q9BY77	A0A1B0GW68	O60610	Q9BZI7
Q8TC24	E5RI52	Q9UKL0	Q8TDB6
Q9P0L0	Q96K76	O60269	P55327
K7EKI8	Q8WUH6	J3KNF4	O43314
Q9BRT9	Q6NS38	Q02338	Q6T4R5
Q86XK3	Q53H96	H7C1N3	Q9BUR4
Q0VDF9	Q5JPE7	P24468	P50443
Q9NYQ6	Q9Y448	Q05932	A7KAX9
Q6PL24	Q9H0V9	Q8N684	P51665
E7EX17	Q8IUF1	P04899	P09493-10
Q9H270	P19022	Q02252	O15371
H0Y4R1	Q9H0S4	P09972	A0A1B0GTL5
Q8N0U4	P00966	A0A0A0MQX1	O75044
Q9NP72	Q8IVD9	P41743	E7EN19
Q5EBL8	Q9UKA4	P50895	O94903
Q9P0M6	Q15785	O75530	Q8N122
Q5VT52	E5RIH5	Q9BY77	Q13416
Q7Z434	P49207	O95835	Q93074
J3KQW3	Q9UK76	P62491	P04264
Q96GD4	P30040	Q9P0L0	Q96EY5
Q5TDF0	Q08J23	K7EKI8	P36578
V9GYM8	H0Y5K5	Q9BRT9	A0A0G2JJD3
O14757	P62273	Q86XK3	E7EN73
Q8NCC3	Q8NFW8	Q0VDF9	P17987
O94966-5	P18859	Q9NYQ6	Q7Z3B4
P07942	Q96PK6	Q6PL24	Q9Y6K9
Q9BRR8	O43896	E7EX17	Q9HB40
P42575	O43615	Q9H270	P0CG08
Q99487	P16989-2	H0Y4R1	Q9BVI4
G3V3E8	Q9HBL7	Q9NP72	O43427
O43175	P62253	Q5EBL8	P05386
A0A087WXS7	Q5T1B5	Q8IVV7	Q8WXD5
Q8IWB1	O43598	Q13303	P54886
P42126	C9JYQ9	Q5VT52	Q8TCS8
Q86UW9	Q9NVC3	Q7Z434	Q9UI12
Q8TE02	Q14444	Q96GD4	P35249
Q9NVI7-2	P48507	Q5TDF0	Q9UBQ5
Q9H944	F8VUW5	V9GYM8	F8W7U3
Q9Y4P3	Q99496	O14757	E7EPV7
Q8TCJ2	F8VXU5	Q8NCC3	Q86UU1
Q8IW35	P08727	O94966-5	C9J384
Q13098	Q8IWV8	P07942	Q9BY32
Q96GC5	Q9HBI1	Q9BRR8	Q5BKZ1
P55036	Q5T200	P42575	Q9UPQ0
Q9NUG6	Q9HCN8	Q99487	Q9Y2U8
Q9UJ83	Q9Y6E2	G3V3E8	Q99538
A0A0J9YXF2	O60610	O43175	Q8N9N2-2
P35354	Q9UKL0	A0A087WXS7	Q86UE4
Q9Y4L1	O60269	P42126	O15541
Q7Z7A1	J3KNF4	Q8TE02	P62269
A0A0B4J2A0	Q02338	Q9NVI7-2	Q9BYT8
O95861	H7C1N3	Q9H944	P49757
Q8IWX8	Q05932	Q9Y4P3	Q7LBR1
Q7L0Y3	Q8N684	Q8TCJ2	Q9UK59
E7ETK0	P04899	O00212	P16401
P35790	Q02252	Q8IW35	P43155
Q14739	P09972	Q13098	Q4LDG9
Q8NBM8	P41743	Q96GC5	V9GY86
Q86U44	P50895	P55036	B5MDF5
Q6P3X3	O75530	Q9NUG6	Q5JWF2
O43390	Q9BY77	Q9UJ83	Q2KHT3
P50995	P62491	A0A0J9YXF2	Q9Y4W6
O75356	Q9P0L0	P35354	P16435
Q7Z7F7	K7EKI8	Q9Y4L1	Q7L9L4
Q92692	Q9BRT9	O95861	Q9NZ32
Q9H4L5	Q86XK3	O60294	Q5EB52
Q12765	Q0VDF9	Q8IWX8	P49411
P28072	Q9NYQ6	Q7L0Y3	Q9Y487
O75822	E7EX17	J3KQ18	Q9Y5L0
Q86W56	Q8TAC2	E7ETK0	O95834
P57772	Q9H270	P35790	O00311
Q5SW79	H0Y4R1	Q14739	Q15796
A0A0G2JPP5	Q9NP72	Q86U44	Q9H788
A1A4S6	O43301	Q6P3X3	P00367
E9PBE1	Q5EBL8	O43390	A8MPP1
Q9Y2G5-1	Q9P0M6	A0A140TA32	G5E994
Q04760	Q5VT52	P50995	Q9ULC4
Q9NZD8	Q7Z434	O75356	Q5T0Y8
Q92673	Q96GD4	Q9Y5J6	Q9NTJ3
P61964	Q9NXG6	Q92692	Q8WXF1
P35221	Q5TDF0	Q9H4L5	P10768
P62314	V9GYM8	Q15012	Q8WU76
Q9NTX5	O14757	F8WC89	Q9NW82
Q96C92	Q8NCC3	Q12765	Q9BZJ0
Q8TBC4	O94966-5	P28072	P11413
Q13951	P07942	O75822	A0A0U1RQE4
P46937	Q9BRR8	Q86W56	E9PF16
A0A0A0MTS2	P42575	P57772	P37235
Q92979	Q99487	Q5SW79	Q6VEQ5
Q96RT1	G3V3E8	A0A0G2JPP5	O00505
V9GZ56	O43175	A1A4S6	P02538
P48147	A0A087WXS7	E9PBE1	P49755
Q9NPD3	Q8IWB1	Q04760	P62341
P46108	P42126	Q9NZD8	cRAP014
Q12834	Q86UW9	Q92673	Q96D46
A2ABF8	Q8TE02	Q7L775	E9PJX4
Q5R3B4	Q9NVI7-2	P61964	O60476
P50336	Q9H944	P35221	Q96AG4
Q5SW96	Q9Y4P3	P62314	P53582
Q9HDC5	Q8TCJ2	Q9NTX5	Q658Y4
Q86YR5	O00212	Q8TBC4	Q9Y4B6
Q8IXQ3	Q8IW35	Q13951	Q8WXG6-4
O75874	Q13098	P46937	Q9P031
F5H2X7	Q96GC5	A0A0A0MTS2	Q12904
Q01850	O76061	Q92979	A0A0A0MSB8
D6RJ90	P55036	Q96RT1	Q5SWX8
Q9P2I0	Q9NUG6	V9GZ56	Q12955
P52756	Q9UJ83	P48147	Q96QG7
A0A096LP25	A0A0J9YXF2	Q9NPD3	Q99471
Q8IYA6	Q9Y4L1	P46108	Q9Y266
P49915	D3YTC9	Q12834	Q9UBQ7
Q96JC9	O95861	Q9NUS5	Q14691
Q5GLZ8	Q8IWX8	Q96AE4-2	P42285
Q96JH7	Q7L0Y3	A2ABF8	Q99933
A0JNW5	E7ETK0	Q5R3B4	Q9BXV9
P62316	P35790	V9GYY5	Q5T0W9
Q5BJF6	Q14739	Q86YR5	P30307
O14772	Q86U44	Q8IXQ3	Q96M27
Q9BW62	Q6P3X3	O75874	P06280
F8W7C6	O43390	F5H2X7	D6REX3
Q9BQ15	H3BU04	Q96GM5	Q9Y6Q9
P62277	P50995	Q01850	P20339
Q9NT62	O75356	D6RJ90	P36543
A0A0A0MRI1	Q9Y4Y9	Q9P2I0	P57764
Q9UIC8	Q9Y5J6	P52756	P09525
Q86WA8	Q9H981	A0A096LP25	Q15369
Q86YS6	Q92692	Q8IYA6	J9JIE6
O60551	Q9H4L5	P49915	Q5JRA6
Q9BRV8	Q96HV5	Q5GLZ8	P05423
P20618	F8WC89	Q96JH7	Q04917
O95260	O14832	A0JNW5	C9J3D7
A0A087X0M4	Q12765	P62316	Q9NRF8
A0A0A0MRM8	A0A1W2PR17	Q5BJF6	P61009
Q99732	P28072	Q9BW62	P51398
O43583	O75822	F8W7C6	Q12972
Q13114	Q86W56	B7ZM68	Q86TX2
E9PR71	P57772	P62277	Q00587
Q9Y620	Q5SW79	A0A087WYW7	P49459
Q5SQP8	A0A0G2JPP5	H0Y7L6	A2RRP1
P45985	A1A4S6	Q9NT62	P14618-2
B4DJL6	E9PBE1	A0A0A0MRI1	E7EPM6
P43246	Q9Y2G5-1	Q9UIC8	Q13356
O43818	Q04760	Q86WA8	Q8N3E9
Q03518	Q9NZD8	Q86YS6	Q9P2W9
P67870	Q92673	O60551	Q8IUR0
Q9BSJ8	Q7L775	Q9BRV8	Q13033
P06493	P61964	P20618	Q9UNN5
Q9H9B1	P35221	A0A087X0M4	B5MCF9
Q9HD15	P62314	A0A0A0MRM8	O95989
Q86Y82	Q9NTX5	H3BNT2	O14828
Q9P2B4	Q96C92	H3BSM7	Q9UKU7
Q06330	Q8TBC4	O43583	Q9UHA4
Q7Z7H5	Q13951	C9JNA8	P52888
Q9H2P9	P46937	Q9Y620	P52732
Q96RF0	A0A0A0MTS2	Q5SQP8	P09493-8
P41567	Q92979	P45985	O15254
P35580	Q96RT1	B4DJL6	K7ENR6
Q9UNP9	V9GZ56	P43246	Q9H2U1
P19474	P48147	Q6IA86	P14735
P07948	Q9NPD3	O43818	O43318
P18085	P46108	Q14134	Q8N335
P34897	Q12834	Q03518	Q9NQ88
P78537	Q9NUS5	P67870	O14745
Q5VYS8	Q96AE4-2	Q9BSJ8	Q9NVZ3
Q5TCQ9	A2ABF8	P06493	Q5VZK9
F6WH68	V9GYY5	Q9H9B1	Q96CN9
O75376	Q5SW96	Q9HD15	Q9NUQ6
Q9H1A3	Q8IXQ3	Q86Y82	Q13563
Q9NZU5	O75874	Q9P2B4	P42765
Q9Y490	F5H2X7	Q9BVK8	P00441
P39060	Q96GM5	Q06330	P61326
Q86V21	D6RJ90	Q7Z7H5	P45954
Q9Y3U8	Q9P2I0	Q9H2P9	P49458
Q9NX08	P52756	Q96RF0	O94925-3
P04626	A0A096LP25	P41567	A0A087WV05
Q99460	Q8IYA6	P35580	O60563
H0YNG3	P49915	Q9UNP9	H0YJV7
Q7Z7M0	Q5GLZ8	P19474	Q9NVA1
P52292	Q96JH7	P07948	P00533
Q99640	A0JNW5	P18085	Q68E01-2
P42771	P62316	P34897	Q96GQ7
Q9Y2S6	Q5BJF6	P78537	Q9BRR6
P61106	F8W7C6	Q5VYS8	P62753
Q86VN1	P62277	H7BXY5	Q9UHD9
Q9NRF9	A0A087WYW7	F6WH68	A5YKK6
P21333	H0Y7L6	O75376	Q9NX40
P15289	Q9NT62	Q9H1A3	D3YTB5
P60520	A0A0A0MRI1	Q9NZU5	Q9H6H4
Q9Y6M9	E9PSG9	Q9Y490	O75533
P20337	Q5TA45	P39060	Q9BXB4
P62917	Q8IZ08	Q86V21	Q92917
P00403	Q9UIC8	Q5T7N3	P62308
Q9NVR5	Q86WA8	Q9Y3U8	Q96DV4
P50402	Q86YS6	Q9NX08	Q8NF37
P49419-2	O60551	P04626	Q9BWT7
Q9H081	Q9BRV8	Q99460	O43324
P52948	Q8NFX7	H0YNG3	P62699
Q86WQ0	P20618	Q96GM8	Q9Y657
P62241	O95260	P52292	Q9NPF5
Q96Q89-4	A0A087X0M4	Q99640	O14737
Q9BXT8-1	A0A0A0MRM8	P42771	Q6PI48
P51148	H3BNT2	Q9Y2S6	P15104
Q8TAT6	H3BSM7	P61106	Q86XL3
Q9Y5P6	O43583	Q86VN1	Q9HB09
Q9BRT6	C9JNA8	P21333	Q9P270
P51397	E9PR71	P15289	P30041
Q8IVJ1	Q9Y620	P60520	Q9UQR1
O60763	Q5SQP8	Q9Y6M9	Q8N668
Q9UII4	P45985	P20337	Q15149
Q9UHY1	P43246	P62917	H3BPC4
Q15121	Q9H3H5	Q9NR19	P11234-2
Q13425	Q6IA86	Q9Y426	Q9NW15
Q96E22	O43818	P00403	A0A087X253
O75937	Q14134	Q86XN7	Q99729-3
Q92934	Q03518	Q4ZIN3	Q9Y2V2
P23229-6	P67870	P50402	Q96JB2
Q9Y5S9	Q9BSJ8	P49419-2	Q12774
O00422	P06493	Q9H081	Q15814
Q15020	Q9H9B1	P52948	Q9H2J4
Q9UKX3	Q9HD15	Q86WQ0	Q9BXR0
Q86U70	Q86Y82	P62241	O43426
Q92922	Q9P2B4	Q05DH4	Q9BX40-2
O14545	Q7Z7H5	Q08AG7	Q63ZY3
Q7KZI7	Q96RF0	Q96Q89-4	Q5SXM2
Q8IZP0-9	P41567	P51148	L0R819
Q8TF72	P35580	Q8TAT6	Q96FK6
O15440	Q9UNP9	O95149	Q9BYX2
Q9BRK4	P07948	Q9Y5P6	Q9UKD2
Q9H9F9	P18085	O60361	Q9NP58
Q8IVT2	P34897	Q9BRT6	P68402
Q96CW1	P78537	P51397	Q9Y6W5
Q5QP56	Q5VYS8	O60763	Q01970
Q08257	F6WH68	Q9UII4	Q92688
O43488	O75376	Q9UHY1	Q16512
O15551	Q9H1A3	Q86U86	E7EPT4
Q9UHA2	Q9NZU5	Q15121	P05204
P14927	Q9Y490	Q13425	F5H442
Q8IZL8	P39060	O75937	Q9NVA4
Q13595	Q86V21	P23229-6	P10606
O95147	A6NED2	Q9Y5S9	P19447
P43034	Q9Y3U8	O00422	Q96EP5
Q14318	C9JY28	Q15020	P09496-2
Q9Y4F5	Q9NX08	Q92922	Q8IW92
Q9NYP7	P04626	O14545	Q9UKY7
Q9NS69	Q99460	Q7KZI7	Q9Y450
Q15386	Q53GT1	Q8IZP0-9	P23919
Q9C0E2	Q3MIR4	Q8TF72	O15037
Q9UMZ2	H0YNG3	Q6P4E1-4	Q9UBS9
Q9GZP4	Q96GM8	Q9BRK4	Q9HBL8
O75330	P52292	Q8IVT2	Q6PCB0
Q13443	Q99640	Q96CW1	Q96BP3
F5GWN5	P42771	Q5QP56	Q9H501
P25205	Q9Y2S6	Q08257	Q16637
Q9BYX4	P61106	O43488	Q15800
P34949	Q86VN1	P14927	O14773
Q9Y619	Q9NRF9	Q8IZL8	Q9Y2P8
Q9HAW4	P21333	A0A1B0GUS4	Q8IY37
Q92878	P60520	Q13595	P27635
Q16537	Q9Y6M9	P43034	Q8TDN6
Q15813	P20337	Q14318	Q7Z460
A0A1W2PRL5	P62917	Q9Y4F5	B1AKJ5
Q9H3H3	B1AKY9	Q8N5W9	Q9Y639
Q9Y6Q5	P00403	Q9NS69	Q8NC60
P18433	Q86XN7	Q15386	E9PEX6
Q7Z6K5-2	Q9NVR5	Q9C0E2	Q53ET0
E7EWW0	P50402	Q6ZMT9	O43237
Q86UY6	P49419-2	Q9UMZ2	P61163
P32322	Q9H081	Q9GZP4	O75351
P11766	P52948	O75330	Q9H8W4
P20591	P62241	Q13443	Q9Y6Q5-2
Q9UJ41	Q08AG7	F5GWN5	Q9UBC2-3
Q6NXG1	Q96AE7-2	P25205	Q9Y696
O95757	P51148	P34949	I3L161
J3KN16	Q8TAT6	Q9Y619	O60443
P32321	Q9Y5P6	Q9HAW4	O15357
Q7L2E3-2	O60361	Q92878	Q13751
P16949	Q9BRT6	Q16537	O60831
O75175	P51397	Q15813	A8CG34
Q13625	Q8IVJ1	A0A1W2PRL5	P51948
Q96ND0	O60763	Q9H3H3	P23141
Q9Y253	Q9UII4	Q9Y6Q5	P21266
P62304	Q9UHY1	P18433	P28066
P33992	Q15121	K7EMM8	Q8NHH9
G3V1L9	Q13425	Q7Z6K5-2	Q5HYJ3
A8MZB2	O75937	E7EWW0	Q6VY07
Q15370	Q92934	Q86UY6	O15305
A0A1W2PQ51	P23229-6	I3L419	O14657
P16278	Q9Y5S9	P32322	Q96P47
H0YHA7	O00422	P11766	O00459
O14578-4	Q15020	P20591	Q53GQ0
P04049	Q92922	Q9UJ41	Q96I24
Q14289	Q7KZI7	Q13371	Q9NWU2
A0A0U1RRL5	Q8IZP0-9	Q6NXG1	P51812
Q5TD07	Q8TF72	B5MC51	Q9NPI6
Q969F9	Q6P4E1-4	O95757	E9PHI4
H7BXH2	Q9BRK4	J3KN16	Q9BYD6
Q5T2D3	Q8IVT2	P32321	G5EA09
Q92547	Q96CW1	Q7L2E3-2	Q9NRA8
P29317	Q5QP56	P16949	Q8TCE6
Q9UMR2	Q08257	O75175	C9JQD4
Q9H093	O43488	Q13625	Q8NBK3
Q9Y446	O15551	Q9NS73	Q8N3F8
Q53QV2	P14927	P62304	Q8N6T3
P62312	Q9Y3E0	Q8N8N7	P22102
P59190	Q8IZL8	P33992	Q9HCE1
I3L3Z2	A0A1B0GUS4	G3V1L9	P54652
C9JAZ1	Q13595	A8MZB2	Q9BTT0
K7EJE1	P43034	Q15370	A0A087WWP4
P51452	Q14318	A0A1W2PQ51	Q6PJG6
P13645	Q9BXH1	P16278	Q2TAZ0
Q13541	Q9Y4F5	O75298	O75170
Q13057	Q9NYP7	H0YHA7	O60306
Q15036	Q9NS69	O14578-4	Q99570
Q15904	Q6ZMY6	P04049	Q96N67
P26006	Q15386	Q14289	P26358-2
cRAP112	Q9C0E2	Q969F9	Q9Y315
Q9BSV6	Q9UMZ2	Q92543	P29372
O75477	Q9GZP4	H7BXH2	D6RAQ1
Q9BTV4	O75330	P29317	Q13190
Q96H35	Q13443	Q9UMR2	B3KTM8
Q8IUR7	F5GWN5	Q9H093	P20700
Q04724	P25205	Q9Y446	O14579
J3QRV5	P34949	Q53QV2	E9PL57
Q6NUQ1	Q9Y619	P62312	P62136
D6RAR4	Q9HAW4	I3L3Z2	Q8IU60
A0A087WT44	Q92878	C9JAZ1	A0A0A0MSH9
Q9BUP3-3	Q16537	K7EJE1	Q15022
Q709F0	Q15813	P51452	O00148
P42566	A0A1W2PRL5	P13645	A0A087WZG4
Q96GK7	Q9H3H3	Q13541	Q9GZS3
Q9UBL3	Q9Y6Q5	Q13057	P48730-2
Q5VWQ8	P18433	Q15036	P51571
P24821-4	E7EWW0	Q15904	Q9UHB9
Q9BV20	Q86UY6	P26006	P62841
Q13618	I3L419	J3KNN3	Q2TBE0
O95816	P32322	cRAP112	D3YTB1
Q969G3	P11766	Q9BSV6	P54709
Q8TDX7	P20591	O75477	Q96FQ6
M0QWZ7	Q9UJ41	Q9BTV4	Q9UBK7-2
P61006	Q13371	Q96H35	O15294
Q14690	Q6NXG1	Q8IUR7	Q8IZ81
G3V3U8	B5MC51	Q04724	Q9H9Y2
Q9Y6E0	S4R386	J3QRV5	P17655
A0A0A0MSQ6	O95757	Q6NUQ1	Q9BVJ6
P18077	Q92738-2	D6RAR4	F8W031
O60716-3	J3KN16	A0A087WT44	Q01650
Q9BZI7	P32321	Q9BUP3-3	Q9Y678
Q8TDB6	Q7L2E3-2	Q709F0	O14950
P55327	P16949	P42566	O75190
O43314	O75175	Q96GK7	P61769
Q6T4R5	Q13625	Q9UBL3	Q96NB3
Q9BUR4	F6SS63	Q5VWQ8	Q8IXI1
P50443	P62304	O60906	A0A087WUC6
A7KAX9	Q8N8N7	Q9BV20	Q12962
P51665	P33992	Q13618	Q15059
P09493-10	G3V1L9	O95816	Q9UP83
O15371	A8MZB2	Q969G3	A0A0C4DFM7
A0A1B0GTL5	Q15370	Q8TDX7	Q9Y4G2
O75044	A0A1W2PQ51	M0QWZ7	P62829
P53816	P16278	P61006	P47985
E7EN19	O75298	Q14690	O15431
O94903	H0YHA7	Q9Y6J9	Q96P48-1
Q8N122	O14578-4	Q9Y6E0	J3KMZ8
Q8N4P3	P04049	P18077	H7BYZ9
Q13416	Q14289	O60716-3	H3BPE1
Q93074	Q5TD07	Q9BZI7	Q9NZJ0
P04264	Q969F9	Q8TDB6	Q96AE7
Q96EY5	B5MD00	P55327	Q9BVQ7
P36578	H7BXH2	Q86SE9	J3QLJ5
A0A0G2JJD3	Q5T2D3	O43314	Q15024
E7EN73	P29317	Q6T4R5	Q9Y3I0
P17987	Q96SI1	Q2PPJ7	P07711
Q7Z3B4	Q9ULD0	Q9BUR4	Q5VWV2
Q9Y6K9	Q9UMR2	P50443	Q9P2J5
O00257	Q9H093	A7KAX9	Q9NZL4
Q9HB40	Q9Y446	P51665	O00232
P0CG08	Q53QV2	P09493-10	G5E9E7
Q9BVI4	P62312	O15371	P61024
O43427	E7EX48	Q9NRL2	Q92876
P05386	I3L3Z2	A0A1B0GTL5	P49321
P78325	E9PR17	O75044	Q14533
Q8WXD5	K7EJE1	P53816	P04844
P54886	P51452	H0YGS7	P45983-2
Q8TCS8	P13645	E7EN19	Q16595
Q9UI12	Q13541	O94903	Q6P1J9
P35249	Q13057	Q8N122	C9JRJ5
Q9UBQ5	Q15036	Q13416	P62330
F8W7U3	Q9BYT3	Q93074	Q86VR2
A0A0J9YY17	Q15904	P04264	P23258
E7EPV7	P26006	Q96EY5	Q9Y295
Q14088	Q96L50	P36578	Q14677
Q86UU1	cRAP112	A0A0G2JJD3	O43572
C9J384	Q9BSV6	E7EN73	Q8NB90
Q9BY32	O75477	P17987	O43252
Q5BKZ1	Q9BTV4	Q7Z3B4	P07237
C9J2P0	Q96H35	Q9Y6K9	Q68DQ2
Q9UPQ0	Q8IUR7	P03886	E9PMR4
Q9Y2U8	Q04724	Q9HB40	Q03468
Q99538	J3QRV5	P0CG08	J3KR51
Q8N9N2-2	Q6NUQ1	Q9BVI4	P23743
Q86UE4	A0A087WT44	O43427	Q9UPU9
P08047	Q9BUP3-3	P05386	P14550
O15541	Q709F0	J3KRW7	Q8N1G2
Q96G01	P42566	Q8WXD5	P14373
[truncated: 4,122 more rows]

## Sheet: VX-809
Treated_Rep1	Treated_Rep2	Treated_Rep3	Common Treated
O95881	O95881	O95881	O95881
O00330	O00330	O00330	O00330
Q96GX9	Q96GX9	Q96GX9	Q96GX9
Q53EP0	O76071	Q53EP0	Q53EP0
Q5XG87	Q53EP0	E9PQ51	Q13423
E9PQ51	Q5XG87	Q13423	O15066
Q13423	Q13423	O15066	Q9BRX9
O15066	O15066	Q9BRX9	P62875
Q9BRX9	Q9BRX9	O75385	Q9UIJ7
O75385	P62875	P62875	O60942
P62875	Q9UIJ7	Q9UIJ7	Q00577
P29728	O60942	O60942	Q9UGI8
Q9UIJ7	Q00577	Q00577	Q13185
O60942	Q9C0J8	Q9C0J8	A6PW57
Q6F5E8	Q9UGI8	Q9UGI8	Q15750
Q00577	Q13185	Q13185	P45974
Q9UGI8	F5H5N1	F5H5N1	O43617
Q13185	A6PW57	A6PW57	K7ERP4
A6PW57	H0YAJ5	H0YAJ5	Q9BSJ2
Q15750	Q15750	Q15750	P0DPB6
P45974	E9PJ30	E9PJ30	Q71RC2
O43617	P45974	P45974	Q86SQ0
K7ERP4	O43617	O43617	P31751
Q9BSJ2	K7ERP4	K7ERP4	Q9UH17
K7ESH9	Q9BSJ2	Q9BSJ2	Q9ULK4
P0DPB6	K7ESH9	P0DPB6	Q92538
Q71RC2	P0DPB6	Q8NHQ8	P04632
Q86SQ0	A0A286YFF5	Q71RC2	Q6SJ93
P31751	Q71RC2	Q86SQ0	Q96FV9
Q9UH17	Q86SQ0	P31751	P63104
Q9ULK4	S4R302	Q9UH17	A0A087X2I1
Q92538	P31751	Q9ULK4	P58546
Q9NS40	Q9UH17	Q92538	Q9HA77
P04632	Q9NYJ1	P04632	Q53T59
Q6SJ93	Q9ULK4	Q6SJ93	H0YGR4
O14686	Q92538	Q96FV9	P83436
Q96FV9	P04632	P63104	Q05639
P63104	Q96SL8	A0A087X2I1	Q12979
C9J235	Q6SJ93	P58546	A0A1W2PNX8
A0A087X2I1	Q96FV9	Q9HA77	Q9H5N1
Q16363	P63104	Q53T59	Q8N5A5
P58546	C9J235	H0YGR4	A0A0D9SGE8
Q86XK2	A0A087X2I1	P83436	A8MXP9
Q9HA77	P58546	Q05639	Q9Y6D5
Q53T59	Q86XK2	Q12979	Q15434
H0YGR4	Q9HA77	A0A1W2PNX8	Q9P0T7
P83436	Q53T59	Q9H5N1	P26641
Q05639	H0YGR4	Q8N5A5	Q9UJX6
Q12979	P83436	P0DPF3	Q4G0F5
A0A1W2PNX8	Q05639	A0A0D9SGE8	Q16777
Q9H5N1	Q12979	A8MXP9	Q9BQ67
Q8N5A5	A0A1W2PNX8	A0A0U1RRJ3	P11586
A0A0D9SGE8	Q9H5N1	Q9Y6D5	B8ZZC8
A8MXP9	Q8N5A5	Q15434	Q08AM6
Q9Y6D5	A0A0D9SGE8	Q9P0T7	O14879
Q15434	A8MXP9	D6R9G8	B0QYK0
A0A087X119	A0A0U1RRJ3	P26641	C9JRD2
Q9P0T7	Q9Y6D5	Q9UJX6	B4DKV7
O75386	Q15434	Q4G0F5	Q9UNN8
P26641	Q9P0T7	Q16777	F5GZS6
Q9UJX6	O75386	O95772	Q8WUA8
Q4G0F5	P26641	Q9BQ67	P30154
Q16777	Q9UJX6	F8WEF5	Q92805
Q9BQ67	Q4G0F5	P11586	Q9BYG5
P11586	Q16777	B8ZZC8	A0A0A0MTL6
B8ZZC8	Q16891-4	Q08AM6	H0Y4E8
Q08AM6	O95772	O14879	Q5T280
O14879	Q9BQ67	B0QYK0	O75381
B0QYK0	F8WEF5	C9JRD2	O15264
C9JRD2	P11586	Q86XN8	A0A0A0MSA0
B4DKV7	B8ZZC8	B4DKV7	P46977
Q9UNN8	Q08AM6	Q9UNN8	P10644
F5GZS6	O14879	F5GZS6	O15498
Q9BW66	B0QYK0	Q9UPS8	H3BMD8
Q8WUA8	C9JRD2	Q9BW66	Q8WVK2
P30154	B4DKV7	Q9H910-2	Q9UBS4
Q92805	Q9UNN8	A0A1B0GU40	B5MBX0
Q9BYG5	F5GZS6	Q8WUA8	P61026
A0A0A0MTL6	Q9H910-2	Q9H3S5	Q8TED0
Q8TEL6	Q8WUA8	Q13487	Q7L5N7
P27540	Q9H3S5	Q7L7L0	Q07889
H0Y4E8	P30154	P30154	O43815
Q5T280	Q92805	Q92805	A8MQ02
Q96BX8	Q9BYG5	E2QRF0	O76080
P53597	F5H757	Q9BYG5	G3V3R7
O75381	Q9Y663	Q9Y663	E9PNP3
O15264	A0A0A0MTL6	A0A0A0MTL6	Q9BVS4
A0A0A0MSA0	F5H4N4	F5H4N4	F5GYQ1
P46977	H0Y4E8	P27540	Q15047
P10644	Q5T280	H0Y4E8	Q9UHL4
Q9Y4G6	P53597	Q5T280	Q9Y496
O15498	O75381	O75381	A0A075B7G8
H3BMD8	O15264	D6RAN8	J3KN67
Q8WVK2	A0A0A0MSA0	O15264	A0A0D9SF70
Q9UBS4	P46977	A0A0A0MSA0	Q9H1E3
B5MBX0	P10644	P46977	E9PEE8
P61026	Q9Y4G6	P10644	A0A0G2JNY3
Q8TED0	O15498	O15498	Q9NR28
Q7L5N7	H3BMD8	H3BMD8	Q6XZF7
Q07889	Q8WVK2	Q8WVK2	Q12996
O43815	Q9BRT3	Q9BRT3	Q9BVC4
A8MQ02	Q53SF7	Q9H173	Q9NYB9
O76080	Q9H173	Q9UBS4	F5H365
G3V3R7	Q08623	Q460N5-1	Q99590
E9PNP3	Q9UBS4	B5MBX0	Q9H9Q4
D2CGD1	Q6PIJ6	P61026	Q9BUH6
Q9BVS4	Q460N5-1	Q8TED0	O15530
F5GYQ1	B5MBX0	Q7L5N7	Q9NZC9
Q15047	P61026	G3V5T0	Q8ND24
Q9UHL4	Q8TED0	J3QL56	P48739
Q9Y496	Q96AP0	Q07889	Q00341
A0A075B7G8	Q7L5N7	O43815	P40306
J3KN67	G3V5T0	A8MQ02	Q96D71
A0A0D9SF70	J3QL56	O76080	A6NNK5
Q9H1E3	Q07889	G3V3R7	Q9ULM6
B7ZLI8	O43815	E9PNP3	A0A1W2PRA1
E9PEE8	A8MQ02	Q9BVS4	A0A087WYV9
A0A0G2JNY3	O76080	F5GYQ1	P09497-2
E9PS76	G3V3R7	Q15047	Q16836
Q9NR28	E9PNP3	Q9UHL4	Q5T0F9
Q6XZF7	D2CGD1	Q9Y496	Q9NYZ3
Q12996	Q9BVS4	A0A075B7G8	Q9BZD3
A8MYS5	F5GYQ1	J3KN67	E9PD50
F8VV04	Q15047	A0A0D9SF70	P69905
Q9BVC4	Q9UHL4	P15407	Q9NVI1
G3XAN8	Q9Y496	Q9H1E3	Q9NXD2
F5GXK4	A0A075B7G8	Q86U28	Q92733
Q9NYB9	J3KN67	E9PEE8	E9PMH5
F5H365	A0A0D9SF70	A0A0G2JNY3	P13473
Q99590	Q9H1E3	E9PS76	P39023
Q9H9Q4	Q86U28	Q9NR28	Q8TAE6
Q9BUH6	B7ZLI8	Q6XZF7	Q86VY4
O15530	E9PEE8	Q12996	A0A024QZ33
Q6P1L5	A0A0G2JNY3	Q9UHQ1	P52943
Q9NZC9	Q9NR28	Q9BVC4	O00429-4
O43824	Q6XZF7	G3XAN8	X6RLX0
Q8ND24	Q12996	Q9NYB9	Q15642
P48739	A8MYS5	F5H365	Q9HB66
Q00341	Q9UHQ1	Q99590	Q96S66
P40306	Q9BVC4	Q9H9Q4	P51532
Q96D71	Q9NYB9	Q9BUH6	Q92621
A6NNK5	F5H365	O15530	Q2TAA2
Q9ULM6	Q9Y6I4	O95749	F5H8G1
G3V1B2	Q99590	Q9NZC9	P53365
A0A1W2PRA1	Q9H9Q4	Q8ND24	P28838
A0A087WYV9	Q9BUH6	Q9H2G2-2	E7ESC6
P09497-2	O15530	P48739	P38606
Q16836	O95749	Q00341	Q7Z7L7
Q5T0F9	Q6P1L5	P40306	Q71UI9
Q96F24	Q5U5Z8	Q96D71	Q12929
Q9NYZ3	Q9NZC9	A6NNK5	Q8IV38
Q9BZD3	O43824	Q9ULM6	Q14914
Q7Z2W9	Q8ND24	A0A1W2PRA1	Q16718
E9PD50	P48739	A0A087WYV9	P35658
P69905	Q00341	P09497-2	P18583
Q9NVI1	P40306	Q16342	P35251
H0YB15	Q96D71	Q16836	Q9HAU0
Q96EQ0	A6NNK5	Q5T0F9	M0R205
Q9NXD2	Q9ULM6	Q9NYZ3	P18754
Q92733	B7Z7N5	Q9BZD3	P49441
E9PMH5	A0A1W2PRA1	Q7Z2W9	Q96KB5
P13473	A0A087WYV9	E9PD50	O43166
P39023	P09497-2	P69905	P24539
Q8TAE6	Q16342	Q9NVI1	P43304
Q86VY4	Q16836	Q9NXD2	Q8WW12
A0A024QZ33	Q5T0F9	Q92733	Q15631
P52943	Q9NYZ3	E9PMH5	Q15058
O00429-4	Q9BZD3	P13473	Q86YV5
X6RLX0	E9PD50	P39023	A0A087X0R6
Q15642	Q5HYK3	Q96NW7	O94964-2
Q9HB66	P69905	Q8TAE6	O00462
Q6ZMG9	Q9NVI1	Q86VY4	P27695
F8VWW7	Q9NXD2	A0A024QZ33	Q7L5Y9
Q96S66	Q92733	P52943	A0A1W2PNP0
P51532	E9PMH5	O00429-4	J3QRU8
K7EQZ3	P13473	X6RLX0	Q9BRP4
Q92621	P39023	Q15642	A0A0C4DFL7
Q2TAA2	Q8TAE6	Q9HB66	J3KR97
F5H8G1	Q86VY4	Q96S66	C9JLV4
P53365	A0A024QZ33	P51532	Q5TCU3
P28838	P52943	K7EQZ3	Q9NXS2
E7ESC6	O00429-4	Q92621	G3V4K3
P38606	X6RLX0	Q2TAA2	F5GYX3
Q9NY12	Q15642	F5H8G1	Q7Z2E3
Q7Z7L7	Q9HB66	P53365	Q8NBU5
Q71UI9	Q96S66	P28838	P08133
Q12929	E5RI94	E7ESC6	Q9UJC3
Q8IV38	P51532	P38606	P26373
Q14914	Q92621	Q7Z7L7	P23786
Q9H7C4	Q2TAA2	Q9UI42	Q12792
Q96IW7	F5H8G1	Q71UI9	Q8N573
Q16718	P53365	Q12929	P78417
P35658	P28838	Q8IV38	O94868
P18583	E7ESC6	Q14914	Q9Y5A7
P35251	P38606	Q9H7C4	Q6PGP7
Q9HAU0	Q9NY12	Q16718	P48556
M0R205	Q7Z7L7	P35658	Q9HCK8
P18754	A0A087WUS1	A0A0G2JNC7	Q8IWJ2
P49441	Q71UI9	P18583	O75449
Q96KB5	Q12929	P35251	P54578
O43166	Q8IV38	Q9HAU0	P07305
B0QXZ9	Q14914	M0R205	Q5T4U5
P24539	Q16718	P18754	P23368
P43304	P35658	P49441	O14787-2
Q8WW12	A0A0G2JNC7	Q96KB5	P08729
Q15631	P18583	O43166	Q9BWJ5
Q15058	P35251	P24539	D6RIU2
B9EGQ5	Q9HAU0	P43304	A0A182DWF2
Q86YV5	M0R205	O95926	Q13888
A0A087X0R6	P18754	Q8WW12	F6U1T9
O94964-2	P49441	Q15631	P16190
O00462	Q96KB5	Q15058	Q01432
Q14703	O43166	Q9NVX0	P84243
P27695	B0QXZ9	P23497	Q99961
Q7L5Y9	P24539	Q86YV5	Q86UL3
A0A1W2PNP0	P43304	A0A087X0R6	P21912
J3QRU8	O95926	O94964-2	H0Y9X1
Q9BRP4	Q8WW12	O00462	Q96QD8
A0A0C4DFL7	Q15631	Q12769	Q06481
J3KR97	Q15058	P27695	A0A1P0AYU5
C9JLV4	Q9NVX0	Q7L5Y9	Q92620
Q5TCU3	B9EGQ5	A0A1W2PNP0	P46926
Q9NXS2	P23497	J3QRU8	A0A1B0GVH5
G3V4K3	Q86YV5	Q9BRP4	Q8NHU6
F5GYX3	A0A087X0R6	A0A0C4DFL7	Q96EB6
Q8NC44	O94964-2	J3KR97	Q99569
Q7Z2E3	O00462	C9JLV4	Q9NP77
Q8NBU5	Q14703	Q5TCU3	O14976
Q9H0I3	Q12769	Q9NXS2	J3KSP0
P08133	P27695	G3V4K3	J3KQN4
Q9UJC3	Q7L5Y9	F5GYX3	O60911
P26373	A0A1W2PNP0	Q7Z2E3	Q9UKV8
F5H5N2	J3QRU8	Q8NBU5	O95251
O43422	Q9BRP4	P08133	Q5T5C7
O00308	A0A0C4DFL7	Q9UJC3	A0A087X2D5
P23786	A0A087WUR6	P26373	Q86VP6
Q12792	J3KR97	O43422	J3KNR0
Q8N573	C9JLV4	P23786	Q9P003
J3KPD3	Q5TCU3	Q9BQ90	Q92890-1
P78417	Q9NXS2	Q12792	Q13561
O94868	G3V4K3	P48426	P48553
Q9Y5A7	F5GYX3	Q8N573	P24844
Q6PGP7	Q8NC44	J3KPD3	Q8IWZ3-6
Q96NK8	O00628	F8VSL3	P62820
P48556	Q7Z2E3	P78417	O15327
Q9HCK8	Q8NBU5	A0A024RCQ8	P48059
Q8IWJ2	P08133	O94868	Q5VIR6-4
O75449	Q9UJC3	Q9Y5A7	P11388
P54578	P26373	Q9P2K2	Q99717
P07305	F5H5N2	Q6PGP7	A0A087X0W9
Q5T4U5	O00308	P48556	P13010
P23368	P23786	Q9HCK8	P21283
O14787-2	Q9BQ90	Q8IWJ2	P05026
P08729	Q12792	O75449	A0A0C4DGG1
Q9BWJ5	Q8N2G8	P54578	Q96KG9
H0YHT0	Q8N573	P07305	Q8WYA6
D6RIU2	P78417	Q5T4U5	Q9NZM1
A0A182DWF2	A0A024RCQ8	P23368	Q5TBB1
Q13888	O94868	O14787-2	O00506
Q969J2	Q9Y5A7	P08729	X6RM59
F6U1T9	Q6PGP7	Q9BWJ5	Q96IK1
P16190	P48556	D6RIU2	F8VUA2
Q01432	Q9HCK8	A0A182DWF2	Q8WVV9
P84243	Q8IWJ2	Q13888	Q9H444
Q5TA50	O75449	Q14807	P05121
Q99961	P54578	F6U1T9	P08621
Q86UL3	P07305	P16190	O00116
P21912	Q5T4U5	A0A1W2PPE6	A0A1B0GUI1
H0Y9X1	P23368	Q01432	A0A1B0GWA1
Q96QD8	O14787-2	P84243	Q7Z2K8
Q06481	P08729	Q5TA50	P15531
A0A1P0AYU5	Q9BWJ5	Q99961	Q12899
Q92620	D6RIU2	Q86UL3	P17405
P46926	A0A182DWF2	P21912	P26196
A0A1B0GVH5	Q13888	H0Y9X1	Q9NQT5
Q8NHU6	Q14807	Q96QD8	Q14677-3
Q6IPM2	F6U1T9	Q06481	Q9BXL7
Q96EB6	P16190	A0A1P0AYU5	Q9NRL3
Q99569	A0A1W2PPE6	P53701	O75695
Q9NP77	Q01432	Q92620	A0A0J9YWL0
O14976	P84243	P46926	Q9NR33
J3KSP0	A6XND1	A0A1B0GVH5	Q5VTR2
S4R410	Q99961	Q9NWX5	K4DIA8
J3KQN4	Q86UL3	Q8NHU6	Q9NV35
O60911	P21912	Q6IPM2	Q5JTZ9
Q9UKV8	H0Y9X1	Q96EB6	O00629
O95251	A0A1W2PQS0	Q99569	O60333-3
Q5T5C7	Q96QD8	I3L3S0	Q12986
A0A087X2D5	Q06481	Q9NP77	Q9HCE5
Q86VP6	A0A1P0AYU5	O14976	O00159
J3KNR0	P53701	J3KSP0	Q9Y6R9
Q9P003	Q92620	S4R410	P05388
Q08050	P46926	J3KQN4	Q13445
Q9BQ04	A0A1B0GVH5	O60911	A0A0A0MRJ3
Q92890-1	Q9NWX5	Q9UKV8	P49848
Q13561	P20933	O95251	A0A0A0MT01
M0QXD0	Q8NHU6	Q5T5C7	Q9BXJ9
A0A0G2JH37	O43688	A0A087X2D5	O00267-2
Q96IG2	O60930	Q86VP6	P06865
P48553	Q96EB6	J3KNR0	Q9BZE9
P24844	Q99569	Q9P003	O15226
Q8IWZ3-6	I3L3S0	E9PHY0	Q9P0N9
Q9H4G0-3	M0QXN9	Q92890-1	P20248
P62820	Q9NP77	Q13561	Q8WUI4
H0YKL0	O14976	A0A0G2JH37	P34059
O15327	B1AHJ5	E9PCV4	P46527
P48059	J3KSP0	P32856	B8ZWD1
Q6ZW49	J3KQN4	P48553	Q14651
G5E975	O60911	C9J9P8	F8W7U0
Q5VIR6-4	Q9UKV8	P24844	Q9Y333
P11388	Q969Y2	Q8IWZ3-6	O75347
Q99717	O95251	Q9UHW5	H7C173
A0A087X0W9	Q5T5C7	P62820	P14625
P13010	A0A087X2D5	O15327	J3QRU1
P21283	Q86VP6	P48059	K7ELY2
P05026	J3KNR0	G5E975	Q12959
A0A0C4DGG1	Q9P003	Q8NDD1	O00217
Q96KG9	E9PHY0	Q86SX6	Q96AE4
Q8WYA6	Q92890-1	Q5VIR6-4	Q14683
Q9NZM1	Q13561	P11388	F8WCT1
Q5TBB1	P48553	Q99717	Q9NQC8
O00506	P52737	A0A087X0W9	Q7Z7N9
W5RWE6	P24844	P13010	X6RLT1
X6RM59	A0A087WZ85	A0A087X097	Q96B96
Q96IK1	Q8IWZ3-6	P21283	Q9BVP2
F8VUA2	Q9H4G0-3	P05026	H3BUD2
Q8WVV9	Q9UHW5	A0A0C4DGG1	Q96AJ9-1
Q9H444	P62820	Q96KG9	M9T4I7
H3BPM9	O15327	Q8WYA6	Q86YP4
B3KNX7	P48059	Q9NZM1	Q9Y606
P05121	H0YB70	Q5TBB1	A0A0A0MR51
O15550	Q9Y5P8	O00506	P40763
P08621	Q86SX6	X6RM59	Q9Y394
Q658P3	Q5VIR6-4	Q96IK1	E9PN10
O00116	P11388	F8VUA2	Q15424
A0A1B0GUI1	Q99717	Q8WVV9	Q14331
Q969P0	A0A087X0W9	Q9H444	Q8WZ82
A0A1B0GWA1	P13010	H3BPM9	P13984
Q7Z2K8	P21283	P05121	P11216
P15531	P05026	P08621	Q96T76
Q8N0Y7	A0A0C4DGG1	O00116	Q9NSK0
Q12899	Q96KG9	A0A1B0GUI1	P47895
P17405	Q8WYA6	Q969P0	Q02952
P26196	Q9NZM1	A0A1B0GWA1	P30050
Q9NQT5	Q5TBB1	Q7Z2K8	cRAPR1
Q14677-3	O00506	P15531	Q9UBU9
Q5F1R6	W5RWE6	Q12899	Q14192
F8W8Y7	X6RM59	P17405	Q92845
Q9BXL7	A0A087WZZ6	P26196	Q08209-2
Q9NRL3	Q96IK1	Q9NQT5	Q9P035
O75695	F8VUA2	Q14677-3	Q9NVQ4
A0A0J9YWL0	Q8WVV9	Q5F1R6	P20290-2
Q9NR33	Q9H444	Q7L8J4	Q13126
Q5VTR2	P05121	Q7L590	Q9H4Z3
K4DIA8	P08621	M0QZM1	Q01085
Q9NV35	Q658P3	Q9BXL7	Q99567
J3KT75	O00116	Q9NRL3	Q9UNS1
Q5JTZ9	A0A1B0GUI1	O75695	P16144-2
P09038-1	A0A1B0GWA1	A0A0J9YWL0	Q14554
Q8N271	Q7Z2K8	F8W8D3	Q96HP0
Q6ZTW0	P15531	Q9NR33	P58107
O00629	Q8TEA7	Q5VTR2	H0Y547
O60333-3	O43854	K4DIA8	Q96C36
Q12986	Q12899	H0YAX6	Q8TCX1
A2A341	P17405	Q9NV35	Q8IZT6
Q9HCE5	P26196	J3KT75	Q8IZH2
O00159	Q9NQT5	P15923	Q9BY44
Q9Y6R9	Q14677-3	Q5JTZ9	Q9BQA1
P05388	Q7L8J4	Q8N271	Q86X55
Q13445	B5MDG7	O00629	P28074
A0A0A0MRJ3	M0QZM1	O60333-3	Q9ULH1
P49848	Q9BXL7	Q12986	Q9NZI8
A0A0A0MT01	Q9NRL3	A2A341	Q96Q11
Q9BXJ9	O75695	Q9HCE5	P98194
E9PLP5	A0A0J9YWL0	O00159	Q8TAQ2
O00267-2	F8W8D3	Q9Y6R9	O14641
Q9H0T7	Q9NR33	Q8NF64	Q2M2I8
P06865	Q5VTR2	P05388	Q13268
Q9BZE9	K4DIA8	O95164	J3QLG5
Q5T7V8	Q9NV35	Q13445	Q92503
O15226	Q5JTZ9	A0A0A0MRJ3	Q16576
Q9P0N9	O00629	P49848	E9PBC1
P20248	Q9GZM7	A0A0A0MT01	Q9Y6M1
Q8WUI4	O60333-3	Q9BXJ9	Q9P0J1
P34059	Q12986	O00267-2	A0A1W2PP10
P46527	Q9HCE5	Q9BT92	Q96BZ9
B8ZWD1	O00159	P06865	O15231
Q14651	Q9Y6R9	Q9BZE9	Q31612
F8W7U0	Q9NZJ4	Q5T7V8	P43121
Q9Y333	Q8NF64	O15226	Q02833
O60239	P05388	Q9P0N9	B3KVZ3
O75347	Q13445	P20248	Q5JPH6
H7C173	A0A0A0MRJ3	Q8WUI4	E7ESY4
P14625	P49848	P34059	G3V4T7
Q86WC4	A0A0A0MT01	P46527	Q9UID3
J3QRU1	Q9BXJ9	B8ZWD1	Q9BT22
K7ELY2	O00267-2	Q14651	Q92614
F5GWA4	Q9BT92	F8W7U0	Q13131
Q12959	Q9H0T7	Q9Y333	Q9NQE9
O00217	P06865	O75347	Q13257
E9PDJ2	Q9BZE9	H7C173	P49257
Q96AE4	O15226	P14625	O43760
Q14683	Q9P0N9	J3QRU1	H3BNT4
Q96QE3	P20248	K7ELY2	Q99832
F8WCT1	Q8WUI4	Q12959	Q9UJX4
Q9NQC8	P34059	O00217	P51991
Q7Z7N9	P46527	Q96AE4	B7ZKQ9
X6RLT1	B8ZWD1	P0CG13	Q16533
Q96B96	Q14651	Q14683	Q9P0V9
Q9BVP2	F8W7U0	F8WCT1	Q9Y6D9
H3BUD2	Q9Y333	Q9NQC8	P28331
Q96AJ9-1	O75347	Q7Z7N9	P09914
M9T4I7	H7C173	X6RLT1	M0R0P8
Q86YP4	P14625	Q96B96	Q9BXK5
Q9BRX8	Q86WC4	H0YAR2	P61201
Q9Y606	J3QRU1	Q9BVP2	Q9Y230
A0A0A0MR51	K7ELY2	H3BUD2	P38935
P40763	F5GWA4	Q96AJ9-1	O14974
Q9Y394	Q12959	M9T4I7	Q9H223
E9PN10	O00217	Q86YP4	Q96GA3
Q15424	Q96AE4	Q9Y606	Q96DZ1
P22415	F8VSI7	A0A0A0MR51	Q9UKV5
Q14331	P78357	P40763	Q9UKG1
Q8WZ82	Q14683	P17152	Q96JN8
P13984	F8WCT1	Q9Y394	E9PP21
P11216	Q9NQC8	E9PN10	Q9NWV4
Q96T76	Q7Z7N9	Q15424	P07951-3
Q9NSK0	X6RLT1	Q14331	A6NKD9
P47895	Q96B96	Q8WZ82	O75689
Q02952	Q9BVP2	P13984	Q13347
P30050	H3BUD2	P11216	J3KNN5
Q7Z2W4	Q96AJ9-1	Q96T76	Q9BX10
cRAPR1	M9T4I7	Q9NSK0	Q7KZ85
Q9UBU9	Q86YP4	P47895	Q14517
Q14192	Q9H4K7	Q02952	Q15149-4
Q92845	Q9BRX8	P30050	A0A0A0MS70
Q08209-2	Q9Y606	cRAPR1	Q15262
Q9P035	A0A0A0MR51	Q9UBU9	Q6ZMI0
Q9NVQ4	P40763	Q14192	Q9HAB8
P20290-2	Q9Y394	Q92845	Q9Y5B8
Q13126	E9PN10	Q08209-2	Q9H7D0
Q9H4Z3	Q15424	Q9P035	Q96P16
Q01085	Q14331	Q9NVQ4	Q16775
Q99567	Q8WZ82	P20290-2	P35270
Q9UNS1	P13984	Q13126	E7EM64
P16144-2	P11216	O75964	Q8NE71
Q14554	Q96T76	Q9H4Z3	Q9NVG8
Q96HP0	Q9NSK0	Q01085	A0A0A0MT60
P58107	P47895	Q99567	P19387
H0Y547	Q02952	Q9UNS1	O75976
Q96C36	P30050	P16144-2	O15182
Q8TCX1	Q7Z2W4	Q14554	P63165
Q8IZT6	cRAPR1	Q96HP0	Q53GS9
Q9BZ95	Q9UBU9	P58107	P28347
Q8IZH2	Q14192	H0Y547	Q99543
Q9BY44	Q92845	Q96C36	P42892
Q9BQA1	Q08209-2	Q8TCX1	P52298
Q86X55	Q9P035	Q8IZT6	Q96AX1
P28074	Q9NVQ4	Q8IZH2	Q2M389
Q9ULH1	P20290-2	Q9BY44	Q96MW5
A0A0G2JHL3	Q13126	Q9BQA1	O75348
Q9NZI8	O75964	Q86X55	O43520
Q96Q11	Q9H4Z3	P28074	P17980
P98194	Q01085	Q9ULH1	Q9NZ45
Q7Z794	Q99567	A0A1B0GWG1	Q9UJX2
Q8TAQ2	Q9UNS1	Q9NZI8	P54725-3
Q96D05	P16144-2	Q96Q11	A8MUM1
O14641	Q14554	P98194	Q8N5I2
Q2M2I8	Q96HP0	Q8TAQ2	A8K727
Q13268	P58107	O14641	J3QRU4
J3QLG5	H0Y547	Q2M2I8	P35914
Q92503	Q96C36	Q13268	O95292
Q16576	Q8TCX1	J3QLG5	Q9NR30
Q8WUB8	Q8IZT6	Q92503	O43181
E9PBC1	Q9BZ95	Q16576	E9PC15
Q9Y6M1	Q8IZH2	Q6V1X1	F8VW96
Q9P0J1	Q9BY44	E9PBC1	Q02388
A0A1W2PP10	Q9BQA1	Q9Y6M1	O00571
Q8TAA9	Q86X55	Q9P0J1	Q8TAF3
Q96BZ9	P28074	A0A1W2PP10	cRAP013
C9JWV9	Q9ULH1	V5IRT4	O96013
Q86YS7	A0A1B0GWG1	Q8TAA9	P04183
O15231	Q9NZI8	Q96BZ9	P08865
Q31612	Q9UL01	O15231	M0QZ22
P43121	Q96Q11	Q31612	Q8N490
Q02833	F8WD41	P43121	Q6XQN6
B3KVZ3	P98194	Q02833	B7Z6Z4
B4DKL7	Q7Z794	B3KVZ3	P18031
Q5JPH6	Q8TAQ2	O95707	P82914
E7ESY4	O14641	Q5JPH6	P30085
G3V4T7	Q2M2I8	E7ESY4	F8WA39
Q9UID3	Q13268	G3V4T7	A2ACR1
Q9BT22	J3QLG5	Q9UID3	A3KMH1
Q9NRH2	Q92503	Q9BT22	O60264
Q92614	Q16576	Q92614	G3V5N8
Q13131	Q8WUB8	Q13131	Q5VT06
Q9NQE9	E9PBC1	Q9NQE9	O43684
Q13257	C9JYJ0	Q13257	Q9H0H5
E7ERA6	Q9Y6M1	P49257	Q92734
P49257	Q9P0J1	O43760	Q15035
O43760	A0A1W2PP10	H3BNT4	Q9H1K0
H3BNT4	Q9BX63	Q99832	Q8IZ83
Q9NPE3	Q96BZ9	Q9UJX4	P20810-6
Q99832	Q86YS7	P51991	Q5W111
Q9UJX4	O15231	Q8MH48	Q96HY7
P51991	Q31612	Q12840	P07996
B7ZKQ9	P43121	B7ZKQ9	C9J5X1
Q16533	Q02833	Q99519	Q13043
Q9P0V9	B3KVZ3	Q16533	P04062
Q9Y6D9	O95707	Q9P0V9	E9PDF6
P28331	Q5JPH6	B1AHC3	Q08AD1-2
P09914	E7ESY4	Q9Y6D9	Q9H0U3
Q5EBL4	G3V4T7	P28331	Q5VWZ2
M0R0P8	H3BSW6	P09914	P26440
Q9Y605	Q9UID3	M0R0P8	A0A087X295
B7ZBM3	Q9BT22	P16298	Q71UM5
Q9BXK5	Q92614	Q9H6R0	P26572
Q96B45	Q13131	Q9BXK5	Q6WKZ4
P61201	Q9NQE9	K7EPS8	Q3LXA3
Q9Y230	Q13257	Q9Y2Z4	Q9H410
P38935	P49257	P61201	P13667
O14974	O43760	Q9Y230	P18669
P14406	H3BNT4	P38935	Q13753
Q96ME7	Q9NPE3	O14974	Q9Y4H2
Q5HYI7	Q99832	G3V4W4	Q7Z333
Q9H223	Q9UJX4	P14406	P41208
Q96GA3	P51991	Q9H223	F5H5D3
Q96DZ1	B7ZKQ9	Q96GA3	Q8NBM4
H0YNH1	Q99519	Q96DZ1	O15347
Q9UKV5	Q99766	Q9UKV5	P51668
Q9UKG1	Q16533	Q9UKG1	P63146
Q96JN8	Q9P0V9	Q96JN8	Q9NRZ9
E9PP21	Q9Y6D9	E9PP21	Q9BZD4
Q13873	P28331	Q9NWV4	G3V5R9
Q9NWV4	P09914	P07951-3	P13798
P07951-3	E7EM50	A0A1B0GW23	P13746
Q9Y6N5	M0R0P8	A6NKD9	P04066
A6NKD9	Q9Y605	Q53RE8	Q16778
Q53RE8	P16298	O75689	Q9H2H9
O75689	P29322	Q13347	P61204
Q13347	Q9BXK5	J3KNN5	C9JG87
J3KNN5	Q96B45	Q9BX10	E7ENY0
Q9BX10	K7EPS8	J3QQW2	Q9BZE4
Q7KZ85	Q9Y2Z4	Q7KZ85	H7BXI1
P15408	P61201	Q14517	Q9BYN0
Q14517	Q9Y230	Q15149-4	Q96DI7
Q15149-4	P38935	A0A0A0MS70	Q9BV57
A0A0A0MS70	O14974	Q15642-2	P14174
A6NHL2	G3V4W4	Q15262	Q99459
Q15642-2	Q9UN79	Q6ZMI0	cRAP087
Q15262	Q8NCT3	Q9HAB8	P43487
Q6ZMI0	Q5HYI7	Q9Y5B8	Q7Z4H8
Q9HAB8	Q9H223	Q9H7D0	A0A1W2PNY5
Q9Y5B8	Q96GA3	P52435	O60784
Q9H7D0	Q9UH92	Q96P16	Q7Z2T5
Q96P16	Q2TAM9	Q16775	Q05086
Q16775	Q96DZ1	P35270	Q9BV40
P35270	Q9UKV5	E7EM64	P09486
E7EM64	Q9UKG1	Q8NE71	Q9BRZ2
Q8NE71	Q96JN8	Q9NW75	Q16891-2
Q9NW75	E9PP21	Q9NVG8	Q14244
Q9NVG8	Q9NWV4	A0A0A0MT60	Q6UW68
Q9H5J4	P07951-3	P16220	O15118
A0A0A0MT60	E9PFW6	P19387	Q9BR61
P16220	A0A1B0GW23	O75976	Q9Y3M8
P19387	A6NKD9	O15182	P00390
O75976	O75689	P63165	Q9Y2H0-1
O75971	Q13347	Q53GS9	Q9H147
Q9H9L3	J3KNN5	Q96EL2	Q15464
O15182	Q9BX10	P28347	O14562
P63165	J3QQW2	Q99543	Q15393
Q53GS9	Q7KZ85	P42892	P41227
P28347	Q8IYQ7	O15260	Q8NBI6
Q99543	Q14517	A0A0C4DH49	Q13636
P42892	Q15149-4	P52298	L0R6Q1
P27449	A0A0A0MS70	Q96AX1	A0A0J9YVP6
P52298	A6NHL2	Q9NVN3-1	Q8NHP6
Q96AX1	Q15262	Q2M389	A0A0A0MRM9
J3QL71	Q6ZMI0	Q96MW5	A5PLL7
Q9NVN3-1	Q9HAB8	O75348	U3KQ69
Q9P2R6	Q9Y5B8	O43520	A0A087WYR0
Q2M389	Q9H7D0	P17980	F5H269
Q96MW5	Q96P16	Q9NZ45	Q96S44
O75348	Q16775	Q9UJX2	P98173
O43520	P35270	P54725-3	P21964
P17980	E7EM64	Q5JQP3	J3QR07
Q9NZ45	Q8NE71	Q05BS2	Q8IWR0
Q9UJX2	Q9NVG8	A8MUM1	Q7LG56
P54725-3	A0A0A0MT60	Q8N5I2	P29350
Q5JQP3	P19387	A8K727	Q15836
Q05BS2	O75976	J3QRU4	Q8WUF5
A8MUM1	Q9H9L3	P35914	Q6P5Z2
Q8N5I2	O15182	O95292	P26583
A8K727	P63165	E7EV89	Q9Y3Z3
Q9NXE4	Q53GS9	Q9NR30	P49792
J3QRU4	Q96EL2	O43181	O75940
A0A087WVC6	P28347	E9PC15	M0R366
P35914	Q99543	F8VW96	E9PHA2
Q8TET4	P42892	Q02388	P82675
Q9Y5Y0	P27449	O00571	Q56NI9
Q96BW5	O15260	P78381	Q96F44
O95292	A0A0C4DH49	Q8TAF3	J3QTR3
Q9NR30	P52298	cRAP013	A0A0U1RRB3
O43181	Q96AX1	O96013	Q6UW02
A6NK89	Q2M389	P04183	Q9BRX5
E9PC15	Q96MW5	P08865	O75165
F8VW96	O75348	Q9UHB6-4	A0A087WUQ6
Q02388	O43520	M0QZ22	Q02083
O00571	P17980	Q8N490	F8W809
Q8TAF3	Q9NZ45	P54278	A6NMQ1
cRAP013	Q9UJX2	O94864	Q14974
O96013	P54725-3	Q6XQN6	Q9Y224
P04183	A8MUM1	B7Z6Z4	P19367
P08865	Q8N5I2	P18031	Q9H0A8
M0QZ22	A8K727	Q9BY67	Q9BYC5
Q8N490	J3QRU4	P82914	P50991
Q96I15	P35914	P30085	Q15648
O94864	Q8TET4	F8WA39	D6RHI9
Q6XQN6	Q9Y5Y0	A2ACR1	Q9Y343
B7Z6Z4	O95292	A3KMH1	Q9NYY8
P18031	E7EV89	X6R717	P33240
P82914	Q9NR30	O60264	Q6PL18
P30085	O43181	G3V5N8	P35998
F8WA39	E9PC15	Q5VT06	P12236
A2ACR1	F8VW96	O43684	Q07864
A3KMH1	Q02388	Q9H0H5	P29373
O60264	O00571	Q92734	A0A1B0GUS7
O94762	P78381	Q15035	Q9H0A0
G3V5N8	Q8TAF3	Q9H1K0	Q14435
Q5VT06	cRAP013	F5GY88	Q96Q05
O43684	O96013	Q8IZ83	Q04837
J3QL63	P04183	P20810-6	Q9NR50
Q9H0H5	P08865	Q5W111	Q13630
Q92734	Q9UHB6-4	Q96HY7	E9PRJ8
Q15035	M0QZ22	P07996	P18887
Q9H1K0	Q8N490	C9J5X1	A0A087X0W8
F5GY88	P54278	Q13043	Q9UBP9
Q8IZ83	Q6XQN6	Q9BY11	O95747
P20810-6	B7Z6Z4	P04062	O75882
J3QRT0	P18031	E9PDF6	P11172
Q5W111	Q9BY67	Q08AD1-2	Q96T51
Q96HY7	P82914	Q96Q83	P39687
P07996	P30085	Q9H0U3	P49069
C9J5X1	F8WA39	Q5VWZ2	F5H3M2
Q13043	A2ACR1	P26440	Q9UJF2-2
Q9BY11	A3KMH1	P55199	Q9H6R4
P04062	O60264	A0A087X295	A0A087X211
F5H7W8	O94762	E9PC66	Q70EL4
E9PDF6	G3V5N8	Q71UM5	Q8NDT2
K7EMP8	Q5VT06	P26572	Q96SN8
Q08AD1-2	O43684	Q6WKZ4	P09382
Q8N0V3	Q9H0H5	Q3LXA3	Q5T440
Q96Q83	Q92734	Q9H410	Q9UL26
Q9H0U3	Q15035	P13667	Q8IX90
Q5VWZ2	Q9H1K0	Q9NQA3	Q5JVZ5
P26440	Q8IZ83	P18669	O00443
P55199	P20810-6	Q13753	Q9UJW0
A0A087X295	Q5W111	Q9Y4H2	Q03701
E9PC66	Q96HY7	E7EX92	P09012
Q71UM5	Q8IUX1	Q7Z333	P29353
P26572	P07996	P41208	O95793
Q6WKZ4	C9J5X1	F5H5D3	Q9H3C7
Q3LXA3	Q13043	Q8NBM4	O75054
Q9H410	P04062	O15347	Q16658
P13667	F5H7W8	P51668	Q9BPY3
P18669	E9PDF6	P63146	Q9NR45
Q13753	Q08AD1-2	Q9NRZ9	P50914
Q9Y4H2	A4D1U4	K7ELE3	Q9BW27
E7EX92	Q9H0U3	Q9BZD4	Q9Y4P8
Q7Z333	Q5VWZ2	G3V5R9	P07900
P41208	P26440	O00273-2	Q9NUI1
F5H5D3	A0A087X295	P13798	Q13885
Q8NBM4	Q71UM5	P13746	J3KNI1
O94806	P26572	P04066	Q92575
O15347	Q6WKZ4	Q16778	Q12923
P51668	Q3LXA3	Q9H2H9	P63220
P63146	Q9H410	P61204	Q96EY1
X6RK58	P13667	C9JG87	P27144
Q9NRZ9	P18669	P15882	I3L3E4
Q9BZD4	Q13753	E7ENY0	Q05823
G3V5R9	Q9Y4H2	K7EJH8	Q5VXN0
P13798	Q7Z333	Q9BZE4	Q1ED39
P13746	P41208	A0A087WUW0	Q9NUJ3
P04066	F5H5D3	A4D1P6	P18206
E9PC47	Q8NBM4	Q9NQH7	Q9NW64
Q16778	O94806	H7BXI1	A6NN50
Q9H2H9	O15347	Q9BYN0	Q9NW68-2
C9JQS9	P51668	Q96DI7	Q9NYR9
P61204	P63146	Q7L8L6	O43310-2
C9JG87	Q9NRZ9	Q9BV57	Q14156
E7ENY0	Q9BZD4	P14174	Q16531
O94844	G3V5R9	Q99459	P31947
Q9BZE4	P13798	cRAP087	Q5JSH3
E7EPW5	P13746	P43487	A0A0C4DGA2
H7BXI1	P04066	Q7Z4H8	Q8WXI9
Q9BYN0	Q16778	A0A1W2PNY5	P24941
Q96DI7	Q9H2H9	Q96TC7	P31946
Q9BV57	C9JQS9	Q7Z4S6	O15234
P14174	P61204	Q6ZWT7	Q969T9
Q9BVS5	F6VVE8	O60784	P56192
Q99459	C9JG87	Q7Z2T5	A0A0C4DG33
cRAP087	E7ENY0	Q05086	Q8N612
P43487	A6NMT1	Q9BV40	P33552
Q7Z4H8	K7EJH8	P09486	E9PGP6
A0A1W2PNY5	Q9BZE4	O60486	B4DHE8
Q96TC7	A4D1P6	Q9BRZ2	Q9BYD3
Q7Z4S6	Q9NQH7	Q9H8W3	Q9H3N1
O60784	E7EPW5	A0A0X1KG73	E7EU96
Q7Z2T5	O15075	Q16891-2	Q96ST3
Q05086	H7BXI1	Q14244	K7ELG9
Q9BV40	Q9BYN0	Q6UW68	P52565
P09486	Q96DI7	O15118	O00762
P32019	Q7L8L6	Q9BR61	P11908
K7EMX1	Q9BV57	Q9Y3M8	Q9H1B7
Q9BRZ2	P14174	Q9NX18	Q86VM9
Q9H8W3	Q99459	P00390	F8VWK8
Q16891-2	cRAP087	G3V1N3	Q9H4L7
Q14244	P43487	Q9Y2H0-1	Q02880
Q6UW68	Q7Z4H8	Q9H147	Q9UJU6
O15118	A0A1W2PNY5	Q15464	A0A0U1RRK1
Q9BR61	Q6ZWT7	O14562	M0R3D6
Q9Y3M8	O60784	Q15393	Q01105
Q8N3S3	Q7Z2T5	P41227	P55072
P00390	Q05086	Q8NBI6	Q9BV73
P13674	Q9BV40	Q5T5P2	Q14165
O14713	P09486	Q13636	Q9H832
F8WAN9	O60486	L0R6Q1	Q5VTL8
Q9Y2H0-1	Q9BRZ2	A0A0J9YVP6	O43278
Q9H147	A0A0X1KG73	Q8NHP6	A0A024RCR6
Q15464	Q16891-2	A0A0A0MRM9	Q8NFC6
O14562	Q14244	A5PLL7	A0A0C4DGQ8
Q15393	Q6UW68	E9PK91	Q8NBL1
P41227	O15118	U3KQ69	E9PKG1
Q8NBI6	Q9BR61	Q9Y624	Q13438
Q13636	Q9Y3M8	A0A087WYR0	O43657
L0R6Q1	Q9NX18	F5H269	Q15043
A0A0J9YVP6	Q5VST6	Q96S44	Q3LIE7
Q8NHP6	P00390	P98173	P23381
Q9H0K1	F8WAN9	P21964	B8ZZ77
A0A0A0MRM9	Q9Y2H0-1	J3QR07	Q9UMX0
A5PLL7	Q9H147	Q8IWR0	J3KQ48
U3KQ69	Q15464	Q7LG56	P10155
Q9Y624	O14562	P29350	D6RAA6
A0A087WYR0	Q15393	Q15836	K7ENL9
H7C2G2	P41227	Q6UX53	P46100
F5H269	Q7Z7C8	Q8WUF5	E9PHV5
Q96S44	Q8NBI6	P57081	Q9Y2X3
P98173	Q5T5P2	Q6P5Z2	Q15758
P21964	Q13636	P26583	J3KR44
J3QR07	L0R6Q1	K7EIE8	Q96G03
Q8IWR0	Q9Y653	Q9Y3Z3	O15381
Q7LG56	A0A0J9YVP6	P49792	Q99848
P29350	Q8NHP6	O75940	C9JIZ6
Q15836	P30492	M0R366	E7EVA0
F5H385	A0A0A0MRM9	E9PHA2	Q9H7X7
Q8WUF5	A5PLL7	P82675	Q5T0Z8
Q6P5Z2	U3KQ69	Q56NI9	Q9UNF0
P26583	A0A087WYR0	Q9NV31	Q96N66
K7EIE8	F5H269	Q96F44	P0DN79
A0A1X7SBT4	Q96S44	J3QTR3	E7EW49
Q9Y3Z3	P98173	A0A0U1RRB3	Q9NVP1
P49792	P21964	Q6UW02	P49720
O75940	J3QR07	Q9BRX5	C9JI98
M0R366	Q8IWR0	O75165	Q96K17
E9PHA2	Q7LG56	X6R9U5	Q9HBH0
P82675	P29350	A0A087WUQ6	D3DTX6
Q56NI9	Q68DH5	Q02083	P53367
Q9NV31	Q15836	Q969F1	Q9C0I1
Q96F44	Q6UX53	F8W809	F6RFD5
J3QTR3	Q8WUF5	A0A087WYG2	Q9UFG5
A0A0U1RRB3	P57081	A6NMQ1	O43719
Q6UW02	Q6P5Z2	Q14974	A0A0A0MSI2
Q9BRX5	P26583	Q9Y224	Q9P265
O75165	A0A1X7SBT4	P19367	P21399
A0A087WUQ6	Q9Y3Z3	Q9H0A8	Q9Y2L1
Q02083	P49792	Q9BYC5	A0A1W2PQV2
F8W809	O75940	P50991	O96007
E7EW39	M0R366	Q15648	P16989
A6NMQ1	E9PHA2	P36954	Q8WZA9
Q14974	Q5T4F4	D6RHI9	Q9NX58
Q9Y224	P82675	Q8TDH9	P82650
P19367	O95466	Q9Y343	Q13617
Q9H0A8	Q56NI9	Q9NYY8	O95391
Q9BYC5	Q96F44	P33240	Q4G0N4
P50991	J3QTR3	Q6PL18	B5MC59
Q15648	A0A0U1RRB3	P35998	P21281
D6RHI9	Q6UW02	P12236	Q9NY93
Q9H211	Q9BRX5	Q07864	Q9H9Q2
Q9Y343	O75165	P29373	B4DR61
Q9NYY8	A0A087WUQ6	A0A1B0GUS7	O43865
P33240	Q9Y5N6	Q9H0A0	Q6P3W7
Q6PL18	Q02083	Q14435	Q13451
P35998	F8W809	Q96Q05	Q13740-2
P12236	A0A087WYG2	Q04837	H0YKT5
Q07864	A6NMQ1	Q9NR50	J3KS15
Q6AWC2	Q14974	Q13630	Q8N3D4
P29373	Q9Y224	E9PRJ8	Q92820
A0A1B0GUS7	P19367	P18887	Q9UH65
Q9H0A0	Q9H0A8	A0A087X0W8	A0A0G2JMZ8
Q14435	Q9BYC5	Q9UBP9	Q96CS2
Q96Q05	P50991	O95747	Q9P273
Q04837	Q15648	O75882	Q96MW1
Q8NAN2	D6RHI9	P11172	G3V180
Q9NR50	Q9H211	Q96T51	Q9Y371
Q13630	Q9Y343	K7EKE4	Q86X29
E9PRJ8	Q9NYY8	P39687	Q14676
P18887	P33240	P49069	Q96RL1
A0A087X0W8	Q6PL18	P61601	P29083
Q9UBP9	P35998	O94885	Q96T23
O95747	P12236	Q5W0U4	Q6DKJ4
O75882	Q07864	F5H3M2	P62318
P11172	Q6AWC2	Q9UJF2-2	O14662
Q96T51	P29373	Q9H6R4	M0R2A0
A0A0C4DFT8	Q9H2C2	A0A087X211	Q9NXH9
P39687	A0A1B0GUS7	Q70EL4	P33176
P49069	Q96RR4	Q8NDT2	Q8N163
P61601	Q9H0A0	Q8N0S6	Q8WXA3-1
O94885	Q14435	H0YHD0	Q8NFF5
F5H3M2	Q96Q05	Q96SN8	Q15629
Q9UJF2-2	Q04837	P09382	Q9NUN5
P80217	Q9NR50	Q6ZRQ5	P80303
Q9H6R4	Q13630	Q5T440	Q9NZ63
A0A087X211	E9PRJ8	Q9UL26	C9JW51
Q70EL4	P18887	Q8IX90	Q13017
Q8NDT2	A0A087X0W8	Q5JVZ5	P35908
H7C2L7	Q9UBP9	Q9Y3Q8	Q9Y2S7
Q96SN8	O95747	O00443	Q9UDY2
P09382	O75882	Q9UJW0	Q10471
B4DY26	P11172	F5H101	Q9NTK5
Q5THK1	Q96T51	Q03701	Q2KHM9
Q5T440	A0A0C4DFT8	P09012	Q8IX04
Q9UL26	P39687	O43683	P39019
Q8IX90	P49069	P29353	Q15437
Q5JVZ5	Q5W0U4	O95793	E7EVX8
O00443	F5H3M2	Q9H3C7	Q01433
Q9UJW0	Q9UJF2-2	O75054	Q12893
F5H101	Q9H6R4	A0A0D9SFF8	Q9Y3A3
Q03701	A0A087X211	F6WR09	Q9Y5Y2
P09012	Q70EL4	Q16658	P10253
P29353	Q8NDT2	C9JY04	O43353
O95793	Q96SN8	Q9BPY3	A0A096LPI6
Q9H3C7	P09382	Q9NX31	Q96QD5
O75054	B4DY26	O14613	Q96C24
Q16658	Q5T440	Q9NR45	Q9H000
C9JY04	Q9UL26	P50914	Q9UHB7
Q9BPY3	Q8IX90	Q9BW27	Q92542
Q9NX31	Q5JVZ5	Q9Y4P8	O15145
Q9NR45	Q9Y3Q8	A0A087X0B7	Q9UNQ0
P50914	O00443	P07900	Q92576
Q9H3Q1	Q9UJW0	Q9NUI1	P63000-2
Q9BW27	Q7Z695	Q13885	Q00169
Q9Y4P8	Q03701	J3KNI1	Q9H6K1
A0A087X0B7	P09012	Q92575	Q9BSC4
P07900	P29353	Q12923	Q13509
Q9NUI1	O95793	P63220	Q6NUM9
Q13885	Q9H3C7	Q96EY1	Q13283
J3KNI1	O75054	Q96L73	Q8WVC0
Q92575	A0A0D9SFF8	P27144	Q99523
Q12923	F6WR09	I3L3E4	A0A0A0MTH3
P63220	Q16658	Q05823	Q96BZ8
Q96EY1	Q9BPY3	Q5VXN0	A0A1B0GUA3
Q96L73	Q96RR1	Q1ED39	Q8WUM0
P27144	O14613	Q9NUJ3	P36404
Q9HC44	Q9NR45	P18206	Q99615
I3L3E4	P50914	Q9NW64	Q86UK7
Q05823	O75110	A6NN50	Q96FN4
Q5VXN0	Q9H3Q1	Q9NW68-2	Q9UHR5
Q1ED39	Q9BW27	Q9NYR9	O95551
Q9NUJ3	Q9Y4P8	O43310-2	Q9UL15
P18206	P07900	Q14156	Q8WWI1-3
Q9NW64	Q9NUI1	Q16531	O60343
Q9Y324	Q13885	P31947	Q9NSD9
A6NN50	J3KNI1	Q5JSH3	P51610
Q9NW68-2	Q96LW7	A0A0C4DGA2	Q9Y5M8
Q9NYR9	Q92575	Q8WXI9	P11498
O43310-2	Q12923	P24941	P04792
Q14156	P63220	P31946	A0A096LNZ9
Q16531	Q96EY1	O15234	K7EK35
P31947	P27144	Q969T9	A0A087X060
Q5JSH3	Q9HC44	P56192	Q9H3K6
O00483	I3L3E4	Q8WU79	Q8IX01
A0A0C4DGA2	Q05823	A0A0C4DG33	I3L2L5
Q8WXI9	Q5VXN0	Q8N612	Q13217
P24941	O14939	A0A087WYS3	B3KNS4
P31946	Q1ED39	P0DPD7	Q7Z392
O15234	Q9NUJ3	P33552	Q9Y508
Q969T9	P18206	E9PGP6	A0AV96
P56192	Q9NW64	B4DHE8	Q96II8
Q8WU79	A6NN50	Q9BYD3	Q86W50
A0A0C4DG33	H7C270	Q9H3N1	F8VZJ2
Q8N612	Q9NW68-2	E7EU96	P51648
Q7L4E1	Q9NYR9	Q96ST3	P17301
A0A087WYS3	O43310-2	K7ELG9	Q9BYK8
O43731	Q14156	P52565	Q96PU8
Q9Y6J0	Q16531	O00762	O75131
P33552	P31947	P11908	Q9NXH8
E9PGP6	Q5JSH3	P23511	P48960
B4DHE8	O00483	Q9H1B7	Q9UQ84
Q9UPY6	A0A0C4DGA2	Q86VM9	P62070
Q9BYD3	Q8WXI9	F8VWK8	P67775
Q9Y256	P24941	Q9H4L7	A0A0X1KG71
Q9H3N1	P31946	Q02880	Q9GZQ3
E7EU96	O15234	Q9UJU6	P15170-3
P31327	Q969T9	A0A0U1RRK1	Q8NBX0
Q96ST3	P56192	Q9NQ34	Q9NSV4
K7ELG9	A0A0C4DG33	M0R3D6	Q8WV99
P52565	Q8N612	Q01105	Q92520
O00762	Q7L4E1	P55072	B5MC47
P11908	P33552	Q9BV73	A0A0A0MS54
Q9H1B7	E9PGP6	Q14165	H0YNW7
Q86VM9	B4DHE8	Q9H832	Q9UHY7
F8VWK8	Q9BYD3	Q5VTL8	P56945
Q9H4L7	Q9Y256	Q8IYW5	P06132
Q5TGY1	Q9H3N1	O43278	A8MU27
Q02880	E7EU96	A0A024RCR6	P39656
Q9UJU6	P31327	Q8NFC6	Q9NR31
A0A0U1RRK1	Q96ST3	O15427	P62906
Q9NQ34	K7ELG9	A0A0C4DGQ8	P49327
M0R3D6	P52565	E9PN48	O60573
P04004	O00762	Q8NBL1	H0YIV4
Q01105	P11908	E9PKG1	F5H5P2
P55072	Q9H1B7	Q13438	Q14669-2
Q9BV00	Q86VM9	O43657	Q9NZW5
Q9BV73	F8VWK8	Q15043	Q93050-1
Q14165	Q9H4L7	Q3LIE7	O94874
Q9H832	Q02880	P23381	H7C3Q6
P23025	Q9UJU6	B8ZZ77	Q7L5D6
Q5VTL8	A0A0U1RRK1	Q9UMX0	Q9P107
P26358	M0R3D6	J3KQ48	Q9NV96
Q8IYW5	P04004	P10155	Q9UPN6
O43278	Q01105	D6RAA6	Q9NZD2
A0A024RCR6	P55072	K7ENL9	Q86XP3
Q8NFC6	Q9BV73	P46100	Q8N1B4
O15427	Q14165	E9PHV5	Q5QNY5
A0A0C4DGQ8	Q9H832	Q9Y2X3	C9JK83
Q8NBL1	Q5VTL8	Q15758	E7EQ64
E9PKG1	O43278	J3KR44	Q13405
Q13438	A0A024RCR6	Q96G03	E9PB61
O43657	Q8NFC6	O15381	Q9H269
Q15043	A0A0C4DGQ8	Q99848	Q13151
Q3LIE7	Q9NSA3	C9JIZ6	B4DY09
P23381	E9PN48	E7EVA0	P42694
B8ZZ77	Q8NBL1	Q9H7X7	Q9BSQ5
Q9UMX0	E9PKG1	Q5T0Z8	Q9P2S5
J3KQ48	Q13438	J3KR05	Q13395
P10155	O43657	Q9UNF0	Q8IZQ5
D6RAA6	Q15043	Q96N66	Q8TEQ8
K7ENL9	Q3LIE7	P0DN79	A0A087WUD2
P46100	P23381	E7EW49	P38435
E9PHV5	A0A0J9YXX5	Q9NVP1	P30043
Q9Y2X3	B8ZZ77	P49720	O60518
Q15758	Q9UMX0	C9JI98	P62487
J3KR44	J3KQ48	Q96K17	Q96HC4
Q96G03	P10155	Q9HBH0	Q9ULX6
O15381	D6RAA6	D3DTX6	P30405
Q99848	K7ENL9	P53367	Q8NEF9
C9JIZ6	P46100	Q9C0I1	H3BMM9
E7EVA0	E9PHV5	F6RFD5	F5GY90
Q9H7X7	Q9Y2X3	Q9UFG5	O60513
Q5T0Z8	Q15758	O43719	P06753-5
J3KR05	J3KR44	A0A0A0MSI2	P55145
Q9UNF0	Q96G03	Q9P265	C9J0Q5
Q96N66	O15381	P21399	Q7L7X3
P0DN79	Q99848	Q9Y2L1	Q96PE3
D6R992	C9JIZ6	Q9Y2U5	O95714
H0Y6X7	E7EVA0	A0A1W2PQV2	Q96R05
I3L2J0	Q9H7X7	O96007	Q5QNW6
E7EW49	Q5T0Z8	P16989	Q93034
Q9NVP1	Q9UNF0	Q8WZA9	Q7Z417
P49720	Q96N66	Q9NX58	Q9NQX3
C9JI98	P0DN79	P82650	Q9UNX4
Q96K17	E7EW49	Q13617	P02533
Q9HBH0	J3QLK6	O95391	O15056
D3DTX6	Q9NVP1	Q9NWQ9	Q00535
P53367	P49720	Q4G0N4	Q9ULT8
Q9C0I1	C9JI98	B5MC59	Q86W92-4
F6RFD5	Q96K17	P21281	Q9UBE0
Q9UFG5	Q9HBH0	Q9NY93	D6RIY6
O43719	D3DTX6	Q9H9Q2	O95059
A0A0A0MSI2	P53367	B4DR61	Q9Y263
Q9P265	Q9C0I1	O43865	Q9UJX3
H0YJT9	F6RFD5	Q6P3W7	P82094
P21399	Q9UFG5	Q13451	Q9UNH7
Q9Y2L1	O43719	Q13740-2	Q2NL82
M0R3D4	A0A0A0MSI2	H0YKT5	A0A087X0X3
Q9Y2U5	Q9P265	J3KS15	O75676
A0A1W2PQV2	H0YJT9	Q8N3D4	O75818
O96007	P21399	Q92820	A0A087WZU8
P16989	Q9Y2L1	Q9UH65	Q5T8P6
Q8WZA9	Q9Y5Q0	A0A0G2JMZ8	Q9H9G7
Q9NX58	M0R3D4	Q96CS2	Q14674
P82650	A0A1W2PQV2	Q9P273	P36507
Q13617	O96007	D6RG30	P46821
O94953	P16989	Q96MW1	O00429
O95391	Q8WZA9	G3V180	Q9GZR1
Q4G0N4	Q9NX58	P52429	I3L1I3
B5MC59	P82650	Q9Y371	J3KRX5
P21281	Q13617	Q86X29	Q14137
Q9NY93	O95391	Q14676	Q96AC1
Q9H9Q2	Q4G0N4	Q96RL1	Q96P11
B4DR61	B5MC59	O95342	C9JG97
O43865	P21281	P29083	Q9UNF1
Q6P3W7	Q9NY93	O95997	Q99747
Q13451	Q9H9Q2	Q96T23	P26640
Q13740-2	B4DR61	Q6DKJ4	P61513
H0YKT5	O43865	Q96CB8	Q9Y617
J3KS15	Q6P3W7	P62318	Q15363
Q8N3D4	P17098	O14662	F5H5V4
Q92820	Q13451	M0R2A0	G3V0I5
Q9UH65	Q13740-2	Q9NXH9	O75116
A0A0G2JMZ8	H0YKT5	P33176	Q9H6L4
Q96CS2	J3KS15	Q8N163	O75694
Q9P273	Q8N3D4	Q8WXA3-1	O75815
Q96MW1	C9IYZ1	Q8NFF5	Q01581
Q9NRY2	Q92820	Q15629	P30622-2
G3V180	Q9UH65	O75445	O96020
Q9Y371	A0A0G2JMZ8	Q8NFH8	Q99871
Q86X29	Q96CS2	F8W8Z9	Q9UBP0
Q14676	Q9P273	Q9NUN5	Q7L2H7
Q96RL1	D6RG30	P80303	Q92522
P29083	Q96MW1	Q9NZ63	P49802
Q96T23	G3V180	H3BQQ2	Q9BRJ6
Q6DKJ4	Q15119	C9JW51	P18615
Q96CB8	P52429	Q13017	P25787
P62318	Q9Y371	P35908	Q15545
O14662	Q86X29	Q9Y2S7	A0A088AWN3
M0R2A0	Q14676	G3V325	O43765
Q9NXH9	Q96RL1	Q9UDY2	Q13637
P33176	P29083	Q10471	O75592
Q8N163	O95997	Q9NTK5	Q8ND56
Q8WXA3-1	Q96T23	Q2KHM9	P08559
Q8NFF5	D6REB5	Q8IX04	Q13200
P0C7X5	Q6DKJ4	P39019	O14734
Q15629	Q8N5I4	Q15437	C9JFR7
Q9NUN5	P62318	E7EVX8	Q9NQ29
P80303	O14662	Q01433	P03905
Q9NZ63	M0R2A0	Q12893	Q9H6E4
H3BQQ2	Q9NXH9	Q9Y3A3	Q8WVS4
C9JW51	P33176	Q9Y2G2	Q9NXA8
Q13017	Q8N163	Q9Y5Y2	Q14247
P35908	Q8WXA3-1	P10253	P28288
Q9Y2S7	Q8NFF5	O43353	O95486
G3V325	Q96GX2	A0A096LPI6	Q9UPQ9
Q9UDY2	Q15629	Q96QD5	P27708
Q10471	F8W8Z9	Q96C24	O95400
Q9NTK5	Q9NUN5	A2VDJ0	Q5W0H4
Q2KHM9	P80303	Q8N884	Q6DKI1
Q8IX04	Q9NZ63	Q9H8M2	Q96HQ2
P39019	B0QY29	Q9H000	Q13137
Q15437	C9JW51	Q9UHB7	Q96DU7
E7EVX8	Q13017	Q92542	B0QZ18
Q01433	F8VXD5	O15145	O75179
Q12893	P35908	Q9UNQ0	P36405
Q9Y3A3	Q9Y2S7	Q92576	Q6P6C2
Q9Y5Y2	B0QYH3	H7BY55	Q9H0C8
P10253	Q9UDY2	P63000-2	O43399
O43353	Q10471	O95379	Q92844
A0A096LPI6	Q9NTK5	Q00169	P46939
Q96QD5	Q2KHM9	Q9H6K1	C9JQ41
Q96C24	I3L2H6	Q9BSC4	Q8IUC4
P48723	Q8IX04	S4R3B5	Q9GZY8-2
Q9H8M2	P39019	Q13509	O15230
Q9H000	Q15437	Q6NUM9	O15121
Q9UHB7	E7EVX8	Q13283	P61081
Q92542	Q01433	Q8WVC0	Q9HC35
O15145	Q12893	Q99523	Q96QU8
Q96LT9	Q9Y3A3	A0A0A0MTH3	Q9BZG1
Q9UNQ0	Q9Y5Y2	Q96BZ8	E9PNK6
Q92576	P10253	A0A1B0GUA3	Q15050
H7BY55	O43353	Q8WUM0	Q9GZR7
P63000-2	A0A096LPI6	P36404	Q14764
O95379	Q96QD5	Q99615	H3BRV9
Q00169	Q96C24	Q86UK7	Q49A88
Q9H6K1	A2VDJ0	Q96FN4	Q9BSF4
Q9BSC4	Q8N884	Q9UHR5	K7EIN2
Q13509	P48723	O95551	Q9NPD8
Q6NUM9	Q9H000	Q9UL15	P62328
Q13283	Q3SXY8	Q8WWI1-3	O15160
Q8WVC0	Q9UHB7	O60343	Q14728
Q99523	Q92542	Q9NSD9	Q9UHI6
A0A0A0MTH3	O15145	Q9BXW7	Q14790
Q96BZ8	Q9UNQ0	P51610	Q86UE8
A0A1B0GUA3	Q96AG3	Q9Y5M8	E9PLR7
Q8WUM0	Q92576	P11498	Q9H5V9
P36404	P63000-2	U3KPX1	P46109
Q99615	Q00169	P04792	O95470
Q86UK7	Q9H6K1	A0A096LNZ9	P16333
Q96FN4	Q9BSC4	K7EK35	Q9HBH5
J3KPT4	S4R3B5	A0A087X060	A0A087WYT3
Q9UHR5	C9J7I0	Q9H3K6	Q5MNZ6
O95551	Q13509	Q8IX01	O95361
Q9UL15	Q6NUM9	S4R3Q9	Q92947
Q8WWI1-3	Q13283	I3L2L5	Q8WVP7
O60343	Q8WVC0	Q9Y2H1	Q8WUA2
Q9NSD9	Q99523	Q13217	P49184
P51610	A0A0A0MTH3	B3KNS4	Q86V48
Q9BXJ8	Q96BZ8	Q7Z392	P07858
Q9Y5M8	A0A1B0GUA3	Q9Y508	Q9BQ70
P11498	Q8WUM0	Q96N23	Q9BV94
Q9HCI6	P36404	A0AV96	Q2M1P5
P04792	H3BM52	Q96II8	Q99436
P31321	Q99615	Q86W50	Q9Y6I3
A0A096LNZ9	Q86UK7	F8VZJ2	Q7RTV0
K7EK35	Q96FN4	P51648	Q15746
A0A087X060	Q9UHR5	P17301	A0A1W2PNW1
Q9H3K6	O95551	P09601	Q9ULJ7
Q8IX01	Q9UL15	Q9BYK8	E5RGR0
Q96HB5	Q8WWI1-3	Q96PU8	P46783
I3L2L5	O60343	Q96SW2	P49589-3
Q13217	Q9NSD9	O75131	A0A0A0MRX1
B3KNS4	Q9BXW7	Q9NXH8	Q6WCQ1
Q7Z392	P51610	P48960	Q9ULP9
Q9Y508	Q9BXJ8	Q9UQ84	Q969E2
Q96N23	Q9Y5M8	P62070	P49770
O60353	P11498	P67775	Q13111
Q9H6K4-2	U3KPX1	A0A0X1KG71	Q9BQ69
A0AV96	P04792	Q9Y3C7	Q9BWT3
Q96II8	P31321	Q9GZQ3	Q9BW61
H0Y3H2	A0A096LNZ9	P15170-3	Q8IWZ8
O94952-1	K7EK35	Q8NBX0	B1AJY5
Q86W50	A0A087X060	Q8TF01	M0R0H5
A2RU67	Q9H3K6	Q9NSV4	Q02878
F8VZJ2	Q8IX01	Q9BWH2	Q9UL18
A0A087X0E7	S4R3Q9	Q8WV99	Q8N201
P51648	Q86Y39	Q92520	Q6VMQ6
P17301	Q96HB5	B5MC47	P22061
Q5T321	I3L2L5	A0A0A0MS54	Q96CW5
P09601	Q9Y2H1	H0YNW7	J3KNN7
Q9BYK8	Q13217	Q9UHY7	O75150
Q9H4G4	B3KNS4	P56945	P61764
Q96PU8	Q7Z392	P06132	Q96GG9
O75131	Q9Y508	A8MU27	P15586
Q9NXH8	O60353	P39656	Q96JQ2
P30305	Q9H6K4-2	Q9NR31	P49903
P48960	A0AV96	P62906	O43294
Q9UQ84	Q96II8	P49327	P11279
P62070	O94952-1	O60573	O00161
A6NDI8	Q86W50	Q8N2F6	Q9HB07
P67775	A2RU67	H0YIV4	Q16270
D6RAJ6	F8VZJ2	F5H5P2	P50613
A0A0X1KG71	P51648	Q14669-2	Q9Y6G3
Q9Y3C7	Q05084	Q9NZW5	Q8NCF5
Q9GZQ3	P17301	Q93050-1	P36957
P15170-3	Q5T321	Q9UKR5	B7WP74
Q8NBX0	Q9BYK8	O94874	Q6IQ49
Q8TF01	Q96PU8	H7C3Q6	F8VTV8
Q9NSV4	O75131	Q7L5D6	Q9UEY8-2
Q8WV99	Q9NXH8	Q9H8H2	Q9Y5V0
Q92520	P48960	Q9P107	P28676
B5MC47	Q9UQ84	Q9NV96	Q96CV9
A0A0A0MS54	P62070	Q9UPN6	Q9UN86
H0YNW7	P67775	Q9NZD2	F2Z2U4
Q9UHY7	D6RAJ6	Q86XP3	B4E0K5
P56945	A0A0X1KG71	Q8N1B4	H7C2N1
A0A0C4DFP4	Q9BZD2	P40189	Q5TC82
P06132	Q9GZQ3	Q5QNY5	Q6P158
A8MU27	H7C1I0	C9JK83	Q9Y383
P39656	P15170-3	E7EQ64	O43299
Q9NR31	Q8NBX0	Q13405	Q92968
P62906	Q9NSV4	E9PB61	P52789
Q9UK61	Q9Y5X9	Q9H269	Q9H2P0
P49327	Q8WV99	Q70CQ2	A0A0B4J220
O60573	Q92520	Q13151	Q9HBM6
H0YIV4	B5MC47	B4DY09	P67936-2
F5H5P2	A0A0A0MS54	P42694	P25786
Q14669-2	H0YNW7	Q9BSQ5	Q8ND04
Q9NZW5	Q9UHY7	Q9P2S5	Q9BPX5
Q93050-1	P56945	Q13395	Q9UEU0
Q9UKR5	A0A0C4DFP4	Q9P2K3	F5H5I6
O94874	P06132	Q8IZQ5	Q9UBT2
H7C3Q6	A8MU27	Q8TEQ8	F5H2F4
Q7L5D6	P39656	A0A087WUD2	Q5QPM7
Q86Y13	Q9NR31	P38435	Q9NQ48
Q9H8H2	P62906	P30043	Q9NVT9
Q9P107	Q9UK61	O60518	P61962
Q9NV96	P49327	P62487	P11233
Q9UPN6	O60573	Q96HC4	Q86TU7
Q9NZD2	Q8N2F6	Q8TCD1	Q15334
Q9NWF9	H0YIV4	Q9ULX6	E9PIR9
Q9NX61	F5H5P2	P30405	P59998
Q86XP3	Q14669-2	Q8NEF9	Q9NWH9
Q8N1B4	Q9NZW5	H3BMM9	Q04637
Q5QNY5	Q93050-1	F5GY90	Q8TDR0
O15156	O94874	O60513	P61086
C9JK83	H7C3Q6	P06753-5	H3BP13
E7EQ64	Q7L5D6	P55145	Q9NRN7
Q13405	Q86Y13	E5RFJ1	Q13433
E9PB61	Q9P107	C9J0Q5	O75629
Q9H269	Q9NV96	Q96PV7	Q05397
Q70CQ2	Q9UPN6	Q7L7X3	F5GZ97
Q13151	Q9NZD2	Q96PE3	Q8WZA0
B4DY09	Q9NWF9	O95714	O15460
P42694	Q86XP3	Q96R05	O75390
Q9BSQ5	Q8N1B4	Q5QNW6	Q8NDV7
Q9P2S5	P40189	Q93034	J3KS05
Q13395	Q5QNY5	Q7Z417	O95352
Q9P2K3	C9JK83	Q9NQX3	P11182
Q8IZQ5	E7EQ64	Q9UNX4	Q14457
Q8TEQ8	Q13405	Q86VQ0	A0A0C4DGG9
A0A087WUD2	E9PB61	P02533	A0A1W2PP11
P38435	Q9H269	O43295	Q15007
P30043	Q13151	O15056	P09936
O60518	B4DY09	Q00535	F8W9X7
P62487	P42694	E9PH99	M0QXF9
Q96HC4	Q9BSQ5	Q9ULT8	Q8IYB3
Q8TCD1	Q9P2S5	Q86W92-4	Q12872
Q96T58	Q13395	Q9UBE0	Q9BZF3
Q9ULX6	Q8IZQ5	D6RIY6	Q99536
P30405	Q8TEQ8	O95059	O95456
Q8NEF9	A0A087WUD2	Q9Y263	Q16698
Q9UGU0	P38435	Q9UGK3	A0A0G2JIW1
H3BMM9	P30043	Q9UJX3	Q15046
F5GY90	O60518	P82094	Q5VY60
O60513	P62487	Q9Y6X5	P54819
P06753-5	Q96HC4	Q9UNH7	Q9Y4C2
P55145	Q9ULX6	E7EN96	P31150
E5RFJ1	P30405	Q2NL82	P0DPB5
C9J0Q5	Q8NEF9	A0A087X0X3	P55212
Q7L7X3	Q9UGU0	O75676	Q9H857-2
Q96PE3	H3BMM9	O75818	Q9NYT0
O95714	H3BNK2	A0A087WZU8	F5GY05
Q96R05	F5GY90	Q5T8P6	O95831
Q5QNW6	O60513	Q9H9G7	O95394
Q93034	P06753-5	Q8NAT1	G8JLH6
Q7Z417	P55145	Q14674	Q8IWE2
Q12772	C9J0Q5	P36507	P51003
Q9NQX3	Q7L7X3	P46821	O00178
Q9UNX4	Q96PE3	O00429	O60507
Q8NCN5	O95714	Q9GZR1	Q9Y244
P02533	Q96R05	I3L1I3	P42766
O15056	Q5QNW6	J3KRX5	Q16629
Q00535	Q93034	Q14137	P47755
Q9ULT8	Q7Z417	Q13795	O00115
Q86W92-4	Q9NQX3	Q9Y2R4	A0A024R571
Q9UBE0	Q9UNX4	Q96AC1	P04350
D6RIY6	Q8NCN5	Q96P11	P78318
O95059	P02533	C9JG97	Q8WUQ7
Q9Y263	O15056	Q9UNF1	P60866
Q9UJX3	Q00535	Q99747	M0R2B7
P82094	Q9NTG7	P26640	Q15181
Q5SRH9	E9PH99	P61513	A0A1B0GW68
Q9UNH7	Q9ULT8	Q9Y617	Q96K76
Q2NL82	Q86W92-4	Q15363	Q6NS38
A0A087X0X3	Q9UBE0	F5H5V4	Q53H96
O75676	D6RIY6	G3V0I5	Q5JPE7
O75818	O95059	Q8IXQ6-2	Q9Y448
A0A087WZU8	Q9Y263	O75116	Q9H0V9
Q5T8P6	Q9UGK3	Q9H6L4	Q8IUF1
Q9H9G7	Q9UJX3	O75694	P19022
Q14674	P82094	O75815	Q9H0S4
P36507	Q9Y6X5	Q01581	P00966
P46821	Q9UNH7	Q86Y07	Q8IVD9
O00429	E7EN96	P30622-2	Q9UKA4
Q9GZR1	Q2NL82	O96020	Q15785
Q8N5S9	A0A087X0X3	Q99871	E5RIH5
I3L1I3	O75676	Q9UBP0	P49207
J3KRX5	O75818	Q7L2H7	Q9UK76
Q14137	A0A087WZU8	Q92522	P30040
Q9Y2R4	Q99808	P49802	Q08J23
Q96AC1	Q5T8P6	Q9BRJ6	H0Y5K5
Q96P11	Q9H9G7	P18615	P18859
C9JG97	Q8NAT1	P25787	Q96PK6
Q9UNF1	Q14674	Q9H204	O43896
Q99747	P36507	Q15545	O43615
P26640	Q9GZV1	A0A088AWN3	P62253
P61513	P46821	O43765	Q5T1B5
Q9Y617	O00429	Q13637	O43598
Q15363	Q9GZR1	O75592	C9JYQ9
F5H5V4	Q8N5S9	Q8ND56	Q9NVC3
G3V0I5	I3L1I3	P08559	Q14444
O75116	J3KRX5	Q13200	P48507
Q9H6L4	Q14137	O14734	F8VXU5
O75694	Q13795	C9JFR7	P08727
O75815	Q96AC1	Q9NQ29	Q8IWV8
Q01581	Q96P11	P03905	Q9HCN8
P30622-2	C9JG97	Q9H6E4	Q9Y6E2
O96020	Q9UNF1	A0A096LP22	O60610
Q99871	Q99747	Q8WVS4	Q9UKL0
Q9UBP0	P26640	Q9NXA8	J3KNF4
Q7L2H7	Q9BUE6	O43852-4	Q02338
Q92522	P61513	Q14247	H7C1N3
P49802	Q9Y617	P28288	Q8N684
Q9BRJ6	Q15363	O95486	P04899
P18615	F5H5V4	Q9UPQ9	Q02252
P25787	G3V0I5	P27708	P09972
Q15545	O75116	O95400	P41743
A0A088AWN3	O75394	Q5W0H4	B8A4K4
O43765	Q9H6L4	Q6DKI1	P50895
C9JM79	O75694	Q96HQ2	O75530
Q13637	O75815	Q13137	Q9BY77
O75592	Q01581	Q8NEV8	Q9P0L0
Q8ND56	Q86Y07	Q96DU7	K7EKI8
Q5T2W1	P30622-2	B0QZ18	Q9BRT9
P08559	O96020	P61077	Q0VDF9
Q13200	Q99871	O75179	Q6PL24
Q9UBS0	Q9UBP0	P36405	E7EX17
O14734	Q7L2H7	O75509	Q9H270
C9JFR7	Q92522	Q6P6C2	H0Y4R1
Q9NQ29	P49802	Q9BQ51	Q9NP72
P03905	Q9BRJ6	Q9H0C8	Q5EBL8
Q9H6E4	P18615	O43399	Q9P0M6
A0A096LP22	Q92989	Q92844	Q5VT52
Q8WVS4	P25787	P46939	Q7Z434
Q9NXA8	Q9H204	Q99967	Q96GD4
O43852-4	Q15545	C9JQ41	Q5TDF0
Q14247	A0A088AWN3	Q8IUC4	V9GYM8
P28288	O43765	Q9GZY8-2	O14757
O95486	C9JM79	O15230	O94966-5
Q9UPQ9	Q13637	O15121	P07942
Q9Y450-2	O75592	P61081	Q9BRR8
P27708	Q8ND56	Q9HC35	G3V3E8
P10072	Q5T2W1	P43353	O43175
O95400	P08559	Q96QU8	A0A087WXS7
Q5W0H4	Q13200	Q9BZG1	P42126
K7EM46	Q9UBS0	E9PNK6	Q8TE02
Q6DKI1	O14734	Q15050	Q9NVI7-2
Q96HQ2	C9JFR7	Q9GZR7	Q9H944
Q13137	Q9NQ29	Q14764	Q9Y4P3
Q96DU7	P03905	H3BRV9	Q8TCJ2
B0QZ18	Q9H6E4	Q49A88	Q8IW35
P61077	D6REA0	Q9BSF4	Q13098
O75179	Q8WVS4	K7EIN2	Q96GC5
Q6IEG0	Q9NXA8	Q9NPD8	P55036
P36405	Q14247	P62328	Q9NUG6
Q5JTJ3	P28288	O15160	Q9UJ83
Q6P6C2	O95486	Q14728	A0A0J9YXF2
Q9H0C8	Q9UPQ9	Q9UHI6	Q9Y4L1
O43399	Q9Y450-2	Q14790	O95861
Q92844	P27708	Q86UE8	O60294
P46939	O95400	E9PLR7	Q8IWX8
C9JQ41	Q5W0H4	Q9H5V9	Q7L0Y3
Q8IUC4	Q6DKI1	P46109	J3KQ18
Q9GZY8-2	Q96HQ2	O95470	E7ETK0
O15230	Q13137	P16333	P35790
O15121	Q8NEV8	Q9HBH5	Q14739
P61081	Q96DU7	A0A087WYT3	Q86U44
Q9HC35	B0QZ18	Q5MNZ6	O43390
P43353	O75179	O95361	P50995
Q96QU8	P36405	Q92947	Q9Y4Y9
Q9BZG1	Q5JTJ3	Q8WVP7	Q9Y5J6
E9PNK6	Q6P6C2	Q8WUA2	Q92692
Q15050	Q9BQ51	A6NDK9	Q9H4L5
Q9GZR7	Q9H0C8	P49184	Q15012
Q14764	O43399	Q86V48	Q96HV5
H3BRV9	Q92844	P07858	Q12765
Q49A88	P46939	Q9BQ70	P28072
Q9BSF4	C9JQ41	Q9BV94	O75822
K7EIN2	Q8IUC4	Q2M1P5	Q86W56
Q9NPD8	Q9GZY8-2	Q99436	P57772
P62328	O15230	Q9Y6I3	Q5SW79
O15160	O15121	O95900	A0A0G2JPP5
Q14728	P61081	Q7RTV0	A1A4S6
Q9UHI6	Q9HC35	Q86VQ1	Q9Y2G5-1
Q14790	Q96QU8	Q15746	Q04760
Q86UE8	Q9BZG1	Q99735	Q9NZD8
E9PLR7	E9PNK6	A0A1W2PNW1	Q92673
Q9H5V9	Q15050	Q9ULJ7	P61964
P46109	Q9GZR7	E5RGR0	P35221
B0YJ81	Q14764	P46783	P62314
O95470	H3BRV9	P49589-3	Q9NTX5
P16333	Q49A88	A0A0A0MRX1	Q96C92
Q9GZY4	Q9BSF4	Q6WCQ1	Q8TBC4
Q9HBH5	K7EIN2	Q9ULP9	P46937
H0YAP3	Q9NPD8	Q969E2	A0A0A0MTS2
A0A087WYT3	P62328	P49770	Q92979
Q9H930-1	O15160	Q13111	Q96RT1
Q5MNZ6	Q14728	Q9Y5G0	V9GZ56
O95361	Q9UHI6	Q9BQ69	P48147
Q92947	Q14790	Q9BWT3	P46108
Q8WVP7	Q86UE8	Q8N138	Q12834
Q8WUA2	E9PLR7	Q9BW61	Q96AE4-2
P49184	Q9H5V9	Q8IWZ8	V9GYY5
Q86V48	P46109	P15954	Q86YR5
P07858	O95470	B1AJY5	Q8IXQ3
Q9BQ70	P16333	Q8WYQ9	O75874
Q9BV94	Q9HBH5	M0R0H5	Q8NFD5
Q2M1P5	A0A087WYT3	Q02878	F5H2X7
Q99436	Q5JZH3	J3QLM1	D6RJ90
Q9Y6I3	Q5MNZ6	Q9UL18	Q9P2I0
O95900	O95361	Q8N201	P52756
Q7RTV0	Q92947	Q6VMQ6	A0A096LP25
Q15746	Q8WVP7	P22061	Q8IYA6
A0A1W2PNW1	Q8WUA2	Q3B7J2	P49915
Q5T4B2	A6NDK9	Q96CW5	Q5GLZ8
Q9ULJ7	P49184	J3KNN7	Q96JH7
E5RGR0	Q86V48	O75150	A0JNW5
P46783	P07858	P61764	P11169
Q96MD7-1	Q9BQ70	Q96GG9	P62316
P49589-3	Q9BV94	P15586	P62277
A0A0A0MRX1	Q2M1P5	Q96JQ2	Q9NT62
Q6WCQ1	Q99436	P49903	E9PSG9
Q9ULP9	Q9Y6I3	O43294	Q9UIC8
Q969E2	Q7RTV0	P11279	Q86WA8
P49770	Q15746	O00161	Q86YS6
Q13111	Q86UB9	Q9HB07	O60551
Q9BQ69	A0A1W2PNW1	Q16270	P20618
Q9BWT3	O75052	Q13769	O95260
Q8N138	Q5T4B2	P50613	A0A087X0M4
Q9BW61	Q9ULJ7	Q9Y6G3	A0A0A0MRM8
Q7Z6M4	E5RGR0	Q8NCF5	H3BSM7
Q8IWZ8	P46783	P36957	O43583
P15954	P49589-3	B7WP74	E9PR71
B1AJY5	J3KS54	Q6IQ49	Q9Y620
M0R0H5	A0A0A0MRX1	F8VTV8	Q5SQP8
Q02878	Q6WCQ1	Q9UEY8-2	P45985
Q9P0K8	Q9ULP9	Q96AB6	P43246
Q9UL18	Q969E2	Q7Z7K6	O43818
Q8N201	P49770	A0A0C4DGA7	Q03518
Q6VMQ6	Q13111	Q9Y5V0	P67870
P22061	Q9Y5G0	P28676	Q9BSJ8
Q3B7J2	Q9BQ69	Q96CV9	P06493
Q96CW5	Q9BWT3	Q9UBV8	Q9HD15
J3KNN7	Q9BW61	Q9UN86	Q86Y82
O75150	Q8IWZ8	F2Z2U4	Q9P2B4
P61764	B1AJY5	B4E0K5	Q7Z7H5
Q96GG9	Q8WYQ9	H7C2N1	P41567
P15586	M0R0H5	Q5TC82	P35580
Q96JQ2	Q02878	H7BZK6	Q9UNP9
P49903	J3QLM1	Q6P158	P19474
O43294	Q9UL18	Q9Y383	P07948
P11279	Q8N201	F8VQD9	P18085
O00161	Q6VMQ6	Q9NX01	P34897
Q9HB07	P22061	O43299	P78537
Q16270	Q96CW5	Q92968	Q5VYS8
Q13769	J3KNN7	P52789	F6WH68
P50613	O75150	Q12800	O75376
Q9Y6G3	P61764	O43257	Q9H1A3
Q8NCF5	Q96GG9	Q9NSG2	Q9NZU5
P36957	P15586	Q3V6T2	Q9Y490
B7WP74	Q96JQ2	Q9H2P0	P39060
Q6IQ49	P49903	A0A0B4J220	Q86V21
F8VTV8	O43294	Q9HBM6	Q5T7N3
Q9HBU6	P11279	P67936-2	Q9Y3U8
Q9UEY8-2	O00161	P25786	Q9NX08
A0A0C4DGA7	Q9HB07	Q8ND04	P04626
Q9Y5V0	Q16270	P27816-5	Q99460
P28676	P50613	Q9BPX5	H0YNG3
Q96CV9	Q9Y6G3	Q9UEU0	Q96GM8
F5H0R1	Q8NCF5	H0YKV4	P52292
E9PC69	P36957	F5H5I6	Q99640
Q9UN86	B7WP74	Q9UBT2	P42771
F2Z2U4	Q6IQ49	F5H2F4	Q9Y2S6
B4E0K5	F8VTV8	Q5QPM7	P61106
H7C2N1	Q9UEY8-2	Q9NQ48	Q86VN1
Q9UK39	Q96AB6	Q8NF91	Q9NRF9
Q6UVY6	Q7Z7K6	Q9NVT9	P21333
Q5TC82	Q9Y5V0	P61962	P15289
Q6P158	P28676	P11233	P60520
Q9Y383	Q96CV9	Q86TU7	Q9Y6M9
O43299	Q9UBV8	Q15334	P20337
Q92968	Q9UN86	E9PIR9	P62917
P52789	F2Z2U4	P59998	P00403
Q9H2P0	B4E0K5	Q6NSJ5	Q9NVR5
Q9Y2V0	H7C2N1	Q9UBB5	P50402
A0A0B4J220	Q9UK39	Q9NWH9	P49419-2
F8WCL7	Q5TC82	Q04637	Q9H081
Q9HBM6	Q6P158	Q8TDR0	P52948
P67936-2	Q9Y383	P61086	Q86WQ0
P25786	F8VQD9	H3BP13	P62241
A0A087WZ50	Q9NX01	Q9NRN7	P51148
Q8ND04	O43299	Q13433	Q8TAT6
Q9BPX5	Q9C037	O75629	Q9Y5P6
Q9UEU0	Q92968	Q05397	Q9BRT6
H0YKV4	P52789	Q92585	P51397
F5H5I6	Q12800	F5GZ97	O60763
Q9UBT2	Q9NSG2	Q8WZA0	Q9UII4
F5H2F4	Q9H2P0	Q9H2C0	Q9UHY1
Q5QPM7	Q13901	O15460	Q15121
C9JQQ2	A0A0B4J220	O75390	Q13425
Q9NQ48	F8WCL7	Q8NDV7	O75937
Q8NF91	Q9HBM6	J3KS05	P23229-6
Q16584	P67936-2	O95352	Q9Y5S9
Q9NVT9	P25786	P11182	O00422
P61962	O95476	Q14457	Q15020
P11233	Q8ND04	A0A0C4DGG9	Q92922
Q86TU7	Q9BPX5	A0A1W2PP11	Q7KZI7
Q15334	Q9UEU0	Q15007	Q8IZP0-9
E9PIR9	F5H5I6	P09936	Q8TF72
P59998	Q9UBT2	F8W9X7	Q6P4E1-4
Q9NWH9	F5H2F4	M0QXF9	Q9BRK4
Q04637	Q5QPM7	Q8IYB3	Q8IVT2
Q8TDR0	Q9NQ48	Q12872	Q96CW1
P61086	P98160	Q9BZF3	Q5QP56
H3BP13	Q16584	Q96GC6	Q08257
Q15554	Q9NVT9	Q99536	O43488
P14859	P61962	O95456	O15551
Q9NRN7	P11233	Q16698	P14927
Q13433	Q86TU7	P04233-2	Q8IZL8
O75629	Q15334	A0A0G2JIW1	A0A1B0GUS4
Q05397	E9PIR9	Q15046	Q13595
Q92585	P59998	Q60I27	P43034
F5GZ97	Q6NSJ5	Q5VY60	Q14318
Q8WZA0	Q9NWH9	P54819	Q9Y4F5
O15460	Q04637	O95169	Q9NS69
O75390	Q8TDR0	Q9Y4C2	Q15386
Q8NDV7	P61086	P31150	Q9UMZ2
J3KS05	Q5SXQ8	P0DPB5	Q9GZP4
O95352	H3BP13	P55212	O75330
P11182	P14859	Q7RTS9	Q13443
F8VRE8	Q9NRN7	A0A0A0MSJ9	F5GWN5
Q14457	Q13433	Q9H857-2	P25205
A0A0C4DGG9	O75629	Q9NYT0	P34949
A0A1W2PP11	Q05397	F5GY05	Q9HAW4
Q15007	F5GZ97	O95831	Q92878
P09936	Q8WZA0	O95394	Q16537
F8W9X7	Q9H2C0	G8JLH6	Q15813
M0QXF9	O15460	Q8IWE2	A0A1W2PRL5
Q8IYB3	O75390	Q9Y5B0	Q9Y6Q5
Q12872	Q8NDV7	G3V314	Q7Z6K5-2
Q9BZF3	J3KS05	P51003	E7EWW0
Q96GC6	O95352	O00178	Q86UY6
Q99536	P11182	O60507	P32322
O95456	F8VRE8	Q9Y244	P11766
Q9UEE5	Q14457	P42766	P20591
Q16698	A0A0C4DGG9	Q16629	Q9UJ41
A0A0G2JIW1	A0A1W2PP11	P47755	Q13371
Q15046	Q15007	O00115	Q6NXG1
G5E9C2	P09936	Q86YN1	O95757
Q5VY60	F8W9X7	O60512	J3KN16
P54819	M0QXF9	A0A024R571	P32321
Q9Y4C2	Q8IYB3	Q9NX76	Q7L2E3-2
P31150	Q12872	P04350	P16949
P0DPB5	Q9BZF3	A0A1B0GTG1	O75175
P55212	Q8TAD4	P78318	Q13625
Q5T1M5-2	Q99536	Q8WUQ7	Q96ND0
A0A0A0MSJ9	O95456	P60866	F6SS63
Q9H857-2	O15069	M0R2B7	P62304
Q9NYT0	Q9UEE5	Q15181	P33992
F5GY05	Q16698	A0A1B0GW68	G3V1L9
O95831	A0A0G2JIW1	P62380	A8MZB2
O95394	Q15046	Q96K76	Q15370
G8JLH6	G5E9C2	Q8WUH6	A0A1W2PQ51
Q8IWE2	Q60I27	Q6NS38	P16278
Q9Y5B0	Q5VY60	Q53H96	H0YHA7
P51003	P54819	Q5JPE7	O14578-4
O00178	O95169	Q9Y448	P04049
O60507	Q9Y4C2	Q9H0V9	Q14289
Q9Y244	P31150	Q8IUF1	Q969F9
P42766	P0DPB5	P19022	H7BXH2
Q9UJ68	P55212	Q9H0S4	Q92547
Q16629	Q7RTS9	P00966	P29317
P47755	Q9H857-2	U5GXS2	Q9Y446
O00115	Q9NYT0	Q8IVD9	P62312
O60512	F5GY05	Q9UKA4	I3L3Z2
A0A024R571	G3V3D6	Q15785	K7EJE1
P04350	O95831	E5RIH5	P51452
P78318	O95394	P49207	P13645
Q8WUQ7	G8JLH6	Q9UK76	Q13541
P60866	Q8IWE2	P30040	Q13057
M0R2B7	P82932	Q08J23	Q15036
Q15181	P51003	H0Y5K5	Q15904
A0A1B0GW68	O00178	P62273	P26006
P62380	O60507	P18859	cRAP112
E5RI52	Q9Y244	Q96PK6	Q9BSV6
Q96K76	P42766	O43896	O75477
Q6NS38	Q9UJ68	O43615	Q9BTV4
Q53H96	Q16629	P16989-2	Q96H35
Q5JPE7	Q6PCD5	Q9HBL7	Q8IUR7
Q9Y448	P47755	P62253	Q04724
Q9H0V9	O00115	Q5T1B5	J3QRV5
Q8IUF1	Q86YN1	O43598	Q6NUQ1
P19022	Q96G97	C9JYQ9	D6RAR4
Q9H0S4	A0A024R571	Q9NVC3	A0A087WT44
P00966	Q9NX76	Q14444	Q9BUP3-3
Q8IVD9	P04350	P48507	Q709F0
Q9Y2E5	P78318	A0A0U1RQY7	P42566
Q9UKA4	Q8WUQ7	F8VUW5	Q96GK7
Q15785	P60866	F8VXU5	Q9UBL3
E5RIH5	M0R2B7	P08727	P24821-4
P49207	E9PNS0	Q8IWV8	Q9BV20
Q9UK76	Q15181	Q9HBI1	Q13618
P30040	A0A1B0GW68	Q5T200	O95816
Q08J23	Q96K76	H0YIC4	Q969G3
H0Y5K5	Q6NS38	Q9HCN8	Q8TDX7
P18859	Q53H96	Q9Y6E2	M0QWZ7
Q96PK6	Q8WV19	O60610	P61006
O43896	Q5JPE7	Q9UKL0	Q14690
Q96HN2-2	Q9Y448	O60269	Q9Y6E0
O43615	Q9H0V9	J3KNF4	P18077
Q9HBL7	Q8IUF1	Q02338	O60716-3
Q9UHV7	P19022	H7C1N3	Q9BZI7
P62253	Q9H0S4	P24468	Q9ULW3
Q5T1B5	P00966	A0AVI4	Q8TDB6
O43598	U5GXS2	Q05932	P55327
C9JYQ9	Q8IVD9	Q8N684	O43314
Q9NVC3	Q9Y2E5	P04899	Q6T4R5
Q14444	Q9UKA4	Q02252	Q9BUR4
P48507	Q15785	P09972	P50443
F8VUW5	E5RIH5	A0A0A0MQX1	A7KAX9
Q99496	P49207	P41743	P51665
F8VXU5	Q9UK76	B8A4K4	P09493-10
Q9H4I2	P30040	P50895	O15371
P08727	Q08J23	O75530	A0A1B0GTL5
Q8IWV8	H0Y5K5	K7N7B3	O75044
Q5T200	P62273	Q9BY77	E7EN19
Q9HCN8	P18859	P62491	Q8N122
Q9Y6E2	Q96PK6	Q9P0L0	P04264
O60610	O43896	K7EKI8	Q96EY5
Q9UKL0	Q96HN2-2	Q9BRT9	P36578
O60269	O43615	Q0VDF9	A0A0G2JJD3
J3KNF4	P16989-2	Q9NYQ6	E7EN73
Q02338	P62253	Q6PL24	P17987
H7C1N3	Q5T1B5	E7EX17	Q7Z3B4
Q8N684	O43598	Q9H270	Q9Y6K9
P04899	C9JYQ9	H0Y4R1	Q9HB40
Q02252	Q9NVC3	Q9NP72	P0CG08
P09972	Q14444	O43301	Q9BVI4
A0A0A0MQX1	P48507	Q5EBL8	O43427
P41743	A0A0U1RQY7	Q9P0M6	P05386
B8A4K4	Q99496	Q5VT52	Q8WXD5
P50895	F8VXU5	Q7Z434	P54886
O75530	Q9H4I2	Q96GD4	Q8TCS8
E9PM19	P08727	Q5TDF0	Q9UI12
Q9BY77	Q8IWV8	V9GYM8	P35249
P62491	Q9HCN8	O14757	Q9UBQ5
Q9UHF1	Q9Y6E2	Q8NCC3	F8W7U3
Q9P0L0	O60610	O94966-5	Q86UU1
K7EKI8	Q9UKL0	P07942	C9J384
Q9BRT9	J3KNF4	Q9BRR8	Q9BY32
Q86XK3	Q02338	Q99487	Q5BKZ1
Q0VDF9	H7C1N3	G3V3E8	Q9UPQ0
Q9NYQ6	Q05932	O43175	Q8N9N2-2
Q6PL24	Q8N684	A0A087WXS7	Q86UE4
E7EX17	P04899	P42126	O15541
Q8TAC2	Q02252	Q86UW9	Q96G01
Q9H270	P09972	Q8TE02	P62269
H0Y4R1	P57723	Q9NVI7-2	Q9BYT8
Q9NP72	P41743	Q9H944	P49757
O43301	B8A4K4	Q9Y4P3	Q9UK59
Q5EBL8	P50895	Q8TCJ2	P16401
Q9P0M6	O75530	O00212	Q9P2G1
Q5VT52	E9PM19	Q8IW35	P43155
Q7Z434	Q9BY77	Q13098	V9GY86
Q96GD4	O95835	Q96GC5	B5MDF5
Q9NXG6	Q9P0L0	P55036	Q5JWF2
Q5TDF0	K7EKI8	Q9NUG6	Q2KHT3
V9GYM8	Q9BRT9	Q9UJ83	Q9Y4W6
O14757	Q86XK3	A0A0J9YXF2	P16435
O94966-5	Q0VDF9	Q9Y4L1	A0A0A0MQW0
P07942	Q6PL24	Q7Z7A1	Q7L9L4
Q9BRR8	E7EX17	O95861	Q9NZ32
P42575	Q9H270	O60294	Q5EB52
G3V3E8	H0Y4R1	Q8IWX8	P49411
P13796	Q9NP72	Q7L0Y3	Q9Y487
O43175	Q5EBL8	J3KQ18	Q9Y5L0
A0A087WXS7	Q13303	E7ETK0	O95834
P42126	Q9P0M6	O94916	Q15796
Q8TE02	Q5VT52	P35790	Q9H788
Q9NVI7-2	Q7Z434	Q14739	P00367
Q9H944	Q96GD4	Q86U44	A8MPP1
Q9Y4P3	Q9NXG6	Q6P3X3	Q7L3B6
Q8TCJ2	Q5TDF0	O43390	G5E994
Q8IW35	V9GYM8	P50995	Q9ULC4
Q13098	O14757	Q9Y4Y9	Q9NTJ3
Q96GC5	Q8NCC3	Q9Y5J6	Q8WXF1
P55036	O94966-5	Q92692	P10768
Q9NUG6	P07942	Q9H4L5	Q8WU76
Q9UJ83	Q9BRR8	Q15012	Q9NW82
A0A0J9YXF2	P42575	Q96HV5	Q9BZJ0
P35354	Q99487	F8WC89	P11413
Q9Y4L1	G3V3E8	Q12765	A0A0U1RQE4
Q9NT68	O43175	P28072	E9PF16
A0A0B4J2A0	A0A087WXS7	O75822	P37235
O95861	Q8IWB1	Q86W56	Q6VEQ5
O60294	P42126	P57772	O00505
Q8IWX8	Q86UW9	Q5SW79	P02538
Q7L0Y3	Q8TE02	A0A0G2JPP5	P49755
J3KQ18	Q9NVI7-2	A1A4S6	cRAP014
E7ETK0	Q9H944	Q9Y2G5-1	Q96D46
O94916	Q9Y4P3	Q04760	E9PJX4
P35790	Q8TCJ2	Q9NZD8	O60476
Q14739	O00212	Q92673	Q7L2R6
Q8NBM8	Q8IW35	P61964	Q96AG4
Q86U44	Q13098	P35221	P53582
O43390	Q96GC5	P62314	Q658Y4
P50995	P55036	Q9NTX5	Q9Y4B6
Q9Y4Y9	Q9NUG6	Q96C92	Q8WXG6-4
Q9Y5J6	Q9UJ83	Q8TBC4	Q9P031
Q92692	A0A0J9YXF2	Q13951	Q12904
Q8IZX4	Q9Y4L1	P46937	A0A0A0MSB8
Q9H4L5	O95861	A0A0A0MTS2	Q5SWX8
Q15012	O60294	Q92979	Q12955
Q96HV5	Q8IWX8	Q96RT1	Q96QG7
O14832	F8VRK6	V9GZ56	Q99471
Q12765	Q7L0Y3	P48147	Q9Y266
A0A1W2PR17	J3KQ18	Q9NPD3	Q9UBQ7
J3KRX2	E7ETK0	P46108	Q14691
P28072	P35790	Q12834	P42285
O75822	Q14739	Q9NUS5	Q99933
O00562	Q8NBM8	Q96AE4-2	Q9BXV9
Q86W56	Q86U44	Q15906	Q5T0W9
P57772	Q6P3X3	V9GYY5	Q96M27
P28702	O43390	Q86YR5	P06280
Q5SW79	H3BU04	Q8IXQ3	D6REX3
A0A0G2JPP5	P50995	O75874	Q9Y6Q9
A1A4S6	Q9Y4Y9	Q8NFD5	P20339
E9PBE1	Q9Y5J6	A6NFS0	F8W689
Q9Y2G5-1	Q92692	F5H2X7	P36543
Q04760	Q9H4L5	Q01850	P57764
Q9NZD8	Q15012	D6RJ90	P09525
Q92673	Q96HV5	Q9P2I0	Q15369
P61964	O14832	P52756	Q5JRA6
P35221	Q12765	A0A096LP25	P05423
P62314	Q9NQL9	Q8IYA6	Q04917
Q9NTX5	P28072	P49915	C9J3D7
Q96C92	O75822	Q5GLZ8	Q9NRF8
Q8TBC4	Q86W56	Q96JH7	P53634
P46937	P57772	A0JNW5	P61009
A0A0A0MTS2	P28702	P11169	P51398
Q92979	Q5SW79	P62316	Q12972
Q96RT1	A0A0G2JPP5	Q5BJF6	Q96GZ6-9
V9GZ56	A1A4S6	O14772	Q86TX2
P48147	E9PBE1	Q9BW62	Q00587
Q9NPD3	Q9Y2G5-1	P62277	A2RRP1
P46108	Q04760	H0Y7L6	P14618-2
Q12834	Q9NZD8	Q9NT62	Q9NV56
Q6NVV7	Q92673	E9PSG9	E7EPM6
Q96AE4-2	Q7L775	Q8IZ08	Q13356
A2ABF8	P61964	Q9UIC8	Q8N3E9
Q15906	P35221	Q86WA8	Q9P2W9
V9GYY5	P62314	Q86YS6	Q13033
A0A087WZQ5	Q9NTX5	O60551	Q9UNN5
Q5SW96	Q96C92	Q9BRV8	B5MCF9
Q86YR5	Q8TBC4	P20618	O95989
Q8IXQ3	P46937	O95260	O14828
O75874	A0A0A0MTS2	A0A087X0M4	Q9UHA4
Q8NFD5	Q92979	A0A0A0MRM8	P52888
F5H2X7	Q96RT1	H3BNT2	P52732
D6RJ90	V9GZ56	H3BSM7	P09493-8
Q9P2I0	P48147	O43583	Q9H6Y2
P52756	P46108	J3QL74	O15254
A0A096LP25	Q12834	E9PR71	K7ENR6
Q8IYA6	Q9NUS5	Q9Y620	Q9H2U1
P49915	Q96AE4-2	Q5SQP8	P14735
Q96JC9	A2ABF8	P45985	O43318
Q5GLZ8	V9GYY5	P43246	Q8N335
Q96JH7	Q86YR5	Q6IA86	Q9NQ88
A0JNW5	Q8IXQ3	O43818	O14745
P11169	O75874	Q03518	P10620
P62316	Q8NFD5	P67870	Q9NVZ3
F8W7C6	F5H2X7	Q9BSJ8	Q5VZK9
Q9Y2H2	D6RJ90	P06493	Q96CN9
P62277	Q9P2I0	Q9H9B1	Q9NUQ6
A0A087WYW7	P52756	Q9HD15	P42765
Q9NT62	A0A096LP25	Q86Y82	P00441
A0A0A0MRI1	Q8IYA6	Q9P2B4	Q96RT8
E9PSG9	P49915	Q7Z7H5	P61326
Q9UIC8	Q5GLZ8	Q96RF0	Q13470-2
Q86WA8	Q96JH7	P41567	Q9UHA3
Q86YS6	A0JNW5	P35580	P45954
O60551	P11169	Q9UNP9	Q96BN8
P20618	P62316	P19474	P49458
B1B0G8	Q5BJF6	P07948	O94925-3
O95260	O14772	P18085	A0A087WV05
A0A087X0M4	F8W7C6	P34897	O60563
B1AKB4	Q9BQ15	P78537	H0YJV7
A0A0A0MRM8	P62277	Q5VYS8	P00533
H3BNT2	H0Y7L6	H7BXY5	Q68E01-2
H3BSM7	Q9NT62	F6WH68	Q96GQ7
Q99732	A0A0A0MRI1	O75376	Q9BRR6
O43583	E9PSG9	Q9H1A3	P62753
E9PR71	Q8IZ08	Q9NZU5	Q9UHD9
Q9Y620	Q9UIC8	Q9Y490	A5YKK6
Q5SQP8	Q86WA8	P39060	Q9NX40
P45985	Q86YS6	Q86V21	D3YTB5
B4DJL6	O60551	Q5T7N3	Q9H6H4
P43246	Q9BRV8	Q9Y3U8	O75533
O43818	P20618	Q9NX08	Q9BXB4
Q14134	B1B0G8	P04626	Q92917
Q03518	O95260	Q99460	P62308
P67870	A0A087X0M4	Q53GT1	Q96DV4
Q9BSJ8	A0A0A0MRM8	H0YNG3	Q8NF37
P06493	H3BSM7	Q96GM8	O43324
Q9H9B1	Q99732	P52292	Q70Z53
Q9HD15	O43583	Q99640	P62699
Q86Y82	E9PR71	P42771	Q9Y657
Q9P2B4	Q9Y620	Q9Y2S6	Q9NPF5
Q9BVK8	Q5SQP8	P61106	O14737
Q06330	P45985	Q86VN1	Q6PI48
Q7Z7H5	P43246	Q9NRF9	Q9H8T0
Q96RF0	Q6IA86	P21333	P15104
P41567	O43818	P15289	Q86XL3
P35580	Q03518	P60520	Q9HB09
Q9UNP9	P67870	Q9ULD6	Q9P270
P19474	Q9BSJ8	Q9Y6M9	P30041
P07948	P06493	P20337	Q8N668
Q6ZN06	Q9HD15	P62917	Q15149
P18085	Q86Y82	Q9NR19	Q9Y6W3
P34897	Q9P2B4	P00403	P53004
P78537	Q7Z7H5	Q86XN7	A0A0G2JPF8
Q5VYS8	Q9H2P9	Q9NVR5	H3BPC4
Q5TCQ9	P41567	P50402	P11234-2
F6WH68	P35580	P49419-2	Q9NW15
O75376	Q9UNP9	Q9H081	P51608
Q9H1A3	P19474	P52948	Q9HA64
Q9NZU5	P07948	Q86WQ0	A0A087X253
Q9Y490	P18085	P62241	Q99729-3
P39060	P34897	Q08AG7	Q9Y2V2
Q86V21	P78537	Q96Q89-4	Q96JB2
Q5T7N3	Q5VYS8	Q9H0Z9	Q12774
Q9Y3U8	H7BXY5	P51148	K7EM91
Q9NX08	F6WH68	Q8TAT6	Q15814
P04626	O75376	Q9Y5P6	Q9H2J4
Q99460	Q9H1A3	O60361	O43426
Q3MIR4	Q9NZU5	Q9BRT6	Q9BX40-2
O75182-2	Q9Y490	P51397	Q63ZY3
H0YNG3	P39060	A0A140T901	Q5SXM2
Q96GM8	Q86V21	Q8IVJ1	L0R819
Q7Z7M0	A6NED2	O60763	Q96FK6
P52292	Q5T7N3	Q9UII4	Q9BYX2
Q99640	Q9Y3U8	Q9UHY1	Q9UKD2
P42771	C9JY28	Q86U86	Q70UQ0
Q9Y2S6	Q9NX08	Q15121	Q9NP58
P61106	P04626	Q13425	P68402
Q86VN1	Q99460	Q14106	Q9Y6W5
Q9NRF9	Q53GT1	O75937	Q01970
P21333	C9JD37	P23229-6	Q92688
P15289	O75182-2	Q9Y5S9	Q16512
P60520	H0YNG3	O00422	Q9Y3D8
Q9Y6M9	Q96GM8	Q15020	Q9BUT1
P20337	Q7Z7M0	Q92922	E7EPT4
P62917	P52292	O14545	P05204
P00403	Q99640	Q7KZI7	F5H442
Q9NVR5	Q9HCJ0	J3KRC4	Q9NVA4
Q4ZIN3	P42771	Q8IZP0-9	P10606
P50402	Q9Y2S6	Q8TF72	P19447
P49419-2	P61106	Q6P4E1-4	Q96EP5
Q9H081	Q86VN1	Q9BRK4	P09496-2
P52948	Q9NRF9	Q9H9F9	Q9UKY7
Q86WQ0	P21333	Q8IVT2	Q9Y450
P62241	P15289	Q96CW1	P23919
Q5SXM8	P60520	Q5QP56	O15037
P51148	Q9Y6M9	Q08257	Q9HBL8
Q8TAT6	P20337	O43488	Q96BP3
Q9Y5P6	P62917	O15551	Q9H501
O75582	Q9NR19	P14927	Q16637
Q9BRT6	Q96B49	Q9Y3E0	Q15800
P51397	P00403	Q8IZL8	O14773
O60763	Q9NVR5	A0A1B0GUS4	Q9Y2P8
Q9UII4	P50402	Q13595	Q8IY37
Q9UHY1	P49419-2	P43034	P27635
Q53S33	Q9H081	Q14318	Q8TDN6
Q15121	P52948	Q9BXH1	Q7Z460
Q13425	Q86WQ0	Q9Y4F5	B1AKJ5
O75937	P62241	Q9NS69	Q9Y639
Q92934	Q08AG7	Q15386	Q8NC60
P23229-6	Q96Q89-4	Q9C0E2	E9PEX6
Q9Y5S9	P51148	Q9UMZ2	O43237
O00422	Q8TAT6	Q9GZP4	P61163
Q15020	Q9Y5P6	O75330	P09234
Q86U70	O75582	Q13443	O75351
Q92922	Q9BRT6	F5GWN5	Q9H7L9
O14545	P51397	P25205	Q9H8W4
Q7KZI7	O60763	P34949	Q9UBC2-3
Q8IZP0-9	Q9UII4	Q9Y619	E7EVC7
Q8TF72	Q9UHY1	Q9HAW4	Q9Y696
Q8NA61	Q15121	Q92878	I3L161
Q6P4E1-4	Q13425	Q16537	O60443
O15440	Q14106	Q15813	O15357
Q9BRK4	O75937	A0A1W2PRL5	Q13751
Q8IVT2	Q92934	Q9H3H3	Q8TER5
Q96CW1	P23229-6	Q9Y6Q5	O60831
Q5QP56	Q9Y5S9	Q7Z6K5-2	P51948
Q08257	O00422	E7EWW0	P21266
O43488	Q15020	Q86UY6	P28066
O15551	Q92922	P32322	Q8NHH9
P14927	Q7KZI7	P11766	Q6VY07
Q8IZL8	J3KRC4	P20591	Q6ZVF9
A0A1B0GUS4	Q8IZP0-9	Q9UJ41	O15305
Q13595	Q8TF72	Q13371	O14657
O75164	Q6P4E1-4	B8ZZ31	Q96P47
P43034	Q9BRK4	Q6NXG1	O95298
Q14318	Q9H9F9	S4R386	O00459
Q9Y4F5	Q8IVT2	O95757	Q53GQ0
Q9NYP7	Q96CW1	J3KN16	Q96I24
Q9NS69	Q5QP56	P32321	Q9NWU2
Q15386	Q08257	Q5T4K3	P51812
Q9UMZ2	O43488	Q7L2E3-2	Q9NPI6
Q9GZP4	O15551	P16949	E9PHI4
O75330	P14927	O75175	Q9BYD6
Q13443	Q9Y3E0	Q13625	G5EA09
F5GWN5	Q8IZL8	Q96ND0	Q9NRA8
P25205	A0A1B0GUS4	F6SS63	R4GMU8
Q9BYX4	Q13595	P62304	Q8TCE6
P34949	O75164	P33992	C9JQD4
Q9HAW4	P43034	G3V1L9	Q8IYS1
Q92878	Q14318	A8MZB2	Q8NBK3
Q16537	Q9BXH1	Q15370	Q8N3F8
Q15813	Q9Y4F5	A0A1W2PQ51	Q8N6T3
A0A1W2PRL5	Q9NYP7	P16278	P22102
Q9H3H3	Q9NS69	H0YHA7	Q9HCE1
Q9Y6Q5	Q15386	O14578-4	P54652
P18433	Q9C0E2	P04049	Q9BTT0
K7EMM8	Q9UMZ2	Q14289	A0A087WWP4
Q7Z6K5-2	Q9GZP4	A0A0U1RRL5	Q6PJG6
E7EWW0	O75330	Q5TD07	O75170
Q86UY6	Q13443	Q969F9	Q9Y6M4
I3L419	F5GWN5	H7BXH2	O60306
P32322	P25205	Q92547	Q99570
P11766	Q9BYX4	P29317	Q96N67
P20591	P34949	Q9UMR2	P26358-2
Q9UJ41	Q9Y619	Q9Y446	Q9Y315
Q13371	Q9HAW4	Q53QV2	Q93073
Q6NXG1	Q92878	P62312	P29372
S4R386	Q16537	I3L3Z2	Q13190
O95757	Q9NPR9	E9PR17	B3KTM8
Q92738-2	Q15813	K7EJE1	P20700
J3KN16	A0A1W2PRL5	P51452	O14579
P32321	Q9Y6Q5	P13645	E9PL57
Q7L2E3-2	P18433	Q13541	P62136
P16949	Q7Z6K5-2	Q13057	A0A0A0MSH9
O75175	E7EWW0	Q15036	Q15022
Q13625	Q86UY6	Q15904	O00148
Q96ND0	P32322	P26006	A0A087WZG4
F6SS63	P11766	J3KNN3	Q9GZS3
P62304	P20591	Q96L50	P48730-2
P33992	Q9UJ41	cRAP112	P51571
G3V1L9	Q13371	Q9BSV6	Q9UHB9
A8MZB2	Q6NXG1	O75477	P62841
Q15370	O95757	Q9BTV4	Q2TBE0
A0A1W2PQ51	Q92738-2	Q96H35	D3YTB1
P16278	J3KN16	Q8IUR7	P54709
H0YHA7	P32321	Q04724	Q96FQ6
O14578-4	Q7L2E3-2	J3QRV5	Q9UBK7-2
P04049	P16949	Q6NUQ1	O15294
Q14289	O75175	D6RAR4	Q8IZ81
A0A0U1RRL5	Q13625	A0A087WT44	P17655
Q5TD07	Q96ND0	Q9BUP3-3	Q9BVJ6
Q969F9	F6SS63	Q709F0	F8W031
H7BXH2	P62304	P42566	Q01650
Q92547	P33992	Q96GK7	Q9Y678
P29317	G3V1L9	Q9UBL3	O14950
Q96SI1	A8MZB2	Q5VWQ8	O75190
Q9Y446	Q15370	O60906	P08651
Q53QV2	A0A1W2PQ51	P24821-4	Q96NB3
P62312	P16278	Q9BV20	Q8IXI1
E7EX48	O75298	Q13618	A0A087WUC6
P59190	H0YHA7	O95816	Q12962
I3L3Z2	O14578-4	Q969G3	Q15059
K7EJE1	P04049	Q8TDX7	Q9UP83
P51452	I3L0I7	M0QWZ7	A0A0C4DFM7
P13645	Q14289	P61006	Q9Y4G2
Q13541	Q969F9	Q14690	A0A0A0MRY0
Q13057	Q92543	Q8TE73	P62829
Q15036	B5MD00	Q9Y6E0	P47985
Q8WUN7	H7BXH2	J3KRC8	O15431
Q15904	Q92547	P18077	Q15311
P26006	P29317	O60716-3	Q96P48-1
I3L3L5	Q9UMR2	Q9BZI7	J3KMZ8
cRAP112	Q9H093	Q9ULW3	H7BYZ9
Q9BSV6	Q9Y446	Q8TDB6	H3BPE1
O75477	P62312	P55327	Q96S97
Q9BTV4	P59190	O43314	Q96AE7
Q96H35	I3L3Z2	Q6T4R5	Q8IZD4
Q8IUR7	E9PR17	Q2PPJ7	Q9BVQ7
Q04724	C9JAZ1	Q9BUR4	O75380
J3QRV5	K7EJE1	P50443	J3QLJ5
Q6NUQ1	P51452	A7KAX9	Q15024
D6RAR4	P13645	P51665	Q9Y3I0
A0A087WT44	Q13541	P09493-10	Q5VWV2
Q9BUP3-3	Q13057	O15371	Q9P2J5
Q709F0	Q15036	Q9NRL2	Q9NZL4
P42566	Q15904	A0A1B0GTL5	O00232
Q96GK7	P26006	O75044	G5E9E7
Q15011	J3KNN3	P53816	P61024
Q9UBL3	I3L3L5	H0YGS7	Q92876
Q5VWQ8	Q96L50	E7EN19	P49321
P24821-4	cRAP112	O94903	Q14533
Q9BV20	Q9BSV6	Q8N122	P04844
Q13618	O75477	Q93074	P45983-2
O95816	Q9BTV4	P04264	Q16595
Q969G3	Q96H35	Q96EY5	Q6P1J9
Q8TDX7	Q8IUR7	P36578	P62330
M0QWZ7	Q04724	A0A0G2JJD3	P23258
P61006	J3QRV5	E7EN73	Q9Y295
Q14690	Q6NUQ1	P17987	Q14677
G3V3U8	D6RAR4	Q7Z3B4	O43572
Q9Y6J9	A0A087WT44	Q9Y6K9	Q8NB90
Q9Y6E0	Q9BUP3-3	Q9HB40	O43252
A0A0A0MSQ6	Q709F0	P0CG08	P07237
P18077	P42566	Q9BVI4	Q68DQ2
O60716-3	Q96GK7	O43427	Q03468
Q9NXE8	Q9UBL3	P05386	J3KR51
Q9BZI7	P24821-4	J3KRW7	P23743
Q9ULW3	Q9BV20	Q8WXD5	Q9UPU9
Q8TDB6	Q13618	P54886	P14550
P55327	O95816	Q8TCS8	Q8N1G2
O43314	Q969G3	Q9UI12	P14373
Q6T4R5	Q8TDX7	P35249	P49959
Q8WUD6	M0QWZ7	Q9UBQ5	Q96KM6
Q9BUR4	P61006	Q86SK9	O75475
P50443	Q14690	F8W7U3	Q9Y3C1
A7KAX9	G3V3U8	Q7Z4R8	O00401
P51665	Q9Y6J9	Q86UU1	Q96RN5
P09493-10	Q9Y6E0	C9J384	Q8WVX3
O15371	A0A0A0MSQ6	Q9BY32	P82673
A0A1B0GTL5	P18077	Q5BKZ1	Q99623
O75044	O60716-3	Q9UPQ0	E9PK25
E7EN19	Q9BZI7	Q99538	Q9UHV9
[truncated: 4,060 more rows]

## Sheet: Summary
DMSO					VX-809
N° of identified proteins					N° of identified proteins
Rep1	Rep2	Rep3	Avg	SD	Rep1	Rep2	Rep3	Avg	SD
5785	6121	5941	5949	168.143	5975	6059	5940	5991.33	61.1583
N° of proteins in common in all three replicates					N° of proteins in common in all three replicates
4842					4882
