# Supplementary material for: CFTR Rescue by Lumacaftor (VX-809) Induces an Extensive Reorganization of Mitochondria in the Cystic Fibrosis Bronchial Epithelium
Source: Cells. 2022 Jun 16;11(12):1938. doi: 10.3390/cells11121938 (PMC9222197; doi:10.3390/cells11121938)
Supplement: Supplementary file 1 [file cells-11-01938-s001.zip › Supplementary File_2a.xlsx]

## Sheet: MARKERS LIST
Uniprot accession number	Organelle
Q04446	CYTOSOL
P17174	CYTOSOL
P26639	CYTOSOL
P54687	CYTOSOL
P49588	CYTOSOL
P54577	CYTOSOL
P40925	CYTOSOL
P34896	CYTOSOL
Q9HAB8	CYTOSOL
P13798	CYTOSOL
Q13630	CYTOSOL
Q9NR45	CYTOSOL
P21399	CYTOSOL
Q9Y617	CYTOSOL
O43765	CYTOSOL
Q14790	CYTOSOL
O95394	CYTOSOL
O43175	CYTOSOL
Q04760	CYTOSOL
Q9NT62	CYTOSOL
P34949	CYTOSOL
P11766	CYTOSOL
P52888	CYTOSOL
P22102	CYTOSOL
P49902	CYTOSOL
P13489	CYTOSOL
P31153	CYTOSOL
O75663	CYTOSOL
P00558	CYTOSOL
Q14376	CYTOSOL
P34932	CYTOSOL
Q15102	CYTOSOL
P07195	CYTOSOL
P00492	CYTOSOL
P19623	CYTOSOL
Q9H773	CYTOSOL
A6NDG6	CYTOSOL
P12277	CYTOSOL
Q9BRA2	CYTOSOL
P07741	CYTOSOL
P36871	CYTOSOL
P00338	CYTOSOL
P51570	CYTOSOL
P16152	CYTOSOL
P15374	CYTOSOL
A0AVT1	CYTOSOL
P49593	CYTOSOL
Q9NRX4	CYTOSOL
P48637	CYTOSOL
P30740	CYTOSOL
Q96KP4	CYTOSOL
P37837	CYTOSOL
Q9UPN7	CYTOSOL
Q16543	CYTOSOL
P52788	CYTOSOL
P53602	CYTOSOL
P32119	CYTOSOL
O95336	CYTOSOL
Q6Y288	ER
Q15738	ER
O95881	ER
Q53EP0	ER
Q96S66	ER
P14625	ER
Q9P035	ER
Q14554	ER
Q96DZ1	ER
O95292	ER
P18031	ER
P13667	ER
Q8NBM4	ER
Q7Z4H8	ER
Q8NHP6	ER
Q9H3N1	ER
Q8NBL1	ER
Q9Y5M8	ER
Q13217	ER
P39656	ER
O95470	ER
P30040	ER
Q9P0L0	ER
Q9Y4P3	ER
Q8TCJ2	ER
Q9Y4L1	ER
P39060	ER
O75477	ER
P0CG08	ER
Q86UE4	ER
P16435	ER
Q96AG4	ER
Q5JRA6	ER
P61009	ER
Q53GQ0	ER
P07237	ER
Q96A33	ER
P08240	ER
Q9P2E9	ER
Q14257	ER
Q99442	ER
Q6P1M0	ER
Q96A57	ER
P30533	ER
Q12797	ER
Q9Y2H6	ER
P26885	ER
Q7Z2K6	ER
Q8TC12	ER
P43307	ER
Q9P0I2	ER
O00400	ER
P48449	ER
Q8N5M9	ER
Q9NZ08	ER
Q96S52	ER
Q8NBS9	ER
O00264	ER
Q92604	ER
P07099	ER
Q9UGP8	ER
Q13724	ER
Q9H488	ER
O94905	ER
P16615	ER
Q96KA5	ER
P30101	ER
P51572	ER
P27824	ER
Q8NBJ7	ER
P04843	ER
Q9HCU5	ER
Q9BZQ6	ER
Q9BQE4	ER
Q969V3	ER
O15269	ER
Q9BS26	ER
Q99715	ER
Q9UBM7	ER
P00387	ER
P23284	ER
O15270	ER
P50454	ER
Q9BT09	ER
O75915	ER
Q9NZ01	ER
Q96KC8	ER
P04035	ER
Q14BN4	ER
Q15293	ER
P35610	ER
Q86UP2	ER
Q13586	ER
Q96JJ7	ER
Q92903	ER
Q9UNW1	ER
P26572	GOLGI
O60476	GOLGI
Q10471	GOLGI
Q8NCH0	GOLGI
Q14789	GOLGI
Q8NBN3	GOLGI
Q9HBR0	GOLGI
Q16706	GOLGI
Q7LGA3	GOLGI
Q9NYM9	GOLGI
Q8TBA6	GOLGI
Q08379	GOLGI
Q8NBZ7	GOLGI
O00461	GOLGI
Q92896-2	GOLGI
Q8IUH4	GOLGI
Q9UHL4	LYSOSOME
P34059	LYSOSOME
P04066	LYSOSOME
Q92820	LYSOSOME
P10253	LYSOSOME
P07858	LYSOSOME
P15586	LYSOSOME
P11279	LYSOSOME
O00115	LYSOSOME
P06280	LYSOSOME
O14773	LYSOSOME
P10619	LYSOSOME
P42785	LYSOSOME
P54802	LYSOSOME
P07686	LYSOSOME
O00754	LYSOSOME
P17900	LYSOSOME
P08559	MITOCHONDRIA
Q16698	MITOCHONDRIA
O00330	MITOCHONDRIA
Q13423	MITOCHONDRIA
Q16836	MITOCHONDRIA
P24539	MITOCHONDRIA
P43304	MITOCHONDRIA
P23786	MITOCHONDRIA
P23368	MITOCHONDRIA
P21912	MITOCHONDRIA
Q5JTZ9	MITOCHONDRIA
Q9P0J1	MITOCHONDRIA
Q5JPH6	MITOCHONDRIA
P28331	MITOCHONDRIA
O43181	MITOCHONDRIA
P26440	MITOCHONDRIA
Q04837	MITOCHONDRIA
P27144	MITOCHONDRIA
P11498	MITOCHONDRIA
P36957	MITOCHONDRIA
O75390	MITOCHONDRIA
P11182	MITOCHONDRIA
P54819	MITOCHONDRIA
P18859	MITOCHONDRIA
P42126	MITOCHONDRIA
P34897	MITOCHONDRIA
P32322	MITOCHONDRIA
P49411	MITOCHONDRIA
P00367	MITOCHONDRIA
P42765	MITOCHONDRIA
P45954	MITOCHONDRIA
P10606	MITOCHONDRIA
P47985	MITOCHONDRIA
Q16595	MITOCHONDRIA
O43674	MITOCHONDRIA
P40926	MITOCHONDRIA
O95299	MITOCHONDRIA
Q12931	MITOCHONDRIA
P61604	MITOCHONDRIA
O75947	MITOCHONDRIA
O43837	MITOCHONDRIA
P46199	MITOCHONDRIA
P30048	MITOCHONDRIA
P22830	MITOCHONDRIA
O75306	MITOCHONDRIA
O75489	MITOCHONDRIA
P53007	MITOCHONDRIA
P31040	MITOCHONDRIA
P40939	MITOCHONDRIA
P22695	MITOCHONDRIA
Q00059	MITOCHONDRIA
Q6NVY1	MITOCHONDRIA
P13073	MITOCHONDRIA
P24752	MITOCHONDRIA
P25705	MITOCHONDRIA
P06576	MITOCHONDRIA
P31937	MITOCHONDRIA
P22033	MITOCHONDRIA
P13804	MITOCHONDRIA
O76031	MITOCHONDRIA
P10515	MITOCHONDRIA
P48735	MITOCHONDRIA
P43897	MITOCHONDRIA
P55809	MITOCHONDRIA
P36542	MITOCHONDRIA
P11177	MITOCHONDRIA
Q16740	MITOCHONDRIA
P31930	MITOCHONDRIA
P83111	MITOCHONDRIA
Q9H845	MITOCHONDRIA
Q16822	MITOCHONDRIA
P04179	MITOCHONDRIA
P36551	MITOCHONDRIA
P00505	MITOCHONDRIA
Q5JRX3	MITOCHONDRIA
Q16795	MITOCHONDRIA
O60313-2	MITOCHONDRIA
P13995	MITOCHONDRIA
P30049	MITOCHONDRIA
Q9NUJ1	MITOCHONDRIA
P04181	MITOCHONDRIA
Q00325	MITOCHONDRIA
P50213	MITOCHONDRIA
P30837	MITOCHONDRIA
P30084	MITOCHONDRIA
O43615	MITOCHONDRIA
P00403	MITOCHONDRIA
O95202	MITOCHONDRIA
O43678	MITOCHONDRIA
Q10713	MITOCHONDRIA
Q9Y5J7	MITOCHONDRIA
O94826	MITOCHONDRIA
Q6NUK1	MITOCHONDRIA
Q9Y5L4	MITOCHONDRIA
P09669	MITOCHONDRIA
Q3ZCQ8	MITOCHONDRIA
Q02978	MITOCHONDRIA
O75439	MITOCHONDRIA
O15091	MITOCHONDRIA
O96008	MITOCHONDRIA
Q3SY69	MITOCHONDRIA
Q9H7N4	NUCLEUS
O95104	NUCLEUS
Q96FV9	NUCLEUS
Q8TED0	NUCLEUS
Q12996	NUCLEUS
Q9NVI1	NUCLEUS
Q92733	NUCLEUS
P27695	NUCLEUS
Q5VTR2	NUCLEUS
O15226	NUCLEUS
Q9UJX4	NUCLEUS
P51991	NUCLEUS
Q9NR30	NUCLEUS
Q9BZD4	NUCLEUS
Q9BZE4	NUCLEUS
Q9H0A0	NUCLEUS
Q9NW64	NUCLEUS
P24941	NUCLEUS
Q9Y2X3	NUCLEUS
O15381	NUCLEUS
Q99848	NUCLEUS
Q9NVP1	NUCLEUS
Q9NX58	NUCLEUS
Q9NY93	NUCLEUS
Q9BSC4	NUCLEUS
Q9UPN6	NUCLEUS
Q13151	NUCLEUS
O75818	NUCLEUS
Q14137	NUCLEUS
Q9GZR7	NUCLEUS
Q7RTV0	NUCLEUS
O75150	NUCLEUS
Q9H0S4	NUCLEUS
O43390	NUCLEUS
P52756	NUCLEUS
O43818	NUCLEUS
O75937	NUCLEUS
Q14690	NUCLEUS
P35249	NUCLEUS
P42285	NUCLEUS
O60563	NUCLEUS
Q99729-3	NUCLEUS
Q9UKD2	NUCLEUS
Q9Y2P8	NUCLEUS
Q8IY37	NUCLEUS
O60306	NUCLEUS
Q9BVJ6	NUCLEUS
Q96NB3	NUCLEUS
Q8N9T8	NUCLEUS
Q8WTT2	NUCLEUS
Q9H8H0	NUCLEUS
Q13523	NUCLEUS
Q8TDD1	NUCLEUS
Q9NY61	NUCLEUS
Q10570	NUCLEUS
Q5QJE6	NUCLEUS
Q8IWA0	NUCLEUS
P31943	NUCLEUS
Q8IY81	NUCLEUS
Q9ULR0	NUCLEUS
O95478	NUCLEUS
Q8NAV1	NUCLEUS
Q8NI27	NUCLEUS
Q00839	NUCLEUS
Q13823	NUCLEUS
Q5SY16	NUCLEUS
Q9UL40	NUCLEUS
P35637	NUCLEUS
Q12874	NUCLEUS
Q13573	NUCLEUS
Q8N9R8	NUCLEUS
Q9BRD0	NUCLEUS
Q6UN15	NUCLEUS
Q9UMY1	NUCLEUS
Q9NYH9	NUCLEUS
Q8IXT5	NUCLEUS
O95232	NUCLEUS
Q9BQ39	NUCLEUS
Q9NZM5	NUCLEUS
Q92804	NUCLEUS
O43395	NUCLEUS
Q969X6	NUCLEUS
Q9Y3T9	NUCLEUS
Q14103	NUCLEUS
O14979	NUCLEUS
P78316	NUCLEUS
Q6P2Q9	NUCLEUS
O00567	NUCLEUS
Q9Y314	NUCLEUS
P09661	NUCLEUS
O95602	NUCLEUS
Q96KR1	NUCLEUS
Q9NXV6	NUCLEUS
Q05048	NUCLEUS
Q99575	NUCLEUS
O75643	NUCLEUS
O15446	NUCLEUS
P46063	NUCLEUS
P40937	NUCLEUS
Q08211	NUCLEUS
P55795	NUCLEUS
Q15428	NUCLEUS
Q29RF7	NUCLEUS
P22087	NUCLEUS
O14776	NUCLEUS
P62995	NUCLEUS
Q13148	NUCLEUS
P18754	NUCLEUS-CHROMATIN
P07305	NUCLEUS-CHROMATIN
P84243	NUCLEUS-CHROMATIN
P11388	NUCLEUS-CHROMATIN
Q14683	NUCLEUS-CHROMATIN
O60264	NUCLEUS-CHROMATIN
O15347	NUCLEUS-CHROMATIN
Q16778	NUCLEUS-CHROMATIN
P26583	NUCLEUS-CHROMATIN
Q8WXI9	NUCLEUS-CHROMATIN
Q5QNW6	NUCLEUS-CHROMATIN
Q9H2P0	NUCLEUS-CHROMATIN
P43246	NUCLEUS-CHROMATIN
P16401	NUCLEUS-CHROMATIN
Q15059	NUCLEUS-CHROMATIN
O75475	NUCLEUS-CHROMATIN
Q9UIG0	NUCLEUS-CHROMATIN
P46013	NUCLEUS-CHROMATIN
P17096	NUCLEUS-CHROMATIN
Q5UIP0	NUCLEUS-CHROMATIN
O60216	NUCLEUS-CHROMATIN
P62805	NUCLEUS-CHROMATIN
O94776	NUCLEUS-CHROMATIN
O75367	NUCLEUS-CHROMATIN
A6NHR9	NUCLEUS-CHROMATIN
P10412	NUCLEUS-CHROMATIN
Q8N3U4	NUCLEUS-CHROMATIN
O14497	NUCLEUS-CHROMATIN
P52701	NUCLEUS-CHROMATIN
O95239	NUCLEUS-CHROMATIN
Q5SSJ5	NUCLEUS-CHROMATIN
Q9UQE7	NUCLEUS-CHROMATIN
O00116	PEROXISOME
Q9NUI1	PEROXISOME
P09110	PEROXISOME
O75381	PEROXISOME
P28288	PEROXISOME
Q9UJ83	PEROXISOME
O43808	PEROXISOME
P51659	PEROXISOME
P56589	PEROXISOME
Q15067-2	PEROXISOME
Q8WVX9	PEROXISOME
Q9BTZ2	PEROXISOME
P22307	PEROXISOME
O15228	PEROXISOME
P04040	PEROXISOME
P11166	PM
P05026	PM
Q7Z2K8	PM
Q13740-2	PM
P17301	PM
O00161	PM
P19022	PM
P50895	PM
Q92692	PM
P35221	PM
Q9Y639	PM
Q01650	PM
P54760	PM
P05023	PM
Q9UIW2	PM
P30825	PM
P30530	PM
P84095	PM
P05362	PM
P21589	PM
P35222	PM
Q08722	PM
P23634	PM
P08754	PM
Q9Y666	PM
O15031	PM
P53985	PM
P05556	PM
P10586	PM
P20020	PM
P40306	PROTEASOME
P48556	PROTEASOME
P28074	PROTEASOME
P35998	PROTEASOME
P49720	PROTEASOME
P25787	PROTEASOME
Q13200	PROTEASOME
Q99436	PROTEASOME
P25786	PROTEASOME
P55036	PROTEASOME
P20618	PROTEASOME
Q99460	PROTEASOME
P28066	PROTEASOME
O00232	PROTEASOME
P49721	PROTEASOME
O00231	PROTEASOME
P60900	PROTEASOME
P28070	PROTEASOME
O43242	PROTEASOME
Q9UNM6	PROTEASOME
O00487	PROTEASOME
P43686	PROTEASOME
P28062	PROTEASOME
Q15008	PROTEASOME
P62195	PROTEASOME
O14818	PROTEASOME
P62191	PROTEASOME
Q06323	PROTEASOME
P25789	PROTEASOME
P62701	RIBOSOME
P39023	RIBOSOME
P26373	RIBOSOME
P05388	RIBOSOME
P08865	RIBOSOME
P50914	RIBOSOME
P63220	RIBOSOME
P39019	RIBOSOME
P62906	RIBOSOME
P46783	RIBOSOME
Q02878	RIBOSOME
P42766	RIBOSOME
Q9Y3U8	RIBOSOME
P62917	RIBOSOME
P62241	RIBOSOME
P36578	RIBOSOME
P05386	RIBOSOME
P62269	RIBOSOME
P27635	RIBOSOME
P62841	RIBOSOME
P62829	RIBOSOME
P84098	RIBOSOME
P62280	RIBOSOME
P42677	RIBOSOME
P40429	RIBOSOME
P62899	RIBOSOME
P32969	RIBOSOME
P46779	RIBOSOME
P62081	RIBOSOME
P23396	RIBOSOME
P61353	RIBOSOME
P62424	RIBOSOME
P62888	RIBOSOME
P46778	RIBOSOME
P46777	RIBOSOME
P62263	RIBOSOME
P83731	RIBOSOME
P62854	RIBOSOME
P15880	RIBOSOME
P61247	RIBOSOME
P61254	RIBOSOME
P18124	RIBOSOME
P62244	RIBOSOME
P05387	RIBOSOME
P62249	RIBOSOME
P62857	RIBOSOME
P46776	RIBOSOME
