# Supplementary material for: CFTR Rescue by Lumacaftor (VX-809) Induces an Extensive Reorganization of Mitochondria in the Cystic Fibrosis Bronchial Epithelium
Source: Cells. 2022 Jun 16;11(12):1938. doi: 10.3390/cells11121938 (PMC9222197; doi:10.3390/cells11121938)
Supplement: Supplementary file 1 [file cells-11-01938-s001.zip › Supplementary File_2b.xlsx]

## Sheet: LOPIT-DC Data_DMSO
UniProt accession for protein group	Normalised TMT 10-plex reporter ion distribution (Replicate 1)										Normalised TMT 10-plex reporter ion distribution (Replicate 2)										Normalised TMT 10-plex reporter ion distribution (Replicate 3)										UniProt accession for protein group	UniProt protein description	SVM classification of protein localisation
	126_P1rep1	127N_P2rep1	127C_P3rep1	129N_P4rep1	128C_P5rep1	128N_P6rep1	129C_P7rep1	130N_P8rep1	130C_P9rep1	131_SNrep1	126_P1rep2	127N_P2rep2	127C_P3rep2	129N_P4rep2	128C_P5rep2	128N_P6rep2	129C_P7rep2	130N_P8rep2	130C_P9rep2	131_SNrep2	126_P1rep3	127N_P2rep3	127C_P3rep3	129N_P4rep3	128C_P5rep3	128N_P6rep3	129C_P7rep3	130N_P8rep3	130C_P9rep3	131_SNrep3			Subcellular markers	SVM classification	SVM score	Curated SVM predictions
J3KPS0	0.0362023	0.217874	0.140433	0.276821	0.174035	0.0980392	0.0345924	0.00895769	0.00544892	0.00759546	0.0585244	0.106776	0.147919	0.201256	0.249715	0.109111	0.0887206	0.0183667	0.00617412	0.0134378	0.0628395	0.100768	0.164638	0.175595	0.197883	0.159861	0.0842854	0.0271586	0.0107698	0.0162015	J3KPS0	DnaJ (Hsp40) homolog subfamily B member 12 isoform CRA_c OS=Homo sapiens OX=9606 GN=DNAJB12 PE=1 SV=1	unknown	ER	0.939379	ER
Q13011	0.186582	0.468594	0.10388	0.120369	0.0629154	0.0248364	0.0122121	0.00628639	0.00453445	0.00979028	0.19915	0.363599	0.14198	0.11081	0.0762105	0.0384379	0.0230832	0.02078	0.0122838	0.0136657	0.226559	0.291197	0.146424	0.104168	0.0935505	0.0562451	0.0220963	0.0189397	0.0157113	0.0251094	Q13011	Delta(35)-Delta(24)-dienoyl-CoA isomerase mitochondrial OS=Homo sapiens OX=9606 GN=ECH1 PE=1 SV=2	unknown	MITOCHONDRIA	0.298382	unknown
Q9H553	0.0481299	0.177464	0.140774	0.274791	0.202478	0.0909845	0.0355047	0.0109656	0.00972082	0.00918736	0.0566246	0.112174	0.162432	0.213534	0.203767	0.132114	0.0901692	0.0136329	0.00656939	0.00898204	0.0652155	0.117683	0.143179	0.184806	0.195213	0.160003	0.0783106	0.0259301	0.0127482	0.0169109	Q9H553	Alpha-1,6-mannosyltransferase ALG2 OS=Homo sapiens OX=9606 GN=ALG2 PE=1 SV=1	unknown	ER	0.950423	ER
Q5T4U5	0.265338	0.595808	0.0839305	0.0243448	0.00588986	0.00314126	0.0022087	0.00476097	0.00741141	0.007166	0.306952	0.510963	0.114046	0.00834571	0.00905297	0.0091237	0.0107504	0.0121296	0.00792135	0.010715	0.321065	0.403482	0.105019	0.0309321	0.0275179	0.0262206	0.0163878	0.0199385	0.0146125	0.0348242	Q5T4U5	Acyl-Coenzyme A dehydrogenase C-4 to C-12 straight chain isoform CRA_a OS=Homo sapiens OX=9606 GN=ACADM PE=1 SV=1	unknown	MITOCHONDRIA	0.952776	MITOCHONDRIA
Q96EY8	0.226004	0.623653	0.0664092	0.0237206	0.0118815	0.0111177	0.00742595	0.00755325	0.0111177	0.0111177	0.276305	0.476477	0.11174	0.0274276	0.0218314	0.0109464	0.0167886	0.0241068	0.0129143	0.0214624	0.346475	0.405927	0.128784	0.022476	0.0234729	0.0125974	0.0114192	0.013685	0.011238	0.023926	Q96EY8	Cob(I)yrinic acid ac-diamide adenosyltransferase mitochondrial OS=Homo sapiens OX=9606 GN=MMAB PE=1 SV=1	unknown	MITOCHONDRIA	0.952864	MITOCHONDRIA
P08559	0.245718	0.590253	0.0737526	0.0131817	0.0108146	0.0105825	0.00793688	0.0193548	0.0207473	0.00765839	0.3035	0.500905	0.11552	0.0106383	0.00805597	0.0090271	0.0108149	0.0188488	0.0122495	0.0104397	0.36707	0.4149	0.107237	0.0137028	0.0167816	0.0102771	0.00624431	0.0248471	0.0235462	0.015394	P08559	Pyruvate dehydrogenase E1 component subunit alpha somatic form mitochondrial OS=Homo sapiens OX=9606 GN=PDHA1 PE=1 SV=3	MITOCHONDRIA	MITOCHONDRIA	1	MITOCHONDRIA
Q16698	0.277582	0.561805	0.0774033	0.0171786	0.0108361	0.0102595	0.0111343	0.0156874	0.0125261	0.00558704	0.245575	0.403753	0.113098	0.0451722	0.0363691	0.0350262	0.043904	0.0310536	0.0238544	0.0221945	0.355367	0.428256	0.105096	0.019196	0.01767	0.016425	0.0149392	0.0221276	0.0125296	0.00839324	Q16698	24-dienoyl-CoA reductase mitochondrial OS=Homo sapiens OX=9606 GN=DECR1 PE=1 SV=1	MITOCHONDRIA	MITOCHONDRIA	1	MITOCHONDRIA
O15357	0.0455735	0.0927637	0.0554273	0.0921478	0.091378	0.0733641	0.0719784	0.19746	0.189299	0.0906082	0.0555079	0.0644829	0.0667124	0.0656834	0.0825473	0.093809	0.122678	0.19242	0.147888	0.108272	0.0441386	0.0526534	0.055645	0.0593731	0.0888296	0.114006	0.084227	0.173977	0.155889	0.171262	O15357	Phosphatidylinositol 345-trisphosphate 5-phosphatase 2 OS=Homo sapiens OX=9606 GN=INPPL1 PE=1 SV=2	unknown	NUCLEUS	0.928673	NUCLEUS
Q07666	0.156361	0.154113	0.0391854	0.0809997	0.0894007	0.0832476	0.101821	0.164152	0.118109	0.012611	0.226046	0.0673334	0.0336509	0.0492954	0.0820904	0.0821379	0.154211	0.189906	0.102601	0.0127281	0.229791	0.102635	0.0348967	0.0452903	0.0701187	0.0806835	0.103937	0.219534	0.0775158	0.0355987	Q07666	KH domain-containing RNA-binding signal transduction-associated protein 1 OS=Homo sapiens OX=9606 GN=KHDRBS1 PE=1 SV=1	unknown	NUCLEUS	0.954731	NUCLEUS
P19388	0.0688819	0.0754998	0.0417579	0.0778301	0.0932097	0.0816983	0.0916717	0.199702	0.202778	0.0669712	0.0692432	0.0500599	0.0500129	0.0590293	0.080866	0.0878865	0.126652	0.224542	0.166851	0.0848576	0.065119	0.0491275	0.0400719	0.0492293	0.074395	0.103139	0.098272	0.217131	0.195594	0.107921	P19388	DNA-directed RNA polymerases I II and III subunit RPABC1 OS=Homo sapiens OX=9606 GN=POLR2E PE=1 SV=4	unknown	NUCLEUS	0.974189	NUCLEUS
Q5T1B5	0.129934	0.174808	0.0970814	0.166251	0.150359	0.112413	0.0757398	0.042836	0.0324454	0.0181327	0.140738	0.17747	0.125684	0.15219	0.125972	0.105373	0.1138	0.0333477	0.0173581	0.00806684	0.206893	0.211008	0.124383	0.114198	0.113477	0.0806584	0.0633745	0.0376543	0.0205761	0.0277778	Q5T1B5	Type I inositol 145-trisphosphate 5-phosphatase OS=Homo sapiens OX=9606 GN=INPP5A PE=1 SV=1	unknown	PM	0.876154	PM
A8MZB2	0.0326459	0.0813443	0.0624662	0.111104	0.13347	0.125654	0.176877	0.160765	0.097517	0.0181567	0.0348584	0.058191	0.0710521	0.0877082	0.134373	0.13606	0.217654	0.170145	0.0694357	0.0205215	0.0311795	0.0411142	0.0476482	0.0746628	0.126743	0.171296	0.18211	0.207099	0.0958313	0.0223148	A8MZB2	N-acetyltransferase 5 (ARD1 homolog S. cerevisiae) isoform CRA_a OS=Homo sapiens OX=9606 GN=NAA20 PE=1 SV=1	unknown	RIBOSOME	0.305331	unknown
B1AK88	0.0683094	0.114969	0.0697537	0.105817	0.110135	0.087778	0.0835777	0.115455	0.104785	0.139419	0.0727707	0.0908671	0.0932235	0.0898198	0.118913	0.101124	0.109456	0.109379	0.0788542	0.135592	0.0722526	0.0777652	0.0687943	0.0777998	0.102546	0.116396	0.0789526	0.129571	0.101332	0.17459	B1AK88	Capping protein (Actin filament) muscle Z-line beta isoform CRA_d OS=Homo sapiens OX=9606 GN=CAPZB PE=1 SV=1	unknown	CYTOSOL	0.457846	unknown
G5EA30	0.0714581	0.124628	0.0577623	0.126159	0.128062	0.122642	0.131082	0.154502	0.0755958	0.0081099	0.0869883	0.0572741	0.0512174	0.0781676	0.121621	0.113004	0.22117	0.177798	0.0754847	0.0172757	0.0897258	0.062456	0.0485418	0.0650057	0.10024	0.117991	0.157621	0.247104	0.0822952	0.0290182	G5EA30	CUG triplet repeat RNA binding protein 1 isoform CRA_c OS=Homo sapiens OX=9606 GN=CELF1 PE=1 SV=1	unknown	NUCLEUS	0.493424	unknown
G3XAL9	0.0919043	0.20368	0.135373	0.220515	0.163937	0.0825207	0.0543698	0.024057	0.0136155	0.0100276	0.0909644	0.140257	0.155418	0.186915	0.181767	0.108557	0.0857757	0.0291459	0.0130528	0.00814788	0.10744	0.128221	0.12739	0.123649	0.159393	0.108479	0.0856193	0.0683707	0.0444722	0.0469659	G3XAL9	Solute carrier family 12 (Sodium/potassium/chloride transporters) member 2 isoform CRA_a OS=Homo sapiens OX=9606 GN=SLC12A2 PE=1 SV=1	unknown	ER	0.493594	unknown
P62875	0.0972562	0.118718	0.0627547	0.0817713	0.0853029	0.0506656	0.0691388	0.131894	0.173187	0.129313	0.094105	0.0701136	0.0733752	0.0620362	0.0918723	0.0938423	0.105313	0.118709	0.122321	0.168312	0.0986104	0.0737065	0.0582639	0.0644513	0.0803578	0.105958	0.0709995	0.118848	0.133466	0.195339	P62875	DNA-directed RNA polymerases I II and III subunit RPABC5 OS=Homo sapiens OX=9606 GN=POLR2L PE=1 SV=1	unknown	NUCLEUS	0.497787	unknown
C9JLU1	0.0632341	0.0691065	0.0582005	0.0613465	0.0795931	0.0772861	0.0760277	0.127727	0.153628	0.233851	0.0729882	0.0524859	0.0748334	0.0607893	0.0649923	0.08857	0.0992312	0.130702	0.114505	0.240902	0.068833	0.0483588	0.05275	0.0500604	0.0698211	0.0986936	0.0570864	0.13569	0.141673	0.277034	C9JLU1	DNA-directed RNA polymerases I II and III subunit RPABC3 (Fragment) OS=Homo sapiens OX=9606 GN=POLR2H PE=1 SV=8	unknown	CYTOSOL	0.560314	unknown
Q14573	0.0829033	0.206096	0.120401	0.227761	0.171996	0.0958827	0.048149	0.0230032	0.0128468	0.0109604	0.0944008	0.119418	0.133515	0.17827	0.183843	0.127237	0.108666	0.0330934	0.0116095	0.009948	0.123713	0.143774	0.122203	0.139569	0.163947	0.137217	0.0831635	0.0487737	0.0210896	0.0165512	Q14573	Inositol 145-trisphosphate receptor type 3 OS=Homo sapiens OX=9606 GN=ITPR3 PE=1 SV=2	unknown	ER	0.64123	unknown
Q5T5C7	0.0267386	0.122844	0.0623902	0.111366	0.116405	0.0817403	0.0561314	0.0504645	0.0638428	0.308077	0.0458837	0.0839413	0.111484	0.0878122	0.130066	0.117284	0.111677	0.0912128	0.0676499	0.15299	0.0422976	0.0608148	0.0780087	0.0824536	0.106547	0.142996	0.073594	0.109073	0.0826051	0.22161	Q5T5C7	Serine--tRNA ligase cytoplasmic OS=Homo sapiens OX=9606 GN=SARS PE=1 SV=1	unknown	CYTOSOL	0.918633	CYTOSOL
P11216	0.0306746	0.0979696	0.0577554	0.0934876	0.107616	0.0802474	0.05741	0.0598442	0.0944498	0.320545	0.0378571	0.0632627	0.0911981	0.0717952	0.099341	0.104965	0.0990925	0.060298	0.0608571	0.311333	0.0280041	0.0429606	0.0502814	0.0611642	0.0776508	0.107559	0.0615529	0.118319	0.0923072	0.360201	P11216	Glycogen phosphorylase brain form OS=Homo sapiens OX=9606 GN=PYGB PE=1 SV=5	unknown	CYTOSOL	0.909053	CYTOSOL
Q9BV57	0.0277167	0.0695867	0.0692114	0.085509	0.113065	0.080416	0.0856699	0.0427277	0.058114	0.367984	0.0514306	0.0842862	0.108311	0.086925	0.139511	0.132681	0.111571	0.0723685	0.0602094	0.152705	0.0492256	0.0678669	0.0929581	0.107524	0.11486	0.16444	0.0765142	0.098593	0.0561718	0.171847	Q9BV57	12-dihydroxy-3-keto-5-methylthiopentene dioxygenase OS=Homo sapiens OX=9606 GN=ADI1 PE=1 SV=1	unknown	CYTOSOL	0.908927	CYTOSOL
F8W809	0.044792	0.107305	0.0710261	0.0906047	0.107223	0.0907885	0.0706994	0.0589809	0.0707199	0.287861	0.0431234	0.0636862	0.085046	0.0665554	0.118318	0.103409	0.0826656	0.0841109	0.0570126	0.296072	0.0420791	0.0542107	0.0711949	0.064526	0.0822588	0.11491	0.0587028	0.0853229	0.0635832	0.363212	F8W809	Thioredoxin reductase 1 cytoplasmic OS=Homo sapiens OX=9606 GN=TXNRD1 PE=1 SV=1	unknown	CYTOSOL	0.938586	CYTOSOL
P23381	0.0356709	0.114444	0.0785608	0.1129	0.116857	0.104638	0.0637945	0.0607254	0.064721	0.247689	0.0416954	0.0640355	0.0797975	0.0752514	0.115305	0.101414	0.0985214	0.078374	0.0653327	0.280273	0.0375944	0.0519122	0.0692791	0.070132	0.0927974	0.122271	0.0650449	0.096624	0.0804722	0.313873	P23381	Tryptophan--tRNA ligase cytoplasmic OS=Homo sapiens OX=9606 GN=WARS PE=1 SV=2	unknown	CYTOSOL	0.935433	CYTOSOL
Q01581	0.0321821	0.0865939	0.0827029	0.0822689	0.114745	0.0967942	0.0876015	0.0469709	0.0501953	0.319945	0.04816	0.0783217	0.110012	0.0925655	0.128533	0.129636	0.111619	0.0615039	0.0510436	0.188605	0.0411035	0.0651484	0.0821526	0.0852601	0.10698	0.155363	0.0715046	0.0932461	0.0549676	0.244274	Q01581	Hydroxymethylglutaryl-CoA synthase cytoplasmic OS=Homo sapiens OX=9606 GN=HMGCS1 PE=1 SV=2	unknown	CYTOSOL	0.930771	CYTOSOL
P49589-3	0.0381304	0.126378	0.0713804	0.111499	0.111499	0.0924791	0.0646105	0.0709697	0.0827596	0.230294	0.0554302	0.0820915	0.1041	0.0883038	0.121221	0.119501	0.102448	0.0800823	0.0793489	0.167474	0.0548562	0.0624229	0.0711231	0.0773203	0.0951561	0.127197	0.0712648	0.115238	0.103473	0.221949	P49589-3	Isoform 3 of Cysteine--tRNA ligase cytoplasmic OS=Homo sapiens OX=9606 GN=CARS	unknown	CYTOSOL	0.891258	CYTOSOL
Q9HB07	0.0456979	0.112133	0.0653043	0.0906417	0.101953	0.0747681	0.0665108	0.0382701	0.051052	0.353669	0.071018	0.10684	0.125903	0.0913333	0.143658	0.130854	0.110141	0.0706766	0.0552268	0.0943493	0.0612892	0.0855043	0.088644	0.087976	0.111523	0.162926	0.0752839	0.108517	0.0602204	0.158116	Q9HB07	UPF0160 protein MYG1 mitochondrial OS=Homo sapiens OX=9606 GN=C12orf10 PE=1 SV=2	unknown	CYTOSOL	0.887867	CYTOSOL
O95861	0.046538	0.10865	0.0674216	0.0868201	0.0994617	0.0833302	0.0651012	0.0357713	0.061834	0.345071	0.051833	0.0962728	0.101287	0.0742699	0.116508	0.113502	0.104775	0.0735467	0.0538421	0.214163	0.0662528	0.0929021	0.0987213	0.0876946	0.111675	0.160304	0.0804299	0.100222	0.0709229	0.130875	O95861	3'(2')5'-bisphosphate nucleotidase 1 OS=Homo sapiens OX=9606 GN=BPNT1 PE=1 SV=1	unknown	CYTOSOL	0.880014	CYTOSOL
Q9NQ88	0.0348395	0.115189	0.0596961	0.107388	0.107105	0.0833805	0.0605852	0.0423571	0.0565435	0.332916	0.0451747	0.0708854	0.103114	0.0743255	0.125385	0.104925	0.0959623	0.066721	0.0522361	0.261271	0.0359708	0.0650143	0.0686368	0.0801398	0.100604	0.137019	0.055545	0.0810296	0.0545281	0.321513	Q9NQ88	Fructose-26-bisphosphatase TIGAR OS=Homo sapiens OX=9606 GN=TIGAR PE=1 SV=1	unknown	CYTOSOL	0.933117	CYTOSOL
O95865	0.0406618	0.090293	0.0932828	0.0950767	0.120191	0.0735499	0.0793303	0.0442496	0.0330875	0.330277	0.0540239	0.0911548	0.113893	0.11663	0.158457	0.121055	0.107811	0.0505777	0.0421988	0.144199	0.0750229	0.0823422	0.0835621	0.0780726	0.123513	0.132662	0.0716682	0.0783776	0.053065	0.221714	O95865	N(G)N(G)-dimethylarginine dimethylaminohydrolase 2 OS=Homo sapiens OX=9606 GN=DDAH2 PE=1 SV=1	unknown	CYTOSOL	0.885958	CYTOSOL
Q04446	0.0320399	0.102495	0.0609405	0.102398	0.111848	0.0951487	0.0594841	0.0438526	0.0588045	0.332988	0.028074	0.0589151	0.0835879	0.0577045	0.103591	0.0962126	0.0788609	0.0507292	0.0461751	0.396149	0.0392243	0.0594976	0.0624063	0.0663729	0.0840018	0.11212	0.0601146	0.067078	0.042662	0.406523	Q04446	14-alpha-glucan-branching enzyme OS=Homo sapiens OX=9606 GN=GBE1 PE=1 SV=3	CYTOSOL	CYTOSOL	1	CYTOSOL
P17174	0.0346757	0.0832805	0.0720013	0.0820801	0.107085	0.0930649	0.083507	0.0432144	0.0502582	0.350833	0.0563052	0.0758656	0.110659	0.0956382	0.155295	0.120842	0.0975475	0.0563476	0.0468007	0.1847	0.0376813	0.062215	0.0741987	0.0798918	0.099676	0.143176	0.0557984	0.0811814	0.0545089	0.311672	P17174	Aspartate aminotransferase cytoplasmic OS=Homo sapiens OX=9606 GN=GOT1 PE=1 SV=3	CYTOSOL	CYTOSOL	1	CYTOSOL
Q9BWD1	0.0307591	0.0819144	0.0638251	0.0842579	0.0949504	0.079461	0.0778132	0.0420008	0.0864184	0.3586	0.048033	0.0717746	0.0979557	0.0880261	0.139632	0.123037	0.1106	0.0930424	0.0743515	0.153548	0.0458707	0.0639658	0.0783245	0.0750668	0.0989671	0.132749	0.0673779	0.100079	0.0748815	0.262718	Q9BWD1	Acetyl-CoA acetyltransferase cytosolic OS=Homo sapiens OX=9606 GN=ACAT2 PE=1 SV=2	unknown	CYTOSOL	0.91717	CYTOSOL
P33316	0.0360581	0.0910582	0.0815872	0.0869417	0.109227	0.0949581	0.0902225	0.0422792	0.0421245	0.325544	0.0569196	0.0850084	0.107161	0.0883476	0.113883	0.116742	0.111286	0.0405509	0.0488225	0.23128	0.0386527	0.0564954	0.0617365	0.0706	0.0990404	0.131219	0.0568808	0.071101	0.0409264	0.373348	P33316	Deoxyuridine 5'-triphosphate nucleotidohydrolase mitochondrial OS=Homo sapiens OX=9606 GN=DUT PE=1 SV=4	unknown	CYTOSOL	0.913257	CYTOSOL
P26639	0.0349298	0.108128	0.0664918	0.104456	0.11421	0.0858154	0.0559018	0.044962	0.0637819	0.321324	0.0476502	0.0692972	0.0945332	0.0768871	0.111326	0.1013	0.0956111	0.0675045	0.0568644	0.279026	0.0386781	0.058265	0.0648442	0.0785707	0.0916537	0.129755	0.0579317	0.0826892	0.0699308	0.327682	P26639	Threonine--tRNA ligase cytoplasmic OS=Homo sapiens OX=9606 GN=TARS PE=1 SV=3	CYTOSOL	CYTOSOL	1	CYTOSOL
O60547	0.0242925	0.104424	0.0698832	0.113956	0.114799	0.0960736	0.0655392	0.0604783	0.0779807	0.272574	0.0403394	0.0646584	0.0988881	0.0752333	0.121573	0.117032	0.106076	0.103658	0.0834341	0.189107	0.0378955	0.0605385	0.0785759	0.0791757	0.094321	0.149547	0.0626379	0.0845526	0.0667938	0.285962	O60547	GDP-mannose 46 dehydratase OS=Homo sapiens OX=9606 GN=GMDS PE=1 SV=1	unknown	CYTOSOL	0.930085	CYTOSOL
Q9BZ23	0.0409191	0.133628	0.0627486	0.0978347	0.111975	0.0927972	0.0655767	0.0587715	0.0735307	0.262218	0.0389984	0.0687489	0.0806142	0.0714535	0.114465	0.0935264	0.0971907	0.0964928	0.0751178	0.263392	0.0462841	0.0485419	0.0511759	0.0549389	0.0959548	0.116275	0.0613358	0.0895579	0.064158	0.371778	Q9BZ23	Pantothenate kinase 2 mitochondrial OS=Homo sapiens OX=9606 GN=PANK2 PE=1 SV=3	unknown	CYTOSOL	0.925651	CYTOSOL
O43776	0.0299468	0.112253	0.0663724	0.104795	0.113033	0.0885093	0.0585167	0.0638711	0.0786112	0.284093	0.0392047	0.0645864	0.0960669	0.0727208	0.106505	0.0960038	0.0945915	0.0915776	0.073565	0.265178	0.0338237	0.0524324	0.0648533	0.0746158	0.0892652	0.124803	0.0620309	0.102563	0.0922686	0.303344	O43776	Asparagine--tRNA ligase cytoplasmic OS=Homo sapiens OX=9606 GN=NARS PE=1 SV=1	unknown	CYTOSOL	0.932736	CYTOSOL
A0A087WY55	0.0456819	0.126542	0.0841947	0.106702	0.112121	0.0917806	0.0721907	0.0413471	0.0643548	0.255085	0.0472473	0.0830376	0.104228	0.0906756	0.133665	0.11849	0.0902362	0.0541755	0.0453885	0.232857	0.0564136	0.0686926	0.084215	0.0805081	0.0912426	0.123562	0.0613175	0.0660283	0.0549463	0.313074	A0A087WY55	Chromosome 6 open reading frame 55 isoform CRA_b OS=Homo sapiens OX=9606 GN=VTA1 PE=1 SV=1	unknown	CYTOSOL	0.921815	CYTOSOL
P12081	0.0489082	0.15984	0.0690814	0.0950222	0.107089	0.0903032	0.0528683	0.0569733	0.0678119	0.252103	0.0725031	0.114424	0.104438	0.0816062	0.125846	0.11568	0.109122	0.0786234	0.0658931	0.131864	0.0596219	0.0806063	0.0675817	0.0792049	0.0988739	0.142084	0.0662602	0.111026	0.0952106	0.19953	P12081	Histidine--tRNA ligase cytoplasmic OS=Homo sapiens OX=9606 GN=HARS PE=1 SV=2	unknown	CYTOSOL	0.872516	CYTOSOL
P54687	0.0309239	0.0762135	0.0664033	0.0759489	0.104983	0.0775934	0.0716203	0.0407153	0.0543815	0.401217	0.0493904	0.0819614	0.114562	0.0871229	0.145057	0.127288	0.119397	0.0705704	0.0542256	0.150426	0.0460802	0.0735073	0.082951	0.0982552	0.127156	0.182914	0.0738756	0.0986571	0.0578011	0.158802	P54687	Branched-chain-amino-acid aminotransferase cytosolic OS=Homo sapiens OX=9606 GN=BCAT1 PE=1 SV=3	CYTOSOL	CYTOSOL	1	CYTOSOL
P49588	0.0308599	0.0984954	0.0725309	0.107693	0.115738	0.0943283	0.0663141	0.0385242	0.0493568	0.326159	0.0386036	0.0623403	0.0871854	0.0721243	0.11419	0.0979806	0.0909758	0.0532059	0.0398191	0.343575	0.0362364	0.0563639	0.0720066	0.0773183	0.0936589	0.131765	0.057886	0.0735419	0.0505755	0.350647	P49588	Alanine--tRNA ligase cytoplasmic OS=Homo sapiens OX=9606 GN=AARS PE=1 SV=2	CYTOSOL	CYTOSOL	1	CYTOSOL
O43924	0.0343625	0.09637	0.0598114	0.089265	0.103217	0.0873272	0.0617491	0.101537	0.0958532	0.270508	0.0562171	0.0650789	0.0810025	0.0765716	0.101911	0.108003	0.0923567	0.0843257	0.0744946	0.260039	0.0544441	0.060785	0.0544441	0.0623155	0.0813381	0.116541	0.0664699	0.0994862	0.0673445	0.336832	O43924	Retinal rod rhodopsin-sensitive cGMP 3'5'-cyclic phosphodiesterase subunit delta OS=Homo sapiens OX=9606 GN=PDE6D PE=1 SV=1	unknown	CYTOSOL	0.919381	CYTOSOL
P54577	0.0483816	0.113464	0.0607833	0.105206	0.110277	0.0818259	0.0579999	0.0596076	0.072838	0.289617	0.0573507	0.0707631	0.0935068	0.0807647	0.116548	0.112303	0.104655	0.079804	0.0650288	0.219275	0.0447026	0.0553145	0.0652211	0.0684806	0.0853923	0.117746	0.0612937	0.0909173	0.0751651	0.335766	P54577	Tyrosine--tRNA ligase cytoplasmic OS=Homo sapiens OX=9606 GN=YARS PE=1 SV=4	CYTOSOL	CYTOSOL	1	CYTOSOL
P06737	0.0276083	0.0986867	0.061759	0.0975404	0.110922	0.0891658	0.0577875	0.0625168	0.0879571	0.306056	0.0361586	0.058182	0.0839201	0.066156	0.0926624	0.0936283	0.0910176	0.0752376	0.070859	0.332178	0.0327876	0.0452037	0.0519204	0.0589857	0.0754812	0.101447	0.0555929	0.100284	0.0854962	0.392801	P06737	Glycogen phosphorylase liver form OS=Homo sapiens OX=9606 GN=PYGL PE=1 SV=4	unknown	CYTOSOL	0.907725	CYTOSOL
P40925	0.030474	0.13443	0.0828341	0.130529	0.122402	0.0872854	0.0562269	0.0352851	0.0406583	0.279875	0.0486355	0.077895	0.106577	0.100166	0.124646	0.10718	0.102	0.0585443	0.0472685	0.227087	0.0432356	0.0694221	0.088589	0.0955819	0.109807	0.141681	0.0667714	0.0889886	0.0620829	0.23384	P40925	Malate dehydrogenase cytoplasmic OS=Homo sapiens OX=9606 GN=MDH1 PE=1 SV=4	CYTOSOL	CYTOSOL	1	CYTOSOL
P34896	0.0349975	0.109638	0.0598168	0.0983897	0.104966	0.0930918	0.0606519	0.0863063	0.10849	0.243652	0.047735	0.0631508	0.078377	0.0681971	0.0999767	0.100954	0.0954846	0.133433	0.108552	0.204139	0.0494125	0.0596657	0.0650389	0.0624883	0.0868035	0.117767	0.0692898	0.117767	0.110575	0.261193	P34896	Serine hydroxymethyltransferase cytosolic OS=Homo sapiens OX=9606 GN=SHMT1 PE=1 SV=1	CYTOSOL	CYTOSOL	1	CYTOSOL
Q6NUM9	0.0388132	0.202231	0.136795	0.276465	0.196998	0.100282	0.0320856	0.00897016	0.0054626	0.00189753	0.053285	0.120732	0.162765	0.19956	0.199819	0.128686	0.0844542	0.0301992	0.0123513	0.00814796	0.05666	0.10846	0.132649	0.145571	0.185995	0.161807	0.0855975	0.046057	0.028827	0.0483764	Q6NUM9	All-trans-retinol 1314-reductase OS=Homo sapiens OX=9606 GN=RETSAT PE=1 SV=2	unknown	ER	0.935937	ER
A0A0J9YXF2	0.0541839	0.149374	0.1714	0.250844	0.210504	0.101898	0.0473336	0.010656	0.00280672	0.000999001	0.0700332	0.127031	0.173526	0.201615	0.194225	0.138219	0.0758493	0.0128297	0.00366075	0.00301071	0.0712188	0.10597	0.158299	0.17285	0.190203	0.143748	0.0859958	0.0387275	0.0174884	0.0155	A0A0J9YXF2	Paraoxonase 2 isoform CRA_a OS=Homo sapiens OX=9606 GN=PON2 PE=1 SV=1	unknown	ER	0.926797	ER
A0A0G2JJD3	0.0599151	0.199585	0.126937	0.255848	0.195835	0.078472	0.0435298	0.0208272	0.00463923	0.0144112	0.0638512	0.1413	0.151624	0.202957	0.21231	0.113457	0.0886723	0.0161876	0.00453254	0.0051081	0.0816899	0.114757	0.141108	0.154369	0.185651	0.153179	0.0884903	0.0372322	0.0183611	0.0251615	A0A0G2JJD3	HLA-B associated transcript 5 isoform CRA_b OS=Homo sapiens OX=9606 GN=ABHD16A PE=1 SV=1	unknown	ER	0.932288	ER
Q6Y288	0.0355054	0.212425	0.146768	0.261715	0.16697	0.0919724	0.0318979	0.0239994	0.0178476	0.0108985	0.0536143	0.127927	0.167725	0.213657	0.189491	0.124033	0.0792211	0.0228861	0.0147773	0.00666844	0.062494	0.114572	0.138366	0.184424	0.20086	0.150311	0.0737697	0.0306737	0.0161491	0.0283803	Q6Y288	Beta-13-glucosyltransferase OS=Homo sapiens OX=9606 GN=B3GLCT PE=1 SV=2	ER	ER	1	ER
Q15738	0.0453916	0.179767	0.144505	0.270514	0.19108	0.104029	0.0425558	0.0120264	0.00645228	0.00367743	0.0572092	0.11968	0.154459	0.206003	0.221405	0.117971	0.0911622	0.0204813	0.00533876	0.00628937	0.0627827	0.102916	0.136777	0.169043	0.204487	0.1607	0.0924661	0.0406213	0.0161033	0.0141038	Q15738	Sterol-4-alpha-carboxylate 3-dehydrogenase decarboxylating OS=Homo sapiens OX=9606 GN=NSDHL PE=1 SV=2	ER	ER	1	ER
P26572	0.0823236	0.325466	0.138061	0.14066	0.0956345	0.0571419	0.0679942	0.0641661	0.0237067	0.0048467	0.077488	0.209121	0.169437	0.139319	0.101344	0.0819289	0.118026	0.0764632	0.0238556	0.00301754	0.0806313	0.214384	0.201621	0.122456	0.110555	0.0912384	0.0533805	0.0821835	0.0274232	0.0161263	P26572	Alpha-13-mannosyl-glycoprotein 2-beta-N-acetylglucosaminyltransferase OS=Homo sapiens OX=9606 GN=MGAT1 PE=1 SV=2	GOLGI	GOLGI	1	GOLGI
Q9BYC5	0.0667076	0.334358	0.13758	0.167281	0.0943602	0.0701898	0.0571487	0.0522327	0.0189813	0.00116073	0.0731891	0.212509	0.155172	0.137584	0.121673	0.0779333	0.114036	0.0864383	0.0188035	0.00266142	0.0902362	0.190474	0.220612	0.1224	0.104776	0.0796176	0.0626983	0.0836711	0.0292563	0.0162584	Q9BYC5	Alpha-(16)-fucosyltransferase OS=Homo sapiens OX=9606 GN=FUT8 PE=1 SV=2	unknown	GOLGI	0.736285	GOLGI
G5E994	0.0587743	0.257544	0.153384	0.15235	0.126803	0.0918041	0.0806793	0.0602018	0.0154073	0.00305193	0.084739	0.226169	0.163723	0.136006	0.0983661	0.0708474	0.122776	0.0812992	0.0127671	0.00330753	0.0756674	0.181405	0.187358	0.160847	0.115373	0.092421	0.0631482	0.0876342	0.0254679	0.0106781	G5E994	G protein-coupled receptor 107 isoform CRA_c OS=Homo sapiens OX=9606 GN=GPR107 PE=1 SV=1	unknown	GOLGI	0.725289	GOLGI
O60476	0.0663651	0.297574	0.137829	0.147451	0.0990954	0.0757812	0.0696546	0.0622944	0.0249178	0.0190378	0.0782579	0.19347	0.163212	0.128947	0.1179	0.0896471	0.126112	0.0763027	0.0203343	0.0058168	0.0907011	0.193823	0.184017	0.126982	0.118157	0.0776271	0.0723975	0.0982187	0.0300703	0.00800784	O60476	Mannosyl-oligosaccharide 12-alpha-mannosidase IB OS=Homo sapiens OX=9606 GN=MAN1A2 PE=1 SV=1	GOLGI	GOLGI	1	GOLGI
P15291	0.0671122	0.351206	0.167153	0.150423	0.0872906	0.0578532	0.0502969	0.0521275	0.0154318	0.00110683	0.0862463	0.243708	0.17657	0.139549	0.0913563	0.0618918	0.0944278	0.0833922	0.0170699	0.00578962	0.0866388	0.208126	0.196483	0.15485	0.130721	0.0766822	0.0509876	0.0654007	0.0208367	0.00927413	P15291	Beta-14-galactosyltransferase 1 OS=Homo sapiens OX=9606 GN=B4GALT1 PE=1 SV=5	unknown	GOLGI	0.611468	GOLGI
Q10469	0.0738229	0.291857	0.150489	0.148741	0.102695	0.0717205	0.0749186	0.0679301	0.0176192	0.000207285	0.0757308	0.203585	0.159349	0.128516	0.10513	0.0867623	0.134142	0.0778268	0.0189189	0.0100386	0.0834033	0.191041	0.185376	0.135334	0.105749	0.0847671	0.0680864	0.0884389	0.0316828	0.0261225	Q10469	Alpha-16-mannosyl-glycoprotein 2-beta-N-acetylglucosaminyltransferase OS=Homo sapiens OX=9606 GN=MGAT2 PE=1 SV=1	unknown	GOLGI	0.798283	GOLGI
Q9UKM7	0.0691568	0.243958	0.137125	0.145734	0.105032	0.0761805	0.0888953	0.088391	0.030076	0.0154522	0.0834271	0.19863	0.164579	0.128353	0.0983525	0.0855521	0.126578	0.0888522	0.0201505	0.00552514	0.0841537	0.189125	0.20765	0.130024	0.11097	0.0731096	0.0653117	0.0940334	0.0297802	0.0158428	Q9UKM7	Endoplasmic reticulum mannosyl-oligosaccharide 12-alpha-mannosidase OS=Homo sapiens OX=9606 GN=MAN1B1 PE=1 SV=2	unknown	GOLGI	0.727086	GOLGI
O00330	0.223735	0.585385	0.0761988	0.0266107	0.0162735	0.0117189	0.0102861	0.0203163	0.0201627	0.00931375	0.273694	0.448305	0.105163	0.0287499	0.019631	0.0194199	0.0216574	0.0344493	0.0265547	0.0223751	0.332057	0.388604	0.104091	0.0263387	0.0219949	0.0240088	0.0172564	0.0345127	0.0301295	0.0210077	O00330	Pyruvate dehydrogenase protein X component mitochondrial OS=Homo sapiens OX=9606 GN=PDHX PE=1 SV=3	MITOCHONDRIA	MITOCHONDRIA	1	MITOCHONDRIA
Q13423	0.25952	0.589109	0.0935072	0.0178347	0.0122958	0.0072185	0.00416699	0.00502603	0.00519271	0.00612868	0.296834	0.508054	0.11942	0.023192	0.0127422	0.00980969	0.00889273	0.00871107	0.00548443	0.00685986	0.335154	0.422053	0.116407	0.0298365	0.0223801	0.0192112	0.0107131	0.0154281	0.0114697	0.0173471	Q13423	NAD(P) transhydrogenase mitochondrial OS=Homo sapiens OX=9606 GN=NNT PE=1 SV=3	MITOCHONDRIA	MITOCHONDRIA	1	MITOCHONDRIA
Q9UIJ7	0.22662	0.657046	0.0645252	0.00525622	0.00729088	0.00695177	0.00350414	0.00770535	0.0110399	0.0100603	0.314704	0.505986	0.111786	0.018797	0.0113789	0.0101929	0.00868242	0.00853697	0.00497897	0.00495659	0.353059	0.427929	0.111478	0.0233684	0.0150495	0.0161047	0.00991825	0.0154827	0.0109734	0.0166378	Q9UIJ7	GTP:AMP phosphotransferase AK3 mitochondrial OS=Homo sapiens OX=9606 GN=AK3 PE=1 SV=4	unknown	MITOCHONDRIA	0.946267	MITOCHONDRIA
Q9HA77	0.264032	0.538347	0.0675257	0.00830133	0.0195763	0.0133812	0.0164788	0.0281254	0.0318424	0.01239	0.263755	0.501744	0.115405	0.0322732	0.0196592	0.0108696	0.0134863	0.0211353	0.0128824	0.00878959	0.336826	0.400207	0.118484	0.0398396	0.0249644	0.0175915	0.011124	0.0219894	0.0153926	0.0135817	Q9HA77	Probable cysteine--tRNA ligase mitochondrial OS=Homo sapiens OX=9606 GN=CARS2 PE=1 SV=1	unknown	MITOCHONDRIA	0.953055	MITOCHONDRIA
Q16836	0.210413	0.633339	0.0682491	0.0321543	0.0133607	0.00781122	0.0055961	0.00965327	0.00778791	0.0116352	0.313767	0.507889	0.106331	0.0161481	0.0101819	0.00756866	0.00924511	0.0134855	0.00816035	0.00722351	0.328746	0.43101	0.108004	0.0245099	0.0189573	0.0196215	0.0119569	0.0192639	0.0148354	0.0230962	Q16836	Hydroxyacyl-coenzyme A dehydrogenase mitochondrial OS=Homo sapiens OX=9606 GN=HADH PE=1 SV=3	MITOCHONDRIA	MITOCHONDRIA	1	MITOCHONDRIA
P24539	0.264724	0.597239	0.0744004	0.0185443	0.0114891	0.00847741	0.00694367	0.00819855	0.00761294	0.00237033	0.306384	0.481238	0.134054	0.0279405	0.0110861	0.0079315	0.00700015	0.00760102	0.00760102	0.00916329	0.325072	0.435039	0.130499	0.0283035	0.0158439	0.0151913	0.00939402	0.0114883	0.00854415	0.0206243	P24539	ATP synthase F(0) complex subunit B1 mitochondrial OS=Homo sapiens OX=9606 GN=ATP5F1 PE=1 SV=2	MITOCHONDRIA	MITOCHONDRIA	1	MITOCHONDRIA
P43304	0.235257	0.598715	0.0787568	0.0270929	0.0135356	0.00732822	0.00732822	0.0105181	0.0118976	0.00956979	0.282201	0.497608	0.118242	0.0225	0.015012	0.011866	0.0141866	0.0155383	0.0117105	0.0111364	0.33812	0.411245	0.112946	0.0229206	0.0272838	0.0209875	0.0108804	0.0164586	0.0156302	0.0235281	P43304	Glycerol-3-phosphate dehydrogenase mitochondrial OS=Homo sapiens OX=9606 GN=GPD2 PE=1 SV=3	MITOCHONDRIA	MITOCHONDRIA	1	MITOCHONDRIA
P23786	0.253002	0.571199	0.0825884	0.0301477	0.012867	0.0090518	0.00714419	0.0119693	0.012306	0.00972508	0.288261	0.504378	0.11266	0.0186257	0.0146779	0.0113535	0.012897	0.0165776	0.0103888	0.0101811	0.339499	0.435075	0.107399	0.0275192	0.0164785	0.0179204	0.0121529	0.0145423	0.0156134	0.0138008	P23786	Carnitine O-palmitoyltransferase 2 mitochondrial OS=Homo sapiens OX=9606 GN=CPT2 PE=1 SV=2	MITOCHONDRIA	MITOCHONDRIA	1	MITOCHONDRIA
P23368	0.188175	0.661224	0.0798437	0.0229128	0.0103591	0.00785708	0.00627689	0.00838381	0.0113686	0.00359933	0.280665	0.51779	0.113336	0.0165205	0.0103369	0.0127134	0.0125519	0.016659	0.0111214	0.00830641	0.33452	0.423431	0.11244	0.0265942	0.0193113	0.0192124	0.0111386	0.0146317	0.0128852	0.0258362	P23368	NAD-dependent malic enzyme mitochondrial OS=Homo sapiens OX=9606 GN=ME2 PE=1 SV=1	MITOCHONDRIA	MITOCHONDRIA	1	MITOCHONDRIA
P21912	0.21889	0.655917	0.0754468	0.0196049	0.0118909	0.00553151	0.00244591	0.00304798	0.00316087	0.00406397	0.278368	0.519126	0.121725	0.0287596	0.0125638	0.00681844	0.00775949	0.0114081	0.00660382	0.00686797	0.356402	0.399879	0.138206	0.0296699	0.0191982	0.0142907	0.00722309	0.0102471	0.00862278	0.0162606	P21912	Succinate dehydrogenase [ubiquinone] iron-sulfur subunit mitochondrial OS=Homo sapiens OX=9606 GN=SDHB PE=1 SV=3	MITOCHONDRIA	MITOCHONDRIA	1	MITOCHONDRIA
A0A087X2D5	0.220983	0.616529	0.0712692	0.00875005	0.0171064	0.0100188	0.00805005	0.0171064	0.0213501	0.00883756	0.303575	0.494758	0.10895	0.0216005	0.0115581	0.00963178	0.0094423	0.0168635	0.013074	0.0105476	0.335705	0.400182	0.112065	0.029085	0.0181168	0.0172758	0.0110383	0.023268	0.0313978	0.0218663	A0A087X2D5	39S ribosomal protein L45 mitochondrial OS=Homo sapiens OX=9606 GN=MRPL45 PE=1 SV=1	unknown	MITOCHONDRIA	0.955895	MITOCHONDRIA
Q5JTZ9	0.244505	0.592647	0.071487	0.0368833	0.0194061	0.0109306	0.00438391	0.00385784	0.00742343	0.00847557	0.291831	0.48127	0.10856	0.0218745	0.0173311	0.0137205	0.0146231	0.0178727	0.0138107	0.0191064	0.350799	0.417654	0.105881	0.0340254	0.0193499	0.0158713	0.00902272	0.0118491	0.0169584	0.018589	Q5JTZ9	Alanine--tRNA ligase mitochondrial OS=Homo sapiens OX=9606 GN=AARS2 PE=1 SV=1	MITOCHONDRIA	MITOCHONDRIA	1	MITOCHONDRIA
Q9P0J1	0.291702	0.432685	0.0893314	0.0392682	0.0383269	0.022855	0.0215019	0.0244433	0.0254434	0.0144425	0.259902	0.443974	0.109975	0.0273783	0.0256479	0.0232254	0.0250711	0.0384142	0.0264554	0.0199569	0.309334	0.347561	0.127711	0.0302563	0.035399	0.0323991	0.0171424	0.0295706	0.0308563	0.0397703	Q9P0J1	[Pyruvate dehydrogenase [acetyl-transferring]]-phosphatase 1 mitochondrial OS=Homo sapiens OX=9606 GN=PDP1 PE=1 SV=3	MITOCHONDRIA	MITOCHONDRIA	1	MITOCHONDRIA
Q5JPH6	0.191637	0.465604	0.0715743	0.036807	0.0392175	0.0286482	0.0300389	0.0371778	0.0419062	0.0573892	0.239676	0.436858	0.116166	0.0305029	0.0267556	0.0275051	0.0279547	0.0408454	0.0279547	0.0257813	0.292688	0.332384	0.097246	0.0379867	0.0385565	0.0290598	0.0269706	0.0531814	0.0419753	0.0499525	Q5JPH6	Probable glutamate--tRNA ligase mitochondrial OS=Homo sapiens OX=9606 GN=EARS2 PE=1 SV=2	MITOCHONDRIA	MITOCHONDRIA	1	MITOCHONDRIA
P28331	0.31512	0.50853	0.0858011	0.0264751	0.0172034	0.0110253	0.00759	0.00997311	0.00908282	0.00919972	0.303802	0.504081	0.107553	0.0212587	0.0137625	0.0114615	0.0105064	0.0114687	0.00772058	0.00838628	0.34051	0.422776	0.110813	0.0285001	0.0226787	0.0181509	0.0107387	0.0140389	0.0119994	0.0197943	P28331	NADH-ubiquinone oxidoreductase 75 kDa subunit mitochondrial OS=Homo sapiens OX=9606 GN=NDUFS1 PE=1 SV=3	MITOCHONDRIA	MITOCHONDRIA	1	MITOCHONDRIA
O43181	0.140389	0.729387	0.0753855	0.00292927	0.0136556	0.0101232	0.00469544	0.00831395	0.00947704	0.00564315	0.329634	0.515911	0.099281	0.0103782	0.010472	0.00781494	0.00659581	0.0083151	0.00634573	0.00525164	0.31619	0.450777	0.103612	0.0275938	0.0230614	0.0187638	0.0135268	0.0197501	0.0105678	0.0161571	O43181	NADH dehydrogenase [ubiquinone] iron-sulfur protein 4 mitochondrial OS=Homo sapiens OX=9606 GN=NDUFS4 PE=1 SV=1	MITOCHONDRIA	MITOCHONDRIA	1	MITOCHONDRIA
P26440	0.288176	0.594471	0.0680546	0.00638319	0.00746342	0.00689875	0.00424727	0.00724246	0.00969754	0.00736522	0.307468	0.498878	0.108151	0.0229348	0.00936701	0.00908	0.0103846	0.0149768	0.00876689	0.00999322	0.343942	0.416196	0.114945	0.0226771	0.0201185	0.0160702	0.0123199	0.020136	0.0140374	0.0195577	P26440	Isovaleryl-CoA dehydrogenase mitochondrial OS=Homo sapiens OX=9606 GN=IVD PE=1 SV=1	MITOCHONDRIA	MITOCHONDRIA	1	MITOCHONDRIA
P82675	0.230979	0.629932	0.0672487	0.00440493	0.0085162	0.00985103	0.00832933	0.0132415	0.0185007	0.00899674	0.281073	0.515884	0.102537	0.0109003	0.0155218	0.0145181	0.0143781	0.0164087	0.0145415	0.014238	0.327742	0.384721	0.095542	0.0141307	0.0254353	0.0228827	0.0205124	0.0350077	0.0369222	0.0371046	P82675	28S ribosomal protein S5 mitochondrial OS=Homo sapiens OX=9606 GN=MRPS5 PE=1 SV=2	unknown	MITOCHONDRIA	0.947993	MITOCHONDRIA
Q9NYY8	0.263359	0.514231	0.0718866	0.0375745	0.0240747	0.0214872	0.00989988	0.0141748	0.0209247	0.0223872	0.285575	0.478306	0.113002	0.0302734	0.0203683	0.0155552	0.0179967	0.0175084	0.0093471	0.0120675	0.35037	0.414615	0.107315	0.0198119	0.0218218	0.0165817	0.0129208	0.0202426	0.0169406	0.0193812	Q9NYY8	FAST kinase domain-containing protein 2 mitochondrial OS=Homo sapiens OX=9606 GN=FASTKD2 PE=1 SV=1	unknown	MITOCHONDRIA	0.95447	MITOCHONDRIA
Q04837	0.365812	0.468302	0.103799	0.0184727	0.00996256	0.00879651	0.00658716	0.00668944	0.00493014	0.00664853	0.339533	0.444496	0.112468	0.0347415	0.0161085	0.00913618	0.00870685	0.0134295	0.00865533	0.0127254	0.354387	0.417028	0.0964174	0.0295871	0.0198681	0.0168183	0.0100733	0.0185394	0.0133256	0.0239557	Q04837	Single-stranded DNA-binding protein mitochondrial OS=Homo sapiens OX=9606 GN=SSBP1 PE=1 SV=1	MITOCHONDRIA	MITOCHONDRIA	1	MITOCHONDRIA
P27144	0.213099	0.562977	0.0688472	0.0233303	0.0298872	0.0279048	0.0160872	0.0192132	0.0147911	0.023864	0.305166	0.470468	0.106335	0.0189084	0.0192982	0.0226121	0.0188109	0.0135478	0.0157895	0.00906433	0.346968	0.425214	0.108736	0.022679	0.0195272	0.0191161	0.00979788	0.0148681	0.0106201	0.0224734	P27144	Adenylate kinase 4 mitochondrial OS=Homo sapiens OX=9606 GN=AK4 PE=1 SV=1	MITOCHONDRIA	MITOCHONDRIA	1	MITOCHONDRIA
Q9BYD3	0.214008	0.615027	0.0858624	0.023734	0.0109507	0.0082242	0.00768784	0.0119787	0.0135878	0.00893935	0.283609	0.500735	0.111145	0.0294727	0.0153394	0.00848001	0.00866845	0.0139826	0.0136811	0.0148871	0.340535	0.405915	0.115158	0.0364218	0.0223357	0.0117852	0.00611707	0.0161064	0.0283967	0.0172288	Q9BYD3	39S ribosomal protein L4 mitochondrial OS=Homo sapiens OX=9606 GN=MRPL4 PE=1 SV=1	unknown	MITOCHONDRIA	0.95263	MITOCHONDRIA
A0A1W2PQV2	0.280551	0.538488	0.097437	0.0305406	0.0135688	0.00495369	0.00357527	0.00598751	0.00857204	0.0163257	0.317007	0.471334	0.114455	0.0329472	0.0160749	0.0126333	0.00831025	0.00675732	0.00948544	0.0109964	0.346065	0.407545	0.12432	0.035789	0.0181038	0.0126099	0.00664504	0.0150167	0.0123483	0.0215571	A0A1W2PQV2	Glycine cleavage system H protein mitochondrial (Fragment) OS=Homo sapiens OX=9606 GN=GCSH PE=1 SV=1	unknown	MITOCHONDRIA	0.950057	MITOCHONDRIA
P82650	0.309837	0.530409	0.0787466	0.0187761	0.0123081	0.00976483	0.00587146	0.00929386	0.0165782	0.00841471	0.293913	0.468548	0.114365	0.0259359	0.0164947	0.0150126	0.0188275	0.0178944	0.0150675	0.0139423	0.340334	0.412226	0.109964	0.0240988	0.0203958	0.0163745	0.0131922	0.0204536	0.0202511	0.0227102	P82650	28S ribosomal protein S22 mitochondrial OS=Homo sapiens OX=9606 GN=MRPS22 PE=1 SV=1	unknown	MITOCHONDRIA	0.953209	MITOCHONDRIA
P11498	0.196961	0.614466	0.0694928	0.0362627	0.0187121	0.00925926	0.00809782	0.0116789	0.0146148	0.0204543	0.261626	0.486344	0.120578	0.0363409	0.0212651	0.0135711	0.0155585	0.0154165	0.0110442	0.0182556	0.323579	0.370028	0.121491	0.0319851	0.0237465	0.0237838	0.01685	0.0226654	0.0198695	0.0460019	P11498	Pyruvate carboxylase mitochondrial OS=Homo sapiens OX=9606 GN=PC PE=1 SV=2	MITOCHONDRIA	MITOCHONDRIA	1	MITOCHONDRIA
Q13405	0.212286	0.663576	0.0741204	0.00909192	0.00641126	0.00545069	0.00344019	0.00810901	0.0159723	0.00154138	0.308067	0.500017	0.112568	0.0251766	0.0117603	0.00679261	0.00760366	0.0128417	0.0102734	0.00490014	0.348139	0.393854	0.117002	0.0282853	0.0180414	0.0131488	0.0117728	0.0237367	0.0277884	0.0182326	Q13405	39S ribosomal protein L49 mitochondrial OS=Homo sapiens OX=9606 GN=MRPL49 PE=1 SV=1	unknown	MITOCHONDRIA	0.946033	MITOCHONDRIA
G3V0I5	0.251547	0.614821	0.0672708	0.00692062	0.0103516	0.00894402	0.00853347	0.0126683	0.0107035	0.00824023	0.300044	0.469908	0.113988	0.0378325	0.0183166	0.00599651	0.0148277	0.0147732	0.00997601	0.0143371	0.293943	0.41691	0.0951298	0.0212114	0.0288752	0.024623	0.0140915	0.0252163	0.0242769	0.0557231	G3V0I5	NADH dehydrogenase [ubiquinone] flavoprotein 1 mitochondrial OS=Homo sapiens OX=9606 GN=NDUFV1 PE=1 SV=1	unknown	MITOCHONDRIA	0.948255	MITOCHONDRIA
Q92947	0.249333	0.492552	0.0805958	0.0467703	0.0284265	0.0139205	0.0139205	0.0253041	0.0281663	0.0210109	0.285763	0.503704	0.109818	0.0140077	0.013799	0.0130165	0.0135121	0.0213376	0.0106427	0.014399	0.337258	0.403598	0.121095	0.0210668	0.0201564	0.0191831	0.013312	0.0192459	0.0165458	0.0285391	Q92947	Glutaryl-CoA dehydrogenase mitochondrial OS=Homo sapiens OX=9606 GN=GCDH PE=1 SV=1	unknown	MITOCHONDRIA	0.9524	MITOCHONDRIA
P36957	0.209005	0.659861	0.0658072	0.0109491	0.00933385	0.00631798	0.00467204	0.00953832	0.0168786	0.00763679	0.315221	0.517885	0.116021	0.0188805	0.00684676	0.00414955	0.00425329	0.00591311	0.0055189	0.00531142	0.381232	0.463564	0.0701408	0.0152056	0.0166546	0.011525	0.00494641	0.0108005	0.0155804	0.0103508	P36957	Dihydrolipoyllysine-residue succinyltransferase component of 2-oxoglutarate dehydrogenase complex mitochondrial OS=Homo sapiens OX=9606 GN=DLST PE=1 SV=4	MITOCHONDRIA	MITOCHONDRIA	1	MITOCHONDRIA
O75390	0.26865	0.567651	0.0717341	0.0186973	0.0152089	0.0110095	0.00892093	0.0144535	0.0125649	0.0111095	0.297909	0.51675	0.112452	0.0180097	0.00994174	0.00754427	0.0102445	0.0118728	0.00769155	0.00758518	0.364834	0.407231	0.118768	0.0235113	0.0168452	0.0138777	0.0117502	0.0163979	0.0118375	0.0149469	O75390	Citrate synthase mitochondrial OS=Homo sapiens OX=9606 GN=CS PE=1 SV=2	MITOCHONDRIA	MITOCHONDRIA	1	MITOCHONDRIA
P11182	0.203019	0.639145	0.0701635	0.024478	0.0122264	0.00943396	0.00699371	0.0139119	0.0106164	0.0100126	0.285356	0.487086	0.0997424	0.0282714	0.0188916	0.013343	0.0132109	0.0229209	0.0143999	0.0167779	0.337848	0.375358	0.147174	0.0302162	0.0203178	0.00989841	0.0125033	0.0268299	0.01615	0.0237041	P11182	Lipoamide acyltransferase component of branched-chain alpha-keto acid dehydrogenase complex mitochondrial OS=Homo sapiens OX=9606 GN=DBT PE=1 SV=3	MITOCHONDRIA	MITOCHONDRIA	1	MITOCHONDRIA
P54819	0.202818	0.63588	0.0588016	0.0118295	0.0187888	0.0136525	0.0105521	0.00781094	0.0113239	0.0285425	0.307231	0.482479	0.1055	0.0153517	0.0192987	0.0166165	0.0150574	0.0127132	0.00960574	0.0161477	0.339948	0.397738	0.106073	0.0186148	0.0220282	0.026672	0.0160151	0.0230204	0.0153007	0.0345902	P54819	Adenylate kinase 2 mitochondrial OS=Homo sapiens OX=9606 GN=AK2 PE=1 SV=2	MITOCHONDRIA	MITOCHONDRIA	1	MITOCHONDRIA
O95831	0.234924	0.628022	0.0742659	0.0216036	0.011291	0.00712425	0.00440868	0.00605781	0.00705828	0.00524424	0.298954	0.505546	0.113067	0.0307603	0.0133586	0.00862682	0.0081603	0.00827878	0.00562039	0.00762714	0.357677	0.436913	0.114358	0.0230886	0.0137959	0.010603	0.00907427	0.0116196	0.011341	0.0115292	O95831	Apoptosis-inducing factor 1 mitochondrial OS=Homo sapiens OX=9606 GN=AIFM1 PE=1 SV=1	unknown	MITOCHONDRIA	0.950469	MITOCHONDRIA
P18859	0.210486	0.62317	0.0730147	0.0261249	0.0164857	0.00810774	0.00752218	0.0123418	0.012612	0.0101347	0.314963	0.463952	0.115266	0.0312271	0.0198228	0.0102296	0.0138026	0.0129215	0.00910381	0.00871225	0.371071	0.419377	0.122688	0.0212301	0.0149582	0.0113136	0.00779043	0.0113895	0.00748671	0.0126955	P18859	ATP synthase-coupling factor 6 mitochondrial OS=Homo sapiens OX=9606 GN=ATP5J PE=1 SV=1	MITOCHONDRIA	MITOCHONDRIA	1	MITOCHONDRIA
Q02338	0.240892	0.615433	0.0728672	0.00814609	0.0132486	0.00778802	0.00948886	0.0154865	0.0128905	0.00375974	0.293828	0.508874	0.113439	0.0165273	0.0127104	0.0124432	0.0119089	0.0130539	0.0109164	0.00629795	0.348902	0.426594	0.113994	0.0289337	0.0188427	0.0144222	0.0123683	0.0107609	0.00906412	0.0161189	Q02338	D-beta-hydroxybutyrate dehydrogenase mitochondrial OS=Homo sapiens OX=9606 GN=BDH1 PE=1 SV=3	unknown	MITOCHONDRIA	0.955562	MITOCHONDRIA
Q02252	0.21275	0.640558	0.0735517	0.0139135	0.0131546	0.00929674	0.00610296	0.0119529	0.0101821	0.00853782	0.270787	0.473668	0.116367	0.0337433	0.0159781	0.0212341	0.0218648	0.0171344	0.0120887	0.0171344	0.345016	0.419496	0.103379	0.0131435	0.0270452	0.0232539	0.0112057	0.0208948	0.0170191	0.0195467	Q02252	Methylmalonate-semialdehyde dehydrogenase [acylating] mitochondrial OS=Homo sapiens OX=9606 GN=ALDH6A1 PE=1 SV=2	unknown	MITOCHONDRIA	0.948805	MITOCHONDRIA
P42126	0.295426	0.566094	0.0820482	0.0207526	0.00868593	0.00613736	0.0035888	0.00473305	0.00377084	0.00876395	0.285773	0.496333	0.124118	0.0378128	0.0137043	0.00994592	0.00673756	0.00861674	0.00595838	0.0110001	0.328351	0.405925	0.107066	0.0293899	0.0235862	0.0151167	0.0118437	0.0209205	0.0197058	0.0380956	P42126	Enoyl-CoA delta isomerase 1 mitochondrial OS=Homo sapiens OX=9606 GN=ECI1 PE=1 SV=1	MITOCHONDRIA	MITOCHONDRIA	1	MITOCHONDRIA
Q96GC5	0.208635	0.62137	0.0784591	0.0248572	0.0140779	0.0091889	0.00453555	0.0134888	0.0176121	0.00777523	0.265659	0.497078	0.111612	0.0342396	0.0146106	0.0125143	0.0142294	0.0191208	0.018168	0.0127684	0.333918	0.392925	0.10748	0.0407777	0.0276803	0.0189036	0.0114772	0.0183635	0.0280853	0.0203889	Q96GC5	39S ribosomal protein L48 mitochondrial OS=Homo sapiens OX=9606 GN=MRPL48 PE=1 SV=2	unknown	MITOCHONDRIA	0.951875	MITOCHONDRIA
P34897	0.242313	0.59668	0.0761709	0.020054	0.011715	0.00897684	0.00662762	0.0077011	0.010097	0.019665	0.280418	0.441894	0.122199	0.0365059	0.0204777	0.0155327	0.0175957	0.0237541	0.0172316	0.0243912	0.330524	0.395386	0.118561	0.0277347	0.0205689	0.0202063	0.0138528	0.0217874	0.0173052	0.0340736	P34897	Serine hydroxymethyltransferase mitochondrial OS=Homo sapiens OX=9606 GN=SHMT2 PE=1 SV=3	MITOCHONDRIA	MITOCHONDRIA	1	MITOCHONDRIA
P32322	0.254953	0.569187	0.0606451	0.030992	0.0170828	0.0136861	0.00840503	0.0173059	0.0170084	0.0107356	0.341098	0.482699	0.0956917	0.0241534	0.0145658	0.00854281	0.0122918	0.00854281	0.00682195	0.00559277	0.423163	0.418504	0.0796239	0.00990099	0.0152259	0.012397	0.0118146	0.0178051	0.00748814	0.00407688	P32322	Pyrroline-5-carboxylate reductase 1 mitochondrial OS=Homo sapiens OX=9606 GN=PYCR1 PE=1 SV=2	MITOCHONDRIA	MITOCHONDRIA	1	MITOCHONDRIA
M0QWZ7	0.234928	0.644938	0.0728282	0.0140105	0.00725016	0.00502939	0.00349445	0.00432724	0.00555193	0.00764206	0.279864	0.506464	0.120978	0.0308295	0.0161168	0.00895051	0.0101205	0.012168	0.00544051	0.00906751	0.339178	0.399531	0.123792	0.0263611	0.0209549	0.0182518	0.0127978	0.0197589	0.011841	0.0275333	M0QWZ7	Serine--tRNA ligase mitochondrial OS=Homo sapiens OX=9606 GN=SARS2 PE=1 SV=1	unknown	MITOCHONDRIA	0.950767	MITOCHONDRIA
Q8TCS8	0.200685	0.652911	0.0670958	0.0174448	0.0147318	0.010235	0.00753685	0.0127472	0.0106363	0.00597596	0.291926	0.487836	0.109174	0.0296298	0.0159976	0.01057	0.0131676	0.0191443	0.0116471	0.0109079	0.338041	0.399971	0.110298	0.0312188	0.023986	0.0199009	0.0174585	0.0237452	0.0181809	0.0172005	Q8TCS8	Polyribonucleotide nucleotidyltransferase 1 mitochondrial OS=Homo sapiens OX=9606 GN=PNPT1 PE=1 SV=2	unknown	MITOCHONDRIA	0.950499	MITOCHONDRIA
P49411	0.227202	0.641055	0.067097	0.0161514	0.00999699	0.00771658	0.00463264	0.00696692	0.0088523	0.0103292	0.317258	0.508538	0.107045	0.0169139	0.00925433	0.00858267	0.00835106	0.00884074	0.00696804	0.00824849	0.366929	0.427757	0.111167	0.0194419	0.0144536	0.0129048	0.00702762	0.00949502	0.00741111	0.0234135	P49411	Elongation factor Tu mitochondrial OS=Homo sapiens OX=9606 GN=TUFM PE=1 SV=2	MITOCHONDRIA	MITOCHONDRIA	1	MITOCHONDRIA
P00367	0.20847	0.642831	0.0686872	0.0146312	0.0108281	0.0107964	0.00712014	0.0167545	0.0145783	0.00530313	0.301466	0.502926	0.110666	0.018748	0.0107582	0.00995035	0.014295	0.0164723	0.00941835	0.00530028	0.345346	0.431456	0.100638	0.0174217	0.019131	0.0169275	0.0152595	0.0308175	0.0162171	0.00678542	P00367	Glutamate dehydrogenase 1 mitochondrial OS=Homo sapiens OX=9606 GN=GLUD1 PE=1 SV=2	MITOCHONDRIA	MITOCHONDRIA	1	MITOCHONDRIA
E9PF16	0.23455	0.62114	0.0740177	0.0179837	0.0114551	0.00829094	0.00580767	0.00612809	0.00740978	0.0132174	0.276009	0.503756	0.111727	0.027425	0.019913	0.0137125	0.0123115	0.0144279	0.00906218	0.0116556	0.313524	0.396913	0.122171	0.0254759	0.0266124	0.0229188	0.0171891	0.0220665	0.0157685	0.0373615	E9PF16	Acyl-CoA synthetase family member 2 mitochondrial OS=Homo sapiens OX=9606 GN=ACSF2 PE=1 SV=1	unknown	MITOCHONDRIA	0.955879	MITOCHONDRIA
P51398	0.304487	0.537247	0.0759755	0.015008	0.012942	0.0119674	0.00639301	0.00970647	0.0163724	0.00990138	0.305541	0.506892	0.107384	0.0197741	0.0115482	0.0098711	0.00967943	0.0116441	0.0110371	0.00662865	0.34194	0.424247	0.108432	0.0301558	0.0182357	0.0149509	0.00978666	0.0157298	0.0192516	0.0172706	P51398	28S ribosomal protein S29 mitochondrial OS=Homo sapiens OX=9606 GN=DAP3 PE=1 SV=1	unknown	MITOCHONDRIA	0.952252	MITOCHONDRIA
P42765	0.2127	0.63541	0.0711601	0.0240897	0.0115828	0.0085844	0.00638696	0.00811205	0.0109872	0.0109872	0.303958	0.505854	0.107502	0.0168495	0.0135898	0.00966439	0.010904	0.0124191	0.00904458	0.0102153	0.348594	0.423311	0.120775	0.0275497	0.0136896	0.0117492	0.00976608	0.0161418	0.0118558	0.0165682	P42765	3-ketoacyl-CoA thiolase mitochondrial OS=Homo sapiens OX=9606 GN=ACAA2 PE=1 SV=2	MITOCHONDRIA	MITOCHONDRIA	1	MITOCHONDRIA
P45954	0.296229	0.476817	0.0928127	0.0438479	0.0201527	0.0142486	0.00968275	0.0127529	0.0163741	0.0170826	0.249494	0.478273	0.127417	0.0394955	0.0199779	0.0152826	0.0141779	0.0209906	0.0116001	0.0232922	0.304774	0.343696	0.11836	0.0408813	0.0329253	0.0249694	0.0220318	0.0328029	0.0270502	0.0525092	P45954	Short/branched chain specific acyl-CoA dehydrogenase mitochondrial OS=Homo sapiens OX=9606 GN=ACADSB PE=1 SV=1	MITOCHONDRIA	MITOCHONDRIA	1	MITOCHONDRIA
Q6PI48	0.280294	0.55568	0.0723182	0.0150052	0.0100442	0.00915332	0.00756372	0.0192674	0.0208046	0.00986951	0.290741	0.505298	0.112061	0.0193111	0.0127447	0.0101779	0.0112524	0.0186993	0.0101779	0.00953617	0.36665	0.423064	0.111129	0.0184531	0.0136309	0.0132747	0.00968546	0.013946	0.0105759	0.0195901	Q6PI48	Aspartate--tRNA ligase mitochondrial OS=Homo sapiens OX=9606 GN=DARS2 PE=1 SV=1	unknown	MITOCHONDRIA	0.954533	MITOCHONDRIA
P10606	0.228386	0.554547	0.10838	0.0238107	0.0161458	0.0127806	0.00887167	0.00678122	0.00732507	0.0329713	0.319713	0.481073	0.111938	0.0209812	0.0115668	0.0108603	0.012569	0.0127497	0.00777142	0.0107781	0.370224	0.427043	0.112767	0.0184089	0.0163802	0.0148713	0.00881884	0.0128091	0.00885238	0.0098248	P10606	Cytochrome c oxidase subunit 5B mitochondrial OS=Homo sapiens OX=9606 GN=COX5B PE=1 SV=2	MITOCHONDRIA	MITOCHONDRIA	1	MITOCHONDRIA
Q9BYD6	0.210074	0.615651	0.0623739	0.0309618	0.0184282	0.0128469	0.00575759	0.0138261	0.0177624	0.0123181	0.29966	0.50234	0.106981	0.0196839	0.0115223	0.0110222	0.0107421	0.014963	0.0152631	0.00782156	0.319074	0.396733	0.106825	0.0243438	0.0229438	0.0243827	0.0131441	0.0252382	0.030488	0.0368268	Q9BYD6	39S ribosomal protein L1 mitochondrial OS=Homo sapiens OX=9606 GN=MRPL1 PE=1 SV=2	unknown	MITOCHONDRIA	0.951815	MITOCHONDRIA
P47985	0.254061	0.593762	0.0699374	0.0259416	0.0144723	0.0115778	0.00506531	0.00535475	0.00929846	0.0105286	0.297567	0.519756	0.106998	0.0250986	0.0129055	0.00808308	0.00679527	0.00857628	0.00479505	0.00942569	0.361956	0.414804	0.127845	0.0274419	0.0221489	0.0145352	0.00736941	0.00757298	0.00728798	0.00903872	P47985	Cytochrome b-c1 complex subunit Rieske mitochondrial OS=Homo sapiens OX=9606 GN=UQCRFS1 PE=1 SV=2	MITOCHONDRIA	MITOCHONDRIA	1	MITOCHONDRIA
Q16595	0.233153	0.563793	0.0891889	0.0335842	0.0131128	0.013666	0.010789	0.0103464	0.0127808	0.0195861	0.278934	0.487094	0.102692	0.0220649	0.0183181	0.0199833	0.0140161	0.0231751	0.012212	0.0215099	0.322809	0.352731	0.123359	0.0313905	0.0267095	0.0288206	0.0266177	0.0287288	0.0206517	0.0381827	Q16595	Frataxin mitochondrial OS=Homo sapiens OX=9606 GN=FXN PE=1 SV=2	MITOCHONDRIA	MITOCHONDRIA	1	MITOCHONDRIA
P82673	0.250999	0.601684	0.0635657	0.0163639	0.0124554	0.0096637	0.00738736	0.00854701	0.0176524	0.0116823	0.279621	0.497441	0.111827	0.0211876	0.0177205	0.0128226	0.0136481	0.0194816	0.0144186	0.011832	0.306614	0.376413	0.0994516	0.0388599	0.0368966	0.0324961	0.0268093	0.036355	0.0267416	0.0193623	P82673	28S ribosomal protein S35 mitochondrial OS=Homo sapiens OX=9606 GN=MRPS35 PE=1 SV=1	unknown	MITOCHONDRIA	0.949002	MITOCHONDRIA
Q9NSE4	0.259569	0.5891	0.0739917	0.0184381	0.0121606	0.00858533	0.00581124	0.00874078	0.0113236	0.0122801	0.280989	0.499159	0.121431	0.0215191	0.0133677	0.0120278	0.0118346	0.012545	0.0105134	0.0166145	0.346467	0.424492	0.110112	0.0220695	0.0166774	0.017042	0.0113613	0.0151661	0.0116651	0.0249478	Q9NSE4	Isoleucine--tRNA ligase mitochondrial OS=Homo sapiens OX=9606 GN=IARS2 PE=1 SV=2	unknown	MITOCHONDRIA	0.957243	MITOCHONDRIA
O43674	0.272446	0.589399	0.0709162	0.00790819	0.0118071	0.0104094	0.00676794	0.01166	0.0111818	0.00750359	0.277783	0.474194	0.117527	0.0423736	0.0221196	0.0134139	0.014924	0.0144799	0.0126144	0.0105712	0.346892	0.286007	0.166539	0.0404195	0.0260936	0.0286518	0.0273727	0.0179074	0.0176516	0.0424661	O43674	NADH dehydrogenase [ubiquinone] 1 beta subcomplex subunit 5 mitochondrial OS=Homo sapiens OX=9606 GN=NDUFB5 PE=1 SV=1	MITOCHONDRIA	MITOCHONDRIA	1	MITOCHONDRIA
P40926	0.231443	0.655644	0.0679817	0.0101635	0.00741336	0.00596629	0.00351538	0.00383358	0.00525413	0.00878466	0.305689	0.484306	0.114584	0.0289878	0.0158542	0.0117878	0.0133501	0.0113945	0.00634672	0.00769977	0.361196	0.431254	0.117837	0.0223698	0.0145008	0.0107316	0.00757256	0.0100359	0.00740149	0.017101	P40926	Malate dehydrogenase mitochondrial OS=Homo sapiens OX=9606 GN=MDH2 PE=1 SV=3	MITOCHONDRIA	MITOCHONDRIA	1	MITOCHONDRIA
O95299	0.22577	0.619836	0.080302	0.0218396	0.0131602	0.0110786	0.00613908	0.00730339	0.00599795	0.00857355	0.322135	0.487225	0.105098	0.0275543	0.0133997	0.0100734	0.010498	0.00901177	0.00655831	0.00844559	0.348507	0.466109	0.101823	0.0179902	0.0181113	0.0145375	0.0080865	0.0105094	0.00611788	0.00820764	O95299	NADH dehydrogenase [ubiquinone] 1 alpha subcomplex subunit 10 mitochondrial OS=Homo sapiens OX=9606 GN=NDUFA10 PE=1 SV=1	MITOCHONDRIA	MITOCHONDRIA	1	MITOCHONDRIA
Q96RP9	0.218012	0.635167	0.0693056	0.0242217	0.0115349	0.0087232	0.00548234	0.00715923	0.00823199	0.0121617	0.288811	0.508979	0.116498	0.0272758	0.0124873	0.00994077	0.00829969	0.00965783	0.00718678	0.0108651	0.325125	0.423697	0.111046	0.0334006	0.0210874	0.0172011	0.0111513	0.018403	0.0138624	0.025027	Q96RP9	Elongation factor G mitochondrial OS=Homo sapiens OX=9606 GN=GFM1 PE=1 SV=2	unknown	MITOCHONDRIA	0.951543	MITOCHONDRIA
Q12931	0.287588	0.557451	0.0803851	0.0192818	0.0104735	0.0094827	0.00610566	0.0112309	0.00759965	0.0104009	0.297971	0.508214	0.119815	0.0266997	0.0115202	0.00799636	0.00675237	0.00764785	0.00500499	0.00837875	0.365024	0.421717	0.12618	0.0214784	0.0141773	0.0118325	0.0062057	0.00946265	0.0067513	0.0171719	Q12931	Heat shock protein 75 kDa mitochondrial OS=Homo sapiens OX=9606 GN=TRAP1 PE=1 SV=3	MITOCHONDRIA	MITOCHONDRIA	1	MITOCHONDRIA
P61604	0.302327	0.516635	0.112484	0.010162	0.00912095	0.0101847	0.00743482	0.00948307	0.00953965	0.012629	0.351081	0.493196	0.101835	0.0193681	0.00775743	0.00479098	0.00564582	0.00562669	0.0033556	0.00734276	0.367805	0.447126	0.107851	0.0207738	0.0124206	0.00902536	0.00558412	0.00739379	0.00592307	0.0160974	P61604	10 kDa heat shock protein mitochondrial OS=Homo sapiens OX=9606 GN=HSPE1 PE=1 SV=2	MITOCHONDRIA	MITOCHONDRIA	1	MITOCHONDRIA
O75947	0.277969	0.569401	0.104616	0.0213104	0.00841701	0.00381963	0.00490848	0.00247153	0.00164192	0.00544427	0.328105	0.477227	0.112785	0.0289905	0.012172	0.00889903	0.00881541	0.0108938	0.00568582	0.00642641	0.346126	0.444329	0.122746	0.0252562	0.0161293	0.0104016	0.00837908	0.00931387	0.00720635	0.0101127	O75947	ATP synthase subunit d mitochondrial OS=Homo sapiens OX=9606 GN=ATP5H PE=1 SV=3	MITOCHONDRIA	MITOCHONDRIA	1	MITOCHONDRIA
O43837	0.192245	0.619607	0.0712518	0.0176262	0.01912	0.0145747	0.0105203	0.0190346	0.0199735	0.0160471	0.301242	0.505117	0.119529	0.023946	0.0103454	0.00920827	0.00769214	0.0103677	0.00557401	0.00697866	0.307154	0.39994	0.100928	0.0425621	0.0350195	0.0252619	0.0150853	0.0246633	0.016522	0.0328644	O43837	Isocitrate dehydrogenase [NAD] subunit beta mitochondrial OS=Homo sapiens OX=9606 GN=IDH3B PE=1 SV=2	MITOCHONDRIA	MITOCHONDRIA	1	MITOCHONDRIA
G5EA06	0.299543	0.51888	0.0857303	0.0213743	0.0118642	0.00881078	0.0075754	0.0147079	0.0178546	0.013659	0.302819	0.505881	0.107067	0.0169027	0.0144059	0.0105293	0.0116627	0.013601	0.01048	0.00665265	0.345454	0.419142	0.116673	0.021555	0.0172046	0.0146803	0.00995399	0.020266	0.0184399	0.0166318	G5EA06	28S ribosomal protein S27 mitochondrial OS=Homo sapiens OX=9606 GN=MRPS27 PE=1 SV=1	unknown	MITOCHONDRIA	0.952806	MITOCHONDRIA
P46199	0.214504	0.622991	0.0694685	0.00848785	0.0141739	0.0138443	0.007911	0.0163164	0.0191183	0.013185	0.265846	0.473476	0.100775	0.0452956	0.0226478	0.0115519	0.0250798	0.0217358	0.0179359	0.0156559	0.348883	0.393797	0.12804	0.0297767	0.0156328	0.0186104	0.0191067	0.0129032	0.0119107	0.02134	P46199	Translation initiation factor IF-2 mitochondrial OS=Homo sapiens OX=9606 GN=MTIF2 PE=1 SV=2	MITOCHONDRIA	MITOCHONDRIA	1	MITOCHONDRIA
P42704	0.289586	0.561134	0.0818832	0.0162441	0.0102635	0.00813138	0.0047982	0.00893143	0.0111674	0.00786124	0.302194	0.501939	0.111713	0.0175746	0.0124855	0.0101252	0.00979452	0.0123744	0.00894633	0.012854	0.362323	0.425805	0.112504	0.02	0.0162008	0.0133053	0.00804369	0.0124627	0.0127968	0.0165581	P42704	Leucine-rich PPR motif-containing protein mitochondrial OS=Homo sapiens OX=9606 GN=LRPPRC PE=1 SV=3	unknown	MITOCHONDRIA	0.953939	MITOCHONDRIA
P30048	0.315963	0.512973	0.108355	0.0202487	0.00870018	0.00724863	0.00465592	0.00391645	0.0052128	0.0127262	0.292801	0.483846	0.116484	0.0263543	0.0170302	0.0141884	0.0113258	0.0124563	0.00862918	0.016885	0.362289	0.413772	0.126304	0.0270533	0.013412	0.0119075	0.00799031	0.0102195	0.0069812	0.0200721	P30048	Thioredoxin-dependent peroxide reductase mitochondrial OS=Homo sapiens OX=9606 GN=PRDX3 PE=1 SV=3	MITOCHONDRIA	MITOCHONDRIA	1	MITOCHONDRIA
E9PDF2	0.223768	0.629012	0.0773975	0.0187181	0.00969215	0.00710256	0.00393274	0.00972439	0.0141407	0.00651158	0.292899	0.50853	0.117056	0.0206204	0.0112933	0.00880664	0.00896361	0.0140857	0.0108224	0.00692305	0.340697	0.408804	0.114676	0.021111	0.0219661	0.0221086	0.0130941	0.0169957	0.0207725	0.0197748	E9PDF2	2-oxoglutarate dehydrogenase mitochondrial OS=Homo sapiens OX=9606 GN=OGDH PE=1 SV=1	unknown	MITOCHONDRIA	0.954574	MITOCHONDRIA
P22830	0.186857	0.605272	0.081184	0.0342443	0.0226848	0.0244554	0.0142991	0.0149004	0.0120941	0.00400909	0.289859	0.52225	0.11303	0.0138291	0.00823602	0.0121082	0.0121082	0.0114321	0.0113706	0.0057775	0.298074	0.358078	0.11608	0.0551051	0.0491513	0.0497424	0.0302762	0.0158348	0.0133012	0.0143569	P22830	Ferrochelatase mitochondrial OS=Homo sapiens OX=9606 GN=FECH PE=1 SV=2	MITOCHONDRIA	MITOCHONDRIA	1	MITOCHONDRIA
Q9NX20	0.2153	0.633651	0.0687798	0.0196854	0.0122974	0.00538608	0.00591039	0.0155386	0.0168255	0.00662536	0.281765	0.46454	0.104954	0.0290923	0.0209141	0.016825	0.0162286	0.0311369	0.0224049	0.0121395	0.345945	0.433789	0.105655	0.0288791	0.0185148	0.0165023	0.00965989	0.013383	0.0136848	0.0139867	Q9NX20	39S ribosomal protein L16 mitochondrial OS=Homo sapiens OX=9606 GN=MRPL16 PE=1 SV=1	unknown	MITOCHONDRIA	0.948983	MITOCHONDRIA
O75306	0.282336	0.593507	0.0857553	0.0134721	0.00888211	0.00557103	0.00206724	0.00211979	0.00425711	0.0020322	0.29517	0.506751	0.120181	0.025865	0.0118829	0.0113137	0.00656408	0.00946367	0.00948146	0.00332651	0.351975	0.414862	0.124294	0.0249297	0.016717	0.0158624	0.00862949	0.0141324	0.00975508	0.0188431	O75306	NADH dehydrogenase [ubiquinone] iron-sulfur protein 2 mitochondrial OS=Homo sapiens OX=9606 GN=NDUFS2 PE=1 SV=2	MITOCHONDRIA	MITOCHONDRIA	1	MITOCHONDRIA
Q9HCC0	0.237257	0.632373	0.0712403	0.0133745	0.00799581	0.00774312	0.00494549	0.00669627	0.00873583	0.00963829	0.287662	0.490424	0.111333	0.0311763	0.0181927	0.0108586	0.0123617	0.0143831	0.0101589	0.0134501	0.354054	0.430513	0.113391	0.0142981	0.0135607	0.0133684	0.00968166	0.0132081	0.0155163	0.0224089	Q9HCC0	Methylcrotonoyl-CoA carboxylase beta chain mitochondrial OS=Homo sapiens OX=9606 GN=MCCC2 PE=1 SV=1	unknown	MITOCHONDRIA	0.952318	MITOCHONDRIA
A0A087WVM4	0.250975	0.573563	0.0747573	0.0220159	0.0171319	0.0104787	0.00774186	0.0182206	0.0179938	0.0071219	0.27995	0.486472	0.111994	0.0232679	0.019399	0.0138136	0.0162929	0.0243849	0.0146582	0.00976759	0.326941	0.38573	0.12087	0.0321176	0.0266559	0.0233941	0.019571	0.0283096	0.0182966	0.0181145	A0A087WVM4	Monofunctional C1-tetrahydrofolate synthase mitochondrial OS=Homo sapiens OX=9606 GN=MTHFD1L PE=1 SV=1	unknown	MITOCHONDRIA	0.95984	MITOCHONDRIA
O75489	0.32311	0.511274	0.0938354	0.0219784	0.0124507	0.00690859	0.0056939	0.00812329	0.0110082	0.00561798	0.291021	0.499956	0.113076	0.0271046	0.0150311	0.0116762	0.01225	0.0125811	0.00805633	0.00924822	0.358742	0.45146	0.111044	0.0232922	0.0149263	0.0105627	0.00643996	0.00695155	0.0067108	0.0098706	O75489	NADH dehydrogenase [ubiquinone] iron-sulfur protein 3 mitochondrial OS=Homo sapiens OX=9606 GN=NDUFS3 PE=1 SV=1	MITOCHONDRIA	MITOCHONDRIA	1	MITOCHONDRIA
P53007	0.260061	0.599063	0.0869716	0.0124838	0.011607	0.0102224	0.00426897	0.00459203	0.00641499	0.00431512	0.290262	0.519523	0.128926	0.0195535	0.0120977	0.00874977	0.00883193	0.00745579	0.00207448	0.00252634	0.35458	0.422207	0.135951	0.0281072	0.0140038	0.0108143	0.0102163	0.0111133	0.00707665	0.00593043	P53007	Tricarboxylate transport protein mitochondrial OS=Homo sapiens OX=9606 GN=SLC25A1 PE=1 SV=2	MITOCHONDRIA	MITOCHONDRIA	1	MITOCHONDRIA
P31040	0.256038	0.602575	0.0828192	0.0168617	0.0110508	0.00647148	0.00531826	0.00653866	0.00681856	0.00550859	0.301834	0.513431	0.121758	0.0223208	0.0111736	0.00665916	0.00684451	0.00545443	0.00403786	0.00648706	0.351636	0.432524	0.120721	0.0312887	0.0158625	0.0145535	0.00609447	0.00969767	0.00639005	0.0112318	P31040	Succinate dehydrogenase [ubiquinone] flavoprotein subunit mitochondrial OS=Homo sapiens OX=9606 GN=SDHA PE=1 SV=2	MITOCHONDRIA	MITOCHONDRIA	1	MITOCHONDRIA
P52815	0.289396	0.506551	0.0962623	0.0241481	0.0168097	0.0128485	0.00845564	0.0112234	0.0188665	0.0154385	0.322989	0.465933	0.110094	0.0288155	0.014868	0.0105492	0.0124372	0.0144196	0.0116348	0.00825998	0.358649	0.422654	0.106782	0.0299863	0.0174666	0.0137225	0.00684433	0.0138919	0.0134515	0.0165517	P52815	39S ribosomal protein L12 mitochondrial OS=Homo sapiens OX=9606 GN=MRPL12 PE=1 SV=2	unknown	MITOCHONDRIA	0.950125	MITOCHONDRIA
Q9NVV4	0.228081	0.62928	0.07305	0.0278357	0.0109408	0.00796368	0.00256773	0.00803811	0.00755433	0.0046889	0.280482	0.497722	0.112864	0.0236092	0.0186771	0.0155225	0.0144209	0.0140203	0.0133193	0.00936358	0.314558	0.394524	0.106837	0.0314626	0.0329252	0.0295238	0.0176871	0.0271769	0.0222789	0.0230272	Q9NVV4	Poly(A) RNA polymerase mitochondrial OS=Homo sapiens OX=9606 GN=MTPAP PE=1 SV=1	unknown	MITOCHONDRIA	0.953061	MITOCHONDRIA
P40939	0.209492	0.665664	0.0691118	0.0132086	0.00896343	0.006632	0.00499105	0.00795755	0.00880147	0.00517859	0.291444	0.507253	0.117941	0.0219444	0.0126991	0.00902502	0.0108871	0.0113876	0.00860956	0.00880978	0.342973	0.409501	0.1182	0.0220583	0.0198643	0.0164864	0.0141746	0.0207692	0.0185193	0.0174533	P40939	Trifunctional enzyme subunit alpha mitochondrial OS=Homo sapiens OX=9606 GN=HADHA PE=1 SV=2	MITOCHONDRIA	MITOCHONDRIA	1	MITOCHONDRIA
Q9Y2R9	0.216471	0.621869	0.0631915	0.0145827	0.0151382	0.0111569	0.00837924	0.0142123	0.0202768	0.0147215	0.29887	0.505593	0.118614	0.025295	0.0108792	0.00845731	0.00611233	0.0108792	0.0103602	0.00493984	0.343546	0.411141	0.115553	0.0318783	0.0193329	0.0143008	0.0113751	0.0165243	0.017952	0.0183967	Q9Y2R9	28S ribosomal protein S7 mitochondrial OS=Homo sapiens OX=9606 GN=MRPS7 PE=1 SV=2	unknown	MITOCHONDRIA	0.951672	MITOCHONDRIA
K7EKE6	0.220237	0.64001	0.0672463	0.0163772	0.0125257	0.009762	0.00576006	0.00884532	0.0109455	0.0082912	0.276543	0.493778	0.116209	0.0231386	0.0177073	0.0129782	0.0159117	0.0189251	0.0136716	0.0111382	0.345045	0.415526	0.118313	0.0301616	0.0182593	0.0150417	0.00993559	0.0152101	0.0123473	0.0201599	K7EKE6	Lon protease homolog mitochondrial OS=Homo sapiens OX=9606 GN=LONP1 PE=1 SV=1	unknown	MITOCHONDRIA	0.952321	MITOCHONDRIA
P22695	0.232768	0.620924	0.0698696	0.0205061	0.0107794	0.00971269	0.0055862	0.00934776	0.00941794	0.0110882	0.305884	0.515066	0.117411	0.0238785	0.00998514	0.0067485	0.0057687	0.00691363	0.00440359	0.00394121	0.349499	0.424851	0.111882	0.0254462	0.0169981	0.0159612	0.0111168	0.0121707	0.0109128	0.0211627	P22695	Cytochrome b-c1 complex subunit 2 mitochondrial OS=Homo sapiens OX=9606 GN=UQCRC2 PE=1 SV=3	MITOCHONDRIA	MITOCHONDRIA	1	MITOCHONDRIA
Q9NRK6	0.239784	0.586393	0.0688654	0.0319436	0.0184609	0.0064302	0.00497822	0.0159718	0.00995644	0.0172163	0.272275	0.488489	0.112887	0.0341874	0.0242447	0.0152964	0.0152199	0.0176673	0.00826004	0.0114723	0.30363	0.386178	0.125304	0.0360885	0.0266695	0.024447	0.0220129	0.0189438	0.0161922	0.0405334	Q9NRK6	ATP-binding cassette sub-family B member 10 mitochondrial OS=Homo sapiens OX=9606 GN=ABCB10 PE=1 SV=2	unknown	MITOCHONDRIA	0.953237	MITOCHONDRIA
Q96EY7	0.281835	0.537748	0.0830657	0.0241293	0.0135975	0.0109489	0.00888425	0.0134307	0.0174348	0.00892596	0.28917	0.508692	0.114478	0.0207164	0.0133067	0.00939671	0.00996077	0.0100761	0.0100377	0.0141656	0.364654	0.421992	0.124777	0.0200427	0.0147451	0.00946512	0.00741669	0.010507	0.0137915	0.0126084	Q96EY7	Pentatricopeptide repeat domain-containing protein 3 mitochondrial OS=Homo sapiens OX=9606 GN=PTCD3 PE=1 SV=3	unknown	MITOCHONDRIA	0.952644	MITOCHONDRIA
Q9H5Q4	0.255905	0.568657	0.0891689	0.0310657	0.0122458	0.00812091	0.00509168	0.0121491	0.0111501	0.00644517	0.282697	0.503054	0.106664	0.0177773	0.0196199	0.0153888	0.0137851	0.0152865	0.0150476	0.01068	0.341685	0.426439	0.116489	0.0194183	0.0179539	0.0187563	0.0134604	0.0161685	0.0144032	0.0152257	Q9H5Q4	Dimethyladenosine transferase 2 mitochondrial OS=Homo sapiens OX=9606 GN=TFB2M PE=1 SV=1	unknown	MITOCHONDRIA	0.957226	MITOCHONDRIA
Q00059	0.213045	0.691612	0.048974	0.00729629	0.00908436	0.00684027	0.00486019	0.0051002	0.00685227	0.00633625	0.336018	0.496724	0.0909183	0.0129502	0.0126321	0.0112583	0.011131	0.0123523	0.0105459	0.00547011	0.3786	0.44654	0.102661	0.00890054	0.0123342	0.0126505	0.00670929	0.0114419	0.0104593	0.00970249	Q00059	Transcription factor A mitochondrial OS=Homo sapiens OX=9606 GN=TFAM PE=1 SV=1	MITOCHONDRIA	MITOCHONDRIA	1	MITOCHONDRIA
Q6NVY1	0.199984	0.499361	0.0819166	0.0425144	0.0340603	0.0282771	0.0199624	0.0258152	0.0242707	0.0438383	0.245883	0.413762	0.109217	0.0352355	0.0310652	0.0272352	0.0281076	0.0377037	0.0301289	0.0416613	0.279759	0.298812	0.116827	0.0367021	0.0363991	0.0388452	0.0298576	0.0402814	0.0304747	0.0920413	Q6NVY1	3-hydroxyisobutyryl-CoA hydrolase mitochondrial OS=Homo sapiens OX=9606 GN=HIBCH PE=1 SV=2	MITOCHONDRIA	MITOCHONDRIA	1	MITOCHONDRIA
P13073	0.236891	0.657014	0.0710657	0.00951729	0.00830444	0.00607851	0.00293224	0.00276815	0.00239716	0.00303212	0.300144	0.520371	0.114368	0.0157528	0.0105446	0.00708665	0.00751355	0.00996115	0.00624707	0.00801161	0.351576	0.433378	0.129871	0.0286507	0.0150466	0.00889925	0.00805593	0.00907679	0.00854416	0.00690191	P13073	Cytochrome c oxidase subunit 4 isoform 1 mitochondrial OS=Homo sapiens OX=9606 GN=COX4I1 PE=1 SV=1	MITOCHONDRIA	MITOCHONDRIA	1	MITOCHONDRIA
Q96I99	0.247201	0.6213	0.0689672	0.0182855	0.00997571	0.00674302	0.00395657	0.00645545	0.00712975	0.00998562	0.322021	0.517517	0.102334	0.013131	0.0092744	0.008215	0.00788045	0.00639358	0.00571519	0.00751803	0.34374	0.435644	0.109188	0.0280164	0.0192826	0.0138523	0.0084503	0.0137672	0.00805331	0.0200057	Q96I99	Succinate--CoA ligase [GDP-forming] subunit beta mitochondrial OS=Homo sapiens OX=9606 GN=SUCLG2 PE=1 SV=2	unknown	MITOCHONDRIA	0.949735	MITOCHONDRIA
P24752	0.287471	0.565261	0.0835152	0.0218286	0.00881476	0.00719844	0.00559879	0.00718178	0.00854815	0.00458234	0.341926	0.467603	0.105732	0.0353679	0.0112941	0.00611674	0.00851975	0.0103766	0.00506816	0.00799546	0.325803	0.472549	0.096662	0.0223445	0.0181823	0.0153892	0.00914592	0.0127331	0.0114187	0.0157726	P24752	Acetyl-CoA acetyltransferase mitochondrial OS=Homo sapiens OX=9606 GN=ACAT1 PE=1 SV=1	MITOCHONDRIA	MITOCHONDRIA	1	MITOCHONDRIA
P49748-2	0.2482	0.594435	0.0735235	0.0241458	0.0122423	0.00845841	0.00557812	0.00976606	0.0136412	0.0100093	0.302502	0.51602	0.117429	0.0173899	0.0102726	0.00743755	0.00831534	0.0085941	0.00625133	0.00578871	0.354507	0.438881	0.113775	0.0223062	0.0151953	0.0116536	0.00830432	0.0121265	0.0104217	0.0128305	P49748-2	Isoform 2 of Very long-chain specific acyl-CoA dehydrogenase mitochondrial OS=Homo sapiens OX=9606 GN=ACADVL	unknown	MITOCHONDRIA	0.952595	MITOCHONDRIA
P25705	0.232849	0.664407	0.0660644	0.00979891	0.00598985	0.00509015	0.00312695	0.00419534	0.00425157	0.00422713	0.306623	0.516238	0.115385	0.0166238	0.00840406	0.00730486	0.00746835	0.00960067	0.00626826	0.0060839	0.35839	0.450518	0.114449	0.0162312	0.0138526	0.0120459	0.00787155	0.00936135	0.00641817	0.0108621	P25705	ATP synthase subunit alpha mitochondrial OS=Homo sapiens OX=9606 GN=ATP5F1A PE=1 SV=1	MITOCHONDRIA	MITOCHONDRIA	1	MITOCHONDRIA
P06576	0.354459	0.477295	0.0986717	0.0230931	0.0113329	0.00681218	0.00575967	0.00525866	0.00701025	0.0103076	0.306744	0.51256	0.122393	0.0173727	0.0091799	0.00684298	0.0068898	0.00691711	0.00503275	0.00606661	0.355968	0.422908	0.128849	0.0239989	0.0150612	0.0123587	0.00714539	0.0106462	0.00860641	0.0144584	P06576	ATP synthase subunit beta mitochondrial OS=Homo sapiens OX=9606 GN=ATP5F1B PE=1 SV=3	MITOCHONDRIA	MITOCHONDRIA	1	MITOCHONDRIA
P31937	0.227031	0.587121	0.0851486	0.0361329	0.0154365	0.0125207	0.00878547	0.00678444	0.0087283	0.0123111	0.296396	0.511346	0.122468	0.0270132	0.00962464	0.00607422	0.00511175	0.00577478	0.00427762	0.0119132	0.342307	0.403746	0.125668	0.0405437	0.020539	0.0137421	0.00911196	0.0131782	0.00914164	0.022023	P31937	3-hydroxyisobutyrate dehydrogenase mitochondrial OS=Homo sapiens OX=9606 GN=HIBADH PE=1 SV=2	MITOCHONDRIA	MITOCHONDRIA	1	MITOCHONDRIA
P82663	0.216135	0.600363	0.0760399	0.0276966	0.0193373	0.0103737	0.00513647	0.0142008	0.019438	0.0112801	0.293086	0.483072	0.111564	0.0326331	0.0200897	0.0127473	0.00978992	0.0120334	0.0108097	0.014175	0.343078	0.390151	0.106364	0.0275841	0.0212878	0.0185144	0.0158159	0.0215876	0.0317068	0.0239113	P82663	28S ribosomal protein S25 mitochondrial OS=Homo sapiens OX=9606 GN=MRPS25 PE=1 SV=1	unknown	MITOCHONDRIA	0.956814	MITOCHONDRIA
Q9H9J2	0.216692	0.602375	0.0684665	0.0144721	0.0187553	0.0157051	0.0105133	0.0181063	0.0187553	0.0161594	0.283001	0.485947	0.106125	0.0131808	0.0113394	0.0126963	0.0205466	0.0294631	0.0190928	0.0186083	0.345566	0.392224	0.10573	0.0290587	0.0214188	0.025648	0.0136426	0.0223738	0.0270123	0.0173261	Q9H9J2	39S ribosomal protein L44 mitochondrial OS=Homo sapiens OX=9606 GN=MRPL44 PE=1 SV=1	unknown	MITOCHONDRIA	0.955238	MITOCHONDRIA
P22033	0.231071	0.631756	0.0687375	0.0123701	0.011242	0.00751653	0.00746406	0.0134196	0.0116487	0.0047749	0.286809	0.512966	0.112602	0.0245024	0.013043	0.00919478	0.0100461	0.0143711	0.00805394	0.00841152	0.351599	0.410102	0.109693	0.0225196	0.0216381	0.0167094	0.0122215	0.0190936	0.0139846	0.0224395	P22033	Methylmalonyl-CoA mutase mitochondrial OS=Homo sapiens OX=9606 GN=MUT PE=1 SV=4	MITOCHONDRIA	MITOCHONDRIA	1	MITOCHONDRIA
P13804	0.310086	0.514397	0.0999181	0.0230815	0.00988977	0.00702166	0.00678868	0.00687705	0.00841956	0.0135211	0.317937	0.494724	0.116372	0.0258921	0.0109069	0.0068524	0.00643746	0.00724363	0.00528749	0.00834618	0.364549	0.423404	0.124807	0.0295053	0.0136941	0.008836	0.00586095	0.00772175	0.00621751	0.0154045	P13804	Electron transfer flavoprotein subunit alpha mitochondrial OS=Homo sapiens OX=9606 GN=ETFA PE=1 SV=1	MITOCHONDRIA	MITOCHONDRIA	1	MITOCHONDRIA
O76031	0.213045	0.661897	0.0705285	0.017972	0.00908548	0.0046588	0.00595199	0.00639963	0.00744413	0.00301744	0.288217	0.498452	0.109193	0.0197751	0.0157341	0.0132923	0.0135502	0.0175224	0.0138598	0.0104034	0.332338	0.421576	0.112331	0.03357	0.0205643	0.0150097	0.00981816	0.0154401	0.014001	0.0253524	O76031	ATP-dependent Clp protease ATP-binding subunit clpX-like mitochondrial OS=Homo sapiens OX=9606 GN=CLPX PE=1 SV=2	MITOCHONDRIA	MITOCHONDRIA	1	MITOCHONDRIA
P10515	0.247159	0.540412	0.0973277	0.0249616	0.0127368	0.0124296	0.00968568	0.023733	0.0248592	0.00669602	0.300247	0.490638	0.11533	0.0199585	0.0119442	0.00969852	0.0123091	0.0179935	0.0132495	0.00863182	0.321777	0.384823	0.116259	0.025277	0.020306	0.019132	0.0132805	0.0390161	0.0353291	0.0248001	P10515	Dihydrolipoyllysine-residue acetyltransferase component of pyruvate dehydrogenase complex mitochondrial OS=Homo sapiens OX=9606 GN=DLAT PE=1 SV=3	MITOCHONDRIA	MITOCHONDRIA	1	MITOCHONDRIA
P48735	0.218706	0.644106	0.0745544	0.0208123	0.00954717	0.00685875	0.00321299	0.00486538	0.00624238	0.0110946	0.283119	0.492002	0.111691	0.0211216	0.0136495	0.0122468	0.0156996	0.0165223	0.0116263	0.022322	0.363257	0.415343	0.119917	0.0233786	0.0146576	0.0119053	0.00748884	0.0106252	0.00796889	0.0254589	P48735	Isocitrate dehydrogenase [NADP] mitochondrial OS=Homo sapiens OX=9606 GN=IDH2 PE=1 SV=2	MITOCHONDRIA	MITOCHONDRIA	1	MITOCHONDRIA
P43897	0.222168	0.648942	0.0751535	0.00393099	0.00759087	0.00958541	0.0052284	0.0117542	0.0101082	0.00553824	0.311668	0.50901	0.107515	0.0235943	0.012445	0.00560477	0.00946182	0.0100645	0.0072621	0.00337492	0.342636	0.450694	0.0940646	0.0239826	0.0159754	0.0200956	0.0154313	0.0179189	0.0110779	0.00812376	P43897	Elongation factor Ts mitochondrial OS=Homo sapiens OX=9606 GN=TSFM PE=1 SV=2	MITOCHONDRIA	MITOCHONDRIA	1	MITOCHONDRIA
P55809	0.215129	0.63023	0.0751348	0.0187352	0.0110684	0.00918256	0.00523459	0.00816032	0.0105749	0.0165498	0.306406	0.497633	0.114988	0.0243238	0.0130864	0.00867112	0.0080176	0.0100897	0.00492532	0.011859	0.355584	0.423434	0.119172	0.0270659	0.0156777	0.0135124	0.00853776	0.0112512	0.00667398	0.01909	P55809	Succinyl-CoA:3-ketoacid coenzyme A transferase 1 mitochondrial OS=Homo sapiens OX=9606 GN=OXCT1 PE=1 SV=1	MITOCHONDRIA	MITOCHONDRIA	1	MITOCHONDRIA
P36542	0.208835	0.672497	0.0729745	0.00855834	0.00813835	0.00715839	0.00433983	0.00626242	0.00626242	0.00497447	0.297512	0.527486	0.125096	0.0136408	0.00701234	0.00630854	0.00621897	0.0064621	0.00353176	0.00673082	0.350401	0.462541	0.120647	0.0161748	0.0119424	0.00931568	0.00585952	0.0084224	0.00761419	0.00708247	P36542	ATP synthase subunit gamma mitochondrial OS=Homo sapiens OX=9606 GN=ATP5F1C PE=1 SV=1	MITOCHONDRIA	MITOCHONDRIA	1	MITOCHONDRIA
P11177	0.302218	0.498086	0.0922342	0.0136668	0.0111696	0.0114546	0.0109796	0.0255558	0.0251758	0.00945957	0.309322	0.481798	0.107535	0.0219915	0.0133269	0.0123024	0.0139433	0.0179544	0.0137002	0.00812634	0.344949	0.406835	0.114019	0.0260949	0.017516	0.0133912	0.00953854	0.0252642	0.0234024	0.0189911	P11177	Pyruvate dehydrogenase E1 component subunit beta mitochondrial OS=Homo sapiens OX=9606 GN=PDHB PE=1 SV=3	MITOCHONDRIA	MITOCHONDRIA	1	MITOCHONDRIA
Q16740	0.267551	0.558552	0.10123	0.0258142	0.00940893	0.00617612	0.00400483	0.00718938	0.00998794	0.0100844	0.305137	0.507777	0.105066	0.0154121	0.0158402	0.0119515	0.0113093	0.0090974	0.00781306	0.0105958	0.328916	0.403968	0.1242	0.0425604	0.0221224	0.0187909	0.0122029	0.017668	0.0109302	0.0186412	Q16740	ATP-dependent Clp protease proteolytic subunit mitochondrial OS=Homo sapiens OX=9606 GN=CLPP PE=1 SV=1	MITOCHONDRIA	MITOCHONDRIA	1	MITOCHONDRIA
P31930	0.31899	0.488675	0.0954877	0.027212	0.0158187	0.0113932	0.00907065	0.0109015	0.0103993	0.0120524	0.320762	0.483613	0.111082	0.0272471	0.0126045	0.00952539	0.0102564	0.0100903	0.00788614	0.0069336	0.351706	0.428342	0.123057	0.0275864	0.0183818	0.012218	0.00846494	0.010273	0.00620488	0.0137658	P31930	Cytochrome b-c1 complex subunit 1 mitochondrial OS=Homo sapiens OX=9606 GN=UQCRC1 PE=1 SV=3	MITOCHONDRIA	MITOCHONDRIA	1	MITOCHONDRIA
P49406	0.23215	0.626991	0.0617045	0.0171963	0.010537	0.00708084	0.00354042	0.0115485	0.0166906	0.0125601	0.29605	0.518947	0.110451	0.0138465	0.0107059	0.00884895	0.00804658	0.011875	0.0128379	0.00839045	0.342583	0.413878	0.110346	0.0239407	0.0174188	0.0162035	0.00891193	0.0218747	0.0281941	0.0166491	P49406	39S ribosomal protein L19 mitochondrial OS=Homo sapiens OX=9606 GN=MRPL19 PE=1 SV=2	unknown	MITOCHONDRIA	0.95027	MITOCHONDRIA
Q9BYD1	0.227163	0.620106	0.0578028	0.0215089	0.0114594	0.00791671	0.0083505	0.0165203	0.0220511	0.00712143	0.309495	0.508041	0.10459	0.013598	0.0136514	0.00822825	0.010873	0.0122355	0.010125	0.00916328	0.359883	0.376573	0.128279	0.0237584	0.0172072	0.0112268	0.00815505	0.0253894	0.0297931	0.0197352	Q9BYD1	39S ribosomal protein L13 mitochondrial OS=Homo sapiens OX=9606 GN=MRPL13 PE=1 SV=1	unknown	MITOCHONDRIA	0.94618	MITOCHONDRIA
P83111	0.209965	0.582873	0.0644609	0.0278708	0.0215648	0.0106656	0.0137018	0.0202413	0.0332425	0.0154146	0.273971	0.483197	0.107522	0.0158723	0.0213182	0.018572	0.0207596	0.0236455	0.0145224	0.02062	0.307769	0.407136	0.0890297	0.0216739	0.0383461	0.0230077	0.0156719	0.0460153	0.0356786	0.0156719	P83111	Serine beta-lactamase-like protein LACTB mitochondrial OS=Homo sapiens OX=9606 GN=LACTB PE=1 SV=2	MITOCHONDRIA	MITOCHONDRIA	1	MITOCHONDRIA
Q9H845	0.284231	0.518632	0.0772071	0.022862	0.0184044	0.0110191	0.0148441	0.0262604	0.0215085	0.00503141	0.311566	0.539503	0.107745	0.00630129	0.00563043	0.00625337	0.00616951	0.00656484	0.00548667	0.00477987	0.344734	0.415396	0.114427	0.0272077	0.0263254	0.022128	0.012022	0.0137509	0.0102485	0.0137598	Q9H845	Acyl-CoA dehydrogenase family member 9 mitochondrial OS=Homo sapiens OX=9606 GN=ACAD9 PE=1 SV=1	MITOCHONDRIA	MITOCHONDRIA	1	MITOCHONDRIA
Q9Y697	0.217579	0.617931	0.0724584	0.021439	0.0127209	0.00932867	0.0090573	0.01574	0.0146545	0.00909122	0.254186	0.456014	0.0963695	0.0253017	0.0276936	0.0201456	0.0248764	0.0458725	0.0224313	0.0271089	0.332735	0.389079	0.115222	0.029716	0.0216141	0.0213765	0.0158609	0.0229072	0.0219308	0.0295577	Q9Y697	Cysteine desulfurase mitochondrial OS=Homo sapiens OX=9606 GN=NFS1 PE=1 SV=3	unknown	MITOCHONDRIA	0.947861	MITOCHONDRIA
Q9HAV7	0.266095	0.540378	0.0876089	0.022526	0.015357	0.0119483	0.00878549	0.0113509	0.0192227	0.0167276	0.323605	0.485493	0.104063	0.0198045	0.0138751	0.00864632	0.0109873	0.0118588	0.00943235	0.0122347	0.381842	0.413622	0.111757	0.0217791	0.0127722	0.0103925	0.00716932	0.0104226	0.00991053	0.0203332	Q9HAV7	GrpE protein homolog 1 mitochondrial OS=Homo sapiens OX=9606 GN=GRPEL1 PE=1 SV=2	unknown	MITOCHONDRIA	0.95357	MITOCHONDRIA
Q16822	0.228548	0.57976	0.0768393	0.0319874	0.0174772	0.0120996	0.00829818	0.0110797	0.0155996	0.0183116	0.288171	0.493805	0.107527	0.0253156	0.0178439	0.0119733	0.0129014	0.0139456	0.0102562	0.0182616	0.345362	0.405896	0.117794	0.023847	0.0203354	0.0220388	0.0107966	0.0148323	0.0113994	0.0276992	Q16822	Phosphoenolpyruvate carboxykinase [GTP] mitochondrial OS=Homo sapiens OX=9606 GN=PCK2 PE=1 SV=4	MITOCHONDRIA	MITOCHONDRIA	1	MITOCHONDRIA
Q9UMS0	0.279898	0.482931	0.0986031	0.0203182	0.0179278	0.0134459	0.0129977	0.0180025	0.030552	0.0253231	0.312872	0.47199	0.103223	0.0215014	0.0179663	0.0115617	0.0153046	0.0165523	0.0121439	0.016885	0.351828	0.384647	0.109829	0.0170593	0.0240455	0.0229082	0.0121852	0.0233956	0.0220146	0.0320877	Q9UMS0	NFU1 iron-sulfur cluster scaffold homolog mitochondrial OS=Homo sapiens OX=9606 GN=NFU1 PE=1 SV=2	unknown	MITOCHONDRIA	0.950357	MITOCHONDRIA
Q9P2R7	0.245792	0.600171	0.0722721	0.015868	0.0112895	0.0104235	0.00808555	0.0137573	0.0129239	0.00941691	0.295782	0.518455	0.111118	0.0127019	0.0120892	0.010747	0.00922981	0.010572	0.00671082	0.0125949	0.366187	0.430765	0.110094	0.0125629	0.0134744	0.0148714	0.008798	0.012236	0.0106606	0.0203503	Q9P2R7	Succinate--CoA ligase [ADP-forming] subunit beta mitochondrial OS=Homo sapiens OX=9606 GN=SUCLA2 PE=1 SV=3	unknown	MITOCHONDRIA	0.953327	MITOCHONDRIA
P04179	0.224486	0.624014	0.0776115	0.0186166	0.0115168	0.0077704	0.00809417	0.00668347	0.00830231	0.0129044	0.287454	0.515231	0.114511	0.0263891	0.0103184	0.0081836	0.0082429	0.00875684	0.00640455	0.0145091	0.329056	0.401024	0.108504	0.0380241	0.0225405	0.0184612	0.0122082	0.0204562	0.0162577	0.0334683	P04179	Superoxide dismutase [Mn] mitochondrial OS=Homo sapiens OX=9606 GN=SOD2 PE=1 SV=3	MITOCHONDRIA	MITOCHONDRIA	1	MITOCHONDRIA
Q9BX68	0.250471	0.556317	0.0921643	0.0356298	0.0112007	0.00709699	0.00849708	0.00772462	0.0108627	0.0200357	0.298091	0.466513	0.11273	0.0376466	0.0243596	0.0157709	0.0147534	0.0095164	0.00945655	0.0111623	0.358045	0.40688	0.127793	0.0249609	0.0195612	0.0146709	0.0107994	0.0133804	0.00719962	0.0167086	Q9BX68	Histidine triad nucleotide-binding protein 2 mitochondrial OS=Homo sapiens OX=9606 GN=HINT2 PE=1 SV=1	unknown	MITOCHONDRIA	0.954478	MITOCHONDRIA
P36551	0.207172	0.589569	0.0806755	0.0284964	0.0184313	0.016269	0.00816022	0.0116354	0.0188432	0.0207481	0.267552	0.432407	0.102609	0.0239116	0.0257329	0.0228835	0.0244698	0.0334587	0.0284648	0.0385113	0.301792	0.358646	0.0925254	0.0223161	0.0275336	0.0296603	0.0214938	0.0395565	0.037203	0.0692735	P36551	Oxygen-dependent coproporphyrinogen-III oxidase mitochondrial OS=Homo sapiens OX=9606 GN=CPOX PE=1 SV=3	MITOCHONDRIA	MITOCHONDRIA	1	MITOCHONDRIA
O95571	0.273718	0.492306	0.0919722	0.0417656	0.0147718	0.0138926	0.0111668	0.0141563	0.0180251	0.0282247	0.28128	0.474184	0.119259	0.0375356	0.0201932	0.0218562	0.00989864	0.010453	0.0116408	0.0136997	0.32289	0.392016	0.124328	0.0418193	0.0256793	0.0195307	0.0117546	0.0144672	0.0104887	0.037027	O95571	Persulfide dioxygenase ETHE1 mitochondrial OS=Homo sapiens OX=9606 GN=ETHE1 PE=1 SV=2	unknown	MITOCHONDRIA	0.94885	MITOCHONDRIA
Q6P1L8	0.23044	0.662189	0.0654802	0.00803112	0.0052608	0.00332998	0.00355384	0.008227	0.0100179	0.00346989	0.31987	0.489329	0.104625	0.0195421	0.011041	0.00984162	0.014004	0.0165791	0.00913612	0.00603196	0.348325	0.401217	0.106318	0.0212162	0.0212162	0.0244666	0.0131198	0.0241711	0.0244666	0.0154837	Q6P1L8	39S ribosomal protein L14 mitochondrial OS=Homo sapiens OX=9606 GN=MRPL14 PE=1 SV=1	unknown	MITOCHONDRIA	0.946968	MITOCHONDRIA
P00505	0.269642	0.605293	0.0691817	0.00914054	0.0114738	0.00842439	0.00596792	0.0056907	0.00656086	0.00862461	0.305176	0.514707	0.110663	0.0109525	0.0108045	0.01001	0.0107188	0.0124794	0.00717446	0.00731468	0.359009	0.433321	0.109328	0.0198318	0.0157656	0.0131966	0.00727329	0.0139821	0.00913866	0.0191527	P00505	Aspartate aminotransferase mitochondrial OS=Homo sapiens OX=9606 GN=GOT2 PE=1 SV=3	MITOCHONDRIA	MITOCHONDRIA	1	MITOCHONDRIA
Q5JRX3	0.219216	0.624754	0.0729863	0.0225261	0.0132012	0.00906738	0.00603136	0.0104498	0.011995	0.00977216	0.261072	0.464928	0.110918	0.0270574	0.0209683	0.0175298	0.0213059	0.02717	0.0228438	0.0262072	0.319485	0.373784	0.11678	0.0300428	0.0292318	0.0286051	0.0223754	0.024882	0.0197582	0.035056	Q5JRX3	Presequence protease mitochondrial OS=Homo sapiens OX=9606 GN=PITRM1 PE=1 SV=3	MITOCHONDRIA	MITOCHONDRIA	1	MITOCHONDRIA
Q16795	0.196902	0.514247	0.0768934	0.0437185	0.0319685	0.0300142	0.0279152	0.0508601	0.0234516	0.00402924	0.280308	0.487342	0.119131	0.0317975	0.0170156	0.0122854	0.0105335	0.0164462	0.0113875	0.0137526	0.34778	0.419112	0.116416	0.0321211	0.0194562	0.0147987	0.0104394	0.0139498	0.0104853	0.0154411	Q16795	NADH dehydrogenase [ubiquinone] 1 alpha subcomplex subunit 9 mitochondrial OS=Homo sapiens OX=9606 GN=NDUFA9 PE=1 SV=2	MITOCHONDRIA	MITOCHONDRIA	1	MITOCHONDRIA
O60313-2	0.213073	0.602366	0.0824488	0.0322004	0.0171616	0.0120868	0.00817698	0.011372	0.0129302	0.00818412	0.262632	0.4951	0.136432	0.0412607	0.0174714	0.0111103	0.0104339	0.0107937	0.00663453	0.00813125	0.329965	0.427655	0.129426	0.0295506	0.0210805	0.015753	0.0115229	0.0134683	0.00899885	0.0125804	O60313-2	Isoform 2 of Dynamin-like 120 kDa protein mitochondrial OS=Homo sapiens OX=9606 GN=OPA1	MITOCHONDRIA	MITOCHONDRIA	1	MITOCHONDRIA
P13995	0.23864	0.644495	0.0653069	0.0120113	0.0101605	0.00611898	0.00511804	0.00496695	0.00485364	0.00832861	0.320976	0.475163	0.113483	0.039455	0.0137951	0.00811808	0.00817485	0.00539313	0.00425773	0.0111837	0.373783	0.428327	0.110141	0.0241717	0.0157478	0.00931299	0.00634126	0.00849401	0.00692624	0.016754	P13995	Bifunctional methylenetetrahydrofolate dehydrogenase/cyclohydrolase mitochondrial OS=Homo sapiens OX=9606 GN=MTHFD2 PE=1 SV=2	MITOCHONDRIA	MITOCHONDRIA	1	MITOCHONDRIA
Q9H9P8	0.253876	0.549798	0.0763432	0.0278191	0.0209174	0.0117859	0.0073264	0.0150775	0.0189	0.0181567	0.268682	0.492299	0.123503	0.0233885	0.0185396	0.019015	0.0159726	0.0160677	0.0118844	0.0106484	0.319215	0.396849	0.151778	0.0285822	0.0169795	0.0191491	0.0133006	0.0153759	0.0168852	0.0218847	Q9H9P8	L-2-hydroxyglutarate dehydrogenase mitochondrial OS=Homo sapiens OX=9606 GN=L2HGDH PE=1 SV=3	unknown	MITOCHONDRIA	0.947809	MITOCHONDRIA
P30049	0.327259	0.546574	0.0960277	0.00608601	0.00630466	0.00335277	0.00138484	0.00335277	0.00306122	0.00659621	0.344727	0.508793	0.104785	0.0080885	0.00610552	0.00365287	0.00641862	0.00756666	0.00459218	0.00527057	0.380833	0.451933	0.111706	0.00881234	0.0109654	0.0112658	0.00440617	0.00595834	0.00255358	0.0115662	P30049	ATP synthase subunit delta mitochondrial OS=Homo sapiens OX=9606 GN=ATP5F1D PE=1 SV=2	MITOCHONDRIA	MITOCHONDRIA	1	MITOCHONDRIA
Q9NUJ1	0.212281	0.624645	0.0731434	0.0277573	0.0128973	0.00746504	0.00606315	0.014895	0.010409	0.010444	0.308135	0.518555	0.112777	0.0154861	0.00793707	0.00670241	0.00836038	0.00754903	0.0049739	0.00952448	0.349996	0.375436	0.116337	0.0336225	0.0229366	0.0201645	0.00974694	0.0185102	0.0201645	0.0330859	Q9NUJ1	Mycophenolic acid acyl-glucuronide esterase mitochondrial OS=Homo sapiens OX=9606 GN=ABHD10 PE=1 SV=1	MITOCHONDRIA	MITOCHONDRIA	1	MITOCHONDRIA
P56385	0.271106	0.60885	0.0716079	0.00784601	0.00742756	0.0062245	0.00507375	0.00475991	0.00873522	0.00836908	0.294236	0.463687	0.12527	0.0332936	0.0161062	0.0149504	0.0148758	0.016218	0.0104765	0.0108866	0.355759	0.385991	0.0996381	0.0223547	0.0263998	0.0146902	0.0119225	0.0270385	0.0208644	0.0353417	P56385	ATP synthase subunit e mitochondrial OS=Homo sapiens OX=9606 GN=ATP5I PE=1 SV=2	unknown	MITOCHONDRIA	0.952321	MITOCHONDRIA
Q8N983-4	0.236189	0.651777	0.06143	0.00165444	0.00668968	0.00496331	0.00298518	0.0119407	0.0183787	0.00399223	0.294325	0.476139	0.118613	0.0380494	0.0138407	0.00880544	0.0113354	0.0159986	0.0140887	0.00880544	0.344516	0.394425	0.122507	0.0272748	0.0203702	0.0148694	0.008595	0.020714	0.0293949	0.0173333	Q8N983-4	Isoform 4 of 39S ribosomal protein L43 mitochondrial OS=Homo sapiens OX=9606 GN=MRPL43	unknown	MITOCHONDRIA	0.945555	MITOCHONDRIA
P04181	0.259874	0.593644	0.0792609	0.0222177	0.00967289	0.00656431	0.00517571	0.00501791	0.0078109	0.0107617	0.296284	0.519708	0.114537	0.0184035	0.0101436	0.00897155	0.00726933	0.00996219	0.00629264	0.0084274	0.359041	0.407746	0.121179	0.0258743	0.0151845	0.0140549	0.00947693	0.0125566	0.0104639	0.0244236	P04181	Ornithine aminotransferase mitochondrial OS=Homo sapiens OX=9606 GN=OAT PE=1 SV=1	MITOCHONDRIA	MITOCHONDRIA	1	MITOCHONDRIA
Q00325	0.273515	0.557892	0.0974026	0.017499	0.0133451	0.0100984	0.00608766	0.00608766	0.00766329	0.0104087	0.289223	0.505823	0.122696	0.0138525	0.0143302	0.0125513	0.0114971	0.0110688	0.00591326	0.0130454	0.311346	0.351736	0.1202	0.0306861	0.0327581	0.0280896	0.0214803	0.0301616	0.0224245	0.0511173	Q00325	Phosphate carrier protein mitochondrial OS=Homo sapiens OX=9606 GN=SLC25A3 PE=1 SV=2	MITOCHONDRIA	MITOCHONDRIA	1	MITOCHONDRIA
P50213	0.344589	0.523575	0.0810322	0.00742251	0.00749942	0.00811476	0.00661488	0.00934543	0.00573033	0.00607646	0.294662	0.486017	0.109518	0.00747102	0.0125376	0.0145985	0.018377	0.0310291	0.0182625	0.00752827	0.377353	0.418389	0.1249	0.015921	0.012959	0.00968837	0.00512188	0.0107374	0.0075594	0.0173712	P50213	Isocitrate dehydrogenase [NAD] subunit alpha mitochondrial OS=Homo sapiens OX=9606 GN=IDH3A PE=1 SV=1	MITOCHONDRIA	MITOCHONDRIA	1	MITOCHONDRIA
Q9BYC9	0.198865	0.558298	0.0907801	0.0320567	0.0278014	0.0139007	0.0093617	0.0207092	0.0312057	0.0170213	0.272141	0.486846	0.117598	0.0240541	0.0233728	0.0131014	0.0147259	0.017451	0.0148307	0.0158788	0.313933	0.391628	0.103498	0.0361239	0.0361239	0.0278096	0.0212156	0.0212156	0.0232225	0.0252294	Q9BYC9	39S ribosomal protein L20 mitochondrial OS=Homo sapiens OX=9606 GN=MRPL20 PE=1 SV=1	unknown	MITOCHONDRIA	0.949188	MITOCHONDRIA
P30837	0.313545	0.502327	0.101284	0.025894	0.0143467	0.00761075	0.00647351	0.00873049	0.00601862	0.0137693	0.310518	0.500341	0.111876	0.018026	0.00877275	0.00832326	0.00832326	0.0117487	0.00816826	0.0139031	0.334897	0.415583	0.113599	0.0210261	0.0153059	0.0146132	0.00967511	0.0169594	0.0209814	0.0373598	P30837	Aldehyde dehydrogenase X mitochondrial OS=Homo sapiens OX=9606 GN=ALDH1B1 PE=1 SV=3	MITOCHONDRIA	MITOCHONDRIA	1	MITOCHONDRIA
P30084	0.34352	0.525645	0.0784774	0.0109174	0.00851287	0.00480909	0.00457639	0.0066125	0.00835773	0.00857104	0.315668	0.482906	0.0986898	0.0170246	0.0164819	0.0141716	0.0135824	0.0130243	0.0100783	0.0183735	0.348444	0.409882	0.10387	0.0181092	0.0211162	0.0201406	0.0139795	0.0190313	0.011066	0.0343606	P30084	Enoyl-CoA hydratase mitochondrial OS=Homo sapiens OX=9606 GN=ECHS1 PE=1 SV=4	MITOCHONDRIA	MITOCHONDRIA	1	MITOCHONDRIA
Q96A35	0.195893	0.596676	0.0711587	0.0304279	0.0243149	0.014012	0.0105776	0.0120887	0.0173776	0.0274744	0.272441	0.490333	0.112463	0.026368	0.0184706	0.0133351	0.0198515	0.0178664	0.0171327	0.0117383	0.335163	0.418039	0.109236	0.0310361	0.0213458	0.0161957	0.00616657	0.0195162	0.027038	0.0162635	Q96A35	39S ribosomal protein L24 mitochondrial OS=Homo sapiens OX=9606 GN=MRPL24 PE=1 SV=1	unknown	MITOCHONDRIA	0.950137	MITOCHONDRIA
A0A024QZ33	0.0286649	0.0929918	0.0349848	0.0810292	0.0876876	0.0679382	0.0685024	0.220743	0.275251	0.0422074	0.0484694	0.042517	0.0612245	0.039966	0.0858844	0.116497	0.107993	0.211735	0.204082	0.0816327	0.0307181	0.0406808	0.0352844	0.0427563	0.0917393	0.09423	0.0855127	0.222084	0.276878	0.0801162	A0A024QZ33	Coiled-coil domain containing 55 isoform CRA_a OS=Homo sapiens OX=9606 GN=NSRP1 PE=1 SV=1	unknown	NUCLEUS	0.870061	NUCLEUS
Q9ULH1	0.044596	0.109803	0.0520286	0.0886257	0.0927431	0.0754474	0.0877762	0.229339	0.205377	0.0142636	0.0596835	0.0724105	0.064233	0.0662039	0.0804899	0.0767051	0.124907	0.259834	0.165647	0.0298859	0.0653954	0.0635201	0.05315	0.0582933	0.0838424	0.0977125	0.107321	0.238474	0.202898	0.0293927	Q9ULH1	Arf-GAP with SH3 domain ANK repeat and PH domain-containing protein 1 OS=Homo sapiens OX=9606 GN=ASAP1 PE=1 SV=4	unknown	NUCLEUS	0.961093	NUCLEUS
Q8IZL8	0.0757416	0.0717068	0.0337804	0.0535088	0.0701486	0.0643608	0.0952474	0.296038	0.219795	0.0196728	0.0916071	0.0427895	0.0377977	0.0444393	0.0668599	0.0656331	0.127988	0.316765	0.17321	0.0329117	0.0781515	0.0465624	0.0350901	0.0424959	0.0713382	0.085665	0.0899739	0.292274	0.226564	0.0318854	Q8IZL8	Proline- glutamic acid- and leucine-rich protein 1 OS=Homo sapiens OX=9606 GN=PELP1 PE=1 SV=2	unknown	NUCLEUS	0.949705	NUCLEUS
Q01970	0.0620753	0.124366	0.0587464	0.102356	0.102924	0.0815791	0.0763311	0.185971	0.161278	0.0443731	0.085672	0.0750646	0.074281	0.0808109	0.099704	0.0866152	0.119947	0.180863	0.141336	0.0557071	0.0805469	0.0760985	0.070155	0.0836585	0.0940383	0.103786	0.0924461	0.176542	0.146193	0.076536	Q01970	1-phosphatidylinositol 45-bisphosphate phosphodiesterase beta-3 OS=Homo sapiens OX=9606 GN=PLCB3 PE=1 SV=2	unknown	NUCLEUS	0.947643	NUCLEUS
Q96P47	0.0397593	0.0928504	0.0522652	0.0945021	0.0996933	0.0784568	0.0852997	0.195611	0.190892	0.0706701	0.0471869	0.0707804	0.073049	0.0852995	0.106624	0.092559	0.16833	0.189655	0.12931	0.0372051	0.0517241	0.0597701	0.0712644	0.0563218	0.0758621	0.113793	0.122989	0.141379	0.134483	0.172414	Q96P47	Arf-GAP with GTPase ANK repeat and PH domain-containing protein 3 OS=Homo sapiens OX=9606 GN=AGAP3 PE=1 SV=2	unknown	NUCLEUS	0.866261	NUCLEUS
H3BPE1	0.103457	0.130398	0.0481859	0.070635	0.080708	0.063631	0.0687032	0.196027	0.197007	0.0412485	0.104035	0.0927414	0.0622896	0.060319	0.0752375	0.0729776	0.103143	0.20791	0.170088	0.0512582	0.108031	0.0911515	0.0595614	0.0601739	0.0755419	0.0890387	0.0784413	0.177339	0.184067	0.0766544	H3BPE1	Microtubule-actin cross-linking factor 1 isoforms 1/2/3/5 OS=Homo sapiens OX=9606 GN=MACF1 PE=1 SV=1	unknown	NUCLEUS	0.95946	NUCLEUS
Q9H7N4	0.0737385	0.0921731	0.0399938	0.065068	0.0835026	0.0786596	0.0960787	0.226683	0.220278	0.0238244	0.0715505	0.0454247	0.0376351	0.0493195	0.0691436	0.074395	0.118988	0.304144	0.197759	0.0316398	0.0602983	0.0432014	0.0363167	0.0495123	0.0839931	0.09214	0.102295	0.247217	0.228112	0.0569134	Q9H7N4	Splicing factor arginine/serine-rich 19 OS=Homo sapiens OX=9606 GN=SCAF1 PE=1 SV=3	NUCLEUS	NUCLEUS	1	NUCLEUS
Q6KB66	0.109594	0.162054	0.072201	0.0902192	0.0995674	0.0824291	0.0812743	0.138188	0.121398	0.043075	0.124122	0.0966463	0.0775985	0.0756504	0.100881	0.105318	0.124109	0.143576	0.104844	0.0472544	0.0874968	0.0786616	0.0716464	0.0680785	0.0988031	0.119776	0.0941142	0.156877	0.129431	0.0951147	Q6KB66	Keratin type II cytoskeletal 80 OS=Homo sapiens OX=9606 GN=KRT80 PE=1 SV=2	unknown	NUCLEUS	0.894707	NUCLEUS
O43150	0.0408946	0.104243	0.0512805	0.085861	0.0926472	0.0872772	0.0854479	0.221527	0.192877	0.0379441	0.0630161	0.0724042	0.0657163	0.0685108	0.0821376	0.0921222	0.134227	0.229866	0.153757	0.038243	0.0360335	0.03976	0.0509711	0.0567188	0.0884889	0.1063	0.0971735	0.22678	0.208779	0.0889942	O43150	Arf-GAP with SH3 domain ANK repeat and PH domain-containing protein 2 OS=Homo sapiens OX=9606 GN=ASAP2 PE=1 SV=3	unknown	NUCLEUS	0.959074	NUCLEUS
M0R2P6	0.0704225	0.140079	0.0549966	0.0991664	0.0915972	0.0663026	0.0721472	0.223915	0.175913	0.00546134	0.0823706	0.096393	0.074257	0.0766382	0.0828997	0.0674663	0.102743	0.245789	0.144634	0.0268101	0.0789503	0.0714685	0.0766052	0.0757119	0.0987158	0.102178	0.112004	0.215522	0.140257	0.0285874	M0R2P6	SH3KBP1 binding protein 1 isoform CRA_c OS=Homo sapiens OX=9606 GN=SHKBP1 PE=1 SV=1	unknown	NUCLEUS	0.944293	NUCLEUS
E7EUN2	0.0283316	0.0849948	0.0514166	0.0535152	0.0996852	0.0734523	0.0865687	0.236097	0.24659	0.0393494	0.0459472	0.0546763	0.0617746	0.0707914	0.0834532	0.0788489	0.131223	0.251607	0.185516	0.0361631	0.0420737	0.0562559	0.0486921	0.0587772	0.0928144	0.110936	0.0958084	0.187205	0.163095	0.144343	E7EUN2	Arf-GAP with GTPase ANK repeat and PH domain-containing protein 1 OS=Homo sapiens OX=9606 GN=AGAP1 PE=1 SV=1	unknown	NUCLEUS	0.952321	NUCLEUS
P17858	0.0305615	0.0695111	0.0458364	0.0717869	0.0813306	0.0764098	0.0787213	0.229861	0.243337	0.0726447	0.0395522	0.051909	0.0607652	0.0610917	0.0782685	0.0769492	0.122497	0.237091	0.193634	0.0782424	0.0354125	0.0424507	0.0520409	0.0537846	0.0704763	0.0874534	0.0669097	0.170294	0.222541	0.198637	P17858	ATP-dependent 6-phosphofructokinase liver type OS=Homo sapiens OX=9606 GN=PFKL PE=1 SV=6	unknown	NUCLEUS	0.892259	NUCLEUS
P23246	0.21157	0.162236	0.026832	0.0660187	0.0845158	0.0901871	0.0993162	0.155341	0.0994146	0.00456804	0.272705	0.0670145	0.0286872	0.0479588	0.0801963	0.081993	0.145008	0.184752	0.084308	0.00737695	0.182669	0.0899782	0.0319249	0.0483183	0.0850586	0.107382	0.127774	0.216526	0.0973351	0.0130345	P23246	Splicing factor proline- and glutamine-rich OS=Homo sapiens OX=9606 GN=SFPQ PE=1 SV=2	unknown	NUCLEUS	0.924846	NUCLEUS
P08237	0.0283776	0.0676022	0.0393657	0.0755862	0.0784391	0.070072	0.0699308	0.268997	0.262777	0.0388516	0.0330302	0.0441038	0.0502493	0.0554561	0.0703212	0.075022	0.127471	0.289418	0.214256	0.0406718	0.0433581	0.0488774	0.0445404	0.0527983	0.0738198	0.102122	0.0831212	0.192367	0.188579	0.170417	P08237	ATP-dependent 6-phosphofructokinase muscle type OS=Homo sapiens OX=9606 GN=PFKM PE=1 SV=2	unknown	NUCLEUS	0.924636	NUCLEUS
H0Y6E7	0.226786	0.152574	0.0281417	0.0635433	0.0772694	0.071857	0.0982293	0.161721	0.108299	0.0115793	0.28115	0.0668155	0.0225864	0.0425583	0.0727203	0.0653361	0.160834	0.188764	0.0939038	0.00533095	0.250692	0.106117	0.0312007	0.0336631	0.06511	0.0694555	0.097006	0.235048	0.0948332	0.016875	H0Y6E7	RNA-binding motif protein X chromosome (Fragment) OS=Homo sapiens OX=9606 GN=RBMX PE=1 SV=2	unknown	NUCLEUS	0.873717	NUCLEUS
O95104	0.0888163	0.111411	0.0400739	0.0781583	0.0761688	0.0771636	0.075032	0.21117	0.21657	0.025437	0.155959	0.0716001	0.0510357	0.0624437	0.0709997	0.0529871	0.0930651	0.267637	0.158511	0.015761	0.101523	0.0582421	0.0393401	0.0432808	0.0924392	0.107801	0.111742	0.241317	0.179001	0.0253139	O95104	Splicing factor arginine/serine-rich 15 OS=Homo sapiens OX=9606 GN=SCAF4 PE=1 SV=3	NUCLEUS	NUCLEUS	1	NUCLEUS
A0A1W2PP04	0.0348108	0.0682626	0.0426511	0.0889609	0.0866611	0.0759983	0.0860339	0.255384	0.244512	0.0167259	0.0453657	0.0460173	0.0604333	0.0670305	0.0781072	0.0754194	0.15035	0.229679	0.21624	0.0313569	0.0362972	0.0362972	0.039641	0.0551278	0.100752	0.118175	0.133574	0.260196	0.18901	0.0309296	A0A1W2PP04	RNA-binding motif protein X-linked 2 OS=Homo sapiens OX=9606 GN=RBMX2 PE=1 SV=1	unknown	NUCLEUS	0.88024	NUCLEUS
P08729	0.199269	0.236513	0.0790467	0.0844368	0.0761983	0.0517553	0.0554078	0.0910653	0.10525	0.0210573	0.207714	0.115925	0.0735875	0.0678217	0.0925454	0.0812643	0.0964389	0.146916	0.0826163	0.0351706	0.21018	0.160581	0.080569	0.0499807	0.0590819	0.067626	0.0488665	0.116301	0.138	0.0688141	P08729	Keratin type II cytoskeletal 7 OS=Homo sapiens OX=9606 GN=KRT7 PE=1 SV=5	unknown	NUCLEUS-CHROMATIN	0.784666	NUCLEUS-CHROMATIN
P08727	0.212398	0.182823	0.0771302	0.0722126	0.0670677	0.0557873	0.0612451	0.109372	0.13359	0.0283749	0.228633	0.113114	0.0633793	0.0666217	0.0894119	0.0796916	0.10272	0.136429	0.0836131	0.0363866	0.223214	0.171152	0.0761134	0.0432702	0.0518561	0.0586309	0.045975	0.118203	0.143236	0.0683506	P08727	Keratin type I cytoskeletal 19 OS=Homo sapiens OX=9606 GN=KRT19 PE=1 SV=4	unknown	NUCLEUS-CHROMATIN	0.794588	NUCLEUS-CHROMATIN
P05783	0.226504	0.194287	0.0847735	0.0823497	0.0710733	0.0558498	0.060514	0.0950007	0.109236	0.0204115	0.213386	0.121742	0.074544	0.0733883	0.0900641	0.0754334	0.10065	0.142508	0.0803941	0.02789	0.202376	0.173135	0.0749077	0.046521	0.059308	0.0689878	0.0475991	0.11624	0.130876	0.0800495	P05783	Keratin type I cytoskeletal 18 OS=Homo sapiens OX=9606 GN=KRT18 PE=1 SV=2	unknown	NUCLEUS-CHROMATIN	0.787769	NUCLEUS-CHROMATIN
Q13813	0.262627	0.264861	0.0680674	0.0782581	0.0617357	0.0474256	0.0360369	0.065045	0.0661198	0.0498237	0.25745	0.200974	0.0938021	0.0665685	0.0673476	0.0572708	0.0627511	0.0787894	0.0571217	0.0579245	0.264378	0.212051	0.0957142	0.0555544	0.0532932	0.0543263	0.0380364	0.0744105	0.0681772	0.0840588	Q13813	Spectrin alpha chain non-erythrocytic 1 OS=Homo sapiens OX=9606 GN=SPTAN1 PE=1 SV=3	unknown	NUCLEUS-CHROMATIN	0.722321	NUCLEUS-CHROMATIN
Q04695	0.247799	0.202911	0.0812656	0.0646708	0.0630651	0.0416452	0.047981	0.097805	0.12594	0.0269171	0.2351	0.135496	0.0648224	0.0727005	0.0798668	0.064183	0.0869607	0.143217	0.0789499	0.0387028	0.271769	0.195705	0.0805599	0.03975	0.0477902	0.0469496	0.0399328	0.0994542	0.116107	0.0619823	Q04695	Keratin type I cytoskeletal 17 OS=Homo sapiens OX=9606 GN=KRT17 PE=1 SV=2	unknown	NUCLEUS-CHROMATIN	0.818707	NUCLEUS-CHROMATIN
Q01082	0.2758	0.28766	0.0681482	0.0721796	0.0574751	0.0421326	0.0360486	0.060081	0.0657614	0.0347142	0.274016	0.213772	0.0980164	0.0684845	0.060825	0.0503112	0.0608138	0.0737146	0.0550518	0.044994	0.281239	0.230744	0.0966199	0.0521906	0.0500112	0.0502194	0.0362783	0.0660467	0.0651603	0.0714902	Q01082	Spectrin beta chain non-erythrocytic 1 OS=Homo sapiens OX=9606 GN=SPTBN1 PE=1 SV=2	unknown	NUCLEUS-CHROMATIN	0.650632	NUCLEUS-CHROMATIN
O15020	0.276135	0.275804	0.0610608	0.0741558	0.0562422	0.0389171	0.0389907	0.0690429	0.0779445	0.0317075	0.268646	0.220482	0.0910919	0.06231	0.0574702	0.0486322	0.0577975	0.0794014	0.064274	0.0498948	0.267455	0.21522	0.0892723	0.0463874	0.0464308	0.0478637	0.0394402	0.0946709	0.0986221	0.0546373	O15020	Spectrin beta chain non-erythrocytic 2 OS=Homo sapiens OX=9606 GN=SPTBN2 PE=1 SV=3	unknown	NUCLEUS-CHROMATIN	0.705282	NUCLEUS-CHROMATIN
P05787	0.198799	0.259482	0.0717271	0.0864339	0.0696643	0.0466152	0.046406	0.0856164	0.109764	0.0254914	0.191002	0.113709	0.0684653	0.0658827	0.0790351	0.0658296	0.0899359	0.187169	0.0930618	0.0459103	0.202431	0.152274	0.0791183	0.0402749	0.0504581	0.0533623	0.0509126	0.112619	0.151173	0.107377	P05787	Keratin type II cytoskeletal 8 OS=Homo sapiens OX=9606 GN=KRT8 PE=1 SV=7	unknown	NUCLEUS-CHROMATIN	0.791663	NUCLEUS-CHROMATIN
Q9NSB4	0.229841	0.253886	0.0857561	0.0753337	0.0543061	0.0503748	0.0618943	0.0845676	0.0906016	0.0134394	0.254456	0.122087	0.0665274	0.058595	0.089639	0.0716198	0.120552	0.127407	0.0725991	0.0165176	0.214869	0.191164	0.0671753	0.0396026	0.0525905	0.0812988	0.0477644	0.107913	0.12846	0.0691625	Q9NSB4	Keratin type II cuticular Hb2 OS=Homo sapiens OX=9606 GN=KRT82 PE=1 SV=3	unknown	NUCLEUS-CHROMATIN	0.763085	NUCLEUS-CHROMATIN
P13647	0.185926	0.270593	0.0876501	0.0929965	0.0696312	0.0536459	0.0409128	0.08563	0.0852462	0.027769	0.179185	0.146132	0.0812818	0.0716214	0.0802968	0.0700819	0.094087	0.153173	0.0813183	0.0428225	0.208598	0.174719	0.0710311	0.0614621	0.0599673	0.0623131	0.0631206	0.104135	0.128107	0.0665466	P13647	Keratin type II cytoskeletal 5 OS=Homo sapiens OX=9606 GN=KRT5 PE=1 SV=3	unknown	NUCLEUS-CHROMATIN	0.767674	NUCLEUS-CHROMATIN
O00116	0.0403371	0.255326	0.160559	0.295137	0.152733	0.0542213	0.0175745	0.00915494	0.00791359	0.0070433	0.0564769	0.162975	0.222823	0.258416	0.175814	0.0752113	0.0357796	0.00482714	0.00273071	0.00494732	0.0592637	0.13494	0.197007	0.229511	0.194807	0.114419	0.0405404	0.00934157	0.0061574	0.0140124	O00116	Alkyldihydroxyacetonephosphate synthase peroxisomal OS=Homo sapiens OX=9606 GN=AGPS PE=1 SV=1	PEROXISOME	PEROXISOME	1	PEROXISOME
Q9NUI1	0.0394098	0.237449	0.157887	0.283741	0.154322	0.0614912	0.0216358	0.0174275	0.0207941	0.00584216	0.055506	0.159145	0.20695	0.248086	0.176426	0.0769664	0.0430618	0.0139469	0.0116929	0.00821789	0.0716454	0.147524	0.194409	0.211422	0.18107	0.0980831	0.0374601	0.0206869	0.0174121	0.0202875	Q9NUI1	Peroxisomal 24-dienoyl-CoA reductase OS=Homo sapiens OX=9606 GN=DECR2 PE=1 SV=1	PEROXISOME	PEROXISOME	1	PEROXISOME
O60568	0.0505539	0.224784	0.174378	0.287009	0.153784	0.059941	0.0219211	0.0104855	0.00931966	0.00782366	0.0581201	0.161146	0.213115	0.232159	0.186498	0.0797264	0.0435334	0.0115202	0.00771317	0.00646774	0.0719134	0.164608	0.208851	0.207015	0.174929	0.0978235	0.0367548	0.0157971	0.0111728	0.0111349	O60568	Procollagen-lysine2-oxoglutarate 5-dioxygenase 3 OS=Homo sapiens OX=9606 GN=PLOD3 PE=1 SV=1	unknown	PEROXISOME	0.688862	PEROXISOME
P09110	0.0371561	0.259641	0.167238	0.293367	0.143352	0.0618907	0.0157796	0.00985773	0.00909944	0.0026179	0.0598283	0.155956	0.209194	0.250433	0.189865	0.0713252	0.0405618	0.0113082	0.00640118	0.00512724	0.0619051	0.137585	0.199264	0.222432	0.203245	0.109634	0.038901	0.0093046	0.00823727	0.00949296	P09110	3-ketoacyl-CoA thiolase peroxisomal OS=Homo sapiens OX=9606 GN=ACAA1 PE=1 SV=2	PEROXISOME	PEROXISOME	1	PEROXISOME
P16190	0.136966	0.204783	0.0943983	0.171414	0.155808	0.103343	0.0770158	0.0373025	0.0128783	0.00609021	0.112938	0.157823	0.127884	0.148389	0.156376	0.104157	0.115927	0.0478281	0.0135451	0.0151331	0.203528	0.192149	0.144944	0.127503	0.11518	0.0883478	0.0696646	0.0395528	0.00993789	0.00919255	P16190	HLA class I histocompatibility antigen A-33 alpha chain OS=Homo sapiens OX=9606 GN=HLA-A PE=1 SV=3	unknown	PM	0.880751	PM
Q31612	0.0967436	0.204206	0.132564	0.176934	0.164179	0.108548	0.0672999	0.0284939	0.0101764	0.0108548	0.102199	0.150619	0.138114	0.179388	0.173659	0.109284	0.116553	0.0233475	0.00585228	0.000985647	0.144167	0.152914	0.156868	0.135588	0.15527	0.106821	0.0745227	0.0378501	0.0164858	0.0195138	Q31612	HLA class I histocompatibility antigen B-73 alpha chain OS=Homo sapiens OX=9606 GN=HLA-B PE=1 SV=1	unknown	PM	0.672552	PM
P13746	0.11163	0.187264	0.120655	0.176291	0.153201	0.122275	0.0851795	0.0296916	0.0106902	0.00312231	0.11679	0.150565	0.145702	0.165371	0.162475	0.105972	0.115376	0.0288709	0.00494429	0.00393388	0.179611	0.192158	0.132713	0.13818	0.14283	0.106489	0.0600938	0.0364459	0.00777094	0.00370743	P13746	HLA class I histocompatibility antigen A-11 alpha chain OS=Homo sapiens OX=9606 GN=HLA-A PE=1 SV=1	unknown	PM	0.83305	PM
Q8N3E9	0.142388	0.201533	0.0952903	0.162103	0.14184	0.0810515	0.0646221	0.0476451	0.0284775	0.0350493	0.118456	0.16971	0.116265	0.135013	0.144266	0.100438	0.0975164	0.060263	0.0213051	0.0367665	0.217792	0.18682	0.131466	0.104778	0.102142	0.0813839	0.0642504	0.0583196	0.0191104	0.0339374	Q8N3E9	1-phosphatidylinositol 45-bisphosphate phosphodiesterase delta-3 OS=Homo sapiens OX=9606 GN=PLCD3 PE=1 SV=3	unknown	PM	0.778441	PM
P09543	0.138492	0.236335	0.0879947	0.145415	0.128521	0.0768898	0.0642603	0.0602633	0.0444609	0.0173682	0.128125	0.159992	0.111688	0.12257	0.123272	0.0909618	0.111825	0.0789506	0.0463051	0.0263118	0.219828	0.224184	0.146715	0.116692	0.0992964	0.0798134	0.0588357	0.031544	0.00834987	0.0147411	P09543	2'3'-cyclic-nucleotide 3'-phosphodiesterase OS=Homo sapiens OX=9606 GN=CNP PE=1 SV=2	unknown	PM	0.669276	PM
P05187	0.132261	0.193682	0.108329	0.172714	0.153476	0.104214	0.0860341	0.0319502	0.0104336	0.0069067	0.134706	0.16846	0.146062	0.166206	0.13567	0.0961687	0.106662	0.0295154	0.0076005	0.00894823	0.222991	0.222783	0.14049	0.123917	0.0961151	0.0724141	0.0614466	0.0324325	0.010359	0.0170523	P05187	Alkaline phosphatase placental type OS=Homo sapiens OX=9606 GN=ALPP PE=1 SV=2	unknown	PM	0.846057	PM
P10696	0.135162	0.191559	0.104903	0.181662	0.157485	0.0996708	0.0865689	0.0288854	0.0085239	0.00558087	0.123845	0.172375	0.152347	0.161353	0.137888	0.0992534	0.102216	0.030813	0.00871059	0.0111993	0.208791	0.219379	0.145745	0.12112	0.108366	0.0835004	0.0563087	0.0320045	0.00745969	0.0173257	P10696	Alkaline phosphatase placental-like OS=Homo sapiens OX=9606 GN=ALPPL2 PE=2 SV=4	unknown	PM	0.856811	PM
P30462	0.112651	0.182299	0.100042	0.201689	0.157616	0.102897	0.0787486	0.03759	0.0121929	0.0142747	0.110735	0.130698	0.136763	0.181543	0.186192	0.107096	0.114424	0.0178409	0.00636814	0.00833923	0.170659	0.193649	0.140104	0.133501	0.136143	0.10799	0.0656702	0.0332553	0.00492226	0.0141065	P30462	HLA class I histocompatibility antigen B-14 alpha chain OS=Homo sapiens OX=9606 GN=HLA-B PE=1 SV=1	unknown	PM	0.798467	PM
P11166	0.1113	0.166247	0.101303	0.164162	0.163368	0.128845	0.104477	0.0422305	0.0132381	0.00482829	0.127186	0.14338	0.125761	0.142167	0.15619	0.119143	0.147295	0.0315785	0.00461761	0.00268119	0.160938	0.166499	0.12189	0.122502	0.141839	0.126074	0.0878246	0.0486743	0.0104424	0.0133166	P11166	Solute carrier family 2 facilitated glucose transporter member 1 OS=Homo sapiens OX=9606 GN=SLC2A1 PE=1 SV=2	PM	PM	1	PM
F5H2F4	0.0284507	0.106769	0.0641674	0.127656	0.120276	0.10362	0.0941591	0.194838	0.148958	0.0111066	0.0344615	0.0536402	0.071892	0.0863357	0.11529	0.0929037	0.161352	0.232794	0.136789	0.014542	0.0250983	0.0386677	0.0494805	0.0664165	0.0999537	0.115498	0.137397	0.259945	0.179669	0.0278744	F5H2F4	C-1-tetrahydrofolate synthase cytoplasmic OS=Homo sapiens OX=9606 GN=MTHFD1 PE=1 SV=1	unknown	RIBOSOME	0.869545	RIBOSOME
I3L3Z2	0.0282985	0.070967	0.0649059	0.103279	0.130976	0.0800385	0.142135	0.184121	0.160559	0.0347208	0.0415834	0.0500473	0.0719167	0.0880559	0.114236	0.0900536	0.153927	0.216907	0.117075	0.0561981	0.0331351	0.0363375	0.052807	0.0586236	0.132932	0.144108	0.177635	0.212666	0.0993399	0.0524149	I3L3Z2	N-alpha-acetyltransferase 38 NatC auxiliary subunit OS=Homo sapiens OX=9606 GN=NAA38 PE=1 SV=2	unknown	RIBOSOME	0.853178	RIBOSOME
P62701	0.0267921	0.104096	0.0618536	0.117482	0.116983	0.10321	0.102976	0.16243	0.189469	0.0147091	0.0358173	0.0581814	0.0723067	0.0905334	0.112149	0.0965483	0.151244	0.18495	0.170438	0.0278326	0.0301627	0.0426194	0.0528333	0.0778748	0.112126	0.133464	0.14845	0.212341	0.167498	0.0226314	P62701	40S ribosomal protein S4 X isoform OS=Homo sapiens OX=9606 GN=RPS4X PE=1 SV=2	RIBOSOME	RIBOSOME	1	RIBOSOME
Q5VZE5	0.0326327	0.115287	0.0631192	0.123813	0.13303	0.116537	0.105306	0.150345	0.125856	0.0340732	0.0386299	0.0674873	0.0754402	0.086722	0.117271	0.116693	0.153974	0.161306	0.114477	0.0680011	0.0336284	0.0465193	0.0546461	0.0769104	0.119893	0.151376	0.170191	0.174336	0.113245	0.0592555	Q5VZE5	N-alpha-acetyltransferase 35 NatC auxiliary subunit OS=Homo sapiens OX=9606 GN=NAA35 PE=1 SV=1	unknown	RIBOSOME	0.799421	RIBOSOME
P19525	0.0304892	0.10742	0.0637843	0.111783	0.114347	0.109385	0.101167	0.197864	0.154153	0.00960802	0.037879	0.0576158	0.0669799	0.0833023	0.102448	0.0981768	0.167303	0.200681	0.167979	0.0176352	0.0305832	0.0438278	0.0486165	0.0702674	0.110383	0.138381	0.15042	0.235009	0.157987	0.0145249	P19525	Interferon-induced double-stranded RNA-activated protein kinase OS=Homo sapiens OX=9606 GN=EIF2AK2 PE=1 SV=2	unknown	RIBOSOME	0.916668	RIBOSOME
H0YGR4	0.067459	0.167437	0.0709255	0.0915869	0.101216	0.0741169	0.0514471	0.0352702	0.0536756	0.286866	0.086324	0.144608	0.119169	0.0894101	0.126047	0.112865	0.109999	0.0585927	0.043162	0.109823	0.0927027	0.111029	0.0872544	0.0844477	0.0878323	0.129272	0.0641407	0.0860162	0.0485389	0.208767	H0YGR4	Oligoribonuclease mitochondrial (Fragment) OS=Homo sapiens OX=9606 GN=REXO2 PE=1 SV=1	unknown	CYTOSOL	0.811429	unknown
Q15434	0.0248993	0.12587	0.0612871	0.136168	0.140699	0.121796	0.135573	0.1461	0.0983156	0.00929147	0.0349576	0.0573211	0.0707392	0.0832156	0.121704	0.118291	0.19721	0.215513	0.0896893	0.0113583	0.0252545	0.0441713	0.0613597	0.0678894	0.128289	0.137603	0.187248	0.242942	0.0856539	0.019589	Q15434	RNA-binding motif single-stranded-interacting protein 2 OS=Homo sapiens OX=9606 GN=RBMS2 PE=1 SV=1	unknown	RIBOSOME	0.663939	unknown
Q9NR28	0.304507	0.455961	0.0862896	0.0153015	0.0211632	0.0167859	0.0200974	0.0237515	0.0251218	0.0310216	0.294491	0.475634	0.10638	0.0201384	0.0198821	0.01773	0.015629	0.014143	0.0115808	0.0243915	0.302206	0.377256	0.0843598	0.0189058	0.0273561	0.0388141	0.0214838	0.0366657	0.0306502	0.0623031	Q9NR28	Diablo homolog mitochondrial OS=Homo sapiens OX=9606 GN=DIABLO PE=1 SV=1	unknown	MITOCHONDRIA	0.922557	unknown
O15327	0.0642425	0.150093	0.0754037	0.0863031	0.0935853	0.0967385	0.0696327	0.102129	0.0987494	0.163123	0.0490713	0.0651512	0.0817156	0.0738274	0.104715	0.106291	0.102828	0.117816	0.0967327	0.201852	0.0439095	0.0594981	0.0667232	0.0711135	0.0902439	0.120926	0.0662213	0.11597	0.0999717	0.265422	O15327	Type II inositol 34-bisphosphate 4-phosphatase OS=Homo sapiens OX=9606 GN=INPP4B PE=2 SV=4	unknown	CYTOSOL	0.789249	unknown
A0A087X0W9	0.0213992	0.0823045	0.0374321	0.0695309	0.0760494	0.0616626	0.0549794	0.166551	0.354074	0.0760165	0.0275552	0.0506116	0.0718403	0.0522986	0.0919443	0.0757767	0.10277	0.155771	0.289611	0.081822	0.0240145	0.0225268	0.0337902	0.034109	0.0425035	0.0596111	0.0378281	0.194135	0.413452	0.13803	A0A087X0W9	OTU domain containing 6B isoform CRA_b OS=Homo sapiens OX=9606 GN=OTUD6B PE=1 SV=1	unknown	PROTEASOME	0.467091	unknown
Q9BXJ9	0.0288923	0.0983207	0.0601166	0.124171	0.136874	0.119913	0.118767	0.147955	0.102759	0.0622311	0.0361691	0.0569573	0.0722434	0.0842488	0.116209	0.118397	0.186227	0.163152	0.0926602	0.0737364	0.0313454	0.0432802	0.0486051	0.0713308	0.115388	0.143987	0.150157	0.164271	0.103232	0.128403	Q9BXJ9	N-alpha-acetyltransferase 15 NatA auxiliary subunit OS=Homo sapiens OX=9606 GN=NAA15 PE=1 SV=1	unknown	RIBOSOME	0.518101	unknown
Q96Q11	0.133928	0.315386	0.0637657	0.0617004	0.0668063	0.0489358	0.0379209	0.0206815	0.0322701	0.218605	0.12898	0.208853	0.100476	0.0599047	0.0767368	0.0730846	0.0674077	0.0544264	0.0377531	0.192378	0.131408	0.170668	0.0829299	0.0583261	0.0763976	0.101134	0.0467538	0.0641952	0.0427416	0.225446	Q96Q11	CCA tRNA nucleotidyltransferase 1 mitochondrial OS=Homo sapiens OX=9606 GN=TRNT1 PE=1 SV=2	unknown	NUCLEUS-CHROMATIN	0.417058	unknown
Q16775	0.089322	0.257207	0.0693509	0.0812369	0.092221	0.0688678	0.0578837	0.0770817	0.0718312	0.134998	0.105702	0.154567	0.0687065	0.0598053	0.080853	0.0798331	0.098841	0.125637	0.0982847	0.12777	0.124208	0.146599	0.069333	0.0496174	0.069286	0.084589	0.0597099	0.11097	0.0793315	0.206356	Q16775	Hydroxyacylglutathione hydrolase mitochondrial OS=Homo sapiens OX=9606 GN=HAGH PE=1 SV=2	unknown	NUCLEUS-CHROMATIN	0.560035	unknown
P35914	0.190517	0.477213	0.101929	0.0879266	0.0484775	0.0208459	0.00986227	0.0143477	0.0267403	0.0221398	0.17748	0.307507	0.109517	0.0683646	0.0558981	0.0450402	0.0297587	0.0497319	0.0788204	0.077882	0.121516	0.165831	0.0716276	0.0535117	0.0501672	0.0434783	0.0181159	0.0897436	0.241081	0.144928	P35914	Hydroxymethylglutaryl-CoA lyase mitochondrial OS=Homo sapiens OX=9606 GN=HMGCL PE=1 SV=2	unknown	NUCLEUS-CHROMATIN	0.296732	unknown
E9PC15	0.249426	0.5728	0.105786	0.0164628	0.0100576	0.00867452	0.00726457	0.0131326	0.0095742	0.00682145	0.28166	0.518962	0.136572	0.0285041	0.00845462	0.00742798	0.00507277	0.00446887	0.00259678	0.00628057	0.340481	0.441403	0.139481	0.0293688	0.0167781	0.00758811	0.00505874	0.0075319	0.0041313	0.00817829	E9PC15	Acylglycerol kinase mitochondrial OS=Homo sapiens OX=9606 GN=AGK PE=1 SV=1	unknown	MITOCHONDRIA	0.930748	unknown
P04183	0.0469793	0.138035	0.0722278	0.121039	0.116438	0.103261	0.0869123	0.144601	0.129671	0.0408375	0.0503057	0.0730019	0.0804277	0.0798275	0.100625	0.117808	0.144245	0.174102	0.134739	0.0449178	0.0552255	0.0670748	0.0607234	0.0832896	0.124861	0.145244	0.115473	0.16548	0.1191	0.0635298	P04183	Thymidine kinase cytosolic OS=Homo sapiens OX=9606 GN=TK1 PE=1 SV=2	unknown	RIBOSOME	0.432216	unknown
P82914	0.243945	0.561427	0.059225	0.0455746	0.0187142	0.00836636	0.00814619	0.0226772	0.0231176	0.00880669	0.322968	0.489761	0.11508	0.0446804	0.00958422	0.00393022	0.00379232	0.00262015	0.00558505	0.00199959	0.337413	0.433905	0.0964912	0.00917993	0.0175439	0.0224398	0.0126479	0.0130559	0.0291718	0.0281518	P82914	28S ribosomal protein S15 mitochondrial OS=Homo sapiens OX=9606 GN=MRPS15 PE=1 SV=1	unknown	MITOCHONDRIA	0.940067	unknown
Q96HY7	0.203204	0.620046	0.0677698	0.0286151	0.0176539	0.012226	0.0056914	0.0121206	0.0168107	0.0158621	0.259436	0.466333	0.127242	0.0425146	0.0256054	0.0139501	0.0105683	0.0207138	0.0192041	0.0144332	0.33028	0.374941	0.134492	0.0361281	0.0220761	0.0211367	0.0146783	0.020119	0.0214107	0.0247377	Q96HY7	Probable 2-oxoglutarate dehydrogenase E1 component DHKTD1 mitochondrial OS=Homo sapiens OX=9606 GN=DHTKD1 PE=1 SV=2	unknown	MITOCHONDRIA	0.943099	unknown
C9JG87	0.321674	0.509994	0.0705809	0.0091193	0.0123673	0.0091193	0.00780762	0.0178014	0.0292942	0.0122423	0.32028	0.506862	0.112151	0.0197476	0.0075823	0.00499088	0.00575871	0.00827815	0.00765429	0.0066945	0.353058	0.38606	0.122902	0.0108108	0.00853485	0.0221906	0.0176387	0.0261735	0.0324324	0.0201991	C9JG87	39S ribosomal protein L39 mitochondrial (Fragment) OS=Homo sapiens OX=9606 GN=MRPL39 PE=1 SV=1	unknown	MITOCHONDRIA	0.93742	unknown
P00390	0.0571956	0.204496	0.0689811	0.0943972	0.0880714	0.068341	0.0479328	0.03129	0.0459748	0.29332	0.0794519	0.133646	0.0953032	0.0588159	0.0799727	0.0861895	0.0647398	0.0608014	0.05325	0.28783	0.0861381	0.121259	0.0702662	0.0546777	0.0668651	0.094759	0.040719	0.0553863	0.0436005	0.366329	P00390	Glutathione reductase mitochondrial OS=Homo sapiens OX=9606 GN=GSR PE=1 SV=2	unknown	CYTOSOL	0.764008	unknown
Q9Y224	0.0394869	0.0590887	0.0551589	0.0672434	0.0894651	0.0889576	0.134156	0.283241	0.168368	0.0148341	0.0418891	0.0479582	0.054582	0.0652331	0.09	0.0886656	0.159212	0.280812	0.153055	0.0185932	0.0385456	0.0443701	0.0481484	0.0767773	0.108994	0.138738	0.149238	0.262033	0.108439	0.0247161	Q9Y224	RNA transcription translation and transport factor protein OS=Homo sapiens OX=9606 GN=RTRAF PE=1 SV=1	unknown	RIBOSOME	0.627341	unknown
Q5T440	0.198572	0.64276	0.0800168	0.0263572	0.00850572	0.0103959	0.00252021	0.00420036	0.0192166	0.00745563	0.302899	0.475448	0.104689	0.029156	0.0181586	0.0140665	0.0150895	0.0207161	0.0127877	0.00699062	0.384605	0.423418	0.127116	0.0115916	0.013415	0.0033863	0.00403751	0.0104194	0.0106799	0.0113311	Q5T440	Putative transferase CAF17 mitochondrial OS=Homo sapiens OX=9606 GN=IBA57 PE=1 SV=1	unknown	MITOCHONDRIA	0.936154	unknown
Q96EY1	0.165857	0.514823	0.0660703	0.0334303	0.0286714	0.0219113	0.0242487	0.0574773	0.0658516	0.0216591	0.26944	0.483687	0.101278	0.0231104	0.0250136	0.0227026	0.0180805	0.0206634	0.019168	0.016857	0.350787	0.42829	0.121249	0.0223559	0.0161913	0.0154486	0.0112894	0.0152258	0.010101	0.0090612	Q96EY1	DnaJ homolog subfamily A member 3 mitochondrial OS=Homo sapiens OX=9606 GN=DNAJA3 PE=1 SV=2	unknown	MITOCHONDRIA	0.903359	unknown
A0A0C4DGA2	0.112597	0.437072	0.126734	0.181379	0.0898847	0.0358836	0.00746356	0.00371715	0.00286835	0.00240005	0.145603	0.284065	0.181389	0.166427	0.128481	0.0493479	0.0278845	0.00718115	0.00606097	0.00356057	0.155631	0.222233	0.183084	0.149154	0.127695	0.0735621	0.041276	0.021363	0.00927985	0.0167231	A0A0C4DGA2	Enoyl-CoA delta isomerase 2 mitochondrial OS=Homo sapiens OX=9606 GN=ECI2 PE=1 SV=1	unknown	NUCLEUS	0.15927	unknown
P56192	0.0267037	0.103545	0.0702416	0.11984	0.107536	0.0668156	0.0382077	0.0817457	0.219359	0.166004	0.0294743	0.061289	0.0865287	0.0856624	0.106247	0.0843564	0.0750144	0.094164	0.158201	0.219063	0.028319	0.0408764	0.0572737	0.0645707	0.0724645	0.0789119	0.0385089	0.110973	0.273046	0.235056	P56192	Methionine--tRNA ligase cytoplasmic OS=Homo sapiens OX=9606 GN=MARS PE=1 SV=2	unknown	PROTEASOME	0.467456	unknown
A0A0U1RRK1	0.185587	0.498883	0.0646433	0.0374458	0.0400079	0.0276573	0.0255551	0.0486138	0.0456576	0.0259493	0.233684	0.449168	0.124211	0.0404754	0.0321222	0.02309	0.0255348	0.0309677	0.0235654	0.0171817	0.279679	0.33233	0.128745	0.0482638	0.0472609	0.0279554	0.0265764	0.0352263	0.0275793	0.0463834	A0A0U1RRK1	Calcium uptake protein 1 mitochondrial OS=Homo sapiens OX=9606 GN=MICU1 PE=1 SV=1	unknown	MITOCHONDRIA	0.871341	unknown
J3KQ48	0.0740676	0.230125	0.140529	0.24362	0.176704	0.0822701	0.0344574	0.00949944	0.00560852	0.00311974	0.0792614	0.17551	0.175132	0.178192	0.169011	0.117156	0.0808088	0.0172621	0.00508923	0.002579	0.0965284	0.140597	0.161227	0.155916	0.159726	0.127357	0.084674	0.040682	0.016319	0.0169733	J3KQ48	Peptidyl-tRNA hydrolase 2 mitochondrial OS=Homo sapiens OX=9606 GN=PTRH2 PE=1 SV=1	unknown	ER	0.808716	unknown
Q4G0N4	0.251891	0.535724	0.0818156	0.0376156	0.0237461	0.0130989	0.00931634	0.0105772	0.0177221	0.0184926	0.259857	0.45283	0.112297	0.0420299	0.0247235	0.0195185	0.0187378	0.0286272	0.0152245	0.0261548	0.231317	0.289442	0.102017	0.0419929	0.0462633	0.0505338	0.0344009	0.0422301	0.0282325	0.133571	Q4G0N4	NAD kinase 2 mitochondrial OS=Homo sapiens OX=9606 GN=NADK2 PE=1 SV=2	unknown	MITOCHONDRIA	0.83954	unknown
P21281	0.0396042	0.169929	0.130587	0.174079	0.117917	0.0812181	0.0751234	0.0641793	0.0631089	0.0842544	0.0492756	0.130623	0.152115	0.137094	0.128746	0.0835554	0.0902794	0.0792926	0.0510264	0.0979929	0.05086	0.106845	0.12067	0.107379	0.102052	0.0959131	0.0629528	0.094678	0.0823456	0.176305	P21281	V-type proton ATPase subunit B brain isoform OS=Homo sapiens OX=9606 GN=ATP6V1B2 PE=1 SV=3	unknown	GOLGI	0.198032	unknown
J3KS15	0.175509	0.660928	0.0700984	0.0126493	0.00685172	0.0138791	0.0110682	0.00913563	0.0114195	0.028461	0.321569	0.516982	0.108674	0.0170156	0.00352277	0.00591559	0.00398804	0.01223	0.0079096	0.00219342	0.338652	0.4695	0.0920659	0.0177345	0.0150683	0.0125232	0.00521128	0.0164418	0.0241981	0.00860467	J3KS15	Peptidyl-tRNA hydrolase ICT1 mitochondrial (Fragment) OS=Homo sapiens OX=9606 GN=MRPL58 PE=1 SV=1	unknown	MITOCHONDRIA	0.918628	unknown
P35908	0.0981282	0.133996	0.108555	0.11983	0.0592532	0.182137	0.0586726	0.0813845	0.078145	0.0798983	0.238034	0.131224	0.142	0.0588905	0.111445	0.0978518	0.0461487	0.0468617	0.0806481	0.0468962	0.144436	0.0709506	0.0887453	0.0797205	0.0779639	0.167339	0.0768375	0.111448	0.102343	0.0802167	P35908	Keratin type II cytoskeletal 2 epidermal OS=Homo sapiens OX=9606 GN=KRT2 PE=1 SV=2	unknown	NUCLEUS	0.255932	unknown
Q96PE3	0.0391817	0.108014	0.0589651	0.098917	0.101468	0.0851023	0.0761974	0.217858	0.169916	0.0443803	0.0514844	0.0727529	0.0753931	0.0737503	0.0945494	0.101971	0.133302	0.185549	0.166774	0.0444731	0.0586159	0.0696929	0.0590503	0.0745799	0.111802	0.136345	0.114463	0.187359	0.12649	0.0616024	Q96PE3	Type I inositol 34-bisphosphate 4-phosphatase OS=Homo sapiens OX=9606 GN=INPP4A PE=1 SV=1	unknown	NUCLEUS	0.816506	unknown
P02533	0.133669	0.166995	0.118063	0.124407	0.0373368	0.0663604	0.0566616	0.116823	0.0759863	0.103697	0.121922	0.328905	0.123045	0.0278048	0.0714018	0.0644039	0.0481251	0.0380211	0.0391438	0.137228	0.160998	0.0975378	0.0781191	0.0496256	0.0962686	0.104455	0.0736134	0.110737	0.109278	0.119368	P02533	Keratin type I cytoskeletal 14 OS=Homo sapiens OX=9606 GN=KRT14 PE=1 SV=4	unknown	NUCLEUS-CHROMATIN	0.463061	unknown
Q15746	0.0778368	0.170719	0.0718278	0.107462	0.10299	0.0826812	0.0646544	0.115474	0.105273	0.101081	0.100411	0.107721	0.0983799	0.101719	0.10357	0.0916106	0.0964845	0.126044	0.0899409	0.0841193	0.104156	0.0953887	0.0704178	0.0760224	0.0915044	0.104767	0.0769658	0.126519	0.0931136	0.161145	Q15746	Myosin light chain kinase smooth muscle OS=Homo sapiens OX=9606 GN=MYLK PE=1 SV=4	unknown	NUCLEUS	0.438871	unknown
P49903	0.134686	0.0936201	0.0595209	0.0888536	0.0985089	0.0794427	0.0944757	0.131508	0.0960645	0.123319	0.159279	0.0839584	0.0633595	0.0676497	0.0940448	0.0958348	0.0969428	0.132089	0.0867144	0.120127	0.186424	0.105117	0.0508975	0.0556043	0.0819528	0.0967191	0.0713857	0.10664	0.0782613	0.166997	P49903	Selenide water dikinase 1 OS=Homo sapiens OX=9606 GN=SEPHS1 PE=1 SV=2	unknown	NUCLEUS	0.422589	unknown
Q12872	0.0716846	0.139785	0.102151	0.102151	0.137993	0.0376344	0.0734767	0.116487	0.175627	0.0430108	0.0462681	0.0491803	0.0554628	0.0611237	0.0877589	0.0801675	0.138739	0.241124	0.186741	0.0534341	0.0504202	0.0418013	0.0394671	0.0509229	0.079006	0.100589	0.0922933	0.246894	0.225921	0.0726855	Q12872	Splicing factor suppressor of white-apricot homolog OS=Homo sapiens OX=9606 GN=SFSWAP PE=1 SV=3	unknown	NUCLEUS	0.856939	unknown
D6RJ90	0.0387965	0.112927	0.125754	0.203898	0.185956	0.1198	0.0778291	0.0552175	0.0469545	0.0328682	0.0450528	0.0961351	0.136095	0.161037	0.155569	0.139615	0.113325	0.0605198	0.0543779	0.0382743	0.0430119	0.0827294	0.111852	0.165011	0.22041	0.178557	0.0736631	0.0413779	0.0340511	0.0493372	D6RJ90	COMM domain containing 10 isoform CRA_b OS=Homo sapiens OX=9606 GN=COMMD10 PE=1 SV=1	unknown	ER	0.531104	unknown
Q86WA8	0.039551	0.254884	0.143485	0.297453	0.160798	0.0485519	0.0210197	0.0165722	0.0105893	0.00709483	0.0588993	0.152501	0.198997	0.223939	0.190796	0.0771994	0.0453436	0.0234513	0.0133523	0.0155212	0.0497827	0.121987	0.158534	0.205354	0.223429	0.116752	0.0407942	0.0326946	0.0246938	0.0259779	Q86WA8	Lon protease homolog 2 peroxisomal OS=Homo sapiens OX=9606 GN=LONP2 PE=1 SV=1	unknown	PEROXISOME	0.501155	unknown
G3V1L9	0.125772	0.159888	0.0511736	0.072981	0.0705971	0.058175	0.0602472	0.181097	0.18676	0.0333089	0.126397	0.0994572	0.0712895	0.0662119	0.0800585	0.0681781	0.0930236	0.197585	0.156011	0.0417883	0.172822	0.141401	0.0717504	0.0506387	0.0656449	0.074005	0.0553612	0.141268	0.149216	0.0778927	G3V1L9	Tight junction protein 1 (Zona occludens 1) isoform CRA_a OS=Homo sapiens OX=9606 GN=TJP1 PE=1 SV=1	unknown	NUCLEUS	0.707833	unknown
P13645	0.0839845	0.107595	0.150308	0.114575	0.0590159	0.164296	0.0726198	0.106601	0.0630727	0.0779321	0.145215	0.163922	0.153928	0.0610867	0.115092	0.111051	0.0366839	0.0368249	0.120236	0.0559609	0.138295	0.0585517	0.077397	0.0935029	0.0874244	0.185652	0.0679485	0.104802	0.0878276	0.0985993	P13645	Keratin type I cytoskeletal 10 OS=Homo sapiens OX=9606 GN=KRT10 PE=1 SV=6	unknown	NUCLEUS	0.25457	unknown
P04264	0.118672	0.125878	0.130699	0.104339	0.0546348	0.104311	0.0527315	0.111402	0.0733012	0.124032	0.207032	0.149259	0.135058	0.0570291	0.104619	0.0975791	0.044098	0.0406472	0.0724103	0.092268	0.145498	0.0705294	0.0660246	0.0891531	0.0993556	0.15788	0.0836189	0.0974437	0.0834445	0.107052	P04264	Keratin type II cytoskeletal 1 OS=Homo sapiens OX=9606 GN=KRT1 PE=1 SV=6	unknown	NUCLEUS-CHROMATIN	0.313629	unknown
Q9BYT8	0.137747	0.346903	0.0674627	0.063648	0.062211	0.0492253	0.0302041	0.0215818	0.029577	0.19144	0.137932	0.231555	0.0994815	0.0542524	0.069022	0.062984	0.0610985	0.0359363	0.0318062	0.215932	0.132108	0.169586	0.0805976	0.0568357	0.0696018	0.0846706	0.0442999	0.0545185	0.040601	0.267181	Q9BYT8	Neurolysin mitochondrial OS=Homo sapiens OX=9606 GN=NLN PE=1 SV=1	unknown	NUCLEUS-CHROMATIN	0.405989	unknown
P02538	0.401968	0.11361	0.100258	0.0695713	0.0334973	0.019911	0.0285781	0.0517686	0.102834	0.0780042	0.0596573	0.454837	0.0995356	0.0233024	0.05213	0.032271	0.0425208	0.0164958	0.0423607	0.17689	0.218709	0.191764	0.0702593	0.0565328	0.0724962	0.0782918	0.0404677	0.128927	0.111235	0.0313167	P02538	Keratin type II cytoskeletal 6A OS=Homo sapiens OX=9606 GN=KRT6A PE=1 SV=3	unknown	NUCLEUS-CHROMATIN	0.285286	unknown
E9PJX4	0.0558856	0.119985	0.0685735	0.113898	0.10385	0.0888889	0.0724606	0.142501	0.145508	0.0884488	0.0452362	0.0780153	0.0839799	0.087886	0.113434	0.10066	0.0941145	0.159303	0.118448	0.118923	0.0670679	0.0768128	0.0730868	0.0736601	0.100029	0.106048	0.0776727	0.124391	0.104901	0.196331	E9PJX4	FYVE RhoGEF and PH domain-containing protein 4 OS=Homo sapiens OX=9606 GN=FGD4 PE=1 SV=1	unknown	NUCLEUS	0.620396	unknown
O94925-3	0.310001	0.525452	0.0962327	0.0186123	0.0121732	0.00792863	0.00531779	0.00637494	0.007352	0.0105555	0.311643	0.499389	0.120857	0.0194212	0.0102339	0.00794254	0.00819591	0.00846029	0.00533175	0.00852639	0.33893	0.447417	0.124773	0.0231952	0.0153418	0.0123213	0.00704793	0.00926299	0.00761428	0.0140959	O94925-3	Isoform 3 of Glutaminase kidney isoform mitochondrial OS=Homo sapiens OX=9606 GN=GLS	unknown	MITOCHONDRIA	0.941009	unknown
Q96DV4	0.182187	0.576746	0.0656132	0.0227396	0.023281	0.0242623	0.0207093	0.0403018	0.0309624	0.0131971	0.28907	0.512566	0.110532	0.0217034	0.00951984	0.0109559	0.0111644	0.0143377	0.0122762	0.00787529	0.334076	0.432392	0.0995595	0.0193314	0.0165328	0.0194869	0.00953615	0.0183467	0.0285566	0.0221819	Q96DV4	39S ribosomal protein L38 mitochondrial OS=Homo sapiens OX=9606 GN=MRPL38 PE=1 SV=2	unknown	MITOCHONDRIA	0.934762	unknown
Q9NP58	0.0377049	0.245287	0.172746	0.212295	0.104303	0.0668033	0.044877	0.0588115	0.0389344	0.0182377	0.0507819	0.226749	0.244362	0.190864	0.120988	0.0674074	0.0540741	0.01893	0.00888889	0.0169547	0.0783497	0.224199	0.246909	0.18698	0.116831	0.0623265	0.0439061	0.0251072	0.00832702	0.00706535	Q9NP58	ATP-binding cassette sub-family B member 6 mitochondrial OS=Homo sapiens OX=9606 GN=ABCB6 PE=1 SV=1	unknown	LYSOSOME	0.341108	unknown
E7EPT4	0.29649	0.556878	0.100123	0.0126809	0.00777637	0.00484858	0.00464344	0.00432642	0.00374832	0.00848501	0.318494	0.5011	0.115916	0.0134172	0.0135492	0.0121855	0.00827028	0.00585078	0.00461904	0.00659863	0.354495	0.448811	0.10767	0.0217323	0.0179038	0.0118007	0.00727412	0.00966129	0.00646338	0.0141879	E7EPT4	NADH dehydrogenase [ubiquinone] flavoprotein 2 mitochondrial OS=Homo sapiens OX=9606 GN=NDUFV2 PE=1 SV=1	unknown	MITOCHONDRIA	0.94274	unknown
G5EA09	0.07866	0.225306	0.115198	0.18729	0.12735	0.0649479	0.0658511	0.0532063	0.0450776	0.0371131	0.0626155	0.144482	0.149988	0.113616	0.133791	0.114862	0.0874528	0.0752753	0.0530504	0.0648662	0.0836281	0.116258	0.151169	0.0962921	0.0984598	0.0917285	0.0693668	0.0902453	0.0627496	0.140103	G5EA09	Syndecan binding protein (Syntenin) isoform CRA_a OS=Homo sapiens OX=9606 GN=SDCBP PE=1 SV=1	unknown	GOLGI	0.327011	unknown
Q96P48-1	0.0545359	0.148663	0.0860645	0.108285	0.106384	0.0971421	0.0845569	0.128015	0.117659	0.0686943	0.0728617	0.0966209	0.0786695	0.092397	0.117212	0.0876452	0.102957	0.157339	0.104013	0.0902851	0.0610734	0.0598396	0.0838988	0.0259099	0.100555	0.120296	0.135719	0.151758	0.122147	0.138803	Q96P48-1	Isoform 1 of Arf-GAP with Rho-GAP domain ANK repeat and PH domain-containing protein 1 OS=Homo sapiens OX=9606 GN=ARAP1	unknown	NUCLEUS	0.69749	unknown
Q9P2J5	0.030495	0.135954	0.075919	0.125643	0.119965	0.0837228	0.0496202	0.0492324	0.0849554	0.244493	0.0343343	0.060813	0.0803896	0.0663948	0.0982279	0.0891694	0.0704436	0.0622433	0.0692114	0.368773	0.0298771	0.0489652	0.0600297	0.0684122	0.0778018	0.0928892	0.0426665	0.0906218	0.183007	0.305729	Q9P2J5	Leucine--tRNA ligase cytoplasmic OS=Homo sapiens OX=9606 GN=LARS PE=1 SV=2	unknown	CYTOSOL	0.748971	unknown
G5E9E7	0.133786	0.171817	0.0665535	0.0614601	0.0672326	0.0329372	0.0604414	0.177929	0.188115	0.0397284	0.134529	0.0928892	0.0736707	0.0442024	0.0807175	0.0538117	0.103139	0.202434	0.170404	0.0442024	0.188052	0.136117	0.075017	0.0587237	0.0675492	0.0699253	0.0553293	0.159199	0.119484	0.0706042	G5E9E7	Tight junction protein 1 (Zona occludens 1) isoform CRA_e OS=Homo sapiens OX=9606 GN=TJP1 PE=1 SV=1	unknown	NUCLEUS	0.593833	unknown
Q14533	0.0384482	0.0994455	0.101698	0.0840012	0.111142	0.0816402	0.11398	0.0586579	0.0779145	0.233072	0.0401971	0.0692895	0.178002	0.0870598	0.140276	0.134914	0.108007	0.0517227	0.04746	0.143072	0.0416625	0.0572537	0.0886488	0.0850138	0.104005	0.134382	0.0628572	0.0774531	0.0666152	0.282108	Q14533	Keratin type II cuticular Hb1 OS=Homo sapiens OX=9606 GN=KRT81 PE=1 SV=3	unknown	CYTOSOL	0.744259	unknown
O43572	0.0412126	0.106867	0.0567665	0.112581	0.1184	0.101947	0.0966035	0.183367	0.136335	0.0459211	0.0586844	0.0722398	0.0670441	0.0739717	0.0977519	0.10378	0.140583	0.186145	0.140383	0.0594172	0.0439427	0.0474164	0.0520191	0.0711246	0.0972644	0.135432	0.117455	0.194963	0.150977	0.0894051	O43572	A-kinase anchor protein 10 mitochondrial OS=Homo sapiens OX=9606 GN=AKAP10 PE=1 SV=2	unknown	NUCLEUS	0.570799	unknown
P30044	0.0930048	0.268373	0.0916809	0.0972413	0.0904066	0.0621411	0.0429444	0.0197097	0.0249888	0.209509	0.117426	0.178759	0.115946	0.088867	0.116601	0.084775	0.0723759	0.0317954	0.0276264	0.165828	0.113452	0.138772	0.0916123	0.0793496	0.0840699	0.105916	0.0492228	0.064057	0.0417019	0.231846	P30044	Peroxiredoxin-5 mitochondrial OS=Homo sapiens OX=9606 GN=PRDX5 PE=1 SV=4	unknown	CYTOSOL	0.400422	unknown
A2A274	0.174517	0.682882	0.0770178	0.0138906	0.00878255	0.00916531	0.00501065	0.00872688	0.00772475	0.012283	0.299041	0.482407	0.114903	0.027135	0.0140955	0.0112194	0.011275	0.0122892	0.009045	0.0185902	0.349875	0.427932	0.110741	0.0259571	0.0155578	0.0129992	0.00800586	0.0143817	0.00953275	0.0250183	A2A274	Aconitate hydratase mitochondrial OS=Homo sapiens OX=9606 GN=ACO2 PE=1 SV=1	unknown	MITOCHONDRIA	0.934855	unknown
P29558	0.0295652	0.125072	0.0648551	0.141304	0.131014	0.113551	0.13587	0.148623	0.09	0.0201449	0.0373499	0.0582589	0.0636694	0.078365	0.126431	0.114074	0.189891	0.198722	0.0927813	0.0404566	0.0332684	0.0490019	0.0627872	0.0704334	0.107856	0.127927	0.174429	0.24637	0.0889975	0.0389295	P29558	RNA-binding motif single-stranded-interacting protein 1 OS=Homo sapiens OX=9606 GN=RBMS1 PE=1 SV=3	unknown	RIBOSOME	0.733463	unknown
O94887	0.11607	0.159268	0.0758645	0.0981213	0.0800527	0.0622233	0.0610267	0.160345	0.141917	0.0451119	0.0992266	0.126033	0.090174	0.0899982	0.083846	0.0722447	0.0959747	0.164089	0.127703	0.0507119	0.139087	0.149073	0.116976	0.0506419	0.0592011	0.0527817	0.0313837	0.0891583	0.0955777	0.21612	O94887	FERM ARHGEF and pleckstrin domain-containing protein 2 OS=Homo sapiens OX=9606 GN=FARP2 PE=1 SV=3	unknown	NUCLEUS-CHROMATIN	0.482951	unknown
Q01813	0.0337991	0.08137	0.04679	0.086594	0.0887946	0.0730476	0.0695065	0.189971	0.220834	0.109294	0.0406165	0.0475455	0.0595924	0.0578481	0.0823205	0.0763564	0.120996	0.213823	0.186081	0.11482	0.0350568	0.0429152	0.0501518	0.0585748	0.0764629	0.0983204	0.0686919	0.153366	0.17563	0.24083	Q01813	ATP-dependent 6-phosphofructokinase platelet type OS=Homo sapiens OX=9606 GN=PFKP PE=1 SV=2	unknown	NUCLEUS	0.813412	unknown
O60825	0.0300329	0.0965042	0.0526634	0.0922742	0.0938756	0.0782246	0.0631779	0.117261	0.151796	0.22419	0.0359026	0.0541411	0.0724143	0.0664625	0.0866153	0.0858495	0.103461	0.149945	0.132942	0.212266	0.0309964	0.0463375	0.0581706	0.0663909	0.0822556	0.110582	0.0559715	0.0887481	0.0856589	0.374889	O60825	6-phosphofructo-2-kinase/fructose-26-bisphosphatase 2 OS=Homo sapiens OX=9606 GN=PFKFB2 PE=1 SV=2	unknown	CYTOSOL	0.701407	unknown
Q9H2U2	0.23375	0.475639	0.079101	0.0307232	0.0315933	0.0235454	0.0201015	0.0205546	0.0193402	0.0656516	0.238331	0.391091	0.111634	0.0391282	0.0364544	0.0348199	0.030562	0.0278579	0.0205529	0.0695692	0.253097	0.324797	0.0952308	0.0394897	0.0454916	0.0501085	0.0253928	0.0389203	0.0303021	0.0971699	Q9H2U2	Inorganic pyrophosphatase 2 mitochondrial OS=Homo sapiens OX=9606 GN=PPA2 PE=1 SV=2	unknown	MITOCHONDRIA	0.807086	unknown
P47813	0.0187363	0.0792248	0.0399783	0.0748678	0.0776173	0.0704221	0.0729166	0.186565	0.332853	0.0468187	0.0315914	0.04037	0.056648	0.0575928	0.0816849	0.0700915	0.109773	0.184214	0.282649	0.0853853	0.0253196	0.0352017	0.0380328	0.045529	0.0675902	0.0774545	0.0646345	0.223122	0.341494	0.081621	P47813	Eukaryotic translation initiation factor 1A X-chromosomal OS=Homo sapiens OX=9606 GN=EIF1AX PE=1 SV=2	unknown	NUCLEUS	0.57338	unknown
O94760	0.0462896	0.0995314	0.085213	0.0982456	0.120649	0.10219	0.0867168	0.0428898	0.0400349	0.278239	0.0757193	0.103026	0.127025	0.117113	0.153697	0.132042	0.122008	0.0420405	0.0347286	0.0926014	0.0794694	0.101125	0.0902764	0.0974441	0.119169	0.148368	0.0649257	0.0765106	0.0422975	0.180414	O94760	N(G)N(G)-dimethylarginine dimethylaminohydrolase 1 OS=Homo sapiens OX=9606 GN=DDAH1 PE=1 SV=3	unknown	CYTOSOL	0.839062	unknown
Q96BJ3	0.0684757	0.189053	0.0903396	0.168336	0.136703	0.105691	0.0677314	0.039386	0.0336486	0.100636	0.0932166	0.119543	0.123623	0.132574	0.14497	0.112413	0.1057	0.0400816	0.0327322	0.0951472	0.132562	0.147773	0.105595	0.102077	0.11068	0.110401	0.0548571	0.0502231	0.0299923	0.15584	Q96BJ3	Axin interactor dorsalization-associated protein OS=Homo sapiens OX=9606 GN=AIDA PE=1 SV=1	unknown	PM	0.398725	unknown
O75616	0.208441	0.616261	0.0697617	0.0256455	0.0149206	0.0105511	0.00799404	0.0156902	0.0219464	0.00878848	0.236139	0.377472	0.0958433	0.040594	0.0434148	0.0333636	0.0507749	0.0559626	0.0480514	0.018384	0.315013	0.391243	0.112245	0.035846	0.0270546	0.0214395	0.0159946	0.0267143	0.020929	0.0335205	O75616	GTPase Era mitochondrial OS=Homo sapiens OX=9606 GN=ERAL1 PE=1 SV=2	unknown	MITOCHONDRIA	0.882127	unknown
P13807	0.0146632	0.0479788	0.0330983	0.0469222	0.0566384	0.0500425	0.0625926	0.274582	0.353803	0.0596797	0.0284217	0.0409114	0.0535873	0.0469942	0.0728807	0.063639	0.086067	0.221137	0.232233	0.154128	0.0169953	0.0236804	0.0267913	0.0301687	0.0414376	0.0534937	0.0697779	0.341506	0.338821	0.0573282	P13807	Glycogen [starch] synthase muscle OS=Homo sapiens OX=9606 GN=GYS1 PE=1 SV=2	unknown	NUCLEUS	0.596223	unknown
Q9BYD2	0.209698	0.670968	0.0623455	0.0102355	0.00884764	0.00620202	0.00290584	0.00936809	0.0138353	0.00559483	0.28385	0.476452	0.103499	0.0274944	0.0176228	0.015526	0.0141595	0.0289551	0.0218871	0.0105548	0.333876	0.389584	0.111323	0.0294929	0.0241884	0.021548	0.0144518	0.0280076	0.0303416	0.0171865	Q9BYD2	39S ribosomal protein L9 mitochondrial OS=Homo sapiens OX=9606 GN=MRPL9 PE=1 SV=2	unknown	MITOCHONDRIA	0.943998	unknown
Q9NQZ5	0.155941	0.25933	0.0851104	0.0548363	0.0738766	0.0660701	0.062262	0.050457	0.0565499	0.135567	0.136296	0.222469	0.104198	0.0590123	0.0958025	0.108889	0.0782716	0.0291358	0.0414815	0.124444	0.147982	0.161231	0.0819405	0.0599266	0.0746025	0.0892784	0.0397472	0.0686914	0.0648186	0.211781	Q9NQZ5	StAR-related lipid transfer protein 7 mitochondrial OS=Homo sapiens OX=9606 GN=STARD7 PE=1 SV=2	unknown	NUCLEUS-CHROMATIN	0.50068	unknown
Q9H2K0	0.203874	0.6741	0.0633406	0.00333372	0.0104035	0.0107484	0.00603518	0.00666743	0.0133349	0.00816186	0.295779	0.502539	0.10219	0.0168201	0.0120597	0.0122183	0.015868	0.0190416	0.0131704	0.0103142	0.170795	0.202477	0.0817382	0.0506705	0.0667417	0.0745726	0.0663323	0.106459	0.0904391	0.0897738	Q9H2K0	Translation initiation factor IF-3 mitochondrial OS=Homo sapiens OX=9606 GN=MTIF3 PE=1 SV=4	unknown	MITOCHONDRIA	0.414511	unknown
Q96D53	0.223166	0.625605	0.0685679	0.0150897	0.0138559	0.00949037	0.00654835	0.0132865	0.014283	0.0101072	0.27627	0.444214	0.106897	0.025328	0.0110404	0.0158462	0.019483	0.028705	0.0216911	0.050526	0.358255	0.366044	0.105919	0.0238837	0.0275182	0.0384216	0.0218069	0.0207684	0.0129803	0.0244029	Q96D53	Atypical kinase COQ8B mitochondrial OS=Homo sapiens OX=9606 GN=COQ8B PE=1 SV=2	unknown	MITOCHONDRIA	0.943865	unknown
P60709	0.151883	0.150019	0.0815054	0.104835	0.0972825	0.0601543	0.0516249	0.0276895	0.0404676	0.234538	0.116062	0.114871	0.112241	0.0979896	0.101643	0.0802575	0.0665525	0.0457528	0.0350062	0.229624	0.133234	0.114877	0.092739	0.0764163	0.08164	0.0886016	0.0424773	0.0518849	0.0353	0.28283	P60709	Actin cytoplasmic 1 OS=Homo sapiens OX=9606 GN=ACTB PE=1 SV=1	unknown	CYTOSOL	0.497037	unknown
Q8NE86	0.234131	0.563427	0.100616	0.0313856	0.0128166	0.0126148	0.0103946	0.00302755	0.0103946	0.0211929	0.240223	0.449701	0.13241	0.0666557	0.038862	0.0228745	0.0146757	0.0152497	0.00860867	0.0107403	0.312407	0.386725	0.10732	0.0270471	0.0248139	0.0275434	0.0300248	0.0296526	0.024938	0.0295285	Q8NE86	Calcium uniporter protein mitochondrial OS=Homo sapiens OX=9606 GN=MCU PE=1 SV=1	unknown	MITOCHONDRIA	0.927091	unknown
P19174-2	0.0369458	0.127017	0.0749108	0.109733	0.111772	0.107822	0.0662477	0.102854	0.101367	0.16133	0.0377426	0.0662021	0.0816908	0.0782828	0.105979	0.112643	0.108853	0.13159	0.10748	0.169536	0.0354882	0.0558899	0.0626124	0.0733213	0.10709	0.132103	0.0522161	0.0842648	0.0773861	0.319628	P19174-2	Isoform 2 of 1-phosphatidylinositol 45-bisphosphate phosphodiesterase gamma-1 OS=Homo sapiens OX=9606 GN=PLCG1	unknown	CYTOSOL	0.786951	unknown
Q8WWC4	0.259978	0.554045	0.0772384	0.0448759	0.0157497	0.00539374	0.00496224	0.00496224	0.015534	0.01726	0.309288	0.535318	0.114038	0.0112395	0.00913571	0.00639788	0.00504337	0.0040347	0.00270901	0.00279547	0.374308	0.440651	0.109791	0.0185101	0.0134709	0.0117845	0.00734054	0.00851106	0.00603115	0.00960222	Q8WWC4	m-AAA protease-interacting protein 1 mitochondrial OS=Homo sapiens OX=9606 GN=MAIP1 PE=1 SV=1	unknown	MITOCHONDRIA	0.943464	unknown
P42167	0.223684	0.232829	0.0872648	0.173976	0.134205	0.0724527	0.0300986	0.0193717	0.0175531	0.00856571	0.268805	0.12474	0.116497	0.139544	0.162633	0.0904847	0.0699401	0.0145516	0.00717064	0.00563558	0.291611	0.168156	0.109438	0.110438	0.128882	0.095789	0.0551679	0.0177908	0.0070184	0.0157098	P42167	Lamina-associated polypeptide 2 isoforms beta/gamma OS=Homo sapiens OX=9606 GN=TMPO PE=1 SV=2	unknown	PM	0.406347	unknown
C9J9T0	0.031477	0.0948345	0.079096	0.0706215	0.115012	0.0564972	0.112187	0.047619	0.0645682	0.328087	0.0513427	0.0841074	0.110285	0.0898497	0.166019	0.153352	0.116534	0.0815741	0.0510049	0.0959297	0.0475059	0.0754157	0.0908551	0.107779	0.116983	0.172209	0.0813539	0.111639	0.0697743	0.126485	C9J9T0	Ribulose-5-phosphate-3-epimerase isoform CRA_a OS=Homo sapiens OX=9606 GN=RPE PE=1 SV=1	unknown	CYTOSOL	0.786446	unknown
Q9Y2Q9	0.236482	0.636778	0.0613735	0.00667351	0.0115788	0.00889802	0.00462012	0.00998175	0.0128907	0.0107232	0.269173	0.465426	0.100704	0.0416143	0.0262761	0.0170983	0.0137038	0.0181041	0.0203671	0.0275333	0.287321	0.360356	0.0959684	0.026877	0.0277534	0.0327198	0.0222027	0.0430909	0.0378323	0.0658779	Q9Y2Q9	28S ribosomal protein S28 mitochondrial OS=Homo sapiens OX=9606 GN=MRPS28 PE=1 SV=1	unknown	MITOCHONDRIA	0.931588	unknown
Q96E29	0.247937	0.639832	0.0623055	0.00588554	0.00744148	0.00737383	0.00351779	0.00777973	0.01353	0.00439724	0.240182	0.412528	0.0934761	0.0227199	0.0438169	0.0262902	0.0331061	0.0412204	0.0314833	0.0551769	0.273754	0.395737	0.105804	0.0511043	0.0313303	0.0251669	0.0154083	0.039548	0.029019	0.0331279	Q96E29	Transcription termination factor 3 mitochondrial OS=Homo sapiens OX=9606 GN=MTERF3 PE=1 SV=2	unknown	MITOCHONDRIA	0.895739	unknown
Q9H6U8	0.0685853	0.227407	0.0902367	0.283755	0.213556	0.0395374	0.0244755	0.0166756	0.0185584	0.0172136	0.056434	0.11697	0.157592	0.174727	0.17691	0.107112	0.0756864	0.0429375	0.0263315	0.0652994	0.0647851	0.0843489	0.135985	0.152983	0.15619	0.135022	0.0702373	0.0805003	0.0615779	0.0583708	Q9H6U8	Alpha-12-mannosyltransferase ALG9 OS=Homo sapiens OX=9606 GN=ALG9 PE=1 SV=2	unknown	ER	0.567954	unknown
P54136	0.0293534	0.0975401	0.0741246	0.117802	0.111727	0.0702938	0.0479106	0.0725478	0.176599	0.202102	0.0342043	0.0659485	0.0885763	0.0839281	0.110313	0.0865336	0.0737588	0.0843897	0.12531	0.247038	0.0293428	0.0472948	0.0664682	0.068917	0.0793864	0.0903042	0.045149	0.101732	0.223179	0.248227	P54136	Arginine--tRNA ligase cytoplasmic OS=Homo sapiens OX=9606 GN=RARS PE=1 SV=2	unknown	CYTOSOL	0.389478	unknown
Q07021	0.294647	0.492538	0.113253	0.033435	0.0139353	0.00831231	0.00710947	0.0117252	0.013818	0.0112265	0.295676	0.474803	0.121527	0.0357454	0.0167282	0.0120718	0.0124112	0.011654	0.0110709	0.00831186	0.340355	0.447236	0.108788	0.032739	0.0168179	0.0117718	0.00788078	0.0114222	0.00997827	0.0130105	Q07021	Complement component 1 Q subcomponent-binding protein mitochondrial OS=Homo sapiens OX=9606 GN=C1QBP PE=1 SV=1	unknown	MITOCHONDRIA	0.934814	unknown
Q9P015	0.215845	0.6313	0.0618902	0.0121775	0.0105881	0.00926764	0.00755594	0.0170192	0.0213474	0.0130089	0.293507	0.48942	0.103803	0.0172876	0.0119212	0.0119212	0.0105796	0.0197025	0.0147577	0.0271006	0.365232	0.425942	0.106124	0.00728643	0.0146671	0.0134736	0.00901382	0.016206	0.0260678	0.0159862	Q9P015	39S ribosomal protein L15 mitochondrial OS=Homo sapiens OX=9606 GN=MRPL15 PE=1 SV=1	unknown	MITOCHONDRIA	0.94545	unknown
Q6N069	0.0306575	0.107705	0.0536507	0.113957	0.144615	0.124647	0.11073	0.139976	0.111335	0.0627269	0.0398157	0.0618625	0.0804541	0.0774926	0.112702	0.109905	0.149556	0.176209	0.107108	0.0848963	0.0331147	0.0391689	0.0482961	0.0675136	0.109113	0.141357	0.161354	0.189057	0.114801	0.0962253	Q6N069	N-alpha-acetyltransferase 16 NatA auxiliary subunit OS=Homo sapiens OX=9606 GN=NAA16 PE=1 SV=2	unknown	RIBOSOME	0.67073	unknown
C9JJ19	0.262537	0.625215	0.0603282	0.00496404	0.0104346	0.00420423	0.0014183	0.0108398	0.0129166	0.00714213	0.284637	0.511794	0.121546	0.0321987	0.0098988	0.00540938	0.00647654	0.00842686	0.00872125	0.0108924	0.36394	0.411159	0.124005	0.0272287	0.0151456	0.0088535	0.00623643	0.0143104	0.0182638	0.0108581	C9JJ19	28S ribosomal protein S34 mitochondrial OS=Homo sapiens OX=9606 GN=MRPS34 PE=1 SV=2	unknown	MITOCHONDRIA	0.942176	unknown
Q8IYB8	0.199812	0.572518	0.0659785	0.0327254	0.0227553	0.0164213	0.0160108	0.0231071	0.029617	0.0210545	0.322306	0.473056	0.103001	0.00818554	0.00750341	0.0180764	0.0170532	0.0197817	0.0231924	0.00784447	0.32241	0.361029	0.121983	0.0398255	0.0337913	0.021166	0.0204233	0.0268288	0.0246008	0.0279428	Q8IYB8	ATP-dependent RNA helicase SUPV3L1 mitochondrial OS=Homo sapiens OX=9606 GN=SUPV3L1 PE=1 SV=1	unknown	MITOCHONDRIA	0.943973	unknown
P36639	0.0438111	0.132003	0.0758958	0.10114	0.115065	0.0897394	0.0568404	0.0282573	0.0359121	0.321336	0.0710322	0.129486	0.130966	0.106918	0.140215	0.0958195	0.116167	0.0810211	0.0599334	0.0684425	0.0625804	0.0838378	0.0912254	0.101139	0.126162	0.159525	0.0731138	0.113722	0.0624851	0.126209	P36639	78-dihydro-8-oxoguanine triphosphatase OS=Homo sapiens OX=9606 GN=NUDT1 PE=1 SV=3	unknown	CYTOSOL	0.797721	unknown
Q02809	0.0437939	0.25645	0.146571	0.27622	0.143465	0.0571917	0.0214448	0.0254976	0.0195105	0.00985572	0.0559536	0.159884	0.200082	0.224689	0.183112	0.0851639	0.0509644	0.0196969	0.0102701	0.0101834	0.0756319	0.152295	0.195467	0.191595	0.164429	0.10093	0.0460483	0.0264786	0.0190999	0.0280254	Q02809	Procollagen-lysine2-oxoglutarate 5-dioxygenase 1 OS=Homo sapiens OX=9606 GN=PLOD1 PE=1 SV=2	unknown	PEROXISOME	0.461218	unknown
Q92667	0.13873	0.394958	0.118242	0.125939	0.0736967	0.0397486	0.0198929	0.0308991	0.0362906	0.0216033	0.158704	0.317363	0.151751	0.109323	0.0931456	0.0506284	0.04274	0.0302612	0.0213031	0.0247794	0.190852	0.265672	0.150141	0.0959075	0.087273	0.0655439	0.0399615	0.0389624	0.0318265	0.0338602	Q92667	A-kinase anchor protein 1 mitochondrial OS=Homo sapiens OX=9606 GN=AKAP1 PE=1 SV=1	unknown	NUCLEUS-CHROMATIN	0.181078	unknown
P82664	0.204159	0.567686	0.0943595	0.0478011	0.0200765	0.0133843	0.00869981	0.0113767	0.0196463	0.0128107	0.313212	0.483871	0.119278	0.0265598	0.013135	0.00743674	0.010141	0.012459	0.00453931	0.00936836	0.298423	0.423809	0.0953	0.0265084	0.0304114	0.0230932	0.0157749	0.0224427	0.0278094	0.0364287	P82664	28S ribosomal protein S10 mitochondrial OS=Homo sapiens OX=9606 GN=MRPS10 PE=1 SV=2	unknown	MITOCHONDRIA	0.944906	unknown
Q9BW92	0.239183	0.575956	0.0726035	0.0179675	0.0185961	0.0133054	0.0072813	0.0188057	0.0224201	0.0138816	0.277108	0.310473	0.0834106	0.0352178	0.0417053	0.0352178	0.0630213	0.0639481	0.0565338	0.0333642	0.279444	0.330833	0.126944	0.0236111	0.0341667	0.0344444	0.0194444	0.05	0.0313889	0.0697222	Q9BW92	Threonine--tRNA ligase mitochondrial OS=Homo sapiens OX=9606 GN=TARS2 PE=1 SV=1	unknown	MITOCHONDRIA	0.773892	unknown
P55084	0.20131	0.673456	0.066804	0.0124164	0.00868486	0.00688184	0.00439196	0.00906131	0.010653	0.00634027	0.303541	0.511927	0.113144	0.0143331	0.0108669	0.00694719	0.00915566	0.0135726	0.00820499	0.00830737	0.344328	0.43685	0.107796	0.0166269	0.0154813	0.0172792	0.0122355	0.0212888	0.014829	0.0132856	P55084	Trifunctional enzyme subunit beta mitochondrial OS=Homo sapiens OX=9606 GN=HADHB PE=1 SV=3	unknown	MITOCHONDRIA	0.939774	unknown
Q86Y56	0.036919	0.0821643	0.0604787	0.0758192	0.0971836	0.0818162	0.0690191	0.110757	0.156591	0.229251	0.0429588	0.0561287	0.0685073	0.0604471	0.0838951	0.0942416	0.09643	0.119673	0.123591	0.254128	0.0382354	0.0506685	0.0567483	0.0582209	0.0777015	0.103062	0.058873	0.106544	0.123615	0.326331	Q86Y56	Dynein assembly factor 5 axonemal OS=Homo sapiens OX=9606 GN=DNAAF5 PE=1 SV=4	unknown	CYTOSOL	0.744191	unknown
P14868	0.025476	0.112373	0.0736547	0.12934	0.10784	0.0715117	0.0383401	0.0797745	0.20127	0.16042	0.0348924	0.065803	0.0872411	0.0896679	0.110657	0.0873074	0.0739959	0.0929512	0.156322	0.201161	0.0286928	0.0490928	0.0599494	0.0726581	0.0799098	0.088119	0.0416266	0.109461	0.268877	0.201614	P14868	Aspartate--tRNA ligase cytoplasmic OS=Homo sapiens OX=9606 GN=DARS PE=1 SV=2	unknown	PROTEASOME	0.367123	unknown
P48047	0.204948	0.659307	0.0644784	0.0226883	0.00995917	0.00834201	0.00629253	0.00810183	0.0103434	0.00553999	0.293514	0.473244	0.119828	0.0380431	0.0185034	0.00838823	0.00967113	0.0148274	0.0117682	0.0122123	0.359906	0.432894	0.103951	0.0134621	0.018086	0.0191981	0.0118232	0.014223	0.0107112	0.0157448	P48047	ATP synthase subunit O mitochondrial OS=Homo sapiens OX=9606 GN=ATP5O PE=1 SV=1	unknown	MITOCHONDRIA	0.942062	unknown
Q15057	0.0729006	0.112964	0.0710596	0.114173	0.125192	0.0949934	0.0949384	0.144812	0.116015	0.0529512	0.0822786	0.0774428	0.0782758	0.0842454	0.117078	0.111062	0.136398	0.13545	0.108656	0.0691131	0.0766788	0.0681785	0.066687	0.0733108	0.0995333	0.118988	0.107039	0.145226	0.113711	0.130647	Q15057	Arf-GAP with coiled-coil ANK repeat and PH domain-containing protein 2 OS=Homo sapiens OX=9606 GN=ACAP2 PE=1 SV=3	unknown	NUCLEUS	0.808473	unknown
Q6L8Q7	0.115653	0.323357	0.0665597	0.0626416	0.0632081	0.0527285	0.0372923	0.025727	0.0341767	0.218656	0.116928	0.206218	0.0954026	0.0576668	0.077013	0.077704	0.0612277	0.0443795	0.0386394	0.224821	0.12762	0.143737	0.0831139	0.0558833	0.0682082	0.0837986	0.0477194	0.0733172	0.0561466	0.260455	Q6L8Q7	2'5'-phosphodiesterase 12 OS=Homo sapiens OX=9606 GN=PDE12 PE=1 SV=2	unknown	NUCLEUS-CHROMATIN	0.359203	unknown
P41252	0.0247817	0.0989918	0.074869	0.125728	0.110346	0.0807792	0.0432515	0.0812194	0.181905	0.178129	0.0306179	0.0585909	0.0853615	0.0780398	0.102646	0.0859992	0.0716033	0.0894318	0.137167	0.260542	0.0259591	0.0440718	0.0557567	0.0617344	0.0754934	0.0868815	0.0394409	0.100836	0.251673	0.258153	P41252	Isoleucine--tRNA ligase cytoplasmic OS=Homo sapiens OX=9606 GN=IARS PE=1 SV=2	unknown	CYTOSOL	0.278744	unknown
Q9NWU5	0.195233	0.577874	0.0780055	0.0316595	0.0201389	0.0167092	0.0094099	0.015478	0.032451	0.0230411	0.248356	0.448167	0.111006	0.0308025	0.0239125	0.0216158	0.0251283	0.0390885	0.0307575	0.0211655	0.320751	0.359531	0.11446	0.0328638	0.0229108	0.0244131	0.018216	0.0388732	0.0361502	0.031831	Q9NWU5	39S ribosomal protein L22 mitochondrial OS=Homo sapiens OX=9606 GN=MRPL22 PE=1 SV=1	unknown	MITOCHONDRIA	0.941303	unknown
P12532	0.21791	0.522034	0.0706994	0.0241561	0.0251162	0.0222357	0.0208712	0.0501819	0.0360825	0.0107136	0.253064	0.441841	0.104474	0.0244117	0.0213602	0.0241531	0.0331006	0.0490303	0.0343936	0.0141712	0.298656	0.38795	0.0797573	0.0238405	0.041179	0.0420459	0.0368444	0.0390117	0.0151712	0.035544	P12532	Creatine kinase U-type mitochondrial OS=Homo sapiens OX=9606 GN=CKMT1A PE=1 SV=1	unknown	MITOCHONDRIA	0.898325	unknown
O00469-2	0.0419505	0.211405	0.161845	0.287804	0.16938	0.078595	0.0231893	0.00817876	0.00745316	0.0101993	0.0518718	0.139719	0.194821	0.234335	0.19363	0.0989431	0.0612959	0.00774506	0.00537311	0.0122663	0.0626012	0.132706	0.174485	0.203866	0.188446	0.129843	0.0543807	0.0174965	0.0105076	0.0256685	O00469-2	Isoform 2 of Procollagen-lysine2-oxoglutarate 5-dioxygenase 2 OS=Homo sapiens OX=9606 GN=PLOD2	unknown	ER	0.751704	unknown
Q969S9	0.245641	0.559296	0.0706025	0.0378042	0.0226135	0.0146729	0.00845848	0.0110478	0.00983946	0.0200242	0.259657	0.442676	0.122671	0.0413427	0.0230779	0.0273973	0.020116	0.0250524	0.0128348	0.0251759	0.291614	0.429067	0.117591	0.0192308	0.0201765	0.0258512	0.0129256	0.0167087	0.017024	0.0498108	Q969S9	Ribosome-releasing factor 2 mitochondrial OS=Homo sapiens OX=9606 GN=GFM2 PE=1 SV=1	unknown	MITOCHONDRIA	0.943447	unknown
Q8IXM3	0.181743	0.670424	0.0761685	0.0122687	0.00917722	0.0085443	0.00647517	0.0108325	0.0149464	0.00942064	0.290418	0.480765	0.105617	0.0197663	0.0212414	0.0157541	0.014987	0.0166391	0.0172292	0.0175832	0.357196	0.39279	0.100074	0.0301928	0.0180247	0.0146131	0.00966623	0.0256439	0.0271223	0.0246773	Q8IXM3	39S ribosomal protein L41 mitochondrial OS=Homo sapiens OX=9606 GN=MRPL41 PE=1 SV=1	unknown	MITOCHONDRIA	0.940425	unknown
Q9GZT3	0.17886	0.627811	0.0699032	0.0231038	0.0169446	0.0115385	0.0100323	0.00933297	0.0158687	0.0366057	0.314004	0.472867	0.120529	0.0444035	0.0141629	0.00567238	0.00682853	0.00852663	0.00672014	0.00628658	0.342432	0.480262	0.0905224	0.0230092	0.0172408	0.0113757	0.00422158	0.0115691	0.0103445	0.00902323	Q9GZT3	SRA stem-loop-interacting RNA-binding protein mitochondrial OS=Homo sapiens OX=9606 GN=SLIRP PE=1 SV=1	unknown	MITOCHONDRIA	0.920151	unknown
P42166	0.30593	0.275027	0.0651293	0.106799	0.0864403	0.0496666	0.0325425	0.0300614	0.03015	0.0182539	0.368655	0.133067	0.0857627	0.0951736	0.109303	0.0712389	0.0603954	0.0379459	0.02149	0.0169685	0.324971	0.168653	0.0895381	0.0817068	0.11547	0.0847493	0.0505464	0.0331704	0.021407	0.0297875	P42166	Lamina-associated polypeptide 2 isoform alpha OS=Homo sapiens OX=9606 GN=TMPO PE=1 SV=2	unknown	NUCLEUS-CHROMATIN	0.554361	unknown
A2IDC6	0.229693	0.611543	0.0761757	0.0237077	0.0134085	0.00349786	0.00408084	0.0132141	0.0176836	0.00699572	0.266358	0.49861	0.113364	0.0277713	0.0159907	0.0118965	0.0134029	0.0249903	0.0134801	0.0141367	0.316456	0.468861	0.083038	0.0035443	0.0187342	0.0258228	0.0108861	0.0278481	0.0202532	0.024557	A2IDC6	39S ribosomal protein L28 mitochondrial (Fragment) OS=Homo sapiens OX=9606 GN=MRPL28 PE=1 SV=1	unknown	MITOCHONDRIA	0.936449	unknown
P07954	0.168892	0.437058	0.0732214	0.0509883	0.0440987	0.0374214	0.023785	0.0183697	0.0290493	0.117116	0.208019	0.32491	0.110809	0.0486776	0.0636896	0.053351	0.0489381	0.0330846	0.028331	0.0801893	0.204083	0.258712	0.0927246	0.0524527	0.0591923	0.074867	0.0322022	0.0469032	0.0351361	0.143726	P07954	Fumarate hydratase mitochondrial OS=Homo sapiens OX=9606 GN=FH PE=1 SV=3	unknown	NUCLEUS-CHROMATIN	0.302718	unknown
P38646	0.317634	0.531246	0.0950642	0.0154462	0.00846927	0.00702696	0.00473679	0.00510597	0.00547515	0.00979582	0.304135	0.495029	0.113171	0.0231367	0.013673	0.00964675	0.00964324	0.0120013	0.00815804	0.0114065	0.354508	0.411283	0.12789	0.0294684	0.0159743	0.0116613	0.00820812	0.01013	0.00791693	0.0229594	P38646	Stress-70 protein mitochondrial OS=Homo sapiens OX=9606 GN=HSPA9 PE=1 SV=2	unknown	MITOCHONDRIA	0.944517	unknown
P10809	0.306322	0.528669	0.0913367	0.0227844	0.0108681	0.00847078	0.00597137	0.00710643	0.00835488	0.0101161	0.322881	0.487419	0.115775	0.0264874	0.0122278	0.00798344	0.0067881	0.00713641	0.00462171	0.00868006	0.337524	0.448573	0.111176	0.0302486	0.0171614	0.0128959	0.0063644	0.00946946	0.00769353	0.0188939	P10809	60 kDa heat shock protein mitochondrial OS=Homo sapiens OX=9606 GN=HSPD1 PE=1 SV=2	unknown	MITOCHONDRIA	0.944722	unknown
P68032	0.142222	0.154083	0.0877367	0.110918	0.110299	0.0681821	0.0569967	0.031382	0.036372	0.201809	0.12406	0.12741	0.118118	0.107882	0.0997912	0.0904202	0.0796949	0.0423857	0.0412105	0.169027	0.148867	0.126709	0.101087	0.0865354	0.0883591	0.101167	0.0477466	0.0578289	0.0371541	0.204546	P68032	Actin alpha cardiac muscle 1 OS=Homo sapiens OX=9606 GN=ACTC1 PE=1 SV=1	unknown	CYTOSOL	0.399188	unknown
Q9Y3B7	0.207428	0.674401	0.0597191	0.00288927	0.00977908	0.00786772	0.0056452	0.00931235	0.0142241	0.0087345	0.31555	0.47575	0.104033	0.0159042	0.0186132	0.0115131	0.0127583	0.0159261	0.0171932	0.0127583	0.364405	0.396969	0.102786	0.0163961	0.0204788	0.0197929	0.0123787	0.0199889	0.0254434	0.0213607	Q9Y3B7	39S ribosomal protein L11 mitochondrial OS=Homo sapiens OX=9606 GN=MRPL11 PE=1 SV=1	unknown	MITOCHONDRIA	0.941303	unknown
Q14CX7	0.0316956	0.0836355	0.0631595	0.13702	0.15612	0.147804	0.12531	0.149808	0.0903155	0.0151321	0.0406792	0.0663899	0.071249	0.0916538	0.127604	0.135647	0.211569	0.15849	0.0745816	0.0221362	0.0322684	0.0478497	0.0521561	0.0863885	0.126979	0.166398	0.199241	0.172697	0.0941574	0.0218663	Q14CX7	N-alpha-acetyltransferase 25 NatB auxiliary subunit OS=Homo sapiens OX=9606 GN=NAA25 PE=1 SV=1	unknown	RIBOSOME	0.323005	unknown
P52209	0.0389069	0.0950982	0.0520897	0.0914017	0.093866	0.0694248	0.058335	0.108349	0.143238	0.249291	0.0508736	0.0559048	0.0701488	0.0672216	0.100414	0.0784209	0.102466	0.141735	0.10504	0.227775	0.0353543	0.0558711	0.0580363	0.0803724	0.0956801	0.147922	0.0523215	0.0830434	0.0699542	0.321445	P52209	6-phosphogluconate dehydrogenase decarboxylating OS=Homo sapiens OX=9606 GN=PGD PE=1 SV=3	unknown	CYTOSOL	0.779475	unknown
Q9BUB7	0.255849	0.478491	0.0792453	0.0369811	0.0158491	0.0181132	0.0226415	0.0362264	0.0226415	0.0339623	0.274431	0.44677	0.134486	0.066788	0.0183803	0.0127389	0.0103731	0.0120109	0.0078253	0.0161965	0.286635	0.479296	0.0852963	0.0362013	0.0257873	0.0267791	0.0128936	0.0138854	0.0168609	0.016365	Q9BUB7	Transmembrane protein 70 mitochondrial OS=Homo sapiens OX=9606 GN=TMEM70 PE=1 SV=2	unknown	MITOCHONDRIA	0.901499	unknown
Q9Y3D9	0.199755	0.688749	0.0665615	0.0123379	0.00602874	0.00469681	0.00280407	0.00396074	0.00911321	0.00599369	0.313094	0.506762	0.108655	0.0241887	0.00967548	0.00646209	0.00711536	0.00909284	0.0101169	0.00483774	0.350761	0.439641	0.108212	0.0317161	0.0147926	0.0121367	0.00583676	0.0123838	0.0132794	0.0112412	Q9Y3D9	28S ribosomal protein S23 mitochondrial OS=Homo sapiens OX=9606 GN=MRPS23 PE=1 SV=2	unknown	MITOCHONDRIA	0.931785	unknown
P50416	0.121832	0.343962	0.128377	0.164219	0.127768	0.0598128	0.0234	0.0117571	0.00871319	0.010159	0.138287	0.289877	0.164331	0.140601	0.118473	0.0728099	0.0534285	0.0103829	0.00627298	0.00553753	0.152285	0.231144	0.14849	0.123402	0.120326	0.102389	0.0471796	0.0277245	0.022651	0.0244088	P50416	Carnitine O-palmitoyltransferase 1 liver isoform OS=Homo sapiens OX=9606 GN=CPT1A PE=1 SV=2	unknown	PM	0.235554	unknown
P82933	0.176175	0.687272	0.0704606	0.018766	0.00998192	0.00716349	0.0030298	0.00925382	0.0137868	0.0041102	0.288796	0.512485	0.11463	0.0228938	0.0133627	0.0103682	0.00888703	0.0103038	0.0109156	0.00735756	0.353683	0.430811	0.105329	0.0234334	0.0189891	0.0160398	0.00808048	0.0147469	0.0156357	0.013252	P82933	28S ribosomal protein S9 mitochondrial OS=Homo sapiens OX=9606 GN=MRPS9 PE=1 SV=2	unknown	MITOCHONDRIA	0.931371	unknown
Q9UGQ3	0.0503852	0.294433	0.189248	0.237988	0.11393	0.0507315	0.0313393	0.0174011	0.00813782	0.00640637	0.0533107	0.241788	0.264208	0.192258	0.11001	0.051877	0.0542231	0.0145985	0.00456204	0.0131648	0.0690909	0.195152	0.300606	0.152727	0.0933333	0.0618182	0.0351515	0.030303	0.0254545	0.0363636	Q9UGQ3	Solute carrier family 2 facilitated glucose transporter member 6 OS=Homo sapiens OX=9606 GN=SLC2A6 PE=1 SV=2	unknown	LYSOSOME	0.589216	unknown
P35527	0.128968	0.123497	0.114967	0.0926084	0.0455918	0.0978895	0.038905	0.108262	0.0870234	0.162288	0.168551	0.116399	0.150749	0.0845042	0.110862	0.126124	0.0620895	0.0462004	0.0295249	0.104995	0.102515	0.0979819	0.065955	0.0780199	0.101784	0.128254	0.171834	0.101053	0.0557912	0.0968119	P35527	Keratin type I cytoskeletal 9 OS=Homo sapiens OX=9606 GN=KRT9 PE=1 SV=3	unknown	NUCLEUS	0.244736	unknown
P08779	0.145762	0.158684	0.107771	0.135165	0.053756	0.0422984	0.055479	0.118194	0.0931254	0.0897657	0.0901279	0.409968	0.0942333	0.0138438	0.0442524	0.0381421	0.0364713	0.0442047	0.0348959	0.193861	0.206749	0.123739	0.0799069	0.0438324	0.0919317	0.0632273	0.0349108	0.148177	0.116757	0.090768	P08779	Keratin type I cytoskeletal 16 OS=Homo sapiens OX=9606 GN=KRT16 PE=1 SV=4	unknown	NUCLEUS-CHROMATIN	0.389678	unknown
Q8WVM0	0.22974	0.594719	0.0712505	0.0270994	0.0151082	0.00817748	0.00913091	0.0166483	0.0211955	0.00693069	0.170538	0.301807	0.112227	0.0566367	0.0779801	0.0544047	0.0602637	0.0576829	0.0424775	0.0659831	0.306496	0.363973	0.115667	0.038009	0.0198246	0.025886	0.0218213	0.0305213	0.0310918	0.046709	Q8WVM0	Dimethyladenosine transferase 1 mitochondrial OS=Homo sapiens OX=9606 GN=TFB1M PE=1 SV=1	unknown	MITOCHONDRIA	0.631868	unknown
Q9UJZ1	0.302591	0.520042	0.099213	0.0219246	0.0152699	0.009011	0.00715173	0.00895577	0.00889134	0.00694924	0.312513	0.51126	0.125858	0.0220798	0.00751623	0.0049161	0.00512923	0.00599594	0.00218809	0.0025433	0.355198	0.434414	0.125845	0.0222593	0.0158772	0.0142491	0.00729385	0.00821861	0.00699428	0.00965133	Q9UJZ1	Stomatin-like protein 2 mitochondrial OS=Homo sapiens OX=9606 GN=STOML2 PE=1 SV=1	unknown	MITOCHONDRIA	0.939312	unknown
Q9BZE1	0.250905	0.599077	0.0692902	0.0133691	0.0117697	0.00703163	0.00425519	0.0121016	0.0196161	0.0125845	0.215133	0.34708	0.0928787	0.0360275	0.0500367	0.0375207	0.0411859	0.0359732	0.0285342	0.11563	0.339839	0.38835	0.112055	0.0407396	0.0231883	0.0154162	0.00811376	0.019473	0.0236153	0.0292095	Q9BZE1	39S ribosomal protein L37 mitochondrial OS=Homo sapiens OX=9606 GN=MRPL37 PE=1 SV=2	unknown	MITOCHONDRIA	0.801357	unknown
O95881	0.0418622	0.178664	0.169552	0.258903	0.182344	0.0741837	0.0433614	0.0192955	0.0108452	0.0209895	0.0534953	0.128024	0.169616	0.231396	0.215683	0.100092	0.0660858	0.0162537	0.00867919	0.0106743	0.0631633	0.119789	0.161477	0.194704	0.194621	0.142154	0.0724527	0.0274128	0.00798593	0.0162408	O95881	Thioredoxin domain-containing protein 12 OS=Homo sapiens OX=9606 GN=TXNDC12 PE=1 SV=10	ER	ER	1	ER
Q53EP0	0.056066	0.231658	0.1486	0.254128	0.166475	0.073295	0.0288586	0.0133525	0.0185212	0.00904523	0.0595243	0.132839	0.178049	0.214619	0.196291	0.109623	0.0726598	0.015012	0.0117827	0.0096007	0.0676404	0.124945	0.156601	0.183574	0.188521	0.146412	0.0773285	0.0252658	0.0137813	0.015931	Q53EP0	Fibronectin type III domain-containing protein 3B OS=Homo sapiens OX=9606 GN=FNDC3B PE=1 SV=20	ER	ER	1	ER
O15066	0.0301065	0.126911	0.0544659	0.0984393	0.0978066	0.0970157	0.0855742	0.174206	0.144469	0.091005	0.043737	0.0557209	0.0672419	0.0693907	0.100251	0.0955734	0.122467	0.184155	0.145476	0.115987	0.0461787	0.0513937	0.0492034	0.0626842	0.0889416	0.118406	0.0819796	0.157154	0.132461	0.211598	O15066	Kinesin-like protein KIF3B OS=Homo sapiens OX=9606 GN=KIF3B PE=1 SV=10	unknown	NUCLEUS	0.846798	unknown
O60942	0.0239753	0.0951276	0.0533643	0.0742459	0.0974478	0.0982212	0.070379	0.221964	0.211137	0.0541377	0.045042	0.0545978	0.0559424	0.0671789	0.0903241	0.0778872	0.129796	0.259496	0.176663	0.0430732	0.0629122	0.0575799	0.0511249	0.0640348	0.0879368	0.114084	0.120819	0.195379	0.141915	0.104214	O60942	mRNA-capping enzyme OS=Homo sapiens OX=9606 GN=RNGTT PE=1 SV=10	unknown	NUCLEUS	0.929668	NUCLEUS
Q00577	0.030292	0.102448	0.0677935	0.100872	0.122198	0.146492	0.125651	0.182843	0.111717	0.00969344	0.0315736	0.0493939	0.0572922	0.0690217	0.10256	0.0995736	0.18504	0.24748	0.138633	0.0194314	0.0285627	0.0385793	0.0419911	0.0685854	0.108805	0.14605	0.147231	0.276901	0.124923	0.0183711	Q00577	Transcriptional activator protein Pur-alpha OS=Homo sapiens OX=9606 GN=PURA PE=1 SV=20	unknown	RIBOSOME	0.720679	unknown
Q9UGI8	0.0489475	0.154302	0.079078	0.108245	0.117763	0.0926834	0.0759394	0.0544218	0.0767277	0.191892	0.0452381	0.0688028	0.0816199	0.0686916	0.123164	0.117	0.0960614	0.0886293	0.0820872	0.228705	0.0575684	0.0648581	0.0785644	0.0739704	0.0965611	0.124648	0.0557364	0.0840318	0.0726415	0.29142	Q9UGI8	Testin OS=Homo sapiens OX=9606 GN=TES PE=1 SV=10	unknown	CYTOSOL	0.896864	CYTOSOL
Q13185	0.0654408	0.101848	0.0642921	0.0880478	0.108462	0.0868991	0.0736472	0.0449587	0.0661166	0.300288	0.0869151	0.0736973	0.0943874	0.0837336	0.125721	0.118657	0.110211	0.0791707	0.0599877	0.16752	0.0981585	0.0713988	0.0723806	0.0713096	0.0943952	0.118507	0.0646606	0.0893527	0.0610311	0.258806	Q13185	Chromobox protein homolog 3 OS=Homo sapiens OX=9606 GN=CBX3 PE=1 SV=40	unknown	CYTOSOL	0.916514	CYTOSOL
Q15750	0.0347523	0.0737374	0.0714526	0.070178	0.0932179	0.0786195	0.113011	0.169865	0.160871	0.134295	0.0374716	0.0587813	0.0742078	0.0687258	0.106331	0.108287	0.117796	0.182394	0.122994	0.123011	0.039304	0.0514396	0.0790581	0.0648868	0.105385	0.122159	0.0868484	0.160641	0.121748	0.168529	Q15750	TGF-beta-activated kinase 1 and MAP3K7-binding protein 1 OS=Homo sapiens OX=9606 GN=TAB1 PE=1 SV=10	unknown	NUCLEUS	0.76874	unknown
P45974	0.0330722	0.0899587	0.0828419	0.11046	0.118797	0.106022	0.0769452	0.0408468	0.0542432	0.286813	0.0399011	0.0727345	0.0977552	0.0876657	0.139442	0.130208	0.107464	0.0562543	0.0485856	0.21999	0.0411526	0.0626908	0.0839502	0.0883833	0.109218	0.153702	0.066392	0.0808484	0.063576	0.250087	P45974	Ubiquitin carboxyl-terminal hydrolase 5 OS=Homo sapiens OX=9606 GN=USP5 PE=1 SV=20	unknown	CYTOSOL	0.925543	CYTOSOL
O43617	0.0375859	0.0737653	0.0525942	0.0858734	0.103448	0.0822627	0.108901	0.188089	0.168513	0.0989675	0.0398912	0.0523701	0.0636437	0.0657309	0.0896156	0.0924083	0.143044	0.215801	0.12373	0.113765	0.0506004	0.0552933	0.06359	0.0696814	0.0970323	0.115791	0.0987131	0.16662	0.117337	0.165342	O43617	Trafficking protein particle complex subunit 3 OS=Homo sapiens OX=9606 GN=TRAPPC3 PE=1 SV=10	unknown	NUCLEUS	0.902974	NUCLEUS
Q9BSJ2	0.0328261	0.0792156	0.0458352	0.093039	0.102436	0.0795188	0.0955507	0.280347	0.17843	0.0128013	0.0360409	0.0515579	0.053832	0.0580552	0.0853821	0.0828022	0.150431	0.313504	0.149858	0.0185364	0.0411417	0.0467139	0.0526312	0.0657211	0.109374	0.139158	0.172892	0.238679	0.117647	0.0160412	Q9BSJ2	Gamma-tubulin complex component 2 OS=Homo sapiens OX=9606 GN=TUBGCP2 PE=1 SV=20	unknown	RIBOSOME	0.539128	unknown
Q71RC2	0.037423	0.157657	0.0643755	0.111417	0.106007	0.0994439	0.114573	0.167426	0.123341	0.0183358	0.088268	0.113706	0.07402	0.0702669	0.100188	0.0919169	0.15016	0.162219	0.113219	0.036037	0.0397256	0.0556402	0.0565854	0.0746951	0.102835	0.120549	0.158872	0.239451	0.126006	0.0256402	Q71RC2	La-related protein 4 OS=Homo sapiens OX=9606 GN=LARP4 PE=1 SV=30	unknown	RIBOSOME	0.815108	RIBOSOME
Q86SQ0	0.0413801	0.102782	0.0470137	0.076762	0.0797882	0.064225	0.0747626	0.260899	0.229097	0.0232907	0.0663	0.0665491	0.0613081	0.0626233	0.081206	0.0706742	0.115562	0.267103	0.179311	0.0293637	0.0690886	0.0677361	0.0505673	0.0641577	0.0983733	0.11681	0.110874	0.214	0.164053	0.0443403	Q86SQ0	Pleckstrin homology-like domain family B member 2 OS=Homo sapiens OX=9606 GN=PHLDB2 PE=1 SV=20	unknown	NUCLEUS	0.96034	NUCLEUS
P31751	0.0473105	0.120128	0.0815592	0.102438	0.124756	0.0759025	0.0754911	0.0614008	0.108403	0.202612	0.0381361	0.0804607	0.106639	0.0869319	0.128356	0.15577	0.105005	0.0690681	0.062199	0.167435	0.0460366	0.0602272	0.0795095	0.0784851	0.10548	0.130156	0.0621554	0.083607	0.0711036	0.283239	P31751	RAC-beta serine/threonine-protein kinase OS=Homo sapiens OX=9606 GN=AKT2 PE=1 SV=20	unknown	CYTOSOL	0.8332	unknown
Q9UH17	0.148244	0.0780234	0.0421001	0.069896	0.0887516	0.102081	0.131339	0.20725	0.128576	0.00373862	0.146996	0.0579399	0.0391631	0.0544528	0.102736	0.0831545	0.185891	0.20735	0.0979077	0.0244099	0.136542	0.0918468	0.0604126	0.0520629	0.0805501	0.0918468	0.107073	0.232809	0.103635	0.043222	Q9UH17	DNA dC->dU-editing enzyme APOBEC-3B OS=Homo sapiens OX=9606 GN=APOBEC3B PE=1 SV=10	unknown	NUCLEUS	0.948117	NUCLEUS
Q9ULK4	0.156839	0.0945825	0.0538761	0.0736306	0.0894942	0.0676444	0.0733313	0.189165	0.14786	0.0535768	0.128444	0.0918773	0.08286	0.0753337	0.0881142	0.0785998	0.082434	0.118574	0.0812979	0.172465	0.187682	0.0942941	0.0456878	0.0460904	0.0820167	0.100735	0.127101	0.148033	0.10003	0.0683305	Q9ULK4	Mediator of RNA polymerase II transcription subunit 23 OS=Homo sapiens OX=9606 GN=MED23 PE=1 SV=20	unknown	NUCLEUS	0.623057	unknown
Q92538	0.0321047	0.0938445	0.0575623	0.0901632	0.0918942	0.075461	0.06324	0.172237	0.220128	0.103365	0.0418286	0.0710456	0.0728794	0.0668418	0.0782877	0.0823672	0.105391	0.202095	0.176965	0.102299	0.0452387	0.0696742	0.0793802	0.0769141	0.0890277	0.110056	0.0575773	0.0869866	0.107673	0.277472	Q92538	Golgi-specific brefeldin A-resistance guanine nucleotide exchange factor 1 OS=Homo sapiens OX=9606 GN=GBF1 PE=1 SV=20	unknown	NUCLEUS	0.610515	unknown
P04632	0.0417425	0.0843949	0.0997498	0.0788217	0.108451	0.107513	0.106915	0.0481972	0.058576	0.265639	0.0415834	0.069405	0.0916868	0.0822201	0.122191	0.119614	0.0942989	0.0506118	0.0461064	0.282283	0.040743	0.0574113	0.0717056	0.0755007	0.0959642	0.126124	0.0508744	0.0699335	0.0556224	0.356121	P04632	Calpain small subunit 1 OS=Homo sapiens OX=9606 GN=CAPNS1 PE=1 SV=10	unknown	CYTOSOL	0.895783	CYTOSOL
Q6SJ93	0.0482386	0.0834663	0.0421319	0.0716857	0.0789318	0.0717313	0.0733491	0.272	0.239598	0.0188671	0.0602895	0.0571421	0.054227	0.0551299	0.0794572	0.0720274	0.108273	0.272167	0.201713	0.0395738	0.0785621	0.0556805	0.040099	0.0548012	0.0802184	0.098949	0.112833	0.227527	0.187244	0.0640847	Q6SJ93	Protein FAM111B OS=Homo sapiens OX=9606 GN=FAM111B PE=1 SV=10	unknown	NUCLEUS	0.962405	NUCLEUS
Q96FV9	0.137005	0.100343	0.0401482	0.0579071	0.0803508	0.086452	0.10383	0.228033	0.124585	0.0413466	0.164784	0.0635733	0.0396636	0.0485031	0.077453	0.0786941	0.145357	0.22238	0.1062	0.0533914	0.14762	0.0743883	0.0404725	0.0439436	0.0588888	0.0824153	0.0983006	0.244956	0.133735	0.0752802	Q96FV9	THO complex subunit 1 OS=Homo sapiens OX=9606 GN=THOC1 PE=1 SV=10	NUCLEUS	NUCLEUS	1	NUCLEUS
P63104	0.03537	0.0828215	0.068534	0.079145	0.104151	0.0832335	0.0732754	0.0406184	0.0580562	0.374795	0.0399989	0.0641318	0.0883208	0.0730104	0.116068	0.101066	0.0928668	0.0609945	0.0447806	0.318762	0.0448494	0.0607795	0.0723767	0.076073	0.0909104	0.11448	0.0577247	0.0766384	0.0526173	0.35355	P63104	14-3-3 protein zeta/delta OS=Homo sapiens OX=9606 GN=YWHAZ PE=1 SV=10	unknown	CYTOSOL	0.9249	CYTOSOL
A0A087X2I1	0.02311	0.0819874	0.0481007	0.0712248	0.0748804	0.0706613	0.0392962	0.120283	0.322153	0.148303	0.0274747	0.0481309	0.0573776	0.0500994	0.079303	0.0726852	0.0683274	0.140637	0.233065	0.222899	0.0226975	0.0303469	0.0432737	0.0435308	0.0570811	0.0764682	0.0365885	0.133562	0.304709	0.251742	A0A087X2I1	26S proteasome regulatory subunit 10B OS=Homo sapiens OX=9606 GN=PSMC6 PE=1 SV=10	unknown	PROTEASOME	0.880763	PROTEASOME
P58546	0.0213556	0.0745161	0.067664	0.0785131	0.109376	0.0686633	0.0925598	0.0360018	0.0586993	0.392651	0.0528	0.0849675	0.128452	0.123642	0.181731	0.142838	0.120987	0.0409602	0.0396979	0.0839228	0.0396832	0.068016	0.0821391	0.0936801	0.137921	0.183531	0.0723656	0.0945986	0.065538	0.162528	P58546	Myotrophin OS=Homo sapiens OX=9606 GN=MTPN PE=1 SV=20	unknown	CYTOSOL	0.827234	unknown
Q53T59	0.0392699	0.176991	0.0951327	0.116704	0.13219	0.0978982	0.0674779	0.0237832	0.0591814	0.191372	0.0468708	0.0841862	0.117924	0.0986324	0.130332	0.14505	0.100127	0.0552486	0.0558826	0.165746	0.0311842	0.07185	0.0783818	0.0992415	0.109987	0.126633	0.0516224	0.0811209	0.066161	0.283818	Q53T59	HCLS1-binding protein 3 OS=Homo sapiens OX=9606 GN=HS1BP3 PE=1 SV=10	unknown	CYTOSOL	0.803293	unknown
P83436	0.0512947	0.143921	0.100783	0.0981004	0.0974435	0.0792139	0.0792139	0.104122	0.109213	0.136695	0.0568457	0.0950384	0.0912487	0.0727302	0.0917325	0.0958448	0.111837	0.121996	0.0825405	0.180186	0.0481299	0.101021	0.100103	0.0826641	0.0816888	0.102627	0.0634465	0.099587	0.0847292	0.236003	P83436	Conserved oligomeric Golgi complex subunit 7 OS=Homo sapiens OX=9606 GN=COG7 PE=1 SV=10	unknown	CYTOSOL	0.575983	unknown
Q05639	0.0345223	0.105692	0.0578013	0.107383	0.110854	0.093336	0.0929297	0.201086	0.169174	0.0272222	0.0492105	0.0607505	0.0663365	0.0785613	0.0962477	0.0886128	0.142991	0.219854	0.155657	0.0417794	0.0440121	0.0481882	0.0523559	0.0729582	0.102033	0.124875	0.136536	0.186603	0.139513	0.092926	Q05639	Elongation factor 1-alpha 2 OS=Homo sapiens OX=9606 GN=EEF1A2 PE=1 SV=10	unknown	RIBOSOME	0.550274	unknown
Q12979	0.051358	0.122378	0.0809368	0.130005	0.122615	0.0941814	0.0619666	0.076486	0.0917183	0.168356	0.0537386	0.0736167	0.0902482	0.0889933	0.108115	0.106581	0.0934749	0.0872207	0.0724814	0.225531	0.0568397	0.0669926	0.0740664	0.0761053	0.0877562	0.106335	0.05969	0.0891085	0.0761885	0.306918	Q12979	Active breakpoint cluster region-related protein OS=Homo sapiens OX=9606 GN=ABR PE=2 SV=20	unknown	CYTOSOL	0.85	unknown
A0A1W2PNX8	0.0547171	0.111887	0.0831393	0.102947	0.116631	0.105179	0.0716113	0.0732787	0.0896172	0.190992	0.0487348	0.0707872	0.0840087	0.07942	0.10961	0.10427	0.0936731	0.0925177	0.0725203	0.244458	0.0536819	0.0635911	0.0696844	0.0706136	0.0893428	0.111347	0.0663711	0.0872483	0.0795174	0.308602	A0A1W2PNX8	Protein unc-45 homolog A OS=Homo sapiens OX=9606 GN=UNC45A PE=1 SV=10	unknown	CYTOSOL	0.89851	CYTOSOL
Q9H5N1	0.0324141	0.0837799	0.0745001	0.0682264	0.111619	0.069272	0.0840413	0.0671808	0.0776369	0.331329	0.0377596	0.0636519	0.0817226	0.081273	0.123798	0.0967365	0.089724	0.100512	0.0790254	0.245797	0.0415292	0.0572168	0.067523	0.0704676	0.0893537	0.135046	0.0605168	0.0907752	0.0731076	0.314464	Q9H5N1	Rab GTPase-binding effector protein 2 OS=Homo sapiens OX=9606 GN=RABEP2 PE=1 SV=20	unknown	CYTOSOL	0.91937	CYTOSOL
Q8N5A5	0.0329802	0.099217	0.0502994	0.0872409	0.0830032	0.0771994	0.0730539	0.234454	0.223676	0.0388761	0.038856	0.0534183	0.0542934	0.057934	0.0949347	0.0758218	0.130955	0.264186	0.185424	0.0441768	0.0394809	0.0431756	0.0490687	0.0487023	0.0804275	0.106718	0.0969466	0.226229	0.200183	0.109069	Q8N5A5	Zinc finger CCCH-type with G patch domain-containing protein OS=Homo sapiens OX=9606 GN=ZGPAT PE=1 SV=30	unknown	NUCLEUS	0.964211	NUCLEUS
A0A0D9SGE8	0.0458401	0.0888528	0.0415088	0.0816339	0.0967936	0.0771822	0.0808518	0.237623	0.224388	0.0253264	0.0476069	0.049736	0.0579118	0.0602112	0.0798842	0.084994	0.151593	0.229092	0.1682	0.0707716	0.0661737	0.0537252	0.0391239	0.0575627	0.099401	0.114845	0.134407	0.212748	0.15687	0.0651441	A0A0D9SGE8	PHD finger protein 6 OS=Homo sapiens OX=9606 GN=PHF6 PE=1 SV=10	unknown	NUCLEUS	0.924706	NUCLEUS
A8MXP9	0.219582	0.159556	0.0291173	0.0770215	0.102007	0.103433	0.113882	0.127284	0.0600539	0.00806326	0.256736	0.0685057	0.0338827	0.0542449	0.0982396	0.103405	0.195503	0.129316	0.0527155	0.00745176	0.224996	0.112417	0.0343388	0.0447492	0.0696735	0.0862214	0.101865	0.24997	0.0667637	0.00900494	A8MXP9	Matrin-3 OS=Homo sapiens OX=9606 GN=MATR3 PE=1 SV=10	unknown	NUCLEUS	0.856818	unknown
Q9Y6D5	0.0368564	0.0802119	0.0592294	0.0970338	0.116921	0.10189	0.112887	0.198765	0.163942	0.0322638	0.0468087	0.0608679	0.06599	0.075838	0.109114	0.105926	0.158419	0.202873	0.131939	0.0422249	0.0393837	0.0464336	0.0502139	0.0678879	0.10496	0.1317	0.134844	0.196824	0.155658	0.0720937	Q9Y6D5	Brefeldin A-inhibited guanine nucleotide-exchange protein 2 OS=Homo sapiens OX=9606 GN=ARFGEF2 PE=1 SV=30	unknown	RIBOSOME	0.815239	RIBOSOME
Q9P0T7	0.0441465	0.159254	0.115108	0.207652	0.172008	0.123937	0.0925441	0.0434925	0.0235448	0.0183126	0.0490172	0.108226	0.134676	0.183936	0.158457	0.114778	0.171075	0.0512012	0.00994904	0.0186848	0.0727554	0.100619	0.121981	0.134985	0.194118	0.186378	0.0956656	0.0517028	0.022291	0.0195046	Q9P0T7	Transmembrane protein 9 OS=Homo sapiens OX=9606 GN=TMEM9 PE=1 SV=10	unknown	ER	0.313526	unknown
P26641	0.0742386	0.11115	0.062208	0.0838468	0.0824485	0.0762019	0.0843765	0.204816	0.167408	0.053306	0.121101	0.119488	0.0975785	0.0947697	0.0969236	0.0724972	0.10184	0.13886	0.0965177	0.0604234	0.109945	0.0867202	0.0599369	0.0628647	0.0839456	0.0945545	0.101317	0.180449	0.136373	0.0838946	P26641	Elongation factor 1-gamma OS=Homo sapiens OX=9606 GN=EEF1G PE=1 SV=30	unknown	NUCLEUS	0.917091	NUCLEUS
Q9UJX6	0.0671593	0.0771571	0.0393393	0.0571615	0.0625951	0.0686807	0.0673767	0.18822	0.267985	0.104325	0.0756131	0.0810627	0.0825954	0.0665872	0.0868529	0.0797003	0.0946866	0.143563	0.138454	0.150886	0.0714401	0.0596412	0.0510748	0.0543074	0.0961694	0.101988	0.0491353	0.147567	0.204784	0.163892	Q9UJX6	Anaphase-promoting complex subunit 2 OS=Homo sapiens OX=9606 GN=ANAPC2 PE=1 SV=10	unknown	NUCLEUS	0.630164	unknown
Q4G0F5	0.03796	0.13368	0.108591	0.212429	0.200747	0.127373	0.0762312	0.0416372	0.0328968	0.0284559	0.0453268	0.0885988	0.13592	0.16922	0.191219	0.144441	0.121053	0.0475629	0.0321518	0.0245067	0.0412304	0.0803315	0.12612	0.17189	0.206346	0.171045	0.0884615	0.0506273	0.0306544	0.033294	Q4G0F5	Vacuolar protein sorting-associated protein 26B OS=Homo sapiens OX=9606 GN=VPS26B PE=1 SV=20	unknown	ER	0.639602	unknown
Q16777	0.480006	0.314427	0.0242361	0.0426538	0.0284777	0.0241245	0.0145807	0.0296219	0.0348542	0.00701828	0.644762	0.144247	0.0378512	0.0493122	0.0355434	0.0172893	0.0249038	0.024604	0.0157116	0.00577613	0.556169	0.234236	0.0372035	0.0247538	0.0366432	0.0250339	0.0194198	0.0195094	0.0163045	0.0307265	Q16777	Histone H2A type 2-C OS=Homo sapiens OX=9606 GN=HIST2H2AC PE=1 SV=40	unknown	NUCLEUS-CHROMATIN	0.832161	NUCLEUS-CHROMATIN
Q9BQ67	0.0406399	0.0621552	0.0524458	0.0629092	0.0787974	0.0623023	0.0833027	0.264858	0.206124	0.0864656	0.048498	0.0561384	0.0659618	0.0670044	0.089828	0.0800371	0.116431	0.228643	0.140574	0.106885	0.053299	0.0498878	0.052613	0.0581747	0.0770657	0.0980516	0.0818858	0.16366	0.128288	0.237074	Q9BQ67	Glutamate-rich WD repeat-containing protein 1 OS=Homo sapiens OX=9606 GN=GRWD1 PE=1 SV=10	unknown	NUCLEUS	0.883009	NUCLEUS
B8ZZC8	0.0492642	0.103268	0.0485158	0.0936643	0.11125	0.0864305	0.0757047	0.156024	0.187453	0.088426	0.0538217	0.0592357	0.0624204	0.0601911	0.105096	0.0847134	0.11051	0.201592	0.132803	0.129618	0.0630564	0.0541543	0.0497033	0.0541543	0.0771513	0.0949555	0.078635	0.155786	0.126113	0.246291	B8ZZC8	Methyltransferase-like protein 5 OS=Homo sapiens OX=9606 GN=METTL5 PE=1 SV=10	unknown	NUCLEUS	0.81112	unknown
Q08AM6	0.0278574	0.0603927	0.0435585	0.0710274	0.0721443	0.0584179	0.0725975	0.291037	0.283397	0.0195698	0.0312881	0.0469185	0.050497	0.0528141	0.0631384	0.0710084	0.120422	0.313306	0.219209	0.0313978	0.0339598	0.0360499	0.0388367	0.0505734	0.0580407	0.0705277	0.070885	0.287506	0.304102	0.0495195	Q08AM6	Protein VAC14 homolog OS=Homo sapiens OX=9606 GN=VAC14 PE=1 SV=10	unknown	NUCLEUS	0.865873	NUCLEUS
O14879	0.0415142	0.0895018	0.079651	0.0669856	0.11047	0.0968196	0.0819026	0.094568	0.103715	0.234872	0.0417102	0.0673188	0.0827059	0.0673188	0.105897	0.105347	0.1076	0.0951805	0.0688575	0.258065	0.0363821	0.0498394	0.0685714	0.0614032	0.0746238	0.108876	0.058563	0.0896365	0.0875402	0.364565	O14879	Interferon-induced protein with tetratricopeptide repeats 3 OS=Homo sapiens OX=9606 GN=IFIT3 PE=1 SV=10	unknown	CYTOSOL	0.906733	CYTOSOL
B0QYK0	0.0212569	0.0815876	0.0466965	0.0572163	0.0614351	0.0730413	0.0910029	0.330334	0.229789	0.00764091	0.0339714	0.0399271	0.0468551	0.0512914	0.075828	0.0561683	0.112261	0.352112	0.213947	0.017639	0.0350982	0.0439046	0.0485529	0.0565058	0.096216	0.119094	0.143589	0.285561	0.155845	0.0156335	B0QYK0	RNA-binding protein EWS OS=Homo sapiens OX=9606 GN=EWSR1 PE=1 SV=10	unknown	NUCLEUS	0.821686	unknown
C9JRD2	0.0540231	0.174202	0.111938	0.155774	0.14925	0.0971729	0.0667277	0.0421197	0.0612338	0.0875587	0.0593233	0.0943125	0.117351	0.12743	0.138085	0.117783	0.0938805	0.0632109	0.0456443	0.142981	0.0786681	0.0914746	0.118185	0.0973289	0.11416	0.106842	0.0596414	0.0812294	0.0622027	0.190267	C9JRD2	DnaJ homolog subfamily B member 2 (Fragment) OS=Homo sapiens OX=9606 GN=DNAJB2 PE=1 SV=10	unknown	CYTOSOL	0.326585	unknown
B4DKV7	0.0605593	0.156288	0.09041	0.141477	0.134957	0.0881226	0.0645622	0.0582719	0.0671928	0.13816	0.0711913	0.0917848	0.110275	0.105182	0.136736	0.116143	0.0954384	0.0854739	0.0656554	0.122121	0.10366	0.124421	0.106409	0.1114	0.128183	0.109447	0.05693	0.0534578	0.0483941	0.157697	B4DKV7	Epidermal growth factor receptor kinase substrate 8-like protein 1 OS=Homo sapiens OX=9606 GN=EPS8L1 PE=1 SV=10	unknown	CYTOSOL	0.419749	unknown
Q9UNN8	0.151308	0.179663	0.110649	0.167604	0.169559	0.0902795	0.0719465	0.0316956	0.0105924	0.0167033	0.134411	0.175866	0.145266	0.133141	0.126328	0.104619	0.0995381	0.0429561	0.00577367	0.0321016	0.226339	0.2033	0.117787	0.119759	0.106061	0.0794936	0.0516812	0.0295766	0.0142175	0.051785	Q9UNN8	Endothelial protein C receptor OS=Homo sapiens OX=9606 GN=PROCR PE=1 SV=10	unknown	PM	0.815733	PM
F5GZS6	0.191321	0.214948	0.111282	0.148296	0.131111	0.0942592	0.075826	0.0223908	0.0076162	0.00294975	0.179859	0.193224	0.13844	0.145584	0.137563	0.0854622	0.0884048	0.0212527	0.00520808	0.00500213	0.249415	0.2302	0.139434	0.108578	0.102199	0.0775054	0.0504635	0.0263926	0.00812634	0.00768651	F5GZS6	4F2 cell-surface antigen heavy chain OS=Homo sapiens OX=9606 GN=SLC3A2 PE=1 SV=10	unknown	PM	0.774793	PM
P30154	0.0513699	0.0929285	0.0766383	0.0745094	0.105702	0.0883932	0.0764532	0.0740466	0.0907997	0.26916	0.0451476	0.0693866	0.0816912	0.0781756	0.10704	0.106485	0.0931631	0.0916829	0.0637432	0.263484	0.0495228	0.0622131	0.0691256	0.0770699	0.0999226	0.113696	0.0687129	0.109569	0.0945576	0.25561	P30154	Serine/threonine-protein phosphatase 2A 65 kDa regulatory subunit A beta isoform OS=Homo sapiens OX=9606 GN=PPP2R1B PE=1 SV=30	unknown	CYTOSOL	0.923847	CYTOSOL
Q92805	0.10082	0.300066	0.170866	0.14416	0.0862861	0.0537402	0.039042	0.0395669	0.0394029	0.0260499	0.101148	0.204381	0.159609	0.120968	0.112899	0.09376	0.0681484	0.0585042	0.0412382	0.0393434	0.0868864	0.192519	0.207457	0.143742	0.118273	0.0830446	0.0398758	0.0487257	0.0357768	0.0437005	Q92805	Golgin subfamily A member 1 OS=Homo sapiens OX=9606 GN=GOLGA1 PE=1 SV=30	unknown	GOLGI	0.512248	GOLGI
Q9BYG5	0.110054	0.228189	0.072678	0.129034	0.114839	0.080387	0.0577915	0.0787921	0.0724653	0.0557712	0.150295	0.135971	0.0954095	0.0973392	0.100939	0.0897317	0.107396	0.0989721	0.0856867	0.0382603	0.245718	0.205675	0.113243	0.090305	0.0775641	0.0705467	0.0399553	0.050284	0.0368194	0.0698888	Q9BYG5	Partitioning defective 6 homolog beta OS=Homo sapiens OX=9606 GN=PARD6B PE=1 SV=10	unknown	NUCLEUS-CHROMATIN	0.28879	unknown
A0A0A0MTL6	0.046601	0.11734	0.0888177	0.112759	0.117734	0.0894089	0.0781773	0.08133	0.107635	0.160197	0.0513072	0.0774503	0.097229	0.103887	0.113777	0.119945	0.110937	0.0879272	0.083521	0.154019	0.096736	0.101387	0.0900449	0.0832313	0.0986536	0.110363	0.0607099	0.0842105	0.0705426	0.204121	A0A0A0MTL6	Rho family-interacting cell polarization regulator 1 OS=Homo sapiens OX=9606 GN=RIPOR1 PE=1 SV=10	unknown	CYTOSOL	0.710248	unknown
H0Y4E8	0.0213689	0.0882069	0.0602506	0.0870823	0.105559	0.0861183	0.0616967	0.153438	0.20662	0.129659	0.0371253	0.05495	0.0701635	0.0694823	0.109787	0.0921889	0.10445	0.173819	0.142371	0.145663	0.0410387	0.050313	0.0783677	0.0623696	0.0760492	0.0853234	0.0630652	0.105263	0.112914	0.325296	H0Y4E8	Serine/threonine-protein kinase SIK3 (Fragment) OS=Homo sapiens OX=9606 GN=SIK3 PE=1 SV=10	unknown	NUCLEUS	0.394797	unknown
Q5T280	0.0856742	0.11236	0.0400281	0.0976124	0.0758427	0.0814607	0.0695225	0.24368	0.179775	0.0140449	0.120758	0.0497122	0.0504068	0.0773963	0.0842429	0.067176	0.125521	0.257293	0.151816	0.0156777	0.107413	0.0447213	0.031652	0.0512559	0.0773943	0.106187	0.149275	0.250153	0.166224	0.0157239	Q5T280	Putative methyltransferase C9orf114 OS=Homo sapiens OX=9606 GN=SPOUT1 PE=1 SV=30	unknown	NUCLEUS	0.947966	NUCLEUS
O75381	0.0410315	0.215853	0.189605	0.281135	0.158686	0.0679862	0.0217605	0.00774527	0.00826776	0.00792968	0.0581428	0.163835	0.222012	0.24507	0.176963	0.0792952	0.0413957	0.00529683	0.00395077	0.00403818	0.0552021	0.134133	0.192596	0.209532	0.205638	0.119371	0.0421374	0.0126118	0.00828711	0.0204913	O75381	Peroxisomal membrane protein PEX14 OS=Homo sapiens OX=9606 GN=PEX14 PE=1 SV=10	PEROXISOME	PEROXISOME	1	PEROXISOME
O15264	0.0590406	0.131138	0.0598921	0.0993471	0.108714	0.0874255	0.0621629	0.168322	0.163497	0.0604598	0.0539655	0.06773	0.0616124	0.0624135	0.0913262	0.0777074	0.108368	0.194378	0.150098	0.132401	0.0582671	0.0575816	0.0569646	0.064368	0.0937072	0.114135	0.105155	0.193378	0.138744	0.117699	O15264	Mitogen-activated protein kinase 13 OS=Homo sapiens OX=9606 GN=MAPK13 PE=1 SV=10	unknown	NUCLEUS	0.920965	NUCLEUS
P46977	0.059001	0.189586	0.182468	0.248776	0.174315	0.100497	0.037117	0.00224645	0.00395022	0.00204453	0.0603864	0.136822	0.186779	0.221541	0.193023	0.116284	0.0800787	0.00318854	0.000765963	0.00113113	0.0726868	0.12565	0.16169	0.196889	0.204762	0.146204	0.0668842	0.0135908	0.00543527	0.00620718	P46977	Dolichyl-diphosphooligosaccharide--protein glycosyltransferase subunit STT3A OS=Homo sapiens OX=9606 GN=STT3A PE=1 SV=20	unknown	ER	0.911815	ER
P10644	0.0336428	0.163072	0.0991536	0.176511	0.140987	0.0878838	0.0501911	0.0366005	0.0477794	0.164179	0.0424289	0.085281	0.114225	0.113605	0.139347	0.114705	0.0879188	0.0497214	0.0431342	0.209634	0.0462457	0.0774766	0.0891535	0.102355	0.132454	0.143553	0.0589044	0.0633973	0.0553239	0.231136	P10644	cAMP-dependent protein kinase type I-alpha regulatory subunit OS=Homo sapiens OX=9606 GN=PRKAR1A PE=1 SV=10	unknown	CYTOSOL	0.668862	unknown
O15498	0.0684409	0.169869	0.120641	0.131555	0.113296	0.0862707	0.074814	0.0434344	0.0808881	0.110791	0.0646798	0.120647	0.12516	0.115678	0.122669	0.139285	0.112091	0.0535933	0.0450502	0.101148	0.0596442	0.0859244	0.12192	0.100182	0.111466	0.125327	0.0525604	0.0693235	0.0655023	0.208151	O15498	Synaptobrevin homolog YKT6 OS=Homo sapiens OX=9606 GN=YKT6 PE=1 SV=10	unknown	CYTOSOL	0.407334	unknown
H3BMD8	0.0457598	0.150891	0.0507746	0.114534	0.113907	0.0704755	0.0765649	0.105937	0.114803	0.156354	0.049069	0.0572149	0.0576028	0.0527541	0.0577967	0.0465477	0.0449961	0.269201	0.143522	0.221296	0.0496938	0.0522845	0.0766604	0.0409797	0.0615874	0.0664154	0.0832548	0.156736	0.117051	0.295337	H3BMD8	cAMP-regulated phosphoprotein 19 OS=Homo sapiens OX=9606 GN=ARPP19 PE=1 SV=10	unknown	NUCLEUS	0.350144	unknown
Q8WVK2	0.0453562	0.0912839	0.0431108	0.0869973	0.0950806	0.0810369	0.0969177	0.233803	0.203388	0.0230251	0.045788	0.0359524	0.0492332	0.0472327	0.072794	0.0801845	0.126528	0.289564	0.217548	0.0351745	0.0514631	0.0382062	0.045395	0.0437881	0.0742558	0.0910436	0.0985707	0.25406	0.233466	0.0697522	Q8WVK2	U4/U6.U5 small nuclear ribonucleoprotein 27 kDa protein OS=Homo sapiens OX=9606 GN=SNRNP27 PE=1 SV=10	unknown	NUCLEUS	0.956523	NUCLEUS
Q9UBS4	0.0414359	0.241596	0.138664	0.265569	0.164527	0.0885654	0.0291495	0.010452	0.0104793	0.00956212	0.0526866	0.118654	0.169687	0.226137	0.220862	0.113875	0.0722373	0.00942535	0.00596567	0.0104704	0.0627488	0.121145	0.14429	0.188595	0.208025	0.162374	0.0683087	0.0219958	0.00718489	0.0153332	Q9UBS4	DnaJ homolog subfamily B member 11 OS=Homo sapiens OX=9606 GN=DNAJB11 PE=1 SV=10	unknown	ER	0.941972	ER
P61026	0.0913182	0.189471	0.131363	0.185962	0.156535	0.111089	0.0683742	0.0292597	0.0111821	0.0254458	0.105256	0.137308	0.138816	0.166483	0.152522	0.113271	0.116919	0.0288856	0.00927777	0.0312621	0.130804	0.148479	0.121408	0.125	0.168321	0.131361	0.0666447	0.0394001	0.0187541	0.0498282	P61026	Ras-related protein Rab-10 OS=Homo sapiens OX=9606 GN=RAB10 PE=1 SV=10	unknown	PM	0.636003	PM
Q8TED0	0.154904	0.139979	0.0432921	0.0743986	0.0773951	0.071345	0.0816758	0.198396	0.135013	0.0236009	0.208743	0.0767204	0.0515792	0.0594436	0.0672663	0.0752562	0.126668	0.207404	0.10433	0.0225894	0.180986	0.0874565	0.0379383	0.0402867	0.0596405	0.0748644	0.0938538	0.261438	0.135962	0.0275731	Q8TED0	U3 small nucleolar RNA-associated protein 15 homolog OS=Homo sapiens OX=9606 GN=UTP15 PE=1 SV=30	NUCLEUS	NUCLEUS	1	NUCLEUS
Q7L5N7	0.0404447	0.158358	0.153832	0.255559	0.206583	0.114138	0.0499979	0.00921947	0.00876059	0.00310792	0.0568312	0.113247	0.167922	0.207351	0.203766	0.137052	0.0897403	0.0120519	0.00462338	0.00741558	0.0532161	0.0956231	0.124534	0.161506	0.212357	0.169727	0.0874017	0.0518789	0.0263852	0.0173714	Q7L5N7	Lysophosphatidylcholine acyltransferase 2 OS=Homo sapiens OX=9606 GN=LPCAT2 PE=1 SV=10	unknown	ER	0.916846	ER
Q07889	0.0429075	0.121673	0.0653944	0.111948	0.101009	0.0991856	0.078765	0.178437	0.155585	0.0450954	0.0496512	0.0665572	0.0753659	0.0753932	0.0952537	0.0998222	0.120722	0.204815	0.149884	0.0625359	0.0546922	0.070009	0.0646294	0.0706814	0.106396	0.123655	0.0975792	0.167364	0.13942	0.105574	Q07889	Son of sevenless homolog 1 OS=Homo sapiens OX=9606 GN=SOS1 PE=1 SV=10	unknown	NUCLEUS	0.884257	NUCLEUS
O43815	0.0399097	0.140513	0.0892821	0.169816	0.143672	0.0926556	0.0611224	0.0918694	0.0990737	0.0720861	0.0441253	0.0754947	0.101029	0.0990275	0.134197	0.112824	0.10778	0.128927	0.0889856	0.107611	0.0582091	0.0727968	0.0898099	0.0999894	0.118702	0.128669	0.0761251	0.106239	0.102255	0.147205	O43815	Striatin OS=Homo sapiens OX=9606 GN=STRN PE=1 SV=40	unknown	CYTOSOL	0.297205	unknown
A8MQ02	0.104972	0.158812	0.0628834	0.106318	0.0906764	0.068319	0.0602237	0.154956	0.144318	0.0485214	0.130247	0.105587	0.0799847	0.0810388	0.0913723	0.0745065	0.0895675	0.167332	0.123922	0.0564429	0.268882	0.188392	0.0877997	0.0631912	0.0663421	0.0626713	0.0479251	0.0840659	0.0722343	0.0584964	A8MQ02	Afadin OS=Homo sapiens OX=9606 GN=AFDN PE=1 SV=20	unknown	NUCLEUS-CHROMATIN	0.602644	NUCLEUS-CHROMATIN
G3V3R7	0.0473554	0.100685	0.0743115	0.0792656	0.114964	0.0833455	0.0766429	0.045024	0.0950022	0.283404	0.0452017	0.0644414	0.100603	0.0807449	0.141091	0.125483	0.0933395	0.0530057	0.0529285	0.243162	0.0378378	0.0507235	0.0754573	0.0722905	0.0942397	0.121267	0.0506143	0.0738193	0.0666121	0.357139	G3V3R7	Ataxin-3 (Fragment) OS=Homo sapiens OX=9606 GN=ATXN3 PE=1 SV=10	unknown	CYTOSOL	0.916438	CYTOSOL
E9PNP3	0.0314813	0.0782061	0.0780957	0.0815199	0.0986413	0.0881476	0.0857174	0.0499282	0.0750028	0.33326	0.0427769	0.0705093	0.0817473	0.064981	0.124705	0.111111	0.0862788	0.0840131	0.0789378	0.254939	0.0375	0.0508065	0.072379	0.0627016	0.0975806	0.125202	0.06875	0.117641	0.0814516	0.285988	E9PNP3	Mth938 domain-containing protein OS=Homo sapiens OX=9606 GN=AAMDC PE=1 SV=10	unknown	CYTOSOL	0.931258	CYTOSOL
Q9BVS4	0.028623	0.067442	0.0382879	0.0561043	0.0609102	0.0494663	0.0427487	0.199644	0.388137	0.0686368	0.030406	0.0472506	0.0477645	0.0476789	0.0690915	0.0657797	0.0729173	0.198481	0.333324	0.0873066	0.0221846	0.0280562	0.0337805	0.0311763	0.0421089	0.0624263	0.0341244	0.199858	0.44374	0.102545	Q9BVS4	Serine/threonine-protein kinase RIO2 OS=Homo sapiens OX=9606 GN=RIOK2 PE=1 SV=20	unknown	PROTEASOME	0.30864	unknown
F5GYQ1	0.0583236	0.181464	0.148956	0.193975	0.161844	0.102846	0.093135	0.0342753	0.00911492	0.0160653	0.0593992	0.138353	0.165069	0.167852	0.163732	0.117411	0.13374	0.0294322	0.00631764	0.0186939	0.0685883	0.13961	0.150059	0.16542	0.161468	0.138293	0.0854228	0.0441403	0.0134408	0.0335573	F5GYQ1	V-type proton ATPase subunit OS=Homo sapiens OX=9606 GN=ATP6V0D1 PE=1 SV=10	unknown	ER	0.317241	unknown
Q9UHL4	0.0499716	0.302076	0.245876	0.208532	0.0899886	0.0426337	0.0208476	0.0151308	0.0136803	0.0112628	0.0624802	0.274814	0.264694	0.189274	0.0925919	0.0436515	0.028243	0.0187229	0.0114241	0.0141039	0.0935852	0.264345	0.285045	0.174498	0.0903188	0.0422275	0.0207399	0.0117277	0.00531287	0.0121999	Q9UHL4	Dipeptidyl peptidase 2 OS=Homo sapiens OX=9606 GN=DPP7 PE=1 SV=30	LYSOSOME	LYSOSOME	1	LYSOSOME
Q9Y496	0.0354796	0.109987	0.0448095	0.0948752	0.100263	0.0919842	0.0843627	0.185808	0.156636	0.095795	0.0423669	0.056993	0.0644172	0.0710412	0.0957144	0.0930026	0.12021	0.196008	0.144216	0.116031	0.0406624	0.044995	0.055297	0.0585064	0.0765108	0.0947078	0.0804904	0.151353	0.140569	0.256908	Q9Y496	Kinesin-like protein KIF3A OS=Homo sapiens OX=9606 GN=KIF3A PE=1 SV=40	unknown	NUCLEUS	0.819551	unknown
A0A075B7G8	0.0369926	0.122281	0.0858024	0.111663	0.0936804	0.0993321	0.0691899	0.042473	0.0727864	0.265799	0.0423497	0.0686096	0.0874317	0.0801457	0.113236	0.106102	0.0796903	0.075592	0.0602611	0.286582	0.0478182	0.0562791	0.0685426	0.0800456	0.0974427	0.127959	0.0467725	0.0764331	0.0712045	0.327503	A0A075B7G8	Amyloid-beta A4 precursor protein-binding family B member 1 OS=Homo sapiens OX=9606 GN=APBB1 PE=1 SV=70	unknown	CYTOSOL	0.928266	CYTOSOL
J3KN67	0.0263613	0.087844	0.104093	0.0831936	0.110636	0.0967663	0.092873	0.0385011	0.0605094	0.299221	0.0411873	0.0695616	0.10747	0.0983339	0.141815	0.115184	0.0948464	0.0479918	0.0374154	0.246195	0.0374335	0.0615861	0.07075	0.0746077	0.0966256	0.115396	0.0442493	0.0540994	0.0480307	0.397222	J3KN67	Tropomyosin alpha-3 chain OS=Homo sapiens OX=9606 GN=TPM3 PE=1 SV=10	unknown	CYTOSOL	0.878898	CYTOSOL
A0A0D9SF70	0.0599175	0.166532	0.107544	0.120684	0.141384	0.096143	0.110981	0.0853077	0.07613	0.0353764	0.0694809	0.0880188	0.11229	0.093672	0.153087	0.140105	0.133148	0.107749	0.0648746	0.0375751	0.0653077	0.0779539	0.121109	0.0996946	0.134991	0.154518	0.0845774	0.11011	0.0832904	0.0684478	A0A0D9SF70	ADP-ribosylation factor GTPase-activating protein 2 OS=Homo sapiens OX=9606 GN=ARFGAP2 PE=1 SV=10	unknown	NUCLEUS	0.251933	unknown
Q9H1E3	0.0237517	0.109649	0.0549595	0.0913968	0.0990553	0.0911943	0.0589744	0.0310729	0.0494265	0.39052	0.0524715	0.0611516	0.0782048	0.061012	0.110888	0.0917413	0.09029	0.0520528	0.0459125	0.356276	0.0389891	0.0449874	0.049337	0.0480918	0.0849235	0.0919742	0.042795	0.0584397	0.0432861	0.497176	Q9H1E3	Nuclear ubiquitous casein and cyclin-dependent kinase substrate 1 OS=Homo sapiens OX=9606 GN=NUCKS1 PE=1 SV=10	unknown	CYTOSOL	0.805775	unknown
E9PEE8	0.0939932	0.164518	0.117279	0.192181	0.170233	0.106578	0.0758147	0.0399441	0.0176313	0.0218264	0.104414	0.145017	0.142168	0.162033	0.149651	0.127697	0.122873	0.0283728	0.00945761	0.00831814	0.157529	0.149255	0.128627	0.14032	0.146167	0.118367	0.0756757	0.0494208	0.0148924	0.0197463	E9PEE8	Integrin beta OS=Homo sapiens OX=9606 GN=ITGB6 PE=1 SV=10	unknown	PM	0.766872	PM
A0A0G2JNY3	0.0857972	0.144461	0.0800898	0.11148	0.109001	0.0969779	0.0636228	0.138567	0.109702	0.0603013	0.0727823	0.0918559	0.0856797	0.0880412	0.101605	0.0923403	0.102997	0.166879	0.116137	0.0816833	0.138887	0.134496	0.102817	0.088953	0.0867574	0.0865065	0.0602848	0.0883257	0.0762186	0.136754	A0A0G2JNY3	Rho GTPase-activating protein 27 OS=Homo sapiens OX=9606 GN=ARHGAP27 PE=1 SV=10	unknown	NUCLEUS	0.449267	unknown
Q6XZF7	0.0492232	0.10887	0.0517597	0.083188	0.0856848	0.0675729	0.0699509	0.24243	0.19931	0.0420101	0.064734	0.0759665	0.0680347	0.05954	0.077297	0.0736893	0.110611	0.251977	0.163217	0.0549344	0.0645368	0.061178	0.0586989	0.0563797	0.0793714	0.0898077	0.0817706	0.211364	0.16702	0.129873	Q6XZF7	Dynamin-binding protein OS=Homo sapiens OX=9606 GN=DNMBP PE=1 SV=10	unknown	NUCLEUS	0.965816	NUCLEUS
Q12996	0.19	0.123196	0.0344168	0.0847977	0.0998048	0.0978906	0.117989	0.165346	0.0790934	0.00746526	0.222826	0.0773797	0.0452311	0.0644072	0.0892215	0.106183	0.193991	0.13073	0.0582665	0.0117632	0.173809	0.0970559	0.0459082	0.0634668	0.0872006	0.0997224	0.113055	0.205417	0.0856256	0.0287394	Q12996	Cleavage stimulation factor subunit 3 OS=Homo sapiens OX=9606 GN=CSTF3 PE=1 SV=10	NUCLEUS	NUCLEUS	1	NUCLEUS
Q9BVC4	0.039886	0.0835708	0.0536562	0.0636277	0.0864198	0.0636277	0.0887939	0.274454	0.207028	0.0389364	0.0531763	0.0710207	0.0628123	0.0424697	0.0794076	0.0842256	0.100999	0.30853	0.160956	0.0364026	0.0550448	0.0698143	0.0545703	0.0462661	0.07106	0.0990569	0.0949641	0.262352	0.193962	0.0529094	Q9BVC4	Target of rapamycin complex subunit LST8 OS=Homo sapiens OX=9606 GN=MLST8 PE=1 SV=10	unknown	NUCLEUS	0.955084	NUCLEUS
Q9NYB9	0.0601773	0.13655	0.0560518	0.0954995	0.106444	0.0759632	0.0763723	0.191374	0.165701	0.0358677	0.0701096	0.0733533	0.0673324	0.0762577	0.0908436	0.081049	0.123535	0.244186	0.154741	0.0185927	0.0885247	0.0795904	0.0729201	0.0718229	0.0925652	0.107996	0.119647	0.206482	0.128755	0.0316968	Q9NYB9	Abl interactor 2 OS=Homo sapiens OX=9606 GN=ABI2 PE=1 SV=10	unknown	NUCLEUS	0.918904	NUCLEUS
F5H365	0.0478306	0.161967	0.100288	0.145571	0.125553	0.0936662	0.126324	0.139451	0.0524913	0.00685689	0.048633	0.108379	0.0996755	0.104126	0.122775	0.108576	0.201367	0.156102	0.0436664	0.00669994	0.0604958	0.106283	0.11338	0.116366	0.119272	0.120438	0.116089	0.1684	0.0656162	0.013661	F5H365	Protein transport protein Sec23A OS=Homo sapiens OX=9606 GN=SEC23A PE=1 SV=10	unknown	NUCLEUS	0.382313	unknown
Q9H9Q4	0.0694395	0.115379	0.0542275	0.10896	0.111336	0.0802042	0.075959	0.159347	0.162228	0.0629201	0.0711148	0.0662644	0.06699	0.0732536	0.0752397	0.0862392	0.117519	0.212848	0.142459	0.0880724	0.0785227	0.067246	0.0656942	0.0641424	0.0812125	0.101904	0.0906269	0.174736	0.160666	0.115249	Q9H9Q4	Non-homologous end-joining factor 1 OS=Homo sapiens OX=9606 GN=NHEJ1 PE=1 SV=10	unknown	NUCLEUS	0.954404	NUCLEUS
O15530	0.0390995	0.118039	0.0531694	0.0996742	0.105746	0.10545	0.0835308	0.14766	0.149141	0.0984893	0.0627716	0.0611486	0.0722475	0.0806764	0.123135	0.120046	0.142767	0.136485	0.0985812	0.102141	0.0410827	0.0498823	0.0559068	0.0696069	0.0893491	0.122036	0.0891383	0.152967	0.12042	0.209611	O15530	3-phosphoinositide-dependent protein kinase 1 OS=Homo sapiens OX=9606 GN=PDPK1 PE=1 SV=10	unknown	NUCLEUS	0.691073	unknown
Q9NZC9	0.0429553	0.113975	0.0395189	0.0936426	0.0947881	0.0756014	0.0715922	0.22795	0.199599	0.040378	0.0550685	0.0613733	0.0625554	0.0696483	0.0851148	0.0839326	0.100384	0.273668	0.17348	0.0347749	0.057634	0.0596562	0.0687563	0.0703741	0.11183	0.106977	0.112841	0.202629	0.165015	0.0442872	Q9NZC9	SWI/SNF-related matrix-associated actin-dependent regulator of chromatin subfamily A-like protein 1 OS=Homo sapiens OX=9606 GN=SMARCAL1 PE=1 SV=10	unknown	NUCLEUS	0.941242	NUCLEUS
Q8ND24	0.0340947	0.127785	0.0827144	0.137773	0.153743	0.134452	0.119445	0.12449	0.0645137	0.0209891	0.0398242	0.067948	0.0748826	0.0980124	0.160267	0.134997	0.178588	0.152391	0.0683618	0.0247278	0.0339254	0.0499006	0.0644877	0.0862683	0.152197	0.17622	0.176821	0.171989	0.0622589	0.0259312	Q8ND24	RING finger protein 214 OS=Homo sapiens OX=9606 GN=RNF214 PE=1 SV=20	unknown	RIBOSOME	0.337907	unknown
P48739	0.0445385	0.131743	0.085254	0.110426	0.121423	0.105407	0.0655727	0.0454667	0.0565423	0.233626	0.0456726	0.0916001	0.115185	0.0858791	0.130851	0.124635	0.093385	0.0793613	0.0597281	0.173702	0.0517863	0.0658849	0.0889251	0.0853563	0.0905134	0.121907	0.0653751	0.0831797	0.0636299	0.283442	P48739	Phosphatidylinositol transfer protein beta isoform OS=Homo sapiens OX=9606 GN=PITPNB PE=1 SV=20	unknown	CYTOSOL	0.893461	CYTOSOL
Q00341	0.0341136	0.172844	0.0952248	0.175366	0.136835	0.0972797	0.0835015	0.108907	0.0854328	0.0104946	0.0426769	0.0819009	0.1002	0.129932	0.142566	0.0996946	0.150427	0.137899	0.0965777	0.0181261	0.035716	0.0674787	0.0804045	0.107494	0.137831	0.148046	0.154256	0.164202	0.0859929	0.0185793	Q00341	Vigilin OS=Homo sapiens OX=9606 GN=HDLBP PE=1 SV=20	unknown	RIBOSOME	0.432312	unknown
P40306	0.0284108	0.0887461	0.0441723	0.0726835	0.0814175	0.0506977	0.0492922	0.107218	0.284108	0.193254	0.0260894	0.0474604	0.0552318	0.0488482	0.0888149	0.0829864	0.0757702	0.124341	0.220927	0.229531	0.0262589	0.0361134	0.0456075	0.0469895	0.0609903	0.0888114	0.0454873	0.133458	0.265653	0.250631	P40306	Proteasome subunit beta type-10 OS=Homo sapiens OX=9606 GN=PSMB10 PE=1 SV=10	PROTEASOME	PROTEASOME	1	PROTEASOME
Q96D71	0.121167	0.131141	0.065386	0.0990026	0.10085	0.0727743	0.0613225	0.0657554	0.118212	0.164389	0.118028	0.11645	0.0683235	0.0695858	0.103748	0.0850493	0.0798422	0.0882051	0.0758185	0.194951	0.144576	0.129427	0.0834079	0.0591269	0.0744548	0.0915733	0.0501737	0.0905347	0.0791104	0.197615	Q96D71	RalBP1-associated Eps domain-containing protein 1 OS=Homo sapiens OX=9606 GN=REPS1 PE=1 SV=30	unknown	NUCLEUS-CHROMATIN	0.451563	unknown
A6NNK5	0.148331	0.125397	0.0608103	0.071374	0.0952348	0.0897676	0.0742002	0.0549031	0.0615285	0.218454	0.168168	0.0708134	0.0672893	0.0670029	0.113544	0.0938305	0.0879276	0.0572014	0.0506156	0.223607	0.15488	0.0912489	0.0489848	0.0601994	0.0840585	0.109184	0.0490869	0.062426	0.048086	0.291845	A6NNK5	TP53-binding protein 1 OS=Homo sapiens OX=9606 GN=TP53BP1 PE=1 SV=20	unknown	CYTOSOL	0.643712	unknown
Q9ULM6	0.0381164	0.108593	0.0686186	0.148704	0.162618	0.142676	0.157088	0.115528	0.0493564	0.00870196	0.036169	0.0627273	0.0793857	0.103319	0.143787	0.140088	0.223772	0.143291	0.0478051	0.0196553	0.0335436	0.0477805	0.0567117	0.0868361	0.143253	0.186258	0.221276	0.163709	0.0387314	0.0219006	Q9ULM6	CCR4-NOT transcription complex subunit 6 OS=Homo sapiens OX=9606 GN=CNOT6 PE=1 SV=20	unknown	NUCLEUS	0.319879	unknown
A0A1W2PRA1	0.0501681	0.212654	0.130247	0.26808	0.193604	0.089475	0.0393932	0.00930954	0.00474097	0.00232739	0.0644628	0.114601	0.177135	0.178604	0.189256	0.148301	0.0841139	0.0191001	0.0116621	0.012764	0.0596269	0.106938	0.140105	0.157542	0.198269	0.156079	0.0860871	0.0431655	0.0282892	0.0238995	A0A1W2PRA1	Stromal interaction molecule 2 OS=Homo sapiens OX=9606 GN=STIM2 PE=1 SV=10	unknown	ER	0.914356	ER
A0A087WYV9	0.223814	0.4829	0.119069	0.0724382	0.0487128	0.019056	0.0116103	0.00933872	0.00460626	0.00845533	0.235185	0.435311	0.139958	0.0678669	0.0486004	0.0284654	0.017253	0.0125943	0.00576414	0.00900154	0.246109	0.364028	0.144799	0.0682783	0.0608353	0.0439811	0.0234361	0.0145168	0.0140862	0.0199299	A0A087WYV9	SYNJ2BP-COX16 readthrough OS=Homo sapiens OX=9606 GN=SYNJ2BP-COX16 PE=4 SV=10	unknown	MITOCHONDRIA	0.752866	unknown
P09497-2	0.0751337	0.1168	0.0703836	0.113893	0.165547	0.103128	0.153049	0.0849408	0.0371153	0.0800101	0.109182	0.0960469	0.0843373	0.098453	0.137414	0.130463	0.186016	0.0909852	0.0184466	0.0486562	0.132184	0.11764	0.0966064	0.0754974	0.114862	0.10504	0.113625	0.0995102	0.0364357	0.1086	P09497-2	Isoform Non-brain of Clathrin light chain B OS=Homo sapiens OX=9606 GN=CLTB0	unknown	NUCLEUS	0.371426	unknown
Q5T0F9	0.0740321	0.155535	0.0747113	0.10369	0.0930496	0.0950872	0.0695042	0.112973	0.144895	0.0765225	0.119093	0.0812854	0.0982987	0.119093	0.155009	0.128544	0.0850662	0.0529301	0.073724	0.0869565	0.0603285	0.0842645	0.0780973	0.0894547	0.103132	0.127618	0.0619161	0.111254	0.111437	0.172498	Q5T0F9	Coiled-coil and C2 domain-containing protein 1B OS=Homo sapiens OX=9606 GN=CC2D1B PE=1 SV=10	unknown	CYTOSOL	0.283376	unknown
Q9NYZ3	0.0496084	0.100878	0.0398766	0.0932827	0.102777	0.0650368	0.0973178	0.227391	0.176359	0.0474721	0.0779102	0.0927284	0.067293	0.077681	0.0995264	0.0889093	0.116025	0.192408	0.16216	0.025359	0.0477263	0.0472643	0.0504981	0.0683701	0.102064	0.116414	0.128656	0.241605	0.157095	0.040306	Q9NYZ3	G2 and S phase-expressed protein 1 OS=Homo sapiens OX=9606 GN=GTSE1 PE=1 SV=30	unknown	NUCLEUS	0.838292	unknown
Q9BZD3	0.0309191	0.11457	0.0605676	0.105887	0.0961457	0.0800508	0.0739094	0.106734	0.154807	0.176408	0.0462489	0.0605472	0.0868491	0.0660194	0.11421	0.103972	0.0962048	0.121271	0.0988526	0.205825	0.0392873	0.0575605	0.0631948	0.057256	0.0922796	0.106594	0.0612152	0.113141	0.117405	0.292066	Q9BZD3	Putative GRINL1B complex locus protein 2 OS=Homo sapiens OX=9606 GN=GCOM2 PE=5 SV=20	unknown	CYTOSOL	0.729784	unknown
E9PD50	0.0265111	0.113892	0.0443266	0.108165	0.114104	0.0878049	0.106893	0.203606	0.169247	0.0254507	0.0353071	0.0609122	0.0736147	0.0813163	0.09992	0.107922	0.146029	0.220944	0.119624	0.0544109	0.0419784	0.0453034	0.0469659	0.0706567	0.0985037	0.111388	0.13217	0.237323	0.157107	0.0586035	E9PD50	Protein SMG7 OS=Homo sapiens OX=9606 GN=SMG7 PE=1 SV=10	unknown	RIBOSOME	0.639724	unknown
Q9NVI1	0.0667861	0.114041	0.0602758	0.0995574	0.106214	0.0860247	0.0633115	0.141399	0.132475	0.129915	0.0821002	0.0909706	0.0758552	0.066428	0.0759149	0.0865752	0.102247	0.156802	0.109487	0.15362	0.0798218	0.0608248	0.0604449	0.0622755	0.0844156	0.111011	0.0812379	0.127521	0.113222	0.219225	Q9NVI1	Fanconi anemia group I protein OS=Homo sapiens OX=9606 GN=FANCI PE=1 SV=40	NUCLEUS	NUCLEUS	1	NUCLEUS
Q92733	0.0848008	0.134689	0.0552018	0.0844934	0.0957797	0.0864696	0.0967459	0.140574	0.147424	0.073822	0.0931405	0.0569584	0.0632715	0.0608687	0.0932347	0.0977575	0.114105	0.208518	0.142985	0.0691605	0.0798258	0.0591246	0.0559163	0.0452219	0.0966313	0.115881	0.105569	0.204339	0.139256	0.0982354	Q92733	Proline-rich protein PRCC OS=Homo sapiens OX=9606 GN=PRCC PE=1 SV=10	NUCLEUS	NUCLEUS	1	NUCLEUS
E9PMH5	0.0442723	0.110404	0.0758163	0.101273	0.116491	0.0965689	0.094632	0.126176	0.120642	0.113724	0.0440791	0.0720038	0.0716226	0.0746724	0.116178	0.106838	0.10803	0.162068	0.114177	0.130331	0.0465483	0.0542406	0.0591716	0.0666667	0.082643	0.12998	0.0960552	0.15641	0.114793	0.193491	E9PMH5	Baculoviral IAP repeat-containing protein 2 OS=Homo sapiens OX=9606 GN=BIRC2 PE=1 SV=10	unknown	NUCLEUS	0.603217	unknown
P13473	0.0472481	0.242871	0.216189	0.239717	0.114129	0.0606695	0.0397811	0.0187319	0.012842	0.00782105	0.0514993	0.251087	0.288047	0.178467	0.0959749	0.0514502	0.0527518	0.0185172	0.00584494	0.00636067	0.0776854	0.227238	0.236701	0.18758	0.120045	0.0678868	0.0372283	0.0182545	0.00874361	0.0186381	P13473	Lysosome-associated membrane glycoprotein 2 OS=Homo sapiens OX=9606 GN=LAMP2 PE=1 SV=20	unknown	LYSOSOME	0.624012	unknown
P39023	0.0286107	0.0971838	0.0646805	0.10169	0.112317	0.0950198	0.113495	0.223867	0.154587	0.00854886	0.0400864	0.0633532	0.0742079	0.0890683	0.114907	0.09578	0.150643	0.226428	0.132079	0.013447	0.0316953	0.0464708	0.0545596	0.0808143	0.116946	0.137274	0.143595	0.230539	0.144391	0.013715	P39023	60S ribosomal protein L3 OS=Homo sapiens OX=9606 GN=RPL3 PE=1 SV=20	RIBOSOME	RIBOSOME	1	RIBOSOME
Q8TAE6	0.0198113	0.10283	0.084434	0.13066	0.120755	0.0806604	0.0613208	0.0570755	0.0801887	0.262264	0.028314	0.0626341	0.0737881	0.0600601	0.121407	0.104676	0.118404	0.0763621	0.0943801	0.259974	0.0330951	0.0526514	0.0737119	0.0639338	0.0936442	0.117337	0.0470102	0.0868748	0.0691989	0.362542	Q8TAE6	Protein phosphatase 1 regulatory subunit 14C OS=Homo sapiens OX=9606 GN=PPP1R14C PE=1 SV=30	unknown	CYTOSOL	0.90089	CYTOSOL
Q86VY4	0.0422877	0.124103	0.0587391	0.0956167	0.0906481	0.0968312	0.0948438	0.204483	0.176438	0.0160097	0.043935	0.0589839	0.0610039	0.0748409	0.107868	0.105545	0.149884	0.206343	0.165034	0.026563	0.0455504	0.0497673	0.0528937	0.0648539	0.102734	0.130471	0.131089	0.226552	0.149411	0.0466773	Q86VY4	Testis-specific Y-encoded-like protein 5 OS=Homo sapiens OX=9606 GN=TSPYL5 PE=1 SV=20	unknown	RIBOSOME	0.615415	unknown
P52943	0.16909	0.277405	0.0768084	0.136279	0.0796048	0.0514541	0.0425056	0.0689784	0.0743848	0.0234899	0.213551	0.164952	0.107853	0.0939038	0.0803611	0.0479483	0.0627923	0.131522	0.0880882	0.00902843	0.267136	0.207119	0.124272	0.0881979	0.0820002	0.0532366	0.0526009	0.0678038	0.0426952	0.014938	P52943	Cysteine-rich protein 2 OS=Homo sapiens OX=9606 GN=CRIP2 PE=1 SV=10	unknown	NUCLEUS-CHROMATIN	0.488234	unknown
O00429-4	0.0577827	0.0975404	0.071603	0.0892362	0.102574	0.0949934	0.0846847	0.12497	0.13558	0.141036	0.0588978	0.069177	0.0808351	0.0755508	0.100468	0.121595	0.109908	0.131488	0.101557	0.150523	0.0585314	0.0647643	0.0650889	0.0683596	0.0915466	0.125812	0.0749335	0.128879	0.105595	0.21649	O00429-4	Isoform 3 of Dynamin-1-like protein OS=Homo sapiens OX=9606 GN=DNM1L0	unknown	CYTOSOL	0.509439	unknown
X6RLX0	0.047045	0.114098	0.0566735	0.0943692	0.0946292	0.0868782	0.0779911	0.240838	0.168538	0.0189393	0.0755949	0.0837525	0.0693484	0.0735603	0.0927371	0.0861769	0.126907	0.220434	0.148109	0.0233792	0.0485339	0.0512232	0.0519765	0.0671759	0.102369	0.128551	0.120427	0.225717	0.154662	0.0493646	X6RLX0	ELKS/Rab6-interacting/CAST family member 1 OS=Homo sapiens OX=9606 GN=ERC1 PE=1 SV=10	unknown	NUCLEUS	0.86756	NUCLEUS
Q15642	0.0278266	0.0847843	0.047099	0.0932375	0.103814	0.0916298	0.0908411	0.257053	0.180944	0.0227709	0.031398	0.0440288	0.0503652	0.0552912	0.0877524	0.0828895	0.140391	0.301644	0.184978	0.0212618	0.0366431	0.0415783	0.0469688	0.0580491	0.0884153	0.118793	0.108444	0.246523	0.177597	0.0769876	Q15642	Cdc42-interacting protein 4 OS=Homo sapiens OX=9606 GN=TRIP10 PE=1 SV=30	unknown	NUCLEUS	0.913629	NUCLEUS
Q9HB66	0.210667	0.615937	0.0808254	0.0299048	0.0161905	0.0111111	0.00990476	0.00736508	0.00768254	0.0104127	0.266407	0.500207	0.116693	0.0227592	0.0246627	0.0157246	0.0187867	0.0128279	0.0135728	0.00835885	0.305539	0.412729	0.111855	0.0354109	0.0314631	0.0257208	0.0175858	0.0216533	0.0142362	0.0238067	Q9HB66	Alternative protein MKKS OS=Homo sapiens OX=9606 GN=MKKS PE=1 SV=10	unknown	MITOCHONDRIA	0.951971	MITOCHONDRIA
Q96S66	0.0406718	0.156414	0.166168	0.240146	0.192473	0.101781	0.0577094	0.0147713	0.00991501	0.0199514	0.0553068	0.11195	0.162742	0.209129	0.201889	0.129049	0.0877541	0.020819	0.0103463	0.0110144	0.0643616	0.113634	0.151358	0.171511	0.216677	0.157038	0.0801184	0.024482	0.00928983	0.011531	Q96S66	Chloride channel CLIC-like protein 1 OS=Homo sapiens OX=9606 GN=CLCC1 PE=1 SV=10	ER	ER	1	ER
P51532	0.324046	0.236676	0.0303854	0.057276	0.0540724	0.042326	0.0408698	0.090865	0.0961072	0.027376	0.355477	0.102011	0.0378082	0.0553302	0.062865	0.0504258	0.0754826	0.126087	0.0988898	0.0356235	0.378549	0.164606	0.0422713	0.0367192	0.0548265	0.0575394	0.046877	0.0904101	0.0830284	0.0451735	P51532	Transcription activator BRG1 OS=Homo sapiens OX=9606 GN=SMARCA4 PE=1 SV=20	unknown	NUCLEUS-CHROMATIN	0.880964	NUCLEUS-CHROMATIN
Q92621	0.212275	0.160945	0.0626861	0.0922702	0.10397	0.0781818	0.046176	0.0382891	0.0649769	0.14023	0.232812	0.105649	0.0842988	0.0814805	0.0888255	0.101521	0.0699469	0.0440442	0.0381734	0.153248	0.224216	0.123341	0.0629617	0.0718441	0.0810292	0.0957575	0.0392943	0.0523672	0.0593672	0.189822	Q92621	Nuclear pore complex protein Nup205 OS=Homo sapiens OX=9606 GN=NUP205 PE=1 SV=30	unknown	NUCLEUS-CHROMATIN	0.643785	NUCLEUS-CHROMATIN
Q2TAA2	0.0448751	0.122217	0.072922	0.0894102	0.103179	0.0710522	0.063573	0.0470848	0.0623831	0.323304	0.0552462	0.101553	0.0830891	0.073857	0.0993552	0.091442	0.0895369	0.0753224	0.0559789	0.274619	0.0511475	0.0721311	0.0793443	0.0793443	0.129836	0.130492	0.0642623	0.0662295	0.0485246	0.278689	Q2TAA2	Isoamyl acetate-hydrolyzing esterase 1 homolog OS=Homo sapiens OX=9606 GN=IAH1 PE=1 SV=10	unknown	CYTOSOL	0.906641	CYTOSOL
P53365	0.0489567	0.130016	0.0869449	0.109506	0.117264	0.0922062	0.0973783	0.0809702	0.0772249	0.159533	0.0470656	0.09092	0.0967672	0.077572	0.102662	0.123775	0.128759	0.109876	0.0625225	0.160081	0.0532593	0.0720989	0.0929799	0.0836676	0.0982808	0.115723	0.0606017	0.0867837	0.0747851	0.261819	P53365	Arfaptin-2 OS=Homo sapiens OX=9606 GN=ARFIP2 PE=1 SV=10	unknown	CYTOSOL	0.767549	unknown
P28838	0.0937109	0.218394	0.0714345	0.0839432	0.0885488	0.0689857	0.0475303	0.0327118	0.0500209	0.24472	0.0895445	0.145321	0.0919029	0.0613027	0.097335	0.0875777	0.0727969	0.046888	0.0411835	0.266147	0.0857589	0.114378	0.0736941	0.0578476	0.0696074	0.0996657	0.0432698	0.0634591	0.0546881	0.337631	P28838	Cytosol aminopeptidase OS=Homo sapiens OX=9606 GN=LAP3 PE=1 SV=30	unknown	CYTOSOL	0.729394	unknown
E7ESC6	0.0283725	0.0810539	0.0718634	0.074223	0.107795	0.094745	0.0699554	0.0472778	0.0709458	0.353768	0.0406589	0.0666478	0.0886173	0.0715783	0.0961396	0.108896	0.0965952	0.052241	0.0485355	0.33009	0.0356185	0.0505419	0.0609533	0.0689811	0.0831893	0.111768	0.0532575	0.071884	0.0645969	0.39921	E7ESC6	Exportin-7 OS=Homo sapiens OX=9606 GN=XPO7 PE=1 SV=10	unknown	CYTOSOL	0.918818	CYTOSOL
P38606	0.0409476	0.155718	0.143818	0.153367	0.11376	0.0937619	0.0809021	0.0706483	0.0585439	0.0885331	0.0460256	0.119366	0.140958	0.116248	0.109942	0.0979129	0.0886959	0.0789066	0.0562392	0.145705	0.0472477	0.100212	0.114821	0.104701	0.106169	0.109678	0.0592814	0.0935482	0.0794466	0.184895	P38606	V-type proton ATPase catalytic subunit A OS=Homo sapiens OX=9606 GN=ATP6V1A PE=1 SV=20	unknown	CYTOSOL	0.302507	unknown
Q7Z7L7	0.0511649	0.0881681	0.100503	0.109182	0.101873	0.0954774	0.0835998	0.0758337	0.0950206	0.199178	0.0401697	0.062547	0.0856771	0.0732225	0.106549	0.118456	0.101074	0.0782865	0.065079	0.268939	0.0398799	0.0584849	0.0607375	0.0721675	0.086017	0.124896	0.0635742	0.0826798	0.0806775	0.330886	Q7Z7L7	Protein zer-1 homolog OS=Homo sapiens OX=9606 GN=ZER1 PE=1 SV=10	unknown	CYTOSOL	0.899562	CYTOSOL
Q71UI9	0.401341	0.305036	0.0212233	0.0537591	0.0469516	0.0260286	0.026329	0.0391431	0.0373411	0.0428471	0.521227	0.130502	0.0470858	0.0373953	0.0454529	0.0333665	0.0401285	0.0532621	0.0373953	0.054185	0.525001	0.202648	0.0461273	0.0326713	0.0339093	0.0314872	0.0244362	0.0209914	0.0158243	0.0669035	Q71UI9	Histone H2A.V OS=Homo sapiens OX=9606 GN=H2AFV PE=1 SV=30	unknown	NUCLEUS-CHROMATIN	0.829769	NUCLEUS-CHROMATIN
Q12929	0.137201	0.243978	0.0864192	0.147358	0.113293	0.0695668	0.058961	0.0703308	0.0535233	0.019369	0.157319	0.158836	0.121898	0.126353	0.119231	0.0827078	0.0944776	0.0792584	0.0431186	0.0168003	0.204598	0.190715	0.125194	0.116329	0.118075	0.082616	0.0563757	0.0553256	0.0316617	0.0191094	Q12929	Epidermal growth factor receptor kinase substrate 8 OS=Homo sapiens OX=9606 GN=EPS8 PE=1 SV=10	unknown	PM	0.538777	unknown
Q8IV38	0.046288	0.114267	0.082737	0.128354	0.129696	0.10085	0.0644007	0.0648479	0.0550089	0.213551	0.0413132	0.079663	0.0849506	0.0869262	0.13097	0.0994189	0.0811156	0.0586287	0.0492156	0.287798	0.0472625	0.0559784	0.0732875	0.0676406	0.0942794	0.0934201	0.0617481	0.0693592	0.0502087	0.386816	Q8IV38	Ankyrin repeat and MYND domain-containing protein 2 OS=Homo sapiens OX=9606 GN=ANKMY2 PE=1 SV=10	unknown	CYTOSOL	0.887318	CYTOSOL
Q14914	0.0331548	0.111235	0.0611343	0.100615	0.109492	0.0817999	0.0551862	0.0341072	0.0508015	0.362475	0.0369473	0.0578437	0.0781597	0.0564304	0.0943368	0.0874218	0.0707147	0.0782607	0.0572633	0.382622	0.0351207	0.0531791	0.0662572	0.0674746	0.0824157	0.117297	0.0524044	0.0716618	0.0553557	0.398834	Q14914	Prostaglandin reductase 1 OS=Homo sapiens OX=9606 GN=PTGR1 PE=1 SV=20	unknown	CYTOSOL	0.884707	CYTOSOL
Q16718	0.296899	0.56199	0.0892444	0.0142527	0.00656001	0.0074567	0.00769267	0.0049554	0.00481382	0.00613526	0.287696	0.467689	0.101502	0.0310642	0.0236497	0.0189198	0.0180888	0.0161713	0.0125919	0.022627	0.351842	0.419375	0.106118	0.0257566	0.0215789	0.0205921	0.0115132	0.0198684	0.00891447	0.0144408	Q16718	NADH dehydrogenase [ubiquinone] 1 alpha subcomplex subunit 5 OS=Homo sapiens OX=9606 GN=NDUFA5 PE=1 SV=30	unknown	MITOCHONDRIA	0.952303	MITOCHONDRIA
P35658	0.0620766	0.119906	0.0625374	0.0834133	0.0968159	0.0812136	0.0848196	0.197262	0.172875	0.0390817	0.0865139	0.0632781	0.06881	0.0652356	0.105955	0.101732	0.120933	0.196144	0.13822	0.0531788	0.0868434	0.0624597	0.063245	0.0626953	0.0923461	0.106313	0.080976	0.16663	0.15397	0.124521	P35658	Nuclear pore complex protein Nup214 OS=Homo sapiens OX=9606 GN=NUP214 PE=1 SV=20	unknown	NUCLEUS	0.957925	NUCLEUS
P18583	0.135248	0.10536	0.0344469	0.0600832	0.0769701	0.0735132	0.107593	0.22574	0.162843	0.0182024	0.184679	0.0608392	0.0432018	0.0548039	0.0851604	0.0796296	0.129443	0.202137	0.133028	0.0270777	0.153359	0.072562	0.0327812	0.0476515	0.0806544	0.0993412	0.109841	0.225731	0.149194	0.0288854	P18583	Protein SON OS=Homo sapiens OX=9606 GN=SON PE=1 SV=40	unknown	NUCLEUS	0.977569	NUCLEUS
P35251	0.191884	0.16506	0.0436449	0.0702674	0.06938	0.052277	0.0582873	0.163285	0.159977	0.0259368	0.293164	0.102103	0.0396582	0.0622261	0.0747152	0.0446976	0.0677038	0.161481	0.111963	0.0422875	0.340599	0.156314	0.0348508	0.0381944	0.0658436	0.068287	0.0580633	0.109439	0.089249	0.039159	P35251	Replication factor C subunit 1 OS=Homo sapiens OX=9606 GN=RFC1 PE=1 SV=40	unknown	NUCLEUS-CHROMATIN	0.875518	NUCLEUS-CHROMATIN
Q9HAU0	0.131905	0.197836	0.0609166	0.088582	0.0763107	0.0566502	0.0584536	0.165157	0.148795	0.0153941	0.142887	0.136589	0.0837933	0.0813871	0.0891012	0.0608634	0.0863411	0.175301	0.118117	0.0256192	0.117653	0.111613	0.0672616	0.0641598	0.0885938	0.0841315	0.0831519	0.200697	0.150468	0.0322704	Q9HAU0	Pleckstrin homology domain-containing family A member 5 OS=Homo sapiens OX=9606 GN=PLEKHA5 PE=1 SV=10	unknown	NUCLEUS	0.775117	unknown
M0R205	0.084991	0.138638	0.0672092	0.0913201	0.125075	0.0819771	0.062387	0.0473177	0.0819771	0.219108	0.10698	0.0954245	0.0873171	0.0829373	0.102414	0.0970087	0.0840555	0.0805144	0.0681204	0.195229	0.0807356	0.0695271	0.0656743	0.0779335	0.0915937	0.108932	0.0669002	0.0816112	0.0609457	0.296147	M0R205	Interferon regulatory factor 3 (Fragment) OS=Homo sapiens OX=9606 GN=IRF3 PE=1 SV=10	unknown	CYTOSOL	0.833407	unknown
P18754	0.498763	0.310201	0.0165151	0.0260517	0.0351155	0.0260239	0.0164317	0.0293881	0.0223538	0.0191564	0.671163	0.13021	0.0220891	0.0287576	0.0329253	0.0214311	0.0287576	0.0277924	0.0199833	0.0168904	0.590291	0.178412	0.0285268	0.0243585	0.0291346	0.0283097	0.0186705	0.0305241	0.0237506	0.0480222	P18754	Regulator of chromosome condensation OS=Homo sapiens OX=9606 GN=RCC1 PE=1 SV=10	NUCLEUS-CHROMATIN	NUCLEUS-CHROMATIN	1	NUCLEUS-CHROMATIN
P49441	0.0451316	0.0768909	0.0681153	0.112411	0.115754	0.0848308	0.0735478	0.0413707	0.0760552	0.305892	0.0484568	0.0728395	0.104321	0.0740741	0.1	0.104012	0.087037	0.0527778	0.05	0.306481	0.054712	0.0627862	0.0600145	0.0679682	0.0899012	0.119667	0.0583273	0.0718245	0.0494095	0.365389	P49441	Inositol polyphosphate 1-phosphatase OS=Homo sapiens OX=9606 GN=INPP1 PE=1 SV=10	unknown	CYTOSOL	0.930667	CYTOSOL
Q96KB5	0.0296997	0.128401	0.0857809	0.110586	0.118116	0.113386	0.0647651	0.0372305	0.053516	0.258519	0.0412477	0.0740698	0.0982709	0.0858363	0.12917	0.134646	0.100194	0.0465605	0.0444256	0.245579	0.039882	0.0611695	0.073801	0.0834829	0.0954732	0.129136	0.0586048	0.0719415	0.0508464	0.335663	Q96KB5	Lymphokine-activated killer T-cell-originated protein kinase OS=Homo sapiens OX=9606 GN=PBK PE=1 SV=30	unknown	CYTOSOL	0.906259	CYTOSOL
O43166	0.150061	0.196133	0.0513021	0.0736637	0.0640411	0.0477848	0.049425	0.186237	0.16526	0.0160923	0.155484	0.129167	0.0681977	0.0597868	0.0689341	0.0564147	0.0900775	0.206686	0.14688	0.0183721	0.222004	0.164254	0.0698089	0.0464502	0.060008	0.0685021	0.0773823	0.153205	0.121813	0.0165724	O43166	Signal-induced proliferation-associated 1-like protein 1 OS=Homo sapiens OX=9606 GN=SIPA1L1 PE=1 SV=40	unknown	NUCLEUS-CHROMATIN	0.458854	unknown
Q8WW12	0.0405918	0.129172	0.0824673	0.141888	0.147879	0.141888	0.104414	0.0839956	0.0727473	0.0549578	0.0730303	0.0705627	0.101937	0.103425	0.165273	0.139931	0.125889	0.076908	0.0650986	0.077946	0.0484833	0.058885	0.0720721	0.0715933	0.123907	0.150411	0.0827784	0.130522	0.0894373	0.171911	Q8WW12	PEST proteolytic signal-containing nuclear protein OS=Homo sapiens OX=9606 GN=PCNP PE=1 SV=20	unknown	NUCLEUS	0.295166	unknown
Q15631	0.0323129	0.0717774	0.0566893	0.0851648	0.0917495	0.0883918	0.0877813	0.183237	0.138496	0.164399	0.041813	0.0625566	0.0659233	0.0627376	0.0894906	0.108822	0.147884	0.173877	0.11161	0.135286	0.0426458	0.0630659	0.069731	0.0819724	0.112457	0.147508	0.0902839	0.113519	0.0857697	0.193048	Q15631	Translin OS=Homo sapiens OX=9606 GN=TSN PE=1 SV=10	unknown	NUCLEUS	0.54795	unknown
Q15058	0.066143	0.160904	0.0461455	0.0832723	0.0821728	0.0688996	0.0715765	0.219908	0.189808	0.0111699	0.0748823	0.101849	0.0543452	0.0558684	0.0686401	0.0708249	0.118903	0.270141	0.170202	0.0143447	0.130534	0.120843	0.0593379	0.0581323	0.0807503	0.0931887	0.108893	0.187812	0.140867	0.019642	Q15058	Kinesin-like protein KIF14 OS=Homo sapiens OX=9606 GN=KIF14 PE=1 SV=10	unknown	NUCLEUS	0.962891	NUCLEUS
Q86YV5	0.0533775	0.116326	0.0599423	0.0925824	0.0842383	0.0670593	0.0626419	0.205105	0.208479	0.0502485	0.0825397	0.068254	0.0674603	0.0928571	0.0873016	0.113492	0.10873	0.183333	0.130159	0.065873	0.0748733	0.0617377	0.0641771	0.0598611	0.0861325	0.0945768	0.105836	0.195909	0.173579	0.0833177	Q86YV5	Tyrosine-protein kinase PRAG1 OS=Homo sapiens OX=9606 GN=PRAG1 PE=1 SV=40	unknown	NUCLEUS	0.938634	NUCLEUS
A0A087X0R6	0.0459432	0.155476	0.119824	0.20044	0.164069	0.096283	0.0663469	0.0338529	0.0329736	0.0847922	0.0599658	0.0903355	0.121031	0.142851	0.179287	0.120013	0.104665	0.0530044	0.0366797	0.0921674	0.0554701	0.083523	0.115124	0.136614	0.151748	0.147934	0.0731467	0.0670153	0.0426125	0.126812	A0A087X0R6	Sorting nexin-12 OS=Homo sapiens OX=9606 GN=SNX12 PE=1 SV=10	unknown	ER	0.339979	unknown
O94964-2	0.0301107	0.079688	0.0379915	0.0688187	0.0807729	0.0694942	0.0755532	0.285305	0.258776	0.0134894	0.0370984	0.0493048	0.0463681	0.0510828	0.0736575	0.0672047	0.121324	0.329551	0.201834	0.0225747	0.0359177	0.0396721	0.0424254	0.0556911	0.0911864	0.114683	0.129748	0.241443	0.196562	0.0526719	O94964-2	Isoform 2 of Protein SOGA1 OS=Homo sapiens OX=9606 GN=SOGA10	unknown	NUCLEUS	0.920692	NUCLEUS
O00462	0.0295749	0.0965804	0.0499076	0.0924214	0.11414	0.0670055	0.0753235	0.156654	0.183919	0.134473	0.0644397	0.249348	0.26688	0.182066	0.110282	0.0480929	0.0360104	0.018479	0.0110163	0.0133855	0.0848727	0.207688	0.256116	0.158263	0.0888667	0.0803794	0.0509236	0.01997	0.0144783	0.0384423	O00462	Beta-mannosidase OS=Homo sapiens OX=9606 GN=MANBA PE=2 SV=30	unknown	NUCLEUS	0.246385	unknown
P27695	0.0854069	0.120093	0.054854	0.0985959	0.0962904	0.0828937	0.080879	0.162277	0.129959	0.0887509	0.10419	0.0694547	0.0612786	0.0695386	0.101605	0.0773118	0.118159	0.205493	0.13488	0.0580888	0.0949208	0.0759833	0.0479925	0.0673528	0.103799	0.136353	0.0980261	0.176007	0.117736	0.0818293	P27695	DNA-(apurinic or apyrimidinic site) lyase OS=Homo sapiens OX=9606 GN=APEX1 PE=1 SV=20	NUCLEUS	NUCLEUS	1	NUCLEUS
Q7L5Y9	0.033078	0.102019	0.0414345	0.0908774	0.0976671	0.0745125	0.0480501	0.108287	0.203343	0.200731	0.0327759	0.053769	0.0674813	0.0604065	0.0896321	0.086725	0.0827373	0.132287	0.166529	0.227656	0.0323197	0.0424934	0.0510932	0.0595245	0.0713282	0.0931932	0.0586814	0.130965	0.189084	0.271317	Q7L5Y9	Macrophage erythroblast attacher OS=Homo sapiens OX=9606 GN=MAEA PE=1 SV=10	unknown	PROTEASOME	0.336463	unknown
A0A1W2PNP0	0.0511774	0.17303	0.148049	0.268269	0.204126	0.0996384	0.0386955	0.0104155	0.00359958	0.00299965	0.0701028	0.116658	0.149827	0.205368	0.202804	0.122586	0.0817239	0.0233833	0.0165377	0.0110094	0.0711764	0.118795	0.147195	0.176655	0.19093	0.155115	0.0801554	0.0254237	0.0164952	0.0180589	A0A1W2PNP0	GPI transamidase component PIG-T (Fragment) OS=Homo sapiens OX=9606 GN=PIGT PE=1 SV=10	unknown	ER	0.952431	ER
J3QRU8	0.039949	0.0922227	0.0437739	0.0743731	0.0883978	0.0862728	0.0594985	0.246069	0.240544	0.0288993	0.0473457	0.0544289	0.0537578	0.0643454	0.0771697	0.0738891	0.131077	0.262228	0.214659	0.0211005	0.0391876	0.0317802	0.0454002	0.0360812	0.0716846	0.0905615	0.0805257	0.307527	0.238949	0.0583035	J3QRU8	ARF GTPase-activating protein GIT1 OS=Homo sapiens OX=9606 GN=GIT1 PE=1 SV=10	unknown	NUCLEUS	0.93392	NUCLEUS
Q9BRP4	0.0342801	0.0901077	0.0842311	0.0587659	0.117532	0.100881	0.0783546	0.0607248	0.0959843	0.279138	0.0605937	0.0732005	0.0756405	0.0671004	0.116714	0.0976007	0.0626271	0.0858072	0.0793005	0.281415	0.0372758	0.0470852	0.0596973	0.0501682	0.0888453	0.100336	0.0504484	0.0675448	0.0927691	0.40583	Q9BRP4	Proteasomal ATPase-associated factor 1 OS=Homo sapiens OX=9606 GN=PAAF1 PE=1 SV=20.001	unknown	CYTOSOL	0.883817	CYTOSOL
A0A0C4DFL7	0.0419921	0.192965	0.131113	0.280597	0.192765	0.0971604	0.0354995	0.011238	0.0100636	0.00660721	0.0585478	0.120464	0.159438	0.204755	0.202845	0.133451	0.093945	0.0139598	0.00675996	0.00583394	0.0561633	0.114855	0.117029	0.198828	0.205326	0.178815	0.0794131	0.0296057	0.0102545	0.00971103	A0A0C4DFL7	Lanosterol 14-alpha demethylase OS=Homo sapiens OX=9606 GN=CYP51A1 PE=1 SV=10	unknown	ER	0.924236	ER
J3KR97	0.0306314	0.108822	0.0759516	0.0903717	0.115987	0.0821317	0.0732647	0.0527541	0.0612629	0.308822	0.0396766	0.0676354	0.0906792	0.0733697	0.100046	0.0965915	0.0857641	0.0635752	0.0475834	0.335079	0.0373522	0.0538061	0.0632624	0.0681087	0.0843735	0.1113	0.0546809	0.0693853	0.0547991	0.402931	J3KR97	Tubulin-specific chaperone D OS=Homo sapiens OX=9606 GN=TBCD PE=1 SV=10	unknown	CYTOSOL	0.924993	CYTOSOL
Q5TCU3	0.0311308	0.0837912	0.0849058	0.0834979	0.105125	0.0806821	0.0829113	0.0530124	0.0820313	0.312912	0.0456674	0.0686475	0.0873829	0.0800245	0.110895	0.0945417	0.0853204	0.0686475	0.0492069	0.309666	0.0410847	0.053227	0.0705358	0.0611475	0.0809778	0.0924879	0.0478426	0.0646064	0.051454	0.436636	Q5TCU3	Tropomyosin beta chain OS=Homo sapiens OX=9606 GN=TPM2 PE=1 SV=10	unknown	CYTOSOL	0.893743	CYTOSOL
G3V4K3	0.037656	0.0991546	0.0492327	0.0839909	0.0860024	0.0644807	0.0726252	0.276055	0.220689	0.0101138	0.0444615	0.0524582	0.055305	0.0608387	0.0752007	0.0717142	0.137415	0.30784	0.180501	0.0142661	0.0521747	0.0613661	0.0686651	0.0892407	0.116875	0.137751	0.13721	0.188844	0.113811	0.0340622	G3V4K3	Spermatogenesis-defective protein 39 homolog OS=Homo sapiens OX=9606 GN=VIPAS39 PE=1 SV=10	unknown	NUCLEUS	0.835598	unknown
Q7Z2E3	0.0571849	0.123495	0.0538896	0.10968	0.106512	0.0842311	0.0863096	0.194849	0.156574	0.0272743	0.070138	0.0732407	0.0677952	0.0745283	0.0914348	0.0823589	0.135379	0.216725	0.146967	0.0414327	0.0847896	0.0640453	0.0552751	0.065178	0.101942	0.11178	0.121165	0.190841	0.146117	0.0588673	Q7Z2E3	Aprataxin OS=Homo sapiens OX=9606 GN=APTX PE=1 SV=20	unknown	NUCLEUS	0.875371	NUCLEUS
P08133	0.0299484	0.092599	0.0557659	0.111188	0.114286	0.0753873	0.0719449	0.0578313	0.0784854	0.312565	0.0519567	0.0828409	0.0907571	0.079496	0.149794	0.0991192	0.0921507	0.0487234	0.0379641	0.267198	0.0363087	0.0585144	0.0693325	0.0659601	0.0832165	0.128548	0.0551857	0.0625438	0.0403819	0.400009	P08133	Annexin A6 OS=Homo sapiens OX=9606 GN=ANXA6 PE=1 SV=30	unknown	CYTOSOL	0.901675	CYTOSOL
Q9UJC3	0.0599337	0.11821	0.0734507	0.0916858	0.0971691	0.0872226	0.0770212	0.142821	0.117317	0.13517	0.0473084	0.0679473	0.0823584	0.0784311	0.116209	0.111361	0.121418	0.118542	0.081471	0.174954	0.034373	0.0518132	0.0600258	0.0668543	0.0933376	0.124665	0.0949986	0.125819	0.0885393	0.259574	Q9UJC3	Protein Hook homolog 1 OS=Homo sapiens OX=9606 GN=HOOK1 PE=1 SV=20	unknown	CYTOSOL	0.603863	unknown
P26373	0.0305696	0.106745	0.0625732	0.104761	0.109063	0.0933008	0.102349	0.21871	0.162517	0.00941143	0.0440662	0.0668744	0.0780565	0.115915	0.14162	0.105696	0.167686	0.170674	0.106448	0.00296484	0.0324459	0.0497471	0.0590427	0.0816948	0.11485	0.124269	0.154435	0.237904	0.141993	0.00361723	P26373	60S ribosomal protein L13 OS=Homo sapiens OX=9606 GN=RPL13 PE=1 SV=40	RIBOSOME	RIBOSOME	1	RIBOSOME
Q12792	0.0347515	0.140247	0.0697916	0.107862	0.102782	0.0825203	0.0529643	0.0420251	0.0703111	0.296744	0.0532073	0.0810069	0.102964	0.0804188	0.118119	0.106513	0.0959849	0.05754	0.0615002	0.242746	0.0477512	0.0678924	0.0681577	0.0788303	0.0845237	0.114195	0.0554853	0.087952	0.0838707	0.311342	Q12792	Twinfilin-1 OS=Homo sapiens OX=9606 GN=TWF1 PE=1 SV=30	unknown	CYTOSOL	0.919653	CYTOSOL
Q8N573	0.0470636	0.135157	0.0957361	0.105122	0.116251	0.114508	0.100429	0.0454545	0.0871547	0.153124	0.0425669	0.0794337	0.103797	0.0849499	0.111796	0.146732	0.107474	0.0698722	0.0661947	0.187184	0.0379347	0.0482086	0.0814015	0.056902	0.0943098	0.129347	0.0603267	0.0985248	0.0819283	0.311117	Q8N573	Oxidation resistance protein 1 OS=Homo sapiens OX=9606 GN=OXR1 PE=1 SV=20	unknown	CYTOSOL	0.766067	unknown
P78417	0.0339995	0.115536	0.0731323	0.0879593	0.108875	0.090132	0.0727742	0.0419741	0.04546	0.330158	0.0571074	0.0908747	0.12041	0.102761	0.13932	0.125993	0.126929	0.0676067	0.0493454	0.119654	0.0465456	0.0738646	0.0852524	0.0956457	0.121346	0.160268	0.0722462	0.103212	0.0569779	0.184642	P78417	Glutathione S-transferase omega-1 OS=Homo sapiens OX=9606 GN=GSTO1 PE=1 SV=20	unknown	CYTOSOL	0.914413	CYTOSOL
Q9Y5A7	0.0391485	0.138733	0.0614142	0.123318	0.107169	0.102031	0.0604355	0.0535845	0.0883288	0.225838	0.04428	0.0609012	0.0763537	0.0673938	0.10635	0.110765	0.101675	0.0923257	0.0798598	0.260096	0.0356525	0.0509748	0.05956	0.0699934	0.0821558	0.11441	0.0567579	0.0757765	0.106302	0.348417	Q9Y5A7	NEDD8 ultimate buster 1 OS=Homo sapiens OX=9606 GN=NUB1 PE=1 SV=20	unknown	CYTOSOL	0.902137	CYTOSOL
Q6PGP7	0.0316863	0.0784434	0.0498939	0.0965212	0.0980542	0.0798231	0.0749057	0.267052	0.214693	0.00892689	0.0365314	0.0542025	0.0618853	0.0724646	0.0866847	0.0853641	0.137064	0.261812	0.185678	0.0183131	0.0293921	0.0424	0.0478093	0.0644565	0.0955617	0.117483	0.124378	0.26895	0.190015	0.0195545	Q6PGP7	Tetratricopeptide repeat protein 37 OS=Homo sapiens OX=9606 GN=TTC37 PE=1 SV=10	unknown	NUCLEUS	0.867977	NUCLEUS
P48556	0.0194025	0.048951	0.0401317	0.0474525	0.0573801	0.0522602	0.0431912	0.156172	0.400365	0.134693	0.0247522	0.0380545	0.0549098	0.0408059	0.0680279	0.0692304	0.0649624	0.154948	0.284417	0.199892	0.0204737	0.0290474	0.0393086	0.0380894	0.0492382	0.0624451	0.0359338	0.15265	0.366302	0.206512	P48556	26S proteasome non-ATPase regulatory subunit 8 OS=Homo sapiens OX=9606 GN=PSMD8 PE=1 SV=20	PROTEASOME	PROTEASOME	1	PROTEASOME
Q8IWJ2	0.0956525	0.258458	0.154612	0.121918	0.0898506	0.0649183	0.0686816	0.0527657	0.0512368	0.0419068	0.135358	0.159006	0.122309	0.0897799	0.101999	0.0969615	0.094716	0.0876962	0.059334	0.0528403	0.0957874	0.208905	0.184476	0.120791	0.102887	0.0746985	0.0439004	0.0584643	0.036488	0.0736023	Q8IWJ2	GRIP and coiled-coil domain-containing protein 2 OS=Homo sapiens OX=9606 GN=GCC2 PE=1 SV=40	unknown	GOLGI	0.502243	GOLGI
O75449	0.0413155	0.120334	0.0574202	0.0848886	0.101972	0.10295	0.0787176	0.202363	0.155178	0.0548615	0.0898275	0.092207	0.097561	0.111243	0.0981559	0.107079	0.12909	0.101725	0.137418	0.035693	0.0525504	0.0534139	0.0547092	0.0610621	0.0850552	0.113489	0.0961574	0.181891	0.145809	0.155863	O75449	Katanin p60 ATPase-containing subunit A1 OS=Homo sapiens OX=9606 GN=KATNA1 PE=1 SV=10	unknown	NUCLEUS	0.861885	NUCLEUS
P54578	0.0265621	0.0717927	0.0563628	0.0700933	0.0867916	0.0728394	0.0586287	0.112713	0.253787	0.190429	0.0387613	0.053434	0.076551	0.0648142	0.0982699	0.0951173	0.0886862	0.0993883	0.175548	0.20943	0.0339055	0.0497699	0.0539762	0.060057	0.0823818	0.111337	0.0482052	0.0962322	0.159357	0.304778	P54578	Ubiquitin carboxyl-terminal hydrolase 14 OS=Homo sapiens OX=9606 GN=USP14 PE=1 SV=30	unknown	PROTEASOME	0.335782	unknown
P07305	0.495326	0.238881	0.0238203	0.0422509	0.0468491	0.0313207	0.0354289	0.0469245	0.0319614	0.00723654	0.547734	0.136362	0.0494935	0.0503802	0.044872	0.0322971	0.0463767	0.0544912	0.0299863	0.00800709	0.584487	0.221588	0.0368742	0.0236353	0.0324262	0.0287151	0.0253198	0.0246881	0.0112913	0.0109754	P07305	Histone H1.0 OS=Homo sapiens OX=9606 GN=H1F0 PE=1 SV=30	NUCLEUS-CHROMATIN	NUCLEUS-CHROMATIN	1	NUCLEUS-CHROMATIN
O14787-2	0.039586	0.0835705	0.0770505	0.0852264	0.111358	0.0939715	0.0872445	0.0566106	0.0866753	0.278706	0.0449456	0.0590645	0.0670562	0.0614276	0.0751428	0.116419	0.0948547	0.0706304	0.0576989	0.35276	0.0376707	0.047825	0.0549536	0.0619555	0.0814403	0.101385	0.0536546	0.0724107	0.0735672	0.415138	O14787-2	Isoform 2 of Transportin-2 OS=Homo sapiens OX=9606 GN=TNPO20	unknown	CYTOSOL	0.890557	CYTOSOL
Q9BWJ5	0.0400098	0.0525668	0.0475194	0.0579835	0.100579	0.080389	0.105503	0.275514	0.160655	0.0792811	0.056687	0.0474898	0.0542852	0.0466892	0.075062	0.0909375	0.106051	0.251469	0.174845	0.0964832	0.063408	0.0432766	0.0487156	0.0437946	0.0687999	0.093452	0.0764993	0.204751	0.187092	0.17021	Q9BWJ5	Splicing factor 3B subunit 5 OS=Homo sapiens OX=9606 GN=SF3B5 PE=1 SV=10	unknown	NUCLEUS	0.92359	NUCLEUS
D6RIU2	0.117547	0.16711	0.118876	0.179453	0.16578	0.0883023	0.109001	0.0326624	0.0104444	0.0108242	0.122809	0.162559	0.148585	0.146936	0.117688	0.116646	0.117428	0.0378407	0.0158827	0.0136261	0.198523	0.192534	0.123565	0.108095	0.120172	0.0881325	0.0630801	0.0431181	0.0155704	0.0472103	D6RIU2	Claudin domain-containing protein 1 (Fragment) OS=Homo sapiens OX=9606 GN=CLDND1 PE=1 SV=10	unknown	PM	0.780528	PM
Q13888	0.102974	0.111846	0.039833	0.0873195	0.0784484	0.0462689	0.0747956	0.217603	0.209776	0.0311358	0.120304	0.0592834	0.0440825	0.0423453	0.0636265	0.0660152	0.104235	0.281433	0.195657	0.0230185	0.0986364	0.0545455	0.0407576	0.0543939	0.069697	0.0945455	0.102348	0.246136	0.1925	0.0464394	Q13888	General transcription factor IIH subunit 2 OS=Homo sapiens OX=9606 GN=GTF2H2 PE=1 SV=10	unknown	NUCLEUS	0.966926	NUCLEUS
F6U1T9	0.0321637	0.103527	0.107913	0.116594	0.133589	0.108644	0.113761	0.0604441	0.0555099	0.167855	0.074288	0.0956617	0.131824	0.123679	0.152562	0.14898	0.13812	0.0398013	0.0462712	0.0488129	0.0665438	0.119757	0.0860518	0.125935	0.144251	0.214913	0.0722879	0.0609082	0.0412919	0.0680611	F6U1T9	Calcineurin subunit B type 1 OS=Homo sapiens OX=9606 GN=PPP3R1 PE=1 SV=10	unknown	CYTOSOL	0.398705	unknown
P84243	0.517552	0.336099	0.0094518	0.0295181	0.0335771	0.0191247	0.0130613	0.0177694	0.0168135	0.00703356	0.664631	0.159603	0.00994077	0.043069	0.0358832	0.019652	0.0250471	0.0212131	0.0113412	0.00961936	0.632102	0.240235	0.00601336	0.0174404	0.031466	0.0225709	0.0143921	0.0151583	0.00956141	0.0110606	P84243	Histone H3.3 OS=Homo sapiens OX=9606 GN=H3F3A PE=1 SV=20	NUCLEUS-CHROMATIN	NUCLEUS-CHROMATIN	1	NUCLEUS-CHROMATIN
Q99961	0.0400646	0.160039	0.0851408	0.113813	0.118167	0.107706	0.0773633	0.0522511	0.0742414	0.171213	0.0481516	0.0767685	0.102114	0.0810445	0.141677	0.141823	0.10904	0.0693493	0.0661879	0.163843	0.0451513	0.0652115	0.0840017	0.0835517	0.103065	0.135358	0.058798	0.0887435	0.0690049	0.267115	Q99961	Endophilin-A2 OS=Homo sapiens OX=9606 GN=SH3GL1 PE=1 SV=10	unknown	CYTOSOL	0.830292	unknown
Q86UL3	0.04127	0.171149	0.138184	0.24762	0.204625	0.110011	0.0444004	0.0180157	0.013927	0.0107967	0.0586797	0.102371	0.151483	0.213245	0.198682	0.128521	0.0902519	0.0245562	0.0144573	0.0177527	0.0690608	0.072744	0.143646	0.122468	0.14733	0.12523	0.0837937	0.107735	0.0552486	0.072744	Q86UL3	Glycerol-3-phosphate acyltransferase 4 OS=Homo sapiens OX=9606 GN=GPAT4 PE=1 SV=10	unknown	ER	0.785735	unknown
H0Y9X1	0.0397881	0.112005	0.0550321	0.11156	0.0972868	0.0752093	0.0749262	0.1729	0.229307	0.0319841	0.0572838	0.0743169	0.0856991	0.10769	0.13448	0.117526	0.157137	0.114754	0.129042	0.0220712	0.0453326	0.0526316	0.0575633	0.0764223	0.112089	0.131855	0.103251	0.21822	0.175412	0.0272232	H0Y9X1	Translation machinery-associated protein 16 (Fragment) OS=Homo sapiens OX=9606 GN=TMA16 PE=1 SV=10	unknown	NUCLEUS	0.57759	unknown
Q96QD8	0.0790206	0.161287	0.131145	0.17993	0.160453	0.132536	0.101651	0.0408551	0.0107123	0.00241143	0.0861808	0.135246	0.137169	0.148586	0.161845	0.117158	0.144085	0.0507018	0.0112534	0.0077751	0.114946	0.158141	0.143451	0.14643	0.154802	0.127273	0.088341	0.0534155	0.00924499	0.0039548	Q96QD8	Sodium-coupled neutral amino acid transporter 2 OS=Homo sapiens OX=9606 GN=SLC38A2 PE=1 SV=20	unknown	PM	0.654175	PM
Q06481	0.053285	0.177051	0.131824	0.23986	0.191587	0.108691	0.0590685	0.0203964	0.00828964	0.00994756	0.0585276	0.120805	0.148669	0.169792	0.176722	0.128542	0.103052	0.034414	0.0270565	0.0324204	0.0719256	0.115329	0.14826	0.16166	0.181295	0.149948	0.0900792	0.0474337	0.0139511	0.0201171	Q06481	Amyloid-like protein 2 OS=Homo sapiens OX=9606 GN=APLP2 PE=1 SV=20	unknown	ER	0.852125	unknown
Q92620	0.0407524	0.106398	0.0490803	0.0860308	0.0915707	0.075965	0.0684155	0.179828	0.190691	0.111268	0.0492302	0.046997	0.056641	0.0572149	0.0789231	0.0781121	0.112022	0.222073	0.216471	0.0823165	0.0500696	0.0469561	0.0525756	0.0651057	0.0834831	0.104493	0.0649538	0.137375	0.130718	0.26427	Q92620	Pre-mRNA-splicing factor ATP-dependent RNA helicase PRP16 OS=Homo sapiens OX=9606 GN=DHX38 PE=1 SV=20	unknown	NUCLEUS	0.780527	unknown
P46926	0.0287429	0.0913155	0.0578889	0.0926554	0.102817	0.0815211	0.0608177	0.0447151	0.0696279	0.369898	0.0421442	0.0719688	0.0991181	0.0746992	0.100472	0.118363	0.10274	0.0751726	0.0655613	0.249761	0.0418855	0.0647132	0.071537	0.0829683	0.0872616	0.122707	0.0591982	0.0791637	0.0628458	0.32772	P46926	Glucosamine-6-phosphate isomerase 1 OS=Homo sapiens OX=9606 GN=GNPDA1 PE=1 SV=10	unknown	CYTOSOL	0.920027	CYTOSOL
A0A1B0GVH5	0.0227015	0.101022	0.0885358	0.091941	0.0987514	0.190125	0.0942111	0.0652667	0.0664018	0.181044	0.0452262	0.0747101	0.10399	0.0813664	0.122346	0.148073	0.103377	0.0615403	0.056395	0.202977	0.0455822	0.0528345	0.0708887	0.0713994	0.101634	0.141062	0.0605209	0.0924923	0.0739019	0.289683	A0A1B0GVH5	Alpha-ketoglutarate-dependent dioxygenase FTO OS=Homo sapiens OX=9606 GN=FTO PE=1 SV=10	unknown	CYTOSOL	0.491114	unknown
Q8NHU6	0.0247134	0.0816069	0.0454569	0.0852087	0.0895467	0.0830529	0.103008	0.277316	0.202256	0.00783468	0.0428651	0.0554072	0.0580265	0.0667405	0.0918249	0.0802901	0.15922	0.246512	0.169798	0.0293155	0.046259	0.051172	0.0547236	0.0646975	0.094501	0.108826	0.133834	0.227803	0.16278	0.0554043	Q8NHU6	Tudor domain-containing protein 7 OS=Homo sapiens OX=9606 GN=TDRD7 PE=1 SV=20	unknown	NUCLEUS	0.753314	unknown
Q96EB6	0.0356998	0.0851927	0.0665314	0.0807302	0.128195	0.096146	0.0596349	0.0470588	0.0839757	0.316836	0.036029	0.0630292	0.0809141	0.0731813	0.12027	0.115561	0.0958182	0.0677812	0.0539139	0.293503	0.0446334	0.0573193	0.0607731	0.0730606	0.0878719	0.129317	0.0553268	0.0904623	0.064559	0.336676	Q96EB6	NAD-dependent protein deacetylase sirtuin-1 OS=Homo sapiens OX=9606 GN=SIRT1 PE=1 SV=20	unknown	CYTOSOL	0.933866	CYTOSOL
Q99569	0.192152	0.259665	0.085401	0.123197	0.141662	0.0810733	0.0464512	0.0317369	0.026255	0.0124062	0.201585	0.166813	0.100792	0.118618	0.12544	0.0860475	0.0891285	0.0552377	0.0367518	0.0195863	0.255415	0.230078	0.136085	0.0833674	0.0792808	0.0690642	0.0563956	0.044953	0.0245198	0.0208418	Q99569	Plakophilin-4 OS=Homo sapiens OX=9606 GN=PKP4 PE=1 SV=20	unknown	PM	0.531944	unknown
Q9NP77	0.0684243	0.113059	0.0591048	0.0951563	0.117106	0.0922134	0.059718	0.0399755	0.0500307	0.305212	0.0601729	0.0767602	0.0809952	0.0670549	0.106758	0.106406	0.0944062	0.0617611	0.0485266	0.297159	0.0750877	0.0508772	0.0684211	0.0575439	0.0617544	0.0926316	0.0564912	0.111228	0.0610526	0.364912	Q9NP77	RNA polymerase II subunit A C-terminal domain phosphatase SSU72 OS=Homo sapiens OX=9606 GN=SSU72 PE=1 SV=10	unknown	CYTOSOL	0.905626	CYTOSOL
O14976	0.0428337	0.110651	0.0729921	0.104077	0.115336	0.0966642	0.111245	0.128763	0.12392	0.0935173	0.0430255	0.06648	0.0785743	0.0815616	0.114473	0.12795	0.157908	0.136605	0.0914965	0.101926	0.0440272	0.060175	0.0746024	0.0763228	0.104622	0.131878	0.0854805	0.123669	0.108469	0.190753	O14976	Cyclin-G-associated kinase OS=Homo sapiens OX=9606 GN=GAK PE=1 SV=20	unknown	NUCLEUS	0.569866	unknown
J3KQN4	0.0214488	0.0977609	0.0697027	0.109862	0.125851	0.116975	0.143883	0.207096	0.106837	0.000582718	0.0366672	0.0608627	0.0719486	0.0979038	0.123529	0.0903812	0.161824	0.228515	0.122605	0.00576293	0.0276753	0.039009	0.0591943	0.0701107	0.116851	0.133808	0.151357	0.249561	0.141671	0.0107626	J3KQN4	60S ribosomal protein L36a OS=Homo sapiens OX=9606 GN=RPL36A PE=1 SV=10	unknown	RIBOSOME	0.896118	RIBOSOME
O60911	0.0308748	0.379074	0.150632	0.227507	0.100577	0.0436613	0.0208951	0.0169967	0.0184001	0.0113831	0.0581511	0.240225	0.257345	0.194058	0.113486	0.0547824	0.0478794	0.0144687	0.00916722	0.0104374	0.0877525	0.274726	0.278725	0.180029	0.0893308	0.0367214	0.020202	0.0131524	0.00505051	0.0143098	O60911	Cathepsin L2 OS=Homo sapiens OX=9606 GN=CTSV PE=1 SV=20	unknown	LYSOSOME	0.493748	unknown
Q9UKV8	0.0288066	0.101667	0.0622585	0.123875	0.134645	0.119955	0.136905	0.174248	0.10076	0.0168794	0.0323058	0.0552652	0.0698248	0.088851	0.119823	0.123263	0.211781	0.198221	0.0879843	0.0126797	0.0302653	0.0424941	0.0589975	0.0801183	0.119005	0.148224	0.196869	0.209603	0.0878921	0.0265318	Q9UKV8	Protein argonaute-2 OS=Homo sapiens OX=9606 GN=AGO2 PE=1 SV=30	unknown	RIBOSOME	0.59712	unknown
Q86VP6	0.0653621	0.0944364	0.0634854	0.080101	0.0986423	0.079942	0.0784321	0.122661	0.14575	0.171187	0.0660788	0.0642575	0.0685344	0.0632963	0.087782	0.0846104	0.0902182	0.133784	0.100087	0.241351	0.0623931	0.0590152	0.06132	0.0591219	0.0721457	0.0968639	0.049909	0.0849499	0.0963974	0.357884	Q86VP6	Cullin-associated NEDD8-dissociated protein 1 OS=Homo sapiens OX=9606 GN=CAND1 PE=1 SV=20	unknown	CYTOSOL	0.670207	unknown
J3KNR0	0.0487624	0.0978658	0.0456132	0.0805151	0.0778473	0.0514502	0.0618205	0.256068	0.267682	0.0123761	0.0643786	0.0647294	0.0699638	0.0740111	0.0794075	0.0713399	0.114295	0.254412	0.186282	0.0211807	0.0355788	0.0397855	0.04281	0.0566401	0.0843277	0.102832	0.129035	0.256228	0.212813	0.0399505	J3KNR0	Non-specific serine/threonine protein kinase OS=Homo sapiens OX=9606 GN=MARK3 PE=1 SV=20	unknown	NUCLEUS	0.932959	NUCLEUS
Q9P003	0.0412281	0.178679	0.129574	0.244246	0.200203	0.0980202	0.0605057	0.0308915	0.0126546	0.00399745	0.0531208	0.117714	0.160981	0.184374	0.172873	0.131364	0.11576	0.049492	0.00907213	0.00524788	0.0580859	0.0933654	0.154929	0.151518	0.172586	0.146669	0.118078	0.0784845	0.0157504	0.0105337	Q9P003	Protein cornichon homolog 4 OS=Homo sapiens OX=9606 GN=CNIH4 PE=1 SV=10	unknown	ER	0.806967	unknown
Q92890-1	0.0457608	0.177432	0.0964526	0.192076	0.152267	0.0989394	0.0574933	0.0610853	0.0745818	0.0439117	0.058425	0.0869576	0.0939548	0.106268	0.145506	0.102411	0.0876004	0.136927	0.0936333	0.0883175	0.0574223	0.0763306	0.106236	0.120381	0.141218	0.137122	0.0844786	0.0971385	0.0866158	0.0930571	Q92890-1	Isoform Long of Ubiquitin recognition factor in ER-associated degradation protein 1 OS=Homo sapiens OX=9606 GN=UFD10	unknown	NUCLEUS	0.214766	unknown
Q13561	0.0353927	0.0729005	0.0658905	0.0842012	0.112805	0.0918659	0.139708	0.161946	0.153073	0.082217	0.0525459	0.0675172	0.0673712	0.0720379	0.1097	0.096014	0.143499	0.172105	0.108276	0.110934	0.0380914	0.0420201	0.0527474	0.0623004	0.0881556	0.113819	0.120974	0.193189	0.155767	0.132936	Q13561	Dynactin subunit 2 OS=Homo sapiens OX=9606 GN=DCTN2 PE=1 SV=40	unknown	NUCLEUS	0.615958	unknown
Q8IWZ3-6	0.0285968	0.0923582	0.0496228	0.0836957	0.0868377	0.0760362	0.0857726	0.255658	0.220857	0.0205645	0.0343526	0.0510734	0.0563871	0.0625841	0.0902911	0.0873997	0.140143	0.259107	0.181935	0.0367265	0.0300072	0.0401643	0.0468244	0.066758	0.100867	0.124751	0.14002	0.232663	0.177089	0.0408574	Q8IWZ3-6	Isoform 6 of Ankyrin repeat and KH domain-containing protein 1 OS=Homo sapiens OX=9606 GN=ANKHD10	unknown	NUCLEUS	0.765355	unknown
P62820	0.0664162	0.210799	0.133752	0.161351	0.132347	0.103547	0.0785546	0.0487069	0.0266023	0.0379229	0.073036	0.137929	0.138802	0.153823	0.16022	0.10591	0.122071	0.0518148	0.0225754	0.0338186	0.0687665	0.124985	0.122553	0.140594	0.148206	0.132971	0.0881271	0.0901842	0.03255	0.0510636	P62820	Ras-related protein Rab-1A OS=Homo sapiens OX=9606 GN=RAB1A PE=1 SV=30	unknown	GOLGI	0.336541	unknown
P48059	0.107847	0.173598	0.0662597	0.126415	0.107593	0.0766247	0.0586926	0.128704	0.129213	0.0250541	0.124321	0.100012	0.0783569	0.0792014	0.0873447	0.0772711	0.100857	0.184039	0.13729	0.0313066	0.200893	0.146784	0.0994027	0.0863539	0.0771907	0.074523	0.0691295	0.112509	0.0809024	0.0523111	P48059	LIM and senescent cell antigen-like-containing domain protein 1 OS=Homo sapiens OX=9606 GN=LIMS1 PE=1 SV=40	unknown	NUCLEUS	0.446528	unknown
Q5VIR6-4	0.0454802	0.105872	0.0600492	0.117096	0.119071	0.095192	0.0920284	0.201427	0.154858	0.00892677	0.0562294	0.0744519	0.0710195	0.0742398	0.0915174	0.0895505	0.153879	0.229198	0.138529	0.0213849	0.0620785	0.0750808	0.0904556	0.108539	0.136804	0.130172	0.117264	0.148312	0.102225	0.0290684	Q5VIR6-4	Isoform 4 of Vacuolar protein sorting-associated protein 53 homolog OS=Homo sapiens OX=9606 GN=VPS530	unknown	RIBOSOME	0.475515	unknown
P11388	0.234257	0.21158	0.0439177	0.0803803	0.0746752	0.0549708	0.0532298	0.124878	0.111084	0.0110263	0.351685	0.110327	0.0452571	0.0587759	0.0685975	0.0535173	0.080199	0.131791	0.0880304	0.0118199	0.343771	0.150153	0.0458537	0.049198	0.0681545	0.0737722	0.0720369	0.104876	0.0775119	0.0146732	P11388	DNA topoisomerase 2-alpha OS=Homo sapiens OX=9606 GN=TOP2A PE=1 SV=30	NUCLEUS-CHROMATIN	NUCLEUS-CHROMATIN	1	NUCLEUS-CHROMATIN
Q99717	0.059207	0.126562	0.0646388	0.100217	0.0945139	0.0657251	0.0589354	0.154264	0.209397	0.0665399	0.076555	0.0704306	0.0629665	0.0755981	0.0780861	0.0780861	0.0943541	0.185455	0.171866	0.106603	0.0689729	0.0545767	0.0644607	0.065535	0.0988397	0.0915342	0.0842286	0.172969	0.175333	0.12355	Q99717	Mothers against decapentaplegic homolog 5 OS=Homo sapiens OX=9606 GN=SMAD5 PE=1 SV=10	unknown	NUCLEUS	0.890953	NUCLEUS
P13010	0.0459992	0.0723942	0.0486693	0.0780541	0.0950797	0.0947684	0.105503	0.229362	0.170121	0.0600491	0.0502433	0.04605	0.051161	0.0529868	0.0852715	0.0792014	0.122976	0.238576	0.14732	0.126214	0.041922	0.038995	0.043901	0.0554001	0.0827648	0.10753	0.128142	0.233303	0.160313	0.107729	P13010	X-ray repair cross-complementing protein 5 OS=Homo sapiens OX=9606 GN=XRCC5 PE=1 SV=30	unknown	NUCLEUS	0.912524	NUCLEUS
P21283	0.0491134	0.135932	0.101804	0.130383	0.118723	0.0818493	0.0748303	0.110525	0.116287	0.0805538	0.0551105	0.104918	0.116418	0.0997559	0.0989637	0.103845	0.122603	0.126896	0.0862882	0.0852021	0.0530784	0.0755833	0.092501	0.0956379	0.102318	0.109013	0.0783769	0.140897	0.119969	0.132626	P21283	V-type proton ATPase subunit C 1 OS=Homo sapiens OX=9606 GN=ATP6V1C1 PE=1 SV=40	unknown	NUCLEUS	0.489844	unknown
P05026	0.164799	0.220895	0.112403	0.164562	0.135708	0.095915	0.0674047	0.0265286	0.00665856	0.00512604	0.156819	0.187891	0.136368	0.147075	0.138173	0.0924589	0.0994535	0.0264316	0.0074414	0.00788822	0.23836	0.226846	0.151482	0.11238	0.0960164	0.0756733	0.0489935	0.0262161	0.00884819	0.0151849	P05026	Sodium/potassium-transporting ATPase subunit beta-1 OS=Homo sapiens OX=9606 GN=ATP1B1 PE=1 SV=10	PM	PM	1	PM
A0A0C4DGG1	0.114592	0.185454	0.0826401	0.141336	0.120345	0.101726	0.075449	0.0925912	0.0630879	0.0227785	0.114271	0.115391	0.0980144	0.0950588	0.113579	0.0993254	0.106548	0.138035	0.070436	0.0493409	0.147885	0.132143	0.120675	0.0702392	0.0964629	0.101356	0.0777428	0.116904	0.0777234	0.0588679	A0A0C4DGG1	Protein kinase C and casein kinase substrate in neurons protein 3 (Fragment) OS=Homo sapiens OX=9606 GN=PACSIN3 PE=1 SV=10	unknown	NUCLEUS	0.277016	unknown
Q96KG9	0.071621	0.164597	0.0741507	0.113674	0.0967212	0.0841711	0.0810171	0.131546	0.124023	0.0584795	0.0871584	0.0783742	0.0764301	0.0809663	0.0995068	0.0974547	0.115383	0.180509	0.119523	0.0646938	0.068649	0.0671043	0.0636815	0.0712994	0.101525	0.119833	0.0815152	0.138298	0.135209	0.152885	Q96KG9	N-terminal kinase-like protein OS=Homo sapiens OX=9606 GN=SCYL1 PE=1 SV=10	unknown	NUCLEUS	0.860429	unknown
Q8WYA6	0.0710657	0.0993984	0.0575227	0.0859489	0.100598	0.0914035	0.0763021	0.123227	0.130147	0.164386	0.0639982	0.0608597	0.0731427	0.0676534	0.103082	0.109811	0.104167	0.132285	0.0987937	0.186208	0.0681094	0.0525343	0.0511822	0.0543205	0.0765896	0.105097	0.075499	0.145428	0.108697	0.262544	Q8WYA6	Beta-catenin-like protein 1 OS=Homo sapiens OX=9606 GN=CTNNBL1 PE=1 SV=10	unknown	CYTOSOL	0.595393	unknown
Q9NZM1	0.104064	0.169134	0.0917756	0.161277	0.171167	0.13608	0.110047	0.0427856	0.00841088	0.00525923	0.112333	0.134955	0.107512	0.131399	0.159103	0.131232	0.16735	0.0420153	0.00718242	0.00691801	0.135879	0.145956	0.115764	0.130285	0.152047	0.143878	0.10779	0.0445079	0.0110842	0.0128094	Q9NZM1	Myoferlin OS=Homo sapiens OX=9606 GN=MYOF PE=1 SV=10	unknown	PM	0.597517	unknown
Q5TBB1	0.0458516	0.113094	0.0520464	0.104199	0.107428	0.0917033	0.0679833	0.101234	0.112088	0.204373	0.0529986	0.062981	0.0730016	0.0674007	0.111598	0.0967004	0.0944525	0.109236	0.101196	0.230435	0.0536397	0.0567367	0.0534873	0.0598718	0.0840515	0.11143	0.075027	0.126877	0.0955004	0.283379	Q5TBB1	Ribonuclease H2 subunit B OS=Homo sapiens OX=9606 GN=RNASEH2B PE=1 SV=10	unknown	CYTOSOL	0.838982	unknown
X6RM59	0.133705	0.368026	0.0952659	0.113744	0.0840714	0.052421	0.0333588	0.0321449	0.0300319	0.0572315	0.137063	0.21502	0.121649	0.0953025	0.0901259	0.0747122	0.071274	0.0374334	0.0281619	0.129259	0.154767	0.205714	0.107677	0.0805298	0.0915918	0.0874816	0.0408484	0.053382	0.0376516	0.140356	X6RM59	5'-nucleotidase OS=Homo sapiens OX=9606 GN=NT5C3A PE=1 SV=10	unknown	NUCLEUS-CHROMATIN	0.340212	unknown
Q96IK1	0.056739	0.149426	0.109074	0.0867472	0.118189	0.0713847	0.122286	0.0770176	0.0826506	0.126485	0.0665581	0.10901	0.101997	0.0797696	0.170309	0.137687	0.0983032	0.0644293	0.0546616	0.117275	0.0692312	0.0984992	0.114542	0.0707262	0.105629	0.1284	0.0637686	0.0806739	0.0687712	0.199758	Q96IK1	Biorientation of chromosomes in cell division protein 1 OS=Homo sapiens OX=9606 GN=BOD1 PE=1 SV=20	unknown	CYTOSOL	0.46555	unknown
F8VUA2	0.0753138	0.197033	0.0920502	0.133511	0.123241	0.083682	0.0764549	0.0810194	0.0920502	0.0456447	0.0879715	0.0978309	0.0968132	0.0977037	0.114497	0.099612	0.109917	0.126646	0.100503	0.0685071	0.0952085	0.0980051	0.0809769	0.08396	0.105338	0.105711	0.0862594	0.140948	0.103163	0.100429	F8VUA2	Charged multivesicular body protein 1a OS=Homo sapiens OX=9606 GN=CHMP1A PE=1 SV=10	unknown	NUCLEUS	0.508029	unknown
Q8WVV9	0.0651979	0.104665	0.05051	0.0997144	0.0999592	0.0901401	0.0926425	0.211424	0.161485	0.0242622	0.0789841	0.0562053	0.0552452	0.0622273	0.0848752	0.0741403	0.150506	0.26056	0.151772	0.0254844	0.0621148	0.0538316	0.0537059	0.0719253	0.104896	0.124912	0.155278	0.224113	0.108095	0.0411284	Q8WVV9	Heterogeneous nuclear ribonucleoprotein L-like OS=Homo sapiens OX=9606 GN=HNRNPLL PE=1 SV=10	unknown	NUCLEUS	0.54391	unknown
Q9H444	0.0265746	0.155871	0.0770194	0.113249	0.119016	0.100085	0.079232	0.0810648	0.110456	0.137432	0.0404574	0.0874662	0.107982	0.0981265	0.13732	0.12959	0.11258	0.0899948	0.0681857	0.128297	0.047305	0.070635	0.101061	0.0815654	0.106042	0.125645	0.07834	0.100738	0.067338	0.22133	Q9H444	Charged multivesicular body protein 4b OS=Homo sapiens OX=9606 GN=CHMP4B PE=1 SV=10	unknown	CYTOSOL	0.700302	unknown
P05121	0.0483657	0.205258	0.139304	0.215959	0.170385	0.0995231	0.0636501	0.0309876	0.0164476	0.0101198	0.05591	0.140754	0.183481	0.18724	0.158253	0.107584	0.105599	0.03955	0.0110655	0.0105625	0.0637897	0.130306	0.155404	0.170612	0.16022	0.133847	0.0927677	0.0541439	0.0177721	0.0211366	P05121	Plasminogen activator inhibitor 1 OS=Homo sapiens OX=9606 GN=SERPINE1 PE=1 SV=10	unknown	ER	0.66747	unknown
P08621	0.0802603	0.103246	0.0330698	0.0699314	0.078518	0.0674788	0.0807883	0.24954	0.222225	0.0149414	0.0972903	0.0497622	0.044141	0.0505189	0.0735713	0.0729317	0.125856	0.255937	0.196959	0.0330337	0.120439	0.0624423	0.0370964	0.0462467	0.0760966	0.0930387	0.111717	0.2545	0.160362	0.0380609	P08621	U1 small nuclear ribonucleoprotein 70 kDa OS=Homo sapiens OX=9606 GN=SNRNP70 PE=1 SV=20	unknown	NUCLEUS	0.976517	NUCLEUS
A0A1B0GUI1	0.0340812	0.0757247	0.043156	0.088127	0.108898	0.113638	0.108697	0.240887	0.17459	0.0122007	0.0386498	0.049781	0.0538263	0.0637207	0.0925019	0.0955166	0.165859	0.272842	0.156403	0.0108993	0.0492796	0.0468627	0.0446028	0.0672337	0.1006	0.127719	0.156282	0.234063	0.1517	0.0216579	A0A1B0GUI1	Ral GTPase-activating protein subunit alpha-1 OS=Homo sapiens OX=9606 GN=RALGAPA1 PE=1 SV=10	unknown	RIBOSOME	0.76545	RIBOSOME
Q7Z2K8	0.136818	0.201876	0.0928976	0.165867	0.147798	0.102365	0.0705918	0.037306	0.0198418	0.0246401	0.17411	0.164829	0.11678	0.128792	0.132443	0.0922131	0.0914829	0.0538911	0.0217637	0.0236951	0.228716	0.202644	0.131904	0.0979241	0.109848	0.0842086	0.0598048	0.0480044	0.0189052	0.0180403	Q7Z2K8	G protein-regulated inducer of neurite outgrowth 1 OS=Homo sapiens OX=9606 GN=GPRIN1 PE=1 SV=20	PM	PM	1	PM
P15531	0.0344005	0.0783721	0.083272	0.0685978	0.0939856	0.0798192	0.0914976	0.0780421	0.0792099	0.312803	0.043916	0.0608398	0.0848865	0.0570373	0.102185	0.100953	0.084458	0.0901885	0.0855291	0.290006	0.0372215	0.0534731	0.070806	0.0594692	0.0772936	0.112025	0.0533748	0.0759502	0.0589122	0.401474	P15531	Nucleoside diphosphate kinase A OS=Homo sapiens OX=9606 GN=NME1 PE=1 SV=10	unknown	CYTOSOL	0.900187	CYTOSOL
Q12899	0.0739437	0.182323	0.0778825	0.148603	0.123598	0.0732872	0.0429697	0.0914299	0.107245	0.0787181	0.105179	0.0976665	0.0937962	0.0914058	0.102675	0.0887877	0.0812749	0.126807	0.0968697	0.115538	0.131701	0.102417	0.0844438	0.0709637	0.0914162	0.0912612	0.064921	0.0906415	0.107995	0.164239	Q12899	Tripartite motif-containing protein 26 OS=Homo sapiens OX=9606 GN=TRIM26 PE=1 SV=10	unknown	NUCLEUS-CHROMATIN	0.467106	unknown
P26196	0.0306107	0.108785	0.0603375	0.111652	0.109544	0.0980724	0.090345	0.205245	0.170843	0.0145648	0.0317125	0.0497335	0.0588983	0.0724113	0.10072	0.0928295	0.156492	0.264202	0.147677	0.0253239	0.03103	0.048315	0.0589977	0.0740745	0.111998	0.126895	0.146881	0.23423	0.132076	0.0355023	P26196	Probable ATP-dependent RNA helicase DDX6 OS=Homo sapiens OX=9606 GN=DDX6 PE=1 SV=20	unknown	RIBOSOME	0.824751	RIBOSOME
Q9NQT5	0.0765248	0.0996169	0.0407994	0.0653412	0.0828415	0.0646163	0.062856	0.226571	0.210935	0.0698975	0.0905413	0.0541059	0.0556129	0.0545601	0.078114	0.0776805	0.1271	0.223277	0.1855	0.0535073	0.0720117	0.059528	0.03923	0.0445666	0.0731235	0.0825895	0.0634033	0.232871	0.215495	0.117182	Q9NQT5	Exosome complex component RRP40 OS=Homo sapiens OX=9606 GN=EXOSC3 PE=1 SV=30	unknown	NUCLEUS	0.958587	NUCLEUS
Q9NRL3	0.0405204	0.0980304	0.084213	0.141884	0.131131	0.0940877	0.075987	0.10459	0.115988	0.113568	0.0431893	0.0744376	0.0894108	0.0959723	0.135256	0.109472	0.11014	0.123897	0.0900618	0.128163	0.0529911	0.0643799	0.0788443	0.0809442	0.100374	0.118977	0.0747928	0.124646	0.110095	0.193955	Q9NRL3	Striatin-4 OS=Homo sapiens OX=9606 GN=STRN4 PE=1 SV=20	unknown	CYTOSOL	0.470569	unknown
O75695	0.131448	0.155158	0.0732113	0.158486	0.159734	0.09401	0.0536606	0.0727953	0.0403494	0.0611481	0.141315	0.171137	0.12349	0.129831	0.143114	0.100351	0.115091	0.0466192	0.0107121	0.0183392	0.23742	0.220506	0.12869	0.0964387	0.0991701	0.0795252	0.0588297	0.0433869	0.0143923	0.0216409	O75695	Protein XRP2 OS=Homo sapiens OX=9606 GN=RP2 PE=1 SV=40	unknown	PM	0.735281	PM
A0A0J9YWL0	0.0820311	0.147518	0.0696478	0.104275	0.10077	0.083145	0.0879934	0.158722	0.133366	0.0325307	0.0834057	0.0794438	0.0749349	0.0786515	0.108969	0.101045	0.147738	0.170603	0.115176	0.0400332	0.0894075	0.0810654	0.0544593	0.0586996	0.0825342	0.102932	0.0993847	0.20179	0.167701	0.0620254	A0A0J9YWL0	Beta/gamma crystallin domain-containing protein 1 OS=Homo sapiens OX=9606 GN=CRYBG1 PE=1 SV=10	unknown	NUCLEUS	0.935154	NUCLEUS
Q9NR33	0.0441324	0.0817452	0.0604313	0.0784855	0.111083	0.0579238	0.0972919	0.0561685	0.0885155	0.324223	0.0534796	0.0699349	0.0740487	0.0620501	0.108673	0.103874	0.0815907	0.0562221	0.0521083	0.338019	0.0634543	0.0808338	0.0707634	0.0637791	0.0807255	0.101678	0.0572821	0.0878181	0.0638874	0.329778	Q9NR33	DNA polymerase epsilon subunit 4 OS=Homo sapiens OX=9606 GN=POLE4 PE=1 SV=20	unknown	CYTOSOL	0.865904	CYTOSOL
Q5VTR2	0.0759599	0.112908	0.0435349	0.0873231	0.0871784	0.0733181	0.0728115	0.217313	0.192198	0.0374552	0.0843159	0.0536595	0.055889	0.0592119	0.0863097	0.0803499	0.127599	0.240557	0.166788	0.0453201	0.0749234	0.05573	0.0419602	0.0599668	0.0959929	0.124974	0.115263	0.216641	0.146682	0.0678663	Q5VTR2	E3 ubiquitin-protein ligase BRE1A OS=Homo sapiens OX=9606 GN=RNF20 PE=1 SV=20	NUCLEUS	NUCLEUS	1	NUCLEUS
K4DIA8	0.241596	0.63678	0.0771911	0.0123457	0.00788412	0.00818971	0.00409485	0.0056839	0.00262804	0.00360592	0.263598	0.502398	0.123686	0.0395959	0.0155118	0.0128585	0.00765384	0.0123482	0.00428615	0.0180631	0.357846	0.417427	0.131687	0.0250492	0.0168188	0.00912507	0.00769368	0.01163	0.00876722	0.013956	K4DIA8	Mitochondrial glutamate carrier 1 (Fragment) OS=Homo sapiens OX=9606 GN=SLC25A22 PE=1 SV=20	unknown	MITOCHONDRIA	0.944337	unknown
Q9NV35	0.0247072	0.106969	0.061054	0.105755	0.120823	0.0898315	0.0591974	0.0351328	0.0552699	0.34126	0.0388999	0.0633399	0.089361	0.0698946	0.104183	0.111693	0.0931489	0.0603096	0.053195	0.315975	0.0386935	0.0614262	0.0748265	0.0798038	0.0899497	0.142522	0.0596076	0.0796602	0.0542235	0.319287	Q9NV35	Nucleotide triphosphate diphosphatase NUDT15 OS=Homo sapiens OX=9606 GN=NUDT15 PE=1 SV=10	unknown	CYTOSOL	0.927442	CYTOSOL
O00629	0.0614923	0.1236	0.0722284	0.104244	0.110863	0.092123	0.0639551	0.0686882	0.0869666	0.215839	0.0736585	0.077773	0.0845921	0.0867789	0.110114	0.128212	0.100705	0.0627536	0.0611423	0.214271	0.052218	0.0617732	0.0598583	0.0682487	0.0912088	0.1302	0.0544686	0.0828776	0.0778039	0.321343	O00629	Importin subunit alpha-3 OS=Homo sapiens OX=9606 GN=KPNA4 PE=1 SV=10	unknown	CYTOSOL	0.89672	CYTOSOL
O60333-3	0.0305063	0.0929909	0.0456776	0.0878384	0.0918459	0.0743028	0.0838309	0.235258	0.187331	0.0704179	0.0348268	0.061513	0.0675113	0.0661648	0.0908312	0.0899743	0.128167	0.216244	0.156506	0.0882605	0.041191	0.0500381	0.0468037	0.0659247	0.0900875	0.115868	0.0973174	0.20938	0.152207	0.131183	O60333-3	Isoform 3 of Kinesin-like protein KIF1B OS=Homo sapiens OX=9606 GN=KIF1B0	unknown	NUCLEUS	0.957566	NUCLEUS
Q12986	0.0405878	0.0874738	0.0411127	0.0864241	0.0945591	0.0745276	0.0813506	0.250962	0.222533	0.0204689	0.0372747	0.0369691	0.0598839	0.0556065	0.0727162	0.055912	0.14146	0.316224	0.208983	0.014971	0.0224944	0.0265033	0.0512249	0.081069	0.108686	0.132517	0.145657	0.256347	0.165702	0.00979955	Q12986	Transcriptional repressor NF-X1 OS=Homo sapiens OX=9606 GN=NFX1 PE=1 SV=20	unknown	NUCLEUS	0.782423	unknown
Q9HCE5	0.0434846	0.106815	0.0649351	0.0999562	0.110025	0.0974756	0.0767547	0.131913	0.114402	0.154239	0.0535621	0.0693587	0.0619312	0.0664295	0.105973	0.0927921	0.0911183	0.142902	0.105869	0.210064	0.10076	0.0627376	0.0313688	0.102662	0.095057	0.0998099	0.0684411	0.088403	0.0865019	0.264259	Q9HCE5	N6-adenosine-methyltransferase non-catalytic subunit OS=Homo sapiens OX=9606 GN=METTL14 PE=1 SV=20	unknown	CYTOSOL	0.622991	unknown
O00159	0.18135	0.281781	0.0981571	0.176125	0.118278	0.0572848	0.0324122	0.0229708	0.0196003	0.0120404	0.195828	0.225304	0.152083	0.143035	0.1116	0.0648516	0.0532956	0.0264814	0.0159779	0.0115435	0.273198	0.233097	0.150287	0.099074	0.0814082	0.0563782	0.0382933	0.0268779	0.0178654	0.0235212	O00159	Unconventional myosin-Ic OS=Homo sapiens OX=9606 GN=MYO1C PE=1 SV=40	unknown	PM	0.293026	unknown
Q9Y6R9	0.0449521	0.139646	0.066507	0.165807	0.168386	0.13154	0.106301	0.0759027	0.0536109	0.0473471	0.0453456	0.0653602	0.0832899	0.1204	0.191702	0.177421	0.217137	0.0742208	0.0183467	0.00677577	0.0351389	0.0511227	0.0724344	0.101357	0.171762	0.209692	0.169098	0.124826	0.0457947	0.0187746	Q9Y6R9	Coiled-coil domain-containing protein 61 OS=Homo sapiens OX=9606 GN=CCDC61 PE=1 SV=30	unknown	NUCLEUS	0.292764	unknown
P05388	0.0310434	0.11904	0.0671728	0.132895	0.120433	0.0938938	0.0916091	0.184734	0.1526	0.00657878	0.0342926	0.0590145	0.0709296	0.0835426	0.103182	0.0845044	0.13887	0.274234	0.132886	0.0185439	0.0304813	0.043409	0.0585523	0.0719343	0.110467	0.124751	0.151545	0.237522	0.152371	0.0189667	P05388	60S acidic ribosomal protein P0 OS=Homo sapiens OX=9606 GN=RPLP0 PE=1 SV=10	RIBOSOME	RIBOSOME	1	RIBOSOME
A0A0A0MRJ3	0.0441133	0.122802	0.0459016	0.0941878	0.108197	0.0697466	0.0780924	0.222057	0.194337	0.0205663	0.0491907	0.059771	0.063561	0.0696407	0.0886696	0.0790367	0.122937	0.255823	0.174891	0.0364785	0.0484692	0.0483829	0.050194	0.0703752	0.0973696	0.134627	0.144631	0.210694	0.158172	0.037085	A0A0A0MRJ3	Neuron navigator 1 OS=Homo sapiens OX=9606 GN=NAV1 PE=1 SV=10	unknown	NUCLEUS	0.720272	unknown
A0A0A0MT01	0.0304184	0.118745	0.0637656	0.107551	0.113652	0.0832682	0.0561176	0.0334689	0.054249	0.338765	0.0421177	0.068982	0.0952747	0.0802856	0.125031	0.113343	0.0933978	0.0618842	0.0494971	0.270187	0.0394713	0.0575421	0.0756016	0.0782992	0.0951284	0.129216	0.062531	0.079981	0.0504312	0.331798	A0A0A0MT01	Gelsolin OS=Homo sapiens OX=9606 GN=GSN PE=1 SV=10	unknown	CYTOSOL	0.929314	CYTOSOL
O00267-2	0.0591133	0.129836	0.066468	0.0906852	0.0977299	0.0857074	0.061783	0.0841228	0.103552	0.221003	0.0644349	0.065176	0.0810342	0.0696985	0.107866	0.105777	0.0947617	0.10059	0.0918309	0.218831	0.0689139	0.0661477	0.0589903	0.0690575	0.0939612	0.124118	0.0498073	0.0783161	0.0725569	0.318132	O00267-2	Isoform 2 of Transcription elongation factor SPT5 OS=Homo sapiens OX=9606 GN=SUPT5H0	unknown	CYTOSOL	0.879083	CYTOSOL
P06865	0.0538256	0.266916	0.236773	0.238826	0.110843	0.0457842	0.0212174	0.0075833	0.00671438	0.0115171	0.0607495	0.274389	0.290844	0.185439	0.0975183	0.0413359	0.0269012	0.00905711	0.0038467	0.00991908	0.0870105	0.245288	0.281031	0.181783	0.0965576	0.0492749	0.0239712	0.0108019	0.00654584	0.0177359	P06865	Beta-hexosaminidase subunit alpha OS=Homo sapiens OX=9606 GN=HEXA PE=1 SV=20	unknown	LYSOSOME	0.771993	LYSOSOME
Q9BZE9	0.0281121	0.126329	0.0671176	0.106387	0.11649	0.0773083	0.056312	0.05517	0.0914522	0.275323	0.0805549	0.119007	0.085909	0.0649793	0.121684	0.102945	0.0963738	0.0705768	0.062789	0.195181	0.0496702	0.0651921	0.0539387	0.0714009	0.106713	0.102057	0.0523865	0.0659682	0.102445	0.330229	Q9BZE9	Tether containing UBX domain for GLUT4 OS=Homo sapiens OX=9606 GN=ASPSCR1 PE=1 SV=10	unknown	CYTOSOL	0.869798	CYTOSOL
O15226	0.159658	0.143863	0.0322305	0.0548559	0.0734258	0.07492	0.0759872	0.247385	0.13127	0.00640342	0.190062	0.0568251	0.0338597	0.0444503	0.0611904	0.0710978	0.132212	0.243547	0.148117	0.018638	0.140722	0.0753697	0.0263953	0.0411433	0.0671013	0.0868183	0.0922643	0.256957	0.190531	0.0226984	O15226	NF-kappa-B-repressing factor OS=Homo sapiens OX=9606 GN=NKRF PE=1 SV=20	NUCLEUS	NUCLEUS	1	NUCLEUS
Q9P0N9	0.119264	0.170745	0.0754002	0.123901	0.109439	0.0740754	0.0746642	0.125667	0.113082	0.0137626	0.041889	0.0568024	0.0642591	0.0577528	0.0805614	0.0796842	0.124132	0.290445	0.179253	0.0252211	0.0424871	0.0502474	0.0521874	0.0611117	0.0880784	0.110728	0.118343	0.248957	0.184935	0.0429237	Q9P0N9	TBC1 domain family member 7 OS=Homo sapiens OX=9606 GN=TBC1D7 PE=1 SV=10	unknown	NUCLEUS	0.857336	unknown
P20248	0.0436978	0.11705	0.0544336	0.103818	0.102658	0.0961583	0.080954	0.210306	0.15065	0.0402739	0.0680593	0.0572053	0.0718138	0.0784354	0.114547	0.0951601	0.121442	0.19387	0.151137	0.0483309	0.058708	0.0561748	0.048765	0.0744142	0.101393	0.126029	0.0989867	0.20418	0.154465	0.0768841	P20248	Cyclin-A2 OS=Homo sapiens OX=9606 GN=CCNA2 PE=1 SV=20	unknown	NUCLEUS	0.895538	NUCLEUS
Q8WUI4	0.015015	0.0925926	0.047047	0.102603	0.0965966	0.0900901	0.0920921	0.174174	0.161161	0.128629	0.0344828	0.0357922	0.0523789	0.0674378	0.111523	0.0964644	0.109123	0.117634	0.100611	0.274553	0.0340071	0.0523187	0.0596908	0.0689655	0.104162	0.116528	0.0449465	0.0787158	0.0634958	0.37717	Q8WUI4	Histone deacetylase 7 OS=Homo sapiens OX=9606 GN=HDAC7 PE=1 SV=20	unknown	CYTOSOL	0.610056	unknown
P34059	0.0388585	0.35814	0.195897	0.247983	0.0829213	0.0323098	0.0130974	0.0100182	0.00915084	0.0116229	0.0564311	0.28164	0.278791	0.167687	0.0834647	0.0415808	0.0351861	0.0231543	0.0169414	0.015123	0.0847528	0.256344	0.259327	0.164598	0.0852019	0.0509415	0.0266256	0.0223591	0.0173227	0.0325281	P34059	N-acetylgalactosamine-6-sulfatase OS=Homo sapiens OX=9606 GN=GALNS PE=1 SV=10	LYSOSOME	LYSOSOME	1	LYSOSOME
B8ZWD1	0.0207726	0.0854769	0.0636436	0.0791302	0.124688	0.0577212	0.087068	0.0372492	0.0488465	0.395404	0.062176	0.0914871	0.130732	0.105344	0.157771	0.116929	0.105996	0.0839664	0.0660885	0.0795105	0.0490941	0.0745612	0.098596	0.0948219	0.135594	0.160215	0.0804993	0.110901	0.0565063	0.139212	B8ZWD1	Acyl-CoA-binding protein OS=Homo sapiens OX=9606 GN=DBI PE=1 SV=10	unknown	CYTOSOL	0.811589	unknown
Q14651	0.145169	0.163832	0.116835	0.126618	0.126279	0.089103	0.05441	0.0316451	0.0338275	0.112282	0.121259	0.133161	0.128998	0.13212	0.132352	0.10297	0.0717393	0.0282861	0.0289282	0.120186	0.0975483	0.112982	0.094535	0.107884	0.113965	0.124884	0.0442704	0.0596285	0.0418188	0.202484	Q14651	Plastin-1 OS=Homo sapiens OX=9606 GN=PLS1 PE=1 SV=20	unknown	CYTOSOL	0.260069	unknown
F8W7U0	0.176946	0.316355	0.0828258	0.107629	0.0838224	0.068431	0.0404163	0.0304507	0.0430739	0.0500498	0.201718	0.223711	0.110309	0.0835052	0.0790378	0.0697595	0.066323	0.056701	0.0408935	0.0680412	0.255874	0.22857	0.125899	0.0781032	0.0851304	0.0683403	0.0400172	0.0410364	0.0290741	0.0479562	F8W7U0	Intersectin-1 OS=Homo sapiens OX=9606 GN=ITSN1 PE=1 SV=10	unknown	NUCLEUS-CHROMATIN	0.354721	unknown
Q9Y333	0.0451066	0.0587711	0.0494025	0.0628613	0.08658	0.060919	0.0909673	0.228298	0.194205	0.122889	0.0549468	0.0528704	0.0631827	0.0602687	0.0764265	0.0840691	0.129297	0.21977	0.149607	0.109562	0.0583662	0.0553509	0.0571275	0.0664341	0.0785279	0.0980213	0.0863676	0.207908	0.158474	0.133422	Q9Y333	U6 snRNA-associated Sm-like protein LSm2 OS=Homo sapiens OX=9606 GN=LSM2 PE=1 SV=10	unknown	NUCLEUS	0.950658	NUCLEUS
O75347	0.0216995	0.136064	0.0745943	0.106899	0.11726	0.1006	0.0531581	0.0294654	0.0450349	0.315225	0.0551461	0.0865905	0.12168	0.1027	0.152279	0.129997	0.11736	0.0574518	0.0447552	0.132041	0.0408672	0.0657479	0.0773927	0.0841113	0.124557	0.157843	0.0654124	0.0912132	0.0596715	0.233184	O75347	Tubulin-specific chaperone A OS=Homo sapiens OX=9606 GN=TBCA PE=1 SV=30	unknown	CYTOSOL	0.894819	CYTOSOL
H7C173	0.0351438	0.122204	0.057508	0.115415	0.086262	0.0790735	0.105831	0.229633	0.148562	0.0203674	0.0645945	0.0699369	0.0636231	0.101991	0.0937348	0.0752793	0.136474	0.235551	0.126761	0.0320544	0.0475887	0.0507719	0.0560242	0.0666879	0.112208	0.12685	0.156613	0.220436	0.127169	0.0356518	H7C173	Mitotic-spindle organizing protein 2B (Fragment) OS=Homo sapiens OX=9606 GN=MZT2B PE=1 SV=10	unknown	RIBOSOME	0.740878	RIBOSOME
P14625	0.0428486	0.188126	0.14818	0.292846	0.179358	0.0778354	0.0269115	0.00750137	0.00878645	0.0276063	0.0483828	0.124622	0.175407	0.220358	0.199296	0.103085	0.0688765	0.0124548	0.00769693	0.0398202	0.0574281	0.117491	0.164287	0.187077	0.189226	0.138665	0.0627721	0.0179824	0.00982622	0.0552451	P14625	Endoplasmin OS=Homo sapiens OX=9606 GN=HSP90B1 PE=1 SV=10	ER	ER	1	ER
J3QRU1	0.148431	0.205089	0.102403	0.162963	0.146056	0.0943738	0.0677976	0.0353407	0.0202431	0.0173028	0.149271	0.16597	0.134559	0.137796	0.127223	0.0956274	0.111753	0.0409802	0.0148144	0.0220064	0.214078	0.200204	0.133634	0.102589	0.10208	0.0842198	0.0629439	0.0439603	0.018579	0.0377124	J3QRU1	Tyrosine-protein kinase OS=Homo sapiens OX=9606 GN=YES1 PE=1 SV=10	unknown	PM	0.855373	PM
Q12959	0.182207	0.269444	0.093922	0.135367	0.0973084	0.0747837	0.0434982	0.0450275	0.0362667	0.0221751	0.197581	0.201171	0.127487	0.119501	0.103666	0.0713112	0.0725281	0.0479008	0.0336477	0.0252054	0.246348	0.228002	0.115407	0.0862971	0.0788933	0.0686881	0.0447178	0.0591674	0.0328696	0.0396099	Q12959	Disks large homolog 1 OS=Homo sapiens OX=9606 GN=DLG1 PE=1 SV=20	unknown	PM	0.361736	unknown
Q96AE4	0.125726	0.0838058	0.048285	0.0841936	0.103277	0.114479	0.184311	0.179383	0.0704256	0.00611405	0.190703	0.0605244	0.0483703	0.0774236	0.113296	0.098306	0.188547	0.160978	0.0549268	0.00692526	0.150321	0.082573	0.0383612	0.0612797	0.102836	0.122472	0.138232	0.241044	0.0591709	0.00371008	Q96AE4	Far upstream element-binding protein 1 OS=Homo sapiens OX=9606 GN=FUBP1 PE=1 SV=30	unknown	NUCLEUS	0.697218	unknown
Q14683	0.229093	0.189753	0.0235684	0.0588662	0.0617301	0.0467258	0.0488771	0.178312	0.155236	0.00783787	0.317582	0.0860346	0.0295492	0.0449627	0.0574063	0.0506032	0.0866447	0.183028	0.132045	0.0121443	0.278129	0.131162	0.0324118	0.0419893	0.0656611	0.0758444	0.0764413	0.163538	0.121968	0.012856	Q14683	Structural maintenance of chromosomes protein 1A OS=Homo sapiens OX=9606 GN=SMC1A PE=1 SV=20	NUCLEUS-CHROMATIN	NUCLEUS-CHROMATIN	1	NUCLEUS-CHROMATIN
F8WCT1	0.0242496	0.105438	0.0588101	0.0991751	0.10792	0.091843	0.105705	0.148056	0.20152	0.0572825	0.0392897	0.0624118	0.0868171	0.0746016	0.116868	0.105217	0.128904	0.161316	0.156183	0.0683912	0.0333984	0.0335407	0.0559011	0.0531366	0.12963	0.117006	0.129833	0.202017	0.155913	0.0896248	F8WCT1	ADP-ribosylation factor-like protein 6-interacting protein 4 OS=Homo sapiens OX=9606 GN=ARL6IP4 PE=1 SV=10	unknown	RIBOSOME	0.623394	unknown
Q9NQC8	0.0442229	0.0655174	0.0548138	0.0714889	0.0839953	0.0805025	0.10067	0.212495	0.193736	0.0925582	0.0496241	0.0526316	0.0691729	0.0263158	0.093985	0.0932331	0.0894737	0.23985	0.16015	0.125564	0.0396107	0.0459484	0.0451185	0.0590765	0.0800513	0.101479	0.0837483	0.196469	0.162517	0.185982	Q9NQC8	Intraflagellar transport protein 46 homolog OS=Homo sapiens OX=9606 GN=IFT46 PE=1 SV=10	unknown	NUCLEUS	0.900021	NUCLEUS
X6RLT1	0.0368205	0.0612308	0.0427692	0.0732308	0.0895385	0.0844103	0.104359	0.248718	0.203179	0.0557436	0.0403687	0.0501358	0.0555361	0.0589029	0.0809874	0.0886711	0.13689	0.256429	0.175209	0.0568695	0.0344873	0.0402478	0.0479158	0.0591535	0.0863505	0.112603	0.107202	0.211627	0.163409	0.137005	X6RLT1	Negative elongation factor C/D (Fragment) OS=Homo sapiens OX=9606 GN=NELFCD PE=1 SV=10	unknown	NUCLEUS	0.947731	NUCLEUS
Q9BVP2	0.106327	0.0930972	0.0374212	0.0649148	0.0758758	0.0644691	0.0935024	0.247827	0.205037	0.0115283	0.124465	0.0530433	0.0491898	0.0527304	0.0719156	0.0700382	0.122851	0.249572	0.181543	0.0246525	0.0853513	0.0536721	0.0340285	0.0430461	0.0636114	0.0764602	0.0999349	0.296371	0.224772	0.0227519	Q9BVP2	Guanine nucleotide-binding protein-like 3 OS=Homo sapiens OX=9606 GN=GNL3 PE=1 SV=20	unknown	NUCLEUS	0.969381	NUCLEUS
M9T4I7	0.0330626	0.100338	0.0533314	0.100985	0.121541	0.0984691	0.116007	0.181701	0.149932	0.0446345	0.0409106	0.0527879	0.0554273	0.0762125	0.121412	0.12999	0.202573	0.17486	0.104916	0.0409106	0.021978	0.0523286	0.0319205	0.0418629	0.102564	0.114076	0.106227	0.192046	0.0905285	0.246468	M9T4I7	MEX3C variant 2 OS=Homo sapiens OX=9606 GN=MEX3C PE=1 SV=10	unknown	NUCLEUS	0.711758	unknown
Q86YP4	0.27513	0.229825	0.023596	0.0755073	0.0684285	0.0368098	0.0467202	0.110901	0.0707881	0.0622935	0.426594	0.0871099	0.0233379	0.034464	0.0691995	0.0445047	0.0504749	0.10882	0.0871099	0.0683853	0.411156	0.17259	0.0196621	0.0318963	0.045587	0.0444218	0.0317507	0.0844742	0.0841829	0.0742791	Q86YP4	Transcriptional repressor p66-alpha OS=Homo sapiens OX=9606 GN=GATAD2A PE=1 SV=10	unknown	NUCLEUS-CHROMATIN	0.836274	NUCLEUS-CHROMATIN
Q9Y606	0.186039	0.491806	0.0605463	0.0223065	0.0484067	0.045827	0.0174507	0.0197269	0.0194234	0.0884674	0.19024	0.332093	0.10091	0.0370554	0.0593052	0.0593879	0.0566584	0.0320926	0.0332506	0.0990074	0.126675	0.159406	0.0768552	0.0444444	0.0738869	0.086803	0.0648215	0.0868833	0.077497	0.202728	Q9Y606	tRNA pseudouridine synthase A OS=Homo sapiens OX=9606 GN=PUS1 PE=1 SV=30	unknown	NUCLEUS-CHROMATIN	0.408491	unknown
A0A0A0MR51	0.0541698	0.179138	0.131519	0.263416	0.188587	0.0924666	0.0362182	0.0190224	0.0175107	0.0179516	0.0589722	0.117116	0.159864	0.203971	0.212572	0.125589	0.0929921	0.0165003	0.00579741	0.00662561	0.0686484	0.101064	0.149352	0.167645	0.188897	0.149957	0.0969114	0.0396288	0.0179397	0.0199573	A0A0A0MR51	Fatty acid desaturase 1 OS=Homo sapiens OX=9606 GN=FADS1 PE=1 SV=10	unknown	ER	0.946304	ER
P40763	0.0496605	0.117198	0.0805136	0.0799661	0.105891	0.106275	0.0757227	0.0734779	0.0939006	0.217395	0.0635115	0.0745665	0.0817668	0.0742609	0.0979673	0.110466	0.0941974	0.102943	0.0752798	0.225041	0.0529825	0.061148	0.0665513	0.0652307	0.0857839	0.112289	0.0566375	0.0906013	0.082222	0.326554	P40763	Signal transducer and activator of transcription 3 OS=Homo sapiens OX=9606 GN=STAT3 PE=1 SV=20	unknown	CYTOSOL	0.900721	CYTOSOL
Q9Y394	0.0447181	0.16328	0.142618	0.240212	0.199116	0.114102	0.0516946	0.0230262	0.0142579	0.00697648	0.0602372	0.115741	0.142036	0.208177	0.207241	0.131684	0.101176	0.0188566	0.0079588	0.00689243	0.0637884	0.100283	0.135362	0.169026	0.203574	0.16009	0.0928072	0.0370698	0.0155711	0.0224277	Q9Y394	Dehydrogenase/reductase SDR family member 7 OS=Homo sapiens OX=9606 GN=DHRS7 PE=1 SV=10	unknown	ER	0.922883	ER
E9PN10	0.0452147	0.207331	0.123288	0.217651	0.169521	0.10385	0.0662718	0.0491022	0.0145779	0.00319326	0.0543947	0.139328	0.145588	0.162677	0.16826	0.11708	0.125201	0.0610777	0.0190339	0.00735978	0.0608305	0.116274	0.151515	0.158025	0.157351	0.137149	0.116723	0.0713805	0.0170595	0.0136925	E9PN10	Receptor-binding cancer antigen-expressed on SiSo cells (Fragment) OS=Homo sapiens OX=9606 GN=EBAG9 PE=1 SV=10	unknown	ER	0.526872	unknown
Q15424	0.219736	0.152985	0.0256467	0.0487096	0.0688218	0.078687	0.0983881	0.187689	0.101677	0.0176605	0.28	0.0705303	0.0329195	0.045783	0.0663001	0.0655394	0.144219	0.186994	0.0836359	0.0240787	0.24395	0.110508	0.0223693	0.0335376	0.0551449	0.0670208	0.0740418	0.262575	0.112282	0.0185703	Q15424	Scaffold attachment factor B1 OS=Homo sapiens OX=9606 GN=SAFB PE=1 SV=40	unknown	NUCLEUS	0.862498	NUCLEUS
Q14331	0.0336737	0.100419	0.0550711	0.103775	0.109196	0.0957435	0.101796	0.200379	0.170262	0.0296868	0.0436447	0.0579601	0.0655879	0.0642852	0.0836903	0.0978312	0.139555	0.221352	0.178688	0.0474048	0.0493808	0.0514449	0.0526622	0.0676934	0.101593	0.12107	0.12369	0.20697	0.163914	0.0615804	Q14331	Protein FRG1 OS=Homo sapiens OX=9606 GN=FRG1 PE=1 SV=10	unknown	NUCLEUS	0.508805	unknown
Q8WZ82	0.0754322	0.232059	0.0639078	0.0969094	0.100052	0.0550026	0.0350969	0.072813	0.0764798	0.192247	0.0883112	0.136431	0.081674	0.0516224	0.0833333	0.0728245	0.0774336	0.0875737	0.0733776	0.247419	0.0700921	0.0918416	0.0523317	0.0541362	0.0719916	0.0937411	0.0677177	0.109792	0.0964954	0.291861	Q8WZ82	Esterase OVCA2 OS=Homo sapiens OX=9606 GN=OVCA2 PE=1 SV=10.001	unknown	CYTOSOL	0.502482	unknown
P13984	0.0686341	0.140872	0.0552954	0.0938636	0.0908139	0.0805865	0.0624422	0.120449	0.146448	0.140595	0.0872469	0.0736791	0.0684687	0.0630486	0.0910235	0.090534	0.0891352	0.142253	0.142008	0.152603	0.0649102	0.0561004	0.0519116	0.0583444	0.0812334	0.102676	0.0698471	0.141872	0.134558	0.238547	P13984	General transcription factor IIF subunit 2 OS=Homo sapiens OX=9606 GN=GTF2F2 PE=1 SV=20	unknown	NUCLEUS	0.471234	unknown
Q96T76	0.0306995	0.104134	0.0884354	0.111634	0.119658	0.111111	0.0549451	0.0692482	0.0908774	0.219257	0.0362603	0.0539482	0.0817435	0.0722678	0.0898294	0.0862919	0.0865445	0.07012	0.0590019	0.363992	0.0355442	0.0510536	0.0539763	0.06892	0.0854193	0.114034	0.0480837	0.0733512	0.0830623	0.386555	Q96T76	MMS19 nucleotide excision repair protein homolog OS=Homo sapiens OX=9606 GN=MMS19 PE=1 SV=20	unknown	CYTOSOL	0.871849	CYTOSOL
Q9NSK0	0.0377934	0.108474	0.059276	0.0855324	0.102772	0.085665	0.0778411	0.122	0.150245	0.170402	0.0514549	0.0647118	0.0763959	0.0624649	0.0933603	0.101899	0.107404	0.162117	0.121672	0.158522	0.0398295	0.0479659	0.0565672	0.0621465	0.0879504	0.106703	0.0649361	0.100891	0.0924448	0.340566	Q9NSK0	Kinesin light chain 4 OS=Homo sapiens OX=9606 GN=KLC4 PE=1 SV=30	unknown	CYTOSOL	0.606597	unknown
P47895	0.0400568	0.109892	0.069465	0.0929447	0.106463	0.0882397	0.0634082	0.0456379	0.0706809	0.313212	0.0551286	0.0907681	0.0948761	0.0708547	0.106962	0.0978461	0.0927547	0.063416	0.0595776	0.267816	0.0503597	0.0677434	0.065142	0.0636019	0.0781768	0.106612	0.0511018	0.0751166	0.0649665	0.377179	P47895	Aldehyde dehydrogenase family 1 member A3 OS=Homo sapiens OX=9606 GN=ALDH1A3 PE=1 SV=20	unknown	CYTOSOL	0.923935	CYTOSOL
Q02952	0.0381894	0.092501	0.082611	0.100113	0.121338	0.0978349	0.0810831	0.0365133	0.0558951	0.293922	0.0395638	0.0713473	0.0944508	0.0828786	0.125142	0.116466	0.0881472	0.0480435	0.0406601	0.2933	0.0424571	0.064466	0.0762966	0.0776083	0.093619	0.120041	0.051357	0.0620916	0.0462346	0.365829	Q02952	A-kinase anchor protein 12 OS=Homo sapiens OX=9606 GN=AKAP12 PE=1 SV=40	unknown	CYTOSOL	0.927083	CYTOSOL
P30050	0.0320555	0.106338	0.0731779	0.119322	0.112477	0.126193	0.096526	0.206216	0.124703	0.00299236	0.0448966	0.0664257	0.0800263	0.105817	0.126354	0.0945775	0.173027	0.178573	0.124401	0.00590195	0.0334205	0.0477381	0.0580155	0.0830019	0.113645	0.132861	0.158491	0.220572	0.140904	0.0113506	P30050	60S ribosomal protein L12 OS=Homo sapiens OX=9606 GN=RPL12 PE=1 SV=10	unknown	RIBOSOME	0.883582	RIBOSOME
cRAPR1	0.0604171	0.203079	0.143637	0.167998	0.137205	0.0912103	0.0736698	0.0362502	0.034886	0.0516469	0.117988	0.196804	0.162332	0.159981	0.127703	0.0747415	0.0910373	0.0354121	0.0144155	0.0195863	0.103641	0.133165	0.143376	0.115512	0.12234	0.123447	0.0589248	0.0613237	0.0370279	0.101242	cRAPR1	Alpha-2-HS-glycoprotein OS=Bos taurus OX=9913 GN=AHSG PE=1 SV=20	unknown	GOLGI	0.389264	unknown
Q9UBU9	0.0497818	0.0966977	0.0412715	0.0806663	0.0800698	0.0614344	0.0623654	0.257827	0.242901	0.0269857	0.0526164	0.0547701	0.057361	0.060922	0.0796976	0.0724902	0.118667	0.266718	0.191552	0.0452064	0.0665152	0.0526573	0.0463058	0.0614566	0.0935531	0.108327	0.100833	0.229483	0.183152	0.057716	Q9UBU9	Nuclear RNA export factor 1 OS=Homo sapiens OX=9606 GN=NXF1 PE=1 SV=10	unknown	NUCLEUS	0.961558	NUCLEUS
Q14192	0.0517461	0.112541	0.0695087	0.110731	0.121255	0.111335	0.137878	0.121389	0.0902876	0.0733293	0.062621	0.0689008	0.0946652	0.0921416	0.147485	0.12847	0.160514	0.108398	0.0906743	0.0461295	0.0666424	0.0702073	0.0606039	0.0906511	0.121208	0.162314	0.0888323	0.128265	0.0923245	0.118952	Q14192	Four and a half LIM domains protein 2 OS=Homo sapiens OX=9606 GN=FHL2 PE=1 SV=30	unknown	NUCLEUS	0.498846	unknown
Q92845	0.0556845	0.102088	0.0456303	0.0862336	0.104795	0.0866203	0.0715391	0.16744	0.1686	0.111369	0.0463432	0.0565466	0.0649069	0.0653018	0.0897242	0.102495	0.119281	0.182608	0.133039	0.139754	0.0422185	0.0504967	0.0518764	0.0642016	0.0933591	0.113135	0.0744113	0.136497	0.128311	0.245493	Q92845	Kinesin-associated protein 3 OS=Homo sapiens OX=9606 GN=KIFAP3 PE=1 SV=20	unknown	NUCLEUS	0.720718	unknown
Q08209-2	0.0595693	0.11928	0.0812437	0.104501	0.117148	0.0950821	0.0681733	0.0533162	0.0688628	0.232823	0.0699807	0.0888212	0.104533	0.0874725	0.132679	0.12162	0.102456	0.0609718	0.0526777	0.178789	0.0774456	0.0975606	0.0881144	0.0917123	0.110966	0.133304	0.0521629	0.0757647	0.0591365	0.213833	Q08209-2	Isoform 2 of Serine/threonine-protein phosphatase 2B catalytic subunit alpha isoform OS=Homo sapiens OX=9606 GN=PPP3CA0	unknown	CYTOSOL	0.881964	CYTOSOL
Q9P035	0.0538985	0.179236	0.148802	0.263023	0.201288	0.0932479	0.0437536	0.00807946	0.00341706	0.00525469	0.061536	0.121839	0.169617	0.211779	0.197385	0.126033	0.0944322	0.0115282	0.00406	0.00179048	0.0690193	0.117066	0.149682	0.195786	0.206368	0.154129	0.080779	0.0194226	0.00389514	0.00385269	Q9P035	Very-long-chain (3R)-3-hydroxyacyl-CoA dehydratase 3 OS=Homo sapiens OX=9606 GN=HACD3 PE=1 SV=20	ER	ER	1	ER
Q9NVQ4	0.0385982	0.0815568	0.060239	0.0794574	0.120801	0.0773579	0.067991	0.0429587	0.0776809	0.353359	0.0401451	0.0723096	0.0911729	0.0645707	0.10786	0.125272	0.079081	0.0631197	0.0486094	0.30786	0.0560606	0.0644781	0.0658249	0.0734007	0.0835017	0.123906	0.0579125	0.0718855	0.0552189	0.347811	Q9NVQ4	Fas apoptotic inhibitory molecule 1 OS=Homo sapiens OX=9606 GN=FAIM PE=1 SV=10	unknown	CYTOSOL	0.912531	CYTOSOL
P20290-2	0.0240133	0.1163	0.0679534	0.109604	0.135933	0.137225	0.147448	0.129198	0.0798536	0.0524725	0.037635	0.0601544	0.0761462	0.0882194	0.127029	0.123409	0.177373	0.188791	0.0867175	0.0345253	0.0311621	0.0397586	0.0605115	0.0726867	0.123639	0.153998	0.184861	0.197223	0.0755833	0.0605769	P20290-2	Isoform 2 of Transcription factor BTF3 OS=Homo sapiens OX=9606 GN=BTF30	unknown	RIBOSOME	0.491726	unknown
Q13126	0.0232413	0.118204	0.06807	0.107786	0.116464	0.0938889	0.0624208	0.0271722	0.0447428	0.338009	0.0453254	0.0785156	0.0974579	0.0825529	0.124592	0.115884	0.106166	0.0889843	0.0621552	0.198366	0.0404658	0.0605249	0.0788632	0.0797671	0.0986616	0.139631	0.0648531	0.093725	0.0605597	0.282948	Q13126	S-methyl-5'-thioadenosine phosphorylase OS=Homo sapiens OX=9606 GN=MTAP PE=1 SV=20	unknown	CYTOSOL	0.934079	CYTOSOL
Q9H4Z3	0.0399255	0.0653447	0.0327389	0.0841097	0.0802502	0.081448	0.0779878	0.225047	0.256987	0.0561618	0.0417448	0.0469043	0.0625235	0.0601313	0.0930582	0.0763133	0.113602	0.254409	0.173077	0.0782364	0.0448537	0.0455038	0.0430119	0.0546046	0.0862405	0.10325	0.110401	0.19545	0.18429	0.132394	Q9H4Z3	Phosphorylated CTD-interacting factor 1 OS=Homo sapiens OX=9606 GN=PCIF1 PE=1 SV=10	unknown	NUCLEUS	0.952684	NUCLEUS
Q01085	0.0758806	0.106193	0.0568165	0.115387	0.120798	0.0969988	0.148555	0.174708	0.081968	0.0226965	0.0786582	0.0602654	0.0595815	0.0745789	0.110177	0.1159	0.200545	0.20376	0.0774584	0.0190766	0.0860379	0.0599465	0.0582283	0.0637224	0.0901744	0.111663	0.158988	0.258602	0.0857622	0.0268762	Q01085	Nucleolysin TIAR OS=Homo sapiens OX=9606 GN=TIAL1 PE=1 SV=10	unknown	NUCLEUS	0.424728	unknown
Q99567	0.0800359	0.10508	0.0580301	0.0929264	0.0968856	0.0741892	0.0774808	0.200285	0.178026	0.0370601	0.0882824	0.0672759	0.0638958	0.0667752	0.0988983	0.104281	0.123836	0.199424	0.129419	0.0579119	0.0921297	0.0674094	0.0618239	0.0677469	0.0946155	0.111725	0.0808053	0.162301	0.154767	0.106676	Q99567	Nuclear pore complex protein Nup88 OS=Homo sapiens OX=9606 GN=NUP88 PE=1 SV=20	unknown	NUCLEUS	0.959818	NUCLEUS
Q9UNS1	0.0624184	0.0912543	0.0529251	0.0889996	0.104308	0.0986116	0.0568411	0.0473478	0.0986116	0.298683	0.067079	0.0713606	0.0691405	0.0694577	0.0846813	0.110054	0.0824611	0.0683476	0.0437678	0.33365	0.065528	0.0643374	0.0555454	0.0617273	0.0821504	0.122356	0.0542632	0.07519	0.0565986	0.362304	Q9UNS1	Protein timeless homolog OS=Homo sapiens OX=9606 GN=TIMELESS PE=1 SV=20	unknown	CYTOSOL	0.904896	CYTOSOL
P16144-2	0.065689	0.194749	0.127182	0.247598	0.180272	0.103416	0.0470394	0.0173313	0.00858436	0.00813889	0.0722366	0.125587	0.145442	0.182506	0.202945	0.121068	0.102323	0.024008	0.00805189	0.015832	0.0920273	0.124504	0.141228	0.162261	0.179062	0.15005	0.0888691	0.0329879	0.00926986	0.0197416	P16144-2	Isoform Beta-4A of Integrin beta-4 OS=Homo sapiens OX=9606 GN=ITGB40	unknown	ER	0.902321	ER
Q14554	0.0477963	0.260946	0.135034	0.267586	0.171629	0.0636311	0.0237522	0.0136821	0.0111646	0.00477963	0.0650824	0.150598	0.173529	0.216799	0.187707	0.102928	0.0630129	0.0178644	0.0105854	0.0118937	0.0732691	0.128497	0.158794	0.174133	0.183344	0.142466	0.0615841	0.0277471	0.0188026	0.031363	Q14554	Protein disulfide-isomerase A5 OS=Homo sapiens OX=9606 GN=PDIA5 PE=1 SV=10	ER	ER	1	ER
Q96HP0	0.0476711	0.132736	0.063525	0.134485	0.125082	0.0834244	0.0766455	0.176471	0.134922	0.0250383	0.0491864	0.0732249	0.0817308	0.0965237	0.120932	0.102071	0.14534	0.198225	0.127219	0.00554734	0.0709879	0.0754995	0.0743946	0.0909677	0.12439	0.137004	0.1173	0.163613	0.119418	0.0264248	Q96HP0	Dedicator of cytokinesis protein 6 OS=Homo sapiens OX=9606 GN=DOCK6 PE=1 SV=30	unknown	RIBOSOME	0.483041	unknown
P58107	0.0450987	0.104827	0.0708741	0.0892691	0.109014	0.0853255	0.0685106	0.0492267	0.0767205	0.301134	0.0376023	0.0598955	0.0755391	0.0615175	0.0990276	0.0887727	0.0769343	0.0611984	0.0484491	0.391064	0.0366913	0.0467261	0.057298	0.0559198	0.0741752	0.0999864	0.0506845	0.0700979	0.0593278	0.449093	P58107	Epiplakin OS=Homo sapiens OX=9606 GN=EPPK1 PE=1 SV=30	unknown	CYTOSOL	0.879132	CYTOSOL
H0Y547	0.0850286	0.16739	0.108876	0.174248	0.174552	0.12739	0.112457	0.036419	0.00426667	0.00937143	0.086972	0.127222	0.123951	0.141694	0.154245	0.122884	0.152468	0.0529441	0.0135471	0.024072	0.110299	0.14615	0.118294	0.131909	0.155018	0.146524	0.0944351	0.0619574	0.0194866	0.0159266	H0Y547	Phospholipid-transporting ATPase (Fragment) OS=Homo sapiens OX=9606 GN=ATP11A PE=1 SV=10	unknown	PM	0.628046	unknown
Q96C36	0.247966	0.571886	0.0646779	0.0213282	0.0189426	0.0135391	0.0121322	0.0222254	0.0190853	0.00821728	0.293494	0.459937	0.102059	0.0283124	0.0223814	0.0190242	0.018017	0.0278648	0.0179797	0.0109296	0.34612	0.39405	0.109577	0.0286787	0.0246422	0.0205493	0.0158354	0.0241906	0.0152144	0.0211421	Q96C36	Pyrroline-5-carboxylate reductase 2 OS=Homo sapiens OX=9606 GN=PYCR2 PE=1 SV=10	unknown	MITOCHONDRIA	0.957643	MITOCHONDRIA
Q8IZT6	0.0275709	0.0738962	0.0501453	0.0939516	0.109024	0.0898131	0.111668	0.25427	0.176401	0.0132595	0.0413154	0.0532436	0.0635575	0.0744993	0.0935725	0.0930942	0.161256	0.260628	0.144245	0.0145889	0.0311574	0.0397242	0.0462589	0.0750808	0.115804	0.154484	0.164646	0.221032	0.13314	0.018672	Q8IZT6	Abnormal spindle-like microcephaly-associated protein OS=Homo sapiens OX=9606 GN=ASPM PE=1 SV=20	unknown	RIBOSOME	0.856666	RIBOSOME
Q8IZH2	0.0265368	0.0905297	0.0443462	0.0750564	0.0774581	0.0640716	0.077445	0.277889	0.250656	0.0160113	0.0326828	0.0455143	0.0502401	0.0532377	0.0756584	0.0643716	0.120485	0.304775	0.2163	0.0367357	0.0386991	0.0507918	0.0589909	0.0697857	0.0933596	0.107511	0.122375	0.238634	0.18023	0.0396226	Q8IZH2	5'-3' exoribonuclease 1 OS=Homo sapiens OX=9606 GN=XRN1 PE=1 SV=10	unknown	NUCLEUS	0.930416	NUCLEUS
Q9BY44	0.0270921	0.109857	0.062775	0.12051	0.120612	0.100333	0.104182	0.159984	0.175761	0.0188925	0.0369016	0.0615791	0.0726374	0.0901361	0.119569	0.0961235	0.153859	0.175665	0.162051	0.0314794	0.0283652	0.0403714	0.051389	0.0728769	0.110713	0.135363	0.149134	0.217196	0.16975	0.0248415	Q9BY44	Eukaryotic translation initiation factor 2A OS=Homo sapiens OX=9606 GN=EIF2A PE=1 SV=30	unknown	RIBOSOME	0.931077	RIBOSOME
Q9BQA1	0.03683	0.0556196	0.0615562	0.0608069	0.0971182	0.0825937	0.0757349	0.114697	0.180058	0.234986	0.0383579	0.0621524	0.0853735	0.0648472	0.0915085	0.116622	0.087495	0.0864056	0.149303	0.217935	0.0429711	0.0564764	0.0561694	0.0554021	0.0821056	0.112646	0.0477287	0.129527	0.169736	0.247238	Q9BQA1	Methylosome protein 50 OS=Homo sapiens OX=9606 GN=WDR77 PE=1 SV=10	unknown	CYTOSOL	0.536165	unknown
Q86X55	0.0365337	0.0809227	0.0751247	0.076808	0.110848	0.0879676	0.0979426	0.0545511	0.0879676	0.291334	0.0327475	0.0621884	0.086191	0.0607617	0.0985615	0.115934	0.0832536	0.0702452	0.0578075	0.332309	0.0396187	0.0531107	0.0742945	0.0703856	0.0872317	0.118629	0.0586589	0.0741684	0.0711169	0.352785	Q86X55	Histone-arginine methyltransferase CARM1 OS=Homo sapiens OX=9606 GN=CARM1 PE=1 SV=30	unknown	CYTOSOL	0.916175	CYTOSOL
P28074	0.0194513	0.0623087	0.0386655	0.0568882	0.0671796	0.0508212	0.0418984	0.128971	0.346276	0.18754	0.027064	0.0431686	0.0601207	0.0474364	0.0728646	0.0731323	0.0721955	0.139588	0.273391	0.191039	0.0210048	0.0322018	0.0400481	0.0408177	0.0503252	0.06797	0.0361812	0.138305	0.323041	0.250106	P28074	Proteasome subunit beta type-5 OS=Homo sapiens OX=9606 GN=PSMB5 PE=1 SV=30	PROTEASOME	PROTEASOME	1	PROTEASOME
Q9NZI8	0.0317169	0.117553	0.0651252	0.131492	0.129051	0.109216	0.118453	0.177658	0.111531	0.00820513	0.0303538	0.0518582	0.0651949	0.0815031	0.113836	0.107124	0.206331	0.222013	0.1134	0.00838586	0.0286479	0.0443498	0.0520957	0.0727486	0.110925	0.135066	0.17736	0.263032	0.102424	0.0133509	Q9NZI8	Insulin-like growth factor 2 mRNA-binding protein 1 OS=Homo sapiens OX=9606 GN=IGF2BP1 PE=1 SV=20	unknown	RIBOSOME	0.809559	RIBOSOME
P98194	0.0586008	0.233362	0.135473	0.191896	0.149957	0.0876645	0.0602102	0.0513112	0.0224368	0.00908833	0.0593292	0.150381	0.148928	0.172539	0.154982	0.116721	0.101223	0.0278484	0.0249425	0.0431045	0.0678351	0.144124	0.164227	0.156186	0.139381	0.118351	0.0839175	0.0784536	0.0253608	0.0221649	P98194	Calcium-transporting ATPase type 2C member 1 OS=Homo sapiens OX=9606 GN=ATP2C1 PE=1 SV=30	unknown	GOLGI	0.408203	unknown
Q8TAQ2	0.271838	0.2207	0.021287	0.0499144	0.0682652	0.049425	0.04184	0.128211	0.119403	0.0291167	0.379126	0.101697	0.0497686	0.0544987	0.0619023	0.0442159	0.0664267	0.124833	0.0851414	0.0323907	0.363605	0.153385	0.0455375	0.0512731	0.0499696	0.0539672	0.0466672	0.1075	0.0855132	0.0425828	Q8TAQ2	SWI/SNF complex subunit SMARCC2 OS=Homo sapiens OX=9606 GN=SMARCC2 PE=1 SV=10	unknown	NUCLEUS-CHROMATIN	0.884795	NUCLEUS-CHROMATIN
O14641	0.0447141	0.0744171	0.0731396	0.0887895	0.0871926	0.0788885	0.102843	0.168636	0.162248	0.119131	0.041115	0.0714916	0.0742866	0.0808326	0.103707	0.107311	0.1015	0.119079	0.100324	0.200353	0.0405806	0.0615733	0.0699235	0.0662557	0.0859216	0.109256	0.0588419	0.108241	0.098486	0.300921	O14641	Segment polarity protein dishevelled homolog DVL-2 OS=Homo sapiens OX=9606 GN=DVL2 PE=1 SV=10	unknown	CYTOSOL	0.479797	unknown
Q2M2I8	0.0722089	0.128132	0.0562821	0.0978263	0.102066	0.0724332	0.082752	0.174252	0.179165	0.0348819	0.072617	0.088219	0.0752414	0.0745913	0.101606	0.087906	0.118725	0.211085	0.131149	0.0388607	0.120192	0.09145	0.0818895	0.0662781	0.0833821	0.0936889	0.100446	0.16624	0.133383	0.0630509	Q2M2I8	AP2-associated protein kinase 1 OS=Homo sapiens OX=9606 GN=AAK1 PE=1 SV=30	unknown	NUCLEUS	0.949949	NUCLEUS
J3QLG5	0.0461538	0.130769	0.0769231	0.163636	0.106294	0.0636364	0.0909091	0.158741	0.115385	0.0475524	0.0593343	0.0622287	0.0795948	0.0861071	0.120839	0.109986	0.0998553	0.178726	0.146889	0.0564399	0.0744849	0.044374	0.0562599	0.0562599	0.0974643	0.0649762	0.108558	0.202853	0.171157	0.123613	J3QLG5	Cytosolic endo-beta-N-acetylglucosaminidase OS=Homo sapiens OX=9606 GN=ENGASE PE=1 SV=10	unknown	NUCLEUS	0.830099	unknown
Q92503	0.0968074	0.158412	0.0852916	0.112255	0.0992416	0.0841681	0.0792997	0.104297	0.103361	0.0768655	0.0703586	0.0933025	0.0943754	0.0867412	0.101514	0.128915	0.102505	0.131061	0.105063	0.0861635	0.0812659	0.0804707	0.0796756	0.0741094	0.10194	0.129612	0.0723601	0.126272	0.123092	0.131202	Q92503	SEC14-like protein 1 OS=Homo sapiens OX=9606 GN=SEC14L1 PE=1 SV=20	unknown	NUCLEUS	0.542939	unknown
Q16576	0.180186	0.0993654	0.0524434	0.0586249	0.0877504	0.0708448	0.0709768	0.0759704	0.0843077	0.21953	0.159789	0.0698824	0.0606474	0.0513785	0.0874516	0.0805365	0.0735877	0.0914384	0.061492	0.263796	0.162232	0.0796445	0.0546702	0.0509941	0.0640967	0.0876039	0.0504629	0.0751589	0.0648809	0.310256	Q16576	Histone-binding protein RBBP7 OS=Homo sapiens OX=9606 GN=RBBP7 PE=1 SV=10	unknown	CYTOSOL	0.453548	unknown
Q9Y6M1	0.0298903	0.118866	0.0591606	0.131998	0.132712	0.120745	0.126061	0.165007	0.107086	0.00847298	0.0328079	0.053453	0.0654189	0.083558	0.115087	0.111544	0.204536	0.215544	0.103324	0.0147278	0.0351368	0.0444246	0.0549656	0.0659766	0.110603	0.129122	0.164583	0.263369	0.100453	0.0313657	Q9Y6M1	Insulin-like growth factor 2 mRNA-binding protein 2 OS=Homo sapiens OX=9606 GN=IGF2BP2 PE=1 SV=20	unknown	RIBOSOME	0.765119	RIBOSOME
Q96BZ9	0.0382572	0.194031	0.13514	0.253897	0.18491	0.117783	0.0465817	0.0134609	0.00832448	0.00761601	0.0869686	0.0996516	0.0949129	0.0978397	0.123066	0.0969338	0.0731359	0.0642857	0.0628223	0.200383	0.064974	0.0850589	0.0764981	0.0864491	0.098083	0.119375	0.0564133	0.0696934	0.0704251	0.27303	Q96BZ9	TBC1 domain family member 20 OS=Homo sapiens OX=9606 GN=TBC1D20 PE=1 SV=10	unknown	CYTOSOL	0.243885	unknown
O15231	0.197861	0.245398	0.0786284	0.106898	0.0795958	0.050305	0.0513799	0.0597909	0.0666971	0.0634456	0.197582	0.124027	0.0997018	0.0901588	0.0938341	0.0790844	0.0692029	0.0991215	0.0623358	0.084952	0.242823	0.172316	0.0957329	0.0746269	0.0893892	0.0758126	0.0414857	0.0710845	0.0536691	0.0830604	O15231	Zinc finger protein 185 OS=Homo sapiens OX=9606 GN=ZNF185 PE=1 SV=30	unknown	NUCLEUS-CHROMATIN	0.660986	NUCLEUS-CHROMATIN
P43121	0.137132	0.196368	0.105785	0.178967	0.148622	0.102564	0.0740653	0.0326233	0.014053	0.00982039	0.143337	0.162925	0.137676	0.151727	0.153069	0.103833	0.10824	0.0252407	0.00748918	0.00646472	0.241916	0.196208	0.169585	0.108783	0.10235	0.0690439	0.0645888	0.031791	0.00773391	0.00800121	P43121	Cell surface glycoprotein MUC18 OS=Homo sapiens OX=9606 GN=MCAM PE=1 SV=20	unknown	PM	0.844388	PM
Q02833	0.0573601	0.0801659	0.0494126	0.0632343	0.0684174	0.0905321	0.109191	0.265722	0.181064	0.0348998	0.0576037	0.0671083	0.0745968	0.0823733	0.105127	0.109159	0.136809	0.165323	0.158122	0.0437788	0.079269	0.0766419	0.0588235	0.0724158	0.101542	0.113649	0.0708167	0.188806	0.157738	0.080297	Q02833	Ras association domain-containing protein 7 OS=Homo sapiens OX=9606 GN=RASSF7 PE=1 SV=10	unknown	NUCLEUS	0.925907	NUCLEUS
B3KVZ3	0.111015	0.0981067	0.0748709	0.123064	0.10327	0.0645439	0.0748709	0.127367	0.101549	0.121343	0.142591	0.0677845	0.0679278	0.061049	0.098309	0.10834	0.0924334	0.121811	0.0829751	0.156778	0.106535	0.0761771	0.0386507	0.0565004	0.0893886	0.0996486	0.0702741	0.131272	0.0884048	0.243148	B3KVZ3	Centromere protein H OS=Homo sapiens OX=9606 GN=CENPH PE=1 SV=10	unknown	NUCLEUS-CHROMATIN	0.308053	unknown
E7ESY4	0.333237	0.21408	0.0320254	0.0438546	0.0626082	0.0487594	0.0406809	0.0813618	0.0784766	0.0649163	0.408823	0.100008	0.0444988	0.050539	0.0503097	0.0453399	0.0535974	0.097561	0.0767643	0.0725591	0.423823	0.176762	0.0491735	0.0418333	0.0446381	0.0499493	0.0279286	0.0661813	0.0633168	0.0563943	E7ESY4	Metastasis-associated protein MTA1 OS=Homo sapiens OX=9606 GN=MTA1 PE=1 SV=10	unknown	NUCLEUS-CHROMATIN	0.854664	NUCLEUS-CHROMATIN
G3V4T7	0.06856	0.11776	0.0604	0.08056	0.07888	0.05216	0.06	0.25832	0.21424	0.00912	0.0820135	0.089355	0.0749996	0.0701398	0.0745687	0.0707257	0.105899	0.238923	0.170714	0.0226619	0.105116	0.108606	0.0761111	0.0712261	0.0866446	0.0932525	0.0742356	0.168186	0.161534	0.0550879	G3V4T7	FERM domain-containing protein 6 OS=Homo sapiens OX=9606 GN=FRMD6 PE=1 SV=10	unknown	NUCLEUS	0.921086	NUCLEUS
Q9UID3	0.0403721	0.0795039	0.0650543	0.0951628	0.113209	0.10093	0.120248	0.217736	0.150667	0.0171163	0.0533729	0.0725156	0.0736929	0.084507	0.0960624	0.0951467	0.164174	0.208564	0.126499	0.0254655	0.045138	0.0550445	0.0605564	0.0802205	0.115899	0.150683	0.144091	0.187963	0.115787	0.0446166	Q9UID3	Vacuolar protein sorting-associated protein 51 homolog OS=Homo sapiens OX=9606 GN=VPS51 PE=1 SV=20	unknown	RIBOSOME	0.871907	RIBOSOME
Q9BT22	0.0435564	0.166453	0.146542	0.252352	0.215238	0.104339	0.0479447	0.0115544	0.00728274	0.00473845	0.0597721	0.124506	0.151795	0.208505	0.20145	0.132452	0.0940771	0.0172106	0.00534925	0.0048841	0.0606386	0.0979692	0.144585	0.171778	0.201371	0.159271	0.0931371	0.0371411	0.0159808	0.0181284	Q9BT22	Chitobiosyldiphosphodolichol beta-mannosyltransferase OS=Homo sapiens OX=9606 GN=ALG1 PE=1 SV=20	unknown	ER	0.938581	ER
Q92614	0.107233	0.211621	0.0970104	0.148709	0.119749	0.0832462	0.0530015	0.0626732	0.0702527	0.0465048	0.107777	0.126901	0.113927	0.134012	0.142842	0.112113	0.115693	0.0802561	0.0419119	0.0245657	0.204787	0.147848	0.0683652	0.0606061	0.0740012	0.0823393	0.0467477	0.078286	0.101641	0.135379	Q92614	Unconventional myosin-XVIIIa OS=Homo sapiens OX=9606 GN=MYO18A PE=1 SV=30	unknown	NUCLEUS-CHROMATIN	0.240069	unknown
Q13131	0.0413482	0.134974	0.0711556	0.117854	0.100352	0.085295	0.0607612	0.114491	0.138108	0.135662	0.0441029	0.0708298	0.0840499	0.0902121	0.112389	0.107051	0.111028	0.124534	0.107516	0.148287	0.045373	0.065551	0.0699821	0.0714103	0.0922474	0.125462	0.0723258	0.107445	0.111949	0.238254	Q13131	5'-AMP-activated protein kinase catalytic subunit alpha-1 OS=Homo sapiens OX=9606 GN=PRKAA1 PE=1 SV=40	unknown	CYTOSOL	0.552595	unknown
Q13257	0.0353679	0.0878494	0.123217	0.0912721	0.141472	0.196235	0.131774	0.0439247	0.0353679	0.11352	0.0535041	0.065059	0.107762	0.0592816	0.125597	0.164783	0.139161	0.0474755	0.0575232	0.179854	0.0587364	0.0809477	0.0735439	0.114511	0.185587	0.197927	0.0587364	0.0577493	0.0705824	0.101678	Q13257	Mitotic spindle assembly checkpoint protein MAD2A OS=Homo sapiens OX=9606 GN=MAD2L1 PE=1 SV=10	unknown	NUCLEUS	0.25631	unknown
P49257	0.0480055	0.178293	0.141779	0.215575	0.191718	0.100645	0.0737029	0.031761	0.0113063	0.00721539	0.0558414	0.127912	0.166057	0.168494	0.182749	0.130917	0.108381	0.0421016	0.00996637	0.00758178	0.0522526	0.10249	0.154134	0.146807	0.180183	0.159064	0.112867	0.0627213	0.0126024	0.0168788	P49257	Protein ERGIC-53 OS=Homo sapiens OX=9606 GN=LMAN1 PE=1 SV=20	unknown	ER	0.780748	unknown
H3BNT4	0.0610687	0.0875112	0.0385118	0.068943	0.078846	0.0696995	0.064748	0.248676	0.219448	0.0625473	0.0855221	0.0502242	0.0431134	0.0352979	0.0636771	0.0768738	0.101666	0.271108	0.180077	0.0924407	0.0810036	0.0634409	0.0508961	0.0491039	0.0695341	0.0989247	0.0519713	0.205376	0.173835	0.155914	H3BNT4	M-phase phosphoprotein 6 OS=Homo sapiens OX=9606 GN=MPHOSPH6 PE=1 SV=10	unknown	NUCLEUS	0.926225	NUCLEUS
Q99832	0.0293651	0.0869301	0.0479965	0.0817077	0.0834671	0.0709149	0.0657876	0.204259	0.254127	0.0754447	0.0371244	0.0484519	0.0601972	0.0588326	0.0822995	0.0751745	0.118697	0.23121	0.201107	0.0869066	0.0298638	0.0380992	0.0453275	0.0523819	0.0677823	0.0910456	0.0624102	0.184081	0.25777	0.171239	Q99832	T-complex protein 1 subunit eta OS=Homo sapiens OX=9606 GN=CCT7 PE=1 SV=20	unknown	NUCLEUS	0.832985	unknown
Q9UJX4	0.0508918	0.0704467	0.0477009	0.0691376	0.0818197	0.0620193	0.067583	0.187367	0.270414	0.0926199	0.0582985	0.0567569	0.0566757	0.0517668	0.0745263	0.0730253	0.0975699	0.195586	0.203254	0.132541	0.0867782	0.0563023	0.0471204	0.0475893	0.071423	0.0864265	0.0559506	0.155388	0.224779	0.168243	Q9UJX4	Anaphase-promoting complex subunit 5 OS=Homo sapiens OX=9606 GN=ANAPC5 PE=1 SV=20	NUCLEUS	NUCLEUS	1	NUCLEUS
P51991	0.211976	0.148582	0.022695	0.0746114	0.0898452	0.0628051	0.0852578	0.121663	0.163591	0.0189731	0.202758	0.0561879	0.0335488	0.0336233	0.0680247	0.0840914	0.122541	0.278638	0.101516	0.0190714	0.236374	0.095344	0.0392167	0.034658	0.0522306	0.0672553	0.105972	0.255246	0.0946071	0.0190963	P51991	Heterogeneous nuclear ribonucleoprotein A3 OS=Homo sapiens OX=9606 GN=HNRNPA3 PE=1 SV=20	NUCLEUS	NUCLEUS	1	NUCLEUS
B7ZKQ9	0.0844031	0.212878	0.143132	0.203679	0.149399	0.0850096	0.0633781	0.0324472	0.0138482	0.0118265	0.0964431	0.193394	0.177236	0.172866	0.146748	0.0917683	0.0867886	0.0240854	0.00579268	0.00487805	0.133512	0.181317	0.163991	0.142281	0.123683	0.0991443	0.0813945	0.0475921	0.0116682	0.0154162	B7ZKQ9	SCARB1 protein OS=Homo sapiens OX=9606 GN=SCARB1 PE=1 SV=10	unknown	PM	0.366916	unknown
Q16533	0.05	0.107692	0.0320513	0.1	0.0769231	0.0807692	0.0794872	0.224359	0.178205	0.0705128	0.0585735	0.0614077	0.051488	0.0713274	0.0661313	0.0684932	0.090222	0.256023	0.181389	0.0949457	0.0953237	0.0545564	0.0572542	0.0479616	0.0788369	0.0743405	0.0764388	0.169664	0.155875	0.189748	Q16533	snRNA-activating protein complex subunit 1 OS=Homo sapiens OX=9606 GN=SNAPC1 PE=1 SV=10	unknown	NUCLEUS	0.914991	NUCLEUS
Q9P0V9	0.0574442	0.212601	0.11305	0.219628	0.162027	0.0999073	0.0731381	0.0383579	0.0168769	0.00697028	0.0599801	0.113639	0.138707	0.165281	0.164286	0.146454	0.143495	0.045133	0.0148471	0.00817666	0.0808417	0.0887144	0.095033	0.12101	0.167918	0.186621	0.172879	0.0622227	0.0131054	0.0116545	Q9P0V9	Septin-10 OS=Homo sapiens OX=9606 GN=SEPT10 PE=1 SV=20	unknown	ER	0.258872	unknown
Q9Y6D9	0.0612906	0.0956883	0.0936465	0.0937017	0.128946	0.093389	0.173442	0.102513	0.103432	0.0539511	0.0738242	0.0654062	0.0858498	0.0768306	0.141301	0.144375	0.148383	0.117117	0.0778327	0.0690807	0.0866216	0.0683805	0.094608	0.0623789	0.094419	0.128208	0.083739	0.102311	0.105997	0.173338	Q9Y6D9	Mitotic spindle assembly checkpoint protein MAD1 OS=Homo sapiens OX=9606 GN=MAD1L1 PE=1 SV=20	unknown	NUCLEUS	0.437841	unknown
P09914	0.0405872	0.119927	0.0533247	0.106218	0.106865	0.0877591	0.0568869	0.12133	0.141516	0.165587	0.043701	0.0706129	0.0798716	0.0794395	0.105796	0.100056	0.10524	0.116351	0.0935745	0.205358	0.0500353	0.0587986	0.0567491	0.0635336	0.0913781	0.108127	0.0584452	0.110883	0.0979505	0.304099	P09914	Interferon-induced protein with tetratricopeptide repeats 1 OS=Homo sapiens OX=9606 GN=IFIT1 PE=1 SV=20	unknown	CYTOSOL	0.727262	unknown
M0R0P8	0.0390126	0.0942815	0.0473036	0.0855772	0.0885955	0.0807054	0.0844	0.225897	0.218984	0.0352428	0.0520003	0.0643913	0.0618612	0.0704101	0.0887623	0.0817776	0.131262	0.242305	0.173171	0.034059	0.0661215	0.072076	0.0679493	0.0692306	0.0869057	0.102075	0.067742	0.137877	0.131131	0.198892	M0R0P8	Unconventional myosin-IXb OS=Homo sapiens OX=9606 GN=MYO9B PE=1 SV=10	unknown	NUCLEUS	0.917322	NUCLEUS
Q9BXK5	0.235457	0.438336	0.134235	0.0711169	0.0475567	0.0221059	0.0129436	0.0126527	0.0074171	0.0181792	0.19234	0.365436	0.128822	0.0685982	0.0498784	0.0385172	0.0354999	0.047015	0.0322054	0.0416885	0.247687	0.340891	0.139555	0.0581115	0.0490482	0.0392323	0.019475	0.0212312	0.0215135	0.0632546	Q9BXK5	Bcl-2-like protein 13 OS=Homo sapiens OX=9606 GN=BCL2L13 PE=1 SV=10	unknown	MITOCHONDRIA	0.636048	unknown
P61201	0.0399054	0.0887474	0.065001	0.0872395	0.110335	0.0943666	0.0723345	0.104668	0.123494	0.213908	0.0402362	0.0566861	0.0738568	0.0590657	0.0911461	0.0939305	0.0918669	0.109482	0.10492	0.27881	0.0402283	0.0422615	0.0565901	0.0512758	0.0652553	0.0861723	0.0564243	0.112578	0.140336	0.348878	P61201	COP9 signalosome complex subunit 2 OS=Homo sapiens OX=9606 GN=COPS2 PE=1 SV=10	unknown	CYTOSOL	0.78475	unknown
Q9Y230	0.0614588	0.079909	0.0534281	0.0877463	0.0986606	0.0832646	0.0784871	0.148938	0.157498	0.15061	0.0680669	0.0598162	0.0716726	0.0680094	0.0989625	0.102425	0.119747	0.141393	0.10568	0.164227	0.0568095	0.0492313	0.0524644	0.0547587	0.0811143	0.105397	0.0774069	0.153523	0.135274	0.234022	Q9Y230	RuvB-like 2 OS=Homo sapiens OX=9606 GN=RUVBL2 PE=1 SV=30	unknown	NUCLEUS	0.542805	unknown
P38935	0.0277085	0.0855446	0.0399502	0.0814397	0.0862044	0.0635537	0.0737429	0.255095	0.267043	0.0197185	0.0401498	0.0513814	0.0534469	0.0515105	0.0831397	0.0793958	0.100568	0.312161	0.207333	0.020914	0.0259309	0.0338268	0.0351727	0.0542844	0.0735756	0.0847914	0.0825482	0.297712	0.294392	0.0177658	P38935	DNA-binding protein SMUBP-2 OS=Homo sapiens OX=9606 GN=IGHMBP2 PE=1 SV=30	unknown	NUCLEUS	0.891075	NUCLEUS
O14974	0.07752	0.161961	0.0784871	0.109038	0.110227	0.0975496	0.0752712	0.120504	0.103981	0.0654603	0.0799856	0.091052	0.0895637	0.0890956	0.122907	0.103475	0.115849	0.130337	0.103331	0.0744044	0.0987495	0.0988225	0.0749295	0.0698748	0.102577	0.123088	0.0743232	0.113183	0.0969672	0.147485	O14974	Protein phosphatase 1 regulatory subunit 12A OS=Homo sapiens OX=9606 GN=PPP1R12A PE=1 SV=10	unknown	NUCLEUS	0.593202	unknown
Q9H223	0.153318	0.163942	0.074062	0.130507	0.112092	0.0797101	0.0700301	0.115179	0.0871926	0.0139661	0.139564	0.109466	0.0889991	0.100852	0.115541	0.0891077	0.105851	0.144038	0.0855814	0.0210002	0.183603	0.132	0.0965439	0.0961645	0.109003	0.10401	0.0833491	0.101582	0.063576	0.0301681	Q9H223	EH domain-containing protein 4 OS=Homo sapiens OX=9606 GN=EHD4 PE=1 SV=10	unknown	NUCLEUS	0.336235	unknown
Q96GA3	0.02886	0.0800064	0.0359147	0.0549409	0.0602319	0.0416867	0.038961	0.17145	0.40372	0.0842285	0.0367133	0.0414018	0.0404482	0.0471233	0.0707247	0.050143	0.0588048	0.204704	0.34377	0.106167	0.0206979	0.0233117	0.0318593	0.0313648	0.0424555	0.0526632	0.0355326	0.198008	0.454931	0.109176	Q96GA3	Protein LTV1 homolog OS=Homo sapiens OX=9606 GN=LTV1 PE=1 SV=10	unknown	PROTEASOME	0.294535	unknown
Q96DZ1	0.0463958	0.17622	0.140799	0.27572	0.191632	0.0961066	0.038617	0.0120315	0.0130352	0.00944293	0.052301	0.117193	0.170767	0.215486	0.203586	0.133243	0.0821872	0.0128677	0.00439992	0.00796967	0.0636501	0.108038	0.14874	0.172166	0.194683	0.158264	0.0882008	0.0300304	0.012395	0.0238329	Q96DZ1	Endoplasmic reticulum lectin 1 OS=Homo sapiens OX=9606 GN=ERLEC1 PE=1 SV=10	ER	ER	1	ER
Q9UKV5	0.0500724	0.173702	0.132423	0.246741	0.20929	0.0984896	0.0563832	0.0189323	0.0113801	0.00258639	0.0450078	0.123167	0.164899	0.203822	0.21131	0.129251	0.0923557	0.0148206	0.00530421	0.0100624	0.0545715	0.101221	0.1438	0.171746	0.220486	0.155243	0.0978105	0.028606	0.0100121	0.0165035	Q9UKV5	E3 ubiquitin-protein ligase AMFR OS=Homo sapiens OX=9606 GN=AMFR PE=1 SV=20	unknown	ER	0.92814	ER
Q9UKG1	0.0398007	0.106772	0.0801228	0.102022	0.114246	0.108742	0.0522565	0.0421181	0.0709113	0.283008	0.0404873	0.0667861	0.0806879	0.0722322	0.109853	0.121892	0.0874239	0.0657112	0.0526693	0.302257	0.0436208	0.0615921	0.0708475	0.0549929	0.0698929	0.107288	0.0490164	0.0651199	0.0559475	0.421682	Q9UKG1	DCC-interacting protein 13-alpha OS=Homo sapiens OX=9606 GN=APPL1 PE=1 SV=10	unknown	CYTOSOL	0.887974	CYTOSOL
Q96JN8	0.0474308	0.115889	0.0966008	0.179605	0.143241	0.0785771	0.0591304	0.122372	0.124269	0.0328854	0.0553259	0.0870623	0.0969115	0.126946	0.14409	0.104694	0.100316	0.143361	0.105788	0.0355058	0.0477044	0.0774916	0.0957447	0.111646	0.128555	0.1243	0.0770437	0.137402	0.142441	0.0576708	Q96JN8	Neuralized-like protein 4 OS=Homo sapiens OX=9606 GN=NEURL4 PE=1 SV=20	unknown	NUCLEUS	0.401833	unknown
E9PP21	0.225917	0.344972	0.0864111	0.115791	0.0710491	0.0378608	0.0290597	0.0417013	0.0318121	0.015426	0.250374	0.221432	0.13243	0.105925	0.0774053	0.0409602	0.0492432	0.0622036	0.0412525	0.0187748	0.267493	0.266462	0.136715	0.0800892	0.0698342	0.0459802	0.0281455	0.0522781	0.0338024	0.0192002	E9PP21	Cysteine and glycine-rich protein 1 OS=Homo sapiens OX=9606 GN=CSRP1 PE=1 SV=10	unknown	NUCLEUS-CHROMATIN	0.313063	unknown
Q9NWV4	0.0371237	0.0976589	0.0782609	0.132776	0.117726	0.0849498	0.0705686	0.0488294	0.0464883	0.285619	0.051196	0.0700396	0.0956806	0.0795904	0.138186	0.108587	0.0931853	0.0525727	0.0388918	0.27207	0.03933	0.0523422	0.0625321	0.0724654	0.0878235	0.130342	0.0623121	0.0751778	0.0495198	0.368155	Q9NWV4	UPF0587 protein C1orf123 OS=Homo sapiens OX=9606 GN=C1orf123 PE=1 SV=10	unknown	CYTOSOL	0.926048	CYTOSOL
A6NKD9	0.027027	0.0868525	0.0561655	0.0743243	0.0641892	0.0543356	0.0644707	0.259713	0.287162	0.0257601	0.0449393	0.0500675	0.0531714	0.0610661	0.0846154	0.0785425	0.115317	0.284683	0.192982	0.0346154	0.0515499	0.0515009	0.0510594	0.0585148	0.085982	0.0957916	0.098195	0.254954	0.175839	0.0766137	A6NKD9	Coiled-coil domain-containing protein 85C OS=Homo sapiens OX=9606 GN=CCDC85C PE=1 SV=10	unknown	NUCLEUS	0.943604	NUCLEUS
Q13347	0.0204736	0.048057	0.0635782	0.0580318	0.0817109	0.112867	0.135882	0.245735	0.187267	0.0463975	0.0277092	0.0428961	0.0575318	0.0598551	0.0893888	0.0905899	0.118161	0.189502	0.225592	0.098774	0.0239859	0.0364285	0.0407674	0.0549222	0.0778513	0.110667	0.0810369	0.221492	0.252586	0.100262	Q13347	Eukaryotic translation initiation factor 3 subunit I OS=Homo sapiens OX=9606 GN=EIF3I PE=1 SV=10	unknown	NUCLEUS	0.781781	unknown
J3KNN5	0.0421523	0.0796142	0.0351711	0.068706	0.0714798	0.0522658	0.0619117	0.268559	0.299944	0.0201957	0.0436359	0.047345	0.0484409	0.0515139	0.0707416	0.0680977	0.121175	0.280736	0.23402	0.0342941	0.0375866	0.0374151	0.0388295	0.0465439	0.068933	0.087242	0.0856134	0.262875	0.277781	0.0571813	J3KNN5	Probable ATP-dependent RNA helicase DDX41 (Fragment) OS=Homo sapiens OX=9606 GN=DDX41 PE=1 SV=10	unknown	NUCLEUS	0.898366	NUCLEUS
Q9BX10	0.0445488	0.0901963	0.0475453	0.0794087	0.0815063	0.0671728	0.0666733	0.237727	0.234081	0.0511412	0.0439857	0.0641727	0.0629562	0.0643628	0.0739431	0.071396	0.119221	0.283683	0.197765	0.0185143	0.0460019	0.0571966	0.0492004	0.0651929	0.0979304	0.117592	0.112512	0.210348	0.191722	0.0523048	Q9BX10	GTP-binding protein 2 OS=Homo sapiens OX=9606 GN=GTPBP2 PE=1 SV=10	unknown	NUCLEUS	0.949387	NUCLEUS
Q7KZ85	0.142889	0.152719	0.0584343	0.0899804	0.0929037	0.0770985	0.0423721	0.041569	0.0671721	0.234861	0.144277	0.0756242	0.0770087	0.0625464	0.099555	0.0985414	0.073424	0.052707	0.0477627	0.268554	0.160832	0.0881467	0.0463849	0.0530607	0.0696158	0.0990236	0.0437952	0.0714573	0.0689635	0.29872	Q7KZ85	Transcription elongation factor SPT6 OS=Homo sapiens OX=9606 GN=SUPT6H PE=1 SV=20	unknown	CYTOSOL	0.607817	unknown
Q14517	0.0411611	0.175722	0.150487	0.284565	0.18496	0.0826439	0.036128	0.0144558	0.0155359	0.0143409	0.0501971	0.125814	0.176414	0.220497	0.208511	0.0964122	0.0732443	0.023007	0.0114231	0.0144799	0.0600889	0.116166	0.155709	0.184666	0.193609	0.148941	0.0729479	0.0286184	0.0174998	0.0217538	Q14517	Protocadherin Fat 1 OS=Homo sapiens OX=9606 GN=FAT1 PE=1 SV=20	unknown	ER	0.946017	ER
Q15149-4	0.140969	0.186123	0.0903084	0.0980176	0.0881057	0.064978	0.0517621	0.134361	0.0870044	0.05837	0.128682	0.102326	0.102326	0.0976744	0.137984	0.11938	0.103876	0.142636	0.0341085	0.0310078	0.198176	0.147181	0.0609453	0.0389718	0.0825041	0.102819	0.0754561	0.138474	0.111111	0.0443615	Q15149-4	Isoform 4 of Plectin OS=Homo sapiens OX=9606 GN=PLEC0	unknown	NUCLEUS	0.368646	unknown
Q15262	0.118428	0.164046	0.115936	0.172251	0.149442	0.0988402	0.0744845	0.0386598	0.0247423	0.0431701	0.136467	0.155096	0.142379	0.153683	0.138214	0.0967538	0.100435	0.037296	0.0152828	0.024393	0.160458	0.16634	0.135584	0.111751	0.118184	0.101642	0.0749908	0.0585713	0.0286117	0.0438672	Q15262	Receptor-type tyrosine-protein phosphatase kappa OS=Homo sapiens OX=9606 GN=PTPRK PE=1 SV=20	unknown	PM	0.823913	PM
Q6ZMI0	0.0418293	0.133659	0.07	0.154756	0.128415	0.101341	0.0718293	0.154024	0.125976	0.0181707	0.0499504	0.0755637	0.0854063	0.103134	0.137598	0.108467	0.149681	0.164657	0.112665	0.0128776	0.0511909	0.0674346	0.0753221	0.106872	0.146115	0.15162	0.111636	0.161968	0.0964077	0.031433	Q6ZMI0	Protein phosphatase 1 regulatory subunit 21 OS=Homo sapiens OX=9606 GN=PPP1R21 PE=1 SV=10	unknown	RIBOSOME	0.425803	unknown
Q9HAB8	0.0412552	0.0902613	0.0688836	0.0862608	0.104513	0.0944493	0.0965746	0.079885	0.106326	0.231591	0.0381652	0.0631526	0.0780586	0.0820912	0.11716	0.120976	0.120112	0.110319	0.0825952	0.187369	0.0377734	0.0573799	0.0565572	0.0782203	0.0839789	0.121752	0.054432	0.0896003	0.0594365	0.360869	Q9HAB8	Phosphopantothenate--cysteine ligase OS=Homo sapiens OX=9606 GN=PPCS PE=1 SV=20	CYTOSOL	CYTOSOL	1	CYTOSOL
Q9Y5B8	0.0353115	0.119985	0.0567573	0.0794971	0.101313	0.0913293	0.0702533	0.204289	0.14328	0.0979848	0.0370771	0.0562246	0.0606901	0.0543978	0.0796346	0.0769283	0.119959	0.25	0.132273	0.132815	0.0372481	0.0439405	0.0569429	0.0646679	0.0883399	0.11641	0.128877	0.195189	0.0908639	0.177521	Q9Y5B8	Nucleoside diphosphate kinase 7 OS=Homo sapiens OX=9606 GN=NME7 PE=1 SV=10	unknown	NUCLEUS	0.871305	NUCLEUS
Q9H7D0	0.0489643	0.0989984	0.0515536	0.101851	0.104161	0.0818655	0.0902692	0.228712	0.178523	0.0151017	0.0635192	0.0693022	0.069476	0.0771236	0.0894798	0.0885792	0.140374	0.222981	0.16515	0.0140153	0.110508	0.0934494	0.0631659	0.066368	0.0914678	0.103573	0.108857	0.197769	0.143477	0.0213664	Q9H7D0	Dedicator of cytokinesis protein 5 OS=Homo sapiens OX=9606 GN=DOCK5 PE=1 SV=30	unknown	NUCLEUS	0.92265	NUCLEUS
Q96P16	0.0741146	0.162651	0.0582329	0.0863454	0.0857977	0.0761227	0.0671778	0.108069	0.152245	0.129244	0.0800097	0.0665693	0.0671049	0.0694911	0.103531	0.105625	0.113514	0.122669	0.132505	0.138982	0.0995974	0.0872223	0.0542717	0.0659013	0.0864768	0.125242	0.0696287	0.129864	0.118831	0.162964	Q96P16	Regulation of nuclear pre-mRNA domain-containing protein 1A OS=Homo sapiens OX=9606 GN=RPRD1A PE=1 SV=10	unknown	NUCLEUS	0.572922	unknown
P35270	0.105809	0.238578	0.0660464	0.0720903	0.0787308	0.0648932	0.0421886	0.0309754	0.0409161	0.259772	0.113324	0.173204	0.104192	0.07223	0.113498	0.0989737	0.0901026	0.0543573	0.0370499	0.143068	0.109367	0.135836	0.0849071	0.0647327	0.0852105	0.124232	0.0549488	0.0745544	0.0480849	0.218127	P35270	Sepiapterin reductase OS=Homo sapiens OX=9606 GN=SPR PE=1 SV=10	unknown	CYTOSOL	0.563139	unknown
E7EM64	0.0425776	0.0834683	0.0531039	0.074359	0.10054	0.062888	0.0636302	0.101215	0.167341	0.250877	0.0433534	0.0582953	0.0715958	0.0555676	0.0838825	0.0917759	0.0858377	0.108746	0.113525	0.287421	0.0396854	0.0474868	0.0604185	0.0543342	0.0690255	0.0978143	0.057387	0.106485	0.126985	0.340379	E7EM64	COP9 signalosome complex subunit 6 OS=Homo sapiens OX=9606 GN=COPS6 PE=1 SV=10	unknown	CYTOSOL	0.698251	unknown
Q8NE71	0.0234386	0.0872685	0.0459183	0.0836377	0.0900374	0.077836	0.0770602	0.22358	0.264968	0.026256	0.03389	0.046713	0.0527492	0.0558761	0.0875365	0.0706622	0.109838	0.261935	0.235512	0.0452882	0.0269468	0.0299849	0.0344675	0.0339083	0.0503383	0.0523466	0.049877	0.29703	0.369739	0.0553614	Q8NE71	ATP-binding cassette sub-family F member 1 OS=Homo sapiens OX=9606 GN=ABCF1 PE=1 SV=20	unknown	NUCLEUS	0.753585	unknown
Q9NVG8	0.0353592	0.0992996	0.0632625	0.0742205	0.114437	0.0855174	0.0712833	0.0411207	0.0782874	0.337212	0.0337252	0.0482673	0.0618812	0.054146	0.121287	0.0906559	0.0860149	0.0532178	0.0615718	0.389233	0.0316558	0.0402481	0.0600168	0.0606628	0.0768784	0.106338	0.0562052	0.0708702	0.0559468	0.441178	Q9NVG8	TBC1 domain family member 13 OS=Homo sapiens OX=9606 GN=TBC1D13 PE=1 SV=30	unknown	CYTOSOL	0.881174	CYTOSOL
A0A0A0MT60	0.0349115	0.132459	0.108583	0.237803	0.188661	0.121144	0.0640172	0.0492609	0.0505323	0.0126288	0.0438329	0.0922701	0.121567	0.149707	0.187317	0.127129	0.114021	0.081338	0.0619022	0.0209155	0.0425103	0.0820637	0.127981	0.163006	0.20849	0.170721	0.0954295	0.0453568	0.035135	0.0293061	A0A0A0MT60	Peptidylprolyl isomerase (Fragment) OS=Homo sapiens OX=9606 GN=FKBP15 PE=1 SV=10	unknown	ER	0.646487	unknown
P19387	0.112573	0.0965053	0.0614581	0.0660775	0.0980116	0.0846556	0.0891745	0.102531	0.119201	0.169813	0.107639	0.0638678	0.0665077	0.0637827	0.108405	0.120157	0.0927361	0.0987823	0.0900962	0.188027	0.0937523	0.0676203	0.0543666	0.0557933	0.0752046	0.101149	0.05309	0.0979575	0.119284	0.281783	P19387	DNA-directed RNA polymerase II subunit RPB3 OS=Homo sapiens OX=9606 GN=POLR2C PE=1 SV=20	unknown	CYTOSOL	0.597544	unknown
O75976	0.0537833	0.198036	0.148333	0.17303	0.14777	0.105132	0.114237	0.0461281	0.00610726	0.0074441	0.055311	0.143823	0.13934	0.150065	0.162639	0.129632	0.162873	0.0453487	0.00170782	0.00926086	0.062715	0.137295	0.181589	0.160078	0.158757	0.118401	0.0963657	0.0572561	0.0114163	0.0161274	O75976	Carboxypeptidase D OS=Homo sapiens OX=9606 GN=CPD PE=1 SV=20	unknown	PM	0.291958	unknown
O15182	0.0465417	0.074122	0.0567766	0.071644	0.0860806	0.0759535	0.106012	0.243374	0.204482	0.035014	0.0474975	0.0639139	0.0630631	0.0666166	0.103053	0.0903904	0.134685	0.248649	0.155105	0.027027	0.0500019	0.0607414	0.065476	0.0674391	0.0958466	0.124177	0.108472	0.228723	0.141383	0.0577389	O15182	Centrin-3 OS=Homo sapiens OX=9606 GN=CETN3 PE=1 SV=20	unknown	NUCLEUS	0.883834	NUCLEUS
P63165	0.119323	0.0998742	0.0430157	0.066354	0.0787095	0.0938108	0.0673836	0.140144	0.126416	0.16497	0.133461	0.062331	0.0557931	0.0470432	0.0827803	0.0796834	0.0849924	0.206164	0.0979207	0.14983	0.176695	0.0831142	0.0424336	0.0454756	0.0669245	0.0721836	0.0682135	0.173653	0.127095	0.144212	P63165	Small ubiquitin-related modifier 1 OS=Homo sapiens OX=9606 GN=SUMO1 PE=1 SV=10.001	unknown	NUCLEUS	0.621225	unknown
Q53GS9	0.043845	0.0818796	0.0411942	0.0757347	0.0876364	0.079751	0.0886405	0.264864	0.215262	0.0211929	0.0520126	0.0467474	0.0516189	0.0547559	0.0780435	0.0801102	0.14285	0.274628	0.189585	0.0296477	0.0505002	0.037427	0.0379627	0.0464618	0.073968	0.0933666	0.105935	0.264606	0.239397	0.0503765	Q53GS9	U4/U6.U5 tri-snRNP-associated protein 2 OS=Homo sapiens OX=9606 GN=USP39 PE=1 SV=20	unknown	NUCLEUS	0.960452	NUCLEUS
Q99543	0.0315606	0.0996334	0.0496844	0.0978191	0.110954	0.101712	0.0932834	0.189326	0.17948	0.0465472	0.0437871	0.0599649	0.0574212	0.0660917	0.0963069	0.0865661	0.130617	0.228165	0.1872	0.0438802	0.0389973	0.0493594	0.0504947	0.0699032	0.108234	0.134256	0.132382	0.210611	0.149177	0.0565858	Q99543	DnaJ homolog subfamily C member 2 OS=Homo sapiens OX=9606 GN=DNAJC2 PE=1 SV=40	unknown	RIBOSOME	0.541929	unknown
P42892	0.0740634	0.125052	0.115067	0.175327	0.193843	0.127841	0.124835	0.0413921	0.016286	0.00629232	0.0817884	0.116491	0.124146	0.156108	0.170932	0.136457	0.148801	0.0417255	0.0116296	0.0119216	0.109902	0.128635	0.129055	0.143998	0.166547	0.142168	0.0968417	0.0484865	0.014321	0.0200459	P42892	Endothelin-converting enzyme 1 OS=Homo sapiens OX=9606 GN=ECE1 PE=1 SV=20	unknown	PM	0.481683	unknown
P52298	0.0578601	0.0652437	0.0414821	0.0668546	0.0947778	0.0706135	0.107397	0.207545	0.179084	0.109142	0.0612072	0.0466174	0.0521135	0.0558109	0.0831918	0.092835	0.145398	0.204707	0.127811	0.130309	0.0705945	0.0548478	0.0428167	0.0507785	0.0808563	0.0997877	0.0858103	0.206653	0.134643	0.173213	P52298	Nuclear cap-binding protein subunit 2 OS=Homo sapiens OX=9606 GN=NCBP2 PE=1 SV=10	unknown	NUCLEUS	0.935993	NUCLEUS
Q96AX1	0.0391312	0.147614	0.0987882	0.149366	0.117972	0.0864094	0.0725951	0.172353	0.109415	0.0063572	0.0452412	0.0944553	0.109503	0.10846	0.112333	0.0864103	0.1172	0.194324	0.119311	0.0127629	0.0453959	0.0813839	0.100478	0.110898	0.129713	0.141347	0.107913	0.147973	0.104676	0.0302218	Q96AX1	Vacuolar protein sorting-associated protein 33A OS=Homo sapiens OX=9606 GN=VPS33A PE=1 SV=10	unknown	NUCLEUS	0.376242	unknown
Q2M389	0.0414328	0.13466	0.108429	0.212398	0.173484	0.105319	0.0605031	0.0491246	0.0604727	0.0541767	0.049185	0.102108	0.128763	0.151431	0.163954	0.121287	0.0975601	0.0608863	0.0498206	0.075005	0.0409678	0.0830062	0.126605	0.160415	0.176963	0.153339	0.0807835	0.0435168	0.0428949	0.0915097	Q2M389	WASH complex subunit 4 OS=Homo sapiens OX=9606 GN=WASHC4 PE=1 SV=20	unknown	ER	0.540946	unknown
Q96MW5	0.0597118	0.153326	0.110492	0.0919858	0.0882846	0.0837446	0.0866561	0.0966739	0.0966739	0.132452	0.0547354	0.101749	0.0986827	0.0806268	0.096298	0.102998	0.10243	0.118783	0.0710879	0.17261	0.0684147	0.114202	0.118994	0.0853188	0.0883801	0.0962332	0.0471183	0.102223	0.0881139	0.191002	Q96MW5	Conserved oligomeric Golgi complex subunit 8 OS=Homo sapiens OX=9606 GN=COG8 PE=1 SV=20	unknown	CYTOSOL	0.465351	unknown
O75348	0.0320563	0.247068	0.106333	0.183268	0.113995	0.0742768	0.0444097	0.0591087	0.068491	0.070993	0.0478743	0.120185	0.141005	0.118938	0.123177	0.0906371	0.0951253	0.0961227	0.0796659	0.0872709	0.0565869	0.0937165	0.129954	0.0963941	0.09211	0.106748	0.0719386	0.121564	0.101571	0.129418	O75348	V-type proton ATPase subunit G 1 OS=Homo sapiens OX=9606 GN=ATP6V1G1 PE=1 SV=30	unknown	GOLGI	0.182582	unknown
O43520	0.155126	0.224146	0.112073	0.174675	0.143337	0.0828981	0.0677511	0.0277571	0.00820773	0.00402925	0.158416	0.18466	0.141127	0.143098	0.129695	0.103058	0.095399	0.0255111	0.0107563	0.00827843	0.21019	0.228079	0.1134	0.101421	0.121067	0.0865676	0.0594154	0.0360965	0.0124581	0.0313049	O43520	Phospholipid-transporting ATPase IC OS=Homo sapiens OX=9606 GN=ATP8B1 PE=1 SV=30	unknown	PM	0.820243	PM
P17980	0.0215908	0.054213	0.0451973	0.0541852	0.07303	0.0556614	0.0556019	0.127021	0.337238	0.176262	0.0308511	0.0486383	0.0634914	0.0550072	0.0901974	0.0795709	0.0738346	0.135607	0.21295	0.209853	0.0249183	0.0353178	0.0455148	0.0475776	0.0613561	0.0801239	0.0402312	0.133352	0.286677	0.244931	P17980	26S proteasome regulatory subunit 6A OS=Homo sapiens OX=9606 GN=PSMC3 PE=1 SV=30	unknown	PROTEASOME	0.877638	PROTEASOME
Q9NZ45	0.123784	0.556587	0.0893015	0.0725022	0.0623342	0.0251989	0.0132626	0.0145889	0.0243148	0.0181256	0.177264	0.367659	0.136073	0.0857991	0.0768504	0.045058	0.0393021	0.0209551	0.0188416	0.0321971	0.218061	0.299592	0.132569	0.0812317	0.0692093	0.057947	0.0334646	0.0301251	0.0207513	0.0570488	Q9NZ45	CDGSH iron-sulfur domain-containing protein 1 OS=Homo sapiens OX=9606 GN=CISD1 PE=1 SV=10	unknown	MITOCHONDRIA	0.398724	unknown
Q9UJX2	0.0647493	0.0734436	0.0480575	0.0615943	0.0759015	0.0571554	0.0749844	0.191386	0.262629	0.0900987	0.0706263	0.0586753	0.0601152	0.0514399	0.0660547	0.0789057	0.0991721	0.181389	0.216631	0.116991	0.0816986	0.0626849	0.0428767	0.0506027	0.0611781	0.0837534	0.0506301	0.158685	0.24137	0.166521	Q9UJX2	Cell division cycle protein 23 homolog OS=Homo sapiens OX=9606 GN=CDC23 PE=1 SV=30	unknown	NUCLEUS	0.663927	unknown
P54725-3	0.0387398	0.0884082	0.0955683	0.0801929	0.116144	0.0942116	0.115164	0.0489901	0.0560748	0.266506	0.0517456	0.0891215	0.108419	0.108224	0.16702	0.16158	0.12801	0.0543804	0.0589426	0.0725561	0.0525265	0.0797436	0.0863914	0.103085	0.137427	0.195439	0.0706514	0.0995976	0.0891638	0.0859741	P54725-3	Isoform 3 of UV excision repair protein RAD23 homolog A OS=Homo sapiens OX=9606 GN=RAD23A0	unknown	CYTOSOL	0.694987	unknown
A8MUM1	0.0457623	0.0705604	0.0671344	0.0872012	0.0945428	0.0865487	0.133861	0.252875	0.136553	0.0249613	0.0427427	0.058969	0.0665216	0.0692919	0.0965997	0.0901026	0.142607	0.266218	0.132087	0.0348603	0.0447111	0.0468333	0.0519191	0.0684571	0.107277	0.127694	0.142805	0.239801	0.131536	0.0389667	A8MUM1	EARP-interacting protein OS=Homo sapiens OX=9606 GN=EIPR1 PE=1 SV=20	unknown	RIBOSOME	0.737111	RIBOSOME
Q8N5I2	0.0484362	0.118324	0.0766648	0.114655	0.101411	0.104645	0.079898	0.203818	0.133371	0.0187776	0.0736248	0.0764061	0.0777194	0.0967244	0.0986557	0.07911	0.126468	0.211449	0.140528	0.019314	0.121173	0.115396	0.0883882	0.0934431	0.109908	0.0943096	0.0971982	0.155257	0.0928654	0.0320624	Q8N5I2	Arrestin domain-containing protein 1 OS=Homo sapiens OX=9606 GN=ARRDC1 PE=1 SV=10	unknown	NUCLEUS	0.820883	unknown
A8K727	0.0280387	0.0959267	0.0496141	0.0890914	0.104203	0.086627	0.087464	0.193341	0.18553	0.0801637	0.0376936	0.055087	0.0610198	0.0644031	0.0935907	0.095878	0.124041	0.203693	0.158589	0.106004	0.026748	0.0472225	0.0607391	0.0633056	0.0881716	0.116174	0.0857192	0.158036	0.145204	0.20868	A8K727	Pleckstrin homology domain-containing family A member 2 OS=Homo sapiens OX=9606 GN=PLEKHA2 PE=1 SV=10	unknown	NUCLEUS	0.896442	NUCLEUS
J3QRU4	0.0689868	0.134305	0.101864	0.161478	0.17194	0.127366	0.14404	0.0684056	0.0147855	0.00682966	0.0733889	0.111462	0.115966	0.131414	0.155617	0.139727	0.196847	0.0582986	0.0097024	0.00757671	0.0940471	0.118821	0.130263	0.135446	0.156529	0.135387	0.126366	0.0857497	0.0145574	0.0028347	J3QRU4	Vesicle-associated membrane protein 2 OS=Homo sapiens OX=9606 GN=VAMP2 PE=4 SV=20	unknown	PM	0.314956	unknown
O95292	0.0476142	0.194334	0.129561	0.260762	0.198034	0.0925333	0.0418073	0.0154222	0.0120363	0.00789668	0.0541614	0.118948	0.158087	0.199715	0.22543	0.117689	0.0919446	0.0185865	0.00717696	0.00826174	0.0686573	0.110507	0.14433	0.167852	0.202024	0.151476	0.0880489	0.037421	0.0140811	0.0156036	O95292	Vesicle-associated membrane protein-associated protein B/C OS=Homo sapiens OX=9606 GN=VAPB PE=1 SV=30	ER	ER	1	ER
Q9NR30	0.221696	0.148559	0.030492	0.0559938	0.0591244	0.056501	0.0686728	0.195399	0.151759	0.0118023	0.262834	0.0727244	0.0386531	0.0449073	0.0600783	0.0537552	0.121074	0.200797	0.127198	0.0179789	0.194607	0.0970391	0.0329768	0.0410159	0.0651916	0.0743806	0.0984739	0.247273	0.129268	0.0197751	Q9NR30	Nucleolar RNA helicase 2 OS=Homo sapiens OX=9606 GN=DDX21 PE=1 SV=50	NUCLEUS	NUCLEUS	1	NUCLEUS
F8VW96	0.180247	0.284362	0.0773663	0.111934	0.0995885	0.0736626	0.0131687	0.0654321	0.0604938	0.0337449	0.224852	0.207379	0.103446	0.0907762	0.0776192	0.0449704	0.0588235	0.104351	0.0783153	0.00946746	0.196134	0.182777	0.139895	0.0956063	0.0699473	0.0783831	0.0502636	0.0678383	0.0776801	0.0414763	F8VW96	Cysteine and glycine-rich protein 2 OS=Homo sapiens OX=9606 GN=CSRP2 PE=1 SV=10	unknown	NUCLEUS-CHROMATIN	0.437	unknown
Q02388	0.0477828	0.226669	0.180045	0.28604	0.157023	0.0557015	0.0200479	0.00861403	0.0110476	0.00703028	0.0601659	0.163685	0.20326	0.230236	0.185844	0.0789429	0.0443357	0.0130155	0.010163	0.0103519	0.0888692	0.163927	0.227445	0.182212	0.160696	0.083863	0.0389135	0.0196343	0.0150186	0.0194213	Q02388	Collagen alpha-1(VII) chain OS=Homo sapiens OX=9606 GN=COL7A1 PE=1 SV=20	unknown	PEROXISOME	0.545498	PEROXISOME
O00571	0.0323098	0.1055	0.0501432	0.0877271	0.0895503	0.0811298	0.0805171	0.250464	0.208095	0.0145629	0.0390093	0.0528432	0.0556859	0.0618754	0.0798805	0.0747204	0.136105	0.286201	0.195095	0.0185844	0.0376209	0.0456171	0.0490264	0.0643519	0.100623	0.123245	0.136905	0.263534	0.158762	0.020315	O00571	ATP-dependent RNA helicase DDX3X OS=Homo sapiens OX=9606 GN=DDX3X PE=1 SV=30	unknown	NUCLEUS	0.839153	unknown
Q8TAF3	0.0812045	0.153455	0.0720184	0.124374	0.121355	0.0994994	0.0642514	0.127187	0.119807	0.0368478	0.0840336	0.0924966	0.0885035	0.102032	0.105847	0.104714	0.128315	0.129984	0.122117	0.0419572	0.100604	0.0885905	0.0810099	0.0765129	0.0942439	0.088976	0.0781832	0.137672	0.144803	0.109405	Q8TAF3	WD repeat-containing protein 48 OS=Homo sapiens OX=9606 GN=WDR48 PE=1 SV=10	unknown	NUCLEUS	0.735492	unknown
cRAP013	0.118461	0.222222	0.0946822	0.12192	0.0933852	0.0613921	0.0488543	0.0488543	0.0518807	0.138348	0.0755089	0.103086	0.118844	0.0840446	0.143139	0.105712	0.0840446	0.10046	0.101773	0.083388	0.0953039	0.115101	0.108656	0.092081	0.0976059	0.144107	0.0667587	0.0755064	0.0718232	0.133057	cRAP013	Alpha-S1-casein OS=Bos taurus GN=CSN1S1 PE=1 SV=20	unknown	CYTOSOL	0.319451	unknown
O96013	0.0477469	0.12025	0.056928	0.096747	0.0927063	0.0748044	0.0828091	0.234055	0.182676	0.0112782	0.0694156	0.0694655	0.0644443	0.0744202	0.0901322	0.0747361	0.125946	0.246671	0.166032	0.018738	0.0837726	0.0753686	0.0619604	0.0637176	0.121018	0.12522	0.141187	0.200283	0.111773	0.0157002	O96013	Serine/threonine-protein kinase PAK 4 OS=Homo sapiens OX=9606 GN=PAK4 PE=1 SV=10	unknown	NUCLEUS	0.741526	unknown
P08865	0.0289851	0.0668118	0.0689762	0.0935471	0.115026	0.0988889	0.130538	0.19191	0.183423	0.0218934	0.0366905	0.056175	0.0720565	0.0844968	0.112819	0.0994355	0.150596	0.188721	0.153488	0.0455218	0.0274001	0.0424943	0.0535256	0.073825	0.114534	0.134429	0.134503	0.227782	0.165382	0.0261254	P08865	40S ribosomal protein SA OS=Homo sapiens OX=9606 GN=RPSA PE=1 SV=40	RIBOSOME	RIBOSOME	1	RIBOSOME
M0QZ22	0.0293973	0.0918579	0.0553623	0.10881	0.105564	0.0876783	0.0944264	0.245406	0.166437	0.0150606	0.034084	0.0492122	0.0619304	0.0639354	0.081433	0.083276	0.146178	0.281178	0.166876	0.0318968	0.0363064	0.0423146	0.0489654	0.0667009	0.0913443	0.114478	0.11406	0.255494	0.158495	0.0718417	M0QZ22	Protein Smaug homolog 2 OS=Homo sapiens OX=9606 GN=SAMD4B PE=1 SV=10	unknown	NUCLEUS	0.839249	unknown
B7Z6Z4	0.074697	0.130194	0.119858	0.147432	0.139593	0.076329	0.0846852	0.0568967	0.0510019	0.119314	0.0762346	0.0976144	0.106478	0.136993	0.148075	0.100062	0.0979196	0.0688046	0.0399201	0.127899	0.09289	0.0909741	0.0832318	0.0777873	0.0800366	0.0963883	0.0445261	0.0592893	0.0556516	0.319225	B7Z6Z4	Myosin light polypeptide 6 OS=Homo sapiens OX=9606 GN=MYL6 PE=1 SV=10	unknown	CYTOSOL	0.446052	unknown
P18031	0.0483048	0.21254	0.137942	0.273707	0.179702	0.0897639	0.0329009	0.0121812	0.00766233	0.00529585	0.0669255	0.133707	0.167141	0.211914	0.198861	0.111536	0.0827304	0.0135237	0.00615069	0.00751025	0.076102	0.123584	0.146915	0.176038	0.196122	0.151491	0.0810018	0.0278711	0.010129	0.0107459	P18031	Tyrosine-protein phosphatase non-receptor type 1 OS=Homo sapiens OX=9606 GN=PTPN1 PE=1 SV=10	ER	ER	1	ER
P30085	0.034998	0.107067	0.0654193	0.0929869	0.11229	0.081303	0.0657693	0.038094	0.0534392	0.348634	0.0427315	0.0685874	0.0866147	0.0700896	0.113339	0.0929076	0.0864478	0.0616435	0.0438665	0.333773	0.0552579	0.078044	0.0912035	0.0927049	0.105541	0.15547	0.0740403	0.0924399	0.0577897	0.197509	P30085	UMP-CMP kinase OS=Homo sapiens OX=9606 GN=CMPK1 PE=1 SV=30	unknown	CYTOSOL	0.864167	CYTOSOL
F8WA39	0.0533518	0.133082	0.0642602	0.092622	0.107497	0.0811186	0.0692186	0.139825	0.133677	0.125347	0.0495646	0.0838197	0.115491	0.117118	0.13702	0.144388	0.160463	0.0609511	0.0812362	0.0499474	0.0426247	0.0690889	0.0598698	0.0873102	0.126356	0.154881	0.0639913	0.114751	0.105315	0.175813	F8WA39	Myotubularin-related protein 1 OS=Homo sapiens OX=9606 GN=MTMR1 PE=1 SV=10	unknown	CYTOSOL	0.38781	unknown
A2ACR1	0.0222552	0.04944	0.044438	0.0494762	0.0678894	0.0614013	0.0546595	0.130813	0.327377	0.192251	0.0254545	0.0426738	0.0568984	0.0482353	0.0698396	0.0571123	0.0530481	0.153369	0.231551	0.261818	0.027299	0.0340923	0.0460435	0.0433178	0.0490208	0.068646	0.0374051	0.129408	0.271355	0.293412	A2ACR1	Proteasome subunit beta type OS=Homo sapiens OX=9606 GN=PSMB9 PE=1 SV=10	unknown	PROTEASOME	0.827411	PROTEASOME
A3KMH1	0.193964	0.506667	0.0857689	0.0742311	0.0459217	0.0247947	0.0108883	0.0238777	0.0206304	0.0132569	0.231476	0.414192	0.128451	0.0661932	0.0509131	0.0264096	0.0227818	0.0230892	0.0148804	0.0216135	0.289196	0.36059	0.127955	0.0652928	0.0541489	0.0357704	0.015967	0.0207899	0.01699	0.0132997	A3KMH1	von Willebrand factor A domain-containing protein 8 OS=Homo sapiens OX=9606 GN=VWA8 PE=1 SV=20	unknown	MITOCHONDRIA	0.83515	unknown
O60264	0.251641	0.188618	0.0415186	0.070041	0.0714415	0.0532649	0.0490633	0.105144	0.0975242	0.0717427	0.296393	0.0963847	0.0475111	0.0575167	0.0690408	0.0636532	0.0759886	0.106942	0.0831548	0.103416	0.311261	0.136244	0.0390032	0.0487355	0.0648272	0.0738108	0.054412	0.0857068	0.0666782	0.119321	O60264	SWI/SNF-related matrix-associated actin-dependent regulator of chromatin subfamily A member 5 OS=Homo sapiens OX=9606 GN=SMARCA5 PE=1 SV=10	NUCLEUS-CHROMATIN	NUCLEUS-CHROMATIN	1	NUCLEUS-CHROMATIN
G3V5N8	0.0679449	0.262439	0.122812	0.151917	0.116814	0.0672566	0.0495575	0.0597837	0.0603736	0.0411013	0.0648749	0.169293	0.15607	0.165524	0.142725	0.0827927	0.0708681	0.0698795	0.0496138	0.0283596	0.0810216	0.121657	0.127905	0.111361	0.117909	0.103314	0.0587294	0.0985155	0.0766232	0.102964	G3V5N8	Zinc finger FYVE domain-containing protein 1 OS=Homo sapiens OX=9606 GN=ZFYVE1 PE=1 SV=10	unknown	GOLGI	0.418061	unknown
Q5VT06	0.03458	0.126855	0.053072	0.080024	0.084046	0.0672646	0.0716564	0.23397	0.219823	0.0287088	0.0396304	0.0625835	0.063339	0.0710094	0.0864664	0.0790865	0.127317	0.249695	0.189552	0.0313208	0.0427285	0.0527822	0.0526077	0.0607066	0.0872722	0.102772	0.116805	0.235984	0.195909	0.0524331	Q5VT06	Centrosome-associated protein 350 OS=Homo sapiens OX=9606 GN=CEP350 PE=1 SV=10	unknown	NUCLEUS	0.953897	NUCLEUS
O43684	0.0665623	0.10154	0.0543918	0.10092	0.0989298	0.0987666	0.0930566	0.195608	0.15727	0.0329548	0.0705889	0.0565337	0.06851	0.0758688	0.107548	0.101882	0.162003	0.197178	0.134389	0.0254981	0.0736961	0.0574774	0.0508119	0.0668724	0.10014	0.124983	0.13592	0.214799	0.134615	0.0406851	O43684	Mitotic checkpoint protein BUB3 OS=Homo sapiens OX=9606 GN=BUB3 PE=1 SV=10	unknown	NUCLEUS	0.476191	unknown
Q9H0H5	0.194542	0.440453	0.0363094	0.0287418	0.0432656	0.0325638	0.0311115	0.098303	0.0842379	0.0104724	0.260588	0.31833	0.0538032	0.02681	0.0437265	0.0382607	0.057101	0.107606	0.0795444	0.0142294	0.282626	0.258827	0.0406119	0.0268196	0.0479414	0.0534226	0.0581772	0.12334	0.0897514	0.0184831	Q9H0H5	Rac GTPase-activating protein 1 OS=Homo sapiens OX=9606 GN=RACGAP1 PE=1 SV=10	unknown	NUCLEUS-CHROMATIN	0.532381	unknown
Q92734	0.030305	0.0754684	0.0680789	0.0812052	0.114291	0.0787897	0.104915	0.0612297	0.106918	0.278799	0.035603	0.0722553	0.106244	0.0847499	0.132266	0.145826	0.103266	0.0653381	0.0640709	0.19038	0.0379541	0.0533925	0.0786678	0.0792361	0.0997992	0.131428	0.062386	0.0848926	0.0720304	0.300214	Q92734	Protein TFG OS=Homo sapiens OX=9606 GN=TFG PE=1 SV=20	unknown	CYTOSOL	0.883792	CYTOSOL
Q15035	0.055755	0.176164	0.172132	0.256011	0.182998	0.104332	0.0395791	0.00624416	0.00447416	0.00231083	0.0599961	0.129861	0.158709	0.185287	0.155625	0.162494	0.0980964	0.018924	0.00933584	0.0216715	0.0587069	0.109322	0.143227	0.187935	0.207517	0.156053	0.0757809	0.0265011	0.0124616	0.0224955	Q15035	Translocating chain-associated membrane protein 2 OS=Homo sapiens OX=9606 GN=TRAM2 PE=1 SV=10	unknown	ER	0.844536	unknown
Q9H1K0	0.0244568	0.12053	0.0760986	0.165156	0.148592	0.104453	0.0742473	0.146741	0.125597	0.0141284	0.0518821	0.0813605	0.0933333	0.107392	0.120998	0.110204	0.115737	0.166893	0.12	0.0321995	0.0315562	0.0556196	0.0791066	0.113256	0.135591	0.139625	0.079683	0.11513	0.0651297	0.185303	Q9H1K0	Rabenosyn-5 OS=Homo sapiens OX=9606 GN=RBSN PE=1 SV=20	unknown	NUCLEUS	0.492628	unknown
Q8IZ83	0.0228169	0.0754967	0.0506109	0.078932	0.0819183	0.0625952	0.0503962	0.10942	0.259476	0.208338	0.0326846	0.0485521	0.0701908	0.0527454	0.083779	0.0815873	0.0729523	0.110458	0.167324	0.279726	0.0250904	0.037136	0.0513254	0.0503261	0.0614996	0.0783961	0.0399339	0.120274	0.209589	0.326429	Q8IZ83	Aldehyde dehydrogenase family 16 member A1 OS=Homo sapiens OX=9606 GN=ALDH16A1 PE=1 SV=20	unknown	PROTEASOME	0.536662	unknown
P20810-6	0.0545802	0.116672	0.0576576	0.103981	0.110145	0.0936589	0.0803077	0.147169	0.129077	0.106752	0.0949778	0.0711097	0.0810165	0.0826033	0.117211	0.102206	0.121543	0.147082	0.0981815	0.0840694	0.0585325	0.053371	0.0515553	0.0594969	0.0975205	0.11435	0.0940318	0.18926	0.12921	0.152672	P20810-6	Isoform 6 of Calpastatin OS=Homo sapiens OX=9606 GN=CAST0	unknown	NUCLEUS	0.859447	unknown
Q5W111	0.0511486	0.193745	0.119125	0.156158	0.146582	0.108608	0.124218	0.0614448	0.014171	0.0247993	0.052497	0.130277	0.12522	0.130277	0.14806	0.131754	0.204761	0.064485	0.00499972	0.00767002	0.0550956	0.120837	0.143062	0.138953	0.14798	0.137334	0.116728	0.0906431	0.0199216	0.0294466	Q5W111	SPRY domain-containing protein 7 OS=Homo sapiens OX=9606 GN=SPRYD7 PE=1 SV=20	unknown	PM	0.293289	unknown
P07996	0.0446854	0.220835	0.140209	0.273791	0.168353	0.0818688	0.0433683	0.0132128	0.00680659	0.00686981	0.0564782	0.142971	0.1894	0.215924	0.163116	0.104087	0.0840133	0.0220834	0.0087732	0.0131538	0.0623907	0.131447	0.168934	0.190542	0.176014	0.134282	0.080214	0.0252803	0.00803705	0.0228591	P07996	Thrombospondin-1 OS=Homo sapiens OX=9606 GN=THBS1 PE=1 SV=20	unknown	ER	0.890232	ER
C9J5X1	0.120025	0.174801	0.116988	0.185903	0.173963	0.11416	0.0713238	0.0285924	0.0124633	0.00178048	0.124339	0.160081	0.135917	0.160836	0.143301	0.104455	0.115865	0.0380065	0.0107392	0.00646027	0.183288	0.179587	0.136735	0.118621	0.128555	0.118621	0.0631087	0.0231788	0.013245	0.0350604	C9J5X1	Tyrosine-protein kinase receptor OS=Homo sapiens OX=9606 GN=IGF1R PE=1 SV=10	unknown	PM	0.864344	PM
Q13043	0.0427786	0.0989126	0.0814533	0.0952955	0.120313	0.098843	0.0876672	0.0675647	0.0862992	0.220872	0.0397029	0.066265	0.0846925	0.0747367	0.114961	0.120127	0.094215	0.0735173	0.0580581	0.273724	0.0428813	0.0580852	0.0738092	0.0753348	0.0996923	0.122524	0.0616998	0.0859186	0.0677068	0.312348	Q13043	Serine/threonine-protein kinase 4 OS=Homo sapiens OX=9606 GN=STK4 PE=1 SV=20	unknown	CYTOSOL	0.92331	CYTOSOL
P04062	0.0500044	0.269301	0.194534	0.221386	0.116329	0.0746801	0.0225433	0.0136217	0.0159718	0.0216294	0.0510216	0.20932	0.245609	0.205133	0.122126	0.0725778	0.0503625	0.017214	0.0118249	0.0148102	0.0784154	0.199978	0.242148	0.190088	0.117107	0.078035	0.0432018	0.020813	0.0145093	0.0157048	P04062	Glucosylceramidase OS=Homo sapiens OX=9606 GN=GBA PE=1 SV=30	unknown	LYSOSOME	0.372346	unknown
E9PDF6	0.180133	0.28958	0.114484	0.180738	0.113691	0.0523627	0.0266842	0.0146716	0.0125026	0.0151531	0.19696	0.2216	0.159677	0.150172	0.10583	0.061515	0.0518635	0.0188393	0.0119901	0.0215535	0.257639	0.241224	0.13212	0.113692	0.0956986	0.0619492	0.0310306	0.0223265	0.0130997	0.0312203	E9PDF6	Unconventional myosin-Ib OS=Homo sapiens OX=9606 GN=MYO1B PE=1 SV=10	unknown	PM	0.247916	unknown
Q08AD1-2	0.034501	0.105134	0.0535988	0.0922265	0.0948177	0.102447	0.0892514	0.241507	0.16142	0.025096	0.0476352	0.0572439	0.0571985	0.0652888	0.102069	0.0852313	0.145421	0.238086	0.174338	0.0274888	0.0424981	0.0467542	0.0466295	0.0630301	0.10319	0.123784	0.120354	0.226677	0.177211	0.0498722	Q08AD1-2	Isoform 2 of Calmodulin-regulated spectrin-associated protein 2 OS=Homo sapiens OX=9606 GN=CAMSAP20	unknown	NUCLEUS	0.712007	unknown
Q9H0U3	0.045217	0.201689	0.158342	0.260108	0.188267	0.0886462	0.0372958	0.00753617	0.00797624	0.00492326	0.0591019	0.125256	0.173734	0.21171	0.203071	0.124981	0.0847147	0.00790671	0.00576976	0.00375492	0.0690661	0.124149	0.16537	0.180934	0.201119	0.142875	0.0834144	0.0162938	0.00340467	0.0133755	Q9H0U3	Magnesium transporter protein 1 OS=Homo sapiens OX=9606 GN=MAGT1 PE=1 SV=10	unknown	ER	0.950291	ER
A0A087X295	0.0252401	0.0928449	0.0545008	0.101109	0.0985035	0.0842826	0.0742313	0.13521	0.148239	0.185839	0.0387779	0.0510884	0.0714565	0.0664205	0.0858933	0.102456	0.112417	0.143585	0.113704	0.214202	0.0358812	0.0451643	0.0650471	0.0679439	0.0817039	0.109158	0.092962	0.140233	0.108368	0.253539	A0A087X295	WD repeat-containing protein 6 OS=Homo sapiens OX=9606 GN=WDR6 PE=1 SV=10	unknown	CYTOSOL	0.61042	unknown
Q71UM5	0.0270806	0.102104	0.0723201	0.10999	0.112243	0.109764	0.0990853	0.151669	0.179111	0.0366332	0.0224316	0.0400404	0.0466577	0.0506954	0.0648273	0.0970166	0.0789592	0.317631	0.187528	0.0942127	0.0219362	0.0348089	0.0629187	0.0446604	0.0841981	0.133981	0.110469	0.184684	0.197557	0.124787	Q71UM5	40S ribosomal protein S27-like OS=Homo sapiens OX=9606 GN=RPS27L PE=1 SV=30	unknown	NUCLEUS	0.733244	unknown
Q6WKZ4	0.0663801	0.158376	0.0663216	0.157792	0.16788	0.141855	0.115595	0.0731643	0.0368746	0.0157616	0.0834707	0.0907934	0.0787766	0.110195	0.1645	0.144785	0.186823	0.0862454	0.0389293	0.0154799	0.0797698	0.0855387	0.0835224	0.107536	0.171763	0.172912	0.146854	0.0872749	0.0321768	0.0326528	Q6WKZ4	Rab11 family-interacting protein 1 OS=Homo sapiens OX=9606 GN=RAB11FIP1 PE=1 SV=30	unknown	NUCLEUS	0.285387	unknown
Q3LXA3	0.035297	0.0938384	0.0730537	0.0927315	0.0960521	0.0857213	0.0638298	0.0455049	0.0597712	0.3542	0.0415099	0.0565012	0.0814072	0.0604432	0.100878	0.0876187	0.0868423	0.0608015	0.0455116	0.378487	0.0325858	0.0505978	0.055091	0.0592326	0.07197	0.0922482	0.0459483	0.068688	0.0495038	0.474135	Q3LXA3	Triokinase/FMN cyclase OS=Homo sapiens OX=9606 GN=TKFC PE=1 SV=20	unknown	CYTOSOL	0.853145	unknown
Q9H410	0.0757355	0.140398	0.0591659	0.104025	0.110653	0.0820401	0.0715325	0.149855	0.127869	0.0787262	0.0868078	0.0748955	0.0652009	0.066278	0.0939044	0.11285	0.109682	0.174059	0.12717	0.0891522	0.0941666	0.0681751	0.0624553	0.0609833	0.0990874	0.114691	0.085671	0.153341	0.115784	0.145645	Q9H410	Kinetochore-associated protein DSN1 homolog OS=Homo sapiens OX=9606 GN=DSN1 PE=1 SV=20	unknown	NUCLEUS	0.876848	NUCLEUS
P13667	0.0362599	0.237773	0.154176	0.281859	0.166459	0.0773036	0.0229423	0.00486208	0.00500973	0.0133553	0.0497718	0.13234	0.185828	0.229352	0.206686	0.101726	0.0630104	0.00948486	0.00476947	0.0170312	0.0583195	0.122501	0.16198	0.197552	0.194198	0.144337	0.063617	0.0176566	0.00861149	0.0312277	P13667	Protein disulfide-isomerase A4 OS=Homo sapiens OX=9606 GN=PDIA4 PE=1 SV=20	ER	ER	1	ER
P18669	0.0349904	0.106698	0.0603586	0.102084	0.108451	0.0823187	0.0546393	0.0345138	0.0497833	0.366162	0.0489284	0.0829184	0.129038	0.0901907	0.140677	0.1279	0.0960453	0.088633	0.0570321	0.138638	0.0430745	0.0691684	0.0902601	0.0913717	0.123445	0.166386	0.0726182	0.103082	0.0569983	0.183596	P18669	Phosphoglycerate mutase 1 OS=Homo sapiens OX=9606 GN=PGAM1 PE=1 SV=20	unknown	CYTOSOL	0.889847	CYTOSOL
Q13753	0.0399975	0.234681	0.142955	0.253338	0.168102	0.0728192	0.0318233	0.0215275	0.0215899	0.0131661	0.0663651	0.126462	0.164653	0.201422	0.186171	0.100485	0.0756704	0.0323102	0.0282391	0.0182229	0.0662139	0.130051	0.187606	0.187436	0.20781	0.128183	0.0495756	0.0142615	0.0196944	0.00916808	Q13753	Laminin subunit gamma-2 OS=Homo sapiens OX=9606 GN=LAMC2 PE=1 SV=20	unknown	ER	0.848053	unknown
Q9Y4H2	0.0264857	0.0801192	0.053468	0.0801192	0.0986592	0.069856	0.0898858	0.240026	0.210727	0.0506539	0.0530743	0.0549375	0.0676071	0.0733564	0.103806	0.0830982	0.133937	0.228906	0.164599	0.0366782	0.0359741	0.0391193	0.0471791	0.057991	0.0786318	0.109495	0.1207	0.242383	0.198349	0.0701789	Q9Y4H2	Insulin receptor substrate 2 OS=Homo sapiens OX=9606 GN=IRS2 PE=1 SV=20	unknown	NUCLEUS	0.909901	NUCLEUS
Q7Z333	0.133517	0.11343	0.0360378	0.0740449	0.0886176	0.0712879	0.0868452	0.197913	0.17822	0.0200866	0.16389	0.0756031	0.0606814	0.056951	0.0803283	0.0783387	0.104452	0.201442	0.147476	0.0308381	0.131363	0.0786809	0.0424193	0.0477559	0.0859332	0.102901	0.107964	0.189108	0.170772	0.0431034	Q7Z333	Probable helicase senataxin OS=Homo sapiens OX=9606 GN=SETX PE=1 SV=40	unknown	NUCLEUS	0.973045	NUCLEUS
P41208	0.0453151	0.086133	0.0756309	0.0776943	0.102058	0.0899423	0.103328	0.155071	0.145627	0.1192	0.0727626	0.0668904	0.0863614	0.0836682	0.12133	0.115436	0.124244	0.151243	0.105082	0.0729834	0.0674623	0.070155	0.0649152	0.0660068	0.107052	0.115494	0.10334	0.163962	0.105887	0.135725	P41208	Centrin-2 OS=Homo sapiens OX=9606 GN=CETN2 PE=1 SV=10	unknown	NUCLEUS	0.799863	unknown
F5H5D3	0.0333722	0.0789673	0.0666834	0.0740066	0.0981439	0.0834178	0.0742286	0.0430258	0.0826975	0.365457	0.0338124	0.0525144	0.0742532	0.0620987	0.101741	0.0969301	0.0843781	0.0602508	0.0497472	0.384274	0.0337665	0.0467073	0.060863	0.0587062	0.0753242	0.102231	0.0489956	0.0675073	0.0573709	0.448528	F5H5D3	Tubulin alpha chain OS=Homo sapiens OX=9606 GN=TUBA1C PE=1 SV=10	unknown	CYTOSOL	0.871382	CYTOSOL
Q8NBM4	0.0489537	0.17324	0.142232	0.263729	0.205961	0.103171	0.0476221	0.00697527	0.00443881	0.00367787	0.0567443	0.114584	0.155043	0.195209	0.204338	0.131454	0.0885124	0.0223472	0.0115387	0.0202293	0.0575944	0.0936042	0.13497	0.177662	0.22884	0.162123	0.0900509	0.0344718	0.0119856	0.0086975	Q8NBM4	Ubiquitin-associated domain-containing protein 2 OS=Homo sapiens OX=9606 GN=UBAC2 PE=1 SV=10	ER	ER	1	ER
O15347	0.201813	0.241648	0.0609913	0.0951124	0.0836393	0.0609454	0.0436898	0.0829279	0.0779486	0.051285	0.272324	0.116775	0.0700648	0.0766485	0.0774975	0.0645553	0.0764233	0.101268	0.078537	0.0659066	0.249814	0.132063	0.0656956	0.0553245	0.0703816	0.0708902	0.0706904	0.104546	0.0773562	0.103238	O15347	High mobility group protein B3 OS=Homo sapiens OX=9606 GN=HMGB3 PE=1 SV=40	NUCLEUS-CHROMATIN	NUCLEUS-CHROMATIN	1	NUCLEUS-CHROMATIN
P51668	0.0481681	0.105304	0.0778888	0.123495	0.11094	0.0602101	0.0825006	0.0663592	0.0591852	0.265949	0.0481423	0.0717074	0.0747434	0.074888	0.0967182	0.0841405	0.0915137	0.0732977	0.0359983	0.348851	0.0459101	0.0746848	0.0526996	0.0733915	0.086324	0.0924669	0.0772713	0.115422	0.0569027	0.324927	P51668	Ubiquitin-conjugating enzyme E2 D1 OS=Homo sapiens OX=9606 GN=UBE2D1 PE=1 SV=10.001	unknown	CYTOSOL	0.855022	unknown
P63146	0.0379747	0.0734177	0.0405063	0.0974684	0.0924051	0.0797468	0.0594937	0.0860759	0.117722	0.31519	0.04654	0.056737	0.0812271	0.073209	0.109988	0.0941258	0.0893324	0.0745163	0.0764337	0.297891	0.0395805	0.0490528	0.0564953	0.0537889	0.0899865	0.101488	0.0663058	0.0781461	0.088295	0.376861	P63146	Ubiquitin-conjugating enzyme E2 B OS=Homo sapiens OX=9606 GN=UBE2B PE=1 SV=10	unknown	CYTOSOL	0.883144	CYTOSOL
Q9NRZ9	0.103802	0.124863	0.041849	0.0946389	0.0878009	0.0713895	0.0772702	0.192697	0.193107	0.0125821	0.119351	0.0742622	0.0562665	0.0655443	0.0868592	0.0775814	0.114752	0.222587	0.154583	0.0282132	0.137741	0.0791346	0.0402775	0.0582378	0.0884221	0.101944	0.107598	0.207807	0.150525	0.0283131	Q9NRZ9	Lymphoid-specific helicase OS=Homo sapiens OX=9606 GN=HELLS PE=1 SV=10	unknown	NUCLEUS	0.977678	NUCLEUS
Q9BZD4	0.0409934	0.100506	0.0494715	0.0948437	0.0970383	0.086407	0.0775251	0.219925	0.196064	0.0372253	0.0491697	0.0513276	0.0580758	0.0590076	0.0779673	0.0875305	0.12392	0.250213	0.189058	0.0537306	0.0550115	0.0490646	0.0474965	0.0564218	0.0818466	0.106078	0.1095	0.220076	0.186682	0.0878231	Q9BZD4	Kinetochore protein Nuf2 OS=Homo sapiens OX=9606 GN=NUF2 PE=1 SV=20	NUCLEUS	NUCLEUS	1	NUCLEUS
G3V5R9	0.0435711	0.116888	0.0630813	0.102262	0.0994862	0.0923067	0.066898	0.130887	0.132715	0.151905	0.0610241	0.067422	0.0728655	0.0696055	0.102251	0.0980524	0.111062	0.150266	0.119941	0.14751	0.0450264	0.0518136	0.0578186	0.0634218	0.0846399	0.115901	0.0603981	0.104568	0.0998213	0.316591	G3V5R9	Kinesin light chain 1 OS=Homo sapiens OX=9606 GN=KLC1 PE=1 SV=10	unknown	CYTOSOL	0.565378	unknown
P13798	0.0380962	0.0908041	0.0750377	0.0887538	0.106158	0.084441	0.0745664	0.0513881	0.0620287	0.328726	0.0507242	0.0817385	0.116494	0.0961824	0.146094	0.131089	0.11857	0.0823102	0.0646064	0.112191	0.0505364	0.0738257	0.0932461	0.0863993	0.109396	0.158291	0.0724385	0.108098	0.081436	0.166334	P13798	Acylamino-acid-releasing enzyme OS=Homo sapiens OX=9606 GN=APEH PE=1 SV=40	CYTOSOL	CYTOSOL	1	CYTOSOL
P04066	0.0497896	0.354064	0.243818	0.221082	0.0713442	0.0228833	0.0109618	0.0081937	0.00811988	0.00974385	0.0627451	0.288917	0.28133	0.185763	0.0826939	0.0341006	0.0289855	0.0110827	0.00716113	0.0172208	0.0856565	0.257854	0.233453	0.181175	0.0833175	0.0491181	0.0193438	0.024085	0.0172577	0.0487389	P04066	Tissue alpha-L-fucosidase OS=Homo sapiens OX=9606 GN=FUCA1 PE=1 SV=40	LYSOSOME	LYSOSOME	1	LYSOSOME
Q16778	0.487484	0.3307	0.015075	0.0300023	0.0311498	0.0202261	0.0162178	0.0332207	0.0294015	0.00652271	0.631482	0.151721	0.0192645	0.041991	0.0392131	0.0223653	0.0257726	0.0341993	0.0236105	0.0103807	0.593697	0.227894	0.0265101	0.0240516	0.0333919	0.0257621	0.0175288	0.0185436	0.0125918	0.0200297	Q16778	Histone H2B type 2-E OS=Homo sapiens OX=9606 GN=HIST2H2BE PE=1 SV=30	NUCLEUS-CHROMATIN	NUCLEUS-CHROMATIN	1	NUCLEUS-CHROMATIN
Q9H2H9	0.103988	0.143873	0.110321	0.167093	0.178536	0.117654	0.125319	0.0441062	0.00844351	0.000666593	0.095574	0.138734	0.122428	0.124693	0.121328	0.135175	0.183512	0.0559726	0.00841206	0.0141711	0.166106	0.169976	0.119264	0.12033	0.132784	0.11371	0.0908785	0.0641759	0.0123976	0.0103781	Q9H2H9	Sodium-coupled neutral amino acid transporter 1 OS=Homo sapiens OX=9606 GN=SLC38A1 PE=1 SV=10.001	unknown	PM	0.627986	unknown
P61204	0.0590215	0.135967	0.109387	0.112968	0.125941	0.0975524	0.107718	0.0454767	0.0739123	0.132057	0.0602552	0.100454	0.120144	0.100962	0.134296	0.174661	0.144012	0.0500233	0.0476266	0.067566	0.060807	0.0884517	0.109981	0.10951	0.136008	0.148694	0.0659952	0.0772418	0.0635922	0.13972	P61204	ADP-ribosylation factor 3 OS=Homo sapiens OX=9606 GN=ARF3 PE=1 SV=20	unknown	CYTOSOL	0.411045	unknown
E7ENY0	0.0940818	0.140296	0.057463	0.0966928	0.0976501	0.0826371	0.0818103	0.160901	0.128568	0.0598999	0.0974107	0.0895377	0.0741223	0.0661327	0.0957	0.086719	0.122079	0.179348	0.123945	0.0650052	0.084479	0.076239	0.0597886	0.062075	0.0869436	0.114143	0.0963269	0.158402	0.116905	0.144698	E7ENY0	Alpha-adducin OS=Homo sapiens OX=9606 GN=ADD1 PE=1 SV=10	unknown	NUCLEUS	0.942221	NUCLEUS
Q9BZE4	0.0791289	0.0951079	0.0411126	0.0786629	0.0861398	0.065832	0.0803923	0.254515	0.200385	0.0187233	0.11188	0.0591198	0.0518382	0.0570667	0.0720132	0.0759278	0.130832	0.229252	0.190244	0.0218266	0.0931721	0.0579132	0.0331887	0.0457051	0.0650047	0.0761777	0.0758253	0.304615	0.233033	0.0153647	Q9BZE4	Nucleolar GTP-binding protein 1 OS=Homo sapiens OX=9606 GN=GTPBP4 PE=1 SV=30	NUCLEUS	NUCLEUS	1	NUCLEUS
H7BXI1	0.0550288	0.190297	0.117081	0.235102	0.187852	0.100024	0.0498919	0.0315066	0.0243771	0.00883937	0.0686314	0.110571	0.138556	0.178682	0.195015	0.129059	0.10375	0.0411075	0.0213117	0.0133161	0.0821906	0.109538	0.116822	0.150009	0.180709	0.159397	0.0951272	0.0618911	0.0282128	0.0161019	H7BXI1	Extended synaptotagmin-2 (Fragment) OS=Homo sapiens OX=9606 GN=ESYT2 PE=1 SV=10	unknown	ER	0.854368	unknown
Q96DI7	0.0766878	0.0924258	0.0389278	0.0711267	0.0813035	0.0790791	0.0979869	0.222055	0.208709	0.0316984	0.0929956	0.0391631	0.0412201	0.0435477	0.0724261	0.0733193	0.13381	0.292438	0.185423	0.0256577	0.086888	0.0481968	0.0316456	0.0345594	0.0537378	0.073776	0.087915	0.294411	0.246238	0.042632	Q96DI7	U5 small nuclear ribonucleoprotein 40 kDa protein OS=Homo sapiens OX=9606 GN=SNRNP40 PE=1 SV=10	unknown	NUCLEUS	0.96168	NUCLEUS
P14174	0.0144928	0.0848094	0.0386473	0.0810521	0.101449	0.0558239	0.0950081	0.027912	0.057971	0.442834	0.0633803	0.0862676	0.0985915	0.0915493	0.114437	0.158451	0.114437	0.0739437	0.0352113	0.163732	0.0461216	0.0638248	0.0733753	0.0803634	0.124156	0.152807	0.0745399	0.0985325	0.0510133	0.235267	P14174	Macrophage migration inhibitory factor OS=Homo sapiens OX=9606 GN=MIF PE=1 SV=40	unknown	CYTOSOL	0.761605	unknown
Q99459	0.0890323	0.0975302	0.0368291	0.0616756	0.0668444	0.0621121	0.0759582	0.282611	0.215198	0.0122088	0.0920656	0.0467288	0.0417775	0.0476478	0.0663489	0.0614388	0.119661	0.301118	0.201516	0.021698	0.0656838	0.0479811	0.0350657	0.0495614	0.0868509	0.102078	0.120187	0.272511	0.197365	0.0227165	Q99459	Cell division cycle 5-like protein OS=Homo sapiens OX=9606 GN=CDC5L PE=1 SV=20	unknown	NUCLEUS	0.952264	NUCLEUS
cRAP087	0.0771217	0.193611	0.10697	0.195063	0.134237	0.0822846	0.0619555	0.0371087	0.0392062	0.0724427	0.094873	0.143035	0.249099	0.101422	0.108053	0.0746881	0.0804078	0.057819	0.0298421	0.0607618	0.0912088	0.112408	0.128638	0.112167	0.10905	0.113401	0.0687755	0.0645749	0.04711	0.152667	cRAP087	Serum albumin OS=Bos taurus GN=ALB PE=1 SV=40	unknown	GOLGI	0.180613	unknown
P43487	0.0337539	0.113667	0.0666471	0.102773	0.119041	0.0853502	0.0545771	0.0581666	0.062113	0.303911	0.066963	0.0781414	0.0963943	0.0805779	0.135828	0.121017	0.111484	0.100519	0.0734178	0.135657	0.0594882	0.0757241	0.0782894	0.0908235	0.11469	0.148055	0.0734511	0.11685	0.0704312	0.172198	P43487	Ran-specific GTPase-activating protein OS=Homo sapiens OX=9606 GN=RANBP1 PE=1 SV=10	unknown	CYTOSOL	0.901323	CYTOSOL
Q7Z4H8	0.0403657	0.178579	0.16348	0.274739	0.177293	0.0866765	0.0360012	0.0130109	0.0119729	0.0178826	0.0492868	0.13012	0.179177	0.218161	0.201732	0.101133	0.0687468	0.0153974	0.010596	0.0256495	0.0603929	0.113941	0.15844	0.178822	0.184969	0.140131	0.0708575	0.0268685	0.0149333	0.0506448	Q7Z4H8	KDEL motif-containing protein 2 OS=Homo sapiens OX=9606 GN=KDELC2 PE=1 SV=20	ER	ER	1	ER
O60784	0.054242	0.121001	0.10153	0.11822	0.109875	0.0848401	0.077886	0.0869263	0.141168	0.104312	0.0585456	0.0972686	0.120549	0.109254	0.139219	0.115708	0.107987	0.072721	0.0463294	0.132419	0.0835768	0.10335	0.112183	0.097846	0.0987294	0.0890807	0.0786166	0.086023	0.0547666	0.195828	O60784	Target of Myb protein 1 OS=Homo sapiens OX=9606 GN=TOM1 PE=1 SV=20	unknown	CYTOSOL	0.395535	unknown
Q7Z2T5	0.0316162	0.0795556	0.0402828	0.0837374	0.0885859	0.0611313	0.0674545	0.219535	0.270788	0.0573131	0.0404853	0.0414585	0.043924	0.0447025	0.0690326	0.0748719	0.0923895	0.24382	0.234023	0.115292	0.0440994	0.0375079	0.0333434	0.0448165	0.0728371	0.105463	0.0922254	0.221876	0.240051	0.10778	Q7Z2T5	TRMT1-like protein OS=Homo sapiens OX=9606 GN=TRMT1L PE=1 SV=20	unknown	NUCLEUS	0.887037	NUCLEUS
Q05086	0.0316822	0.0805907	0.0583861	0.0815489	0.0874854	0.083007	0.053262	0.119459	0.23067	0.173909	0.0332356	0.0552472	0.0671364	0.0515267	0.0790672	0.0808963	0.0735175	0.122675	0.186007	0.250691	0.0300239	0.0408055	0.0394759	0.0522639	0.0640607	0.0873643	0.0409505	0.120845	0.263012	0.261199	Q05086	Ubiquitin-protein ligase E3A OS=Homo sapiens OX=9606 GN=UBE3A PE=1 SV=40	unknown	PROTEASOME	0.653745	PROTEASOME
Q9BV40	0.0504622	0.125759	0.110604	0.166858	0.183957	0.157853	0.128853	0.0528821	0.0131709	0.00960051	0.0763487	0.104066	0.135706	0.123778	0.162316	0.17029	0.144218	0.069451	0.00759374	0.00623319	0.069615	0.0991251	0.122321	0.11293	0.196725	0.193622	0.116542	0.0682505	0.0110496	0.00981887	Q9BV40	Vesicle-associated membrane protein 8 OS=Homo sapiens OX=9606 GN=VAMP8 PE=1 SV=10	unknown	NUCLEUS	0.210982	unknown
P09486	0.0413974	0.177363	0.169333	0.242258	0.176867	0.0900889	0.0540022	0.0237539	0.0136125	0.0113251	0.0592065	0.129169	0.16897	0.214771	0.196259	0.115062	0.0854745	0.0134372	0.00497909	0.0126712	0.0584829	0.12623	0.151403	0.185414	0.195197	0.148996	0.0666199	0.0221254	0.0115808	0.03395	P09486	SPARC OS=Homo sapiens OX=9606 GN=SPARC PE=1 SV=10	unknown	ER	0.931058	ER
Q9BRZ2	0.0333683	0.0907319	0.0437163	0.0722855	0.0932813	0.0712358	0.069811	0.258623	0.240702	0.0262448	0.0363923	0.0498869	0.054122	0.0601515	0.0875713	0.0836234	0.13107	0.27969	0.192011	0.0254818	0.0302854	0.0424249	0.0538801	0.0674388	0.10814	0.126768	0.130645	0.236961	0.139262	0.0641948	Q9BRZ2	E3 ubiquitin-protein ligase TRIM56 OS=Homo sapiens OX=9606 GN=TRIM56 PE=1 SV=30	unknown	NUCLEUS	0.910081	NUCLEUS
Q16891-2	0.295038	0.533759	0.0969276	0.0259502	0.0127799	0.00814393	0.00537376	0.00701111	0.00830577	0.00671125	0.289062	0.507942	0.127829	0.0265028	0.0123043	0.00900417	0.00665923	0.00791487	0.00464697	0.00813488	0.343001	0.445057	0.124314	0.0258498	0.0161111	0.0117905	0.0074658	0.00876403	0.00608158	0.0115652	Q16891-2	Isoform 2 of MICOS complex subunit MIC60 OS=Homo sapiens OX=9606 GN=IMMT0	unknown	MITOCHONDRIA	0.942898	unknown
Q14244	0.021708	0.0850652	0.0439209	0.0732857	0.0730332	0.0575515	0.0768195	0.307531	0.252419	0.00866639	0.0484239	0.0541783	0.0525859	0.0698853	0.0847599	0.0773045	0.126344	0.262966	0.210995	0.0125584	0.034595	0.0408363	0.0513129	0.0580893	0.103473	0.126343	0.124025	0.251393	0.16446	0.0454728	Q14244	Ensconsin OS=Homo sapiens OX=9606 GN=MAP7 PE=1 SV=10	unknown	NUCLEUS	0.910224	NUCLEUS
O15118	0.0424729	0.289961	0.199565	0.236638	0.127219	0.0513974	0.0313734	0.0120244	0.00674966	0.00259987	0.0540417	0.226175	0.26768	0.193026	0.118056	0.0614861	0.0445256	0.0161528	0.00856802	0.0102886	0.0762743	0.209329	0.256423	0.196278	0.123348	0.073463	0.0392555	0.0146926	0.00508906	0.00584831	O15118	NPC intracellular cholesterol transporter 1 OS=Homo sapiens OX=9606 GN=NPC1 PE=1 SV=20	unknown	LYSOSOME	0.575688	unknown
Q9BR61	0.0389908	0.0821101	0.0706422	0.0844037	0.130505	0.0885321	0.0922018	0.0422018	0.0770642	0.293349	0.0311712	0.0757711	0.0951412	0.0761781	0.125254	0.145682	0.0965248	0.0571336	0.0545292	0.242614	0.0385308	0.0560916	0.0770616	0.0715297	0.0964878	0.132253	0.0654188	0.0714653	0.0700502	0.321112	Q9BR61	Acyl-CoA-binding domain-containing protein 6 OS=Homo sapiens OX=9606 GN=ACBD6 PE=1 SV=10	unknown	CYTOSOL	0.909573	CYTOSOL
Q9Y3M8	0.0259701	0.0829924	0.0447048	0.0894957	0.0915199	0.0696843	0.0760153	0.238555	0.239761	0.0413024	0.0318474	0.047771	0.0559324	0.0677573	0.0977185	0.0893395	0.127535	0.232145	0.201241	0.0487141	0.0369494	0.0448718	0.05	0.065549	0.0867193	0.112985	0.0940171	0.207068	0.183728	0.118113	Q9Y3M8	StAR-related lipid transfer protein 13 OS=Homo sapiens OX=9606 GN=STARD13 PE=1 SV=20	unknown	NUCLEUS	0.951401	NUCLEUS
Q9Y2H0-1	0.0444107	0.148245	0.0748025	0.118795	0.124549	0.107287	0.0706178	0.0456662	0.0363551	0.229272	0.0636345	0.102884	0.121926	0.104185	0.109597	0.146106	0.129461	0.0382903	0.0453456	0.138571	0.0586392	0.0820845	0.0876194	0.0921623	0.110595	0.141141	0.0600491	0.0697092	0.0461073	0.251893	Q9Y2H0-1	Isoform 2 of Disks large-associated protein 4 OS=Homo sapiens OX=9606 GN=DLGAP40	unknown	CYTOSOL	0.828403	unknown
Q9H147	0.219902	0.207167	0.0462743	0.0734061	0.0696092	0.0479355	0.0539472	0.129568	0.111849	0.0403417	0.262969	0.106147	0.0722639	0.0692654	0.0698651	0.0716642	0.0761619	0.137631	0.10045	0.0335832	0.30261	0.15314	0.0499592	0.0511827	0.072186	0.0776917	0.0607667	0.0991028	0.0642333	0.0691272	Q9H147	Deoxynucleotidyltransferase terminal-interacting protein 1 OS=Homo sapiens OX=9606 GN=DNTTIP1 PE=1 SV=20	unknown	NUCLEUS-CHROMATIN	0.897489	NUCLEUS-CHROMATIN
Q15464	0.0622544	0.171872	0.0535677	0.118511	0.093485	0.0771458	0.0725957	0.179317	0.147673	0.0235781	0.0451549	0.0929466	0.0820699	0.0738299	0.095089	0.0847067	0.112393	0.205999	0.164799	0.0430125	0.0836892	0.0775406	0.0864219	0.0777114	0.0893254	0.112041	0.0956447	0.150299	0.123484	0.103843	Q15464	SH2 domain-containing adapter protein B OS=Homo sapiens OX=9606 GN=SHB PE=1 SV=20	unknown	NUCLEUS	0.914107	NUCLEUS
O14562	0.0410075	0.118409	0.0631827	0.10146	0.111158	0.0872411	0.0684557	0.114736	0.138136	0.156215	0.0644141	0.068344	0.0780107	0.0764748	0.105949	0.10229	0.11155	0.130613	0.117332	0.145022	0.0540449	0.0546762	0.0542027	0.0627706	0.0765918	0.0989132	0.0642136	0.139858	0.18387	0.210859	O14562	Ubiquitin domain-containing protein UBFD1 OS=Homo sapiens OX=9606 GN=UBFD1 PE=1 SV=20	unknown	NUCLEUS	0.432551	unknown
Q15393	0.0662969	0.0693555	0.0441956	0.0710673	0.0849533	0.0775	0.0803707	0.202201	0.206507	0.0975528	0.0637367	0.0497169	0.0572275	0.0533479	0.0843916	0.0886284	0.128321	0.219306	0.153314	0.102011	0.0644107	0.0490034	0.0455029	0.0524028	0.0738393	0.0969102	0.075964	0.185869	0.190234	0.165864	Q15393	Splicing factor 3B subunit 3 OS=Homo sapiens OX=9606 GN=SF3B3 PE=1 SV=40	unknown	NUCLEUS	0.948167	NUCLEUS
P41227	0.028841	0.103481	0.0617297	0.120932	0.135842	0.123583	0.104893	0.144828	0.107051	0.0688187	0.0328452	0.0496691	0.0622776	0.0729838	0.117003	0.106512	0.152585	0.212467	0.0911854	0.102473	0.0292499	0.0376576	0.0499914	0.061592	0.101828	0.128689	0.140703	0.18085	0.0957967	0.173643	P41227	N-alpha-acetyltransferase 10 OS=Homo sapiens OX=9606 GN=NAA10 PE=1 SV=10	unknown	NUCLEUS	0.491083	unknown
Q8NBI6	0.0483487	0.18153	0.142741	0.259579	0.187895	0.0992902	0.0481391	0.0190671	0.00796208	0.00544774	0.0628814	0.124258	0.164134	0.202184	0.185078	0.129566	0.0993086	0.0183742	0.00689667	0.00731926	0.0683805	0.116488	0.144133	0.178725	0.195643	0.159397	0.0809981	0.0307641	0.0133264	0.012145	Q8NBI6	Xyloside xylosyltransferase 1 OS=Homo sapiens OX=9606 GN=XXYLT1 PE=1 SV=10	unknown	ER	0.938837	ER
L0R6Q1	0.269205	0.490982	0.0906814	0.0437542	0.0282231	0.0156981	0.0143621	0.0183701	0.0165331	0.012191	0.276814	0.509356	0.114712	0.0160505	0.0205386	0.0143009	0.0120189	0.011106	0.00836756	0.0167351	0.356068	0.427404	0.134113	0.0153863	0.0151066	0.0127567	0.00861635	0.0106306	0.00744139	0.0124769	L0R6Q1	SLC35A4 upstream open reading frame protein OS=Homo sapiens OX=9606 GN=SLC35A4 PE=3 SV=10	unknown	MITOCHONDRIA	0.942862	unknown
A0A0J9YVP6	0.0512008	0.0604534	0.0454601	0.0689534	0.0889779	0.0845344	0.129285	0.251331	0.191308	0.0284959	0.0625809	0.0504777	0.0530277	0.0612107	0.0882907	0.0948276	0.150443	0.229866	0.169464	0.0398112	0.0686357	0.0461193	0.0388136	0.0470434	0.0773525	0.107674	0.11739	0.249666	0.185339	0.0619669	A0A0J9YVP6	Poly(U)-binding-splicing factor PUF60 (Fragment) OS=Homo sapiens OX=9606 GN=PUF60 PE=1 SV=10	unknown	NUCLEUS	0.895703	NUCLEUS
Q8NHP6	0.0471217	0.183858	0.128309	0.284332	0.218338	0.0778042	0.0349555	0.0147181	0.00824926	0.00231454	0.078737	0.115937	0.140873	0.187966	0.189863	0.121222	0.0912048	0.0312373	0.0283236	0.0146361	0.0878254	0.110411	0.119647	0.167422	0.185894	0.156843	0.0758186	0.0439127	0.0218304	0.0303946	Q8NHP6	Motile sperm domain-containing protein 2 OS=Homo sapiens OX=9606 GN=MOSPD2 PE=1 SV=10	ER	ER	1	ER
A0A0A0MRM9	0.147654	0.129752	0.0548694	0.089942	0.0872658	0.0692808	0.0496501	0.10063	0.135171	0.135786	0.142469	0.0781658	0.071054	0.0726462	0.105636	0.0845982	0.0922832	0.095043	0.0986519	0.159452	0.102758	0.0693153	0.049926	0.0496619	0.0794062	0.0931424	0.0585376	0.138049	0.13937	0.219833	A0A0A0MRM9	Nucleolar and coiled-body phosphoprotein 1 (Fragment) OS=Homo sapiens OX=9606 GN=NOLC1 PE=1 SV=10	unknown	NUCLEUS-CHROMATIN	0.528634	unknown
U3KQ69	0.175597	0.572547	0.0693442	0.0295882	0.0260295	0.0248094	0.0223691	0.0252161	0.031215	0.0232842	0.277983	0.421369	0.0941258	0.0215079	0.0323774	0.0300648	0.0228955	0.0346901	0.0307586	0.0342276	0.305953	0.329453	0.101319	0.03381	0.0303736	0.0353619	0.0238333	0.0447844	0.0426782	0.0524332	U3KQ69	Mitochondrial GTPase 1 OS=Homo sapiens OX=9606 GN=MTG1 PE=3 SV=10	unknown	MITOCHONDRIA	0.900245	unknown
A0A087WYR0	0.033532	0.146722	0.0865509	0.142472	0.124747	0.118943	0.0623996	0.0757709	0.115781	0.0930811	0.0492931	0.0661204	0.0858877	0.090329	0.119229	0.100463	0.0853872	0.103903	0.1141	0.185287	0.0424863	0.0597678	0.0930328	0.0915984	0.115984	0.107855	0.076776	0.0927596	0.114959	0.204781	A0A087WYR0	Signal recognition particle 19 kDa protein OS=Homo sapiens OX=9606 GN=SRP19 PE=1 SV=10	unknown	CYTOSOL	0.48648	unknown
F5H269	0.0248943	0.0893612	0.0514326	0.080202	0.07938	0.0662283	0.0568342	0.243072	0.274307	0.0342884	0.0298851	0.0464879	0.0630907	0.053129	0.0750958	0.0735632	0.0932312	0.295785	0.220562	0.0491699	0.0343024	0.0500692	0.0662975	0.0516844	0.0637594	0.0699123	0.0628365	0.260037	0.286725	0.0543762	F5H269	DmX-like protein 1 OS=Homo sapiens OX=9606 GN=DMXL1 PE=1 SV=10	unknown	NUCLEUS	0.857249	unknown
Q96S44	0.0306533	0.11936	0.0553986	0.112253	0.126809	0.105488	0.0592516	0.105317	0.101122	0.184348	0.0429462	0.0632857	0.0823914	0.0801574	0.103731	0.10163	0.1121	0.141376	0.0914941	0.180888	0.0396076	0.047594	0.0518101	0.0645397	0.094823	0.122106	0.0916204	0.139579	0.101066	0.247253	Q96S44	TP53-regulating kinase OS=Homo sapiens OX=9606 GN=TP53RK PE=1 SV=20	unknown	CYTOSOL	0.743295	unknown
P98173	0.0819495	0.354657	0.142238	0.153863	0.100361	0.0503971	0.0400722	0.0511191	0.0200722	0.00527076	0.0905556	0.222501	0.166249	0.130649	0.106195	0.0781128	0.106368	0.0652381	0.0199603	0.0141709	0.0861393	0.199216	0.19992	0.131169	0.114484	0.0828224	0.0485476	0.0723691	0.040004	0.0253292	P98173	Protein FAM3A OS=Homo sapiens OX=9606 GN=FAM3A PE=1 SV=20	unknown	GOLGI	0.689492	GOLGI
P21964	0.0426679	0.142291	0.145279	0.18418	0.164242	0.136251	0.0690999	0.0273412	0.0216911	0.0669567	0.0544289	0.0956184	0.129032	0.155774	0.178102	0.136913	0.101187	0.0323106	0.0226437	0.0939897	0.052548	0.0868651	0.10524	0.133535	0.152303	0.146982	0.074553	0.0521355	0.030873	0.164965	P21964	Catechol O-methyltransferase OS=Homo sapiens OX=9606 GN=COMT PE=1 SV=20	unknown	ER	0.309243	unknown
J3QR07	0.0430231	0.0780907	0.0322412	0.0597718	0.0696116	0.0732754	0.0699257	0.293416	0.249764	0.0308804	0.0646356	0.0387635	0.0507182	0.0525471	0.0628513	0.0631635	0.105406	0.27014	0.231287	0.0604871	0.0744353	0.0390144	0.0482546	0.0610883	0.0698152	0.0549281	0.0415811	0.171458	0.246407	0.193018	J3QR07	YTH domain-containing protein 1 OS=Homo sapiens OX=9606 GN=YTHDC1 PE=1 SV=10	unknown	NUCLEUS	0.800968	unknown
Q8IWR0	0.0426485	0.129698	0.0715482	0.153885	0.177449	0.152989	0.136319	0.0952678	0.027887	0.0123077	0.0334253	0.0724749	0.0868886	0.116315	0.165843	0.152542	0.213319	0.119843	0.0326554	0.00669361	0.0317815	0.0488728	0.0593536	0.102181	0.165998	0.212724	0.227442	0.11834	0.0181931	0.0151138	Q8IWR0	Zinc finger CCCH domain-containing protein 7A OS=Homo sapiens OX=9606 GN=ZC3H7A PE=1 SV=10	unknown	NUCLEUS	0.293155	unknown
Q7LG56	0.0483061	0.0850063	0.0787327	0.0915935	0.102572	0.0925345	0.0925345	0.0410916	0.101945	0.265684	0.041535	0.073702	0.0863431	0.0679458	0.121332	0.135779	0.0940181	0.065237	0.0538375	0.260271	0.0242576	0.0476788	0.0635717	0.0761188	0.0961941	0.124216	0.0455876	0.0598076	0.0861564	0.376412	Q7LG56	Ribonucleoside-diphosphate reductase subunit M2 B OS=Homo sapiens OX=9606 GN=RRM2B PE=1 SV=10	unknown	CYTOSOL	0.892759	CYTOSOL
P29350	0.0440034	0.122086	0.0608557	0.104297	0.108323	0.0794869	0.0777081	0.159348	0.139875	0.104016	0.0633532	0.0660482	0.0780208	0.0717915	0.0968854	0.0904793	0.123614	0.168058	0.143274	0.0984758	0.0524582	0.0529289	0.0549686	0.0683054	0.0935669	0.12296	0.107479	0.173849	0.138703	0.13478	P29350	Tyrosine-protein phosphatase non-receptor type 6 OS=Homo sapiens OX=9606 GN=PTPN6 PE=1 SV=10	unknown	NUCLEUS	0.901501	NUCLEUS
Q15836	0.0617639	0.154655	0.0963264	0.168606	0.171971	0.126542	0.133273	0.0606422	0.0208216	0.00539821	0.0656762	0.108977	0.122384	0.135882	0.175469	0.122384	0.180632	0.0709303	0.00806232	0.00960232	0.0897286	0.123286	0.140648	0.113656	0.167931	0.126058	0.119784	0.0936679	0.018967	0.00627371	Q15836	Vesicle-associated membrane protein 3 OS=Homo sapiens OX=9606 GN=VAMP3 PE=1 SV=30	unknown	PM	0.39708	unknown
Q8WUF5	0.0446867	0.139821	0.0729524	0.0985665	0.116603	0.083653	0.117478	0.132216	0.127599	0.0664244	0.0657213	0.068834	0.0764054	0.0638893	0.118599	0.105018	0.109981	0.159606	0.115711	0.116235	0.0538532	0.0573694	0.0799008	0.0631289	0.104007	0.123561	0.0873214	0.155207	0.116864	0.158788	Q8WUF5	RelA-associated inhibitor OS=Homo sapiens OX=9606 GN=PPP1R13L PE=1 SV=40	unknown	NUCLEUS	0.762569	unknown
Q6P5Z2	0.060204	0.133676	0.0648406	0.119837	0.115272	0.0901633	0.0706184	0.180255	0.153363	0.0117697	0.076209	0.0985174	0.0965775	0.0906194	0.109187	0.0915893	0.111819	0.18304	0.116946	0.0254954	0.122376	0.115927	0.0914817	0.0853329	0.107828	0.110078	0.10123	0.125225	0.107229	0.0332933	Q6P5Z2	Serine/threonine-protein kinase N3 OS=Homo sapiens OX=9606 GN=PKN3 PE=1 SV=10	unknown	NUCLEUS	0.771177	unknown
P26583	0.158993	0.201583	0.0597795	0.100866	0.0868825	0.0716417	0.0581519	0.109275	0.119312	0.033515	0.185314	0.0852586	0.0690771	0.0711448	0.0863194	0.0668836	0.0862835	0.161168	0.116093	0.0724573	0.171957	0.105228	0.0629541	0.0553639	0.0790884	0.0955879	0.0849332	0.142834	0.123919	0.0781345	P26583	High mobility group protein B2 OS=Homo sapiens OX=9606 GN=HMGB2 PE=1 SV=20	NUCLEUS-CHROMATIN	NUCLEUS-CHROMATIN	1	NUCLEUS-CHROMATIN
Q9Y3Z3	0.0269875	0.087297	0.0495651	0.0885177	0.0939284	0.0771244	0.0644555	0.156811	0.168248	0.187065	0.0321137	0.0484208	0.0646798	0.0579798	0.0861178	0.0897854	0.102358	0.156294	0.125538	0.236713	0.0290916	0.0402083	0.0495602	0.0570993	0.0741821	0.108827	0.0670459	0.123368	0.105921	0.344696	Q9Y3Z3	Deoxynucleoside triphosphate triphosphohydrolase SAMHD1 OS=Homo sapiens OX=9606 GN=SAMHD1 PE=1 SV=20	unknown	CYTOSOL	0.563062	unknown
P49792	0.17636	0.155334	0.0576258	0.100283	0.0882966	0.0608059	0.0497513	0.112433	0.124605	0.0745046	0.226077	0.0895087	0.065289	0.0773844	0.0971965	0.0724783	0.0767486	0.118316	0.0989668	0.0780347	0.25294	0.125643	0.058981	0.0711186	0.0808125	0.0814594	0.049323	0.0955825	0.0950973	0.089042	P49792	E3 SUMO-protein ligase RanBP2 OS=Homo sapiens OX=9606 GN=RANBP2 PE=1 SV=20	unknown	NUCLEUS-CHROMATIN	0.874101	NUCLEUS-CHROMATIN
O75940	0.0489547	0.109198	0.0482635	0.0825318	0.0943385	0.0755054	0.0834533	0.178253	0.192536	0.0869665	0.0663309	0.0541253	0.0619464	0.0613242	0.095808	0.0878388	0.119212	0.208088	0.172063	0.0732632	0.0633788	0.0504781	0.0504781	0.0572272	0.0856299	0.111537	0.083802	0.197483	0.161031	0.138955	O75940	Survival of motor neuron-related-splicing factor 30 OS=Homo sapiens OX=9606 GN=SMNDC1 PE=1 SV=10	unknown	NUCLEUS	0.961655	NUCLEUS
M0R366	0.0761047	0.114099	0.055062	0.102993	0.110475	0.0862754	0.0700257	0.177461	0.169278	0.0382277	0.0655271	0.0826211	0.0683761	0.0655271	0.0797721	0.0512821	0.136752	0.222222	0.18661	0.0413105	0.0956754	0.0675355	0.0586493	0.0645735	0.0743483	0.0956754	0.0950829	0.200533	0.155213	0.0927133	M0R366	Fibronectin type III and SPRY domain-containing protein 1 OS=Homo sapiens OX=9606 GN=FSD1 PE=1 SV=10	unknown	NUCLEUS	0.958232	NUCLEUS
E9PHA2	0.0410159	0.0926372	0.0502635	0.0955377	0.100085	0.0854464	0.0874229	0.249229	0.188665	0.00969758	0.0475277	0.0546705	0.0619865	0.0723076	0.103258	0.0919903	0.151711	0.255735	0.146508	0.0143056	0.0493714	0.0532111	0.052057	0.0599832	0.0855544	0.103004	0.114704	0.269699	0.184428	0.0279883	E9PHA2	Condensin complex subunit 2 OS=Homo sapiens OX=9606 GN=NCAPH PE=1 SV=10	unknown	NUCLEUS	0.870869	NUCLEUS
Q96F44	0.0499401	0.0753096	0.0765082	0.0719137	0.11686	0.102877	0.119856	0.181183	0.140032	0.0655214	0.068569	0.0664395	0.0562181	0.0660136	0.122232	0.106474	0.132027	0.198893	0.118399	0.0647359	0.0497964	0.05867	0.0698403	0.0819501	0.128719	0.156488	0.13112	0.14918	0.0949995	0.0792358	Q96F44	E3 ubiquitin-protein ligase TRIM11 OS=Homo sapiens OX=9606 GN=TRIM11 PE=1 SV=20	unknown	RIBOSOME	0.520709	unknown
J3QTR3	0.108682	0.142755	0.0533998	0.139033	0.0950242	0.0433562	0.0534655	0.0570793	0.0705067	0.236699	0.122068	0.10937	0.0971587	0.0925116	0.107095	0.0959653	0.0921121	0.111777	0.0638353	0.108106	0.132156	0.0976808	0.0914726	0.0758503	0.0887545	0.085879	0.0810527	0.0858486	0.0921432	0.169162	J3QTR3	Ubiquitin-40S ribosomal protein S27a (Fragment) OS=Homo sapiens OX=9606 GN=RPS27A PE=1 SV=10	unknown	NUCLEUS-CHROMATIN	0.338477	unknown
A0A0U1RRB3	0.0467679	0.101593	0.0507501	0.0943693	0.109094	0.0926097	0.0746435	0.146416	0.165123	0.118633	0.0466329	0.059876	0.0774866	0.0728374	0.103269	0.109608	0.138067	0.148915	0.126233	0.117075	0.0561339	0.0591958	0.0665442	0.0759339	0.108185	0.117779	0.0675648	0.13513	0.12227	0.191264	A0A0U1RRB3	Cap-specific mRNA (nucleoside-2'-O-)-methyltransferase 2 OS=Homo sapiens OX=9606 GN=CMTR2 PE=1 SV=10	unknown	NUCLEUS	0.686677	unknown
Q6UW02	0.0467586	0.145496	0.170348	0.222951	0.183777	0.136126	0.0585821	0.0174006	0.0117789	0.00678178	0.0514602	0.117338	0.152071	0.20976	0.193505	0.142657	0.10229	0.0157828	0.00657906	0.00855628	0.0594168	0.103526	0.121957	0.173243	0.206743	0.173339	0.0840943	0.038888	0.0146873	0.0241053	Q6UW02	Cytochrome P450 20A1 OS=Homo sapiens OX=9606 GN=CYP20A1 PE=1 SV=10	unknown	ER	0.819468	unknown
Q9BRX5	0.032033	0.0843001	0.077003	0.0726	0.112524	0.0878126	0.0917704	0.0460089	0.0547406	0.341208	0.0447659	0.061951	0.0794585	0.0666855	0.114292	0.107926	0.0856233	0.062636	0.0516158	0.325046	0.0381635	0.0515444	0.0594893	0.0613431	0.0843555	0.120233	0.0557817	0.0701661	0.0486452	0.410278	Q9BRX5	DNA replication complex GINS protein PSF3 OS=Homo sapiens OX=9606 GN=GINS3 PE=1 SV=10	unknown	CYTOSOL	0.91518	CYTOSOL
O75165	0.0351941	0.119517	0.0988432	0.23097	0.207979	0.137586	0.090144	0.0485284	0.0253981	0.00584087	0.0434932	0.0832888	0.120044	0.16185	0.183912	0.148048	0.155137	0.0627906	0.0282949	0.0131409	0.0424497	0.0723316	0.111471	0.159931	0.19797	0.177294	0.127773	0.0641936	0.0290365	0.0175492	O75165	DnaJ homolog subfamily C member 13 OS=Homo sapiens OX=9606 GN=DNAJC13 PE=1 SV=50	unknown	ER	0.306299	unknown
A0A087WUQ6	0.160267	0.371899	0.0910751	0.0519855	0.0552369	0.044606	0.0402586	0.0228327	0.0278011	0.134037	0.167109	0.296401	0.109193	0.0592894	0.0762293	0.0546653	0.0468364	0.0307664	0.0274242	0.132085	0.193884	0.268597	0.093294	0.0625203	0.0584993	0.0797393	0.034438	0.0373241	0.0206563	0.151047	A0A087WUQ6	Glutathione peroxidase OS=Homo sapiens OX=9606 GN=GPX1 PE=1 SV=10	unknown	NUCLEUS-CHROMATIN	0.377413	unknown
Q02083	0.0486873	0.307473	0.241353	0.23149	0.0986248	0.0370885	0.0168773	0.00645923	0.00701486	0.00493124	0.0517383	0.257149	0.263423	0.199547	0.131352	0.0468011	0.0273606	0.00853734	0.00534869	0.00874306	0.116307	0.223821	0.265188	0.169664	0.103517	0.0461631	0.0319744	0.00819345	0.0107914	0.0243805	Q02083	N-acylethanolamine-hydrolyzing acid amidase OS=Homo sapiens OX=9606 GN=NAAA PE=1 SV=30	unknown	LYSOSOME	0.711872	LYSOSOME
A6NMQ1	0.0422166	0.112299	0.0706925	0.0969083	0.0968405	0.0949873	0.0713253	0.11257	0.124186	0.177974	0.0454514	0.0598553	0.0787043	0.0736733	0.0944866	0.0989662	0.103859	0.126154	0.11399	0.204859	0.0555917	0.0562017	0.0594144	0.0632371	0.0766165	0.100854	0.0504677	0.0871492	0.0880846	0.362383	A6NMQ1	DNA polymerase OS=Homo sapiens OX=9606 GN=POLA1 PE=1 SV=10	unknown	CYTOSOL	0.760022	unknown
Q14974	0.0715027	0.108221	0.0711033	0.0973754	0.112744	0.0930339	0.0652264	0.0667773	0.0806473	0.233368	0.0663433	0.0695399	0.0868174	0.0743617	0.109636	0.108449	0.10029	0.0706564	0.0599625	0.253943	0.0653795	0.0657322	0.0653291	0.0711201	0.0908073	0.119475	0.0585187	0.0855628	0.0794035	0.298671	Q14974	Importin subunit beta-1 OS=Homo sapiens OX=9606 GN=KPNB1 PE=1 SV=20	unknown	CYTOSOL	0.922756	CYTOSOL
P19367	0.135803	0.363271	0.079905	0.0628889	0.0737633	0.0607213	0.0418176	0.0499101	0.0654359	0.0664836	0.113293	0.211849	0.116988	0.0690892	0.0860806	0.0985702	0.0759823	0.0741384	0.062441	0.0915691	0.203581	0.25882	0.106828	0.0499158	0.0577354	0.0708303	0.0404875	0.0497662	0.045517	0.116518	P19367	Hexokinase-1 OS=Homo sapiens OX=9606 GN=HK1 PE=1 SV=30	unknown	NUCLEUS-CHROMATIN	0.444704	unknown
Q9H0A8	0.054902	0.130392	0.0676471	0.189216	0.146078	0.142157	0.072549	0.0656863	0.0588235	0.072549	0.0496827	0.100303	0.123882	0.148688	0.135636	0.147822	0.119628	0.0625901	0.0625901	0.049178	0.0437632	0.0898438	0.103218	0.163665	0.193194	0.172338	0.0693194	0.0515095	0.0481329	0.0650159	Q9H0A8	COMM domain-containing protein 4 OS=Homo sapiens OX=9606 GN=COMMD4 PE=1 SV=10	unknown	ER	0.18124	unknown
P50991	0.0333674	0.0864107	0.0473766	0.0843555	0.0862321	0.0719678	0.0683025	0.209871	0.244843	0.0672735	0.038387	0.0497817	0.0615331	0.0561014	0.074219	0.081108	0.111495	0.233341	0.198421	0.0956135	0.0326411	0.0358932	0.0460467	0.0500168	0.0701944	0.0915621	0.0702185	0.182575	0.24347	0.177382	P50991	T-complex protein 1 subunit delta OS=Homo sapiens OX=9606 GN=CCT4 PE=1 SV=40	unknown	NUCLEUS	0.868299	NUCLEUS
D6RHI9	0.0427419	0.290553	0.216935	0.234101	0.0891705	0.0474654	0.0268433	0.0215438	0.0134793	0.0171659	0.0620959	0.258338	0.276935	0.19349	0.10854	0.0372895	0.0298957	0.0134114	0.00928238	0.0107227	0.0824402	0.263896	0.281094	0.192049	0.0909148	0.0397557	0.0166376	0.012151	0.00704138	0.0140204	D6RHI9	Ribonuclease T2 (Fragment) OS=Homo sapiens OX=9606 GN=RNASET2 PE=1 SV=80	unknown	LYSOSOME	0.746759	LYSOSOME
P33240	0.113258	0.092583	0.0512719	0.0679789	0.0957975	0.0786539	0.136871	0.174015	0.12683	0.0627406	0.163252	0.063863	0.0632032	0.0738992	0.120051	0.122586	0.158737	0.123281	0.076712	0.0344145	0.121312	0.0740855	0.0467457	0.0578911	0.108604	0.119303	0.095638	0.212021	0.0923064	0.0720934	P33240	Cleavage stimulation factor subunit 2 OS=Homo sapiens OX=9606 GN=CSTF2 PE=1 SV=10	unknown	NUCLEUS	0.900569	NUCLEUS
Q6PL18	0.21948	0.204603	0.047169	0.0722849	0.0806423	0.0666404	0.0361862	0.0736851	0.111709	0.0875995	0.301993	0.129378	0.0547261	0.0595549	0.0768718	0.0606649	0.0646057	0.0692679	0.0863629	0.0965755	0.277932	0.137629	0.0500708	0.0469774	0.0592461	0.0698369	0.039008	0.0697321	0.104179	0.145389	Q6PL18	ATPase family AAA domain-containing protein 2 OS=Homo sapiens OX=9606 GN=ATAD2 PE=1 SV=10	unknown	NUCLEUS-CHROMATIN	0.876317	NUCLEUS-CHROMATIN
P35998	0.0211164	0.0716579	0.0431893	0.0682223	0.0752486	0.0588716	0.0404322	0.133746	0.337286	0.15023	0.02878	0.0456102	0.0583748	0.0504866	0.080884	0.0700732	0.0668466	0.143016	0.23808	0.217848	0.0246488	0.0340715	0.0427895	0.0457593	0.0570353	0.0772207	0.037952	0.139581	0.311916	0.229026	P35998	26S proteasome regulatory subunit 7 OS=Homo sapiens OX=9606 GN=PSMC2 PE=1 SV=30	PROTEASOME	PROTEASOME	1	PROTEASOME
P12236	0.260803	0.562029	0.0859338	0.0295457	0.0186257	0.0100685	0.00706714	0.00957895	0.00896164	0.00738644	0.292646	0.490266	0.108632	0.0240189	0.0266877	0.0120313	0.0146126	0.0116376	0.0084438	0.0110251	0.336285	0.426263	0.120163	0.0357615	0.0178808	0.0149485	0.0125913	0.0167309	0.0137987	0.00557696	P12236	ADP/ATP translocase 3 OS=Homo sapiens OX=9606 GN=SLC25A6 PE=1 SV=40	unknown	MITOCHONDRIA	0.956866	MITOCHONDRIA
Q07864	0.0637913	0.119576	0.0512225	0.102703	0.0934917	0.0765324	0.052772	0.0920282	0.131543	0.21634	0.0731335	0.0747142	0.0728173	0.0649665	0.0870963	0.0875705	0.0911534	0.109384	0.0799304	0.259234	0.0659914	0.055471	0.051602	0.0552102	0.0797722	0.101508	0.0563405	0.103117	0.10829	0.322697	Q07864	DNA polymerase epsilon catalytic subunit A OS=Homo sapiens OX=9606 GN=POLE PE=1 SV=50	unknown	CYTOSOL	0.768124	unknown
P29373	0.0405158	0.0864135	0.0636677	0.0769699	0.124594	0.096974	0.0748375	0.0382819	0.0680341	0.329712	0.0548468	0.0926402	0.121151	0.0986872	0.135261	0.135685	0.120674	0.0681077	0.0585864	0.114361	0.0537487	0.0735556	0.0929509	0.0986689	0.10489	0.158639	0.0785874	0.0950094	0.0611134	0.182837	P29373	Cellular retinoic acid-binding protein 2 OS=Homo sapiens OX=9606 GN=CRABP2 PE=1 SV=20	unknown	CYTOSOL	0.909435	CYTOSOL
Q9H0A0	0.0876947	0.0920894	0.0380406	0.0679183	0.0803924	0.0645177	0.0941782	0.237409	0.218844	0.0189158	0.113126	0.0558385	0.0476309	0.0567803	0.0718189	0.0759072	0.137045	0.236529	0.176344	0.0289801	0.101028	0.0597291	0.0384384	0.0513471	0.0771297	0.0939809	0.123113	0.246086	0.177635	0.031513	Q9H0A0	RNA cytidine acetyltransferase OS=Homo sapiens OX=9606 GN=NAT10 PE=1 SV=20	NUCLEUS	NUCLEUS	1	NUCLEUS
Q14435	0.0663465	0.266882	0.158387	0.156077	0.104522	0.0753046	0.0762519	0.0697203	0.0209743	0.00553441	0.0687259	0.185515	0.150057	0.114551	0.0929696	0.0841108	0.119758	0.0948073	0.0510084	0.0384978	0.0927018	0.214852	0.183405	0.162081	0.105641	0.0795991	0.0682324	0.0620414	0.023028	0.0084185	Q14435	Polypeptide N-acetylgalactosaminyltransferase 3 OS=Homo sapiens OX=9606 GN=GALNT3 PE=1 SV=20	unknown	GOLGI	0.740095	GOLGI
Q96Q05	0.0757299	0.0958029	0.046837	0.102798	0.0888078	0.0809002	0.0854623	0.209246	0.190693	0.0237226	0.0586075	0.0745983	0.0800306	0.0769702	0.101836	0.0917368	0.149426	0.215761	0.132058	0.0189748	0.100211	0.0944093	0.0725211	0.0675105	0.103903	0.104694	0.103639	0.172468	0.143724	0.0369198	Q96Q05	Trafficking protein particle complex subunit 9 OS=Homo sapiens OX=9606 GN=TRAPPC9 PE=1 SV=20	unknown	NUCLEUS	0.930886	NUCLEUS
Q9NR50	0.0264662	0.0675405	0.0553254	0.065969	0.0878634	0.0800057	0.0704693	0.165976	0.210944	0.169441	0.036989	0.0552401	0.0630273	0.0646496	0.0905256	0.0914179	0.096366	0.145604	0.145198	0.210983	0.0263466	0.0397105	0.0493816	0.0547447	0.068724	0.100317	0.0565324	0.125315	0.17669	0.302239	Q9NR50	Translation initiation factor eIF-2B subunit gamma OS=Homo sapiens OX=9606 GN=EIF2B3 PE=1 SV=10	unknown	NUCLEUS	0.305938	unknown
Q13630	0.0288231	0.0922071	0.069589	0.0787964	0.100814	0.0795303	0.0711236	0.047905	0.0519082	0.379303	0.0418477	0.0694313	0.0984319	0.0688645	0.114113	0.10325	0.0857737	0.0559229	0.0466654	0.3157	0.0440541	0.0729171	0.0877186	0.0902505	0.118412	0.161025	0.0682039	0.097846	0.058505	0.201067	Q13630	GDP-L-fucose synthase OS=Homo sapiens OX=9606 GN=TSTA3 PE=1 SV=10	CYTOSOL	CYTOSOL	1	CYTOSOL
E9PRJ8	0.104088	0.165768	0.107191	0.16947	0.172628	0.109859	0.107954	0.0521531	0.00958136	0.00130655	0.099929	0.135991	0.134443	0.156377	0.156958	0.112057	0.143475	0.0441907	0.0121928	0.00438681	0.158968	0.157655	0.139633	0.140945	0.123885	0.107087	0.096063	0.0517935	0.0176728	0.00629921	E9PRJ8	Tetraspanin (Fragment) OS=Homo sapiens OX=9606 GN=CD81 PE=1 SV=10	unknown	PM	0.785188	PM
P18887	0.0798293	0.208188	0.0747708	0.123143	0.108283	0.0738223	0.0510591	0.0695542	0.108125	0.103225	0.109696	0.132279	0.12079	0.104969	0.118165	0.0851441	0.0796954	0.0778573	0.0646622	0.106742	0.151363	0.124386	0.097185	0.0924654	0.0980228	0.103496	0.0575011	0.073922	0.0790326	0.122626	P18887	DNA repair protein XRCC1 OS=Homo sapiens OX=9606 GN=XRCC1 PE=1 SV=20	unknown	NUCLEUS-CHROMATIN	0.36166	unknown
A0A087X0W8	0.0315922	0.133249	0.0661886	0.102045	0.115903	0.0887683	0.0623122	0.0378913	0.0718093	0.290241	0.0442478	0.067017	0.0959624	0.0839786	0.118363	0.129978	0.0908923	0.0673857	0.056969	0.245206	0.0447666	0.0561183	0.0735825	0.0626383	0.0817324	0.11049	0.0554779	0.065025	0.0643265	0.385842	A0A087X0W8	Transcription factor p65 OS=Homo sapiens OX=9606 GN=RELA PE=1 SV=10	unknown	CYTOSOL	0.906258	CYTOSOL
Q9UBP9	0.230438	0.37497	0.0808806	0.0684374	0.067241	0.0490548	0.0375688	0.0447475	0.0351759	0.011486	0.283631	0.233987	0.11196	0.0850547	0.0704739	0.0572817	0.0529422	0.0461725	0.0390557	0.0194411	0.292618	0.252837	0.114722	0.0700378	0.0735397	0.064855	0.0331979	0.0424429	0.0285754	0.0271747	Q9UBP9	PTB domain-containing engulfment adapter protein 1 OS=Homo sapiens OX=9606 GN=GULP1 PE=1 SV=10	unknown	NUCLEUS-CHROMATIN	0.420433	unknown
O95747	0.0483315	0.122695	0.0770721	0.107517	0.114065	0.115393	0.0802835	0.119017	0.0991747	0.116451	0.053557	0.0672044	0.0795838	0.0750477	0.11565	0.129781	0.135337	0.116421	0.0876494	0.139768	0.0468442	0.0530086	0.0602283	0.0739733	0.0924666	0.128537	0.069586	0.126621	0.116125	0.23261	O95747	Serine/threonine-protein kinase OSR1 OS=Homo sapiens OX=9606 GN=OXSR1 PE=1 SV=10	unknown	CYTOSOL	0.537757	unknown
P11172	0.0590114	0.132574	0.0846615	0.0950507	0.0988578	0.105762	0.0722075	0.0686262	0.0799832	0.203265	0.0544441	0.0830407	0.0817158	0.0685437	0.105786	0.108844	0.0903169	0.0854477	0.0633874	0.258474	0.0483594	0.0636115	0.0668317	0.0580602	0.0793601	0.106492	0.0499455	0.0742174	0.0629626	0.39016	P11172	Uridine 5'-monophosphate synthase OS=Homo sapiens OX=9606 GN=UMPS PE=1 SV=10	unknown	CYTOSOL	0.887706	CYTOSOL
Q96T51	0.0380109	0.199241	0.139941	0.214131	0.122987	0.0719705	0.0433526	0.0326435	0.0442558	0.0934661	0.0554496	0.120234	0.140547	0.141106	0.126118	0.0950894	0.0785235	0.0607415	0.0488759	0.133316	0.0590868	0.0952896	0.115416	0.115713	0.106233	0.0993404	0.0503701	0.0616106	0.0595746	0.237365	Q96T51	RUN and FYVE domain-containing protein 1 OS=Homo sapiens OX=9606 GN=RUFY1 PE=1 SV=20	unknown	CYTOSOL	0.22714	unknown
P39687	0.0435239	0.102255	0.072365	0.115889	0.12795	0.10173	0.0781332	0.0660724	0.0797063	0.212375	0.053245	0.0725633	0.0971502	0.090724	0.127764	0.0978686	0.098627	0.0491738	0.0487347	0.264149	0.0464456	0.0676811	0.066943	0.0622871	0.0819328	0.123325	0.0536566	0.0805701	0.0719964	0.345162	P39687	Acidic leucine-rich nuclear phosphoprotein 32 family member A OS=Homo sapiens OX=9606 GN=ANP32A PE=1 SV=10	unknown	CYTOSOL	0.911252	CYTOSOL
P49069	0.0364755	0.195442	0.141849	0.265103	0.190864	0.110142	0.0396701	0.00958375	0.00538788	0.00548324	0.0517356	0.110325	0.16125	0.217113	0.219766	0.117179	0.0921954	0.0197509	0.00545361	0.00523252	0.0590807	0.0981764	0.151012	0.176867	0.200724	0.15351	0.0888084	0.0418436	0.0143642	0.0156133	P49069	Calcium signal-modulating cyclophilin ligand OS=Homo sapiens OX=9606 GN=CAMLG PE=1 SV=10	unknown	ER	0.948722	ER
F5H3M2	0.0414054	0.106524	0.0461398	0.0811911	0.0769135	0.0601354	0.0645791	0.252211	0.250799	0.0201005	0.0430729	0.0584896	0.0480729	0.0530729	0.0760417	0.0659375	0.110729	0.306094	0.20401	0.0344792	0.0428036	0.0449438	0.0454194	0.0592117	0.0771654	0.0960109	0.108317	0.269782	0.215207	0.0411391	F5H3M2	Kinesin-like protein OS=Homo sapiens OX=9606 GN=KIFC3 PE=1 SV=10	unknown	NUCLEUS	0.946721	NUCLEUS
Q9UJF2-2	0.0494362	0.108246	0.0508318	0.0914379	0.087276	0.0759389	0.0828177	0.230188	0.204994	0.0188334	0.0678056	0.0740365	0.0625625	0.069376	0.0851306	0.0787097	0.124289	0.232279	0.174137	0.0316739	0.0640674	0.0591308	0.0503348	0.0620568	0.0878525	0.104969	0.113244	0.234953	0.194437	0.0289551	Q9UJF2-2	Isoform 2 of Ras GTPase-activating protein nGAP OS=Homo sapiens OX=9606 GN=RASAL20	unknown	NUCLEUS	0.958129	NUCLEUS
Q9H6R4	0.179294	0.138985	0.0296993	0.0651523	0.06911	0.057636	0.0645537	0.20151	0.179061	0.0149993	0.200227	0.0594178	0.0387068	0.0479889	0.0717308	0.0690156	0.122372	0.227821	0.13279	0.0299299	0.14697	0.072396	0.0357996	0.0404207	0.0610294	0.080682	0.105859	0.250598	0.170128	0.0361183	Q9H6R4	Nucleolar protein 6 OS=Homo sapiens OX=9606 GN=NOL6 PE=1 SV=20	unknown	NUCLEUS	0.962935	NUCLEUS
A0A087X211	0.0466155	0.0907305	0.0819789	0.0851343	0.108621	0.096416	0.0747455	0.0519736	0.092844	0.270941	0.0426194	0.0662915	0.0886697	0.0704229	0.0959589	0.129663	0.0909965	0.0744711	0.0574827	0.283425	0.0434189	0.0583729	0.078808	0.064161	0.0788694	0.112708	0.0535059	0.070809	0.0705019	0.368845	A0A087X211	Protein CIP2A OS=Homo sapiens OX=9606 GN=CIP2A PE=1 SV=10	unknown	CYTOSOL	0.916137	CYTOSOL
Q70EL4	0.0428456	0.0869846	0.0447858	0.0939369	0.0847211	0.0646726	0.0669361	0.272433	0.227809	0.0148747	0.0621504	0.067436	0.0612254	0.0643968	0.078668	0.0573933	0.104436	0.267894	0.189975	0.0464256	0.0389797	0.0445807	0.0530957	0.0659628	0.0959734	0.112095	0.123865	0.22419	0.189638	0.0516197	Q70EL4	Ubiquitin carboxyl-terminal hydrolase 43 OS=Homo sapiens OX=9606 GN=USP43 PE=1 SV=20	unknown	NUCLEUS	0.937797	NUCLEUS
Q8NDT2	0.124879	0.103582	0.0440465	0.0866409	0.0861568	0.071636	0.089545	0.223136	0.156825	0.0135528	0.167133	0.0559441	0.0545455	0.051049	0.0573427	0.0951049	0.113287	0.238462	0.154545	0.0125874	0.121151	0.0609103	0.0481928	0.04083	0.0742972	0.106426	0.147256	0.238286	0.141232	0.021419	Q8NDT2	Putative RNA-binding protein 15B OS=Homo sapiens OX=9606 GN=RBM15B PE=1 SV=30	unknown	NUCLEUS	0.957163	NUCLEUS
Q96SN8	0.0404213	0.132017	0.0562479	0.0944359	0.0918165	0.0815044	0.0761277	0.212722	0.187107	0.0276001	0.0479036	0.0650975	0.0652354	0.0596267	0.0890953	0.0903825	0.121736	0.261263	0.162284	0.0373759	0.047858	0.0714322	0.0690494	0.0643346	0.0952091	0.117972	0.0994677	0.199848	0.144892	0.0899366	Q96SN8	CDK5 regulatory subunit-associated protein 2 OS=Homo sapiens OX=9606 GN=CDK5RAP2 PE=1 SV=50	unknown	NUCLEUS	0.951584	NUCLEUS
P09382	0.06881	0.122464	0.0899747	0.115946	0.140419	0.0647241	0.0855919	0.0305948	0.033479	0.247996	0.103178	0.124549	0.103663	0.104928	0.119159	0.0954599	0.0837815	0.045425	0.0293141	0.190541	0.151141	0.143458	0.1177	0.099688	0.102023	0.0933421	0.0475059	0.0463739	0.0286521	0.170116	P09382	Galectin-1 OS=Homo sapiens OX=9606 GN=LGALS1 PE=1 SV=20	unknown	CYTOSOL	0.543725	unknown
Q9UL26	0.0713429	0.174886	0.122035	0.203183	0.175286	0.115124	0.0762217	0.0325042	0.0148444	0.0145725	0.0817822	0.124904	0.145703	0.157043	0.1624	0.125997	0.133987	0.0336265	0.0120568	0.0225013	0.114289	0.136082	0.136895	0.129976	0.165831	0.139024	0.0814589	0.0433906	0.0195804	0.0334743	Q9UL26	Ras-related protein Rab-22A OS=Homo sapiens OX=9606 GN=RAB22A PE=1 SV=20	unknown	PM	0.53176	unknown
Q8IX90	0.0353397	0.0742701	0.0520646	0.0797505	0.102712	0.0736086	0.105358	0.197864	0.196636	0.0823963	0.0622616	0.0568514	0.07051	0.0715743	0.112816	0.104302	0.143503	0.171619	0.127361	0.0792018	0.0633364	0.0502291	0.0448213	0.0467461	0.0789184	0.113382	0.0854262	0.202658	0.173786	0.140697	Q8IX90	Spindle and kinetochore-associated protein 3 OS=Homo sapiens OX=9606 GN=SKA3 PE=1 SV=20	unknown	NUCLEUS	0.937771	NUCLEUS
Q5JVZ5	0.0556551	0.0969397	0.0582552	0.0980992	0.104107	0.0855908	0.0832367	0.215769	0.1579	0.0444468	0.0568921	0.0655529	0.0675546	0.0689788	0.0979252	0.0999654	0.122945	0.209823	0.136726	0.0736364	0.0951586	0.0816465	0.0630217	0.0704299	0.0859245	0.102462	0.102775	0.170858	0.125678	0.102045	Q5JVZ5	Engulfment and cell motility protein 2 OS=Homo sapiens OX=9606 GN=ELMO2 PE=1 SV=10	unknown	NUCLEUS	0.95284	NUCLEUS
O00443	0.056712	0.106326	0.0533665	0.103027	0.108708	0.0947911	0.0834069	0.213617	0.165908	0.0141374	0.0721794	0.0849399	0.0722038	0.0843311	0.114755	0.116654	0.170959	0.165699	0.105631	0.0126468	0.0961766	0.093208	0.0659751	0.0798098	0.108067	0.124172	0.11421	0.164874	0.121798	0.0317096	O00443	Phosphatidylinositol 4-phosphate 3-kinase C2 domain-containing subunit alpha OS=Homo sapiens OX=9606 GN=PIK3C2A PE=1 SV=20	unknown	NUCLEUS	0.713969	unknown
Q9UJW0	0.0331812	0.120823	0.0766011	0.127737	0.129341	0.108747	0.101717	0.117264	0.123478	0.0611117	0.0505685	0.0765361	0.0853761	0.0928785	0.128326	0.10672	0.138911	0.127279	0.103463	0.0899416	0.0378597	0.0445481	0.0596796	0.0751001	0.101812	0.125903	0.116985	0.152843	0.147847	0.137422	Q9UJW0	Dynactin subunit 4 OS=Homo sapiens OX=9606 GN=DCTN4 PE=1 SV=10	unknown	NUCLEUS	0.483924	unknown
Q03701	0.156017	0.135164	0.0426862	0.0773882	0.0852174	0.0672334	0.0806439	0.196713	0.145216	0.0137206	0.181432	0.0700267	0.0478732	0.059564	0.0809381	0.0733332	0.13925	0.205994	0.121041	0.0205475	0.150382	0.082165	0.0334694	0.0488731	0.0760248	0.100053	0.096291	0.231056	0.157019	0.0246673	Q03701	CCAAT/enhancer-binding protein zeta OS=Homo sapiens OX=9606 GN=CEBPZ PE=1 SV=30	unknown	NUCLEUS	0.978232	NUCLEUS
P09012	0.079452	0.0809563	0.0312696	0.0540244	0.0734055	0.0603777	0.0958536	0.25965	0.242095	0.0229155	0.0946484	0.0546737	0.0468723	0.0566558	0.078871	0.0721161	0.123571	0.266265	0.167319	0.0390074	0.111755	0.0689615	0.0382484	0.0479095	0.0720548	0.0929162	0.0954817	0.24223	0.164751	0.0656923	P09012	U1 small nuclear ribonucleoprotein A OS=Homo sapiens OX=9606 GN=SNRPA PE=1 SV=30	unknown	NUCLEUS	0.975292	NUCLEUS
P29353	0.0607347	0.186016	0.0645469	0.0953041	0.0907122	0.0776295	0.0623809	0.144516	0.139837	0.0783226	0.0840764	0.126964	0.0802194	0.0733192	0.10138	0.0916136	0.09862	0.149328	0.0998585	0.0946214	0.109439	0.108488	0.0814267	0.0680179	0.0864495	0.0976457	0.0735496	0.13754	0.105036	0.132407	P29353	SHC-transforming protein 1 OS=Homo sapiens OX=9606 GN=SHC1 PE=1 SV=40	unknown	NUCLEUS	0.674794	unknown
O95793	0.0406405	0.134786	0.0576817	0.108534	0.105506	0.0885833	0.0954604	0.206494	0.156457	0.00585753	0.0378146	0.0531442	0.0598266	0.0774216	0.107421	0.0865673	0.151801	0.258925	0.15451	0.0125694	0.0278869	0.0396418	0.0531352	0.0680622	0.116844	0.131342	0.161154	0.242695	0.144055	0.0151842	O95793	Double-stranded RNA-binding protein Staufen homolog 1 OS=Homo sapiens OX=9606 GN=STAU1 PE=1 SV=20	unknown	RIBOSOME	0.877836	RIBOSOME
O75054	0.0907487	0.172053	0.115783	0.182237	0.157943	0.129609	0.0786299	0.0381202	0.0225307	0.0123464	0.102166	0.128796	0.140016	0.169687	0.158961	0.116714	0.12481	0.0366991	0.0134796	0.00867135	0.145984	0.154298	0.140849	0.125199	0.129233	0.09989	0.0927986	0.0644333	0.0273872	0.0199291	O75054	Immunoglobulin superfamily member 3 OS=Homo sapiens OX=9606 GN=IGSF3 PE=2 SV=30	unknown	PM	0.791863	PM
Q16658	0.0582814	0.132821	0.0798337	0.143243	0.12341	0.0814692	0.052474	0.0388635	0.0480111	0.241594	0.0614464	0.0781368	0.0947049	0.0945603	0.115343	0.0872771	0.079182	0.0650825	0.0498154	0.274452	0.0439121	0.0527997	0.0631448	0.0666084	0.0756503	0.0932426	0.0592525	0.0810971	0.0571321	0.40716	Q16658	Fascin OS=Homo sapiens OX=9606 GN=FSCN1 PE=1 SV=30	unknown	CYTOSOL	0.852781	unknown
Q9NR45	0.0264706	0.133669	0.0719814	0.108359	0.114358	0.102864	0.0627322	0.0385449	0.0456656	0.295356	0.044846	0.0709331	0.0902588	0.0766687	0.118357	0.107601	0.095927	0.0840104	0.0629572	0.248441	0.0471553	0.0578168	0.0758031	0.0703521	0.0850318	0.114932	0.0600713	0.0831179	0.0561133	0.349606	Q9NR45	Sialic acid synthase OS=Homo sapiens OX=9606 GN=NANS PE=1 SV=20	CYTOSOL	CYTOSOL	1	CYTOSOL
P50914	0.028171	0.0888545	0.0661022	0.114081	0.112604	0.0840343	0.113107	0.22382	0.167877	0.0013487	0.0340259	0.0576073	0.0659063	0.0832431	0.0938395	0.0798122	0.14086	0.281326	0.157782	0.00559677	0.0297576	0.0439025	0.0535938	0.0668212	0.1125	0.128397	0.151749	0.246868	0.157203	0.00920752	P50914	60S ribosomal protein L14 OS=Homo sapiens OX=9606 GN=RPL14 PE=1 SV=40	RIBOSOME	RIBOSOME	1	RIBOSOME
Q9BW27	0.277969	0.165274	0.059755	0.0855327	0.0922974	0.0539128	0.0450469	0.0347973	0.0474043	0.138011	0.270372	0.0988568	0.0686648	0.0647442	0.0818188	0.0814891	0.0521398	0.0441888	0.0338561	0.203869	0.281975	0.146156	0.0590564	0.0700539	0.0644452	0.0808314	0.04333	0.0472891	0.0511382	0.155724	Q9BW27	Nuclear pore complex protein Nup85 OS=Homo sapiens OX=9606 GN=NUP85 PE=1 SV=10	unknown	NUCLEUS-CHROMATIN	0.658726	NUCLEUS-CHROMATIN
Q9Y4P8	0.0406638	0.138586	0.112803	0.129054	0.1355	0.129809	0.0848248	0.0654186	0.0845505	0.0787904	0.0438058	0.104932	0.141437	0.113864	0.131728	0.15635	0.120466	0.0572427	0.056233	0.0739417	0.0430802	0.0655604	0.10815	0.0922096	0.113709	0.13856	0.0759421	0.0874683	0.083054	0.192267	Q9Y4P8	WD repeat domain phosphoinositide-interacting protein 2 OS=Homo sapiens OX=9606 GN=WIPI2 PE=1 SV=10	unknown	CYTOSOL	0.337245	unknown
P07900	0.0347271	0.100764	0.0697575	0.103689	0.115239	0.0994594	0.0635705	0.0435069	0.0606172	0.308669	0.0419594	0.0655404	0.0898177	0.0718779	0.126251	0.118361	0.103758	0.054581	0.0456244	0.282229	0.0361417	0.0561469	0.0705565	0.073224	0.0949687	0.130935	0.0556985	0.0718225	0.0509517	0.359554	P07900	Heat shock protein HSP 90-alpha OS=Homo sapiens OX=9606 GN=HSP90AA1 PE=1 SV=50	unknown	CYTOSOL	0.934054	CYTOSOL
Q13885	0.0437318	0.115646	0.0736961	0.0810658	0.102122	0.0870586	0.079608	0.0400875	0.063654	0.31333	0.0428309	0.0619511	0.0806722	0.0717707	0.114522	0.106459	0.0919288	0.0575603	0.0506946	0.321611	0.0408537	0.0507555	0.0628576	0.0648379	0.0844213	0.0992372	0.0528825	0.0630776	0.0539827	0.427094	Q13885	Tubulin beta-2A chain OS=Homo sapiens OX=9606 GN=TUBB2A PE=1 SV=10	unknown	CYTOSOL	0.912237	CYTOSOL
J3KNI1	0.0548173	0.149239	0.100192	0.0904878	0.0967827	0.0957335	0.0871656	0.0879524	0.0899633	0.147666	0.0540734	0.0961504	0.0951059	0.0828111	0.0934646	0.0940018	0.112086	0.103074	0.0733512	0.195882	0.0617483	0.101467	0.0936144	0.0837363	0.0929531	0.0989874	0.055466	0.0910105	0.0732383	0.247778	J3KNI1	Conserved oligomeric Golgi complex subunit 4 OS=Homo sapiens OX=9606 GN=COG4 PE=1 SV=10	unknown	CYTOSOL	0.693321	unknown
Q92575	0.0365829	0.178338	0.112679	0.232994	0.173942	0.102422	0.0546815	0.0511852	0.0355031	0.0216721	0.051896	0.110456	0.16477	0.19921	0.1906	0.133514	0.10273	0.0201097	0.0117356	0.0149791	0.0525381	0.0934301	0.144558	0.16832	0.213443	0.170462	0.0914978	0.0393253	0.0113328	0.015093	Q92575	UBX domain-containing protein 4 OS=Homo sapiens OX=9606 GN=UBXN4 PE=1 SV=20	unknown	ER	0.880815	ER
P63220	0.0223552	0.0745792	0.0752814	0.100496	0.118241	0.111405	0.129431	0.196592	0.153236	0.0183827	0.0416785	0.0600805	0.0766594	0.105999	0.140049	0.122869	0.1782	0.108007	0.140901	0.0255553	0.0290131	0.0427072	0.0483249	0.0778515	0.13029	0.155407	0.143332	0.2115	0.135467	0.0261075	P63220	40S ribosomal protein S21 OS=Homo sapiens OX=9606 GN=RPS21 PE=1 SV=10	RIBOSOME	RIBOSOME	1	RIBOSOME
Q05823	0.0758831	0.109173	0.0423027	0.0915831	0.100451	0.078209	0.0700683	0.212676	0.200029	0.0196249	0.0579545	0.0575	0.0447727	0.0596591	0.0719318	0.0773864	0.127614	0.264545	0.185	0.0536364	0.0899191	0.0747327	0.0448596	0.0746328	0.100909	0.12199	0.107503	0.172545	0.125087	0.087821	Q05823	2-5A-dependent ribonuclease OS=Homo sapiens OX=9606 GN=RNASEL PE=1 SV=20	unknown	NUCLEUS	0.959687	NUCLEUS
Q5VXN0	0.130878	0.090864	0.0310907	0.059313	0.0703612	0.0663598	0.0763102	0.266431	0.197627	0.0107649	0.14122	0.057997	0.0346096	0.0448416	0.0659185	0.0680875	0.131554	0.274661	0.17418	0.00693135	0.106753	0.0587839	0.0269239	0.0505273	0.0738613	0.088131	0.122369	0.290285	0.178326	0.00403859	Q5VXN0	Ribosome production factor 2 homolog (Fragment) OS=Homo sapiens OX=9606 GN=RPF2 PE=1 SV=10	unknown	NUCLEUS	0.962235	NUCLEUS
Q1ED39	0.087863	0.108563	0.0376272	0.0731199	0.0929263	0.0738148	0.104195	0.225217	0.182676	0.0139985	0.104575	0.0512334	0.0562935	0.0529201	0.0619861	0.0421674	0.139785	0.276618	0.190386	0.0240354	0.105302	0.0603966	0.0437366	0.0652377	0.113515	0.137153	0.151643	0.193443	0.105936	0.0236378	Q1ED39	Lysine-rich nucleolar protein 1 OS=Homo sapiens OX=9606 GN=KNOP1 PE=1 SV=10	unknown	NUCLEUS	0.851227	unknown
Q9NUJ3	0.0477947	0.0961508	0.0761828	0.0858861	0.109944	0.0832398	0.0727346	0.0527666	0.0899759	0.285325	0.041354	0.0648491	0.0883102	0.081316	0.112145	0.130377	0.102876	0.0593827	0.0507588	0.268631	0.0277692	0.045783	0.0679261	0.0508413	0.0664292	0.098018	0.0535253	0.0848044	0.0868174	0.418086	Q9NUJ3	T-complex protein 11-like protein 1 OS=Homo sapiens OX=9606 GN=TCP11L1 PE=1 SV=10	unknown	CYTOSOL	0.879611	CYTOSOL
P18206	0.0400718	0.111617	0.075883	0.110163	0.111775	0.0879175	0.0617527	0.0401733	0.0577317	0.302915	0.0482252	0.0792707	0.105917	0.0905357	0.133471	0.115469	0.102248	0.0702197	0.0507371	0.203908	0.0494798	0.0679079	0.0803482	0.0802678	0.0954547	0.123333	0.0577499	0.0766952	0.0541847	0.314579	P18206	Vinculin OS=Homo sapiens OX=9606 GN=VCL PE=1 SV=40	unknown	CYTOSOL	0.927409	CYTOSOL
Q9NW64	0.0776909	0.108967	0.0405922	0.0911662	0.0905007	0.0600566	0.0760273	0.225087	0.198137	0.0317751	0.0904322	0.0472549	0.0421194	0.0479161	0.0802495	0.0753345	0.129819	0.271627	0.18838	0.0268674	0.0830092	0.0579436	0.0555833	0.0583425	0.0923174	0.106812	0.111698	0.221868	0.133739	0.0786875	Q9NW64	Pre-mRNA-splicing factor RBM22 OS=Homo sapiens OX=9606 GN=RBM22 PE=1 SV=10	NUCLEUS	NUCLEUS	1	NUCLEUS
A6NN50	0.0531554	0.102315	0.0628817	0.101636	0.10797	0.0852748	0.0680087	0.167383	0.149891	0.101485	0.0573194	0.0729447	0.0783458	0.0803787	0.106408	0.0897658	0.112088	0.170922	0.121076	0.110752	0.058506	0.0589419	0.0642393	0.066318	0.094079	0.120499	0.0741635	0.138537	0.120298	0.204419	A6NN50	Obscurin-like protein 1 OS=Homo sapiens OX=9606 GN=OBSL1 PE=1 SV=10	unknown	NUCLEUS	0.756541	unknown
Q9NW68-2	0.0520779	0.161319	0.118008	0.117833	0.107487	0.0676837	0.108364	0.0913554	0.0589164	0.116956	0.051679	0.0959752	0.0969278	0.0988331	0.123125	0.112646	0.114313	0.0800191	0.0357228	0.19076	0.0667819	0.107951	0.116593	0.118165	0.100251	0.0996229	0.063325	0.0867379	0.0542112	0.186361	Q9NW68-2	Isoform 2 of BSD domain-containing protein 1 OS=Homo sapiens OX=9606 GN=BSDC10	unknown	CYTOSOL	0.435901	unknown
O43310-2	0.0301653	0.1	0.0522727	0.0900826	0.0971074	0.0859504	0.0729339	0.234298	0.214876	0.022314	0.0364452	0.0484308	0.0597061	0.0657433	0.084432	0.0907356	0.149953	0.24424	0.178763	0.0415501	0.0370752	0.0363649	0.0444973	0.0574949	0.0962747	0.109947	0.114635	0.21652	0.194645	0.0925459	O43310-2	Isoform 2 of CBP80/20-dependent translation initiation factor OS=Homo sapiens OX=9606 GN=CTIF0	unknown	NUCLEUS	0.926957	NUCLEUS
Q14156	0.152352	0.178244	0.102779	0.161194	0.14509	0.0991475	0.0732554	0.0393117	0.033628	0.0149984	0.155928	0.178801	0.113244	0.131727	0.128868	0.0880221	0.100991	0.061983	0.0196058	0.0208312	0.211777	0.201239	0.143465	0.103808	0.0953966	0.0766315	0.0581438	0.0449251	0.0302274	0.0343871	Q14156	Protein EFR3 homolog A OS=Homo sapiens OX=9606 GN=EFR3A PE=1 SV=20	unknown	PM	0.822091	PM
Q16531	0.0701346	0.0750094	0.0646416	0.0702345	0.099212	0.0785145	0.084426	0.0852916	0.108172	0.264364	0.0794455	0.0654561	0.0760482	0.0654655	0.0863496	0.0963385	0.0930193	0.0849963	0.0785267	0.274354	0.0724151	0.0598303	0.0573414	0.0617991	0.0779847	0.106369	0.0563014	0.092473	0.10148	0.314006	Q16531	DNA damage-binding protein 1 OS=Homo sapiens OX=9606 GN=DDB1 PE=1 SV=10	unknown	CYTOSOL	0.877596	CYTOSOL
P31947	0.0285884	0.0805513	0.0821186	0.0838532	0.12009	0.105086	0.0944067	0.0442933	0.046404	0.314609	0.0465347	0.0776444	0.103708	0.0870579	0.128838	0.120121	0.109096	0.0483245	0.0407919	0.237884	0.0408456	0.0618048	0.0801925	0.082417	0.0975783	0.131443	0.0641871	0.0826615	0.0548474	0.304023	P31947	14-3-3 protein sigma OS=Homo sapiens OX=9606 GN=SFN PE=1 SV=10	unknown	CYTOSOL	0.927141	CYTOSOL
Q5JSH3	0.0447709	0.118267	0.0912032	0.127929	0.127973	0.121327	0.0772998	0.0540836	0.0516789	0.185467	0.0527604	0.083627	0.103351	0.092453	0.135735	0.133059	0.103563	0.0569042	0.050509	0.188038	0.0470129	0.0571176	0.0766859	0.0790976	0.0984828	0.123943	0.0628263	0.0790976	0.0616662	0.31407	Q5JSH3	WD repeat-containing protein 44 OS=Homo sapiens OX=9606 GN=WDR44 PE=1 SV=10	unknown	CYTOSOL	0.839057	unknown
Q8WXI9	0.293978	0.236216	0.046275	0.0600591	0.0580079	0.042829	0.0388907	0.0800788	0.0957499	0.047916	0.424537	0.106263	0.0339138	0.0385149	0.0554917	0.0485502	0.055571	0.108564	0.0957915	0.0328031	0.387425	0.151944	0.0462372	0.0369124	0.0441091	0.0437222	0.0371832	0.0860128	0.0852389	0.0812149	Q8WXI9	Transcriptional repressor p66-beta OS=Homo sapiens OX=9606 GN=GATAD2B PE=1 SV=10	NUCLEUS-CHROMATIN	NUCLEUS-CHROMATIN	1	NUCLEUS-CHROMATIN
P24941	0.0545485	0.0996631	0.0638814	0.0971361	0.098248	0.0825135	0.0899933	0.198787	0.158187	0.0570418	0.0818042	0.112241	0.0828447	0.0746603	0.0947912	0.0900686	0.123927	0.162528	0.126088	0.0510476	0.0688684	0.0611879	0.062852	0.0658328	0.0931168	0.114531	0.0881794	0.171476	0.129837	0.144119	P24941	Cyclin-dependent kinase 2 OS=Homo sapiens OX=9606 GN=CDK2 PE=1 SV=20	NUCLEUS	NUCLEUS	1	NUCLEUS
P31946	0.0365288	0.0816342	0.0722135	0.0831657	0.11023	0.086855	0.0771655	0.0456806	0.0572488	0.349278	0.0429921	0.0666805	0.0884475	0.0765024	0.118594	0.10038	0.0988364	0.0616152	0.0440694	0.301883	0.0494025	0.0676608	0.0743992	0.0803991	0.0964236	0.122071	0.061324	0.0783315	0.0521117	0.317877	P31946	14-3-3 protein beta/alpha OS=Homo sapiens OX=9606 GN=YWHAB PE=1 SV=30	unknown	CYTOSOL	0.937391	CYTOSOL
O15234	0.0543315	0.0968953	0.0603405	0.0838758	0.116174	0.0913871	0.104907	0.196795	0.167001	0.0282924	0.0224991	0.0373832	0.0380755	0.0578055	0.0944964	0.102804	0.215646	0.284874	0.137072	0.00934579	0.0289244	0.0308854	0.0437298	0.0463771	0.0970683	0.109815	0.105991	0.295813	0.185606	0.0557898	O15234	Protein CASC3 OS=Homo sapiens OX=9606 GN=CASC3 PE=1 SV=20	unknown	NUCLEUS	0.743849	unknown
Q969T9	0.0344	0.1104	0.0813333	0.114933	0.1448	0.0981333	0.136533	0.0701333	0.0624	0.146933	0.0540184	0.109714	0.128518	0.0960594	0.137621	0.158223	0.111031	0.0747395	0.055336	0.0747395	0.0697591	0.0794678	0.127292	0.0938511	0.126214	0.147789	0.0827041	0.102841	0.0765912	0.0934915	Q969T9	WW domain-binding protein 2 OS=Homo sapiens OX=9606 GN=WBP2 PE=1 SV=10	unknown	CYTOSOL	0.367109	unknown
A0A0C4DG33	0.0409268	0.196333	0.129421	0.222607	0.138011	0.0731919	0.0371734	0.0622925	0.0630143	0.037029	0.0520147	0.119658	0.148637	0.165975	0.137159	0.0830281	0.0866911	0.0875051	0.0713065	0.048026	0.0596552	0.101523	0.140472	0.165146	0.163094	0.13614	0.0532245	0.0514002	0.057238	0.0721062	A0A0C4DG33	Peroxisome biogenesis factor 1 OS=Homo sapiens OX=9606 GN=PEX1 PE=1 SV=10	unknown	ER	0.336001	unknown
Q8N612	0.042338	0.103784	0.0558262	0.0955414	0.109404	0.0599475	0.0805545	0.143125	0.173848	0.135631	0.0526553	0.0669475	0.0704077	0.0624342	0.101249	0.10185	0.11539	0.146683	0.0947796	0.187603	0.0441029	0.0583027	0.0663214	0.074006	0.110591	0.132142	0.0735048	0.111594	0.0938857	0.23555	Q8N612	FTS and Hook-interacting protein OS=Homo sapiens OX=9606 GN=FAM160A2 PE=1 SV=30	unknown	CYTOSOL	0.409877	unknown
E9PGP6	0.0464692	0.0993166	0.0510251	0.0920273	0.137585	0.0801822	0.0915718	0.111617	0.129841	0.160364	0.0516129	0.0656891	0.08739	0.0762463	0.0926686	0.100293	0.0821114	0.139589	0.11085	0.193548	0.0467485	0.0639854	0.0854009	0.0707757	0.0827892	0.115435	0.0485767	0.0940193	0.101593	0.290676	E9PGP6	5'-AMP-activated protein kinase subunit gamma-2 OS=Homo sapiens OX=9606 GN=PRKAG2 PE=1 SV=10	unknown	CYTOSOL	0.660003	unknown
B4DHE8	0.037229	0.12002	0.0546412	0.135732	0.138303	0.12458	0.132499	0.159363	0.0818789	0.0157539	0.0413787	0.0583421	0.070192	0.0908726	0.121606	0.130366	0.216597	0.17651	0.078534	0.0156021	0.0340401	0.0491691	0.0489398	0.0732378	0.111519	0.153582	0.178682	0.270602	0.0695702	0.010659	B4DHE8	RNA-binding protein Musashi homolog 2 OS=Homo sapiens OX=9606 GN=MSI2 PE=1 SV=10	unknown	RIBOSOME	0.467438	unknown
Q9H3N1	0.0575487	0.183372	0.155358	0.248771	0.180838	0.1047	0.0455623	0.00856176	0.00753435	0.00775353	0.0688168	0.111509	0.154516	0.195081	0.245862	0.110985	0.0880657	0.012538	0.00533277	0.00729512	0.078892	0.119376	0.139552	0.180341	0.213928	0.156498	0.071119	0.0215472	0.00830642	0.0104402	Q9H3N1	Thioredoxin-related transmembrane protein 1 OS=Homo sapiens OX=9606 GN=TMX1 PE=1 SV=10	ER	ER	1	ER
E7EU96	0.0478758	0.116584	0.0599416	0.0949656	0.0977883	0.0749851	0.0594102	0.111968	0.152937	0.183544	0.0545628	0.0651552	0.0803098	0.077494	0.106063	0.101792	0.108461	0.112656	0.106753	0.186753	0.0453579	0.0566314	0.056875	0.06197	0.0843872	0.116875	0.0552837	0.110733	0.111407	0.300479	E7EU96	Casein kinase II subunit alpha OS=Homo sapiens OX=9606 GN=CSNK2A1 PE=1 SV=10	unknown	CYTOSOL	0.689606	unknown
Q96ST3	0.245659	0.194955	0.0304855	0.0568513	0.0573583	0.0458867	0.0443656	0.131956	0.139878	0.0526049	0.241772	0.0773614	0.0524291	0.0374697	0.0548511	0.0545662	0.0740846	0.186921	0.135204	0.0853398	0.276025	0.132999	0.0450211	0.0464956	0.0698909	0.0713654	0.0572103	0.125528	0.0958419	0.0796225	Q96ST3	Paired amphipathic helix protein Sin3a OS=Homo sapiens OX=9606 GN=SIN3A PE=1 SV=20	unknown	NUCLEUS-CHROMATIN	0.875687	NUCLEUS-CHROMATIN
K7ELG9	0.0307362	0.0943843	0.0610868	0.118979	0.127572	0.104822	0.115343	0.190091	0.139414	0.0175714	0.0403767	0.062426	0.0740991	0.0907912	0.108555	0.120228	0.194271	0.175266	0.114645	0.0193425	0.0302982	0.0445812	0.0560663	0.0635809	0.103419	0.124204	0.161804	0.259653	0.119194	0.0371999	K7ELG9	Protein LSM12 homolog OS=Homo sapiens OX=9606 GN=LSM12 PE=1 SV=10	unknown	RIBOSOME	0.850227	RIBOSOME
P52565	0.0317686	0.0943802	0.0675702	0.090843	0.107669	0.0904463	0.0692893	0.0358347	0.054314	0.357884	0.044096	0.0700726	0.0926795	0.0726805	0.121586	0.11195	0.092036	0.0627741	0.045112	0.287013	0.0438324	0.0594505	0.076366	0.0765959	0.0994728	0.129609	0.0609614	0.0800118	0.0510584	0.322642	P52565	Rho GDP-dissociation inhibitor 1 OS=Homo sapiens OX=9606 GN=ARHGDIA PE=1 SV=30	unknown	CYTOSOL	0.936256	CYTOSOL
O00762	0.0363877	0.0939432	0.106644	0.0871253	0.123383	0.100462	0.107657	0.0554776	0.0674251	0.221495	0.0394537	0.0733999	0.0919228	0.0732147	0.121473	0.137366	0.0887369	0.0632618	0.050234	0.260938	0.0404977	0.0520074	0.0795324	0.0696151	0.0879737	0.116988	0.0538459	0.0682298	0.0602027	0.371108	O00762	Ubiquitin-conjugating enzyme E2 C OS=Homo sapiens OX=9606 GN=UBE2C PE=1 SV=10	unknown	CYTOSOL	0.849176	unknown
P11908	0.0204759	0.0566956	0.0365145	0.0638009	0.0717318	0.0655846	0.0716581	0.249735	0.265537	0.0982664	0.0254222	0.0399212	0.0535263	0.0460812	0.0738221	0.0641421	0.0885586	0.249193	0.235449	0.123884	0.0281988	0.0349692	0.0383346	0.0430673	0.0536501	0.072607	0.06092	0.229521	0.302957	0.135775	P11908	Ribose-phosphate pyrophosphokinase 2 OS=Homo sapiens OX=9606 GN=PRPS2 PE=1 SV=20	unknown	NUCLEUS	0.719969	unknown
Q9H1B7	0.0810567	0.0884762	0.0542523	0.0753527	0.0883476	0.0871896	0.104945	0.230261	0.170262	0.0198568	0.107375	0.0625846	0.0547361	0.064479	0.108457	0.0902571	0.140054	0.194723	0.142152	0.0351827	0.0901551	0.0579356	0.049642	0.0550119	0.0853222	0.104952	0.109547	0.229833	0.161933	0.0556683	Q9H1B7	Interferon regulatory factor 2-binding protein-like OS=Homo sapiens OX=9606 GN=IRF2BPL PE=1 SV=10	unknown	NUCLEUS	0.962746	NUCLEUS
[truncated: 3,426 more rows]

## Sheet: Column Legend
UniProt accession for protein group		Unique UniProt accession for quantified protein group reported by Proteome Discoverer (1% FDR).
UniProt protein description		UniProt description for protein accession.
[truncated: 34 more rows]
