# Supplementary material for: CFTR Rescue by Lumacaftor (VX-809) Induces an Extensive Reorganization of Mitochondria in the Cystic Fibrosis Bronchial Epithelium
Source: Cells. 2022 Jun 16;11(12):1938. doi: 10.3390/cells11121938 (PMC9222197; doi:10.3390/cells11121938)
Supplement: Supplementary file 1 [file cells-11-01938-s001.zip › Supplementary File_2c.xlsx]

## Sheet: LOPIT-DC Data_Treated
UniProt accession for protein group	Normalised TMT 10-plex reporter ion distribution (Replicate 1)										Normalised TMT 10-plex reporter ion distribution (Replicate 2)										Normalised TMT 10-plex reporter ion distribution (Replicate 3)										UniProt accession for protein group	UniProt protein description	SVM classification of protein localisation
	126_P1rep1	127N_P2rep1	127C_P3rep1	129N_P4rep1	128C_P5rep1	128N_P6rep1	129C_P7rep1	130N_P8rep1	130C_P9rep1	131_SNrep1	126_P1rep2	127N_P2rep2	127C_P3rep2	129N_P4rep2	128C_P5rep2	128N_P6rep2	129C_P7rep2	130N_P8rep2	130C_P9rep2	131_SNrep2	126_P1rep3	127N_P2rep3	127C_P3rep3	129N_P4rep3	128C_P5rep3	128N_P6rep3	129C_P7rep3	130N_P8rep3	130C_P9rep3	131_SNrep3			Subcellular markers	SVM classification	SVM score	Curated SVM predictions
J3KPS0	0.051672	0.109085	0.175702	0.312223	0.137836	0.0864268	0.08967	0.0213876	0.00898453	0.00701232	0.0702139	0.0875687	0.225962	0.244144	0.183211	0.0800038	0.0467245	0.0168145	0.0164013	0.0289565	0.0597934	0.136359	0.22368	0.193689	0.146214	0.0942386	0.0665687	0.0295651	0.0217	0.028191	J3KPS0	DnaJ (Hsp40) homolog subfamily B member 12 isoform CRA_c OS=Homo sapiens OX=9606 GN=DNAJB12 PE=1 SV=1	unknown	ER	0.951264	ER
Q13011	0.250405	0.300616	0.167569	0.168192	0.0547877	0.0224131	0.0155647	0.00694185	0.00600797	0.00750218	0.231067	0.17976	0.176554	0.143167	0.0881512	0.0304945	0.0450501	0.037788	0.0345814	0.0333868	0.227931	0.282583	0.224483	0.0951307	0.0570358	0.0309866	0.0238359	0.0216225	0.0187282	0.0176641	Q13011	Delta(35)-Delta(24)-dienoyl-CoA isomerase mitochondrial OS=Homo sapiens OX=9606 GN=ECH1 PE=1 SV=2	unknown	NUCLEUS-CHROMATIN	0.245924	unknown
Q9H553	0.0629031	0.113977	0.170334	0.296853	0.157047	0.0889912	0.0691901	0.018213	0.0102408	0.0122501	0.0650806	0.0805954	0.195462	0.239804	0.168964	0.0946312	0.0581886	0.0235712	0.0316591	0.0420443	0.0792364	0.113319	0.227118	0.189069	0.1447	0.106389	0.0705631	0.0314243	0.017826	0.0203539	Q9H553	Alpha-1, 6-mannosyltransferase ALG2 OS=Homo sapiens OX=9606 GN=ALG2 PE=1 SV=1	unknown	ER	0.926541	ER
Q96EY8	0.341751	0.403493	0.124027	0.0430573	0.0132015	0.0112382	0.0114413	0.0185499	0.0104258	0.022815	0.443065	0.274437	0.150254	0.0345679	0.0154684	0.010167	0.00827887	0.00885984	0.008061	0.046841	0.358201	0.395854	0.156419	0.0274384	0.00761065	0.00731023	0.0077108	0.00811136	0.00610855	0.0252353	Q96EY8	Cob(I)yrinic acid ac-diamide adenosyltransferase mitochondrial OS=Homo sapiens OX=9606 GN=MMAB PE=1 SV=1	unknown	MITOCHONDRIA	0.962045	MITOCHONDRIA
P08559	0.355448	0.445744	0.126555	0.0242599	0.00385356	0.00893326	0.00963391	0.00858294	0.0102908	0.00669995	0.4692	0.282814	0.146913	0.0267018	0.00510114	0.00573439	0.00524186	0.0123835	0.0162885	0.0296218	0.358598	0.403864	0.131163	0.0107237	0.00972679	0.0100501	0.00848736	0.0202619	0.025974	0.021151	P08559	Pyruvate dehydrogenase E1 component subunit alpha somatic form mitochondrial OS=Homo sapiens OX=9606 GN=PDHA1 PE=1 SV=3	MITOCHONDRIA	MITOCHONDRIA	1	MITOCHONDRIA
Q16698	0.351819	0.432121	0.131393	0.0123671	0.00436486	0.00895355	0.0153889	0.018075	0.0142138	0.0113039	0.391287	0.234626	0.134634	0.0372189	0.0174701	0.0154355	0.0157882	0.0267477	0.0536039	0.0731899	0.341305	0.391358	0.133735	0.0234264	0.013758	0.0157139	0.0193368	0.0258935	0.0190923	0.0163807	Q16698	24-dienoyl-CoA reductase mitochondrial OS=Homo sapiens OX=9606 GN=DECR1 PE=1 SV=1	MITOCHONDRIA	MITOCHONDRIA	1	MITOCHONDRIA
O15357	0.0465128	0.0522646	0.0595105	0.0949678	0.0623241	0.0693957	0.126864	0.202784	0.192351	0.0930256	0.0831986	0.0416973	0.072419	0.0635994	0.0816307	0.0638444	0.0866284	0.13837	0.19462	0.173992	0.050728	0.0628617	0.0937092	0.0692085	0.073362	0.073782	0.0888557	0.146304	0.150177	0.191012	O15357	Phosphatidylinositol 345-trisphosphate 5-phosphatase 2 OS=Homo sapiens OX=9606 GN=INPPL1 PE=1 SV=2	unknown	NUCLEUS	0.951534	NUCLEUS
Q07666	0.133364	0.0454816	0.0383067	0.0803832	0.0573587	0.0742217	0.184196	0.200924	0.170346	0.0154173	0.180851	0.0321445	0.0530384	0.0647482	0.0815475	0.0786775	0.101753	0.182917	0.168606	0.0557171	0.26538	0.101046	0.0553329	0.053668	0.0556001	0.0581489	0.114078	0.199112	0.0925161	0.00511809	Q07666	KH domain-containing RNA-binding signal transduction-associated protein 1 OS=Homo sapiens OX=9606 GN=KHDRBS1 PE=1 SV=1	unknown	NUCLEUS	0.957563	NUCLEUS
P19388	0.068674	0.0441335	0.0468858	0.0832214	0.0701157	0.0781757	0.126503	0.227614	0.175748	0.0789293	0.0677116	0.0374243	0.0668308	0.0634881	0.0858253	0.0744196	0.0883775	0.156744	0.193604	0.165575	0.0707988	0.0505045	0.0712324	0.0594085	0.0688329	0.0673297	0.100286	0.184412	0.19852	0.128675	P19388	DNA-directed RNA polymerases I II and III subunit RPABC1 OS=Homo sapiens OX=9606 GN=POLR2E PE=1 SV=4	unknown	NUCLEUS	0.975454	NUCLEUS
Q5T1B5	0.118059	0.105597	0.0896371	0.187801	0.129427	0.105597	0.173371	0.0502842	0.0168343	0.0233931	0.201959	0.0889331	0.15634	0.171791	0.137275	0.0849002	0.0735348	0.033782	0.0195883	0.0318965	0.179293	0.224747	0.186869	0.149767	0.0825563	0.0586636	0.0423465	0.0281663	0.0205905	0.0270008	Q5T1B5	Type I inositol 145-trisphosphate 5-phosphatase OS=Homo sapiens OX=9606 GN=INPP5A PE=1 SV=1	unknown	PM	0.813827	PM
A8MZB2	0.0343123	0.0464558	0.0583169	0.112398	0.0971477	0.128071	0.214205	0.192883	0.101807	0.0144027	0.0581127	0.0430627	0.0971108	0.130726	0.140174	0.107437	0.146985	0.121279	0.103043	0.0520707	0.0330884	0.0480955	0.0827992	0.0980147	0.112344	0.125632	0.198062	0.19233	0.0844146	0.0252202	A8MZB2	N-acetyltransferase 5 (ARD1 homolog S. cerevisiae) isoform CRA_a OS=Homo sapiens OX=9606 GN=NAA20 PE=1 SV=1	unknown	RIBOSOME	0.322304	unknown
G3XAL9	0.0950967	0.123405	0.145141	0.215279	0.134083	0.106913	0.101542	0.0360167	0.0183875	0.0241375	0.119255	0.0874539	0.20099	0.225571	0.146838	0.0823429	0.0583702	0.0192674	0.0140754	0.0458362	0.12165	0.158215	0.210621	0.142473	0.0927568	0.0715353	0.0623692	0.0472253	0.0359669	0.0571884	G3XAL9	Solute carrier family 12 (Sodium/potassium/chloride transporters) member 2 isoform CRA_a OS=Homo sapiens OX=9606 GN=SLC12A2 PE=1 SV=1	unknown	PM	0.443802	unknown
G5EA30	0.0674913	0.0477503	0.053647	0.114665	0.0759518	0.109858	0.256313	0.178567	0.0846045	0.0111524	0.0783319	0.0422654	0.0854466	0.104043	0.130248	0.104959	0.16568	0.16568	0.0888983	0.0344463	0.0963657	0.0662821	0.0852899	0.0880012	0.0956158	0.0966253	0.165849	0.217393	0.0715893	0.0169888	G5EA30	CUG triplet repeat RNA binding protein 1 isoform CRA_c OS=Homo sapiens OX=9606 GN=CELF1 PE=1 SV=1	unknown	NUCLEUS	0.488803	unknown
C9JLU1	0.0866948	0.0458559	0.0610074	0.0781658	0.0670279	0.072346	0.089404	0.145093	0.118001	0.236404	0.0665328	0.0398192	0.0608084	0.0506151	0.0787848	0.0680392	0.062114	0.0794376	0.116495	0.377354	0.0749501	0.0526447	0.0802395	0.056487	0.0637725	0.0488523	0.0632735	0.103443	0.138024	0.318313	C9JLU1	DNA-directed RNA polymerases I II and III subunit RPABC3 (Fragment) OS=Homo sapiens OX=9606 GN=POLR2H PE=1 SV=8	unknown	CYTOSOL	0.540298	unknown
B1AK88	0.0895424	0.0844153	0.0779517	0.124752	0.0764776	0.0866508	0.11406	0.0956982	0.081386	0.169066	0.110727	0.0591723	0.102821	0.0970364	0.0981579	0.0747732	0.0712422	0.0640025	0.0750175	0.247049	0.0684419	0.0854838	0.112579	0.0813491	0.0788244	0.0662648	0.0831237	0.108115	0.0977598	0.218059	B1AK88	Capping protein (Actin filament) muscle Z-line beta isoform CRA_d OS=Homo sapiens OX=9606 GN=CAPZB PE=1 SV=1	unknown	CYTOSOL	0.563595	unknown
Q14573	0.0759502	0.104861	0.158043	0.26105	0.139797	0.101777	0.107945	0.0292086	0.0110666	0.0103021	0.13428	0.0776263	0.181751	0.225254	0.170101	0.0918266	0.0602776	0.0189966	0.0138888	0.0259984	0.139874	0.155382	0.20537	0.151747	0.119423	0.0831056	0.0669827	0.0399063	0.0196651	0.018544	Q14573	Inositol 145-trisphosphate receptor type 3 OS=Homo sapiens OX=9606 GN=ITPR3 PE=1 SV=2	unknown	ER	0.665263	unknown
P62875	0.10702	0.0555833	0.0614752	0.0987904	0.0656213	0.0686764	0.100941	0.155496	0.138506	0.14789	0.0889215	0.0497648	0.0755328	0.070543	0.0943112	0.0725808	0.0714571	0.0930162	0.144228	0.239644	0.107974	0.0793506	0.0952598	0.065919	0.0667014	0.0586816	0.0747865	0.105692	0.140966	0.204668	P62875	DNA-directed RNA polymerases I II and III subunit RPABC5 OS=Homo sapiens OX=9606 GN=POLR2L PE=1 SV=1	unknown	NUCLEUS	0.71525	unknown
Q5T4U5	0.343507	0.444956	0.129091	0.0276418	0.00777426	0.0102697	0.00998176	0.0136289	0.0035512	0.00959785	0.462608	0.318326	0.138834	0.0199079	0.00456639	0.0049269	0.00704987	0.00941318	0.0123773	0.0219908	0.311483	0.392661	0.136025	0.0244905	0.019267	0.014857	0.0161843	0.0226922	0.0281298	0.0342096	Q5T4U5	Acyl-Coenzyme A dehydrogenase C-4 to C-12 straight chain isoform CRA_a OS=Homo sapiens OX=9606 GN=ACADM PE=1 SV=1	unknown	MITOCHONDRIA	0.953229	unknown
Q5T5C7	0.0255197	0.0449107	0.0590709	0.127919	0.0756754	0.0954227	0.131261	0.0605246	0.0567476	0.322948	0.0425544	0.0463457	0.100924	0.0749634	0.105955	0.100392	0.0720225	0.0577668	0.0744437	0.324633	0.0443149	0.0625085	0.120706	0.071441	0.0771292	0.0632529	0.0742882	0.0837045	0.0929347	0.30972	Q5T5C7	Serine--tRNA ligase cytoplasmic OS=Homo sapiens OX=9606 GN=SARS PE=1 SV=1	unknown	CYTOSOL	0.942652	CYTOSOL
P11216	0.0242937	0.0409482	0.0637153	0.12574	0.0703391	0.100929	0.124502	0.0581726	0.0730646	0.318295	0.0296017	0.035439	0.0672175	0.0502521	0.0800636	0.0683157	0.0513893	0.0312514	0.0496957	0.536774	0.029668	0.0552732	0.0852243	0.0586401	0.0621947	0.0497912	0.0633955	0.109294	0.104375	0.382143	P11216	Glycogen phosphorylase brain form OS=Homo sapiens OX=9606 GN=PYGB PE=1 SV=5	unknown	CYTOSOL	0.874807	CYTOSOL
Q9BV57	0.0297326	0.0492972	0.0488189	0.0957399	0.083242	0.0896144	0.0958942	0.0391909	0.0280817	0.440388	0.0594368	0.0661985	0.132634	0.0927725	0.135896	0.118283	0.093931	0.0391281	0.0474502	0.214271	0.0555969	0.0722435	0.147099	0.0896615	0.0907442	0.075451	0.0864269	0.0842074	0.0683458	0.230224	Q9BV57	12-dihydroxy-3-keto-5-methylthiopentene dioxygenase OS=Homo sapiens OX=9606 GN=ADI1 PE=1 SV=1	unknown	CYTOSOL	0.886443	CYTOSOL
P00390	0.0534281	0.0772611	0.0722613	0.11365	0.0657145	0.0971033	0.103314	0.0426887	0.0445047	0.330075	0.0864658	0.0610785	0.0753483	0.0452496	0.0720605	0.0646714	0.044809	0.0316917	0.0389452	0.47968	0.0664297	0.0965103	0.104231	0.0533196	0.052364	0.0480832	0.0477774	0.055804	0.0487329	0.426748	P00390	Glutathione reductase mitochondrial OS=Homo sapiens OX=9606 GN=GSR PE=1 SV=2	unknown	CYTOSOL	0.867668	CYTOSOL
F8W809	0.0362795	0.0595679	0.0905127	0.122166	0.065452	0.123407	0.123921	0.0518228	0.0728249	0.254045	0.039556	0.0408055	0.0815069	0.0581002	0.0855676	0.078352	0.0556533	0.0378588	0.0503223	0.472277	0.0443172	0.0604754	0.113503	0.0678978	0.064684	0.0565347	0.0604117	0.0681528	0.0697852	0.394238	F8W809	Thioredoxin reductase 1 cytoplasmic OS=Homo sapiens OX=9606 GN=TXNRD1 PE=1 SV=1	unknown	CYTOSOL	0.89005	CYTOSOL
P23381	0.0327844	0.0493723	0.0701448	0.1374	0.0754583	0.110185	0.137896	0.0626637	0.0762411	0.247855	0.0382532	0.0445444	0.0830276	0.0673974	0.102522	0.0834646	0.0698586	0.0475922	0.0607727	0.402567	0.0382246	0.0599601	0.116818	0.0720741	0.0753423	0.0605963	0.0717778	0.0805016	0.0795691	0.345137	P23381	Tryptophan--tRNA ligase cytoplasmic OS=Homo sapiens OX=9606 GN=WARS PE=1 SV=2	unknown	CYTOSOL	0.919632	CYTOSOL
Q01581	0.0290377	0.0534373	0.0723106	0.11625	0.0800696	0.114535	0.121837	0.034342	0.0427548	0.335426	0.0356287	0.0491968	0.0921426	0.0710023	0.112982	0.0932634	0.072278	0.0302616	0.0347539	0.408491	0.041241	0.0807991	0.128178	0.0785915	0.0846203	0.061317	0.0695632	0.0717708	0.0562782	0.327641	Q01581	Hydroxymethylglutaryl-CoA synthase cytoplasmic OS=Homo sapiens OX=9606 GN=HMGCS1 PE=1 SV=2	unknown	CYTOSOL	0.941961	CYTOSOL
P49589-3	0.0439951	0.061206	0.0721903	0.130254	0.0749072	0.0892962	0.122156	0.0675435	0.0672579	0.271194	0.066185	0.0542549	0.0936174	0.0733916	0.098484	0.0833116	0.0652888	0.0474217	0.066465	0.35158	0.0561267	0.067006	0.109615	0.068448	0.0718181	0.0611364	0.0690782	0.0882999	0.109738	0.298734	P49589-3	Isoform 3 of Cysteine--tRNA ligase cytoplasmic OS=Homo sapiens OX=9606 GN=CARS	unknown	CYTOSOL	0.912416	CYTOSOL
Q9HB07	0.0414791	0.0763344	0.0769132	0.116141	0.068746	0.100514	0.114341	0.0225723	0.0295177	0.353441	0.0651756	0.0726191	0.114965	0.0890021	0.124582	0.11639	0.0873994	0.0482228	0.0511432	0.230501	0.0623971	0.101817	0.144423	0.0907201	0.0923401	0.0765721	0.0873181	0.0823231	0.0665011	0.195588	Q9HB07	UPF0160 protein MYG1 mitochondrial OS=Homo sapiens OX=9606 GN=C12orf10 PE=1 SV=2	unknown	CYTOSOL	0.906603	CYTOSOL
Q9NQ88	0.0382923	0.048232	0.0493727	0.105589	0.0729998	0.0933681	0.115529	0.0632231	0.0632231	0.350171	0.0337711	0.0318949	0.0880096	0.0440048	0.0561146	0.0736824	0.0429814	0.0310421	0.0395702	0.558929	0.0435849	0.0576415	0.105142	0.0566981	0.0607547	0.0576887	0.0593868	0.0749528	0.0571698	0.426981	Q9NQ88	Fructose-26-bisphosphatase TIGAR OS=Homo sapiens OX=9606 GN=TIGAR PE=1 SV=1	unknown	CYTOSOL	0.875003	CYTOSOL
Q14533	0.0477868	0.0614624	0.0824236	0.113083	0.0989418	0.0822325	0.115818	0.0525046	0.0536631	0.292084	0.044366	0.0534731	0.0862785	0.0772625	0.108526	0.0915803	0.0869318	0.0370058	0.0457408	0.368835	0.0426699	0.0688535	0.144915	0.0848938	0.08385	0.0745452	0.06326	0.0644554	0.0646695	0.307887	Q14533	Keratin type II cuticular Hb1 OS=Homo sapiens OX=9606 GN=KRT81 PE=1 SV=3	unknown	CYTOSOL	0.916263	CYTOSOL
Q04446	0.0296401	0.0533229	0.0619659	0.13067	0.0702183	0.112652	0.133161	0.0284194	0.0365741	0.343376	0.0353429	0.0391979	0.0748648	0.0533545	0.0859114	0.0703619	0.0567236	0.0284428	0.0341443	0.521656	0.035259	0.0598559	0.104378	0.0612283	0.0670344	0.0541026	0.0618617	0.0607532	0.0549999	0.440527	Q04446	14-alpha-glucan-branching enzyme OS=Homo sapiens OX=9606 GN=GBE1 PE=1 SV=3	CYTOSOL	CYTOSOL	1	CYTOSOL
P17174	0.0314558	0.0512684	0.0648895	0.104721	0.0759137	0.106647	0.1105	0.0334509	0.0331585	0.387996	0.0370015	0.047477	0.0927169	0.0734349	0.104755	0.101168	0.0764533	0.0355456	0.035084	0.396364	0.0446902	0.0677377	0.118497	0.0729199	0.0716926	0.0579186	0.0640692	0.0596642	0.0542501	0.388561	P17174	Aspartate aminotransferase cytoplasmic OS=Homo sapiens OX=9606 GN=GOT1 PE=1 SV=3	CYTOSOL	CYTOSOL	1	CYTOSOL
P33316	0.0397593	0.05072	0.0686296	0.0946343	0.0745039	0.0828856	0.0910524	0.0465649	0.0353894	0.415861	0.0606311	0.0590475	0.0923702	0.080308	0.113024	0.116781	0.0977442	0.046244	0.0515676	0.282282	0.0349044	0.0634653	0.105112	0.0696249	0.0778377	0.0541187	0.0622702	0.0600331	0.0464881	0.426146	P33316	Deoxyuridine 5'-triphosphate nucleotidohydrolase mitochondrial OS=Homo sapiens OX=9606 GN=DUT PE=1 SV=4	unknown	CYTOSOL	0.863349	CYTOSOL
P26639	0.0292469	0.0451297	0.0626146	0.134265	0.0695882	0.0978514	0.13196	0.0456813	0.0479192	0.335743	0.0379232	0.043562	0.0844112	0.0644562	0.100703	0.0810388	0.0620617	0.0344731	0.0462436	0.445127	0.0404138	0.0642002	0.102715	0.0641472	0.0703898	0.0518846	0.0597109	0.0668408	0.0803694	0.399328	P26639	Threonine--tRNA ligase cytoplasmic OS=Homo sapiens OX=9606 GN=TARS PE=1 SV=3	CYTOSOL	CYTOSOL	1	CYTOSOL
O60547	0.0246061	0.0459873	0.0650812	0.134297	0.0793732	0.0970606	0.122846	0.0796005	0.0824703	0.268678	0.0387622	0.0436183	0.0934013	0.068174	0.0960876	0.0887691	0.0657288	0.068484	0.091421	0.345554	0.0467227	0.072557	0.118223	0.0779352	0.0828812	0.0660264	0.0705402	0.0747179	0.0709724	0.319424	O60547	GDP-mannose 46 dehydratase OS=Homo sapiens OX=9606 GN=GMDS PE=1 SV=1	unknown	CYTOSOL	0.924132	CYTOSOL
Q9BZ23	0.0370048	0.0402699	0.06835	0.120374	0.0491946	0.0922943	0.125599	0.0753156	0.0759687	0.315629	0.0393095	0.0386497	0.0681731	0.0611908	0.0762549	0.0772445	0.0641597	0.0672934	0.0771895	0.430535	0.0466152	0.0640009	0.0947517	0.0608497	0.0570466	0.0565033	0.0654135	0.0687819	0.0695425	0.416495	Q9BZ23	Pantothenate kinase 2 mitochondrial OS=Homo sapiens OX=9606 GN=PANK2 PE=1 SV=3	unknown	CYTOSOL	0.903614	CYTOSOL
O43776	0.024586	0.0394256	0.0601179	0.123898	0.0667141	0.0971688	0.136578	0.0664742	0.0746536	0.310384	0.034395	0.0375001	0.0768818	0.0609369	0.0894479	0.0781227	0.0661276	0.0489068	0.0650265	0.442655	0.0366662	0.0605053	0.102465	0.0638401	0.0695589	0.0551903	0.0658332	0.0792986	0.0980442	0.368598	O43776	Asparagine--tRNA ligase cytoplasmic OS=Homo sapiens OX=9606 GN=NARS PE=1 SV=1	unknown	CYTOSOL	0.926136	CYTOSOL
A0A087WY55	0.0371843	0.0636217	0.0766255	0.140355	0.0849006	0.108544	0.122622	0.0412681	0.0429876	0.281891	0.0537488	0.0579217	0.102962	0.0799202	0.100195	0.0762008	0.0674468	0.0340636	0.0431351	0.384406	0.0476462	0.0824078	0.131128	0.0802604	0.0738181	0.0638191	0.054726	0.0553971	0.0540885	0.356709	A0A087WY55	Chromosome 6 open reading frame 55 isoform CRA_b OS=Homo sapiens OX=9606 GN=VTA1 PE=1 SV=1	unknown	CYTOSOL	0.919007	CYTOSOL
P12081	0.0471522	0.0708304	0.0743821	0.125786	0.0613999	0.101991	0.134948	0.0576849	0.0689175	0.256908	0.0866067	0.0754163	0.105427	0.0770438	0.11415	0.0882407	0.0681839	0.0517075	0.0677608	0.265464	0.0615846	0.0926462	0.112156	0.0717339	0.0746105	0.0576978	0.0676508	0.091853	0.0986373	0.27143	P12081	Histidine--tRNA ligase cytoplasmic OS=Homo sapiens OX=9606 GN=HARS PE=1 SV=2	unknown	CYTOSOL	0.881158	CYTOSOL
P54687	0.0273548	0.0457959	0.0581582	0.0909489	0.0782944	0.0994535	0.093813	0.0312418	0.0288745	0.446065	0.0451482	0.0536288	0.114978	0.0854678	0.132626	0.116547	0.0925268	0.0409814	0.0404667	0.277629	0.0469881	0.0850845	0.147652	0.0872386	0.0902693	0.0775204	0.0838071	0.0846838	0.0700313	0.226725	P54687	Branched-chain-amino-acid aminotransferase cytosolic OS=Homo sapiens OX=9606 GN=BCAT1 PE=1 SV=3	CYTOSOL	CYTOSOL	1	CYTOSOL
P49588	0.0269607	0.0484211	0.0712609	0.137653	0.0737448	0.115926	0.125723	0.0315689	0.0351348	0.333606	0.0289089	0.0371034	0.0711954	0.0536648	0.0825483	0.0703023	0.0568183	0.0253648	0.0283102	0.545784	0.0396028	0.0695175	0.116618	0.0707425	0.0728994	0.0560306	0.0625775	0.0616694	0.0521936	0.398149	P49588	Alanine--tRNA ligase cytoplasmic OS=Homo sapiens OX=9606 GN=AARS PE=1 SV=2	CYTOSOL	CYTOSOL	1	CYTOSOL
O43924	0.0440887	0.0510432	0.0698071	0.102874	0.070332	0.0845033	0.0952631	0.0948694	0.0738748	0.313345	0.0461117	0.0426221	0.0595713	0.0550847	0.0889831	0.105184	0.0660518	0.0595713	0.0847458	0.392074	0.0385517	0.0700745	0.0841321	0.0694356	0.0626198	0.0673056	0.0700745	0.0896699	0.0745474	0.373589	O43924	Retinal rod rhodopsin-sensitive cGMP 3'5'-cyclic phosphodiesterase subunit delta OS=Homo sapiens OX=9606 GN=PDE6D PE=1 SV=1	unknown	CYTOSOL	0.9041	CYTOSOL
P54577	0.0438991	0.0499794	0.0680259	0.134576	0.0693724	0.0945171	0.123725	0.0637225	0.0651986	0.286985	0.0503682	0.0445217	0.0791855	0.0639544	0.0954382	0.0805707	0.0658648	0.0495948	0.0598509	0.410651	0.0497546	0.0639399	0.102439	0.0620906	0.0653744	0.0537038	0.062285	0.0753124	0.0756667	0.389434	P54577	Tyrosine--tRNA ligase cytoplasmic OS=Homo sapiens OX=9606 GN=YARS PE=1 SV=4	CYTOSOL	CYTOSOL	1	CYTOSOL
P06737	0.0274448	0.0431072	0.0640949	0.12498	0.0714203	0.0984079	0.119719	0.0627139	0.0743994	0.313713	0.0319744	0.0360095	0.0686663	0.0551373	0.0817083	0.0674675	0.054916	0.0407085	0.0625288	0.500883	0.0337232	0.052032	0.0898838	0.0554431	0.0611142	0.0489614	0.0616211	0.091926	0.0968625	0.408433	P06737	Glycogen phosphorylase liver form OS=Homo sapiens OX=9606 GN=PYGL PE=1 SV=4	unknown	CYTOSOL	0.894125	CYTOSOL
P40925	0.0292522	0.0573936	0.0857664	0.155287	0.0802955	0.0965971	0.12784	0.0359173	0.0372225	0.294429	0.0438454	0.0495647	0.104305	0.0874111	0.105599	0.0820593	0.0661954	0.0389728	0.0468168	0.37523	0.0431518	0.0704901	0.126696	0.0745631	0.0802128	0.0590405	0.0665296	0.0700678	0.0646433	0.344605	P40925	Malate dehydrogenase cytoplasmic OS=Homo sapiens OX=9606 GN=MDH1 PE=1 SV=4	CYTOSOL	CYTOSOL	1	CYTOSOL
P34896	0.0299485	0.0432951	0.0664075	0.122127	0.0762998	0.0893028	0.11851	0.0948368	0.100009	0.259264	0.0449938	0.0421027	0.085848	0.0645914	0.0959014	0.083729	0.0691417	0.0795729	0.106842	0.327277	0.0473796	0.0711158	0.0950996	0.0686246	0.0711313	0.0614294	0.072756	0.0952543	0.104399	0.31281	P34896	Serine hydroxymethyltransferase cytosolic OS=Homo sapiens OX=9606 GN=SHMT1 PE=1 SV=1	CYTOSOL	CYTOSOL	1	CYTOSOL
J3KQ48	0.100551	0.162944	0.150325	0.260591	0.139259	0.0851277	0.0597396	0.0174261	0.00871307	0.015323	0.101489	0.101668	0.220429	0.247469	0.173615	0.0653365	0.0498511	0.0123883	0.00696843	0.0207862	0.095776	0.166095	0.24997	0.182112	0.129261	0.0790737	0.0570864	0.0204543	0.0104894	0.00968249	J3KQ48	Peptidyl-tRNA hydrolase 2 mitochondrial OS=Homo sapiens OX=9606 GN=PTRH2 PE=1 SV=1	unknown	ER	0.922641	ER
Q6NUM9	0.0653416	0.118574	0.150503	0.256797	0.160555	0.0973269	0.080249	0.0276445	0.0191341	0.0238748	0.0707769	0.0903471	0.230545	0.270083	0.174347	0.076	0.0450248	0.0118678	0.0113058	0.0197025	0.0783007	0.125156	0.241635	0.192975	0.138137	0.0986395	0.0688602	0.0261697	0.0163821	0.0137443	Q6NUM9	All-trans-retinol 1314-reductase OS=Homo sapiens OX=9606 GN=RETSAT PE=1 SV=2	unknown	ER	0.937058	ER
A0A0J9YXF2	0.0562887	0.121215	0.208008	0.265324	0.133064	0.0897152	0.0766785	0.0174999	0.011688	0.0205183	0.0642659	0.0901421	0.220712	0.250977	0.186484	0.0873676	0.0550931	0.0101636	0.00874809	0.0260461	0.0689755	0.175486	0.235755	0.183322	0.126439	0.0749734	0.0519493	0.0358905	0.0233143	0.0238947	A0A0J9YXF2	Paraoxonase 2 isoform CRA_a OS=Homo sapiens OX=9606 GN=PON2 PE=1 SV=1	unknown	ER	0.934479	ER
A0A0G2JJD3	0.066923	0.127538	0.175322	0.258706	0.151171	0.0939687	0.0712434	0.0397477	0.00781993	0.0075607	0.0804279	0.0930269	0.204041	0.2687	0.183518	0.0927892	0.0514263	0.00911252	0.00784469	0.00911252	0.0998013	0.133846	0.241597	0.17584	0.141277	0.0915061	0.073274	0.0249719	0.0102826	0.00760391	A0A0G2JJD3	HLA-B associated transcript 5 isoform CRA_b OS=Homo sapiens OX=9606 GN=ABHD16A PE=1 SV=1	unknown	ER	0.941122	ER
Q6Y288	0.0880472	0.150025	0.0983768	0.233153	0.166257	0.0855878	0.0609936	0.063453	0.0280374	0.0260698	0.065144	0.104736	0.234608	0.254273	0.159909	0.0658838	0.0398385	0.0253364	0.0251668	0.0251052	0.0577291	0.13993	0.259888	0.200851	0.137133	0.0788266	0.0532908	0.028363	0.0176015	0.026387	Q6Y288	Beta-13-glucosyltransferase OS=Homo sapiens OX=9606 GN=B3GLCT PE=1 SV=2	ER	ER	1	ER
Q15738	0.0593463	0.108385	0.182856	0.297991	0.155324	0.0902236	0.0802972	0.0163757	0.00570257	0.00349914	0.0691014	0.0850329	0.226957	0.260754	0.183383	0.0790251	0.0534253	0.0145694	0.00977781	0.0179746	0.0840508	0.119805	0.239569	0.18772	0.143105	0.0929616	0.0737753	0.0321211	0.0148915	0.0120015	Q15738	Sterol-4-alpha-carboxylate 3-dehydrogenase decarboxylating OS=Homo sapiens OX=9606 GN=NSDHL PE=1 SV=2	ER	ER	1	ER
P26572	0.0765672	0.184941	0.175573	0.156527	0.0834297	0.0661192	0.132316	0.088673	0.0256381	0.0102167	0.123293	0.118507	0.223411	0.187923	0.0991504	0.0634477	0.0911926	0.0632326	0.0242499	0.005592	0.0896548	0.21152	0.297346	0.124384	0.0651033	0.0404994	0.0560277	0.068933	0.0324205	0.0141118	P26572	Alpha-13-mannosyl-glycoprotein 2-beta-N-acetylglucosaminyltransferase OS=Homo sapiens OX=9606 GN=MGAT1 PE=1 SV=2	GOLGI	GOLGI	1	GOLGI
Q9BYC5	0.0772447	0.175469	0.167914	0.184199	0.0817928	0.0692488	0.137911	0.0763644	0.0206133	0.00924296	0.11484	0.11028	0.21672	0.18688	0.1154	0.07352	0.0888	0.05956	0.02424	0.00976	0.095639	0.187049	0.296573	0.12321	0.0674301	0.049196	0.0530264	0.0750908	0.0352711	0.0175159	Q9BYC5	Alpha-(16)-fucosyltransferase OS=Homo sapiens OX=9606 GN=FUT8 PE=1 SV=2	unknown	GOLGI	0.795086	GOLGI
G5E994	0.0597291	0.161022	0.169797	0.165333	0.0883621	0.0849754	0.154249	0.0723522	0.03125	0.012931	0.10607	0.101597	0.164473	0.1577	0.117827	0.084984	0.100703	0.0676038	0.0452396	0.0538019	0.0885298	0.178903	0.278307	0.145666	0.076304	0.0433126	0.0487191	0.0957793	0.0411009	0.003379	G5E994	G protein-coupled receptor 107 isoform CRA_c OS=Homo sapiens OX=9606 GN=GPR107 PE=1 SV=1	unknown	GOLGI	0.650398	GOLGI
O60476	0.0815517	0.165969	0.156381	0.158585	0.0804496	0.0675557	0.142715	0.0988539	0.0261186	0.0218206	0.128128	0.110066	0.199686	0.181562	0.117215	0.0736908	0.0947632	0.0601442	0.0203826	0.0143619	0.102417	0.204118	0.278603	0.124799	0.0646374	0.0499552	0.0589078	0.0682184	0.0347359	0.0136079	O60476	Mannosyl-oligosaccharide 12-alpha-mannosidase IB OS=Homo sapiens OX=9606 GN=MAN1A2 PE=1 SV=1	GOLGI	GOLGI	1	GOLGI
G5EA09	0.0648225	0.13586	0.149298	0.194774	0.0991377	0.0786537	0.109861	0.0625027	0.0374229	0.0676675	0.0993415	0.11524	0.18429	0.168015	0.122578	0.080715	0.0676388	0.0430856	0.0485419	0.070555	0.0763042	0.126978	0.222891	0.122609	0.0983641	0.0699099	0.0479032	0.0656471	0.0572814	0.112112	G5EA09	Syndecan binding protein (Syntenin) isoform CRA_a OS=Homo sapiens OX=9606 GN=SDCBP PE=1 SV=1	unknown	GOLGI	0.485611	GOLGI
P15291	0.0922713	0.211928	0.219487	0.165593	0.0728429	0.0561825	0.09967	0.0603343	0.0162879	0.00540267	0.142452	0.1379	0.233731	0.195338	0.103925	0.055381	0.0737969	0.0402407	0.0114837	0.00575139	0.0834096	0.221623	0.297435	0.130294	0.0675726	0.0389823	0.040974	0.0779164	0.0330394	0.00875375	P15291	Beta-14-galactosyltransferase 1 OS=Homo sapiens OX=9606 GN=B4GALT1 PE=1 SV=5	unknown	GOLGI	0.564647	GOLGI
Q10469	0.0715185	0.165525	0.175761	0.156686	0.090398	0.0733924	0.144352	0.0892233	0.0292283	0.00391576	0.11452	0.102122	0.221251	0.181674	0.112056	0.0647699	0.0820154	0.0575379	0.0326631	0.0313916	0.0940032	0.171424	0.252487	0.126026	0.0813353	0.0562714	0.0648073	0.0789974	0.04692	0.0277279	Q10469	Alpha-16-mannosyl-glycoprotein 2-beta-N-acetylglucosaminyltransferase OS=Homo sapiens OX=9606 GN=MGAT2 PE=1 SV=1	unknown	GOLGI	0.801239	GOLGI
Q9UKM7	0.0949404	0.170044	0.157076	0.159585	0.101154	0.0712053	0.116205	0.0906565	0.0204546	0.0186793	0.120063	0.116509	0.232903	0.177928	0.112802	0.0660342	0.0848281	0.0604856	0.02277	0.00567652	0.0915857	0.18731	0.274629	0.122863	0.0741026	0.0523209	0.0544061	0.0785937	0.04058	0.0236102	Q9UKM7	Endoplasmic reticulum mannosyl-oligosaccharide 12-alpha-mannosidase OS=Homo sapiens OX=9606 GN=MAN1B1 PE=1 SV=2	unknown	GOLGI	0.795657	GOLGI
O00330	0.325003	0.425314	0.127145	0.0269492	0.0102499	0.0131291	0.0169296	0.0224577	0.0117471	0.0210757	0.43308	0.254588	0.139772	0.0359781	0.00990376	0.0199194	0.0174575	0.0279767	0.0260184	0.0353066	0.362372	0.351977	0.136685	0.0229089	0.0147755	0.0130509	0.0136335	0.0260318	0.0273602	0.0312056	O00330	Pyruvate dehydrogenase protein X component mitochondrial OS=Homo sapiens OX=9606 GN=PDHX PE=1 SV=3	MITOCHONDRIA	MITOCHONDRIA	1	MITOCHONDRIA
Q13423	0.309247	0.422007	0.134983	0.0348865	0.0134632	0.014474	0.0178574	0.0176187	0.0166922	0.0187699	0.459903	0.274047	0.161124	0.0373754	0.00900326	0.00857547	0.0104643	0.0102142	0.00968113	0.0196124	0.341123	0.409298	0.152991	0.0233372	0.0125868	0.010771	0.0105027	0.0111011	0.010771	0.0175183	Q13423	NAD(P) transhydrogenase mitochondrial OS=Homo sapiens OX=9606 GN=NNT PE=1 SV=3	MITOCHONDRIA	MITOCHONDRIA	1	MITOCHONDRIA
Q9UIJ7	0.324652	0.448971	0.129606	0.0293709	0.0075421	0.00845353	0.0124866	0.014674	0.0111195	0.0131246	0.461726	0.308361	0.137941	0.0266717	0.0100891	0.00768488	0.00919824	0.0107116	0.0118171	0.0157991	0.364279	0.403118	0.144602	0.0219484	0.0108707	0.00665552	0.00797184	0.0100572	0.0121131	0.018384	Q9UIJ7	GTP:AMP phosphotransferase AK3 mitochondrial OS=Homo sapiens OX=9606 GN=AK3 PE=1 SV=4	unknown	MITOCHONDRIA	0.954923	MITOCHONDRIA
Q9HA77	0.337597	0.389155	0.107432	0.0421408	0.0155379	0.0136546	0.015224	0.0297418	0.0232284	0.0262889	0.406758	0.228467	0.162703	0.0430083	0.0282171	0.0174081	0.0119468	0.0286722	0.038002	0.0348162	0.37429	0.359592	0.143184	0.0258671	0.0143706	0.0119538	0.0137174	0.0171141	0.0205108	0.0194004	Q9HA77	Probable cysteine--tRNA ligase mitochondrial OS=Homo sapiens OX=9606 GN=CARS2 PE=1 SV=1	unknown	MITOCHONDRIA	0.956088	MITOCHONDRIA
Q16836	0.29932	0.407041	0.135352	0.048983	0.0155407	0.0139062	0.0204442	0.0184983	0.0254255	0.0154888	0.459418	0.289479	0.153191	0.026487	0.0111137	0.00931304	0.00931304	0.0121399	0.0109394	0.0186067	0.3303	0.435285	0.143194	0.0245169	0.0126896	0.00920483	0.00878243	0.012408	0.00955683	0.0140624	Q16836	Hydroxyacyl-coenzyme A dehydrogenase mitochondrial OS=Homo sapiens OX=9606 GN=HADH PE=1 SV=3	MITOCHONDRIA	MITOCHONDRIA	1	MITOCHONDRIA
P24539	0.352261	0.422539	0.121838	0.0314389	0.010399	0.00967352	0.0135429	0.0147037	0.0117533	0.0118501	0.454953	0.292553	0.158653	0.0394258	0.010028	0.0044862	0.0062279	0.005964	0.00754737	0.0201615	0.263535	0.349042	0.152851	0.026119	0.0204686	0.0185659	0.0176433	0.0186043	0.0236205	0.10955	P24539	ATP synthase F(0) complex subunit B1 mitochondrial OS=Homo sapiens OX=9606 GN=ATP5F1 PE=1 SV=2	MITOCHONDRIA	MITOCHONDRIA	1	MITOCHONDRIA
P43304	0.346612	0.417094	0.128491	0.047916	0.0104282	0.00727626	0.00868457	0.0115683	0.00794689	0.0139825	0.447944	0.291568	0.166122	0.035977	0.00913121	0.00693972	0.0106586	0.00713894	0.00722195	0.0172995	0.341864	0.403158	0.155752	0.0281677	0.0133496	0.0087726	0.010756	0.0103746	0.0116714	0.016134	P43304	Glycerol-3-phosphate dehydrogenase mitochondrial OS=Homo sapiens OX=9606 GN=GPD2 PE=1 SV=3	MITOCHONDRIA	MITOCHONDRIA	1	MITOCHONDRIA
P23786	0.326294	0.404923	0.117368	0.0419959	0.0156587	0.0145094	0.0196332	0.0261457	0.0192501	0.0142221	0.465164	0.283339	0.163443	0.0335733	0.00790819	0.00607199	0.00699009	0.00684403	0.00853417	0.0181325	0.320749	0.387804	0.145452	0.0310078	0.0200517	0.0147804	0.015323	0.0182687	0.0177261	0.0288372	P23786	Carnitine O-palmitoyltransferase 2 mitochondrial OS=Homo sapiens OX=9606 GN=CPT2 PE=1 SV=2	MITOCHONDRIA	MITOCHONDRIA	1	MITOCHONDRIA
P23368	0.295494	0.421193	0.136182	0.0511515	0.012946	0.0090189	0.0180378	0.0226637	0.0162074	0.017106	0.433362	0.263106	0.157295	0.03833	0.0151537	0.0130095	0.0131782	0.0199721	0.020213	0.0263805	0.31593	0.421571	0.141239	0.0253286	0.0145631	0.0100059	0.0104683	0.0120203	0.0157519	0.033122	P23368	NAD-dependent malic enzyme mitochondrial OS=Homo sapiens OX=9606 GN=ME2 PE=1 SV=1	MITOCHONDRIA	MITOCHONDRIA	1	MITOCHONDRIA
P21912	0.32214	0.417703	0.140155	0.0479113	0.0132943	0.00984555	0.0118851	0.00960451	0.0112732	0.0161868	0.454651	0.281333	0.166975	0.0371769	0.0117351	0.00667522	0.00764918	0.00843311	0.00612885	0.0192417	0.405284	0.332805	0.169597	0.027288	0.0126288	0.00896395	0.0084687	0.0106973	0.0118116	0.0124554	P21912	Succinate dehydrogenase [ubiquinone] iron-sulfur subunit mitochondrial OS=Homo sapiens OX=9606 GN=SDHB PE=1 SV=3	MITOCHONDRIA	MITOCHONDRIA	1	MITOCHONDRIA
A0A087X2D5	0.31271	0.427973	0.144152	0.0420422	0.0144687	0.00837921	0.00998685	0.0131534	0.0183173	0.00881765	0.449613	0.275039	0.145128	0.0356325	0.0122487	0.0115682	0.00890813	0.0115682	0.0178781	0.0324157	0.334052	0.405472	0.134382	0.0365766	0.0154763	0.00701932	0.00655419	0.0179289	0.0314178	0.011121	A0A087X2D5	39S ribosomal protein L45 mitochondrial OS=Homo sapiens OX=9606 GN=MRPL45 PE=1 SV=1	unknown	MITOCHONDRIA	0.960313	MITOCHONDRIA
Q5JTZ9	0.377962	0.421475	0.129954	0.0221018	0.00536606	0.00377218	0.00807566	0.0115291	0.00664116	0.0131229	0.457567	0.276034	0.152732	0.0378076	0.0116251	0.00841334	0.00914645	0.00781986	0.00848316	0.0303718	0.352483	0.394505	0.151484	0.0204232	0.0151337	0.0108728	0.00734646	0.0107258	0.00896268	0.0280635	Q5JTZ9	Alanine--tRNA ligase mitochondrial OS=Homo sapiens OX=9606 GN=AARS2 PE=1 SV=1	MITOCHONDRIA	MITOCHONDRIA	1	MITOCHONDRIA
Q9P0J1	0.318831	0.399648	0.108613	0.0391048	0.0185198	0.0167931	0.0237337	0.0279659	0.0240385	0.0227519	0.400146	0.258172	0.150024	0.048951	0.0267523	0.0156936	0.0129289	0.0176451	0.0234998	0.0461864	0.292006	0.315727	0.14114	0.0436467	0.0232466	0.022535	0.0298885	0.0413537	0.0373211	0.0531351	Q9P0J1	[Pyruvate dehydrogenase [acetyl-transferring]]-phosphatase 1 mitochondrial OS=Homo sapiens OX=9606 GN=PDP1 PE=1 SV=3	MITOCHONDRIA	MITOCHONDRIA	1	MITOCHONDRIA
Q5JPH6	0.29272	0.324287	0.115084	0.0503203	0.019802	0.0199185	0.0340128	0.062551	0.058707	0.0225976	0.404116	0.250878	0.142606	0.0369684	0.0203863	0.0170698	0.0246781	0.0314085	0.0309208	0.0409676	0.307888	0.34247	0.134343	0.0315538	0.0250199	0.0208765	0.0235857	0.0301195	0.0170518	0.0670916	Q5JPH6	Probable glutamate--tRNA ligase mitochondrial OS=Homo sapiens OX=9606 GN=EARS2 PE=1 SV=2	MITOCHONDRIA	MITOCHONDRIA	1	MITOCHONDRIA
P28331	0.347191	0.415154	0.10652	0.0358473	0.0161601	0.0118444	0.0154956	0.0164157	0.0146777	0.0206949	0.45791	0.280394	0.154799	0.0340249	0.0127905	0.00860244	0.00853453	0.00925329	0.00977396	0.0239171	0.339588	0.405371	0.147635	0.024875	0.0142228	0.00957255	0.0102697	0.012293	0.0124035	0.0237699	P28331	NADH-ubiquinone oxidoreductase 75 kDa subunit mitochondrial OS=Homo sapiens OX=9606 GN=NDUFS1 PE=1 SV=3	MITOCHONDRIA	MITOCHONDRIA	1	MITOCHONDRIA
O43181	0.28762	0.505562	0.152127	0.0290967	0.00211144	0.00561335	0.00643733	0.00525286	0.00113297	0.00504686	0.444422	0.289717	0.140098	0.0373707	0.0183611	0.0129688	0.0126617	0.0126958	0.0110918	0.0206136	0.244116	0.507755	0.141227	0.0341988	0.0170994	0.0102011	0.00999206	0.0108282	0.0113299	0.0132531	O43181	NADH dehydrogenase [ubiquinone] iron-sulfur protein 4 mitochondrial OS=Homo sapiens OX=9606 GN=NDUFS4 PE=1 SV=1	MITOCHONDRIA	MITOCHONDRIA	1	MITOCHONDRIA
Q96HY7	0.306404	0.373796	0.123551	0.0493585	0.0218971	0.0213818	0.0319439	0.0272039	0.0166933	0.0277706	0.399974	0.241784	0.163551	0.0483696	0.021728	0.0163997	0.0194627	0.0234191	0.0250463	0.0402655	0.341348	0.328369	0.147281	0.0347281	0.0191388	0.0144237	0.0182166	0.0290213	0.0302392	0.0372336	Q96HY7	Probable 2-oxoglutarate dehydrogenase E1 component DHKTD1 mitochondrial OS=Homo sapiens OX=9606 GN=DHTKD1 PE=1 SV=2	unknown	MITOCHONDRIA	0.961416	MITOCHONDRIA
P26440	0.324202	0.447265	0.135629	0.0302421	0.00628299	0.00971768	0.0115607	0.0113931	0.0104716	0.0132362	0.482782	0.290568	0.142197	0.0206256	0.00672545	0.00848382	0.00712333	0.00677679	0.00784208	0.0268761	0.381262	0.358242	0.150101	0.0309614	0.0169807	0.00709818	0.00772564	0.0111963	0.0120002	0.0244319	P26440	Isovaleryl-CoA dehydrogenase mitochondrial OS=Homo sapiens OX=9606 GN=IVD PE=1 SV=1	MITOCHONDRIA	MITOCHONDRIA	1	MITOCHONDRIA
P82675	0.307405	0.377592	0.109594	0.0435287	0.0169994	0.016613	0.0244688	0.0365744	0.0359305	0.0312943	0.433485	0.245449	0.157228	0.0347841	0.0189324	0.012995	0.0124349	0.0188764	0.0286226	0.0371926	0.323326	0.368995	0.135994	0.0159993	0.0179772	0.0211859	0.0213617	0.0266801	0.0353831	0.0330974	P82675	28S ribosomal protein S5 mitochondrial OS=Homo sapiens OX=9606 GN=MRPS5 PE=1 SV=2	unknown	MITOCHONDRIA	0.960464	MITOCHONDRIA
Q9NYY8	0.315019	0.374533	0.119651	0.0460116	0.0200457	0.0256543	0.0288741	0.0236809	0.0176568	0.0288741	0.477264	0.274994	0.146419	0.0289451	0.0114463	0.0075577	0.00994104	0.0119481	0.0116972	0.019788	0.374371	0.384439	0.146453	0.0324943	0.00800915	0.00800915	0.0185355	0.0100686	0.0102975	0.00732265	Q9NYY8	FAST kinase domain-containing protein 2 mitochondrial OS=Homo sapiens OX=9606 GN=FASTKD2 PE=1 SV=1	unknown	MITOCHONDRIA	0.955546	MITOCHONDRIA
Q04837	0.340314	0.442643	0.132598	0.0212194	0.00605387	0.00796887	0.0145478	0.0129726	0.011212	0.0104707	0.380854	0.318837	0.172982	0.0349166	0.00972541	0.0101226	0.0104301	0.0118909	0.0125828	0.0376587	0.453358	0.338894	0.11658	0.0270548	0.0126132	0.00716942	0.00842252	0.00996323	0.00996323	0.0159823	Q04837	Single-stranded DNA-binding protein mitochondrial OS=Homo sapiens OX=9606 GN=SSBP1 PE=1 SV=1	MITOCHONDRIA	MITOCHONDRIA	1	MITOCHONDRIA
Q5T440	0.314979	0.415534	0.158946	0.0479889	0.0128988	0.0074896	0.00762829	0.0192788	0.0126214	0.00263523	0.441575	0.266209	0.172115	0.047318	0.0166155	0.00379267	0.00740473	0.00903016	0.00921076	0.0267293	0.383628	0.354268	0.131052	0.0371379	0.0122497	0.0141941	0.0145829	0.0200272	0.0126385	0.0202217	Q5T440	Putative transferase CAF17 mitochondrial OS=Homo sapiens OX=9606 GN=IBA57 PE=1 SV=1	unknown	MITOCHONDRIA	0.955085	MITOCHONDRIA
P27144	0.369692	0.423346	0.12328	0.0190623	0.00610878	0.00949437	0.0114816	0.0109664	0.00875837	0.0178111	0.467705	0.287781	0.150346	0.0201124	0.00509016	0.00859741	0.00918713	0.0100251	0.00940439	0.0317515	0.323597	0.42153	0.138802	0.0209057	0.0137801	0.0118368	0.0138979	0.0156057	0.013839	0.0262058	P27144	Adenylate kinase 4 mitochondrial OS=Homo sapiens OX=9606 GN=AK4 PE=1 SV=1	MITOCHONDRIA	MITOCHONDRIA	1	MITOCHONDRIA
Q9BYD3	0.293984	0.432443	0.143186	0.0413444	0.0115715	0.0120012	0.0162983	0.0133824	0.0196746	0.0161142	0.448171	0.280187	0.163535	0.0276266	0.00930641	0.00913082	0.0111794	0.0124671	0.0185543	0.019842	0.336103	0.412026	0.12671	0.0261161	0.0144516	0.00882581	0.00980645	0.0154323	0.0274581	0.023071	Q9BYD3	39S ribosomal protein L4 mitochondrial OS=Homo sapiens OX=9606 GN=MRPL4 PE=1 SV=1	unknown	MITOCHONDRIA	0.95896	MITOCHONDRIA
A0A1W2PQV2	0.383257	0.399548	0.11817	0.0521731	0.0112967	0.00558892	0.00651049	0.00591593	0.00448897	0.0130507	0.444178	0.28023	0.144957	0.0376984	0.0166251	0.0113884	0.014543	0.00940093	0.0112622	0.029717	0.360647	0.351613	0.153898	0.0349173	0.0178878	0.00826633	0.00948595	0.0145	0.0100732	0.0387117	A0A1W2PQV2	Glycine cleavage system H protein mitochondrial (Fragment) OS=Homo sapiens OX=9606 GN=GCSH PE=1 SV=1	unknown	MITOCHONDRIA	0.95997	MITOCHONDRIA
P82650	0.323344	0.428527	0.135831	0.0467375	0.010371	0.00854883	0.0076765	0.0113209	0.0141899	0.0134533	0.445413	0.276164	0.148391	0.0328135	0.0134708	0.0124611	0.00999017	0.016048	0.0212557	0.0239923	0.304802	0.393736	0.142503	0.0408201	0.0196133	0.0101437	0.0141583	0.0197971	0.0301247	0.024302	P82650	28S ribosomal protein S22 mitochondrial OS=Homo sapiens OX=9606 GN=MRPS22 PE=1 SV=1	unknown	MITOCHONDRIA	0.963323	MITOCHONDRIA
Q4G0N4	0.332613	0.416414	0.122592	0.0431817	0.0103463	0.0101134	0.014405	0.018497	0.00921521	0.0226222	0.431887	0.290054	0.152971	0.0297531	0.0123841	0.0128515	0.0112158	0.0120726	0.0108264	0.0359841	0.295579	0.365924	0.151985	0.0346886	0.0214585	0.012746	0.0193611	0.0164569	0.0225879	0.0592126	Q4G0N4	NAD kinase 2 mitochondrial OS=Homo sapiens OX=9606 GN=NADK2 PE=1 SV=2	unknown	MITOCHONDRIA	0.965425	MITOCHONDRIA
P11498	0.324267	0.411081	0.136871	0.043641	0.0156386	0.0127648	0.0106262	0.012297	0.011495	0.0213193	0.400931	0.250696	0.141779	0.0446906	0.0200171	0.0152537	0.0143973	0.0241383	0.028206	0.0598908	0.37402	0.338894	0.151243	0.0313703	0.0149247	0.0113123	0.0144494	0.0129759	0.016921	0.0338894	P11498	Pyruvate carboxylase mitochondrial OS=Homo sapiens OX=9606 GN=PC PE=1 SV=2	MITOCHONDRIA	MITOCHONDRIA	1	MITOCHONDRIA
Q13405	0.35362	0.392111	0.128622	0.0446784	0.014397	0.0121958	0.011125	0.0198108	0.018264	0.0051758	0.47322	0.286301	0.137438	0.0283136	0.0104599	0.00722057	0.00778932	0.0134273	0.0180762	0.0177547	0.358982	0.324491	0.152705	0.0327852	0.0154101	0.0128245	0.0149964	0.0156169	0.0279243	0.0442652	Q13405	39S ribosomal protein L49 mitochondrial OS=Homo sapiens OX=9606 GN=MRPL49 PE=1 SV=1	unknown	MITOCHONDRIA	0.961459	MITOCHONDRIA
G3V0I5	0.36774	0.438505	0.131006	0.0301451	0.00536022	0.00722892	0.00521269	0.00545857	0.00526186	0.00408163	0.47299	0.277646	0.147781	0.0278586	0.00951861	0.01158	0.00936704	0.00769977	0.00848794	0.0270704	0.32733	0.385013	0.144437	0.0364771	0.0175537	0.0153721	0.0121759	0.0149155	0.0166405	0.0300847	G3V0I5	NADH dehydrogenase [ubiquinone] flavoprotein 1 mitochondrial OS=Homo sapiens OX=9606 GN=NDUFV1 PE=1 SV=1	unknown	MITOCHONDRIA	0.958604	MITOCHONDRIA
P36957	0.337591	0.449356	0.136081	0.0244043	0.00599378	0.0054906	0.00913127	0.0108924	0.0129791	0.00808051	0.485007	0.305134	0.141525	0.0219	0.00563535	0.00501684	0.00316129	0.00666621	0.00985041	0.0161043	0.37176	0.401306	0.146136	0.0234842	0.00927519	0.00489967	0.00517314	0.00846618	0.0160892	0.0134114	P36957	Dihydrolipoyllysine-residue succinyltransferase component of 2-oxoglutarate dehydrogenase complex mitochondrial OS=Homo sapiens OX=9606 GN=DLST PE=1 SV=4	MITOCHONDRIA	MITOCHONDRIA	1	MITOCHONDRIA
O75390	0.34735	0.420996	0.120667	0.0305846	0.0101115	0.0106119	0.013899	0.0146497	0.0135578	0.0175728	0.473985	0.27596	0.155882	0.0293898	0.00851256	0.00820816	0.00800873	0.0107483	0.00942574	0.0198801	0.364718	0.379236	0.152574	0.0267958	0.0115937	0.00907251	0.0108533	0.0148272	0.0124747	0.0178545	O75390	Citrate synthase mitochondrial OS=Homo sapiens OX=9606 GN=CS PE=1 SV=2	MITOCHONDRIA	MITOCHONDRIA	1	MITOCHONDRIA
P11182	0.326618	0.474242	0.107652	0.0261167	0.00740505	0.00684768	0.0117844	0.0149693	0.0125806	0.0117844	0.457903	0.277118	0.170895	0.0382763	0.00931218	0.00552309	0.00725708	0.00597264	0.0118168	0.015927	0.343818	0.338358	0.164402	0.0380297	0.0166884	0.0107327	0.0136485	0.0236987	0.0232024	0.0274211	P11182	Lipoamide acyltransferase component of branched-chain alpha-keto acid dehydrogenase complex mitochondrial OS=Homo sapiens OX=9606 GN=DBT PE=1 SV=3	MITOCHONDRIA	MITOCHONDRIA	1	MITOCHONDRIA
P54819	0.274408	0.346044	0.110442	0.0514022	0.0260235	0.0271126	0.0367425	0.0326154	0.0272416	0.0679678	0.428684	0.276605	0.135341	0.0301664	0.0221057	0.0174292	0.0158293	0.0165216	0.0183829	0.0389349	0.339216	0.362035	0.138286	0.0232924	0.0173737	0.0168691	0.017022	0.0182608	0.0180314	0.0496131	P54819	Adenylate kinase 2 mitochondrial OS=Homo sapiens OX=9606 GN=AK2 PE=1 SV=2	MITOCHONDRIA	MITOCHONDRIA	1	MITOCHONDRIA
O95831	0.330844	0.440273	0.124454	0.0325397	0.0103926	0.0100689	0.0146121	0.014534	0.0108056	0.0114754	0.459341	0.282898	0.152791	0.0331895	0.0132355	0.00838283	0.00754791	0.00770481	0.00808585	0.0268239	0.343632	0.388648	0.150191	0.034852	0.0152824	0.00927663	0.00964621	0.0121132	0.0142476	0.0221105	O95831	Apoptosis-inducing factor 1 mitochondrial OS=Homo sapiens OX=9606 GN=AIFM1 PE=1 SV=1	unknown	MITOCHONDRIA	0.963261	MITOCHONDRIA
P18859	0.3576	0.423183	0.110829	0.0577529	0.0160651	0.00437214	0.00884596	0.00284698	0.00203355	0.0164718	0.432876	0.323048	0.132014	0.0281906	0.0134895	0.0105547	0.0111739	0.00896607	0.0107431	0.0289445	0.3656	0.402025	0.157035	0.0271526	0.0100548	0.00697195	0.00583367	0.00628424	0.00920107	0.00984135	P18859	ATP synthase-coupling factor 6 mitochondrial OS=Homo sapiens OX=9606 GN=ATP5J PE=1 SV=1	MITOCHONDRIA	MITOCHONDRIA	1	MITOCHONDRIA
Q02252	0.347573	0.448544	0.128155	0.0189606	0.00593946	0.00856653	0.0110794	0.00822387	0.0131354	0.00982296	0.413343	0.2471	0.138385	0.0450213	0.0206995	0.0141446	0.0188883	0.0314804	0.0301867	0.0407521	0.311986	0.35149	0.145683	0.0363566	0.0220324	0.0210689	0.0191418	0.0253726	0.0246017	0.0422662	Q02252	Methylmalonate-semialdehyde dehydrogenase [acylating] mitochondrial OS=Homo sapiens OX=9606 GN=ALDH6A1 PE=1 SV=2	unknown	MITOCHONDRIA	0.958217	MITOCHONDRIA
P42126	0.358639	0.433307	0.130941	0.0345597	0.00720811	0.00670854	0.00628033	0.00492435	0.00413931	0.0132922	0.457454	0.291991	0.145914	0.0298214	0.00950861	0.00962428	0.0106654	0.0102952	0.00687118	0.0278549	0.367289	0.399443	0.143893	0.0240026	0.0122676	0.00692226	0.00798722	0.00763906	0.00704514	0.0235111	P42126	Enoyl-CoA delta isomerase 1 mitochondrial OS=Homo sapiens OX=9606 GN=ECI1 PE=1 SV=1	MITOCHONDRIA	MITOCHONDRIA	1	MITOCHONDRIA
P34897	0.356253	0.398035	0.126964	0.0393507	0.0107611	0.00869538	0.0127598	0.0116368	0.0111216	0.0244223	0.446771	0.262111	0.159629	0.0324459	0.0132772	0.0108818	0.0113153	0.0114465	0.0130491	0.0390731	0.345363	0.365464	0.152495	0.0265102	0.0141564	0.0106656	0.013062	0.0159734	0.0151937	0.0411174	P34897	Serine hydroxymethyltransferase mitochondrial OS=Homo sapiens OX=9606 GN=SHMT2 PE=1 SV=3	MITOCHONDRIA	MITOCHONDRIA	1	MITOCHONDRIA
P32322	0.343631	0.374587	0.109592	0.0463084	0.0156026	0.0123572	0.0222181	0.0245272	0.0229046	0.0282719	0.505057	0.258986	0.121674	0.0346359	0.0166461	0.0117568	0.0158997	0.0124286	0.0119434	0.010973	0.381896	0.358232	0.124305	0.0450463	0.0232359	0.00755524	0.00555952	0.0182466	0.0212402	0.0146828	P32322	Pyrroline-5-carboxylate reductase 1 mitochondrial OS=Homo sapiens OX=9606 GN=PYCR1 PE=1 SV=2	MITOCHONDRIA	MITOCHONDRIA	1	MITOCHONDRIA
M0QWZ7	0.346059	0.437092	0.139388	0.0327525	0.00777842	0.00625505	0.0078015	0.00775534	0.00634737	0.00877092	0.477291	0.28335	0.149658	0.0289002	0.00515659	0.00839039	0.00978878	0.00836125	0.00722505	0.0218791	0.357066	0.36906	0.155535	0.033559	0.0158534	0.0100765	0.0103632	0.0126783	0.0130973	0.0227107	M0QWZ7	Serine--tRNA ligase mitochondrial OS=Homo sapiens OX=9606 GN=SARS2 PE=1 SV=1	unknown	MITOCHONDRIA	0.959065	MITOCHONDRIA
Q8TCS8	0.304041	0.432338	0.138871	0.0392823	0.0114779	0.00951924	0.0156965	0.0211889	0.0181893	0.00939597	0.462452	0.278941	0.140155	0.0312038	0.0126281	0.00966036	0.0116388	0.0170736	0.0160477	0.0202	0.353901	0.368676	0.14663	0.0278577	0.0177612	0.0125283	0.0184846	0.0220245	0.0183615	0.013775	Q8TCS8	Polyribonucleotide nucleotidyltransferase 1 mitochondrial OS=Homo sapiens OX=9606 GN=PNPT1 PE=1 SV=2	unknown	MITOCHONDRIA	0.964888	MITOCHONDRIA
P49411	0.337575	0.425427	0.129915	0.0364349	0.010671	0.0093081	0.012256	0.0120188	0.0103378	0.016057	0.472201	0.276794	0.148195	0.034317	0.00922486	0.008417	0.00900736	0.00952522	0.00979451	0.0225236	0.369662	0.406928	0.144524	0.0193696	0.0084893	0.00626164	0.00636943	0.00765638	0.00718602	0.0235538	P49411	Elongation factor Tu mitochondrial OS=Homo sapiens OX=9606 GN=TUFM PE=1 SV=2	MITOCHONDRIA	MITOCHONDRIA	1	MITOCHONDRIA
P00367	0.313779	0.437978	0.142933	0.0324876	0.00734068	0.00799526	0.0186868	0.0198713	0.0127877	0.00614061	0.446583	0.288012	0.146814	0.0311493	0.0106171	0.00931437	0.0133553	0.0151027	0.0142836	0.0247681	0.324535	0.392221	0.137904	0.027377	0.015638	0.0133119	0.0178496	0.0277567	0.0236107	0.0197961	P00367	Glutamate dehydrogenase 1 mitochondrial OS=Homo sapiens OX=9606 GN=GLUD1 PE=1 SV=2	MITOCHONDRIA	MITOCHONDRIA	1	MITOCHONDRIA
E9PF16	0.28591	0.373849	0.13131	0.0765419	0.02565	0.0246881	0.0317127	0.0153317	0.012242	0.0227644	0.45707	0.267337	0.159631	0.0369077	0.0118867	0.00998117	0.0100946	0.00737246	0.0103441	0.0293764	0.314064	0.402193	0.144997	0.0311251	0.0193806	0.0111416	0.0127269	0.0152053	0.0169692	0.0321968	E9PF16	Acyl-CoA synthetase family member 2 mitochondrial OS=Homo sapiens OX=9606 GN=ACSF2 PE=1 SV=1	unknown	MITOCHONDRIA	0.955549	MITOCHONDRIA
P51398	0.339429	0.399068	0.121688	0.0375727	0.0153211	0.0106854	0.0155761	0.0260993	0.019586	0.0149735	0.483261	0.282326	0.147425	0.0311969	0.00784777	0.00686073	0.00574424	0.00951441	0.0121681	0.0136567	0.339394	0.414815	0.135086	0.0244792	0.0142437	0.00922305	0.00999972	0.0151313	0.0204155	0.0172117	P51398	28S ribosomal protein S29 mitochondrial OS=Homo sapiens OX=9606 GN=DAP3 PE=1 SV=1	unknown	MITOCHONDRIA	0.958068	MITOCHONDRIA
P42765	0.325048	0.433799	0.123672	0.0346809	0.0110475	0.0096758	0.0106211	0.0169234	0.010547	0.0239856	0.44271	0.285892	0.155115	0.0321264	0.0118323	0.00810701	0.0101471	0.0122049	0.0126661	0.0291994	0.342335	0.405553	0.144518	0.021832	0.0100617	0.00647841	0.008187	0.0155197	0.028429	0.0170859	P42765	3-ketoacyl-CoA thiolase mitochondrial OS=Homo sapiens OX=9606 GN=ACAA2 PE=1 SV=2	MITOCHONDRIA	MITOCHONDRIA	1	MITOCHONDRIA
P45954	0.336303	0.43905	0.105716	0.0347439	0.0166295	0.0139569	0.0126206	0.0129176	0.0103935	0.0176689	0.413133	0.256191	0.140713	0.0333021	0.0130394	0.0244841	0.0247655	0.0252345	0.0181989	0.0509381	0.31216	0.333498	0.144424	0.0483058	0.0329942	0.0236096	0.0215351	0.0229181	0.0233132	0.0372419	P45954	Short/branched chain specific acyl-CoA dehydrogenase mitochondrial OS=Homo sapiens OX=9606 GN=ACADSB PE=1 SV=1	MITOCHONDRIA	MITOCHONDRIA	1	MITOCHONDRIA
Q96DV4	0.296808	0.42326	0.132553	0.0348635	0.0126453	0.0131796	0.0206153	0.0273832	0.0268044	0.0118883	0.469736	0.285359	0.155317	0.0328834	0.00718847	0.00745612	0.00627079	0.0109356	0.0128857	0.011968	0.325248	0.394286	0.137048	0.0332325	0.0168254	0.0107129	0.00891134	0.0193669	0.0303372	0.0240317	Q96DV4	39S ribosomal protein L38 mitochondrial OS=Homo sapiens OX=9606 GN=MRPL38 PE=1 SV=2	unknown	MITOCHONDRIA	0.96101	MITOCHONDRIA
Q6PI48	0.348675	0.398695	0.122382	0.0313652	0.0121309	0.0113824	0.0151389	0.0245725	0.0208019	0.0148564	0.466254	0.274598	0.146746	0.0300184	0.0103719	0.00725176	0.00814478	0.0135567	0.0174731	0.0255856	0.357046	0.384783	0.136493	0.021316	0.0124084	0.0113271	0.011665	0.0155308	0.0160174	0.0334135	Q6PI48	Aspartate--tRNA ligase mitochondrial OS=Homo sapiens OX=9606 GN=DARS2 PE=1 SV=1	unknown	MITOCHONDRIA	0.963034	MITOCHONDRIA
P10606	0.338917	0.380606	0.167365	0.0614912	0.0138681	0.00816515	0.0106273	0.00521897	0.00420884	0.00953303	0.46181	0.303596	0.14917	0.0310121	0.0100957	0.010857	0.00893569	0.00589067	0.00752193	0.0111107	0.379407	0.379241	0.134061	0.019661	0.0122911	0.0126952	0.0145734	0.0188051	0.0147398	0.0145258	P10606	Cytochrome c oxidase subunit 5B mitochondrial OS=Homo sapiens OX=9606 GN=COX5B PE=1 SV=2	MITOCHONDRIA	MITOCHONDRIA	1	MITOCHONDRIA
Q9BYD6	0.311438	0.437366	0.133572	0.0444047	0.0136651	0.00849601	0.0104482	0.0153973	0.0152048	0.0100082	0.456324	0.281653	0.147107	0.0328654	0.0147782	0.00857776	0.00726058	0.00899541	0.015999	0.0264401	0.331519	0.393128	0.143286	0.0319153	0.0156614	0.00710874	0.00992262	0.0167352	0.0279166	0.0228072	Q9BYD6	39S ribosomal protein L1 mitochondrial OS=Homo sapiens OX=9606 GN=MRPL1 PE=1 SV=2	unknown	MITOCHONDRIA	0.962671	MITOCHONDRIA
P47985	0.4007	0.409846	0.0709457	0.0475622	0.0132029	0.00819216	0.0180546	0.0134415	0.00596516	0.0120894	0.487232	0.287116	0.156085	0.025343	0.00933182	0.00827084	0.00716163	0.00424393	0.00286948	0.012346	0.414625	0.351143	0.15125	0.0227619	0.0105744	0.00836993	0.00817278	0.00933775	0.0081907	0.0155749	P47985	Cytochrome b-c1 complex subunit Rieske mitochondrial OS=Homo sapiens OX=9606 GN=UQCRFS1 PE=1 SV=2	MITOCHONDRIA	MITOCHONDRIA	1	MITOCHONDRIA
Q16595	0.335419	0.380006	0.130163	0.053035	0.0112641	0.015801	0.0219024	0.0161139	0.0125156	0.0237797	0.417089	0.267761	0.126881	0.0367688	0.0220452	0.0156087	0.0133559	0.0172983	0.0220452	0.0611473	0.305792	0.154174	0.140119	0.0600511	0.0494037	0.04046	0.0519591	0.0583475	0.0770869	0.0626065	Q16595	Frataxin mitochondrial OS=Homo sapiens OX=9606 GN=FXN PE=1 SV=2	MITOCHONDRIA	MITOCHONDRIA	1	MITOCHONDRIA
Q9NSE4	0.355859	0.408816	0.122697	0.0364315	0.00897045	0.00995287	0.0136019	0.0144439	0.00991778	0.0193093	0.460709	0.272891	0.164661	0.02992	0.0094648	0.00741773	0.00635138	0.00723092	0.00968274	0.0316713	0.360048	0.383961	0.149609	0.0252132	0.0123412	0.00914405	0.0085416	0.0107724	0.0116791	0.0286907	Q9NSE4	Isoleucine--tRNA ligase mitochondrial OS=Homo sapiens OX=9606 GN=IARS2 PE=1 SV=2	unknown	MITOCHONDRIA	0.960919	MITOCHONDRIA
O43674	0.377676	0.350699	0.0630888	0.0628033	0.0241222	0.0165572	0.0224094	0.030688	0.0311162	0.0208393	0.482531	0.312415	0.138036	0.0265876	0.00610855	0.00544935	0.00333993	0.00500989	0.00628433	0.0142386	0.331227	0.362347	0.155061	0.0421428	0.0198951	0.011964	0.0131066	0.020164	0.0146525	0.0294394	O43674	NADH dehydrogenase [ubiquinone] 1 beta subcomplex subunit 5 mitochondrial OS=Homo sapiens OX=9606 GN=NDUFB5 PE=1 SV=1	MITOCHONDRIA	MITOCHONDRIA	1	MITOCHONDRIA
A2A274	0.290932	0.440847	0.156808	0.0385575	0.00994197	0.0105056	0.0119932	0.0138227	0.0104871	0.0161049	0.451591	0.285577	0.152765	0.0333248	0.0113462	0.0102145	0.00925109	0.00880421	0.00943681	0.0276894	0.330874	0.394687	0.147834	0.0284254	0.0145184	0.0102225	0.013711	0.0145419	0.0136953	0.0314906	A2A274	Aconitate hydratase mitochondrial OS=Homo sapiens OX=9606 GN=ACO2 PE=1 SV=1	unknown	MITOCHONDRIA	0.960098	MITOCHONDRIA
P40926	0.310171	0.420828	0.126011	0.036131	0.0114647	0.0119602	0.0213419	0.0265575	0.0237179	0.0118164	0.458619	0.29372	0.149888	0.0291151	0.0101378	0.0066601	0.00879734	0.0105502	0.0118391	0.020674	0.375945	0.404257	0.145364	0.0225555	0.00908168	0.00579635	0.0063563	0.00773868	0.0075287	0.0153767	P40926	Malate dehydrogenase mitochondrial OS=Homo sapiens OX=9606 GN=MDH2 PE=1 SV=3	MITOCHONDRIA	MITOCHONDRIA	1	MITOCHONDRIA
O95299	0.293998	0.447929	0.166013	0.0425903	0.00791218	0.0074845	0.00798346	0.00883883	0.00737758	0.00987241	0.480738	0.26645	0.158275	0.0347018	0.0086617	0.00580196	0.00709434	0.00808425	0.00852421	0.021668	0.336987	0.437107	0.14196	0.0285612	0.0147485	0.00450029	0.0063717	0.00766386	0.0069955	0.0151049	O95299	NADH dehydrogenase [ubiquinone] 1 alpha subcomplex subunit 10 mitochondrial OS=Homo sapiens OX=9606 GN=NDUFA10 PE=1 SV=1	MITOCHONDRIA	MITOCHONDRIA	1	MITOCHONDRIA
Q12931	0.357207	0.408036	0.13042	0.0322616	0.0105802	0.0102882	0.0123035	0.0129275	0.0117081	0.0142672	0.471405	0.278106	0.153541	0.0349963	0.00922802	0.0070915	0.00685498	0.00707967	0.00832926	0.0233677	0.371395	0.386169	0.152088	0.0291318	0.0107383	0.00715011	0.00683443	0.00950717	0.00913362	0.0178516	Q12931	Heat shock protein 75 kDa mitochondrial OS=Homo sapiens OX=9606 GN=TRAP1 PE=1 SV=3	MITOCHONDRIA	MITOCHONDRIA	1	MITOCHONDRIA
P61604	0.417389	0.406551	0.115863	0.0235778	0.00391585	0.00433519	0.00578813	0.00487266	0.00442969	0.0132773	0.479997	0.306545	0.13724	0.0248641	0.00577767	0.00628908	0.00798768	0.00549153	0.00616732	0.0196404	0.378544	0.393434	0.148446	0.0209426	0.0088146	0.00651006	0.00708354	0.00793314	0.0081774	0.0201143	P61604	10 kDa heat shock protein mitochondrial OS=Homo sapiens OX=9606 GN=HSPE1 PE=1 SV=2	MITOCHONDRIA	MITOCHONDRIA	1	MITOCHONDRIA
O75947	0.376586	0.414547	0.134826	0.0291763	0.00908319	0.00575728	0.00828039	0.00892263	0.00348648	0.0093355	0.459936	0.275816	0.163112	0.0430962	0.0130125	0.00854324	0.00878646	0.0060958	0.00644543	0.0151559	0.35575	0.419696	0.165434	0.0251214	0.0105707	0.00382466	0.00486903	0.00525008	0.00385288	0.00563114	O75947	ATP synthase subunit d mitochondrial OS=Homo sapiens OX=9606 GN=ATP5H PE=1 SV=3	MITOCHONDRIA	MITOCHONDRIA	1	MITOCHONDRIA
O43837	0.317844	0.430872	0.143971	0.0413297	0.00966757	0.00718778	0.0116083	0.0116801	0.0108895	0.0149506	0.46103	0.304589	0.151342	0.0219645	0.0103659	0.00728414	0.00762033	0.0102538	0.00930128	0.0162492	0.332017	0.416023	0.159791	0.0279038	0.0114031	0.00798515	0.0067476	0.00892805	0.0101656	0.0190347	O43837	Isocitrate dehydrogenase [NAD] subunit beta mitochondrial OS=Homo sapiens OX=9606 GN=IDH3B PE=1 SV=2	MITOCHONDRIA	MITOCHONDRIA	1	MITOCHONDRIA
G5EA06	0.317385	0.417018	0.119892	0.0412966	0.014651	0.01288	0.0149999	0.0180857	0.0220034	0.0217887	0.454887	0.27211	0.146085	0.0364984	0.0125447	0.0086505	0.0104252	0.0127881	0.0184571	0.0275538	0.305761	0.406535	0.135452	0.0280059	0.0172793	0.01324	0.0155888	0.0244005	0.024954	0.0287839	G5EA06	28S ribosomal protein S27 mitochondrial OS=Homo sapiens OX=9606 GN=MRPS27 PE=1 SV=1	unknown	MITOCHONDRIA	0.963837	MITOCHONDRIA
P46199	0.252149	0.410983	0.151691	0.0385088	0.0116084	0.0272352	0.0306954	0.0235517	0.0239982	0.0295792	0.401664	0.2426	0.137631	0.0451441	0.0306195	0.0198634	0.0211981	0.0223758	0.0248881	0.0540159	0.3367	0.362205	0.142931	0.0270455	0.0174598	0.0195139	0.0232797	0.0198562	0.0261897	0.0248203	P46199	Translation initiation factor IF-2 mitochondrial OS=Homo sapiens OX=9606 GN=MTIF2 PE=1 SV=2	MITOCHONDRIA	MITOCHONDRIA	1	MITOCHONDRIA
P30048	0.325918	0.423267	0.13781	0.0432579	0.0104629	0.00944286	0.00909512	0.0104165	0.00820648	0.0221235	0.446768	0.296321	0.159146	0.0329648	0.0104358	0.00729277	0.0078207	0.00676484	0.00865556	0.0238304	0.3638	0.407357	0.152851	0.0246197	0.00809721	0.00639809	0.00631606	0.00696056	0.00641566	0.0171846	P30048	Thioredoxin-dependent peroxide reductase mitochondrial OS=Homo sapiens OX=9606 GN=PRDX3 PE=1 SV=3	MITOCHONDRIA	MITOCHONDRIA	1	MITOCHONDRIA
E9PDF2	0.337808	0.398977	0.122634	0.0494419	0.0138172	0.0134484	0.0132763	0.0180705	0.0182672	0.0142597	0.445159	0.275459	0.163751	0.036735	0.0106069	0.00872003	0.00925304	0.0106815	0.014242	0.0253926	0.340485	0.375717	0.152423	0.0246246	0.0123354	0.0106445	0.0118734	0.0148949	0.0238669	0.0331347	E9PDF2	2-oxoglutarate dehydrogenase mitochondrial OS=Homo sapiens OX=9606 GN=OGDH PE=1 SV=1	unknown	MITOCHONDRIA	0.965559	MITOCHONDRIA
O75616	0.294721	0.436038	0.133142	0.0466997	0.00852248	0.00991391	0.0141751	0.0202626	0.021828	0.0146969	0.465567	0.265645	0.148229	0.0309255	0.0094292	0.0121233	0.0121233	0.013807	0.0203738	0.021777	0.297893	0.36928	0.139168	0.0420859	0.0211379	0.0133536	0.0168977	0.026897	0.0362002	0.0370863	O75616	GTPase Era mitochondrial OS=Homo sapiens OX=9606 GN=ERAL1 PE=1 SV=2	unknown	MITOCHONDRIA	0.962564	MITOCHONDRIA
P22830	0.304304	0.432696	0.127077	0.0350269	0.0111775	0.01578	0.0255828	0.0233712	0.0178123	0.00717274	0.445121	0.262828	0.166348	0.0397171	0.0203514	0.0133936	0.0159448	0.0132197	0.0131617	0.00991477	0.274162	0.377383	0.148258	0.0519395	0.0233399	0.0226824	0.0210388	0.0246548	0.0230112	0.0335306	P22830	Ferrochelatase mitochondrial OS=Homo sapiens OX=9606 GN=FECH PE=1 SV=2	MITOCHONDRIA	MITOCHONDRIA	1	MITOCHONDRIA
Q9BYD2	0.323748	0.46026	0.103426	0.0356513	0.0106366	0.0111176	0.01069	0.0163023	0.01828	0.00988829	0.472096	0.263691	0.147791	0.0276085	0.0130557	0.00964384	0.00835567	0.0134387	0.0218988	0.0224211	0.369629	0.378769	0.132152	0.0142043	0.0103268	0.0127008	0.0117512	0.0195062	0.0324444	0.0185171	Q9BYD2	39S ribosomal protein L9 mitochondrial OS=Homo sapiens OX=9606 GN=MRPL9 PE=1 SV=2	unknown	MITOCHONDRIA	0.954962	MITOCHONDRIA
Q9NX20	0.312898	0.424473	0.132418	0.0581167	0.0183914	0.00735655	0.0053948	0.0144679	0.0196175	0.00686611	0.432706	0.232958	0.148485	0.0401029	0.0233614	0.0174527	0.0147719	0.0282307	0.0410876	0.0208447	0.319859	0.36595	0.126724	0.0488718	0.0236338	0.0180729	0.0155064	0.0176452	0.0317613	0.0319752	Q9NX20	39S ribosomal protein L16 mitochondrial OS=Homo sapiens OX=9606 GN=MRPL16 PE=1 SV=1	unknown	MITOCHONDRIA	0.95598	MITOCHONDRIA
O75306	0.368863	0.433359	0.12872	0.0324034	0.0090861	0.00527286	0.00786367	0.00496269	0.00457954	0.00488971	0.480994	0.273268	0.168104	0.0300169	0.00714244	0.0051701	0.00581199	0.00472661	0.00463325	0.0201319	0.373851	0.397917	0.154874	0.0228869	0.0098709	0.00695957	0.00753334	0.00826648	0.00717208	0.0106678	O75306	NADH dehydrogenase [ubiquinone] iron-sulfur protein 2 mitochondrial OS=Homo sapiens OX=9606 GN=NDUFS2 PE=1 SV=2	MITOCHONDRIA	MITOCHONDRIA	1	MITOCHONDRIA
Q96D53	0.331624	0.377226	0.132893	0.0507285	0.012952	0.0174042	0.0165947	0.0195629	0.0186185	0.0223961	0.395343	0.238132	0.152708	0.0521034	0.0191689	0.0167246	0.0259874	0.0227711	0.0232857	0.0537759	0.356454	0.349104	0.145613	0.0459348	0.0146991	0.0142398	0.0133211	0.0174552	0.0248048	0.0183739	Q96D53	Atypical kinase COQ8B mitochondrial OS=Homo sapiens OX=9606 GN=COQ8B PE=1 SV=2	unknown	MITOCHONDRIA	0.960431	MITOCHONDRIA
Q9HCC0	0.340598	0.419312	0.120377	0.0296598	0.0150668	0.0107079	0.014593	0.0192362	0.0148141	0.0156354	0.455927	0.269062	0.150043	0.0339774	0.0117455	0.0104863	0.00994355	0.0145245	0.0173035	0.0269865	0.34258	0.389404	0.140348	0.0267974	0.0135013	0.0135424	0.00980794	0.0152249	0.0228989	0.0258946	Q9HCC0	Methylcrotonoyl-CoA carboxylase beta chain mitochondrial OS=Homo sapiens OX=9606 GN=MCCC2 PE=1 SV=1	unknown	MITOCHONDRIA	0.965002	MITOCHONDRIA
A0A087WVM4	0.33918	0.399602	0.125777	0.0366744	0.013634	0.0112824	0.0181958	0.025302	0.0175405	0.0128116	0.425702	0.243262	0.144868	0.0448499	0.021514	0.0159727	0.01804	0.0255733	0.0311052	0.0291133	0.333833	0.355655	0.146926	0.0295778	0.0198862	0.0174579	0.0211442	0.0254758	0.0224896	0.0275541	A0A087WVM4	Monofunctional C1-tetrahydrofolate synthase mitochondrial OS=Homo sapiens OX=9606 GN=MTHFD1L PE=1 SV=1	unknown	MITOCHONDRIA	0.965283	MITOCHONDRIA
O75489	0.373226	0.435391	0.121393	0.0288077	0.0103479	0.00561593	0.00759191	0.00756591	0.00363996	0.00642192	0.463043	0.278645	0.155011	0.0403939	0.0122997	0.00893995	0.0081676	0.00789728	0.00965437	0.015949	0.35556	0.42407	0.141943	0.026235	0.0112858	0.00790009	0.00577243	0.00651249	0.00773358	0.012988	O75489	NADH dehydrogenase [ubiquinone] iron-sulfur protein 3 mitochondrial OS=Homo sapiens OX=9606 GN=NDUFS3 PE=1 SV=1	MITOCHONDRIA	MITOCHONDRIA	1	MITOCHONDRIA
P53007	0.299737	0.420684	0.127958	0.0315513	0.0118317	0.0214724	0.0214724	0.0197195	0.0184049	0.0271691	0.460757	0.281286	0.179586	0.0380982	0.0103904	0.00652622	0.00495191	0.00561026	0.00555301	0.00724181	0.37275	0.398338	0.169642	0.0218199	0.0104434	0.00572413	0.00662133	0.00532936	0.00457571	0.00475515	P53007	Tricarboxylate transport protein mitochondrial OS=Homo sapiens OX=9606 GN=SLC25A1 PE=1 SV=2	MITOCHONDRIA	MITOCHONDRIA	1	MITOCHONDRIA
P31040	0.322623	0.432511	0.1579	0.0401472	0.00810002	0.00714214	0.00813363	0.0056801	0.00636911	0.0113938	0.460766	0.29195	0.160076	0.0319458	0.00851739	0.00750022	0.00790262	0.00701958	0.00782438	0.0164983	0.367041	0.402662	0.153913	0.0223887	0.00885279	0.00693132	0.00673684	0.00896948	0.00847939	0.014026	P31040	Succinate dehydrogenase [ubiquinone] flavoprotein subunit mitochondrial OS=Homo sapiens OX=9606 GN=SDHA PE=1 SV=2	MITOCHONDRIA	MITOCHONDRIA	1	MITOCHONDRIA
P40939	0.30591	0.436156	0.148465	0.0314956	0.0109382	0.00937275	0.0127035	0.0162408	0.0137294	0.0149884	0.462697	0.282943	0.162269	0.0302354	0.00782663	0.0074508	0.00865815	0.00931585	0.0103118	0.0182935	0.361863	0.386687	0.152721	0.0248879	0.0115564	0.00898117	0.010347	0.0140029	0.0149226	0.0140305	P40939	Trifunctional enzyme subunit alpha mitochondrial OS=Homo sapiens OX=9606 GN=HADHA PE=1 SV=2	MITOCHONDRIA	MITOCHONDRIA	1	MITOCHONDRIA
Q9Y2R9	0.319473	0.448002	0.118965	0.0409165	0.00873217	0.00823319	0.0111439	0.0167575	0.0216641	0.00611252	0.472255	0.280706	0.143363	0.0273202	0.00909469	0.00777478	0.00726852	0.012295	0.0178278	0.0220949	0.330486	0.379139	0.149965	0.0306006	0.0154984	0.00893801	0.0141335	0.0182723	0.026858	0.0261095	Q9Y2R9	28S ribosomal protein S7 mitochondrial OS=Homo sapiens OX=9606 GN=MRPS7 PE=1 SV=2	unknown	MITOCHONDRIA	0.961308	MITOCHONDRIA
K7EKE6	0.344124	0.425092	0.114511	0.039727	0.0112553	0.0105967	0.0141546	0.015027	0.011777	0.0137355	0.449649	0.251915	0.15979	0.0365402	0.0143333	0.0107063	0.0112558	0.014733	0.0177405	0.0333378	0.367232	0.372866	0.158062	0.0266245	0.0124407	0.00949688	0.0100466	0.0110158	0.0112762	0.0209394	K7EKE6	Lon protease homolog mitochondrial OS=Homo sapiens OX=9606 GN=LONP1 PE=1 SV=1	unknown	MITOCHONDRIA	0.962164	MITOCHONDRIA
P22695	0.343351	0.438765	0.138564	0.0399906	0.010147	0.00506897	0.00741337	0.0060013	0.00511423	0.00558492	0.472248	0.288654	0.157302	0.03609	0.0102964	0.00526612	0.00541022	0.00527922	0.0067202	0.012733	0.365942	0.38947	0.159065	0.0271048	0.0127667	0.00728125	0.00746363	0.00733736	0.0101713	0.0133981	P22695	Cytochrome b-c1 complex subunit 2 mitochondrial OS=Homo sapiens OX=9606 GN=UQCRC2 PE=1 SV=3	MITOCHONDRIA	MITOCHONDRIA	1	MITOCHONDRIA
Q9NRK6	0.304036	0.402274	0.14833	0.0534726	0.0103462	0.0160828	0.0133169	0.0164925	0.0203852	0.0152633	0.443159	0.280156	0.148539	0.0429563	0.00969048	0.0130171	0.0167776	0.00983512	0.0063639	0.0295054	0.317169	0.339453	0.150245	0.0510161	0.0377015	0.0270498	0.0144359	0.0137351	0.0155571	0.033637	Q9NRK6	ATP-binding cassette sub-family B member 10 mitochondrial OS=Homo sapiens OX=9606 GN=ABCB10 PE=1 SV=2	unknown	MITOCHONDRIA	0.957251	MITOCHONDRIA
Q9Y2Q9	0.348601	0.433333	0.112977	0.0295165	0.0108142	0.00928753	0.0109415	0.0143766	0.0138677	0.016285	0.449253	0.276331	0.12409	0.0227882	0.0210647	0.0206817	0.0162773	0.0135963	0.0109154	0.0450019	0.326058	0.365873	0.141799	0.0330688	0.0206349	0.0202381	0.0112434	0.0185185	0.0244709	0.0380952	Q9Y2Q9	28S ribosomal protein S28 mitochondrial OS=Homo sapiens OX=9606 GN=MRPS28 PE=1 SV=1	unknown	MITOCHONDRIA	0.961102	MITOCHONDRIA
Q96E29	0.339793	0.381823	0.125983	0.0469432	0.0144651	0.0103712	0.0196507	0.0250546	0.0218886	0.0140284	0.472823	0.298134	0.129666	0.0211198	0.00654879	0.00638507	0.0112967	0.0191552	0.0181729	0.0166994	0.309113	0.414819	0.140599	0.023399	0.012931	0.00862069	0.0131363	0.0211412	0.0254516	0.0307882	Q96E29	Transcription termination factor 3 mitochondrial OS=Homo sapiens OX=9606 GN=MTERF3 PE=1 SV=2	unknown	MITOCHONDRIA	0.95554	MITOCHONDRIA
Q96EY7	0.357158	0.424095	0.113291	0.0239435	0.0116357	0.0102075	0.0139251	0.0162144	0.0163404	0.01319	0.457086	0.26004	0.155965	0.0405943	0.0116083	0.0102528	0.0115214	0.0106352	0.014632	0.0276653	0.344693	0.387418	0.134426	0.0303111	0.0135391	0.0123781	0.0117708	0.0183081	0.0268639	0.0202908	Q96EY7	Pentatricopeptide repeat domain-containing protein 3 mitochondrial OS=Homo sapiens OX=9606 GN=PTCD3 PE=1 SV=3	unknown	MITOCHONDRIA	0.962125	MITOCHONDRIA
Q9H5Q4	0.321025	0.452028	0.131778	0.0433389	0.0107466	0.00704697	0.0101476	0.010958	0.00891441	0.00401677	0.464422	0.266755	0.161877	0.0408019	0.0118923	0.00656907	0.00914574	0.00911742	0.0103633	0.019056	0.335754	0.395657	0.150213	0.0259024	0.014557	0.0121483	0.0156741	0.0158137	0.0149061	0.0193744	Q9H5Q4	Dimethyladenosine transferase 2 mitochondrial OS=Homo sapiens OX=9606 GN=TFB2M PE=1 SV=1	unknown	MITOCHONDRIA	0.959912	MITOCHONDRIA
Q00059	0.382959	0.416446	0.0909525	0.0277401	0.014796	0.0110731	0.0147005	0.0178507	0.00945035	0.0140323	0.500053	0.275916	0.140907	0.0232755	0.00777028	0.00706389	0.00711687	0.00766432	0.0104016	0.0198319	0.413989	0.375653	0.131915	0.0154867	0.0103115	0.00948352	0.00883662	0.00996222	0.0139342	0.010428	Q00059	Transcription factor A mitochondrial OS=Homo sapiens OX=9606 GN=TFAM PE=1 SV=1	MITOCHONDRIA	MITOCHONDRIA	1	MITOCHONDRIA
Q6NVY1	0.264973	0.323538	0.125411	0.0724369	0.0302257	0.0285834	0.0348732	0.035572	0.0341394	0.0502481	0.368715	0.212994	0.14514	0.0531841	0.0303474	0.0220282	0.0193919	0.0219931	0.0274884	0.098717	0.271796	0.26046	0.146504	0.0485535	0.0356448	0.0305365	0.031104	0.0373151	0.0330987	0.104988	Q6NVY1	3-hydroxyisobutyryl-CoA hydrolase mitochondrial OS=Homo sapiens OX=9606 GN=HIBCH PE=1 SV=2	MITOCHONDRIA	MITOCHONDRIA	1	MITOCHONDRIA
P13073	0.340556	0.446444	0.138575	0.0364145	0.00834061	0.00622051	0.00667482	0.00605743	0.00400722	0.00670977	0.469516	0.27187	0.149506	0.0342838	0.0120279	0.0113708	0.0118279	0.0112279	0.0103137	0.0180561	0.363269	0.403469	0.158329	0.0245057	0.0119198	0.00635537	0.0073406	0.00878374	0.00849233	0.00753486	P13073	Cytochrome c oxidase subunit 4 isoform 1 mitochondrial OS=Homo sapiens OX=9606 GN=COX4I1 PE=1 SV=1	MITOCHONDRIA	MITOCHONDRIA	1	MITOCHONDRIA
Q96I99	0.356596	0.416822	0.117513	0.0302785	0.00960662	0.00842146	0.0125125	0.0146207	0.0116692	0.0219596	0.461937	0.276787	0.140378	0.0300512	0.0105304	0.0094621	0.0102529	0.0118068	0.0169263	0.0318687	0.350091	0.412142	0.141151	0.0236362	0.0122058	0.00931399	0.00958767	0.0117314	0.0097245	0.020416	Q96I99	Succinate--CoA ligase [GDP-forming] subunit beta mitochondrial OS=Homo sapiens OX=9606 GN=SUCLG2 PE=1 SV=2	unknown	MITOCHONDRIA	0.95941	MITOCHONDRIA
P24752	0.276995	0.45073	0.185002	0.0320065	0.00614078	0.00732495	0.0102008	0.00859371	0.0145146	0.00849221	0.447608	0.284006	0.137033	0.0371076	0.0156577	0.00956652	0.00908072	0.0143498	0.0150598	0.0305306	0.356512	0.428236	0.140762	0.0207935	0.00897351	0.00614316	0.00659344	0.00882878	0.00844282	0.0147146	P24752	Acetyl-CoA acetyltransferase mitochondrial OS=Homo sapiens OX=9606 GN=ACAT1 PE=1 SV=1	MITOCHONDRIA	MITOCHONDRIA	1	MITOCHONDRIA
P49748-2	0.340143	0.429809	0.142009	0.0320839	0.0066134	0.00712281	0.0101972	0.012065	0.0119935	0.00796289	0.469004	0.296259	0.149549	0.0279636	0.00824197	0.0061279	0.0072805	0.00841572	0.0112538	0.0159047	0.374374	0.390251	0.149971	0.0259425	0.0110185	0.0089714	0.00804219	0.00999967	0.00983458	0.011594	P49748-2	Isoform 2 of Very long-chain specific acyl-CoA dehydrogenase mitochondrial OS=Homo sapiens OX=9606 GN=ACADVL	unknown	MITOCHONDRIA	0.955836	MITOCHONDRIA
P25705	0.34426	0.447597	0.146328	0.02413	0.0050594	0.0062015	0.00800538	0.0068526	0.00637228	0.0051946	0.470989	0.29774	0.152561	0.0306762	0.00671535	0.00665892	0.00657991	0.00628647	0.00684326	0.0149506	0.371114	0.42335	0.147139	0.0168845	0.00733444	0.00669797	0.00634671	0.00590838	0.00517884	0.0100455	P25705	ATP synthase subunit alpha mitochondrial OS=Homo sapiens OX=9606 GN=ATP5F1A PE=1 SV=1	MITOCHONDRIA	MITOCHONDRIA	1	MITOCHONDRIA
P06576	0.369376	0.42261	0.130485	0.0267426	0.0079478	0.00773543	0.00879406	0.00818269	0.00678619	0.0113393	0.468026	0.301959	0.154842	0.0255755	0.00804939	0.00708389	0.0066711	0.00534178	0.00566711	0.0167844	0.37087	0.395861	0.152742	0.0249582	0.0103274	0.00688004	0.00684758	0.00757661	0.00730211	0.0166349	P06576	ATP synthase subunit beta mitochondrial OS=Homo sapiens OX=9606 GN=ATP5F1B PE=1 SV=3	MITOCHONDRIA	MITOCHONDRIA	1	MITOCHONDRIA
P31937	0.328197	0.439149	0.13611	0.0376512	0.00986306	0.00594642	0.0118928	0.0111495	0.00648961	0.013551	0.428671	0.275874	0.149186	0.0353036	0.0144714	0.0149992	0.0168324	0.0174157	0.0199989	0.0272485	0.330357	0.426139	0.147506	0.0253695	0.0111453	0.00680419	0.00997537	0.0108067	0.0107451	0.0211515	P31937	3-hydroxyisobutyrate dehydrogenase mitochondrial OS=Homo sapiens OX=9606 GN=HIBADH PE=1 SV=2	MITOCHONDRIA	MITOCHONDRIA	1	MITOCHONDRIA
P82663	0.32772	0.417824	0.127425	0.0239291	0.0129	0.0116199	0.0156573	0.0234367	0.0225505	0.0169375	0.423614	0.247296	0.143265	0.0400739	0.0196842	0.0200873	0.0196842	0.0209271	0.0225731	0.0427948	0.341853	0.361903	0.12906	0.0296526	0.017368	0.009037	0.00974301	0.0265462	0.0403841	0.0344535	P82663	28S ribosomal protein S25 mitochondrial OS=Homo sapiens OX=9606 GN=MRPS25 PE=1 SV=1	unknown	MITOCHONDRIA	0.962928	MITOCHONDRIA
Q9H9J2	0.315942	0.420613	0.117515	0.0478407	0.0117194	0.0154118	0.00674266	0.0247231	0.0147696	0.0247231	0.433122	0.261005	0.144643	0.0481861	0.0177774	0.0267086	0.0156509	0.0134394	0.016544	0.0229235	0.371171	0.366685	0.138998	0.0267598	0.0142719	0.0117743	0.0106529	0.0150874	0.0307355	0.0138641	Q9H9J2	39S ribosomal protein L44 mitochondrial OS=Homo sapiens OX=9606 GN=MRPL44 PE=1 SV=1	unknown	MITOCHONDRIA	0.960662	MITOCHONDRIA
P22033	0.335126	0.416621	0.119472	0.0330327	0.0111129	0.0120631	0.0185537	0.0220647	0.018747	0.0132066	0.47319	0.284877	0.15539	0.0275001	0.00728655	0.00726234	0.00864218	0.0110872	0.0112808	0.0134837	0.332583	0.377265	0.150537	0.0335018	0.0163082	0.0118068	0.0132458	0.0204036	0.0214736	0.0228757	P22033	Methylmalonyl-CoA mutase mitochondrial OS=Homo sapiens OX=9606 GN=MUT PE=1 SV=4	MITOCHONDRIA	MITOCHONDRIA	1	MITOCHONDRIA
P13804	0.351721	0.431657	0.141418	0.0330835	0.00786816	0.00567654	0.0065981	0.00554489	0.00454588	0.0118874	0.46573	0.300669	0.154719	0.0263726	0.00801158	0.00511776	0.00734841	0.00649098	0.00538571	0.0201562	0.365578	0.388547	0.156508	0.0329087	0.011174	0.00578464	0.00666403	0.00663983	0.0066963	0.0195	P13804	Electron transfer flavoprotein subunit alpha mitochondrial OS=Homo sapiens OX=9606 GN=ETFA PE=1 SV=1	MITOCHONDRIA	MITOCHONDRIA	1	MITOCHONDRIA
O76031	0.30838	0.43166	0.141229	0.0430221	0.0115867	0.0103489	0.0122488	0.0154442	0.0112269	0.0148541	0.449907	0.274062	0.147935	0.0324765	0.014329	0.0121836	0.0111207	0.0128922	0.0127544	0.0323387	0.355111	0.406955	0.147128	0.0242501	0.010324	0.00834895	0.00857338	0.0104923	0.0115471	0.0172702	O76031	ATP-dependent Clp protease ATP-binding subunit clpX-like mitochondrial OS=Homo sapiens OX=9606 GN=CLPX PE=1 SV=2	MITOCHONDRIA	MITOCHONDRIA	1	MITOCHONDRIA
P10515	0.316087	0.440212	0.131849	0.0327036	0.0109975	0.00940922	0.0116713	0.0193479	0.0160991	0.0116232	0.454398	0.263173	0.147401	0.0303592	0.0123215	0.0134394	0.0137188	0.0199939	0.0170977	0.0280982	0.357633	0.361943	0.144666	0.0321462	0.0137899	0.00934396	0.00944946	0.0235408	0.0289512	0.0185372	P10515	Dihydrolipoyllysine-residue acetyltransferase component of pyruvate dehydrogenase complex mitochondrial OS=Homo sapiens OX=9606 GN=DLAT PE=1 SV=3	MITOCHONDRIA	MITOCHONDRIA	1	MITOCHONDRIA
P48735	0.337327	0.431601	0.140884	0.0339568	0.007297	0.00698547	0.0104722	0.00947771	0.00697348	0.0150253	0.464741	0.286665	0.160126	0.0308124	0.00751121	0.00623924	0.00604187	0.0060309	0.00776341	0.0240688	0.358352	0.378875	0.151235	0.0325938	0.0147908	0.0077326	0.00780003	0.0100029	0.0106098	0.0280082	P48735	Isocitrate dehydrogenase [NADP] mitochondrial OS=Homo sapiens OX=9606 GN=IDH2 PE=1 SV=2	MITOCHONDRIA	MITOCHONDRIA	1	MITOCHONDRIA
P43897	0.315247	0.444654	0.134168	0.0304125	0.00751077	0.00993228	0.0157603	0.0155551	0.0156372	0.0111225	0.473524	0.298604	0.154396	0.029929	0.00367377	0.002988	0.00622092	0.0102866	0.0110703	0.00930688	0.315899	0.469877	0.137732	0.0260842	0.00934158	0.00586669	0.00830362	0.011959	0.00997337	0.00496412	P43897	Elongation factor Ts mitochondrial OS=Homo sapiens OX=9606 GN=TSFM PE=1 SV=2	MITOCHONDRIA	MITOCHONDRIA	1	MITOCHONDRIA
P55809	0.307709	0.42949	0.137657	0.0373441	0.0125552	0.0121267	0.0154047	0.0127266	0.0119124	0.0230749	0.461335	0.302653	0.155188	0.026646	0.00787616	0.00559174	0.00751816	0.00499506	0.0041938	0.0240035	0.353241	0.376013	0.149633	0.0328538	0.0167253	0.0108361	0.00956404	0.012595	0.0111659	0.027373	P55809	Succinyl-CoA:3-ketoacid coenzyme A transferase 1 mitochondrial OS=Homo sapiens OX=9606 GN=OXCT1 PE=1 SV=1	MITOCHONDRIA	MITOCHONDRIA	1	MITOCHONDRIA
P36542	0.313451	0.467275	0.145012	0.0291969	0.00551949	0.00782451	0.0092671	0.0094239	0.00699345	0.00603694	0.483991	0.299268	0.170632	0.0229946	0.00326644	0.00324653	0.00371458	0.00285814	0.00400339	0.006025	0.365267	0.414612	0.156416	0.0186455	0.00853352	0.00697414	0.00656277	0.00687847	0.00587397	0.0102364	P36542	ATP synthase subunit gamma mitochondrial OS=Homo sapiens OX=9606 GN=ATP5F1C PE=1 SV=1	MITOCHONDRIA	MITOCHONDRIA	1	MITOCHONDRIA
P11177	0.339338	0.435322	0.118645	0.0320464	0.00925073	0.00813319	0.0103579	0.0183773	0.0158007	0.0127275	0.439685	0.295096	0.138369	0.0301283	0.0142175	0.0107385	0.0134965	0.0167575	0.0179982	0.0235141	0.360384	0.386923	0.140816	0.0215451	0.0091232	0.00922701	0.0108187	0.0213144	0.0215566	0.0182925	P11177	Pyruvate dehydrogenase E1 component subunit beta mitochondrial OS=Homo sapiens OX=9606 GN=PDHB PE=1 SV=3	MITOCHONDRIA	MITOCHONDRIA	1	MITOCHONDRIA
Q16740	0.360446	0.427075	0.153649	0.0262953	0.0064624	0.00334262	0.00423398	0.00534819	0.00501393	0.0081337	0.451523	0.291786	0.162877	0.0373822	0.00826164	0.00754472	0.00614502	0.00710091	0.00679366	0.0205858	0.357597	0.396721	0.137825	0.0261039	0.0129545	0.0120455	0.0117857	0.0116558	0.0127922	0.0205195	Q16740	ATP-dependent Clp protease proteolytic subunit mitochondrial OS=Homo sapiens OX=9606 GN=CLPP PE=1 SV=1	MITOCHONDRIA	MITOCHONDRIA	1	MITOCHONDRIA
P31930	0.377534	0.416107	0.107792	0.0302791	0.0119534	0.0100459	0.0132391	0.0108513	0.00686683	0.0153303	0.457668	0.294205	0.151972	0.0289324	0.0105967	0.00797204	0.00791071	0.00762863	0.0069418	0.0261728	0.350758	0.358809	0.176486	0.0320884	0.0168147	0.0109979	0.0137522	0.01381	0.0130395	0.013444	P31930	Cytochrome b-c1 complex subunit 1 mitochondrial OS=Homo sapiens OX=9606 GN=UQCRC1 PE=1 SV=3	MITOCHONDRIA	MITOCHONDRIA	1	MITOCHONDRIA
P48047	0.319739	0.448933	0.129336	0.0324835	0.0109038	0.00828458	0.0121849	0.0137365	0.0119144	0.0124838	0.456058	0.297213	0.15719	0.0350172	0.00859112	0.00617771	0.0063295	0.00581342	0.00763486	0.0199751	0.38443	0.362472	0.155852	0.0214837	0.0111025	0.0103243	0.00979294	0.0133989	0.0122032	0.0189406	P48047	ATP synthase subunit O mitochondrial OS=Homo sapiens OX=9606 GN=ATP5O PE=1 SV=1	unknown	MITOCHONDRIA	0.957933	MITOCHONDRIA
P49406	0.349609	0.426073	0.113428	0.0301742	0.0121383	0.00809217	0.0108353	0.0181045	0.0218077	0.00973803	0.460334	0.274104	0.142755	0.0275905	0.0103205	0.0116596	0.0132296	0.0120521	0.0179627	0.0299917	0.343409	0.382278	0.142125	0.0311061	0.0154754	0.0125252	0.00967859	0.0160447	0.0262926	0.0210652	P49406	39S ribosomal protein L19 mitochondrial OS=Homo sapiens OX=9606 GN=MRPL19 PE=1 SV=2	unknown	MITOCHONDRIA	0.963346	MITOCHONDRIA
Q9BYD1	0.343116	0.41365	0.127163	0.040017	0.00721792	0.0103492	0.0170364	0.0170895	0.0168772	0.00748328	0.47993	0.247038	0.150812	0.03989	0.00824794	0.00849788	0.0113972	0.011997	0.0174456	0.0247438	0.322441	0.387008	0.135803	0.0238202	0.0178792	0.0126667	0.0195045	0.024773	0.030658	0.0254456	Q9BYD1	39S ribosomal protein L13 mitochondrial OS=Homo sapiens OX=9606 GN=MRPL13 PE=1 SV=1	unknown	MITOCHONDRIA	0.961014	MITOCHONDRIA
P83111	0.309929	0.409553	0.108716	0.0360891	0.0140315	0.0152663	0.0247516	0.036931	0.0214963	0.0232362	0.33327	0.240886	0.127696	0.0815041	0.0293949	0.0303493	0.0290132	0.0274862	0.0301584	0.0702424	0.310071	0.352602	0.125411	0.026998	0.0259625	0.0178631	0.0287733	0.0351714	0.0327305	0.0444173	P83111	Serine beta-lactamase-like protein LACTB mitochondrial OS=Homo sapiens OX=9606 GN=LACTB PE=1 SV=2	MITOCHONDRIA	MITOCHONDRIA	1	MITOCHONDRIA
Q9H845	0.37183	0.458284	0.111326	0.0238639	0.00555873	0.00446713	0.00648238	0.00806099	0.00592819	0.00419843	0.456412	0.280733	0.16109	0.0356354	0.0105177	0.00699324	0.00737246	0.00814205	0.00943586	0.0236677	0.369333	0.401094	0.144993	0.0209601	0.0117268	0.00819642	0.0102085	0.0104801	0.0109491	0.0120601	Q9H845	Acyl-CoA dehydrogenase family member 9 mitochondrial OS=Homo sapiens OX=9606 GN=ACAD9 PE=1 SV=1	MITOCHONDRIA	MITOCHONDRIA	1	MITOCHONDRIA
Q969S9	0.329649	0.380182	0.125148	0.048559	0.0173707	0.00868535	0.0169759	0.0189499	0.0142124	0.0402685	0.384184	0.243482	0.15083	0.0607628	0.026072	0.0129282	0.0120664	0.018746	0.0277957	0.0631329	0.322635	0.350507	0.144144	0.0329392	0.018018	0.00619369	0.0250563	0.00703829	0.0332207	0.0602477	Q969S9	Ribosome-releasing factor 2 mitochondrial OS=Homo sapiens OX=9606 GN=GFM2 PE=1 SV=1	unknown	MITOCHONDRIA	0.958702	MITOCHONDRIA
Q8IXM3	0.281357	0.437082	0.167876	0.0314794	0.00750285	0.0105611	0.0137009	0.0164737	0.0187164	0.0152504	0.458309	0.266091	0.143944	0.0428613	0.0182855	0.00614394	0.00965477	0.014921	0.020041	0.0197484	0.334431	0.39206	0.135767	0.0227883	0.0168127	0.0120018	0.00871018	0.0151415	0.0322074	0.0300805	Q8IXM3	39S ribosomal protein L41 mitochondrial OS=Homo sapiens OX=9606 GN=MRPL41 PE=1 SV=1	unknown	MITOCHONDRIA	0.954277	MITOCHONDRIA
Q9Y697	0.326911	0.41761	0.124041	0.0335081	0.0106542	0.0113166	0.0131935	0.0222468	0.0216947	0.0188242	0.432656	0.284903	0.143925	0.0277398	0.0136724	0.0102391	0.0115456	0.0203871	0.021572	0.0333607	0.374211	0.345675	0.139695	0.0296451	0.0176591	0.0107064	0.0173605	0.0206449	0.0223938	0.0220099	Q9Y697	Cysteine desulfurase mitochondrial OS=Homo sapiens OX=9606 GN=NFS1 PE=1 SV=3	unknown	MITOCHONDRIA	0.966204	MITOCHONDRIA
Q9HAV7	0.379976	0.396702	0.115508	0.0425599	0.0111504	0.00832352	0.013349	0.0124068	0.0046329	0.0153907	0.468562	0.287805	0.145331	0.0246805	0.0116041	0.00836123	0.0090098	0.00999141	0.0117793	0.0228751	0.346934	0.392466	0.153965	0.0318974	0.0138724	0.00948211	0.00807903	0.0125825	0.0111228	0.0195979	Q9HAV7	GrpE protein homolog 1 mitochondrial OS=Homo sapiens OX=9606 GN=GRPEL1 PE=1 SV=2	unknown	MITOCHONDRIA	0.958314	MITOCHONDRIA
Q16822	0.322534	0.391262	0.134316	0.0569373	0.017572	0.0119572	0.0155964	0.0165114	0.0123108	0.0210032	0.478774	0.270974	0.152572	0.028536	0.00647173	0.00845014	0.00409094	0.00281671	0.0063376	0.0409765	0.350311	0.373437	0.148465	0.0271702	0.0145564	0.00907446	0.0109639	0.013758	0.0126404	0.0396242	Q16822	Phosphoenolpyruvate carboxykinase [GTP] mitochondrial OS=Homo sapiens OX=9606 GN=PCK2 PE=1 SV=4	MITOCHONDRIA	MITOCHONDRIA	1	MITOCHONDRIA
Q9UMS0	0.336721	0.403116	0.1195	0.046013	0.0169198	0.011224	0.0141278	0.0155238	0.0165289	0.0203261	0.441573	0.28707	0.14525	0.0355348	0.0168302	0.0112866	0.0107282	0.0119646	0.0125229	0.0272394	0.366603	0.331013	0.157988	0.035196	0.0176308	0.0134283	0.0193053	0.0193053	0.013888	0.0256419	Q9UMS0	NFU1 iron-sulfur cluster scaffold homolog mitochondrial OS=Homo sapiens OX=9606 GN=NFU1 PE=1 SV=2	unknown	MITOCHONDRIA	0.966365	MITOCHONDRIA
Q9P2R7	0.348277	0.424357	0.135516	0.0281177	0.00906307	0.00934023	0.0114743	0.0120702	0.0106152	0.0111695	0.47455	0.279062	0.148816	0.0281475	0.00532074	0.00872302	0.00816847	0.0113309	0.0104766	0.0254047	0.365062	0.403542	0.144872	0.0197972	0.00948319	0.00856121	0.008237	0.0102532	0.00883476	0.0213574	Q9P2R7	Succinate--CoA ligase [ADP-forming] subunit beta mitochondrial OS=Homo sapiens OX=9606 GN=SUCLA2 PE=1 SV=3	unknown	MITOCHONDRIA	0.956997	MITOCHONDRIA
P38646	0.358543	0.427583	0.117282	0.0320445	0.0115177	0.00993981	0.0128493	0.0101889	0.00751141	0.01254	0.459745	0.283716	0.156333	0.0325191	0.00922849	0.00777263	0.00887133	0.00796937	0.00755168	0.0262932	0.353687	0.396711	0.152641	0.0266342	0.0109907	0.00812832	0.00852422	0.008801	0.00966989	0.0242133	P38646	Stress-70 protein mitochondrial OS=Homo sapiens OX=9606 GN=HSPA9 PE=1 SV=2	unknown	MITOCHONDRIA	0.959415	MITOCHONDRIA
P04179	0.333478	0.438772	0.137229	0.0370773	0.00494846	0.00615541	0.00796582	0.0070244	0.00666232	0.020687	0.444952	0.287781	0.150293	0.0359281	0.0123318	0.00699591	0.00800379	0.00877453	0.00687733	0.0380625	0.353228	0.390613	0.134669	0.0246167	0.0119633	0.0123248	0.0139681	0.0163016	0.0133108	0.0290043	P04179	Superoxide dismutase [Mn] mitochondrial OS=Homo sapiens OX=9606 GN=SOD2 PE=1 SV=3	MITOCHONDRIA	MITOCHONDRIA	1	MITOCHONDRIA
Q9BX68	0.375316	0.396179	0.116767	0.0414788	0.0114349	0.0102254	0.0103353	0.00970313	0.00725673	0.0213029	0.461197	0.282436	0.149454	0.0367039	0.0104754	0.00847627	0.00787653	0.0116749	0.00831634	0.0233897	0.362054	0.327825	0.169608	0.0446323	0.0211358	0.0141912	0.0145755	0.0152892	0.0106777	0.0200104	Q9BX68	Histidine triad nucleotide-binding protein 2 mitochondrial OS=Homo sapiens OX=9606 GN=HINT2 PE=1 SV=1	unknown	MITOCHONDRIA	0.958638	MITOCHONDRIA
P36551	0.235942	0.34997	0.129545	0.0535262	0.0210688	0.0322581	0.0451556	0.0350767	0.0511346	0.0463229	0.372795	0.266156	0.13519	0.0432219	0.0291086	0.0191736	0.0227948	0.0274373	0.0226555	0.061467	0.314146	0.322405	0.125129	0.0248828	0.0218145	0.0188513	0.0221928	0.0296745	0.0420949	0.0788097	P36551	Oxygen-dependent coproporphyrinogen-III oxidase mitochondrial OS=Homo sapiens OX=9606 GN=CPOX PE=1 SV=3	MITOCHONDRIA	MITOCHONDRIA	1	MITOCHONDRIA
O95571	0.316819	0.378568	0.112727	0.0430802	0.0202836	0.0193861	0.0294382	0.0263866	0.0129241	0.0403877	0.433132	0.2773	0.170916	0.0399405	0.0158806	0.0108349	0.0125876	0.00722328	0.00281496	0.0293711	0.331488	0.370575	0.16285	0.0348515	0.0127076	0.00981379	0.010359	0.0114494	0.0126657	0.0432394	O95571	Persulfide dioxygenase ETHE1 mitochondrial OS=Homo sapiens OX=9606 GN=ETHE1 PE=1 SV=2	unknown	MITOCHONDRIA	0.961648	MITOCHONDRIA
P00505	0.365677	0.409284	0.122014	0.0346317	0.011875	0.00853155	0.0120346	0.0115291	0.00951595	0.014908	0.459972	0.303441	0.134587	0.0224733	0.00995738	0.00898211	0.00975269	0.0101079	0.0109989	0.0297276	0.393797	0.365464	0.156172	0.0203019	0.00920104	0.00781529	0.00884343	0.00899988	0.00932024	0.0200858	P00505	Aspartate aminotransferase mitochondrial OS=Homo sapiens OX=9606 GN=GOT2 PE=1 SV=3	MITOCHONDRIA	MITOCHONDRIA	1	MITOCHONDRIA
Q5JRX3	0.349018	0.438331	0.122257	0.0309341	0.0104694	0.00828829	0.00906591	0.0115505	0.00859175	0.0114936	0.445385	0.247613	0.168767	0.040993	0.0138765	0.0124125	0.0122215	0.0133036	0.0165924	0.0288351	0.324993	0.352937	0.146226	0.0311498	0.0188588	0.0143552	0.0190777	0.0252389	0.0242068	0.0429561	Q5JRX3	Presequence protease mitochondrial OS=Homo sapiens OX=9606 GN=PITRM1 PE=1 SV=3	MITOCHONDRIA	MITOCHONDRIA	1	MITOCHONDRIA
Q16795	0.31932	0.434966	0.143381	0.0358568	0.0105909	0.0126445	0.0122753	0.0122061	0.00989871	0.00886038	0.466027	0.29085	0.162119	0.0391262	0.00842886	0.00455064	0.00595806	0.00451937	0.00472266	0.0136988	0.333147	0.403388	0.142423	0.0344761	0.0196897	0.0103448	0.0110754	0.011037	0.0124022	0.0220163	Q16795	NADH dehydrogenase [ubiquinone] 1 alpha subcomplex subunit 9 mitochondrial OS=Homo sapiens OX=9606 GN=NDUFA9 PE=1 SV=2	MITOCHONDRIA	MITOCHONDRIA	1	MITOCHONDRIA
O60313-2	0.311207	0.39339	0.144466	0.052403	0.0162398	0.0135145	0.0199607	0.0194629	0.0141243	0.0152318	0.418999	0.289985	0.182927	0.0450925	0.0132945	0.00947549	0.00936364	0.00831702	0.00720649	0.0153398	0.317448	0.385905	0.173957	0.0331885	0.0139892	0.0126738	0.0120927	0.0147233	0.0155288	0.0204943	O60313-2	Isoform 2 of Dynamin-like 120 kDa protein mitochondrial OS=Homo sapiens OX=9606 GN=OPA1	MITOCHONDRIA	MITOCHONDRIA	1	MITOCHONDRIA
Q9Y3B7	0.34283	0.440089	0.12577	0.0323914	0.00742303	0.00708562	0.00847744	0.0129903	0.0143189	0.00862505	0.48567	0.289308	0.146612	0.0264757	0.00798166	0.00523458	0.0065973	0.00780861	0.0129567	0.011356	0.363734	0.368341	0.136702	0.0243319	0.0130252	0.0143451	0.0113815	0.0190272	0.0270715	0.0220407	Q9Y3B7	39S ribosomal protein L11 mitochondrial OS=Homo sapiens OX=9606 GN=MRPL11 PE=1 SV=1	unknown	MITOCHONDRIA	0.957573	MITOCHONDRIA
P13995	0.327529	0.464149	0.136212	0.0193508	0.00496374	0.00732927	0.0093264	0.00889983	0.00955908	0.0126808	0.497301	0.298841	0.135905	0.0221642	0.00592815	0.00402584	0.00548575	0.00575119	0.00672447	0.0178729	0.396606	0.376023	0.148182	0.0307273	0.00903233	0.00602734	0.00602734	0.00486356	0.00649633	0.016015	P13995	Bifunctional methylenetetrahydrofolate dehydrogenase/cyclohydrolase mitochondrial OS=Homo sapiens OX=9606 GN=MTHFD2 PE=1 SV=2	MITOCHONDRIA	MITOCHONDRIA	1	MITOCHONDRIA
Q9Y3D9	0.320182	0.423534	0.118366	0.0232193	0.0111732	0.0122207	0.023743	0.0328212	0.0223464	0.0123953	0.462157	0.308678	0.13604	0.0263246	0.0107867	0.00798726	0.0088091	0.00767907	0.0121735	0.0193646	0.358145	0.404396	0.137675	0.0289464	0.0136641	0.00849515	0.00647249	0.0106077	0.0131248	0.0184736	Q9Y3D9	28S ribosomal protein S23 mitochondrial OS=Homo sapiens OX=9606 GN=MRPS23 PE=1 SV=2	unknown	MITOCHONDRIA	0.956925	MITOCHONDRIA
P82933	0.322531	0.431065	0.134127	0.0411008	0.0116086	0.00701448	0.00817982	0.0143427	0.0147909	0.0152391	0.475755	0.28391	0.15759	0.0322044	0.0112289	0.00745208	0.00816277	0.00349253	0.00759422	0.0126096	0.351995	0.398229	0.143568	0.0262242	0.0120095	0.00705265	0.00951288	0.0136497	0.0224883	0.0152716	P82933	28S ribosomal protein S9 mitochondrial OS=Homo sapiens OX=9606 GN=MRPS9 PE=1 SV=2	unknown	MITOCHONDRIA	0.958709	MITOCHONDRIA
P30049	0.431743	0.42259	0.108144	0.0206529	0.000567387	0.00105912	0.00370693	0.00393388	0.00181564	0.00578734	0.460298	0.308602	0.140909	0.0249456	0.0141277	0.00989856	0.00946952	0.00478073	0.00533235	0.0216359	0.383609	0.40205	0.150555	0.016228	0.00632813	0.00842457	0.00691047	0.00811398	0.00788105	0.00989984	P30049	ATP synthase subunit delta mitochondrial OS=Homo sapiens OX=9606 GN=ATP5F1D PE=1 SV=2	MITOCHONDRIA	MITOCHONDRIA	1	MITOCHONDRIA
Q9NUJ1	0.306139	0.414916	0.123976	0.0582626	0.0187751	0.0179556	0.0262256	0.0113247	0.00856802	0.0138578	0.429803	0.272962	0.145937	0.0343744	0.012259	0.00911723	0.0085628	0.0085012	0.0160168	0.0624653	0.369829	0.36953	0.151198	0.024823	0.0141602	0.0089994	0.00929796	0.0120276	0.0168046	0.0233302	Q9NUJ1	Mycophenolic acid acyl-glucuronide esterase mitochondrial OS=Homo sapiens OX=9606 GN=ABHD10 PE=1 SV=1	MITOCHONDRIA	MITOCHONDRIA	1	MITOCHONDRIA
P56385	0.341205	0.407618	0.128512	0.0358177	0.0120338	0.0119203	0.0176534	0.0178805	0.0171425	0.0102174	0.489941	0.281913	0.143745	0.0230432	0.00585223	0.0106072	0.00914411	0.0107901	0.0126189	0.0123446	0.367928	0.382759	0.144543	0.0256464	0.0132812	0.0124709	0.0132812	0.0121539	0.0132812	0.0146551	P56385	ATP synthase subunit e mitochondrial OS=Homo sapiens OX=9606 GN=ATP5I PE=1 SV=2	unknown	MITOCHONDRIA	0.961263	MITOCHONDRIA
P04181	0.374098	0.407211	0.120449	0.0354873	0.00853343	0.00923964	0.00951428	0.00900424	0.00870998	0.0177535	0.448135	0.281239	0.152021	0.0312852	0.0111455	0.0108382	0.00995718	0.0112069	0.0127436	0.0314286	0.337105	0.404512	0.156806	0.0257507	0.0100092	0.0080341	0.00907363	0.00975675	0.0116725	0.0272803	P04181	Ornithine aminotransferase mitochondrial OS=Homo sapiens OX=9606 GN=OAT PE=1 SV=1	MITOCHONDRIA	MITOCHONDRIA	1	MITOCHONDRIA
Q00325	0.291676	0.439253	0.153062	0.0365146	0.0150858	0.00854701	0.0135675	0.015796	0.00994294	0.0165552	0.476055	0.276084	0.166453	0.0361043	0.00662543	0.00618617	0.00761375	0.00451456	0.00527106	0.0150933	0.347375	0.437907	0.149566	0.0184862	0.0123575	0.00709472	0.00542929	0.00645075	0.00642855	0.00890448	Q00325	Phosphate carrier protein mitochondrial OS=Homo sapiens OX=9606 GN=SLC25A3 PE=1 SV=2	MITOCHONDRIA	MITOCHONDRIA	1	MITOCHONDRIA
Q8WVM0	0.331298	0.414083	0.142177	0.0337007	0.00864325	0.00340972	0.0105463	0.0213306	0.0207755	0.0140354	0.489839	0.297602	0.135034	0.023674	0.00782361	0.00904288	0.0075188	0.00701077	0.0137167	0.00873806	0.329376	0.351781	0.14195	0.042635	0.0317673	0.0117037	0.0132085	0.0219027	0.0362816	0.0193948	Q8WVM0	Dimethyladenosine transferase 1 mitochondrial OS=Homo sapiens OX=9606 GN=TFB1M PE=1 SV=1	unknown	MITOCHONDRIA	0.954895	MITOCHONDRIA
P50213	0.345343	0.442271	0.114274	0.0241843	0.00764117	0.0101246	0.0136013	0.0115764	0.011691	0.019294	0.50963	0.287337	0.140102	0.0220602	0.00153232	0.00356662	0.00618214	0.00874482	0.00766162	0.0131833	0.371925	0.412932	0.146419	0.0126028	0.00716502	0.00737293	0.0057576	0.00900425	0.00898826	0.0178326	P50213	Isocitrate dehydrogenase [NAD] subunit alpha mitochondrial OS=Homo sapiens OX=9606 GN=IDH3A PE=1 SV=1	MITOCHONDRIA	MITOCHONDRIA	1	MITOCHONDRIA
Q9BYC9	0.331882	0.425137	0.125623	0.0380781	0.0128084	0.0113572	0.0103477	0.0163733	0.0165941	0.0117989	0.428586	0.264422	0.153243	0.0420648	0.0138531	0.0140048	0.0149148	0.0158754	0.0171394	0.0358967	0.334091	0.37965	0.163452	0.0415817	0.0179162	0.00825618	0.00798877	0.0140054	0.02049	0.0125681	Q9BYC9	39S ribosomal protein L20 mitochondrial OS=Homo sapiens OX=9606 GN=MRPL20 PE=1 SV=1	unknown	MITOCHONDRIA	0.964528	MITOCHONDRIA
P30837	0.279737	0.442379	0.13765	0.0425699	0.0170167	0.0108952	0.0170729	0.0199371	0.016062	0.0166798	0.457692	0.278004	0.147396	0.0374606	0.0103972	0.0105807	0.00828721	0.00782851	0.00920461	0.0331488	0.339847	0.364406	0.159352	0.0371222	0.0133238	0.00984313	0.0131943	0.0129515	0.0128705	0.0370898	P30837	Aldehyde dehydrogenase X mitochondrial OS=Homo sapiens OX=9606 GN=ALDH1B1 PE=1 SV=3	MITOCHONDRIA	MITOCHONDRIA	1	MITOCHONDRIA
P30084	0.362777	0.415483	0.101075	0.0246448	0.0108664	0.0101101	0.0127951	0.0112698	0.00964363	0.0413352	0.465801	0.289611	0.148599	0.0260076	0.0071956	0.00750913	0.00788537	0.00978225	0.00823026	0.0293781	0.338919	0.383007	0.160898	0.0240681	0.0095273	0.0107432	0.0104434	0.0108431	0.0130751	0.0384756	P30084	Enoyl-CoA hydratase mitochondrial OS=Homo sapiens OX=9606 GN=ECHS1 PE=1 SV=4	MITOCHONDRIA	MITOCHONDRIA	1	MITOCHONDRIA
Q96A35	0.278664	0.425974	0.130612	0.0514533	0.0115028	0.00927644	0.0215213	0.0204082	0.0231293	0.0274583	0.462385	0.279118	0.144541	0.0310758	0.0111479	0.00932639	0.0103829	0.0112755	0.0166673	0.024081	0.298232	0.417688	0.138649	0.0417893	0.0176319	0.0083425	0.00926376	0.01712	0.0315787	0.0197047	Q96A35	39S ribosomal protein L24 mitochondrial OS=Homo sapiens OX=9606 GN=MRPL24 PE=1 SV=1	unknown	MITOCHONDRIA	0.956831	MITOCHONDRIA
A0A024QZ33	0.0265252	0.0383595	0.0487656	0.0803918	0.0669251	0.0587635	0.127729	0.245664	0.265048	0.0418282	0.0517914	0.0312167	0.0638524	0.0649166	0.0649166	0.0688187	0.0833629	0.221	0.242639	0.107485	0.0428139	0.0443518	0.0724314	0.0519919	0.0668254	0.0622116	0.0973359	0.198591	0.278266	0.0851813	A0A024QZ33	Coiled-coil domain containing 55 isoform CRA_a OS=Homo sapiens OX=9606 GN=NSRP1 PE=1 SV=1	unknown	NUCLEUS	0.961742	NUCLEUS
Q9ULH1	0.0750028	0.0845678	0.0786865	0.100299	0.065248	0.0597619	0.119334	0.217783	0.170574	0.0287426	0.121828	0.0515068	0.0924975	0.0891244	0.0800906	0.0631901	0.0705549	0.165935	0.20381	0.0614627	0.0662886	0.0649509	0.0899454	0.0693029	0.0707139	0.074333	0.111055	0.205517	0.221047	0.0268453	Q9ULH1	Arf-GAP with SH3 domain ANK repeat and PH domain-containing protein 1 OS=Homo sapiens OX=9606 GN=ASAP1 PE=1 SV=4	unknown	NUCLEUS	0.933482	NUCLEUS
Q96PE3	0.0407014	0.0477604	0.0534189	0.0924956	0.0624107	0.0720748	0.139724	0.22023	0.202135	0.0690496	0.0574697	0.0427535	0.0792068	0.0825313	0.089622	0.0713489	0.0794625	0.186614	0.205026	0.105965	0.0591167	0.0605854	0.0997692	0.0681914	0.0829836	0.0813051	0.103598	0.167069	0.149234	0.128147	Q96PE3	Type I inositol 34-bisphosphate 4-phosphatase OS=Homo sapiens OX=9606 GN=INPP4A PE=1 SV=1	unknown	NUCLEUS	0.957956	NUCLEUS
Q12872	0.0424168	0.0341519	0.0540541	0.0670688	0.0486391	0.0666888	0.13162	0.249276	0.265663	0.0404218	0.0672825	0.0366812	0.0614713	0.0656365	0.0855559	0.0600605	0.0855895	0.1869	0.227981	0.122842	0.0601435	0.0486338	0.0657915	0.0516257	0.0585865	0.0621584	0.104167	0.212334	0.251168	0.0853915	Q12872	Splicing factor suppressor of white-apricot homolog OS=Homo sapiens OX=9606 GN=SFSWAP PE=1 SV=3	unknown	NUCLEUS	0.970432	NUCLEUS
Q8IZL8	0.0950269	0.0314766	0.035173	0.0623276	0.0579772	0.0591999	0.109699	0.276664	0.241377	0.0310785	0.089776	0.0288095	0.0566575	0.056159	0.0575478	0.0595777	0.078416	0.238489	0.23742	0.0971475	0.0941959	0.0468397	0.0584286	0.0510685	0.0616889	0.0585577	0.095132	0.252631	0.239331	0.0421267	Q8IZL8	Proline- glutamic acid- and leucine-rich protein 1 OS=Homo sapiens OX=9606 GN=PELP1 PE=1 SV=2	unknown	NUCLEUS	0.967034	NUCLEUS
Q01970	0.0868012	0.0711064	0.0634042	0.108993	0.076152	0.0697892	0.127054	0.176795	0.150786	0.0691195	0.116061	0.0506857	0.081686	0.0891466	0.0889315	0.0708011	0.0767729	0.139501	0.171378	0.115035	0.086752	0.0898742	0.126052	0.0929423	0.0787186	0.0660559	0.0861448	0.14484	0.141219	0.0874024	Q01970	1-phosphatidylinositol 45-bisphosphate phosphodiesterase beta-3 OS=Homo sapiens OX=9606 GN=PLCB3 PE=1 SV=2	unknown	NUCLEUS	0.930969	NUCLEUS
H3BPE1	0.0897135	0.07462	0.05394	0.0825349	0.0558035	0.0628587	0.103922	0.194282	0.217212	0.065113	0.192229	0.0575772	0.065524	0.061079	0.0658424	0.0544645	0.0599196	0.143444	0.192327	0.107593	0.104522	0.0953534	0.092971	0.0626334	0.0633063	0.062503	0.0785766	0.152825	0.198339	0.0889701	H3BPE1	Microtubule-actin cross-linking factor 1 isoforms 1/2/3/5 OS=Homo sapiens OX=9606 GN=MACF1 PE=1 SV=1	unknown	NUCLEUS	0.927414	NUCLEUS
Q9H7N4	0.0612993	0.037418	0.0404918	0.0647278	0.0602353	0.0677425	0.11917	0.255837	0.261985	0.031093	0.0587302	0.0311287	0.0584656	0.0594356	0.0709877	0.0669753	0.0764991	0.204012	0.274691	0.0990741	0.0662438	0.0434692	0.0693636	0.0580283	0.0602121	0.078411	0.117512	0.24532	0.231697	0.0297421	Q9H7N4	Splicing factor arginine/serine-rich 19 OS=Homo sapiens OX=9606 GN=SCAF1 PE=1 SV=3	NUCLEUS	NUCLEUS	1	NUCLEUS
Q01813	0.0337633	0.0343008	0.0446265	0.0863426	0.0560016	0.0694865	0.139975	0.227809	0.219853	0.0878417	0.0464183	0.0309536	0.0663075	0.0632489	0.0785623	0.059922	0.077888	0.179016	0.224664	0.173019	0.0376221	0.049355	0.0843205	0.0568283	0.0592554	0.0517031	0.0690165	0.12931	0.189951	0.272638	Q01813	ATP-dependent 6-phosphofructokinase platelet type OS=Homo sapiens OX=9606 GN=PFKP PE=1 SV=2	unknown	NUCLEUS	0.887894	NUCLEUS
O43150	0.0777829	0.0725695	0.0671477	0.0960087	0.0637277	0.0764066	0.133002	0.19698	0.168537	0.0478375	0.110411	0.0447761	0.0748089	0.0689843	0.0758282	0.0631598	0.0748089	0.153404	0.182708	0.15111	0.0441502	0.0563716	0.0880451	0.0746328	0.0858617	0.0835649	0.11124	0.197527	0.202291	0.0563149	O43150	Arf-GAP with SH3 domain ANK repeat and PH domain-containing protein 2 OS=Homo sapiens OX=9606 GN=ASAP2 PE=1 SV=3	unknown	NUCLEUS	0.901601	NUCLEUS
M0R2P6	0.0706313	0.0692361	0.0659226	0.124346	0.0699337	0.0575514	0.107429	0.216777	0.203697	0.0144751	0.129376	0.0684932	0.0957382	0.10761	0.0869102	0.0458143	0.0707763	0.154795	0.182801	0.0576865	0.078656	0.0721331	0.106784	0.0776696	0.0744241	0.0718468	0.112034	0.20329	0.159698	0.0434644	M0R2P6	SH3KBP1 binding protein 1 isoform CRA_c OS=Homo sapiens OX=9606 GN=SHKBP1 PE=1 SV=1	unknown	NUCLEUS	0.905779	NUCLEUS
E7EUN2	0.0333704	0.0382647	0.0446051	0.0818687	0.070634	0.0862069	0.134372	0.237152	0.223582	0.0499444	0.0566922	0.0414162	0.0667843	0.0701483	0.0788617	0.0701483	0.0895605	0.192798	0.235262	0.098329	0.0446829	0.0563902	0.0964878	0.0629268	0.0743415	0.0796098	0.104098	0.168976	0.166341	0.146146	E7EUN2	Arf-GAP with GTPase ANK repeat and PH domain-containing protein 1 OS=Homo sapiens OX=9606 GN=AGAP1 PE=1 SV=1	unknown	NUCLEUS	0.960348	NUCLEUS
P17858	0.0379966	0.0332763	0.0399511	0.0682727	0.0567799	0.0654874	0.116961	0.267403	0.259106	0.0547667	0.0436844	0.0332975	0.0638947	0.0603545	0.0769288	0.0659466	0.0821807	0.212766	0.255877	0.10507	0.0456261	0.0452701	0.0793784	0.0536547	0.060722	0.054082	0.0665254	0.139264	0.239897	0.21558	P17858	ATP-dependent 6-phosphofructokinase liver type OS=Homo sapiens OX=9606 GN=PFKL PE=1 SV=6	unknown	NUCLEUS	0.91939	NUCLEUS
P23246	0.220865	0.046109	0.0298165	0.0767817	0.0558771	0.073507	0.191454	0.173862	0.123922	0.00780566	0.211236	0.0352802	0.0448678	0.0595396	0.0873822	0.0870529	0.157023	0.167976	0.116707	0.0329366	0.229795	0.0923754	0.057938	0.0579768	0.0708847	0.0750647	0.134349	0.184053	0.0905445	0.00701824	P23246	Splicing factor proline- and glutamine-rich OS=Homo sapiens OX=9606 GN=SFPQ PE=1 SV=2	unknown	NUCLEUS	0.920942	NUCLEUS
P08237	0.0332497	0.0330523	0.0422153	0.0776923	0.0516601	0.0596201	0.125133	0.283083	0.259955	0.0343398	0.0425523	0.0310295	0.0631649	0.0593626	0.0712119	0.057572	0.0750879	0.240694	0.286649	0.0726759	0.0357573	0.0429493	0.0736968	0.0564562	0.0597549	0.0595809	0.0858551	0.171536	0.216037	0.198376	P08237	ATP-dependent 6-phosphofructokinase muscle type OS=Homo sapiens OX=9606 GN=PFKM PE=1 SV=2	unknown	NUCLEUS	0.927703	NUCLEUS
Q15057	0.0789835	0.0669276	0.0716484	0.122905	0.0815083	0.0817772	0.134692	0.147943	0.147136	0.0664794	0.0965556	0.0518974	0.0882917	0.0776478	0.0862422	0.0683591	0.0703094	0.133347	0.190301	0.137049	0.0708108	0.0801213	0.114224	0.0824489	0.0765978	0.0742275	0.10171	0.130197	0.117534	0.152128	Q15057	Arf-GAP with coiled-coil ANK repeat and PH domain-containing protein 2 OS=Homo sapiens OX=9606 GN=ACAP2 PE=1 SV=3	unknown	NUCLEUS	0.884432	NUCLEUS
H0Y6E7	0.222973	0.0405291	0.0265268	0.0686237	0.0540989	0.0615776	0.171884	0.216431	0.128039	0.00931683	0.208048	0.0354029	0.0457067	0.0551976	0.0695255	0.0720455	0.136571	0.196179	0.144416	0.0369068	0.316775	0.0892548	0.0488206	0.0418682	0.0507175	0.0503817	0.096797	0.188021	0.105329	0.012035	H0Y6E7	RNA-binding motif protein X chromosome (Fragment) OS=Homo sapiens OX=9606 GN=RBMX PE=1 SV=2	unknown	NUCLEUS	0.927762	NUCLEUS
O95104	0.0844397	0.0347849	0.0406267	0.0804567	0.0387679	0.0483271	0.145247	0.252523	0.223314	0.0515135	0.0744505	0.0373626	0.0758242	0.0744505	0.0700549	0.0489011	0.0788462	0.185165	0.215934	0.139011	0.133346	0.0721412	0.0688795	0.0521873	0.0736761	0.0794321	0.120299	0.194743	0.185342	0.019954	O95104	Splicing factor arginine/serine-rich 15 OS=Homo sapiens OX=9606 GN=SCAF4 PE=1 SV=3	NUCLEUS	NUCLEUS	1	NUCLEUS
A0A1W2PP04	0.0351022	0.0294291	0.0465666	0.0839144	0.0553126	0.059922	0.131427	0.289328	0.235906	0.033093	0.0511059	0.0357108	0.0721037	0.0799474	0.0807269	0.0635292	0.0951476	0.213973	0.255481	0.0522752	0.0529173	0.0467676	0.0765668	0.0751623	0.0830581	0.0881449	0.137798	0.221273	0.198003	0.020309	A0A1W2PP04	RNA-binding motif protein X-linked 2 OS=Homo sapiens OX=9606 GN=RBMX2 PE=1 SV=1	unknown	NUCLEUS	0.898329	NUCLEUS
P08729	0.240148	0.0943353	0.0619686	0.0857855	0.0617544	0.0535636	0.0937764	0.129807	0.139766	0.0390949	0.343245	0.0649304	0.0723748	0.0712184	0.0709067	0.0594781	0.0587576	0.0853776	0.0869563	0.0867553	0.241435	0.149597	0.122915	0.0544873	0.045559	0.0428726	0.0566601	0.0883419	0.132601	0.0655309	P08729	Keratin type II cytoskeletal 7 OS=Homo sapiens OX=9606 GN=KRT7 PE=1 SV=5	unknown	NUCLEUS-CHROMATIN	0.893734	NUCLEUS-CHROMATIN
P08727	0.241932	0.0886943	0.0560382	0.0708887	0.0522272	0.0488733	0.0906765	0.133861	0.168251	0.0485585	0.332511	0.0722623	0.0613039	0.0599921	0.0666477	0.0566054	0.0681761	0.088979	0.102502	0.0910209	0.250828	0.154248	0.11549	0.0502875	0.039881	0.0373171	0.0571382	0.0893691	0.138321	0.0671206	P08727	Keratin type I cytoskeletal 19 OS=Homo sapiens OX=9606 GN=KRT19 PE=1 SV=4	unknown	NUCLEUS-CHROMATIN	0.887996	NUCLEUS-CHROMATIN
P05783	0.242866	0.0941417	0.0611668	0.0752193	0.0550213	0.0532669	0.092326	0.136122	0.153754	0.036116	0.350964	0.0700429	0.0706534	0.0722835	0.0705473	0.05758	0.070149	0.0915808	0.0850235	0.0611758	0.218637	0.170702	0.117035	0.0557511	0.0470331	0.0421623	0.0551129	0.0913883	0.127992	0.0741866	P05783	Keratin type I cytoskeletal 18 OS=Homo sapiens OX=9606 GN=KRT18 PE=1 SV=2	unknown	NUCLEUS-CHROMATIN	0.883216	NUCLEUS-CHROMATIN
Q13813	0.26162	0.169046	0.0972019	0.0961809	0.0481083	0.046102	0.073103	0.0720498	0.0716546	0.064933	0.378001	0.112443	0.0931209	0.0578196	0.0506846	0.0374833	0.0369359	0.051833	0.0614439	0.120234	0.235928	0.19945	0.147136	0.0594768	0.0416614	0.0338869	0.0412151	0.0669044	0.0775577	0.096783	Q13813	Spectrin alpha chain non-erythrocytic 1 OS=Homo sapiens OX=9606 GN=SPTAN1 PE=1 SV=3	unknown	NUCLEUS-CHROMATIN	0.770422	NUCLEUS-CHROMATIN
Q04695	0.318618	0.0980294	0.0511958	0.0631693	0.0475476	0.0381882	0.0725182	0.123677	0.144543	0.0425135	0.366625	0.0835377	0.0668954	0.0631165	0.0599691	0.0521584	0.0585585	0.0737903	0.0937062	0.081643	0.318807	0.149766	0.0978855	0.0469824	0.0375709	0.0341673	0.0517869	0.0762794	0.123356	0.0633985	Q04695	Keratin type I cytoskeletal 17 OS=Homo sapiens OX=9606 GN=KRT17 PE=1 SV=2	unknown	NUCLEUS-CHROMATIN	0.898615	NUCLEUS-CHROMATIN
Q01082	0.283304	0.182221	0.101122	0.0877675	0.0468463	0.0427877	0.064647	0.0716498	0.073537	0.0461171	0.403086	0.114191	0.0980836	0.0641395	0.0461884	0.0346068	0.0364694	0.0531951	0.0624213	0.0876192	0.249269	0.211683	0.144913	0.0556893	0.0390352	0.0325003	0.0392439	0.0637115	0.0775832	0.0863714	Q01082	Spectrin beta chain non-erythrocytic 1 OS=Homo sapiens OX=9606 GN=SPTBN1 PE=1 SV=2	unknown	NUCLEUS-CHROMATIN	0.719673	NUCLEUS-CHROMATIN
O15020	0.278633	0.178467	0.0896667	0.0849	0.0434	0.0433667	0.0658333	0.0796	0.0794333	0.0567	0.396274	0.115583	0.0928823	0.0623232	0.0458736	0.0347152	0.0326022	0.0562638	0.0701114	0.0933713	0.223687	0.191459	0.141784	0.0572729	0.0411293	0.0367319	0.0402404	0.0831002	0.10709	0.0775057	O15020	Spectrin beta chain non-erythrocytic 2 OS=Homo sapiens OX=9606 GN=SPTBN2 PE=1 SV=3	unknown	NUCLEUS-CHROMATIN	0.753254	NUCLEUS-CHROMATIN
P05787	0.242869	0.0871105	0.0533108	0.0829681	0.0563372	0.0494252	0.0947191	0.136015	0.142852	0.0543935	0.357897	0.0727508	0.0729371	0.0665557	0.0626574	0.0465695	0.0547407	0.0813359	0.0998432	0.084713	0.235791	0.137387	0.115674	0.0515377	0.0432122	0.0419612	0.0600986	0.0913537	0.138913	0.084072	P05787	Keratin type II cytoskeletal 8 OS=Homo sapiens OX=9606 GN=KRT8 PE=1 SV=7	unknown	NUCLEUS-CHROMATIN	0.89758	NUCLEUS-CHROMATIN
Q9NSB4	0.236633	0.0987804	0.0516511	0.081903	0.0486578	0.0556316	0.0916155	0.139413	0.159157	0.036557	0.390065	0.074633	0.0496973	0.0674245	0.0753517	0.0543142	0.0626987	0.0803824	0.0856309	0.0598023	0.213672	0.165961	0.108613	0.056382	0.0476494	0.0466631	0.0892784	0.0805663	0.118435	0.0727788	Q9NSB4	Keratin type II cuticular Hb2 OS=Homo sapiens OX=9606 GN=KRT82 PE=1 SV=3	unknown	NUCLEUS-CHROMATIN	0.870769	NUCLEUS-CHROMATIN
P13647	0.262901	0.0838064	0.0555399	0.091805	0.056533	0.0464487	0.107161	0.12053	0.136527	0.038748	0.287959	0.124589	0.0862864	0.075959	0.0758782	0.0558189	0.0672562	0.0788919	0.0946438	0.0527171	0.223508	0.163139	0.116878	0.0534575	0.0541728	0.051027	0.0689459	0.0758799	0.115017	0.0779747	P13647	Keratin type II cytoskeletal 5 OS=Homo sapiens OX=9606 GN=KRT5 PE=1 SV=3	unknown	NUCLEUS-CHROMATIN	0.868465	NUCLEUS-CHROMATIN
O00116	0.0531655	0.141869	0.23349	0.329934	0.113801	0.0572312	0.0409007	0.00936069	0.00692934	0.0133184	0.0642668	0.111426	0.284969	0.292364	0.150825	0.045993	0.0210106	0.00716616	0.0065944	0.0153844	0.0630804	0.14778	0.311295	0.218358	0.13153	0.0601587	0.0327018	0.0133107	0.00924516	0.0125402	O00116	Alkyldihydroxyacetonephosphate synthase peroxisomal OS=Homo sapiens OX=9606 GN=AGPS PE=1 SV=1	PEROXISOME	PEROXISOME	1	PEROXISOME
Q9NUI1	0.0560266	0.144275	0.25771	0.334904	0.107217	0.0475473	0.0323472	0.00533886	0.00910747	0.00552729	0.0633539	0.116838	0.269017	0.278671	0.149076	0.0561134	0.0257725	0.0081024	0.0106021	0.022454	0.0670149	0.152393	0.27645	0.207166	0.121629	0.0595219	0.0354599	0.0200517	0.0226901	0.0376233	Q9NUI1	Peroxisomal 24-dienoyl-CoA reductase OS=Homo sapiens OX=9606 GN=DECR2 PE=1 SV=1	PEROXISOME	PEROXISOME	1	PEROXISOME
Q02809	0.0598282	0.146205	0.207117	0.306899	0.122326	0.05628	0.046765	0.0235936	0.0208212	0.0101653	0.0709018	0.111616	0.268264	0.260494	0.153996	0.0525347	0.0299589	0.0138029	0.015469	0.0229627	0.0807338	0.158037	0.307397	0.203242	0.113654	0.0556668	0.0331879	0.0167278	0.0136738	0.0176797	Q02809	Procollagen-lysine2-oxoglutarate 5-dioxygenase 1 OS=Homo sapiens OX=9606 GN=PLOD1 PE=1 SV=2	unknown	PEROXISOME	0.632069	PEROXISOME
O60568	0.0664161	0.160772	0.228485	0.304393	0.124266	0.0543438	0.0347109	0.0128623	0.00815311	0.00559794	0.0704493	0.120081	0.282065	0.263502	0.152979	0.0535367	0.0267258	0.00969412	0.00864346	0.0123229	0.0777364	0.173188	0.329898	0.209271	0.109968	0.0475756	0.0263659	0.00937103	0.00684675	0.00977945	O60568	Procollagen-lysine2-oxoglutarate 5-dioxygenase 3 OS=Homo sapiens OX=9606 GN=PLOD3 PE=1 SV=1	unknown	PEROXISOME	0.725967	PEROXISOME
P09110	0.052105	0.147574	0.22777	0.331905	0.121994	0.0521238	0.0411365	0.00983576	0.00815556	0.00740042	0.0638887	0.118921	0.267008	0.29505	0.156617	0.0551414	0.0247194	0.00484481	0.00506228	0.00874724	0.0665533	0.144746	0.309891	0.233887	0.126278	0.0616843	0.0315192	0.00587744	0.0100838	0.00947881	P09110	3-ketoacyl-CoA thiolase peroxisomal OS=Homo sapiens OX=9606 GN=ACAA1 PE=1 SV=2	PEROXISOME	PEROXISOME	1	PEROXISOME
P16190	0.0683451	0.0880815	0.168213	0.19841	0.0974963	0.123579	0.175814	0.0464468	0.0212009	0.0124137	0.181441	0.0870915	0.147572	0.198056	0.137849	0.0963118	0.0890999	0.0279806	0.0145152	0.020084	0.179872	0.174562	0.222394	0.129531	0.0844588	0.0603337	0.0612117	0.0426475	0.0193168	0.0256721	P16190	HLA class I histocompatibility antigen A-33 alpha chain OS=Homo sapiens OX=9606 GN=HLA-A PE=1 SV=3	unknown	PM	0.768332	PM
P13746	0.0743435	0.103033	0.167859	0.209169	0.108705	0.117274	0.15729	0.0428441	0.0104653	0.00901709	0.161229	0.0823383	0.16189	0.193417	0.149448	0.0976728	0.104686	0.0265876	0.00894178	0.0137891	0.174803	0.208447	0.229037	0.136092	0.0910798	0.0558799	0.0533078	0.0337852	0.00913113	0.00843665	P13746	HLA class I histocompatibility antigen A-11 alpha chain OS=Homo sapiens OX=9606 GN=HLA-A PE=1 SV=1	unknown	PM	0.799711	PM
Q8N3E9	0.104932	0.108801	0.117021	0.172872	0.114362	0.114362	0.1603	0.0650387	0.0178917	0.0244197	0.190047	0.111969	0.131489	0.157658	0.109181	0.0755041	0.0688546	0.039039	0.045903	0.0703561	0.209687	0.187935	0.198569	0.113496	0.0758894	0.0428268	0.0523009	0.0459203	0.0274555	0.0459203	Q8N3E9	1-phosphatidylinositol 45-bisphosphate phosphodiesterase delta-3 OS=Homo sapiens OX=9606 GN=PLCD3 PE=1 SV=3	unknown	PM	0.752347	PM
P05187	0.102257	0.109017	0.129147	0.188399	0.126569	0.118184	0.152623	0.0505706	0.0118444	0.0113897	0.185882	0.0878787	0.170094	0.183886	0.14048	0.0868873	0.0839219	0.0242146	0.0117256	0.0250305	0.195018	0.209896	0.205187	0.139966	0.0769116	0.0518508	0.0565437	0.0313662	0.0130049	0.0202554	P05187	Alkaline phosphatase placental type OS=Homo sapiens OX=9606 GN=ALPP PE=1 SV=2	unknown	PM	0.875972	PM
P10696	0.106859	0.0972007	0.137899	0.205454	0.130565	0.114089	0.157732	0.0416796	0.00387357	0.00464828	0.188207	0.0854425	0.17609	0.175103	0.143511	0.0850835	0.0711721	0.0259379	0.00637229	0.0430802	0.208633	0.21838	0.198306	0.127872	0.0797169	0.0595266	0.0518682	0.0294732	0.00661406	0.0196101	P10696	Alkaline phosphatase placental-like OS=Homo sapiens OX=9606 GN=ALPPL2 PE=2 SV=4	unknown	PM	0.868939	PM
P30462	0.0772556	0.0985658	0.152629	0.188536	0.103041	0.142203	0.159292	0.0487234	0.0154104	0.0143424	0.132517	0.0840621	0.16453	0.213524	0.160997	0.0964303	0.0981073	0.0249461	0.00853498	0.0163512	0.167313	0.201421	0.221573	0.160058	0.0926999	0.0567283	0.057081	0.0320419	0.00725477	0.00382891	P30462	HLA class I histocompatibility antigen B-14 alpha chain OS=Homo sapiens OX=9606 GN=HLA-B PE=1 SV=1	unknown	PM	0.683395	PM
P11166	0.0843831	0.10668	0.139408	0.188303	0.119353	0.12187	0.182873	0.0431752	0.00883026	0.00512429	0.185581	0.0830206	0.150348	0.181923	0.130855	0.101357	0.0997522	0.0312448	0.0147493	0.0211681	0.190062	0.170811	0.208537	0.123707	0.0925865	0.0745346	0.0766501	0.0485615	0.00996615	0.00458349	P11166	Solute carrier family 2 facilitated glucose transporter member 1 OS=Homo sapiens OX=9606 GN=SLC2A1 PE=1 SV=2	PM	PM	1	PM
F5H2F4	0.0245822	0.0440095	0.0661312	0.118614	0.068338	0.0802175	0.182331	0.218239	0.183396	0.014143	0.0449554	0.0419568	0.0906736	0.100016	0.100577	0.0771569	0.11525	0.198137	0.192124	0.0391542	0.0302671	0.0484301	0.0879578	0.077767	0.0830654	0.0802019	0.142417	0.230475	0.183959	0.0354594	F5H2F4	C-1-tetrahydrofolate synthase cytoplasmic OS=Homo sapiens OX=9606 GN=MTHFD1 PE=1 SV=1	unknown	RIBOSOME	0.809142	RIBOSOME
I3L3Z2	0.0414807	0.0443686	0.0777107	0.124705	0.0974009	0.0748228	0.170386	0.222631	0.102914	0.043581	0.0532768	0.0408612	0.075279	0.0836084	0.107182	0.0892661	0.135628	0.15873	0.132328	0.123841	0.0380865	0.0433441	0.0985363	0.0876509	0.105719	0.117518	0.173771	0.175252	0.102041	0.0580801	I3L3Z2	N-alpha-acetyltransferase 38 NatC auxiliary subunit OS=Homo sapiens OX=9606 GN=NAA38 PE=1 SV=2	unknown	RIBOSOME	0.771316	RIBOSOME
P29558	0.0269471	0.0331909	0.0549458	0.121853	0.092606	0.0872166	0.218206	0.218929	0.126126	0.0199803	0.0508779	0.0390787	0.0913725	0.102794	0.114404	0.101661	0.135832	0.169907	0.141212	0.0528601	0.0433573	0.0537966	0.105574	0.0912485	0.0965825	0.10866	0.168781	0.204823	0.087972	0.0392045	P29558	RNA-binding motif single-stranded-interacting protein 1 OS=Homo sapiens OX=9606 GN=RBMS1 PE=1 SV=3	unknown	RIBOSOME	0.786028	RIBOSOME
P62701	0.0263479	0.0408995	0.0594478	0.116277	0.0736465	0.083989	0.180089	0.193616	0.199389	0.0262985	0.04584	0.0433243	0.0998695	0.107683	0.108609	0.0771561	0.105025	0.130061	0.192657	0.0897749	0.0334787	0.0503397	0.0924633	0.0855592	0.096939	0.0941372	0.140365	0.188592	0.194131	0.0239949	P62701	40S ribosomal protein S4 X isoform OS=Homo sapiens OX=9606 GN=RPS4X PE=1 SV=2	RIBOSOME	RIBOSOME	1	RIBOSOME
P19525	0.0237605	0.0393994	0.0570018	0.102827	0.067636	0.0777622	0.18512	0.239328	0.192212	0.0149524	0.0503493	0.0427858	0.0865161	0.0944041	0.0991989	0.0740856	0.109091	0.197547	0.204296	0.0417259	0.0367471	0.0499719	0.0804596	0.0793283	0.0907695	0.0892624	0.137306	0.207035	0.205325	0.0237948	P19525	Interferon-induced double-stranded RNA-activated protein kinase OS=Homo sapiens OX=9606 GN=EIF2AK2 PE=1 SV=2	unknown	RIBOSOME	0.805272	RIBOSOME
H0YGR4	0.0693239	0.0964481	0.0758623	0.110838	0.0638419	0.0968479	0.102815	0.0314356	0.0319781	0.320609	0.0323717	0.0491081	0.0495486	0.085664	0.0420612	0.174851	0.167804	0.0565955	0.0385378	0.303457	0.0860512	0.108881	0.14392	0.0719184	0.0768523	0.0609634	0.0734236	0.0690751	0.0556949	0.25322	H0YGR4	Oligoribonuclease mitochondrial (Fragment) OS=Homo sapiens OX=9606 GN=REXO2 PE=1 SV=1	unknown	CYTOSOL	0.342803	unknown
Q15434	0.0239365	0.0414105	0.0575982	0.114694	0.0844836	0.0930167	0.225687	0.221421	0.119996	0.0177563	0.0475997	0.041785	0.0895876	0.104665	0.114976	0.10453	0.143982	0.176504	0.137694	0.0386748	0.0360297	0.0503874	0.107024	0.0900291	0.106482	0.110455	0.181738	0.214769	0.0859836	0.0171028	Q15434	RNA-binding motif single-stranded-interacting protein 2 OS=Homo sapiens OX=9606 GN=RBMS2 PE=1 SV=1	unknown	RIBOSOME	0.701536	unknown
Q9NR28	0.34827	0.366896	0.087131	0.0266081	0.0260168	0.0205262	0.0228914	0.0206107	0.0188368	0.0622123	0.431108	0.299261	0.106836	0.0245719	0.0175906	0.0190748	0.0157766	0.00981227	0.012176	0.0637935	0.297942	0.343716	0.113644	0.0237417	0.0261475	0.0181703	0.0194998	0.0310858	0.0438746	0.0821779	Q9NR28	Diablo homolog mitochondrial OS=Homo sapiens OX=9606 GN=DIABLO PE=1 SV=1	unknown	MITOCHONDRIA	0.932278	unknown
O15327	0.0402555	0.0584276	0.0665509	0.106119	0.0745711	0.0999037	0.115772	0.114706	0.131331	0.192363	0.0461913	0.0397968	0.0762008	0.064572	0.0881264	0.0685382	0.0589398	0.0764302	0.101361	0.379844	0.0466131	0.0631445	0.107976	0.0673021	0.0690258	0.058393	0.0632028	0.0920848	0.0951186	0.33714	O15327	Type II inositol 34-bisphosphate 4-phosphatase OS=Homo sapiens OX=9606 GN=INPP4B PE=2 SV=4	unknown	CYTOSOL	0.748218	unknown
A0A087X0W9	0.019209	0.0294813	0.0437254	0.0782743	0.0487588	0.0604006	0.118062	0.196062	0.331758	0.0742681	0.0315676	0.0284865	0.0543243	0.0479459	0.0674595	0.064973	0.0707568	0.153081	0.284486	0.196919	0.0258051	0.030901	0.0479237	0.0341537	0.0392497	0.028082	0.0288409	0.129676	0.503415	0.131953	A0A087X0W9	OTU domain containing 6B isoform CRA_b OS=Homo sapiens OX=9606 GN=OTUD6B PE=1 SV=1	unknown	NUCLEUS	0.345089	unknown
Q9BXJ9	0.0260117	0.0381163	0.0590673	0.122541	0.0869176	0.0963276	0.251723	0.171092	0.107465	0.0407386	0.043628	0.0412862	0.0920783	0.100083	0.111683	0.0898626	0.123573	0.135126	0.136135	0.126545	0.0380565	0.0520953	0.0852138	0.0811795	0.0965203	0.0970556	0.14874	0.153943	0.105424	0.141772	Q9BXJ9	N-alpha-acetyltransferase 15 NatA auxiliary subunit OS=Homo sapiens OX=9606 GN=NAA15 PE=1 SV=1	unknown	RIBOSOME	0.428057	unknown
Q96Q11	0.148435	0.161587	0.0806724	0.087749	0.0550934	0.0611343	0.0740447	0.0492596	0.0452208	0.236805	0.180294	0.129362	0.100136	0.0482644	0.0670002	0.053873	0.0438381	0.024405	0.0270426	0.325784	0.135585	0.153741	0.115661	0.0501312	0.0513899	0.0450967	0.0437309	0.0512024	0.0495956	0.303867	Q96Q11	CCA tRNA nucleotidyltransferase 1 mitochondrial OS=Homo sapiens OX=9606 GN=TRNT1 PE=1 SV=2	unknown	NUCLEUS-CHROMATIN	0.347713	unknown
Q31612	0.0759636	0.115125	0.156478	0.228059	0.128441	0.11108	0.134229	0.0427576	0.00629284	0.00157321	0.0824977	0.0920693	0.198952	0.268004	0.176162	0.0893345	0.0628988	0.0102552	0.00364631	0.0161805	0.146159	0.176006	0.258181	0.156742	0.105486	0.0638381	0.051841	0.0283833	0.0068276	0.00653499	Q31612	HLA class I histocompatibility antigen B-73 alpha chain OS=Homo sapiens OX=9606 GN=HLA-B PE=1 SV=1	unknown	PM	0.37137	unknown
Q16775	0.1119	0.115775	0.0545852	0.0864629	0.0702511	0.068941	0.0824782	0.131659	0.0871725	0.190775	0.172777	0.119806	0.0905958	0.0590616	0.067436	0.0532917	0.0562167	0.0845053	0.0916376	0.204672	0.105058	0.0838594	0.108098	0.0590757	0.0618814	0.059933	0.0717013	0.0936014	0.0787156	0.278077	Q16775	Hydroxyacylglutathione hydrolase mitochondrial OS=Homo sapiens OX=9606 GN=HAGH PE=1 SV=2	unknown	NUCLEUS-CHROMATIN	0.356847	unknown
P35914	0.236801	0.315322	0.10537	0.112447	0.0470681	0.0307796	0.0288699	0.0312289	0.0390923	0.0530218	0.370338	0.235229	0.185499	0.0805369	0.0541314	0.023985	0.0115524	0.00440092	0.00935196	0.0249752	0.331133	0.237515	0.190283	0.076858	0.0484171	0.0352125	0.019807	0.0110039	0.0187913	0.0309802	P35914	Hydroxymethylglutaryl-CoA lyase mitochondrial OS=Homo sapiens OX=9606 GN=HMGCL PE=1 SV=2	unknown	MITOCHONDRIA	0.690899	unknown
E9PC15	0.327238	0.434557	0.160236	0.0433099	0.0102113	0.00452716	0.00485412	0.00490443	0.00362173	0.00653924	0.433998	0.29567	0.183807	0.0419335	0.00874119	0.0073716	0.00853978	0.00555891	0.00342397	0.0109567	0.308103	0.424702	0.173998	0.028656	0.0146909	0.0104811	0.00908748	0.00929071	0.0065035	0.0144877	E9PC15	Acylglycerol kinase mitochondrial OS=Homo sapiens OX=9606 GN=AGK PE=1 SV=1	unknown	MITOCHONDRIA	0.940494	unknown
P04183	0.0430881	0.0603488	0.0779155	0.133216	0.0783999	0.0782724	0.148922	0.161415	0.165749	0.0526745	0.0729478	0.0501333	0.0934911	0.0933875	0.105044	0.0778669	0.0922849	0.145076	0.174176	0.0955926	0.0592347	0.0769541	0.104655	0.0887393	0.0920862	0.0956942	0.118363	0.149102	0.134895	0.0802772	P04183	Thymidine kinase cytosolic OS=Homo sapiens OX=9606 GN=TK1 PE=1 SV=2	unknown	RIBOSOME	0.542929	unknown
P82914	0.331576	0.462657	0.133806	0.0302858	0.00499863	0.00341083	0.00580233	0.00905634	0.013957	0.00444976	0.45565	0.292374	0.144668	0.0302256	0.010027	0.00940031	0.00814693	0.00968955	0.0123409	0.0274778	0.291165	0.436748	0.125812	0.0356698	0.0217061	0.0125121	0.0125812	0.0182497	0.023296	0.0222591	P82914	28S ribosomal protein S15 mitochondrial OS=Homo sapiens OX=9606 GN=MRPS15 PE=1 SV=1	unknown	MITOCHONDRIA	0.947253	unknown
C9JG87	0.341375	0.442861	0.116301	0.0283332	0.00828409	0.0086079	0.010038	0.0138968	0.0164602	0.0138428	0.466954	0.256747	0.152018	0.0383554	0.0136583	0.0074372	0.00879368	0.0116469	0.0208148	0.0235745	0.347857	0.417155	0.139234	0.0207969	0.0090064	0.00759155	0.00743941	0.0122165	0.0242656	0.0144376	C9JG87	39S ribosomal protein L39 mitochondrial (Fragment) OS=Homo sapiens OX=9606 GN=MRPL39 PE=1 SV=1	unknown	MITOCHONDRIA	0.954047	unknown
Q9Y224	0.0384873	0.0374788	0.0502393	0.0877283	0.0549318	0.0733625	0.155524	0.253892	0.237921	0.0104348	0.050418	0.0419206	0.071549	0.075494	0.101928	0.0673105	0.110712	0.221902	0.196901	0.061864	0.0460786	0.0511718	0.0917407	0.0855034	0.0916175	0.0925387	0.161619	0.231221	0.115951	0.0325596	Q9Y224	RNA transcription translation and transport factor protein OS=Homo sapiens OX=9606 GN=RTRAF PE=1 SV=1	unknown	RIBOSOME	0.599683	unknown
Q96EY1	0.31581	0.475007	0.127927	0.0392858	0.00798304	0.00573056	0.00884428	0.0100036	0.00702243	0.00238497	0.47397	0.289397	0.15001	0.0265573	0.00874829	0.00585823	0.0059754	0.00929506	0.0108963	0.0192931	0.353668	0.324899	0.166089	0.0343732	0.017851	0.0141537	0.0131138	0.0256499	0.033911	0.0162912	Q96EY1	DnaJ homolog subfamily A member 3 mitochondrial OS=Homo sapiens OX=9606 GN=DNAJA3 PE=1 SV=2	unknown	MITOCHONDRIA	0.952448	unknown
A0A0C4DGA2	0.130768	0.237484	0.208179	0.258035	0.0824961	0.0326816	0.0265122	0.0085039	0.00691984	0.00842053	0.181347	0.15226	0.236926	0.199829	0.104656	0.0388566	0.0235753	0.0143094	0.0162531	0.0319867	0.173272	0.216195	0.260554	0.156432	0.0900083	0.0481057	0.022169	0.00942964	0.0113239	0.0125104	A0A0C4DGA2	Enoyl-CoA delta isomerase 2 mitochondrial OS=Homo sapiens OX=9606 GN=ECI2 PE=1 SV=1	unknown	PEROXISOME	0.242327	unknown
P56192	0.0277806	0.0512635	0.0758047	0.130404	0.0701647	0.0771534	0.0845358	0.0920988	0.199653	0.191141	0.0287798	0.04113	0.0877458	0.0857526	0.0897482	0.0594317	0.0430114	0.0462898	0.13859	0.379521	0.0353923	0.04814	0.0954856	0.0590548	0.054719	0.0367476	0.0393387	0.0852459	0.31553	0.230346	P56192	Methionine--tRNA ligase cytoplasmic OS=Homo sapiens OX=9606 GN=MARS PE=1 SV=2	unknown	PROTEASOME	0.504532	unknown
A0A0U1RRK1	0.267684	0.368108	0.131524	0.0532052	0.0204777	0.0198637	0.0329731	0.0470036	0.0444861	0.0146752	0.420698	0.252701	0.159386	0.0466573	0.0219195	0.0112729	0.0122123	0.027556	0.0216064	0.0259903	0.335889	0.257715	0.163269	0.0432018	0.0209463	0.0274921	0.0209463	0.0372171	0.0374042	0.0559192	A0A0U1RRK1	Calcium uptake protein 1 mitochondrial OS=Homo sapiens OX=9606 GN=MICU1 PE=1 SV=1	unknown	MITOCHONDRIA	0.937694	unknown
P21281	0.0454535	0.131195	0.144288	0.193896	0.0967909	0.0824407	0.0895821	0.0712794	0.0525725	0.0925015	0.056862	0.0972602	0.186599	0.141712	0.0905039	0.0750342	0.0666936	0.0470148	0.0537556	0.184564	0.0525927	0.107945	0.203632	0.115164	0.0672038	0.0595902	0.0588141	0.0793387	0.0763204	0.179399	P21281	V-type proton ATPase subunit B brain isoform OS=Homo sapiens OX=9606 GN=ATP6V1B2 PE=1 SV=3	unknown	GOLGI	0.207401	unknown
J3KS15	0.283213	0.407942	0.164982	0.0472924	0.0106498	0.0194946	0.0185921	0.0158845	0.0193141	0.0126354	0.408939	0.274503	0.131696	0.0355621	0.0199878	0.0181615	0.02014	0.0201907	0.0248072	0.0460126	0.333047	0.428279	0.142716	0.0209351	0.00752873	0.00607582	0.00673623	0.0122837	0.0245014	0.0178972	J3KS15	Peptidyl-tRNA hydrolase ICT1 mitochondrial (Fragment) OS=Homo sapiens OX=9606 GN=MRPL58 PE=1 SV=1	unknown	MITOCHONDRIA	0.948126	unknown
P35908	0.144199	0.0497563	0.0696112	0.144878	0.0582486	0.0514717	0.106714	0.0635817	0.157421	0.154118	0.171382	0.129136	0.0553491	0.0551245	0.062097	0.0661213	0.137091	0.146525	0.0852699	0.0919054	0.144606	0.0702846	0.2271	0.0686368	0.0925703	0.135972	0.110671	0.0400567	0.055323	0.0547793	P35908	Keratin type II cytoskeletal 2 epidermal OS=Homo sapiens OX=9606 GN=KRT2 PE=1 SV=2	unknown	NUCLEUS	0.321332	unknown
P02533	0.512108	0.0553059	0.014623	0.0514824	0.0452777	0.0272672	0.0865307	0.064462	0.0766702	0.0662731	0.103001	0.362457	0.0619337	0.0570288	0.0678361	0.0936902	0.0515421	0.0418156	0.0986782	0.0620168	0.0970166	0.0631787	0.244324	0.0554459	0.0796863	0.0884611	0.0896677	0.0410223	0.0666886	0.174509	P02533	Keratin type I cytoskeletal 14 OS=Homo sapiens OX=9606 GN=KRT14 PE=1 SV=4	unknown	NUCLEUS-CHROMATIN	0.305712	unknown
Q92947	0.302684	0.31004	0.0733832	0.0507903	0.0295547	0.0278471	0.053505	0.0629187	0.051053	0.0382241	0.467173	0.273899	0.150242	0.0255209	0.00894378	0.0104836	0.010287	0.0118923	0.0116302	0.0299273	0.350541	0.348506	0.152565	0.0280069	0.016199	0.0145925	0.0162258	0.0210721	0.0220092	0.0302827	Q92947	Glutaryl-CoA dehydrogenase mitochondrial OS=Homo sapiens OX=9606 GN=GCDH PE=1 SV=1	unknown	MITOCHONDRIA	0.911216	unknown
Q15746	0.0802839	0.0770846	0.0731854	0.122076	0.0707858	0.0783843	0.111178	0.144471	0.122176	0.120376	0.137929	0.0624606	0.108189	0.0967853	0.0869291	0.0678471	0.0703112	0.105152	0.115982	0.148416	0.109445	0.121055	0.133397	0.0795762	0.0661632	0.0623873	0.0831267	0.110516	0.0947926	0.13954	Q15746	Myosin light chain kinase smooth muscle OS=Homo sapiens OX=9606 GN=MYLK PE=1 SV=4	unknown	NUCLEUS	0.631434	unknown
P49903	0.142277	0.0703258	0.0696609	0.0996159	0.0781931	0.0855064	0.103605	0.118786	0.0981015	0.133929	0.138322	0.0542943	0.0829734	0.0752386	0.0873933	0.0785033	0.078453	0.107132	0.0963837	0.201306	0.20498	0.101961	0.0888297	0.062326	0.0622655	0.0576062	0.0728852	0.0956977	0.0788152	0.174634	P49903	Selenide water dikinase 1 OS=Homo sapiens OX=9606 GN=SEPHS1 PE=1 SV=2	unknown	NUCLEUS	0.44913	unknown
Q02338	0.352579	0.398959	0.12778	0.0515854	0.00615239	0.0104117	0.0146711	0.0175106	0.0104117	0.00993848	0.476672	0.285475	0.14916	0.0314769	0.00619384	0.00624461	0.0114231	0.00898614	0.00659999	0.0177692	0.266985	0.329018	0.143438	0.0444581	0.0281584	0.0228669	0.0310876	0.0445998	0.043277	0.0461117	Q02338	D-beta-hydroxybutyrate dehydrogenase mitochondrial OS=Homo sapiens OX=9606 GN=BDH1 PE=1 SV=3	unknown	MITOCHONDRIA	0.947304	unknown
Q96GC5	0.323766	0.453669	0.133553	0.038482	0.00992169	0.00694518	0.00690975	0.0111973	0.013288	0.00226781	0.481867	0.315189	0.140342	0.0233786	0.0035913	0.0040138	0.00535174	0.00514048	0.0111964	0.00992888	0.361823	0.38599	0.14375	0.0289583	0.0186458	0.0078125	0.00869792	0.0119271	0.0196875	0.0127083	Q96GC5	39S ribosomal protein L48 mitochondrial OS=Homo sapiens OX=9606 GN=MRPL48 PE=1 SV=2	unknown	MITOCHONDRIA	0.949837	unknown
O95861	0.0461863	0.0668151	0.0631782	0.110577	0.0808856	0.0928495	0.101137	0.0418936	0.0403832	0.356095	0.0628851	0.0605208	0.0994412	0.0661628	0.107286	0.0863125	0.0633866	0.0342456	0.0423771	0.377382	0.0652633	0.0905399	0.14793	0.0885717	0.0979157	0.0842622	0.087225	0.0937099	0.0766171	0.167965	O95861	3'(2')5'-bisphosphate nucleotidase 1 OS=Homo sapiens OX=9606 GN=BPNT1 PE=1 SV=1	unknown	CYTOSOL	0.845624	unknown
D6RJ90	0.0431207	0.0843919	0.128681	0.219691	0.134472	0.110673	0.0998199	0.0626856	0.0683798	0.0480849	0.0632322	0.072608	0.141926	0.171956	0.17255	0.0930841	0.071042	0.0682075	0.0668596	0.0785348	0.0493241	0.0906642	0.185737	0.160756	0.138274	0.096395	0.0820435	0.0551038	0.0482465	0.0934561	D6RJ90	COMM domain containing 10 isoform CRA_b OS=Homo sapiens OX=9606 GN=COMMD10 PE=1 SV=1	unknown	ER	0.446928	unknown
Q86WA8	0.0670281	0.138492	0.190981	0.29793	0.127156	0.0771316	0.0556925	0.0285855	0.0118285	0.00517496	0.0562061	0.11297	0.295305	0.304673	0.158581	0.0411509	0.019516	0.00122672	0.00379168	0.00657968	0.0585909	0.147735	0.300503	0.194824	0.160676	0.0593098	0.0276779	0.00682962	0.0140187	0.0298347	Q86WA8	Lon protease homolog 2 peroxisomal OS=Homo sapiens OX=9606 GN=LONP2 PE=1 SV=1	unknown	PEROXISOME	0.443199	unknown
G3V1L9	0.115806	0.0729147	0.0613067	0.0872035	0.0550219	0.0559197	0.102505	0.18612	0.207088	0.056114	0.161056	0.0560841	0.0734592	0.0671952	0.0670477	0.0589148	0.0726866	0.165739	0.190308	0.0875099	0.168707	0.138932	0.124615	0.0604776	0.0511828	0.0456393	0.0577178	0.113766	0.148342	0.090621	G3V1L9	Tight junction protein 1 (Zona occludens 1) isoform CRA_a OS=Homo sapiens OX=9606 GN=TJP1 PE=1 SV=1	unknown	NUCLEUS	0.777766	unknown
P13645	0.104314	0.0465885	0.0684101	0.112353	0.0675791	0.0500314	0.0984855	0.0655552	0.247087	0.139596	0.131868	0.178249	0.0495866	0.0532204	0.0852186	0.0938968	0.145323	0.125636	0.0707909	0.0662107	0.120793	0.0629138	0.233487	0.0822393	0.0806633	0.118916	0.140119	0.0449909	0.0496119	0.0662648	P13645	Keratin type I cytoskeletal 10 OS=Homo sapiens OX=9606 GN=KRT10 PE=1 SV=6	unknown	NUCLEUS	0.334336	unknown
P04264	0.163887	0.0692265	0.0563763	0.0725768	0.0606033	0.0454141	0.165672	0.0711866	0.16927	0.125787	0.0941217	0.400141	0.0738381	0.047752	0.0875643	0.0567973	0.0422365	0.0321944	0.107425	0.0579296	0.104638	0.0534548	0.261523	0.0728853	0.0879322	0.130697	0.134616	0.0318473	0.0607166	0.0616904	P04264	Keratin type II cytoskeletal 1 OS=Homo sapiens OX=9606 GN=KRT1 PE=1 SV=6	unknown	NUCLEUS-CHROMATIN	0.282856	unknown
Q9BYT8	0.14734	0.174297	0.0870563	0.0996743	0.0485262	0.0649337	0.0816076	0.0237408	0.0227985	0.250026	0.185474	0.129842	0.101447	0.0466254	0.0576157	0.0443521	0.0345057	0.0138139	0.0222991	0.364026	0.128189	0.163297	0.116015	0.0533788	0.0516915	0.0396286	0.0435346	0.0436838	0.041549	0.319033	Q9BYT8	Neurolysin mitochondrial OS=Homo sapiens OX=9606 GN=NLN PE=1 SV=1	unknown	NUCLEUS-CHROMATIN	0.31803	unknown
P02538	0.76454	0.0365873	0.00140929	0.0171283	0.0287278	0.0168031	0.0344192	0.031167	0.0405442	0.0286736	0.0833084	0.265508	0.0883029	0.0358606	0.0885026	0.135551	0.0471481	0.0486465	0.129358	0.0778144	0.065197	0.0628518	0.224672	0.0551126	0.0731707	0.0579268	0.0612101	0.0541745	0.0731707	0.272514	P02538	Keratin type II cytoskeletal 6A OS=Homo sapiens OX=9606 GN=KRT6A PE=1 SV=3	unknown	NUCLEUS-CHROMATIN	0.283783	unknown
E9PJX4	0.0469704	0.0612933	0.0676122	0.119076	0.0817946	0.0834094	0.120691	0.165976	0.151373	0.101804	0.0512492	0.0477258	0.116912	0.0663037	0.107944	0.069827	0.0717489	0.0944907	0.151826	0.221973	0.0690537	0.0768211	0.129014	0.0729374	0.0856304	0.0756844	0.0849673	0.121247	0.109785	0.17486	E9PJX4	FYVE RhoGEF and PH domain-containing protein 4 OS=Homo sapiens OX=9606 GN=FGD4 PE=1 SV=1	unknown	NUCLEUS	0.744228	unknown
O94925-3	0.324337	0.462353	0.137347	0.0275675	0.0087438	0.00610136	0.00751165	0.00927823	0.00699207	0.00976812	0.457092	0.270581	0.16372	0.035319	0.0111788	0.00840575	0.00870286	0.00727921	0.00997796	0.0277427	0.326422	0.426243	0.160752	0.0243205	0.0106872	0.00765485	0.00833282	0.00877658	0.00871495	0.0180955	O94925-3	Isoform 3 of Glutaminase kidney isoform mitochondrial OS=Homo sapiens OX=9606 GN=GLS	unknown	MITOCHONDRIA	0.950913	unknown
Q9NP58	0.0502186	0.223561	0.242349	0.264563	0.0849581	0.0539998	0.0425381	0.0129978	0.0157155	0.00909843	0.0644534	0.167939	0.306109	0.239782	0.0908641	0.037972	0.0275421	0.0147787	0.0130462	0.0375124	0.0724282	0.200513	0.343339	0.186839	0.0837517	0.0446533	0.0288431	0.0162376	0.00961436	0.0137806	Q9NP58	ATP-binding cassette sub-family B member 6 mitochondrial OS=Homo sapiens OX=9606 GN=ABCB6 PE=1 SV=1	unknown	LYSOSOME	0.497905	unknown
E7EPT4	0.366019	0.417434	0.131549	0.0434929	0.00789111	0.00761584	0.0103686	0.00532191	0.00348677	0.00682061	0.489084	0.303291	0.143993	0.0208199	0.00684806	0.00634249	0.00636547	0.00459601	0.00471091	0.0139489	0.346168	0.431524	0.139012	0.0199509	0.00993965	0.00909791	0.0094561	0.00972473	0.00866809	0.0164586	E7EPT4	NADH dehydrogenase [ubiquinone] flavoprotein 2 mitochondrial OS=Homo sapiens OX=9606 GN=NDUFV2 PE=1 SV=1	unknown	MITOCHONDRIA	0.946101	unknown
Q96P47	0.0386663	0.0429848	0.0396706	0.0908908	0.0706036	0.0763282	0.124134	0.23712	0.2094	0.0702019	0.0475508	0.0332139	0.0762246	0.0664277	0.0805257	0.0700119	0.069773	0.192354	0.216965	0.146953	0.041543	0.0445104	0.108803	0.0365974	0.0702275	0.0939664	0.0623145	0.130564	0.101879	0.309594	Q96P47	Arf-GAP with GTPase ANK repeat and PH domain-containing protein 3 OS=Homo sapiens OX=9606 GN=AGAP3 PE=1 SV=2	unknown	NUCLEUS	0.810054	unknown
Q96P48-1	0.0946565	0.112468	0.0844784	0.147583	0.0463104	0.0575064	0.115522	0.13944	0.119593	0.0824427	0.108727	0.0722461	0.120887	0.0951359	0.0901288	0.0979971	0.0779685	0.0901288	0.0922747	0.154506	0.0989011	0.0586081	0.102564	0.0879121	0.0613553	0.0888278	0.130037	0.0989011	0.100733	0.172161	Q96P48-1	Isoform 1 of Arf-GAP with Rho-GAP domain ANK repeat and PH domain-containing protein 1 OS=Homo sapiens OX=9606 GN=ARAP1	unknown	NUCLEUS	0.539845	unknown
Q9P2J5	0.0276903	0.0499293	0.0719032	0.135639	0.0768742	0.087685	0.111433	0.058225	0.0939091	0.286712	0.0298638	0.0373862	0.078811	0.0603113	0.0824773	0.0646507	0.0460185	0.0255638	0.0521194	0.522798	0.0303653	0.049666	0.0904008	0.0564065	0.0541075	0.0411651	0.0410478	0.0708624	0.278151	0.287828	Q9P2J5	Leucine--tRNA ligase cytoplasmic OS=Homo sapiens OX=9606 GN=LARS PE=1 SV=2	unknown	CYTOSOL	0.471345	unknown
G5E9E7	0.109843	0.0751969	0.0622047	0.065748	0.0574803	0.0503937	0.0972441	0.219685	0.208661	0.0535433	0.152865	0.0356347	0.0718769	0.0708645	0.0546669	0.0595262	0.0643855	0.188702	0.204697	0.0967807	0.166886	0.131406	0.108804	0.0659658	0.0491459	0.039159	0.0470434	0.1159	0.155059	0.120631	G5E9E7	Tight junction protein 1 (Zona occludens 1) isoform CRA_e OS=Homo sapiens OX=9606 GN=TJP1 PE=1 SV=1	unknown	NUCLEUS	0.783047	unknown
O43572	0.0615942	0.0905797	0.0873188	0.101812	0.065942	0.0753623	0.182246	0.15	0.154348	0.0307971	0.10991	0.0471651	0.0886747	0.0843352	0.0954329	0.0739489	0.085509	0.130078	0.162197	0.12275	0.0449937	0.0697085	0.0965357	0.0650613	0.0796367	0.0927334	0.106675	0.178707	0.144698	0.121251	O43572	A-kinase anchor protein 10 mitochondrial OS=Homo sapiens OX=9606 GN=AKAP10 PE=1 SV=2	unknown	NUCLEUS	0.760915	unknown
P82673	0.244812	0.39388	0.180129	0.0643551	0.02456	0.0162201	0.0262674	0.0175992	0.0209483	0.0112293	0.438111	0.270537	0.146869	0.0384103	0.017651	0.0117118	0.0152087	0.0125999	0.0155972	0.0333037	0.408129	0.266338	0.157637	0.0368446	0.0247959	0.0170254	0.0193827	0.0191644	0.0266731	0.0240101	P82673	28S ribosomal protein S35 mitochondrial OS=Homo sapiens OX=9606 GN=MRPS35 PE=1 SV=1	unknown	MITOCHONDRIA	0.927614	unknown
Q6KB66	0.113537	0.071821	0.0703071	0.101957	0.070869	0.0792652	0.137789	0.1575	0.142846	0.0541076	0.191718	0.071865	0.0806122	0.0799603	0.0923367	0.0713591	0.0803884	0.104859	0.116895	0.110006	0.0883656	0.0854435	0.111985	0.0761848	0.0767821	0.0824407	0.0955095	0.136411	0.134643	0.112235	Q6KB66	Keratin type II cytoskeletal 80 OS=Homo sapiens OX=9606 GN=KRT80 PE=1 SV=2	unknown	NUCLEUS	0.843644	unknown
P30044	0.0974302	0.144324	0.111934	0.130385	0.0579682	0.08643	0.0897763	0.0205676	0.0249122	0.236273	0.152266	0.117921	0.124751	0.0770618	0.0875156	0.0646576	0.05839	0.0206377	0.0234362	0.273363	0.0994531	0.163771	0.138235	0.0739761	0.0656846	0.0462791	0.0499838	0.049484	0.0421996	0.270934	P30044	Peroxiredoxin-5 mitochondrial OS=Homo sapiens OX=9606 GN=PRDX5 PE=1 SV=4	unknown	CYTOSOL	0.480263	unknown
O94887	0.102546	0.0906178	0.0783336	0.122129	0.0761973	0.0847427	0.107887	0.151148	0.145629	0.0407691	0.129061	0.0690307	0.100891	0.0828908	0.0845108	0.0648906	0.0627306	0.137521	0.168032	0.100441	0.195793	0.140344	0.17782	0.0829828	0.0508604	0.0351816	0.048566	0.0657744	0.0619503	0.140727	O94887	FERM ARHGEF and pleckstrin domain-containing protein 2 OS=Homo sapiens OX=9606 GN=FARP2 PE=1 SV=3	unknown	NUCLEUS-CHROMATIN	0.446222	unknown
Q96RP9	0.295639	0.439573	0.158595	0.0384063	0.0102717	0.00992777	0.0112562	0.0100464	0.00882468	0.0174596	0.449313	0.260492	0.158688	0.0392235	0.0134205	0.0123083	0.00777056	0.011122	0.0103805	0.0372809	0.290508	0.444761	0.145413	0.0320368	0.0165075	0.00983113	0.011005	0.0134506	0.0136951	0.0227926	Q96RP9	Elongation factor G mitochondrial OS=Homo sapiens OX=9606 GN=GFM1 PE=1 SV=2	unknown	MITOCHONDRIA	0.948614	unknown
O95865	0.0321594	0.0593941	0.0905089	0.140128	0.107223	0.107969	0.115132	0.0282794	0.0249963	0.29421	0.0613132	0.0720342	0.130895	0.110013	0.144419	0.126901	0.0999229	0.0323033	0.0408521	0.181347	0.0580725	0.0886474	0.14888	0.102265	0.0820348	0.0614115	0.0784994	0.0640958	0.0498887	0.266204	O95865	N(G)N(G)-dimethylarginine dimethylaminohydrolase 2 OS=Homo sapiens OX=9606 GN=DDAH2 PE=1 SV=1	unknown	CYTOSOL	0.822145	unknown
O60825	0.0309577	0.0458331	0.0570877	0.106089	0.0627301	0.080321	0.117856	0.15506	0.149689	0.194376	0.0395772	0.0348515	0.0628323	0.0665941	0.0882326	0.0622105	0.0616509	0.0917457	0.1358	0.356506	0.0337714	0.0557201	0.0929926	0.0538888	0.0571205	0.0550738	0.056178	0.0769417	0.0937736	0.424539	O60825	6-phosphofructo-2-kinase/fructose-26-bisphosphatase 2 OS=Homo sapiens OX=9606 GN=PFKFB2 PE=1 SV=2	unknown	CYTOSOL	0.529068	unknown
Q9H2U2	0.256075	0.335721	0.114694	0.0562806	0.0270262	0.0360137	0.0398655	0.0235988	0.0240233	0.0867023	0.340304	0.210621	0.135595	0.0435222	0.0337654	0.0265715	0.0256298	0.0237464	0.0308043	0.12944	0.237549	0.324274	0.128409	0.0377446	0.0288664	0.0235298	0.0259846	0.0329028	0.0302151	0.130525	Q9H2U2	Inorganic pyrophosphatase 2 mitochondrial OS=Homo sapiens OX=9606 GN=PPA2 PE=1 SV=2	unknown	MITOCHONDRIA	0.819199	unknown
P47813	0.0175422	0.0268964	0.0398464	0.0713106	0.0549589	0.0572671	0.110622	0.252928	0.296637	0.0719909	0.0284161	0.0309257	0.0518929	0.0628215	0.0802734	0.0725842	0.0971557	0.175267	0.274745	0.125919	0.0290173	0.0339734	0.0588801	0.0482974	0.0524955	0.0427777	0.0670722	0.185493	0.399256	0.0827373	P47813	Eukaryotic translation initiation factor 1A X-chromosomal OS=Homo sapiens OX=9606 GN=EIF1AX PE=1 SV=2	unknown	NUCLEUS	0.811044	unknown
P42704	0.355021	0.424243	0.131174	0.0300808	0.00901825	0.00806641	0.00975805	0.0116709	0.0113806	0.00958751	0.47654	0.269192	0.155502	0.0330535	0.00944676	0.00719512	0.0074557	0.0079794	0.0103955	0.0232399	0.3632	0.412659	0.148269	0.0192738	0.00877861	0.00688587	0.00670776	0.00954197	0.0124936	0.0121902	P42704	Leucine-rich PPR motif-containing protein mitochondrial OS=Homo sapiens OX=9606 GN=LRPPRC PE=1 SV=3	unknown	MITOCHONDRIA	0.953665	unknown
O94760	0.0448007	0.0670338	0.103188	0.138931	0.0818558	0.114922	0.13291	0.0349193	0.0323203	0.249119	0.0736591	0.0676747	0.115402	0.101709	0.134906	0.110895	0.0994434	0.0340344	0.0340836	0.228193	0.060973	0.130594	0.166161	0.106174	0.0807036	0.0572574	0.067379	0.0633176	0.0432794	0.224161	O94760	N(G)N(G)-dimethylarginine dimethylaminohydrolase 1 OS=Homo sapiens OX=9606 GN=DDAH1 PE=1 SV=3	unknown	CYTOSOL	0.782688	unknown
Q96BJ3	0.0605128	0.0731966	0.0979145	0.188444	0.103487	0.121197	0.182564	0.0562393	0.0317949	0.0846496	0.0978009	0.0697853	0.123158	0.132378	0.128245	0.090455	0.0781454	0.0362988	0.0337478	0.209986	0.117683	0.162487	0.185497	0.11691	0.0771923	0.0531954	0.0558832	0.0494827	0.0304554	0.151213	Q96BJ3	Axin interactor dorsalization-associated protein OS=Homo sapiens OX=9606 GN=AIDA PE=1 SV=1	unknown	PM	0.356244	unknown
P09543	0.105987	0.103195	0.0922142	0.151345	0.10949	0.0945965	0.153159	0.106839	0.0556599	0.0275144	0.179296	0.089824	0.137599	0.138788	0.111348	0.0699006	0.0748044	0.0684177	0.072235	0.057788	0.184812	0.20462	0.211909	0.129265	0.0854299	0.052215	0.0555062	0.0407867	0.0188184	0.0166377	P09543	2'3'-cyclic-nucleotide 3'-phosphodiesterase OS=Homo sapiens OX=9606 GN=CNP PE=1 SV=2	unknown	PM	0.586267	unknown
P13807	0.0172827	0.0264543	0.0374239	0.0623024	0.0483935	0.0619489	0.0973121	0.238341	0.330845	0.0796962	0.0309814	0.0315061	0.0618846	0.0556101	0.0741543	0.0585464	0.0588032	0.106911	0.198136	0.323468	0.020872	0.0262098	0.0464284	0.0307152	0.034683	0.0301408	0.065688	0.312716	0.368877	0.0636698	P13807	Glycogen [starch] synthase muscle OS=Homo sapiens OX=9606 GN=GYS1 PE=1 SV=2	unknown	NUCLEUS	0.548685	unknown
Q9NQZ5	0.146857	0.184363	0.120444	0.0919176	0.0517697	0.0575806	0.0697306	0.0655045	0.0364501	0.175383	0.131757	0.109577	0.10708	0.064483	0.0713866	0.0624266	0.0584606	0.0539072	0.0690364	0.271886	0.12078	0.12153	0.11928	0.0675169	0.0675169	0.0367592	0.0885221	0.0787697	0.0525131	0.246812	Q9NQZ5	StAR-related lipid transfer protein 7 mitochondrial OS=Homo sapiens OX=9606 GN=STARD7 PE=1 SV=2	unknown	NUCLEUS-CHROMATIN	0.451011	unknown
Q9H2K0	0.270699	0.373575	0.111552	0.0493307	0.0215667	0.0242935	0.0426376	0.046356	0.0409023	0.0190878	0.498067	0.299855	0.146424	0.0191688	0.000885954	0.00515464	0.00596005	0.00692655	0.00789304	0.00966495	0.354595	0.402367	0.142186	0.0225374	0.0142708	0.00870171	0.0107901	0.0127045	0.015489	0.0163592	Q9H2K0	Translation initiation factor IF-3 mitochondrial OS=Homo sapiens OX=9606 GN=MTIF3 PE=1 SV=4	unknown	MITOCHONDRIA	0.934819	unknown
Q9BWD1	0.0311927	0.048524	0.066017	0.0995829	0.075276	0.0919241	0.0964546	0.0531804	0.0571177	0.380731	0.0267313	0.0283465	0.0451847	0.0725621	0.0526953	0.143994	0.163578	0.0605694	0.0525742	0.353765	0.05108	0.080949	0.130807	0.0765404	0.080949	0.0663598	0.0723442	0.0834278	0.0771601	0.280382	Q9BWD1	Acetyl-CoA acetyltransferase cytosolic OS=Homo sapiens OX=9606 GN=ACAT2 PE=1 SV=2	unknown	CYTOSOL	0.544725	unknown
P60709	0.13366	0.0981575	0.0898562	0.123605	0.0851805	0.0785875	0.0715194	0.0280317	0.0256619	0.26574	0.149026	0.0579003	0.0945385	0.0919056	0.079445	0.0650632	0.0453165	0.0196855	0.0252968	0.371822	0.125007	0.114946	0.145218	0.0817947	0.0620034	0.0447596	0.0470609	0.0433822	0.0397121	0.296116	P60709	Actin cytoplasmic 1 OS=Homo sapiens OX=9606 GN=ACTB PE=1 SV=1	unknown	CYTOSOL	0.600396	unknown
Q8NE86	0.265315	0.445067	0.190671	0.0332624	0.00800762	0.0110875	0.0123194	0.00851159	0.0108075	0.0149513	0.392978	0.249215	0.181242	0.0472163	0.0240246	0.0110833	0.0177462	0.0228074	0.0231277	0.0305593	0.329608	0.303924	0.172652	0.0416171	0.0292509	0.0237812	0.0370987	0.0268728	0.0230678	0.0121284	Q8NE86	Calcium uniporter protein mitochondrial OS=Homo sapiens OX=9606 GN=MCU PE=1 SV=1	unknown	MITOCHONDRIA	0.915824	unknown
P19174-2	0.0399656	0.0505869	0.0650676	0.128445	0.0744131	0.0946989	0.138173	0.113996	0.128891	0.165763	0.0410868	0.0402884	0.0798011	0.0626226	0.0890633	0.0791167	0.0640827	0.095086	0.1325	0.316353	0.0382831	0.0647287	0.108868	0.062399	0.0647707	0.0565642	0.0582013	0.0689894	0.0802183	0.396978	P19174-2	Isoform 2 of 1-phosphatidylinositol 45-bisphosphate phosphodiesterase gamma-1 OS=Homo sapiens OX=9606 GN=PLCG1	unknown	CYTOSOL	0.670628	unknown
Q8WWC4	0.327378	0.384273	0.113298	0.0360642	0.0183615	0.0186908	0.02676	0.0450391	0.0208316	0.00930424	0.461666	0.27862	0.13796	0.0271487	0.0114966	0.0132973	0.0122585	0.0101808	0.01212	0.0352517	0.374864	0.438128	0.140301	0.018949	0.00708318	0.00414699	0.00384429	0.00399564	0.00411672	0.00457077	Q8WWC4	m-AAA protease-interacting protein 1 mitochondrial OS=Homo sapiens OX=9606 GN=MAIP1 PE=1 SV=1	unknown	MITOCHONDRIA	0.944832	unknown
P52815	0.404769	0.396849	0.0996451	0.0345566	0.00904488	0.00833081	0.00880686	0.0124205	0.0120959	0.0134808	0.450898	0.299943	0.13437	0.0268544	0.0141274	0.00995062	0.00827989	0.0121619	0.0137343	0.0296799	0.349131	0.398016	0.137066	0.03037	0.0149778	0.00972725	0.00712963	0.0113024	0.0114682	0.0308122	P52815	39S ribosomal protein L12 mitochondrial OS=Homo sapiens OX=9606 GN=MRPL12 PE=1 SV=2	unknown	MITOCHONDRIA	0.950423	unknown
Q9NVV4	0.311171	0.398527	0.122181	0.0546618	0.0200943	0.0149254	0.0178329	0.0235834	0.0215158	0.0155069	0.43058	0.261442	0.131744	0.0322807	0.0121452	0.0246101	0.0236512	0.0239709	0.0220532	0.0375224	0.282345	0.321848	0.105212	0.0413472	0.0330001	0.0253324	0.0332913	0.0438707	0.0447442	0.069009	Q9NVV4	Poly(A) RNA polymerase mitochondrial OS=Homo sapiens OX=9606 GN=MTPAP PE=1 SV=1	unknown	MITOCHONDRIA	0.942124	unknown
P42167	0.315674	0.117305	0.113502	0.183358	0.104173	0.0631629	0.0606656	0.0200208	0.0147174	0.00742185	0.252137	0.0784072	0.193651	0.202961	0.121279	0.0716096	0.0398654	0.0117106	0.00984857	0.0185306	0.31427	0.176605	0.165305	0.106017	0.0885699	0.0502405	0.0409254	0.0203863	0.0128274	0.024853	P42167	Lamina-associated polypeptide 2 isoforms beta/gamma OS=Homo sapiens OX=9606 GN=TMPO PE=1 SV=2	unknown	NUCLEUS-CHROMATIN	0.246294	unknown
C9J9T0	0.0287226	0.0453515	0.0687831	0.10582	0.0816327	0.0559335	0.11867	0.021164	0.026455	0.447468	0.0528698	0.06953	0.119607	0.0990948	0.150327	0.133667	0.114696	0.0463213	0.0476695	0.166217	0.0615619	0.086687	0.158147	0.0970742	0.0978899	0.0851099	0.0908201	0.0885904	0.0718947	0.162225	C9J9T0	Ribulose-5-phosphate-3-epimerase isoform CRA_a OS=Homo sapiens OX=9606 GN=RPE PE=1 SV=1	unknown	CYTOSOL	0.732939	unknown
Q9H6U8	0.0922681	0.143443	0.128355	0.262342	0.208664	0.0811431	0.055486	0.0125156	0.00472813	0.0110555	0.0756381	0.0805146	0.205437	0.264266	0.151276	0.0890226	0.0601785	0.0214775	0.0219963	0.030193	0.0970494	0.137576	0.254533	0.194099	0.135798	0.0760754	0.0508354	0.0298614	0.0103093	0.0138642	Q9H6U8	Alpha-12-mannosyltransferase ALG9 OS=Homo sapiens OX=9606 GN=ALG9 PE=1 SV=2	unknown	ER	0.813084	unknown
P54136	0.0289553	0.0562535	0.0748165	0.127329	0.0769142	0.0811097	0.0823399	0.0807333	0.143978	0.247571	0.0314858	0.04523	0.0955913	0.0888744	0.0905244	0.0637859	0.0437766	0.0429439	0.109677	0.388111	0.0323476	0.0530372	0.102375	0.0671757	0.0626113	0.044799	0.0434003	0.0811144	0.256671	0.256468	P54136	Arginine--tRNA ligase cytoplasmic OS=Homo sapiens OX=9606 GN=RARS PE=1 SV=2	unknown	CYTOSOL	0.329716	unknown
Q07021	0.348023	0.429853	0.116598	0.0432929	0.0111176	0.00817847	0.00920077	0.0104148	0.00991274	0.0134087	0.449636	0.309894	0.144298	0.0339965	0.0105858	0.00862313	0.00705014	0.00721311	0.00773744	0.0209662	0.306899	0.43749	0.144965	0.035018	0.014374	0.00846916	0.00831697	0.0120836	0.0141761	0.0182091	Q07021	Complement component 1 Q subcomponent-binding protein mitochondrial OS=Homo sapiens OX=9606 GN=C1QBP PE=1 SV=1	unknown	MITOCHONDRIA	0.951527	unknown
Q9P015	0.362727	0.43891	0.116044	0.0154799	0.0052521	0.0100066	0.00829279	0.013379	0.017636	0.0122733	0.483209	0.284274	0.14837	0.0255279	0.00822916	0.00721364	0.00661834	0.00973492	0.0143573	0.0124663	0.376816	0.385241	0.1493	0.013333	0.00849796	0.00698396	0.00857122	0.0136993	0.0223194	0.0152377	Q9P015	39S ribosomal protein L15 mitochondrial OS=Homo sapiens OX=9606 GN=MRPL15 PE=1 SV=1	unknown	MITOCHONDRIA	0.950337	unknown
Q6N069	0.0285292	0.0425824	0.0500493	0.112461	0.0815018	0.0955551	0.235454	0.184242	0.119118	0.0505072	0.057749	0.054352	0.0980644	0.104346	0.105051	0.0850532	0.11569	0.12492	0.125176	0.129599	0.0409866	0.0502934	0.0888502	0.0767467	0.0921053	0.0993031	0.158674	0.167522	0.127682	0.0978361	Q6N069	N-alpha-acetyltransferase 16 NatA auxiliary subunit OS=Homo sapiens OX=9606 GN=NAA16 PE=1 SV=2	unknown	RIBOSOME	0.641594	unknown
C9JJ19	0.347901	0.428125	0.120571	0.0266115	0.00889652	0.00835024	0.0182613	0.017793	0.0156079	0.007882	0.510133	0.286192	0.140854	0.0178925	0.00369279	0.0039126	0.00461599	0.0085286	0.0112982	0.0128808	0.386597	0.399347	0.146461	0.0151651	0.0052787	0.00671021	0.0064418	0.00912588	0.0161492	0.00872327	C9JJ19	28S ribosomal protein S34 mitochondrial OS=Homo sapiens OX=9606 GN=MRPS34 PE=1 SV=2	unknown	MITOCHONDRIA	0.943783	unknown
Q8IYB8	0.284612	0.408395	0.124162	0.0514604	0.0211152	0.0165634	0.013276	0.028575	0.026552	0.0252876	0.371311	0.233161	0.147575	0.0602683	0.0240798	0.0166495	0.0194702	0.0386653	0.0484348	0.0403853	0.314067	0.40119	0.0977476	0.0259244	0.0127497	0.0233744	0.0322992	0.0220994	0.0276243	0.0429239	Q8IYB8	ATP-dependent RNA helicase SUPV3L1 mitochondrial OS=Homo sapiens OX=9606 GN=SUPV3L1 PE=1 SV=1	unknown	MITOCHONDRIA	0.937767	unknown
P36639	0.0497964	0.0604447	0.0654557	0.123708	0.0679612	0.105543	0.100219	0.0322581	0.0444723	0.350141	0.0877105	0.0850425	0.14007	0.0903785	0.145906	0.131232	0.100884	0.0528598	0.0490245	0.116892	0.0681551	0.100372	0.165981	0.096602	0.0920486	0.0794653	0.0875441	0.0916079	0.0674207	0.150803	P36639	78-dihydro-8-oxoguanine triphosphatase OS=Homo sapiens OX=9606 GN=NUDT1 PE=1 SV=3	unknown	CYTOSOL	0.824392	unknown
Q92667	0.180117	0.274273	0.159481	0.127234	0.0608132	0.0390817	0.0466176	0.0363214	0.0329916	0.0430687	0.224128	0.168227	0.195796	0.132441	0.0724319	0.0419494	0.0307692	0.0314859	0.0297659	0.0730053	0.207831	0.263769	0.198621	0.0867435	0.0638781	0.0386081	0.0325288	0.0359314	0.0327103	0.0393794	Q92667	A-kinase anchor protein 1 mitochondrial OS=Homo sapiens OX=9606 GN=AKAP1 PE=1 SV=1	unknown	NUCLEUS-CHROMATIN	0.280933	unknown
P82664	0.278442	0.412878	0.142049	0.0628671	0.013052	0.0100065	0.0143572	0.0191429	0.0208832	0.0263215	0.421736	0.276561	0.112733	0.0263585	0.0328467	0.0251419	0.0223033	0.0105434	0.0145985	0.0571776	0.257754	0.37931	0.111732	0.0408399	0.0333269	0.0331343	0.02042	0.0529763	0.0387209	0.0317858	P82664	28S ribosomal protein S10 mitochondrial OS=Homo sapiens OX=9606 GN=MRPS10 PE=1 SV=2	unknown	MITOCHONDRIA	0.924977	unknown
Q9BW92	0.323228	0.367907	0.132305	0.0493365	0.0196217	0.0155985	0.0221626	0.0274562	0.0201863	0.0221979	0.332812	0.205499	0.139171	0.0738858	0.0349231	0.0341413	0.0220224	0.0358353	0.0463904	0.0753193	0.27412	0.394521	0.139349	0.0345018	0.0223433	0.0180799	0.0204484	0.0186326	0.0299226	0.0480815	Q9BW92	Threonine--tRNA ligase mitochondrial OS=Homo sapiens OX=9606 GN=TARS2 PE=1 SV=1	unknown	MITOCHONDRIA	0.913388	unknown
P55084	0.296912	0.461552	0.159415	0.0260025	0.00605815	0.00713546	0.00980776	0.012529	0.0114797	0.00910821	0.448849	0.281046	0.158144	0.0305947	0.0111767	0.00825812	0.0102067	0.0101054	0.0122649	0.0293547	0.342306	0.419232	0.153276	0.0219952	0.0105346	0.00850404	0.00930814	0.0111925	0.00997417	0.0136779	P55084	Trifunctional enzyme subunit beta mitochondrial OS=Homo sapiens OX=9606 GN=HADHB PE=1 SV=3	unknown	MITOCHONDRIA	0.949783	unknown
Q86Y56	0.0305749	0.0377642	0.0503131	0.0783196	0.063343	0.0813454	0.106525	0.180119	0.193231	0.178465	0.0405934	0.0360945	0.0660943	0.06106	0.0791896	0.0685033	0.0773056	0.115665	0.163331	0.292163	0.0423084	0.0553461	0.0927576	0.0588595	0.0651397	0.0571089	0.0637808	0.0930637	0.134846	0.33679	Q86Y56	Dynein assembly factor 5 axonemal OS=Homo sapiens OX=9606 GN=DNAAF5 PE=1 SV=4	unknown	NUCLEUS	0.501418	unknown
P14868	0.0281196	0.0522527	0.0760764	0.14082	0.0704437	0.0748745	0.0855328	0.0929782	0.188118	0.190784	0.0317929	0.0466793	0.0963495	0.0961816	0.0993404	0.067558	0.0499221	0.0505937	0.135452	0.326131	0.0304949	0.0531868	0.0954521	0.0673688	0.0568126	0.0394039	0.0400364	0.0905377	0.309627	0.21708	P14868	Aspartate--tRNA ligase cytoplasmic OS=Homo sapiens OX=9606 GN=DARS PE=1 SV=2	unknown	PROTEASOME	0.402372	unknown
Q6L8Q7	0.129003	0.180854	0.0946208	0.0915015	0.0500485	0.0704284	0.0866491	0.0301539	0.0277277	0.239013	0.168238	0.112571	0.102151	0.0478966	0.0593056	0.0562326	0.0388542	0.0211579	0.0243015	0.369291	0.134529	0.150289	0.108591	0.0483672	0.0523195	0.0349291	0.0470332	0.0465886	0.0433773	0.333976	Q6L8Q7	2'5'-phosphodiesterase 12 OS=Homo sapiens OX=9606 GN=PDE12 PE=1 SV=2	unknown	CYTOSOL	0.361804	unknown
P41252	0.0257368	0.0477306	0.0815665	0.139623	0.0711395	0.0801708	0.090069	0.0830806	0.17115	0.209734	0.0291149	0.0430931	0.0907894	0.0823869	0.0893338	0.0645417	0.0487769	0.0477199	0.123214	0.38103	0.0288598	0.0478282	0.0895783	0.0576499	0.0542807	0.0394794	0.0390329	0.0856971	0.293563	0.26403	P41252	Isoleucine--tRNA ligase cytoplasmic OS=Homo sapiens OX=9606 GN=IARS PE=1 SV=2	unknown	PROTEASOME	0.353897	unknown
Q9NWU5	0.351974	0.426037	0.0838317	0.0341906	0.0121611	0.0116627	0.0149522	0.0265152	0.0257177	0.0129585	0.477894	0.267338	0.163029	0.025702	0.00819211	0.00406479	0.00600338	0.0150084	0.0162591	0.0165093	0.27207	0.362727	0.133855	0.0385416	0.0242742	0.0193203	0.022689	0.0300208	0.0510255	0.0454771	Q9NWU5	39S ribosomal protein L22 mitochondrial OS=Homo sapiens OX=9606 GN=MRPL22 PE=1 SV=1	unknown	MITOCHONDRIA	0.941228	unknown
P12532	0.238764	0.29904	0.116734	0.0636621	0.0283216	0.0355252	0.0502401	0.0786849	0.0716045	0.017424	0.393082	0.274283	0.14663	0.0430915	0.0244317	0.0172366	0.0189761	0.03475	0.0338407	0.0136786	0.282814	0.31619	0.137894	0.0511369	0.0331804	0.0296672	0.0438177	0.0456719	0.0272275	0.0323997	P12532	Creatine kinase U-type mitochondrial OS=Homo sapiens OX=9606 GN=CKMT1A PE=1 SV=1	unknown	MITOCHONDRIA	0.848822	unknown
O00469-2	0.0582915	0.142318	0.211053	0.319188	0.122743	0.0655389	0.0483139	0.0100154	0.00722341	0.0153146	0.0639838	0.102684	0.253043	0.266572	0.165553	0.0600029	0.0368687	0.00886213	0.00958753	0.0328441	0.0642959	0.150708	0.280907	0.204745	0.125687	0.0662616	0.0438452	0.0173715	0.0142487	0.0319301	O00469-2	Isoform 2 of Procollagen-lysine2-oxoglutarate 5-dioxygenase 2 OS=Homo sapiens OX=9606 GN=PLOD2	unknown	ER	0.653194	unknown
Q9GZT3	0.307439	0.455038	0.130604	0.0359479	0.00804578	0.00940108	0.0133809	0.0140048	0.0156613	0.0104767	0.452276	0.302978	0.133912	0.0272036	0.010615	0.00915381	0.0068761	0.0140101	0.0163737	0.0266019	0.325585	0.45107	0.132538	0.0316016	0.0125778	0.00680547	0.00783865	0.00914134	0.0130045	0.00983761	Q9GZT3	SRA stem-loop-interacting RNA-binding protein mitochondrial OS=Homo sapiens OX=9606 GN=SLIRP PE=1 SV=1	unknown	MITOCHONDRIA	0.946918	unknown
P42166	0.301652	0.114452	0.101598	0.141866	0.0860507	0.0653462	0.0904508	0.0467583	0.026413	0.0254124	0.303228	0.0704158	0.130965	0.139027	0.101931	0.0679634	0.0572516	0.0353488	0.029852	0.0640169	0.343587	0.165499	0.145906	0.0963334	0.0765547	0.0551974	0.0448504	0.0269288	0.02474	0.0204022	P42166	Lamina-associated polypeptide 2 isoform alpha OS=Homo sapiens OX=9606 GN=TMPO PE=1 SV=2	unknown	NUCLEUS-CHROMATIN	0.455956	unknown
A2IDC6	0.362692	0.402732	0.10946	0.044437	0.0133245	0.00732845	0.00819454	0.0169221	0.0213191	0.0135909	0.476481	0.281324	0.151034	0.0218538	0.00582767	0.00714583	0.0108228	0.0133204	0.0148467	0.0173442	0.339279	0.250819	0.134692	0.0356753	0.0349472	0.0254823	0.033127	0.0462323	0.0455042	0.054241	A2IDC6	39S ribosomal protein L28 mitochondrial (Fragment) OS=Homo sapiens OX=9606 GN=MRPL28 PE=1 SV=1	unknown	MITOCHONDRIA	0.926989	unknown
P07954	0.201568	0.248031	0.110317	0.0846237	0.0393783	0.0530467	0.0591886	0.021696	0.0242228	0.157928	0.294151	0.18874	0.125415	0.0470094	0.0514766	0.0429072	0.0379061	0.0231152	0.026994	0.162286	0.196369	0.241336	0.134545	0.0492723	0.0397001	0.032543	0.0364034	0.0374658	0.0376332	0.194732	P07954	Fumarate hydratase mitochondrial OS=Homo sapiens OX=9606 GN=FH PE=1 SV=3	unknown	NUCLEUS-CHROMATIN	0.44722	unknown
P10809	0.33434	0.43999	0.14007	0.0373867	0.00867494	0.00744021	0.00819617	0.00638187	0.00581954	0.0117014	0.460936	0.298391	0.146136	0.0323081	0.0104042	0.00712196	0.00703438	0.00607237	0.00696626	0.0246301	0.335978	0.428768	0.14698	0.0275084	0.0109595	0.00684342	0.00633347	0.00787591	0.00880389	0.0199485	P10809	60 kDa heat shock protein mitochondrial OS=Homo sapiens OX=9606 GN=HSPD1 PE=1 SV=2	unknown	MITOCHONDRIA	0.952373	unknown
Q5VZE5	0.0343863	0.0471559	0.0664509	0.132233	0.0927112	0.0972315	0.183857	0.156735	0.138812	0.0504274	0.0591774	0.0464622	0.098688	0.102707	0.102505	0.087439	0.0932278	0.126469	0.141232	0.142092	0.0434644	0.053237	0.0972406	0.0941121	0.109519	0.116847	0.155163	0.157987	0.107089	0.0653409	Q5VZE5	N-alpha-acetyltransferase 35 NatC auxiliary subunit OS=Homo sapiens OX=9606 GN=NAA35 PE=1 SV=1	unknown	RIBOSOME	0.71559	unknown
Q6P1L8	0.345485	0.426335	0.1347	0.0325972	0.0096052	0.00665557	0.00998336	0.0160339	0.0117229	0.00688247	0.496794	0.285172	0.149021	0.0280504	0.00335907	0.00488592	0.00754701	0.00506042	0.007896	0.0122148	0.356151	0.355821	0.123926	0.0191672	0.0173732	0.0156265	0.0235577	0.0311113	0.0336607	0.0236049	Q6P1L8	39S ribosomal protein L14 mitochondrial OS=Homo sapiens OX=9606 GN=MRPL14 PE=1 SV=1	unknown	MITOCHONDRIA	0.953936	unknown
P68032	0.136358	0.102273	0.0912035	0.136426	0.0957516	0.0899048	0.0861663	0.03589	0.0338324	0.192195	0.16965	0.0684144	0.111646	0.0995955	0.0956305	0.0655368	0.0437665	0.0220129	0.0272077	0.296541	0.116088	0.115027	0.15654	0.0884222	0.0666219	0.0470182	0.0457854	0.0458918	0.0400441	0.278562	P68032	Actin alpha cardiac muscle 1 OS=Homo sapiens OX=9606 GN=ACTC1 PE=1 SV=1	unknown	CYTOSOL	0.445987	unknown
Q14CX7	0.0265307	0.0435503	0.0616216	0.128256	0.101714	0.107175	0.237479	0.1756	0.0984021	0.0196715	0.0537182	0.0596792	0.0980115	0.120797	0.122086	0.103823	0.138427	0.136804	0.118265	0.0483901	0.0396844	0.0538568	0.0795232	0.0921249	0.116793	0.131019	0.196279	0.169396	0.0900276	0.0312954	Q14CX7	N-alpha-acetyltransferase 25 NatB auxiliary subunit OS=Homo sapiens OX=9606 GN=NAA25 PE=1 SV=1	unknown	RIBOSOME	0.376283	unknown
P52209	0.0353058	0.0368115	0.0472953	0.0929276	0.0559139	0.0749264	0.123109	0.141875	0.139223	0.252613	0.0494284	0.0308433	0.0667733	0.0599971	0.0746819	0.0623877	0.0755985	0.101823	0.127004	0.351463	0.0383086	0.0624936	0.108926	0.0657738	0.0674394	0.0499337	0.0603182	0.0693939	0.0774499	0.399963	P52209	6-phosphogluconate dehydrogenase decarboxylating OS=Homo sapiens OX=9606 GN=PGD PE=1 SV=3	unknown	CYTOSOL	0.649332	unknown
Q9BUB7	0.208682	0.262029	0.145921	0.0873431	0.0570084	0.0460251	0.0580544	0.0381799	0.0381799	0.0585774	0.411192	0.26618	0.15588	0.042498	0.0081103	0.0100568	0.00632603	0.00340633	0.00665045	0.0896999	0.24463	0.470043	0.141307	0.0483835	0.012435	0.0115306	0.0131133	0.0278092	0.0153742	0.0153742	Q9BUB7	Transmembrane protein 70 mitochondrial OS=Homo sapiens OX=9606 GN=TMEM70 PE=1 SV=2	unknown	MITOCHONDRIA	0.690362	unknown
Q9H9P8	0.266526	0.355659	0.129218	0.0409591	0.0247067	0.030027	0.0297354	0.0365863	0.03061	0.0559726	0.427195	0.253358	0.160483	0.0424918	0.016845	0.0141134	0.0106988	0.0160103	0.019349	0.0394567	0.318565	0.354864	0.153586	0.0346434	0.0217483	0.0118557	0.0150121	0.0248662	0.0282536	0.0366065	Q9H9P8	L-2-hydroxyglutarate dehydrogenase mitochondrial OS=Homo sapiens OX=9606 GN=L2HGDH PE=1 SV=3	unknown	MITOCHONDRIA	0.953709	unknown
P50416	0.13391	0.233054	0.187312	0.195362	0.0976058	0.0575021	0.0493909	0.0173381	0.0142021	0.0143228	0.19696	0.165088	0.212019	0.190827	0.113468	0.049015	0.0293616	0.0113895	0.0110816	0.0207899	0.17937	0.238911	0.222231	0.115147	0.0840883	0.0595406	0.0455213	0.0224697	0.017261	0.0154601	P50416	Carnitine O-palmitoyltransferase 1 liver isoform OS=Homo sapiens OX=9606 GN=CPT1A PE=1 SV=2	unknown	ER	0.189108	unknown
Q9UGQ3	0.0470369	0.178833	0.225172	0.226452	0.114914	0.0743975	0.0475026	0.0305041	0.0137385	0.0414484	0.06364	0.173081	0.337242	0.262477	0.0823812	0.0353778	0.0279615	0.00521147	0.00190419	0.0107236	0.0783887	0.194339	0.317774	0.169298	0.0843767	0.0398748	0.0451824	0.0307567	0.0132009	0.02681	Q9UGQ3	Solute carrier family 2 facilitated glucose transporter member 6 OS=Homo sapiens OX=9606 GN=SLC2A6 PE=1 SV=2	unknown	LYSOSOME	0.292804	unknown
P35527	0.155531	0.0959132	0.0632667	0.0596393	0.0604398	0.0580239	0.242718	0.0849734	0.0481369	0.131358	0.0897597	0.404128	0.0769445	0.0555845	0.0805387	0.0534575	0.034667	0.0283025	0.114005	0.062613	0.0929699	0.0550486	0.285454	0.0525236	0.114098	0.150432	0.0847173	0.0273665	0.0702821	0.0671073	P35527	Keratin type I cytoskeletal 9 OS=Homo sapiens OX=9606 GN=KRT9 PE=1 SV=3	unknown	NUCLEUS-CHROMATIN	0.277093	unknown
P08779	0.74051	0.0315006	0.00254588	0.021621	0.0237869	0.0160733	0.0298666	0.0538055	0.0490177	0.0312726	0.176096	0.204823	0.0750302	0.0420191	0.0700868	0.125288	0.0610788	0.0446556	0.130012	0.0709107	0.130196	0.073778	0.168799	0.0433988	0.0504797	0.0666971	0.101873	0.0511649	0.0856556	0.227958	P08779	Keratin type I cytoskeletal 16 OS=Homo sapiens OX=9606 GN=KRT16 PE=1 SV=4	unknown	NUCLEUS-CHROMATIN	0.298981	unknown
Q8N983-4	0.317568	0.428509	0.140239	0.0305059	0.00471853	0.011522	0.0132777	0.0186547	0.02469	0.0103149	0.447984	0.33241	0.139735	0.0238535	0.00754078	0.0104648	0.0047707	0.00769468	0.0163127	0.00923361	0.371657	0.352845	0.148044	0.0222617	0.0126245	0.0119132	0.0103841	0.0163229	0.0318634	0.0220839	Q8N983-4	Isoform 4 of 39S ribosomal protein L43 mitochondrial OS=Homo sapiens OX=9606 GN=MRPL43	unknown	MITOCHONDRIA	0.953278	unknown
Q9UJZ1	0.379	0.455538	0.112711	0.02589	0.00735347	0.00512406	0.00580726	0.00226537	0.00300252	0.00330816	0.46794	0.31114	0.155361	0.0264509	0.00775803	0.00550084	0.0057182	0.00424685	0.00652076	0.00936314	0.357296	0.414203	0.157939	0.029543	0.00977723	0.00554287	0.00611991	0.00595736	0.00567291	0.00794857	Q9UJZ1	Stomatin-like protein 2 mitochondrial OS=Homo sapiens OX=9606 GN=STOML2 PE=1 SV=1	unknown	MITOCHONDRIA	0.938825	unknown
Q9BZE1	0.33357	0.392487	0.131755	0.0417326	0.0110469	0.0119513	0.0145677	0.0186053	0.0230951	0.0211893	0.341055	0.191039	0.129482	0.0405056	0.0271604	0.0264555	0.0191485	0.0155773	0.0242	0.185377	0.328452	0.375908	0.14938	0.0328122	0.0166263	0.0136167	0.0135066	0.0189019	0.0238567	0.0269397	Q9BZE1	39S ribosomal protein L37 mitochondrial OS=Homo sapiens OX=9606 GN=MRPL37 PE=1 SV=2	unknown	MITOCHONDRIA	0.901315	unknown
O95881	0.0586431	0.125898	0.188924	0.32324	0.142827	0.0604674	0.0509993	0.0110274	0.0044232	0.0335511	0.0623296	0.10654	0.236954	0.259701	0.192046	0.0684009	0.0489506	0.00710164	0.00435927	0.0136168	0.0702587	0.140239	0.282363	0.209246	0.131076	0.0726073	0.0486109	0.0201181	0.0112334	0.0142464	O95881	Thioredoxin domain-containing protein 12 OS=Homo sapiens OX=9606 GN=TXNDC12 PE=1 SV=1	ER	ER	1	ER
Q53EP0	0.060332	0.127387	0.197061	0.290891	0.128696	0.0766347	0.0668174	0.0155887	0.0146368	0.0219551	0.0754226	0.0922095	0.232218	0.258699	0.153919	0.0720731	0.045356	0.0211215	0.0191906	0.0297908	0.0748593	0.140947	0.275891	0.203002	0.137523	0.0837242	0.0443715	0.0151032	0.0115385	0.0130394	Q53EP0	Fibronectin type III domain-containing protein 3B OS=Homo sapiens OX=9606 GN=FNDC3B PE=1 SV=2	ER	ER	1	ER
O15066	0.0370804	0.0456113	0.06332	0.102987	0.0679088	0.0774253	0.135633	0.19652	0.183585	0.0899292	0.0500918	0.0368896	0.0639446	0.0668912	0.083614	0.0751569	0.0819302	0.162138	0.180583	0.19876	0.0449715	0.0510414	0.0914416	0.0673287	0.0714459	0.0690694	0.0849177	0.137458	0.161359	0.220968	O15066	Kinesin-like protein KIF3B OS=Homo sapiens OX=9606 GN=KIF3B PE=1 SV=1	unknown	NUCLEUS	0.932705	NUCLEUS
O60942	0.0228771	0.0445909	0.062815	0.0934471	0.0682435	0.0651415	0.173323	0.231485	0.210934	0.0271423	0.0625822	0.0426963	0.0868548	0.0747185	0.0701857	0.0678462	0.0713555	0.191402	0.217283	0.115075	0.0711107	0.0523793	0.0858317	0.0682741	0.0771751	0.0723823	0.109796	0.162958	0.187949	0.112144	O60942	mRNA-capping enzyme OS=Homo sapiens OX=9606 GN=RNGTT PE=1 SV=1	unknown	NUCLEUS	0.947893	NUCLEUS
Q00577	0.017616	0.0292866	0.0603347	0.112522	0.0661333	0.0911627	0.213153	0.216163	0.171682	0.0219466	0.0407973	0.03673	0.0774652	0.0929893	0.114506	0.0839543	0.139158	0.191288	0.16617	0.0569424	0.0327911	0.0462721	0.0846172	0.0825882	0.090326	0.0980294	0.150767	0.252614	0.139057	0.0229383	Q00577	Transcriptional activator protein Pur-alpha OS=Homo sapiens OX=9606 GN=PURA PE=1 SV=2	unknown	RIBOSOME	0.847132	RIBOSOME
Q9UGI8	0.042964	0.0615998	0.0776212	0.134081	0.0863127	0.0987629	0.135591	0.0666312	0.0789333	0.217503	0.0507543	0.0475832	0.0732407	0.0681796	0.0960793	0.0839393	0.0649604	0.0560076	0.0948781	0.364377	0.0507008	0.0747016	0.126081	0.0751123	0.071407	0.0639042	0.0559319	0.067643	0.0670394	0.347478	Q9UGI8	Testin OS=Homo sapiens OX=9606 GN=TES PE=1 SV=1	unknown	CYTOSOL	0.881341	CYTOSOL
Q13185	0.0780107	0.0485037	0.0577002	0.110258	0.07606	0.0862517	0.111333	0.0503749	0.0467255	0.334782	0.0628195	0.0485072	0.0905573	0.0728652	0.10489	0.0949073	0.0806472	0.0470259	0.0545576	0.343223	0.106567	0.0661418	0.112764	0.0657922	0.0710367	0.0573526	0.0661177	0.0676609	0.0601497	0.326417	Q13185	Chromobox protein homolog 3 OS=Homo sapiens OX=9606 GN=CBX3 PE=1 SV=4	unknown	CYTOSOL	0.935708	CYTOSOL
Q15750	0.0355545	0.0515502	0.0650671	0.0881311	0.0789907	0.0875695	0.110575	0.162919	0.156858	0.162784	0.0394309	0.0435642	0.0681393	0.0687233	0.0907376	0.0760764	0.0817372	0.121168	0.140397	0.270026	0.0470376	0.0648046	0.125122	0.0860047	0.0828879	0.0819995	0.0844237	0.126809	0.116751	0.18416	Q15750	TGF-beta-activated kinase 1 and MAP3K7-binding protein 1 OS=Homo sapiens OX=9606 GN=TAB1 PE=1 SV=1	unknown	NUCLEUS	0.665535	unknown
P45974	0.0296057	0.053218	0.0750234	0.126544	0.078794	0.111809	0.111727	0.0361037	0.041272	0.335904	0.0351899	0.0488821	0.0914782	0.0702409	0.10926	0.0887345	0.0765357	0.0293901	0.0375255	0.412763	0.042439	0.0712456	0.130686	0.0832382	0.0831729	0.0684718	0.0669789	0.0659672	0.0609418	0.326858	P45974	Ubiquitin carboxyl-terminal hydrolase 5 OS=Homo sapiens OX=9606 GN=USP5 PE=1 SV=2	unknown	CYTOSOL	0.942464	CYTOSOL
O43617	0.0463056	0.049112	0.0556463	0.101135	0.0802547	0.0776158	0.150268	0.202124	0.123586	0.113952	0.0568914	0.0425192	0.0749132	0.0774485	0.0981994	0.0730077	0.0984255	0.140735	0.139798	0.198062	0.0543678	0.0645156	0.104548	0.0763875	0.0733498	0.0692282	0.0939901	0.142562	0.131609	0.189442	O43617	Trafficking protein particle complex subunit 3 OS=Homo sapiens OX=9606 GN=TRAPPC3 PE=1 SV=1	unknown	NUCLEUS	0.906492	NUCLEUS
Q9BSJ2	0.0348368	0.0448725	0.0520014	0.0860768	0.0578383	0.064598	0.146395	0.303103	0.200438	0.00983966	0.0647044	0.0355556	0.0713962	0.0675556	0.0844277	0.0662977	0.101249	0.25278	0.222943	0.0330901	0.0485364	0.0515411	0.0853155	0.0811592	0.0988944	0.113279	0.175269	0.215262	0.112107	0.0186356	Q9BSJ2	Gamma-tubulin complex component 2 OS=Homo sapiens OX=9606 GN=TUBGCP2 PE=1 SV=2	unknown	RIBOSOME	0.522762	unknown
Q71RC2	0.0359782	0.0545977	0.0627199	0.105735	0.0724842	0.086676	0.208128	0.191414	0.149631	0.0326355	0.0797124	0.0679993	0.0989655	0.101596	0.100123	0.07596	0.106681	0.127372	0.142907	0.0986849	0.0474284	0.0628533	0.0947743	0.0814588	0.0882813	0.0943623	0.156721	0.211384	0.13098	0.0317562	Q71RC2	La-related protein 4 OS=Homo sapiens OX=9606 GN=LARP4 PE=1 SV=3	unknown	RIBOSOME	0.847765	RIBOSOME
Q86SQ0	0.0387309	0.0456109	0.0531425	0.0847251	0.0569274	0.0635391	0.126848	0.249298	0.249835	0.0313431	0.0807354	0.0396184	0.0648185	0.0675779	0.0704653	0.0617119	0.0784145	0.218066	0.238734	0.0798582	0.0687997	0.0723945	0.0953774	0.0722457	0.0787431	0.0761531	0.111788	0.180685	0.174143	0.0696705	Q86SQ0	Pleckstrin homology-like domain family B member 2 OS=Homo sapiens OX=9606 GN=PHLDB2 PE=1 SV=2	unknown	NUCLEUS	0.9703	NUCLEUS
P31751	0.0425727	0.0595712	0.0874426	0.143492	0.0771822	0.0977029	0.121746	0.0741194	0.0807044	0.215467	0.0377396	0.0456483	0.0762324	0.0725456	0.106499	0.0953202	0.0680859	0.0509802	0.0761135	0.370835	0.0452815	0.0637337	0.124109	0.0768872	0.073902	0.064424	0.0596851	0.0727639	0.0811038	0.33811	P31751	RAC-beta serine/threonine-protein kinase OS=Homo sapiens OX=9606 GN=AKT2 PE=1 SV=2	unknown	CYTOSOL	0.893873	CYTOSOL
Q9UH17	0.124064	0.0491534	0.0534633	0.0907132	0.077373	0.0850693	0.172293	0.197435	0.124885	0.0255516	0.151163	0.0388207	0.0617103	0.0841421	0.108039	0.0853324	0.121315	0.169658	0.13395	0.0458707	0.167255	0.0680924	0.0900837	0.063452	0.0600222	0.0506406	0.0934127	0.157369	0.0771714	0.172501	Q9UH17	DNA dC->dU-editing enzyme APOBEC-3B OS=Homo sapiens OX=9606 GN=APOBEC3B PE=1 SV=1	unknown	NUCLEUS	0.942502	NUCLEUS
Q9ULK4	0.17481	0.0437568	0.0348534	0.0662324	0.0571118	0.070684	0.12215	0.234745	0.15798	0.0376764	0.179966	0.0300374	0.0670362	0.0754158	0.0679386	0.044476	0.087276	0.174681	0.182287	0.0908857	0.188037	0.08278	0.0635681	0.0575814	0.0652008	0.0782083	0.124088	0.167737	0.105421	0.0673778	Q9ULK4	Mediator of RNA polymerase II transcription subunit 23 OS=Homo sapiens OX=9606 GN=MED23 PE=1 SV=2	unknown	NUCLEUS	0.94081	NUCLEUS
Q92538	0.0319717	0.0499381	0.0617781	0.103758	0.0662244	0.0700553	0.125157	0.192228	0.213656	0.0852337	0.0474648	0.0447252	0.083834	0.0786188	0.080928	0.061535	0.0751159	0.158167	0.218548	0.151064	0.0480932	0.0725372	0.121723	0.0722789	0.066923	0.0602357	0.0582881	0.0826427	0.11282	0.304458	Q92538	Golgi-specific brefeldin A-resistance guanine nucleotide exchange factor 1 OS=Homo sapiens OX=9606 GN=GBF1 PE=1 SV=2	unknown	NUCLEUS	0.785063	unknown
P04632	0.0330335	0.0535565	0.0842964	0.114709	0.0851603	0.121798	0.11587	0.0410163	0.0489098	0.30165	0.0349466	0.0489929	0.0845896	0.070015	0.0998957	0.0892356	0.0806751	0.0387934	0.0464735	0.406382	0.0439446	0.0640468	0.121321	0.0752183	0.0704894	0.0579502	0.0594661	0.0632229	0.0586588	0.385681	P04632	Calpain small subunit 1 OS=Homo sapiens OX=9606 GN=CAPNS1 PE=1 SV=1	unknown	CYTOSOL	0.932249	CYTOSOL
Q6SJ93	0.0522541	0.039314	0.0402239	0.0741552	0.0465012	0.0552617	0.113284	0.280611	0.271357	0.027037	0.0675105	0.0330485	0.0697809	0.0680888	0.0762706	0.0611921	0.0783054	0.214119	0.253229	0.0784553	0.0820836	0.0599437	0.0768079	0.0634855	0.0684055	0.0703468	0.111426	0.189464	0.203957	0.0740812	Q6SJ93	Protein FAM111B OS=Homo sapiens OX=9606 GN=FAM111B PE=1 SV=1	unknown	NUCLEUS	0.968854	NUCLEUS
Q96FV9	0.143467	0.047165	0.0433138	0.0709215	0.0568625	0.0651448	0.16495	0.221627	0.142191	0.0443578	0.169568	0.0387568	0.0590811	0.0628108	0.0725405	0.0605405	0.0968649	0.161568	0.138162	0.140108	0.163046	0.0656593	0.0636965	0.0488815	0.0567326	0.0577275	0.0991611	0.230238	0.14202	0.0728382	Q96FV9	THO complex subunit 1 OS=Homo sapiens OX=9606 GN=THOC1 PE=1 SV=1	NUCLEUS	NUCLEUS	1	NUCLEUS
P63104	0.038877	0.0504991	0.056289	0.100679	0.0763246	0.0903953	0.0922469	0.0396068	0.0332801	0.421803	0.0349212	0.0394663	0.0759963	0.060272	0.0889182	0.0717279	0.0589098	0.0269077	0.0307609	0.51212	0.0497547	0.0632105	0.112557	0.0678665	0.0651302	0.0530103	0.0636761	0.0629347	0.0563518	0.405508	P63104	14-3-3 protein zeta/delta OS=Homo sapiens OX=9606 GN=YWHAZ PE=1 SV=1	unknown	CYTOSOL	0.910388	CYTOSOL
A0A087X2I1	0.0207429	0.0333149	0.0485432	0.0849312	0.0503532	0.0720987	0.0858752	0.127901	0.299183	0.177057	0.022771	0.0280951	0.0528477	0.0453032	0.0673698	0.060637	0.0458403	0.0814979	0.213581	0.382057	0.0260596	0.0445309	0.0692813	0.0454182	0.0478318	0.0373087	0.0391328	0.109351	0.340214	0.240871	A0A087X2I1	26S proteasome regulatory subunit 10B OS=Homo sapiens OX=9606 GN=PSMC6 PE=1 SV=1	unknown	PROTEASOME	0.874999	PROTEASOME
P58546	0.0273938	0.056402	0.115705	0.156241	0.0721925	0.115125	0.16237	0.0238876	0.0377611	0.232923	0.0408812	0.0610592	0.0986235	0.0964398	0.150699	0.131461	0.149953	0.0404666	0.0360993	0.194317	0.0423529	0.0964415	0.142585	0.0879884	0.0879303	0.0647785	0.0852433	0.0766013	0.0649092	0.251169	P58546	Myotrophin OS=Homo sapiens OX=9606 GN=MTPN PE=1 SV=2	unknown	CYTOSOL	0.619497	unknown
Q53T59	0.0385246	0.0606557	0.0778689	0.119672	0.131967	0.0721311	0.109016	0.0590164	0.0581967	0.272951	0.0300092	0.0512465	0.0852955	0.0777932	0.0869114	0.112188	0.0797553	0.0320868	0.039012	0.405702	0.0498345	0.100772	0.150423	0.0698786	0.0685914	0.0728209	0.0610519	0.0645458	0.0588452	0.303236	Q53T59	HCLS1-binding protein 3 OS=Homo sapiens OX=9606 GN=HS1BP3 PE=1 SV=1	unknown	CYTOSOL	0.803122	unknown
P83436	0.0498658	0.0866726	0.0936047	0.10729	0.0771467	0.0864937	0.11042	0.0966011	0.104875	0.18703	0.0684704	0.0557735	0.103346	0.0869162	0.0803498	0.0640837	0.0656368	0.0743556	0.0834014	0.317667	0.0578968	0.100071	0.157001	0.0812875	0.0618919	0.0484889	0.0573168	0.088891	0.0918551	0.2553	P83436	Conserved oligomeric Golgi complex subunit 7 OS=Homo sapiens OX=9606 GN=COG7 PE=1 SV=1	unknown	CYTOSOL	0.599714	unknown
Q05639	0.0329618	0.0456172	0.0601175	0.103766	0.0638075	0.0734744	0.15289	0.229436	0.203306	0.034624	0.0559968	0.0398687	0.0838171	0.0882319	0.0886051	0.0698773	0.0868706	0.186731	0.216528	0.0834736	0.0551874	0.0543384	0.0882398	0.0795725	0.0893612	0.0868141	0.129064	0.163935	0.179685	0.0738026	Q05639	Elongation factor 1-alpha 2 OS=Homo sapiens OX=9606 GN=EEF1A2 PE=1 SV=1	unknown	NUCLEUS	0.658432	unknown
Q12979	0.0489842	0.0626006	0.0750424	0.14295	0.0863967	0.0961413	0.129421	0.0978379	0.0908775	0.169748	0.0545432	0.0429287	0.0848518	0.0791472	0.0896331	0.0734835	0.0611508	0.0589551	0.0775671	0.377739	0.0609383	0.0680928	0.136869	0.0774762	0.0707172	0.0638145	0.065684	0.0706094	0.079885	0.305914	Q12979	Active breakpoint cluster region-related protein OS=Homo sapiens OX=9606 GN=ABR PE=2 SV=2	unknown	CYTOSOL	0.7744	unknown
A0A1W2PNX8	0.0436823	0.0607609	0.0822676	0.117117	0.078612	0.106035	0.112758	0.0836399	0.0954253	0.219703	0.0537729	0.0441377	0.081091	0.0693341	0.0885241	0.0718947	0.0625155	0.0602183	0.0825834	0.385928	0.0555907	0.0695084	0.116013	0.0735582	0.0734213	0.0644718	0.0672496	0.0774597	0.0782811	0.324447	A0A1W2PNX8	Protein unc-45 homolog A OS=Homo sapiens OX=9606 GN=UNC45A PE=1 SV=1	unknown	CYTOSOL	0.869388	CYTOSOL
Q9H5N1	0.0452012	0.0483861	0.0528572	0.0994059	0.0836651	0.078949	0.0985484	0.0815827	0.0716604	0.339744	0.0460317	0.0448413	0.068254	0.0574074	0.0859788	0.087963	0.0592593	0.0452381	0.0628307	0.442196	0.0790225	0.111666	0.142526	0.0859793	0.0683197	0.0522654	0.0549411	0.039422	0.0647521	0.301106	Q9H5N1	Rab GTPase-binding effector protein 2 OS=Homo sapiens OX=9606 GN=RABEP2 PE=1 SV=2	unknown	CYTOSOL	0.885937	CYTOSOL
Q8N5A5	0.0401344	0.0409516	0.0500318	0.0748207	0.048579	0.0650141	0.117316	0.272859	0.240534	0.0497594	0.0457755	0.0343316	0.0696372	0.0628196	0.0792549	0.0618456	0.0741417	0.232043	0.239956	0.100195	0.0401578	0.0502331	0.0910362	0.0618143	0.0735748	0.0671567	0.0960918	0.201542	0.202617	0.115776	Q8N5A5	Zinc finger CCCH-type with G patch domain-containing protein OS=Homo sapiens OX=9606 GN=ZGPAT PE=1 SV=3	unknown	NUCLEUS	0.967882	NUCLEUS
A0A0D9SGE8	0.0662137	0.0493474	0.0501818	0.0923774	0.070326	0.0539961	0.122236	0.255856	0.200906	0.0385601	0.0611544	0.0380444	0.0727639	0.0732	0.0772878	0.0635526	0.0944569	0.211806	0.249959	0.0577751	0.0852725	0.059305	0.0771185	0.076993	0.0838926	0.0817287	0.118516	0.191463	0.167127	0.0585837	A0A0D9SGE8	PHD finger protein 6 OS=Homo sapiens OX=9606 GN=PHF6 PE=1 SV=1	unknown	NUCLEUS	0.964291	NUCLEUS
A8MXP9	0.210489	0.0484973	0.0339558	0.0828694	0.0683434	0.0897624	0.22739	0.154058	0.0693766	0.0152585	0.215533	0.041233	0.0506132	0.0674182	0.100323	0.090584	0.1632	0.155849	0.0913512	0.0238959	0.276518	0.111905	0.0549621	0.0471752	0.0518502	0.052801	0.108476	0.203144	0.0817804	0.0113886	A8MXP9	Matrin-3 OS=Homo sapiens OX=9606 GN=MATR3 PE=1 SV=1	unknown	NUCLEUS	0.854053	unknown
Q9Y6D5	0.0492871	0.0566584	0.065832	0.0956403	0.0764282	0.0848097	0.153988	0.204681	0.176304	0.0363713	0.0679487	0.0433332	0.0825146	0.0860999	0.0978721	0.0749251	0.0949931	0.145761	0.158573	0.14798	0.0471323	0.0591976	0.0871658	0.0767287	0.089793	0.0894904	0.125609	0.174697	0.155196	0.0949899	Q9Y6D5	Brefeldin A-inhibited guanine nucleotide-exchange protein 2 OS=Homo sapiens OX=9606 GN=ARFGEF2 PE=1 SV=3	unknown	RIBOSOME	0.466241	unknown
Q9P0T7	0.0657832	0.11544	0.139071	0.204215	0.133642	0.107456	0.148491	0.0568418	0.0191601	0.00989941	0.0799849	0.0808639	0.167127	0.217479	0.175163	0.105224	0.106228	0.0374184	0.0079106	0.0226017	0.0781553	0.0893204	0.194175	0.179126	0.118932	0.0917476	0.0771845	0.0786408	0.0514563	0.0412621	Q9P0T7	Transmembrane protein 9 OS=Homo sapiens OX=9606 GN=TMEM9 PE=1 SV=1	unknown	PM	0.313666	unknown
P26641	0.150282	0.165568	0.126851	0.131882	0.0676006	0.0602424	0.0845452	0.0968269	0.0703331	0.0458691	0.228534	0.0748217	0.115992	0.113176	0.0919718	0.0619088	0.069846	0.0811663	0.0733036	0.0892788	0.138055	0.0964362	0.09013	0.061359	0.0611185	0.0562756	0.0986441	0.151251	0.142328	0.104403	P26641	Elongation factor 1-gamma OS=Homo sapiens OX=9606 GN=EEF1G PE=1 SV=3	unknown	NUCLEUS-CHROMATIN	0.64721	NUCLEUS-CHROMATIN
Q9UJX6	0.0650447	0.0486594	0.0729891	0.0734856	0.0566038	0.0829196	0.091857	0.181728	0.194638	0.132075	0.0713527	0.0396601	0.0725921	0.0637394	0.0734773	0.0695822	0.065864	0.118272	0.186261	0.2392	0.0994161	0.0745237	0.0941918	0.0634604	0.0516288	0.0440996	0.0637677	0.116472	0.200369	0.192071	Q9UJX6	Anaphase-promoting complex subunit 2 OS=Homo sapiens OX=9606 GN=ANAPC2 PE=1 SV=1	unknown	NUCLEUS	0.76442	unknown
Q4G0F5	0.0448524	0.0820823	0.118197	0.228259	0.144086	0.113549	0.127632	0.0650244	0.0449919	0.031327	0.0712831	0.0679662	0.173203	0.200611	0.17073	0.0973523	0.0664242	0.0444283	0.0503928	0.0576084	0.0527693	0.0957282	0.212901	0.18199	0.147534	0.101373	0.0751093	0.0486386	0.0408936	0.0430622	Q4G0F5	Vacuolar protein sorting-associated protein 26B OS=Homo sapiens OX=9606 GN=VPS26B PE=1 SV=2	unknown	ER	0.590481	unknown
Q16777	0.533504	0.131279	0.0593938	0.0584463	0.0246704	0.0246357	0.0393455	0.0607573	0.0502652	0.0177026	0.566991	0.0642049	0.0581269	0.0691493	0.0371192	0.0292805	0.0492511	0.0581993	0.0423531	0.025325	0.653211	0.190441	0.034434	0.0241781	0.0199393	0.0144582	0.0170039	0.0134837	0.0140075	0.0188431	Q16777	Histone H2A type 2-C OS=Homo sapiens OX=9606 GN=HIST2H2AC PE=1 SV=4	unknown	NUCLEUS-CHROMATIN	0.850496	NUCLEUS-CHROMATIN
Q9BQ67	0.0416346	0.0422761	0.0497498	0.0798691	0.0631255	0.0653387	0.097992	0.262028	0.198999	0.0989864	0.047919	0.0415159	0.0723135	0.0624652	0.0863029	0.0626044	0.0783686	0.179079	0.166551	0.202881	0.0583569	0.0544203	0.0895333	0.0654389	0.0696524	0.0612253	0.0841329	0.130324	0.114755	0.272161	Q9BQ67	Glutamate-rich WD repeat-containing protein 1 OS=Homo sapiens OX=9606 GN=GRWD1 PE=1 SV=1	unknown	NUCLEUS	0.89488	NUCLEUS
B8ZZC8	0.049557	0.0433999	0.0458027	0.0998648	0.0627722	0.0714822	0.132452	0.206037	0.181859	0.106773	0.0660167	0.0379759	0.0737233	0.0778087	0.0753946	0.0600743	0.0702878	0.145775	0.172981	0.219963	0.056701	0.0550258	0.0785653	0.0613832	0.0652062	0.0617698	0.0806271	0.14171	0.155112	0.2439	B8ZZC8	Methyltransferase-like protein 5 OS=Homo sapiens OX=9606 GN=METTL5 PE=1 SV=1	unknown	NUCLEUS	0.909598	NUCLEUS
Q08AM6	0.0303013	0.040473	0.0494307	0.080103	0.0555449	0.0608387	0.101761	0.284232	0.266823	0.0304924	0.0449416	0.0372364	0.0711845	0.0698304	0.0723129	0.0559191	0.0690728	0.234799	0.276614	0.0680895	0.036027	0.0455299	0.0650961	0.0504448	0.0541222	0.0475029	0.0704663	0.251897	0.323718	0.0551962	Q08AM6	Protein VAC14 homolog OS=Homo sapiens OX=9606 GN=VAC14 PE=1 SV=1	unknown	NUCLEUS	0.898524	NUCLEUS
O14879	0.0386491	0.0524682	0.0691694	0.0963642	0.0823973	0.0997635	0.105232	0.100207	0.0979161	0.257833	0.0410984	0.0379323	0.0789698	0.0632611	0.0793351	0.0742207	0.0552849	0.0707501	0.0822577	0.41689	0.0398513	0.0601426	0.105844	0.0639815	0.068186	0.0577661	0.0564256	0.0779355	0.0787277	0.39114	O14879	Interferon-induced protein with tetratricopeptide repeats 3 OS=Homo sapiens OX=9606 GN=IFIT3 PE=1 SV=1	unknown	CYTOSOL	0.879244	CYTOSOL
B0QYK0	0.0175616	0.0269348	0.0439098	0.0564856	0.0401793	0.0570369	0.123072	0.261124	0.358516	0.0151801	0.0397958	0.0259426	0.0533502	0.0543316	0.0640174	0.0515297	0.0939709	0.275655	0.284117	0.05729	0.0394372	0.0586789	0.087033	0.0856556	0.0880926	0.0844265	0.144101	0.23622	0.150586	0.0257687	B0QYK0	RNA-binding protein EWS OS=Homo sapiens OX=9606 GN=EWSR1 PE=1 SV=1	unknown	NUCLEUS	0.837158	unknown
C9JRD2	0.0749649	0.0939403	0.11807	0.167343	0.113931	0.0941746	0.101437	0.0587225	0.0376386	0.139778	0.0832881	0.0656538	0.118014	0.133342	0.112453	0.0879002	0.0710798	0.0368964	0.0423223	0.24905	0.0786132	0.0775091	0.150712	0.0927459	0.0777299	0.0663575	0.0852379	0.074528	0.0791653	0.217401	C9JRD2	DnaJ homolog subfamily B member 2 (Fragment) OS=Homo sapiens OX=9606 GN=DNAJB2 PE=1 SV=1	unknown	CYTOSOL	0.457819	unknown
B4DKV7	0.0534203	0.066051	0.0849292	0.153153	0.104894	0.101725	0.119517	0.0810811	0.067228	0.168002	0.0764214	0.059808	0.100357	0.09968	0.11094	0.090635	0.0740217	0.0580236	0.0623923	0.267721	0.102049	0.117877	0.183189	0.109963	0.0863879	0.0508164	0.0482339	0.0543985	0.0480673	0.199017	B4DKV7	Epidermal growth factor receptor kinase substrate 8-like protein 1 OS=Homo sapiens OX=9606 GN=EPS8L1 PE=1 SV=1	unknown	CYTOSOL	0.548256	unknown
Q9UNN8	0.127384	0.116069	0.108632	0.182671	0.156482	0.117685	0.128031	0.0355642	0.00808277	0.0193986	0.22161	0.0929805	0.134509	0.15803	0.124954	0.0948181	0.0635796	0.0411613	0.0205807	0.0477766	0.221723	0.185615	0.201132	0.106177	0.0714355	0.0520152	0.0496731	0.0327901	0.0409876	0.0384503	Q9UNN8	Endothelial protein C receptor OS=Homo sapiens OX=9606 GN=PROCR PE=1 SV=1	unknown	PM	0.793961	PM
F5GZS6	0.156981	0.144409	0.140536	0.17582	0.111495	0.0984369	0.126532	0.031989	0.00715714	0.00664216	0.25079	0.105876	0.167044	0.172486	0.124088	0.0710613	0.0697177	0.0178014	0.0075218	0.0136141	0.220275	0.248586	0.223121	0.119324	0.0677901	0.0414891	0.0378776	0.022716	0.00969151	0.00912961	F5GZS6	4F2 cell-surface antigen heavy chain OS=Homo sapiens OX=9606 GN=SLC3A2 PE=1 SV=1	unknown	PM	0.777762	PM
P30154	0.0469031	0.0648659	0.055818	0.101457	0.0858226	0.0985297	0.0904797	0.0973322	0.0851573	0.273634	0.0620219	0.052901	0.0860304	0.0820878	0.0996822	0.0790867	0.063493	0.0659645	0.064258	0.344475	0.0469858	0.0672492	0.0985309	0.0688323	0.0622467	0.0619301	0.0694656	0.0946682	0.0934017	0.336689	P30154	Serine/threonine-protein phosphatase 2A 65 kDa regulatory subunit A beta isoform OS=Homo sapiens OX=9606 GN=PPP2R1B PE=1 SV=3	unknown	CYTOSOL	0.895441	CYTOSOL
Q92805	0.13006	0.231463	0.191917	0.141617	0.0706413	0.0444556	0.0529392	0.0570808	0.0417168	0.0381096	0.150859	0.120418	0.181174	0.125539	0.103185	0.070715	0.0504839	0.0458008	0.0522323	0.0995941	0.10633	0.188811	0.286838	0.132788	0.0723914	0.0465359	0.0361054	0.0424439	0.0342199	0.0535363	Q92805	Golgin subfamily A member 1 OS=Homo sapiens OX=9606 GN=GOLGA1 PE=1 SV=3	unknown	GOLGI	0.327943	unknown
Q9BYG5	0.102403	0.0839271	0.0728173	0.134646	0.104335	0.0908103	0.136095	0.134283	0.093467	0.0472165	0.172623	0.0820178	0.1111	0.109306	0.109653	0.0700143	0.0801266	0.0932302	0.101509	0.0704195	0.207777	0.174636	0.181372	0.0917836	0.0552854	0.0402212	0.0453861	0.0467203	0.0423948	0.114423	Q9BYG5	Partitioning defective 6 homolog beta OS=Homo sapiens OX=9606 GN=PARD6B PE=1 SV=1	unknown	NUCLEUS-CHROMATIN	0.291457	unknown
A0A0A0MTL6	0.0242558	0.0496141	0.104741	0.145535	0.146637	0.136714	0.121279	0.0749724	0.110254	0.0859978	0.0750688	0.055725	0.0785656	0.0911391	0.104308	0.0855591	0.0659921	0.0637601	0.0810208	0.298862	0.0876562	0.105871	0.14743	0.0916058	0.0652558	0.0630158	0.0528767	0.0722707	0.0780476	0.23597	A0A0A0MTL6	Rho family-interacting cell polarization regulator 1 OS=Homo sapiens OX=9606 GN=RIPOR1 PE=1 SV=1	unknown	CYTOSOL	0.336451	unknown
H0Y4E8	0.0257069	0.0407916	0.0555852	0.0950187	0.0661105	0.0656255	0.144153	0.199835	0.208081	0.099093	0.0394287	0.0394971	0.0692224	0.0690857	0.0857592	0.0779008	0.0774908	0.133593	0.174593	0.233429	0.0528222	0.0721401	0.108814	0.0629339	0.072291	0.0606701	0.0559915	0.0688198	0.119227	0.32629	H0Y4E8	Serine/threonine-protein kinase SIK3 (Fragment) OS=Homo sapiens OX=9606 GN=SIK3 PE=1 SV=1	unknown	NUCLEUS	0.687366	unknown
Q5T280	0.0892398	0.0426001	0.0583915	0.0896071	0.0609622	0.071245	0.150936	0.241278	0.17848	0.0172604	0.0964818	0.0359696	0.0681115	0.072671	0.0803265	0.0697439	0.0816775	0.211652	0.230903	0.0524627	0.130657	0.0470097	0.0575162	0.0678879	0.0730065	0.0818966	0.113955	0.187769	0.214036	0.0262662	Q5T280	Putative methyltransferase C9orf114 OS=Homo sapiens OX=9606 GN=SPOUT1 PE=1 SV=3	unknown	NUCLEUS	0.96641	NUCLEUS
O75381	0.0667165	0.150289	0.2459	0.300245	0.127413	0.0575829	0.0330054	0.00560468	0.00431768	0.00892598	0.06332	0.104606	0.217912	0.274244	0.143326	0.0693098	0.0466343	0.00998289	0.0165431	0.0541215	0.0643154	0.156792	0.312409	0.223337	0.132035	0.0577356	0.0275737	0.00724681	0.006331	0.012224	O75381	Peroxisomal membrane protein PEX14 OS=Homo sapiens OX=9606 GN=PEX14 PE=1 SV=1	PEROXISOME	PEROXISOME	1	PEROXISOME
O15264	0.0536067	0.050127	0.0536067	0.106367	0.0620709	0.0684661	0.145396	0.231825	0.170131	0.0584031	0.0692261	0.0452489	0.0835471	0.0921771	0.0910109	0.0671736	0.0740309	0.16061	0.182815	0.134161	0.0703026	0.0714361	0.0998787	0.0756801	0.0786588	0.0754956	0.0984289	0.154049	0.14709	0.12898	O15264	Mitogen-activated protein kinase 13 OS=Homo sapiens OX=9606 GN=MAPK13 PE=1 SV=1	unknown	NUCLEUS	0.95676	NUCLEUS
P46977	0.0562899	0.135326	0.232212	0.288973	0.138874	0.0795834	0.0617765	0.00464337	0.000722789	0.0015989	0.0688918	0.097036	0.247573	0.277241	0.177916	0.0793571	0.0415195	0.00313548	0.00223377	0.00509601	0.0805804	0.165633	0.269865	0.202855	0.135418	0.0764487	0.0470877	0.012828	0.00470073	0.00458321	P46977	Dolichyl-diphosphooligosaccharide--protein glycosyltransferase subunit STT3A OS=Homo sapiens OX=9606 GN=STT3A PE=1 SV=2	unknown	ER	0.910293	ER
P10644	0.0403884	0.0651868	0.0846712	0.186139	0.102246	0.0942187	0.0963167	0.0489561	0.0479762	0.233901	0.043166	0.0607186	0.121555	0.125034	0.122343	0.0804243	0.0598784	0.0313111	0.0387287	0.31684	0.0502239	0.0822949	0.148851	0.104817	0.0883368	0.0611749	0.0581809	0.058626	0.068161	0.279333	P10644	cAMP-dependent protein kinase type I-alpha regulatory subunit OS=Homo sapiens OX=9606 GN=PRKAR1A PE=1 SV=1	unknown	CYTOSOL	0.760695	unknown
O15498	0.0656656	0.103091	0.108141	0.143336	0.0960593	0.0810625	0.106521	0.0616068	0.0700675	0.16445	0.0883051	0.0821384	0.12345	0.128798	0.13331	0.0884889	0.0735653	0.0424981	0.0474448	0.192002	0.0626916	0.109288	0.165063	0.096521	0.0853448	0.0704723	0.0542803	0.0670088	0.0721895	0.217141	O15498	Synaptobrevin homolog YKT6 OS=Homo sapiens OX=9606 GN=YKT6 PE=1 SV=1	unknown	CYTOSOL	0.471402	unknown
H3BMD8	0.0493278	0.0342142	0.0585072	0.114233	0.0777932	0.0528512	0.133148	0.185999	0.112842	0.181085	0.0862801	0.0438472	0.0933522	0.0792079	0.0678925	0.0707214	0.0622348	0.0975955	0.142857	0.256011	0.0814954	0.0432289	0.117225	0.0639612	0.0711292	0.0741067	0.0791795	0.10719	0.123732	0.238752	H3BMD8	cAMP-regulated phosphoprotein 19 OS=Homo sapiens OX=9606 GN=ARPP19 PE=1 SV=1	unknown	NUCLEUS	0.602713	unknown
Q8WVK2	0.0336383	0.0353202	0.0523412	0.0956001	0.0557723	0.0701695	0.171219	0.23863	0.22726	0.0200484	0.0471197	0.0326757	0.0637037	0.0693529	0.0797954	0.068176	0.0974279	0.235684	0.238102	0.067962	0.0666454	0.0442068	0.0812959	0.0647303	0.0698691	0.0705075	0.104245	0.204756	0.221289	0.0724545	Q8WVK2	U4/U6.U5 small nuclear ribonucleoprotein 27 kDa protein OS=Homo sapiens OX=9606 GN=SNRNP27 PE=1 SV=1	unknown	NUCLEUS	0.967334	NUCLEUS
Q9UBS4	0.0459578	0.122523	0.209884	0.316019	0.128947	0.0799331	0.0724599	0.00989505	0.00537424	0.00900703	0.0633064	0.100638	0.225682	0.258198	0.192756	0.0769212	0.0489554	0.00807474	0.00767643	0.017791	0.0657338	0.151309	0.263554	0.211736	0.131932	0.0771209	0.0526868	0.0194544	0.00945197	0.0170204	Q9UBS4	DnaJ homolog subfamily B member 11 OS=Homo sapiens OX=9606 GN=DNAJB11 PE=1 SV=1	unknown	ER	0.942743	ER
P61026	0.106166	0.128715	0.150167	0.197349	0.122903	0.0925403	0.117022	0.0356673	0.0131593	0.0363115	0.148839	0.0913997	0.176578	0.199423	0.147914	0.0792888	0.0698011	0.0193272	0.0105531	0.0568761	0.120423	0.186198	0.197044	0.144427	0.10058	0.0634782	0.0613181	0.0417781	0.0205404	0.0642134	P61026	Ras-related protein Rab-10 OS=Homo sapiens OX=9606 GN=RAB10 PE=1 SV=1	unknown	PM	0.602137	unknown
Q8TED0	0.17851	0.0608752	0.0721404	0.090338	0.05026	0.0719237	0.125	0.189991	0.123484	0.0374783	0.193161	0.0351768	0.0606465	0.0637635	0.0683053	0.0687506	0.113634	0.204916	0.152284	0.0393624	0.213228	0.104065	0.0647349	0.0473572	0.0479994	0.0459927	0.0793033	0.209014	0.142072	0.0462335	Q8TED0	U3 small nucleolar RNA-associated protein 15 homolog OS=Homo sapiens OX=9606 GN=UTP15 PE=1 SV=3	NUCLEUS	NUCLEUS	1	NUCLEUS
Q7L5N7	0.0549452	0.115761	0.174688	0.259255	0.140078	0.108112	0.0924358	0.0264417	0.0181472	0.010136	0.0607466	0.0794556	0.209832	0.267132	0.197466	0.091644	0.0560382	0.00943447	0.00602313	0.022227	0.0549632	0.137581	0.264632	0.19148	0.143351	0.0856755	0.0652006	0.0296221	0.0135879	0.013907	Q7L5N7	Lysophosphatidylcholine acyltransferase 2 OS=Homo sapiens OX=9606 GN=LPCAT2 PE=1 SV=1	unknown	ER	0.923014	ER
Q07889	0.0480621	0.0496841	0.0544647	0.0989414	0.0753799	0.0713676	0.149991	0.202663	0.188407	0.0610381	0.0675482	0.042876	0.0737306	0.082718	0.0917053	0.0783101	0.0828897	0.154846	0.197035	0.128342	0.0629096	0.0821319	0.108344	0.0856269	0.0865007	0.0550459	0.102665	0.151595	0.153779	0.111402	Q07889	Son of sevenless homolog 1 OS=Homo sapiens OX=9606 GN=SOS1 PE=1 SV=1	unknown	NUCLEUS	0.950319	NUCLEUS
O43815	0.0498216	0.0653634	0.0956481	0.16961	0.104122	0.0850243	0.11227	0.113238	0.0969085	0.107994	0.0540003	0.0551861	0.123997	0.125823	0.126625	0.0838313	0.0779604	0.0862029	0.0955846	0.17079	0.0646516	0.0702887	0.146798	0.0961221	0.0872582	0.0796968	0.0741569	0.0908932	0.115172	0.174964	O43815	Striatin OS=Homo sapiens OX=9606 GN=STRN PE=1 SV=4	unknown	NUCLEUS	0.333968	unknown
A8MQ02	0.0837874	0.0683668	0.0739247	0.120532	0.0709823	0.0720357	0.117916	0.159456	0.166649	0.0663506	0.125977	0.0522408	0.0869261	0.0827426	0.0816625	0.0640916	0.0686707	0.131652	0.166565	0.139471	0.231982	0.186451	0.152748	0.0809069	0.0524039	0.0382597	0.0488909	0.0674071	0.080278	0.0606725	A8MQ02	Afadin OS=Homo sapiens OX=9606 GN=AFDN PE=1 SV=2	unknown	NUCLEUS-CHROMATIN	0.456676	unknown
G3V3R7	0.0227175	0.0347192	0.0415774	0.0780111	0.0998714	0.088727	0.0874411	0.058294	0.0514359	0.437205	0.0352497	0.0433277	0.0714436	0.068611	0.0888586	0.101553	0.0712337	0.0315778	0.0503567	0.437789	0.0498029	0.0617011	0.118208	0.0769146	0.0751833	0.0659373	0.0576859	0.0630641	0.064427	0.367076	G3V3R7	Ataxin-3 (Fragment) OS=Homo sapiens OX=9606 GN=ATXN3 PE=1 SV=1	unknown	CYTOSOL	0.896046	CYTOSOL
E9PNP3	0.0337695	0.0476401	0.0653825	0.105573	0.0893986	0.0843503	0.109935	0.0649904	0.0555801	0.343381	0.0362272	0.0444802	0.0823151	0.0504823	0.0841372	0.0773848	0.062701	0.0561629	0.0712755	0.434834	0.046805	0.0579749	0.11084	0.0630398	0.0734862	0.0703658	0.0696423	0.0806313	0.0740289	0.353186	E9PNP3	Mth938 domain-containing protein OS=Homo sapiens OX=9606 GN=AAMDC PE=1 SV=1	unknown	CYTOSOL	0.927705	CYTOSOL
Q9BVS4	0.0214299	0.0296605	0.0339086	0.0703205	0.0465579	0.0520577	0.08718	0.209786	0.367457	0.0816423	0.0401819	0.0305809	0.0533134	0.044449	0.066902	0.0548881	0.052526	0.148587	0.330853	0.17772	0.028332	0.0346249	0.0542457	0.0370706	0.0349821	0.0321242	0.037263	0.132124	0.488486	0.120747	Q9BVS4	Serine/threonine-protein kinase RIO2 OS=Homo sapiens OX=9606 GN=RIOK2 PE=1 SV=2	unknown	NUCLEUS	0.332468	unknown
F5GYQ1	0.0641475	0.138272	0.162659	0.222959	0.121725	0.0978107	0.122703	0.043216	0.00797157	0.0185351	0.0871205	0.109778	0.223555	0.204326	0.149706	0.0818968	0.0798074	0.0200294	0.00680705	0.0369736	0.078559	0.155106	0.23439	0.166379	0.11433	0.0765393	0.0737192	0.0502083	0.0165316	0.0342377	F5GYQ1	V-type proton ATPase subunit OS=Homo sapiens OX=9606 GN=ATP6V0D1 PE=1 SV=1	unknown	ER	0.462717	unknown
Q9UHL4	0.0632162	0.250452	0.257949	0.248729	0.0612057	0.0297556	0.026309	0.0229773	0.023006	0.0164	0.0738106	0.216992	0.340057	0.207309	0.0747544	0.0225994	0.0178278	0.00746321	0.00945573	0.0297305	0.0871544	0.240073	0.358795	0.166685	0.0600644	0.0216498	0.0160246	0.013434	0.0115836	0.0245365	Q9UHL4	Dipeptidyl peptidase 2 OS=Homo sapiens OX=9606 GN=DPP7 PE=1 SV=3	LYSOSOME	LYSOSOME	1	LYSOSOME
Q9Y496	0.038178	0.0461752	0.0608948	0.103662	0.0653454	0.082267	0.138271	0.181966	0.179972	0.103268	0.0483103	0.0373118	0.0716501	0.0739521	0.0877002	0.0680692	0.0759024	0.143844	0.173418	0.219842	0.0493398	0.0551164	0.0897325	0.0645413	0.0703614	0.0701008	0.0857366	0.132557	0.145718	0.236796	Q9Y496	Kinesin-like protein KIF3A OS=Homo sapiens OX=9606 GN=KIF3A PE=1 SV=4	unknown	NUCLEUS	0.893925	NUCLEUS
A0A075B7G8	0.0338475	0.0475578	0.0590403	0.119023	0.093659	0.0940874	0.119452	0.0536418	0.0716367	0.308055	0.0437069	0.0397336	0.0774804	0.0622298	0.083382	0.083382	0.064567	0.0430642	0.0629894	0.439465	0.0501689	0.0743243	0.136318	0.0768581	0.0665541	0.0570946	0.0486486	0.0787162	0.0744932	0.336824	A0A075B7G8	Amyloid-beta A4 precursor protein-binding family B member 1 OS=Homo sapiens OX=9606 GN=APBB1 PE=1 SV=7	unknown	CYTOSOL	0.922681	CYTOSOL
J3KN67	0.0311133	0.0642724	0.102279	0.129772	0.083252	0.0926631	0.121353	0.0348116	0.0397532	0.30073	0.0306077	0.0451977	0.0705107	0.0693953	0.0979506	0.0967161	0.102621	0.0246587	0.0232012	0.439142	0.0441372	0.104835	0.137225	0.0845147	0.0691683	0.0486431	0.053149	0.0508522	0.0417672	0.365708	J3KN67	Tropomyosin alpha-3 chain OS=Homo sapiens OX=9606 GN=TPM3 PE=1 SV=1	unknown	CYTOSOL	0.886154	CYTOSOL
A0A0D9SF70	0.0664883	0.076971	0.104094	0.149617	0.103434	0.0905692	0.17674	0.0946377	0.0821391	0.0553092	0.0848488	0.0770346	0.117385	0.116873	0.130257	0.110252	0.102182	0.0779723	0.0885997	0.0945954	0.0749648	0.0847032	0.182263	0.115773	0.103396	0.107026	0.0844314	0.0892926	0.0826564	0.0754925	A0A0D9SF70	ADP-ribosylation factor GTPase-activating protein 2 OS=Homo sapiens OX=9606 GN=ARFGAP2 PE=1 SV=1	unknown	NUCLEUS	0.269929	unknown
Q9H1E3	0.0486812	0.0559651	0.0555459	0.117904	0.0624279	0.0843319	0.118253	0.0320699	0.0288734	0.395948	0.0463704	0.0366846	0.0502514	0.0446492	0.0687118	0.08022	0.0779251	0.0222065	0.021194	0.551787	0.0348688	0.0405068	0.0763046	0.040763	0.0509498	0.0382003	0.0509498	0.0495563	0.0531281	0.564772	Q9H1E3	Nuclear ubiquitous casein and cyclin-dependent kinase substrate 1 OS=Homo sapiens OX=9606 GN=NUCKS1 PE=1 SV=1	unknown	CYTOSOL	0.753891	unknown
E9PEE8	0.0915799	0.10055	0.129485	0.222222	0.130498	0.0979456	0.132957	0.0441262	0.0175058	0.0331308	0.14001	0.0933401	0.147578	0.198789	0.152371	0.0857719	0.0751766	0.0317861	0.0227043	0.0524723	0.149873	0.177122	0.202575	0.161551	0.0985177	0.0705195	0.0705195	0.0365324	0.0161701	0.0166193	E9PEE8	Integrin beta OS=Homo sapiens OX=9606 GN=ITGB6 PE=1 SV=1	unknown	PM	0.710525	PM
A0A0G2JNY3	0.0688091	0.0687106	0.0708793	0.120958	0.0853707	0.0893139	0.121254	0.160883	0.137421	0.0763998	0.0974197	0.0559333	0.105145	0.0966471	0.0963381	0.0678307	0.0670581	0.119901	0.166409	0.127318	0.125026	0.140986	0.175772	0.110088	0.0828729	0.0529977	0.0540209	0.0710047	0.0808267	0.106405	A0A0G2JNY3	Rho GTPase-activating protein 27 OS=Homo sapiens OX=9606 GN=ARHGAP27 PE=1 SV=1	unknown	NUCLEUS	0.525254	unknown
Q6XZF7	0.0680322	0.0746891	0.065545	0.114704	0.0694952	0.0792977	0.127798	0.151207	0.157644	0.0915874	0.108034	0.0477425	0.0773428	0.0819806	0.0683399	0.0701132	0.0671123	0.177056	0.19097	0.111308	0.0763977	0.0658363	0.0935599	0.0624498	0.0637699	0.0661807	0.0759959	0.16571	0.176386	0.153714	Q6XZF7	Dynamin-binding protein OS=Homo sapiens OX=9606 GN=DNMBP PE=1 SV=1	unknown	NUCLEUS	0.949606	NUCLEUS
Q12996	0.202013	0.0506731	0.0368038	0.0823841	0.0652045	0.0809411	0.200774	0.183238	0.0867809	0.0111871	0.212124	0.0411864	0.0615096	0.0794195	0.0986631	0.0858658	0.135817	0.158331	0.0977105	0.0293735	0.184596	0.0974786	0.0861548	0.0662817	0.0730948	0.0717925	0.107142	0.167969	0.0896841	0.0558072	Q12996	Cleavage stimulation factor subunit 3 OS=Homo sapiens OX=9606 GN=CSTF3 PE=1 SV=1	NUCLEUS	NUCLEUS	1	NUCLEUS
Q9BVC4	0.0493628	0.0616586	0.0661461	0.0854425	0.0524143	0.0631843	0.0994435	0.289804	0.200054	0.0324897	0.105487	0.0649208	0.092723	0.0577318	0.0713028	0.0572183	0.082233	0.199751	0.192048	0.0765845	0.0804336	0.0987935	0.101416	0.0673195	0.0524567	0.0699423	0.0935478	0.216821	0.167687	0.0515824	Q9BVC4	Target of rapamycin complex subunit LST8 OS=Homo sapiens OX=9606 GN=MLST8 PE=1 SV=1	unknown	NUCLEUS	0.96461	NUCLEUS
Q9NYB9	0.0502765	0.0525494	0.0625572	0.100417	0.0776198	0.0679513	0.127591	0.238661	0.199851	0.022526	0.087296	0.042184	0.0826872	0.0824703	0.0825245	0.0771024	0.0754758	0.172857	0.208697	0.0887057	0.0943518	0.0834438	0.122624	0.0900739	0.0812654	0.0804919	0.119846	0.166493	0.123682	0.0377281	Q9NYB9	Abl interactor 2 OS=Homo sapiens OX=9606 GN=ABI2 PE=1 SV=1	unknown	NUCLEUS	0.855442	unknown
F5H365	0.0508126	0.0872613	0.106625	0.148393	0.0975807	0.0901537	0.192048	0.165649	0.051695	0.00978013	0.0822651	0.0799398	0.146584	0.140621	0.120245	0.0892708	0.132408	0.114998	0.0602641	0.0334039	0.0627349	0.0946089	0.184608	0.109746	0.0887215	0.0791197	0.114312	0.162747	0.0689159	0.0344873	F5H365	Protein transport protein Sec23A OS=Homo sapiens OX=9606 GN=SEC23A PE=1 SV=1	unknown	NUCLEUS	0.377643	unknown
Q9H9Q4	0.0798623	0.0815237	0.0759464	0.116886	0.0759464	0.078557	0.1246	0.165183	0.136229	0.0652664	0.108125	0.0432707	0.092975	0.0888243	0.0831172	0.0682785	0.0692124	0.13417	0.168621	0.143406	0.094692	0.0753415	0.102083	0.0742665	0.0694737	0.0720717	0.0956327	0.144681	0.147234	0.124524	Q9H9Q4	Non-homologous end-joining factor 1 OS=Homo sapiens OX=9606 GN=NHEJ1 PE=1 SV=1	unknown	NUCLEUS	0.920446	NUCLEUS
O15530	0.0327412	0.0410688	0.0631459	0.119342	0.0685678	0.0808495	0.153342	0.172064	0.1679	0.10098	0.0492679	0.043298	0.0792521	0.0786664	0.0951791	0.0756477	0.088556	0.138995	0.159585	0.191552	0.0492958	0.100563	0.113803	0.0980282	0.103099	0.0749296	0.0852113	0.126901	0.0915493	0.15662	O15530	3-phosphoinositide-dependent protein kinase 1 OS=Homo sapiens OX=9606 GN=PDPK1 PE=1 SV=1	unknown	NUCLEUS	0.841003	unknown
Q9NZC9	0.0343325	0.0430932	0.0506701	0.0867547	0.0611829	0.0612776	0.11782	0.266231	0.250746	0.0278922	0.0667244	0.0348065	0.0680243	0.0745234	0.0785673	0.0645581	0.0740901	0.203062	0.266176	0.0694685	0.0642287	0.0722892	0.107076	0.0835737	0.0881554	0.089513	0.110979	0.179026	0.178093	0.027066	Q9NZC9	SWI/SNF-related matrix-associated actin-dependent regulator of chromatin subfamily A-like protein 1 OS=Homo sapiens OX=9606 GN=SMARCAL1 PE=1 SV=1	unknown	NUCLEUS	0.932349	NUCLEUS
Q8ND24	0.0277054	0.0510103	0.100014	0.12265	0.118954	0.115433	0.230902	0.130817	0.0792086	0.0233049	0.0539055	0.0577537	0.101752	0.11648	0.146948	0.108292	0.143796	0.122846	0.0823474	0.06588	0.0434443	0.063253	0.12023	0.109361	0.122725	0.123046	0.166353	0.156556	0.0621508	0.0328817	Q8ND24	RING finger protein 214 OS=Homo sapiens OX=9606 GN=RNF214 PE=1 SV=2	unknown	NUCLEUS	0.272398	unknown
P48739	0.0362576	0.0676421	0.0992665	0.153198	0.0753431	0.109871	0.125437	0.0350709	0.0468496	0.251064	0.0563635	0.060264	0.10955	0.0831633	0.112507	0.0887557	0.0560535	0.0340067	0.0479038	0.351432	0.0509601	0.0899212	0.132489	0.081634	0.0790731	0.0630455	0.0657791	0.0703159	0.0605133	0.306269	P48739	Phosphatidylinositol transfer protein beta isoform OS=Homo sapiens OX=9606 GN=PITPNB PE=1 SV=2	unknown	CYTOSOL	0.888335	CYTOSOL
Q00341	0.0331889	0.0621442	0.096467	0.154658	0.085351	0.0870573	0.189958	0.152602	0.12059	0.0179842	0.0530716	0.0629311	0.137765	0.151261	0.124163	0.0820369	0.113614	0.119334	0.110828	0.0449943	0.0446361	0.0847845	0.156596	0.127535	0.109443	0.0947841	0.148892	0.143519	0.0749183	0.0148924	Q00341	Vigilin OS=Homo sapiens OX=9606 GN=HDLBP PE=1 SV=2	unknown	RIBOSOME	0.500171	unknown
P40306	0.0244738	0.0372813	0.0536394	0.0925691	0.0634035	0.0724068	0.0855947	0.114126	0.228506	0.227999	0.0215249	0.030083	0.0588693	0.0508299	0.0752075	0.0531639	0.0438278	0.0886929	0.206691	0.37111	0.0291375	0.0409382	0.0675991	0.0423223	0.04713	0.0509907	0.0453817	0.090472	0.292177	0.293852	P40306	Proteasome subunit beta type-10 OS=Homo sapiens OX=9606 GN=PSMB10 PE=1 SV=1	PROTEASOME	PROTEASOME	1	PROTEASOME
Q96D71	0.119759	0.0871992	0.0754775	0.103386	0.0723146	0.080129	0.102518	0.0979906	0.0991069	0.162119	0.125901	0.0557808	0.0846847	0.073048	0.0781532	0.0679429	0.053003	0.0623123	0.0840841	0.31509	0.117745	0.118109	0.129985	0.0719111	0.0607612	0.0541512	0.0542239	0.0717295	0.0745624	0.246822	Q96D71	RalBP1-associated Eps domain-containing protein 1 OS=Homo sapiens OX=9606 GN=REPS1 PE=1 SV=3	unknown	CYTOSOL	0.423279	unknown
A6NNK5	0.142087	0.0586667	0.0650178	0.099888	0.0713893	0.0966107	0.110636	0.0529059	0.0590738	0.243725	0.0877401	0.0348587	0.062653	0.0510643	0.0774865	0.0743529	0.0567196	0.0360639	0.0444634	0.474598	0.149227	0.101614	0.0872733	0.0560273	0.0579513	0.0444576	0.0529232	0.0582592	0.0487673	0.343501	A6NNK5	TP53-binding protein 1 OS=Homo sapiens OX=9606 GN=TP53BP1 PE=1 SV=2	unknown	CYTOSOL	0.782465	unknown
Q9ULM6	0.0352143	0.0462028	0.0707679	0.130335	0.111583	0.12622	0.229699	0.163301	0.061137	0.0255409	0.0539897	0.0522125	0.117256	0.138013	0.145406	0.116296	0.15287	0.113098	0.0686689	0.0421894	0.0351521	0.0588475	0.107836	0.11127	0.128336	0.134863	0.206391	0.163012	0.0339283	0.0203638	Q9ULM6	CCR4-NOT transcription complex subunit 6 OS=Homo sapiens OX=9606 GN=CNOT6 PE=1 SV=2	unknown	NUCLEUS	0.292729	unknown
A0A1W2PRA1	0.0627078	0.114443	0.177883	0.289733	0.152214	0.094361	0.0821918	0.0161591	0.00485437	0.00545285	0.090668	0.0915521	0.23664	0.233202	0.174754	0.090275	0.0500982	0.0046169	0.00854617	0.0196464	0.0785678	0.120112	0.245318	0.173854	0.135036	0.103466	0.0695272	0.0313554	0.0180096	0.0247543	A0A1W2PRA1	Stromal interaction molecule 2 OS=Homo sapiens OX=9606 GN=STIM2 PE=1 SV=1	unknown	ER	0.936504	ER
A0A087WYV9	0.268386	0.39967	0.158934	0.0792876	0.0352629	0.0199655	0.0133582	0.00833094	0.00646366	0.0103419	0.366566	0.256225	0.193471	0.0902581	0.035576	0.0190086	0.0122058	0.00436155	0.00556586	0.0167627	0.275737	0.35733	0.202255	0.0657581	0.036741	0.0203984	0.0103185	0.00829059	0.00688894	0.016283	A0A087WYV9	SYNJ2BP-COX16 readthrough OS=Homo sapiens OX=9606 GN=SYNJ2BP-COX16 PE=4 SV=1	unknown	MITOCHONDRIA	0.882715	unknown
P09497-2	0.0948479	0.0701981	0.0639378	0.138601	0.130695	0.0952507	0.219191	0.0911539	0.00762972	0.0884956	0.123554	0.0641502	0.0805091	0.100583	0.127905	0.135378	0.174368	0.0604772	0.018365	0.11471	0.140331	0.131005	0.154354	0.0922091	0.0825076	0.076653	0.0957001	0.0792144	0.0384402	0.109585	P09497-2	Isoform Non-brain of Clathrin light chain B OS=Homo sapiens OX=9606 GN=CLTB	unknown	NUCLEUS	0.32499	unknown
Q5T0F9	0.051073	0.0526883	0.0641105	0.11503	0.0769172	0.0748019	0.129067	0.159334	0.172218	0.104761	0.0775832	0.0523367	0.0751011	0.0833983	0.100773	0.0670165	0.0791433	0.127721	0.194667	0.142259	0.066186	0.0773149	0.120498	0.0827227	0.080685	0.0633254	0.0558799	0.0905992	0.104354	0.258435	Q5T0F9	Coiled-coil and C2 domain-containing protein 1B OS=Homo sapiens OX=9606 GN=CC2D1B PE=1 SV=1	unknown	NUCLEUS	0.765227	unknown
Q9NYZ3	0.0579937	0.053814	0.063915	0.0933473	0.0691397	0.0714037	0.130094	0.201498	0.224835	0.0339603	0.074549	0.0459092	0.0868599	0.091391	0.0978029	0.0754039	0.0855775	0.18586	0.191759	0.0648884	0.0568389	0.0602584	0.0951368	0.0760638	0.0781915	0.0835106	0.117743	0.192819	0.179977	0.0594605	Q9NYZ3	G2 and S phase-expressed protein 1 OS=Homo sapiens OX=9606 GN=GTSE1 PE=1 SV=3	unknown	NUCLEUS	0.843135	unknown
Q9BZD3	0.0334858	0.0396814	0.0684467	0.108128	0.0657914	0.0936716	0.129223	0.132763	0.122289	0.20652	0.0516136	0.0364088	0.0616467	0.0660943	0.0747828	0.0790236	0.073645	0.0997104	0.103124	0.353951	0.0405324	0.0641258	0.103448	0.0405324	0.0738052	0.0659407	0.0550514	0.0937689	0.140351	0.322444	Q9BZD3	Putative GRINL1B complex locus protein 2 OS=Homo sapiens OX=9606 GN=GCOM2 PE=5 SV=2	unknown	CYTOSOL	0.679411	unknown
E9PD50	0.021736	0.0441917	0.0557075	0.104937	0.0640564	0.0886714	0.200734	0.213329	0.164388	0.0422485	0.0738729	0.0461706	0.0939707	0.0903042	0.0965508	0.0602933	0.0695274	0.156165	0.184546	0.128599	0.0391769	0.0586181	0.0994782	0.0734725	0.0872328	0.0966588	0.143452	0.199672	0.151574	0.0506649	E9PD50	Protein SMG7 OS=Homo sapiens OX=9606 GN=SMG7 PE=1 SV=1	unknown	RIBOSOME	0.699112	unknown
Q9NVI1	0.077302	0.0596859	0.0634525	0.106392	0.0747233	0.0726662	0.120067	0.156777	0.130498	0.138437	0.0839402	0.0409723	0.080001	0.0691943	0.0828258	0.0662918	0.0596315	0.11408	0.142639	0.260424	0.0804224	0.0599825	0.0864534	0.05739	0.0691518	0.0665047	0.079631	0.119037	0.121766	0.259661	Q9NVI1	Fanconi anemia group I protein OS=Homo sapiens OX=9606 GN=FANCI PE=1 SV=4	NUCLEUS	NUCLEUS	1	NUCLEUS
Q92733	0.0779319	0.044681	0.0485846	0.0869187	0.0614469	0.0754887	0.150388	0.200264	0.183554	0.0707425	0.0892152	0.0450356	0.0626152	0.0634053	0.0849355	0.0756518	0.0967869	0.15611	0.159534	0.166711	0.0912964	0.0601304	0.0917539	0.0641619	0.0800023	0.0845199	0.103334	0.160977	0.147252	0.116572	Q92733	Proline-rich protein PRCC OS=Homo sapiens OX=9606 GN=PRCC PE=1 SV=1	NUCLEUS	NUCLEUS	1	NUCLEUS
E9PMH5	0.0470132	0.058495	0.0798293	0.113189	0.0874321	0.0847944	0.126222	0.132971	0.145151	0.124903	0.0583048	0.0526703	0.0844357	0.0808427	0.0962763	0.0728401	0.0687571	0.12453	0.133023	0.228319	0.0593068	0.0680895	0.108792	0.0750779	0.0711115	0.0714893	0.0793276	0.102748	0.108792	0.255265	E9PMH5	Baculoviral IAP repeat-containing protein 2 OS=Homo sapiens OX=9606 GN=BIRC2 PE=1 SV=1	unknown	NUCLEUS	0.589828	unknown
P13473	0.0578258	0.215058	0.258642	0.274291	0.0857129	0.0373578	0.0448723	0.0147427	0.0069181	0.00458026	0.0669286	0.197919	0.338371	0.228768	0.0888773	0.0282828	0.0262382	0.00775722	0.00573273	0.0111247	0.0738511	0.224326	0.322845	0.194607	0.0788644	0.0349411	0.0309533	0.0179263	0.00921003	0.0124763	P13473	Lysosome-associated membrane glycoprotein 2 OS=Homo sapiens OX=9606 GN=LAMP2 PE=1 SV=2	unknown	LYSOSOME	0.667431	LYSOSOME
P39023	0.0287991	0.0453186	0.0709885	0.105777	0.0711125	0.0849878	0.153766	0.221809	0.208513	0.00892949	0.0491061	0.0423873	0.0976265	0.104589	0.0992437	0.0776636	0.106197	0.200337	0.188383	0.0344676	0.0379005	0.0604044	0.101496	0.0944296	0.102688	0.1	0.14594	0.204728	0.141643	0.0107707	P39023	60S ribosomal protein L3 OS=Homo sapiens OX=9606 GN=RPL3 PE=1 SV=2	RIBOSOME	RIBOSOME	1	RIBOSOME
Q8TAE6	0.0246322	0.0626069	0.0725282	0.134451	0.0697913	0.086897	0.108792	0.0783442	0.0776599	0.284297	0.0567944	0.0473868	0.0682927	0.056446	0.117422	0.0749129	0.0616725	0.0512195	0.0606272	0.405226	0.0405728	0.0328162	0.121718	0.0787589	0.0602625	0.0721957	0.0698091	0.0704057	0.0787589	0.374702	Q8TAE6	Protein phosphatase 1 regulatory subunit 14C OS=Homo sapiens OX=9606 GN=PPP1R14C PE=1 SV=3	unknown	CYTOSOL	0.901287	CYTOSOL
Q86VY4	0.0338583	0.0493438	0.0676509	0.0959318	0.0669948	0.09521	0.166798	0.187992	0.215682	0.0205381	0.0490522	0.0329893	0.0750464	0.0892094	0.0812211	0.0772486	0.103502	0.184118	0.200311	0.107302	0.044741	0.0468857	0.0799202	0.0792648	0.0913586	0.0924012	0.143398	0.20342	0.167645	0.0509666	Q86VY4	Testis-specific Y-encoded-like protein 5 OS=Homo sapiens OX=9606 GN=TSPYL5 PE=1 SV=2	unknown	RIBOSOME	0.810137	RIBOSOME
P52943	0.190498	0.132378	0.0864992	0.120591	0.0744401	0.0550367	0.0736241	0.1448	0.098105	0.0240276	0.251461	0.0953759	0.109266	0.105909	0.0826437	0.0495399	0.0526072	0.106372	0.117194	0.0296313	0.257993	0.222821	0.192437	0.100706	0.0570956	0.0374053	0.0407764	0.0451354	0.0338837	0.0117455	P52943	Cysteine-rich protein 2 OS=Homo sapiens OX=9606 GN=CRIP2 PE=1 SV=1	unknown	NUCLEUS-CHROMATIN	0.614432	NUCLEUS-CHROMATIN
O00429-4	0.053655	0.0559619	0.0664024	0.098134	0.0737671	0.0904446	0.114094	0.145484	0.144185	0.157872	0.0651234	0.0452406	0.0726048	0.0715483	0.0927438	0.0774501	0.0786028	0.11871	0.136373	0.241603	0.0572097	0.0679808	0.112037	0.0719306	0.0721312	0.0707519	0.0793287	0.117542	0.103046	0.248042	O00429-4	Isoform 3 of Dynamin-1-like protein OS=Homo sapiens OX=9606 GN=DNM1L	unknown	NUCLEUS	0.544181	unknown
X6RLX0	0.0498998	0.0597349	0.0648528	0.102836	0.0627563	0.0736088	0.132311	0.212147	0.217404	0.0244489	0.100324	0.046234	0.0779764	0.0768591	0.0917953	0.0665975	0.081739	0.19611	0.201446	0.0609194	0.0498626	0.0591628	0.0978424	0.0842521	0.0897046	0.0889654	0.123456	0.186328	0.15348	0.0669468	X6RLX0	ELKS/Rab6-interacting/CAST family member 1 OS=Homo sapiens OX=9606 GN=ERC1 PE=1 SV=1	unknown	NUCLEUS	0.799633	unknown
Q15642	0.0292534	0.0367573	0.0453544	0.090187	0.0628717	0.0783101	0.161117	0.255056	0.216841	0.0242509	0.048281	0.0337238	0.0684686	0.0698105	0.0833905	0.0740843	0.105781	0.227329	0.235264	0.0538676	0.0420321	0.0494426	0.0900144	0.0710573	0.0805812	0.0837921	0.113489	0.19934	0.172437	0.0978149	Q15642	Cdc42-interacting protein 4 OS=Homo sapiens OX=9606 GN=TRIP10 PE=1 SV=3	unknown	NUCLEUS	0.928825	NUCLEUS
Q9HB66	0.317286	0.413727	0.139498	0.0463934	0.0128694	0.0185891	0.0136638	0.0125516	0.0168414	0.0085796	0.477053	0.254214	0.149375	0.0372485	0.0160957	0.00875476	0.0109842	0.0108211	0.0147906	0.0206634	0.348504	0.391181	0.151969	0.0275591	0.0187402	0.0146457	0.0148031	0.00850394	0.00913386	0.0149606	Q9HB66	Alternative protein MKKS OS=Homo sapiens OX=9606 GN=MKKS PE=1 SV=1	unknown	MITOCHONDRIA	0.96218	MITOCHONDRIA
Q96S66	0.0609022	0.126147	0.194929	0.24606	0.16327	0.0961687	0.0716187	0.0188415	0.00707432	0.0149891	0.0668903	0.0843968	0.212342	0.274378	0.168985	0.0903687	0.0622273	0.0120801	0.00848058	0.0198517	0.0759608	0.125406	0.25966	0.189528	0.149987	0.0892701	0.0627805	0.0251999	0.0122259	0.00998194	Q96S66	Chloride channel CLIC-like protein 1 OS=Homo sapiens OX=9606 GN=CLCC1 PE=1 SV=1	ER	ER	1	ER
P51532	0.333828	0.088519	0.0375278	0.078236	0.0463267	0.0473868	0.0753737	0.134316	0.112265	0.0462207	0.341912	0.0576035	0.0569223	0.0737264	0.0549542	0.0487473	0.0604799	0.104534	0.116342	0.0847778	0.390101	0.131939	0.0593501	0.0395667	0.0475402	0.0360313	0.0502482	0.0918459	0.1017	0.0516774	P51532	Transcription activator BRG1 OS=Homo sapiens OX=9606 GN=SMARCA4 PE=1 SV=2	unknown	NUCLEUS-CHROMATIN	0.912772	NUCLEUS-CHROMATIN
Q92621	0.249305	0.0780317	0.0581635	0.100679	0.0766934	0.0730646	0.0708256	0.0509059	0.0532994	0.189031	0.171268	0.0510651	0.0891184	0.0908748	0.089024	0.0761444	0.0521793	0.0332754	0.0467216	0.300329	0.224455	0.109303	0.0972101	0.062361	0.058968	0.0515631	0.0422926	0.0515148	0.0667691	0.235563	Q92621	Nuclear pore complex protein Nup205 OS=Homo sapiens OX=9606 GN=NUP205 PE=1 SV=3	unknown	NUCLEUS-CHROMATIN	0.442094	unknown
Q2TAA2	0.0530055	0.053574	0.0692056	0.103169	0.0731846	0.101037	0.09379	0.0339633	0.0331107	0.38596	0.070393	0.0604059	0.103415	0.0691044	0.0990657	0.0958441	0.0573454	0.0330219	0.0462307	0.365174	0.0552868	0.0686478	0.131767	0.0684174	0.0679567	0.0670352	0.078323	0.0760194	0.0679567	0.31859	Q2TAA2	Isoamyl acetate-hydrolyzing esterase 1 homolog OS=Homo sapiens OX=9606 GN=IAH1 PE=1 SV=1	unknown	CYTOSOL	0.929508	CYTOSOL
P53365	0.0534097	0.0761593	0.0818331	0.123786	0.0908893	0.0944899	0.125641	0.0992362	0.0702673	0.184288	0.0624039	0.0586638	0.101701	0.0910954	0.107695	0.074649	0.0800799	0.0571268	0.0651194	0.301465	0.0613909	0.0878167	0.14095	0.0774853	0.070914	0.0659943	0.0604421	0.0864111	0.0707383	0.277858	P53365	Arfaptin-2 OS=Homo sapiens OX=9606 GN=ARFIP2 PE=1 SV=1	unknown	CYTOSOL	0.778648	unknown
P28838	0.0923083	0.127787	0.0709578	0.107192	0.064436	0.0853334	0.094821	0.0326368	0.0399824	0.284545	0.104169	0.0767777	0.0800707	0.0444852	0.058807	0.0673987	0.0485243	0.0229135	0.0342299	0.462624	0.0900362	0.112776	0.109525	0.0526307	0.0548073	0.0450936	0.0514668	0.0511255	0.058836	0.373703	P28838	Cytosol aminopeptidase OS=Homo sapiens OX=9606 GN=LAP3 PE=1 SV=3	unknown	CYTOSOL	0.785722	unknown
E7ESC6	0.030091	0.0474686	0.0612102	0.111688	0.0804433	0.102836	0.100629	0.0468918	0.0579754	0.360766	0.0301129	0.036824	0.0712766	0.0535913	0.0830436	0.070755	0.0525759	0.0266566	0.0414766	0.533688	0.0355661	0.0553857	0.0904439	0.0560818	0.064162	0.0532881	0.0497042	0.0552258	0.0709535	0.469189	E7ESC6	Exportin-7 OS=Homo sapiens OX=9606 GN=XPO7 PE=1 SV=1	unknown	CYTOSOL	0.894264	CYTOSOL
P38606	0.0459265	0.120683	0.152732	0.182395	0.0881563	0.0894352	0.100564	0.0626988	0.0609427	0.0964661	0.0528224	0.085676	0.178548	0.122016	0.089218	0.0703648	0.0584003	0.0495454	0.057201	0.236209	0.050205	0.101523	0.185227	0.10921	0.0746483	0.0581265	0.0565745	0.0752157	0.0787593	0.210511	P38606	V-type proton ATPase catalytic subunit A OS=Homo sapiens OX=9606 GN=ATP6V1A PE=1 SV=2	unknown	CYTOSOL	0.209803	unknown
Q7Z7L7	0.0372395	0.051247	0.0495388	0.0874616	0.0823369	0.091903	0.08507	0.108644	0.068671	0.337889	0.0470348	0.0509095	0.0684533	0.0712517	0.0855667	0.0762028	0.0686686	0.0512324	0.0642557	0.416424	0.0468163	0.0595105	0.0933279	0.0742358	0.0715954	0.0648929	0.0532142	0.0705799	0.0808368	0.38499	Q7Z7L7	Protein zer-1 homolog OS=Homo sapiens OX=9606 GN=ZER1 PE=1 SV=1	unknown	CYTOSOL	0.907834	CYTOSOL
Q71UI9	0.427325	0.12943	0.0764722	0.0820011	0.0421663	0.0431655	0.0570877	0.0472955	0.0494271	0.0456302	0.482366	0.0557695	0.0598698	0.053373	0.0477351	0.0338274	0.0318465	0.0491619	0.0586785	0.127372	0.594359	0.149351	0.0585478	0.0279346	0.0263082	0.019787	0.0210147	0.0207596	0.0169489	0.0649893	Q71UI9	Histone H2A.V OS=Homo sapiens OX=9606 GN=H2AFV PE=1 SV=3	unknown	NUCLEUS-CHROMATIN	0.851986	NUCLEUS-CHROMATIN
Q12929	0.122432	0.10533	0.0992063	0.176396	0.111454	0.0961848	0.12783	0.0839376	0.0521513	0.0250786	0.187495	0.0846277	0.127217	0.155054	0.133065	0.0821089	0.0806468	0.0552121	0.0515786	0.0429943	0.169026	0.193997	0.230592	0.134643	0.0822827	0.0481825	0.0466325	0.0452337	0.0288263	0.0205848	Q12929	Epidermal growth factor receptor kinase substrate 8 OS=Homo sapiens OX=9606 GN=EPS8 PE=1 SV=1	unknown	PM	0.729278	PM
Q8IV38	0.0359334	0.0594041	0.0763586	0.150693	0.0937559	0.101601	0.111533	0.0419434	0.046878	0.2819	0.0396825	0.0401047	0.0919453	0.0918609	0.105792	0.0690645	0.044664	0.0260892	0.0405268	0.45027	0.0399656	0.0618972	0.119765	0.0766944	0.0792707	0.0597173	0.0580658	0.0498084	0.0476945	0.407121	Q8IV38	Ankyrin repeat and MYND domain-containing protein 2 OS=Homo sapiens OX=9606 GN=ANKMY2 PE=1 SV=1	unknown	CYTOSOL	0.883916	CYTOSOL
Q14914	0.0257447	0.0464338	0.0589173	0.121179	0.0714008	0.10749	0.124446	0.0367115	0.036906	0.370771	0.0416279	0.0336749	0.078503	0.0512527	0.0782403	0.0764013	0.0473836	0.0321702	0.040577	0.520169	0.0433048	0.0529818	0.105356	0.0569963	0.0642076	0.0538615	0.0603913	0.0624357	0.0557696	0.444695	Q14914	Prostaglandin reductase 1 OS=Homo sapiens OX=9606 GN=PTGR1 PE=1 SV=2	unknown	CYTOSOL	0.908355	CYTOSOL
Q16718	0.40356	0.414719	0.106259	0.0246867	0.0108472	0.00554828	0.00832242	0.0125616	0.00414563	0.00935104	0.452412	0.290678	0.151407	0.0357909	0.0142489	0.0102347	0.00922351	0.00689465	0.0116443	0.0174664	0.332998	0.374556	0.143386	0.0384325	0.0206889	0.013182	0.0107755	0.0173126	0.0148342	0.033835	Q16718	NADH dehydrogenase [ubiquinone] 1 alpha subcomplex subunit 5 OS=Homo sapiens OX=9606 GN=NDUFA5 PE=1 SV=3	unknown	MITOCHONDRIA	0.954736	MITOCHONDRIA
P35658	0.0620462	0.0507277	0.0573773	0.0954938	0.0646894	0.0732297	0.141868	0.202833	0.201985	0.0497502	0.0783284	0.0434629	0.0764417	0.0798551	0.0982747	0.0783516	0.0877326	0.159635	0.183772	0.114146	0.0984494	0.0706902	0.101895	0.0739376	0.0776339	0.0740681	0.0778636	0.133643	0.154124	0.137694	P35658	Nuclear pore complex protein Nup214 OS=Homo sapiens OX=9606 GN=NUP214 PE=1 SV=2	unknown	NUCLEUS	0.962646	NUCLEUS
P18583	0.138407	0.0419164	0.0387367	0.0714504	0.0562554	0.0721842	0.148832	0.19668	0.204598	0.0309404	0.143529	0.0348895	0.0578857	0.0647016	0.078847	0.0708853	0.106427	0.186795	0.188889	0.0671514	0.182351	0.0786322	0.0625316	0.0538326	0.0653857	0.06585	0.104756	0.194491	0.162249	0.0299207	P18583	Protein SON OS=Homo sapiens OX=9606 GN=SON PE=1 SV=4	unknown	NUCLEUS	0.984036	NUCLEUS
P35251	0.16813	0.0610409	0.0490469	0.0785424	0.0523208	0.05382	0.108864	0.212037	0.185295	0.0309029	0.228489	0.0548292	0.0770073	0.0746115	0.0601684	0.0495585	0.0623588	0.147854	0.174276	0.0708467	0.354295	0.134898	0.075597	0.0501339	0.0512279	0.0359878	0.0634124	0.0986457	0.112528	0.0232751	P35251	Replication factor C subunit 1 OS=Homo sapiens OX=9606 GN=RFC1 PE=1 SV=4	unknown	NUCLEUS-CHROMATIN	0.812919	NUCLEUS-CHROMATIN
Q9HAU0	0.106551	0.0718758	0.0666667	0.109024	0.063457	0.0642989	0.109813	0.197948	0.181689	0.0286767	0.171687	0.0657474	0.0899849	0.0879612	0.0776544	0.0600998	0.0690889	0.140625	0.157238	0.0799134	0.127767	0.120193	0.118096	0.0767304	0.0689233	0.0591937	0.0752738	0.164938	0.165987	0.0228968	Q9HAU0	Pleckstrin homology domain-containing family A member 5 OS=Homo sapiens OX=9606 GN=PLEKHA5 PE=1 SV=1	unknown	NUCLEUS	0.892704	NUCLEUS
M0R205	0.104866	0.0786726	0.0867823	0.125	0.0775541	0.0812826	0.100112	0.0527591	0.0569538	0.236018	0.108198	0.0527096	0.0781843	0.0780917	0.0831867	0.06151	0.0606762	0.0387216	0.0501158	0.388606	0.0859118	0.0800181	0.125581	0.0720843	0.0508897	0.0624504	0.0554233	0.0691375	0.0635838	0.33492	M0R205	Interferon regulatory factor 3 (Fragment) OS=Homo sapiens OX=9606 GN=IRF3 PE=1 SV=1	unknown	CYTOSOL	0.783204	unknown
P18754	0.521835	0.111411	0.0524758	0.0642033	0.0335443	0.0307707	0.0541884	0.0512658	0.0465934	0.0337118	0.543966	0.059625	0.0587272	0.0549776	0.0470557	0.034328	0.0395036	0.0424611	0.0529707	0.066385	0.666492	0.157498	0.0281664	0.0181729	0.0201716	0.0150057	0.0188494	0.0170966	0.0212478	0.037299	P18754	Regulator of chromosome condensation OS=Homo sapiens OX=9606 GN=RCC1 PE=1 SV=1	NUCLEUS-CHROMATIN	NUCLEUS-CHROMATIN	1	NUCLEUS-CHROMATIN
P49441	0.0279586	0.0503638	0.0607047	0.101685	0.0756415	0.0892378	0.109728	0.0348525	0.041938	0.40789	0.0385113	0.0418947	0.0639865	0.0616977	0.0817992	0.0706538	0.048164	0.0255747	0.0298537	0.537864	0.0469395	0.0540751	0.0894191	0.0609878	0.0690155	0.057643	0.0614338	0.0654477	0.0626603	0.432378	P49441	Inositol polyphosphate 1-phosphatase OS=Homo sapiens OX=9606 GN=INPP1 PE=1 SV=1	unknown	CYTOSOL	0.898151	CYTOSOL
Q96KB5	0.028095	0.0566953	0.0822638	0.150632	0.0845882	0.10576	0.128095	0.0378474	0.0501769	0.275846	0.0415198	0.0562737	0.0834313	0.0739	0.110589	0.0885233	0.0817339	0.0463507	0.0361666	0.381512	0.0371954	0.0673624	0.118401	0.0708309	0.0738279	0.0599233	0.057687	0.0597408	0.0537621	0.401269	Q96KB5	Lymphokine-activated killer T-cell-originated protein kinase OS=Homo sapiens OX=9606 GN=PBK PE=1 SV=3	unknown	CYTOSOL	0.9237	CYTOSOL
O43166	0.134447	0.091664	0.0646406	0.0904508	0.0550925	0.0476046	0.103105	0.209923	0.186193	0.0168791	0.205866	0.0684876	0.082504	0.0667181	0.061497	0.0521936	0.0622328	0.163904	0.180671	0.0559254	0.197957	0.170098	0.1179	0.0566942	0.0502294	0.0499969	0.0783982	0.133883	0.123093	0.0217506	O43166	Signal-induced proliferation-associated 1-like protein 1 OS=Homo sapiens OX=9606 GN=SIPA1L1 PE=1 SV=4	unknown	NUCLEUS	0.471827	unknown
Q8WW12	0.04701	0.0549026	0.0674041	0.120002	0.0727042	0.0892384	0.186946	0.141549	0.11234	0.107904	0.0361947	0.0376068	0.0559643	0.0726867	0.0971386	0.134894	0.133259	0.10799	0.0915645	0.232702	0.0568613	0.073222	0.130139	0.0821084	0.0893613	0.0937076	0.0790632	0.109099	0.0913269	0.195111	Q8WW12	PEST proteolytic signal-containing nuclear protein OS=Homo sapiens OX=9606 GN=PCNP PE=1 SV=2	unknown	NUCLEUS	0.446519	unknown
Q15631	0.0358487	0.0390069	0.0539578	0.0956525	0.0696143	0.0807351	0.126126	0.179479	0.141043	0.178538	0.0424701	0.0522903	0.073895	0.0767671	0.0974003	0.0825959	0.0943803	0.163904	0.138371	0.177927	0.0481679	0.080752	0.0959145	0.0670827	0.083662	0.0678102	0.0792587	0.107133	0.0986331	0.271586	Q15631	Translin OS=Homo sapiens OX=9606 GN=TSN PE=1 SV=1	unknown	NUCLEUS	0.66209	unknown
Q15058	0.0662068	0.080301	0.054135	0.0923415	0.0610959	0.0602806	0.119432	0.233738	0.201395	0.0310731	0.11949	0.0678328	0.0776107	0.0760907	0.0772704	0.0617528	0.0824429	0.192064	0.204156	0.0412895	0.127767	0.126673	0.0878396	0.0637739	0.0683318	0.0729809	0.105615	0.172069	0.155351	0.0195989	Q15058	Kinesin-like protein KIF14 OS=Homo sapiens OX=9606 GN=KIF14 PE=1 SV=1	unknown	NUCLEUS	0.967992	NUCLEUS
Q86YV5	0.0497857	0.0575008	0.0776129	0.111639	0.0659413	0.0662051	0.143356	0.179228	0.2	0.0487306	0.0885529	0.037527	0.0634449	0.0650648	0.0615551	0.0777538	0.0977322	0.188445	0.204644	0.115281	0.070527	0.0739753	0.11093	0.0695511	0.0691607	0.06838	0.1	0.169941	0.183344	0.08419	Q86YV5	Tyrosine-protein kinase PRAG1 OS=Homo sapiens OX=9606 GN=PRAG1 PE=1 SV=4	unknown	NUCLEUS	0.969543	NUCLEUS
A0A087X0R6	0.0494381	0.0765696	0.111747	0.197172	0.113961	0.1028	0.115686	0.0554538	0.0439263	0.133245	0.0749944	0.0676179	0.136801	0.160159	0.162097	0.0949631	0.0791483	0.0363609	0.035057	0.152802	0.0567877	0.0900474	0.192569	0.142307	0.114546	0.0814688	0.0655069	0.0584893	0.0423024	0.155976	A0A087X0R6	Sorting nexin-12 OS=Homo sapiens OX=9606 GN=SNX12 PE=1 SV=1	unknown	PM	0.219765	unknown
O94964-2	0.035499	0.0441663	0.0473093	0.0728757	0.0532553	0.0562623	0.112674	0.288904	0.25795	0.0311042	0.0618914	0.033662	0.0642285	0.0638389	0.0714652	0.0594313	0.0771644	0.242112	0.264294	0.0619119	0.0388316	0.0420322	0.0713969	0.0700665	0.0836017	0.0860503	0.130936	0.214017	0.209158	0.0539092	O94964-2	Isoform 2 of Protein SOGA1 OS=Homo sapiens OX=9606 GN=SOGA1	unknown	NUCLEUS	0.94183	NUCLEUS
O00462	0.0655029	0.229593	0.201496	0.25985	0.072153	0.0458853	0.0412303	0.0415628	0.0270989	0.0156276	0.0811247	0.188653	0.309685	0.217475	0.0960395	0.0290235	0.0223723	0.00917061	0.0110854	0.0353724	0.0660562	0.186396	0.294964	0.188358	0.120994	0.0359712	0.0228908	0.0398954	0.0202747	0.0241988	O00462	Beta-mannosidase OS=Homo sapiens OX=9606 GN=MANBA PE=2 SV=3	unknown	LYSOSOME	0.349118	unknown
P27695	0.0733522	0.0600424	0.0547362	0.0971557	0.0570781	0.0865879	0.158325	0.165528	0.174628	0.0725667	0.105387	0.0422819	0.0790102	0.0797259	0.0858627	0.0830395	0.0976062	0.161493	0.156151	0.109443	0.100199	0.0787852	0.0828239	0.0663641	0.0740632	0.0706346	0.104347	0.148663	0.146174	0.127945	P27695	DNA-(apurinic or apyrimidinic site) lyase OS=Homo sapiens OX=9606 GN=APEX1 PE=1 SV=2	NUCLEUS	NUCLEUS	1	NUCLEUS
Q7L5Y9	0.026329	0.0394434	0.0453499	0.111723	0.0629693	0.0655721	0.104515	0.124337	0.17299	0.246771	0.0349759	0.0340563	0.0690322	0.0531932	0.0700469	0.0624049	0.0498795	0.0803685	0.148862	0.397181	0.0355979	0.0411338	0.0754353	0.0447076	0.0522056	0.047896	0.0499632	0.0938299	0.278862	0.280369	Q7L5Y9	Macrophage erythroblast attacher OS=Homo sapiens OX=9606 GN=MAEA PE=1 SV=1	unknown	PROTEASOME	0.47892	unknown
A0A1W2PNP0	0.0691475	0.129235	0.187339	0.283254	0.144734	0.0821759	0.0624087	0.0190184	0.011718	0.0109693	0.0749691	0.0895784	0.232714	0.266382	0.17267	0.0749117	0.0474154	0.0105623	0.00774949	0.0230476	0.0896233	0.137691	0.260316	0.187169	0.13599	0.0892345	0.0570595	0.0249332	0.00622114	0.0117618	A0A1W2PNP0	GPI transamidase component PIG-T (Fragment) OS=Homo sapiens OX=9606 GN=PIGT PE=1 SV=1	unknown	ER	0.958785	ER
J3QRU8	0.0589169	0.0725878	0.0812313	0.0913741	0.0457753	0.0629741	0.123655	0.218116	0.213001	0.032369	0.0768116	0.047343	0.0657005	0.0652174	0.0826087	0.0594203	0.0748792	0.224638	0.21401	0.089372	0.0512952	0.0459306	0.0684617	0.0502733	0.0605937	0.0678997	0.0890002	0.250702	0.250856	0.0649875	J3QRU8	ARF GTPase-activating protein GIT1 OS=Homo sapiens OX=9606 GN=GIT1 PE=1 SV=1	unknown	NUCLEUS	0.961928	NUCLEUS
Q9BRP4	0.0223414	0.0513852	0.105451	0.100089	0.0549598	0.130474	0.0857909	0.0719392	0.138517	0.239053	0.0523303	0.0425184	0.0678659	0.0678659	0.0629599	0.060507	0.102208	0.0572363	0.0572363	0.429272	0.048004	0.0530571	0.0924709	0.0419404	0.0803436	0.0656897	0.0672057	0.048004	0.0884285	0.414856	Q9BRP4	Proteasomal ATPase-associated factor 1 OS=Homo sapiens OX=9606 GN=PAAF1 PE=1 SV=2	unknown	CYTOSOL	0.686282	unknown
A0A0C4DFL7	0.058051	0.111163	0.179267	0.301877	0.148159	0.0895268	0.0827668	0.0168323	0.00577217	0.0065857	0.0681575	0.0885723	0.228362	0.2781	0.183324	0.0811422	0.046324	0.00937782	0.00553051	0.0111091	0.0711933	0.132519	0.233838	0.197109	0.145376	0.0956451	0.070192	0.0277169	0.0137133	0.0126975	A0A0C4DFL7	Lanosterol 14-alpha demethylase OS=Homo sapiens OX=9606 GN=CYP51A1 PE=1 SV=1	unknown	ER	0.952967	ER
J3KR97	0.0307252	0.0534669	0.0693066	0.105153	0.0785941	0.106711	0.102385	0.048187	0.044243	0.361228	0.0406808	0.0381488	0.0683078	0.0621747	0.0868195	0.0703896	0.0560416	0.041553	0.047461	0.488423	0.0405102	0.0626553	0.0957091	0.060774	0.0660729	0.0509873	0.0572528	0.0605496	0.0583057	0.447183	J3KR97	Tubulin-specific chaperone D OS=Homo sapiens OX=9606 GN=TBCD PE=1 SV=1	unknown	CYTOSOL	0.917711	CYTOSOL
Q5TCU3	0.0444447	0.0563097	0.0712937	0.110675	0.0857516	0.0761694	0.101177	0.0677426	0.0495458	0.336891	0.0340176	0.040748	0.065426	0.0613937	0.0732139	0.0717215	0.0616408	0.0367157	0.0410247	0.514098	0.0494289	0.0645603	0.123188	0.0735711	0.0626263	0.0518626	0.0560928	0.0521813	0.0529926	0.413496	Q5TCU3	Tropomyosin beta chain OS=Homo sapiens OX=9606 GN=TPM2 PE=1 SV=1	unknown	CYTOSOL	0.895069	CYTOSOL
G3V4K3	0.0373237	0.0404635	0.0458586	0.0908769	0.0563835	0.0578428	0.126166	0.285721	0.224517	0.0348472	0.0558358	0.0412026	0.0705439	0.0701943	0.0767867	0.0596814	0.0812815	0.23498	0.252709	0.0567847	0.0623696	0.0746245	0.116187	0.0950668	0.103671	0.101794	0.134752	0.169118	0.110972	0.0314456	G3V4K3	Spermatogenesis-defective protein 39 homolog OS=Homo sapiens OX=9606 GN=VIPAS39 PE=1 SV=1	unknown	NUCLEUS	0.809517	unknown
Q7Z2E3	0.0796356	0.0541589	0.0722963	0.105956	0.0593892	0.0772735	0.158259	0.198414	0.167538	0.0270795	0.0856348	0.0495627	0.090538	0.086854	0.0927644	0.0726743	0.0884442	0.167453	0.186191	0.0798834	0.0854347	0.0704623	0.0886525	0.0702653	0.0763068	0.0759785	0.113278	0.169162	0.180523	0.069937	Q7Z2E3	Aprataxin OS=Homo sapiens OX=9606 GN=APTX PE=1 SV=2	unknown	NUCLEUS	0.913968	NUCLEUS
P08133	0.0293954	0.0452065	0.052444	0.0963144	0.0796125	0.109565	0.0850685	0.0223806	0.026389	0.453624	0.0330591	0.0503721	0.0998825	0.0671367	0.104583	0.0875832	0.0598512	0.022405	0.0287505	0.446377	0.042737	0.0611085	0.110929	0.0587732	0.0673361	0.0534797	0.0558929	0.0551144	0.0446053	0.450023	P08133	Annexin A6 OS=Homo sapiens OX=9606 GN=ANXA6 PE=1 SV=3	unknown	CYTOSOL	0.881317	CYTOSOL
Q9UJC3	0.0381193	0.0575045	0.0748644	0.110597	0.0711754	0.115732	0.138445	0.116745	0.120362	0.156456	0.0452462	0.0395349	0.0737004	0.0686389	0.0962038	0.075855	0.0734268	0.0991792	0.10212	0.326094	0.0482261	0.060706	0.103049	0.0689963	0.0768408	0.0716705	0.0847745	0.113478	0.0945801	0.277679	Q9UJC3	Protein Hook homolog 1 OS=Homo sapiens OX=9606 GN=HOOK1 PE=1 SV=2	unknown	CYTOSOL	0.622756	unknown
P26373	0.0271675	0.048887	0.0705002	0.112268	0.0761949	0.0760205	0.151484	0.247268	0.185082	0.00512899	0.0507512	0.0499422	0.0995859	0.117277	0.0984303	0.0761556	0.107357	0.192748	0.174345	0.0334072	0.0389458	0.0677072	0.0995479	0.10243	0.107566	0.0992021	0.149783	0.201565	0.128189	0.00506339	P26373	60S ribosomal protein L13 OS=Homo sapiens OX=9606 GN=RPL13 PE=1 SV=4	RIBOSOME	RIBOSOME	1	RIBOSOME
Q12792	0.033486	0.0595686	0.0933546	0.139152	0.073353	0.102217	0.137953	0.0456615	0.0646815	0.250573	0.0479149	0.0447481	0.0834897	0.0609091	0.090374	0.0770184	0.0618729	0.0355403	0.0529921	0.445141	0.0522073	0.0774154	0.111759	0.0666352	0.060838	0.0481037	0.0581185	0.0693221	0.0899542	0.365647	Q12792	Twinfilin-1 OS=Homo sapiens OX=9606 GN=TWF1 PE=1 SV=3	unknown	CYTOSOL	0.890242	CYTOSOL
Q8N573	0.0377389	0.0633841	0.0870856	0.123205	0.102365	0.0991794	0.141993	0.0651118	0.0592269	0.220711	0.0344586	0.0484419	0.094187	0.0765082	0.110567	0.100879	0.0655214	0.0349581	0.0542349	0.380244	0.0457456	0.0653245	0.13369	0.0770258	0.079836	0.0760584	0.0644032	0.065647	0.0814944	0.310775	Q8N573	Oxidation resistance protein 1 OS=Homo sapiens OX=9606 GN=OXR1 PE=1 SV=2	unknown	CYTOSOL	0.867187	CYTOSOL
P78417	0.0320047	0.0560123	0.0787883	0.126292	0.0733342	0.106826	0.102908	0.0306932	0.0308052	0.362336	0.0456719	0.0605309	0.10151	0.0892658	0.127765	0.121777	0.109286	0.0450463	0.0472137	0.251933	0.0449272	0.0880671	0.151475	0.0933598	0.0929607	0.0658551	0.0792604	0.0793819	0.0609615	0.243751	P78417	Glutathione S-transferase omega-1 OS=Homo sapiens OX=9606 GN=GSTO1 PE=1 SV=2	unknown	CYTOSOL	0.91609	CYTOSOL
Q9Y5A7	0.0350511	0.0507637	0.062191	0.128777	0.0806505	0.0939457	0.120976	0.087353	0.0894407	0.250852	0.0449977	0.0436427	0.0670167	0.0580397	0.0824864	0.0763889	0.0575881	0.0475949	0.0717028	0.450542	0.034902	0.067451	0.104902	0.0719608	0.0729412	0.0601961	0.0566667	0.082549	0.118431	0.33	Q9Y5A7	NEDD8 ultimate buster 1 OS=Homo sapiens OX=9606 GN=NUB1 PE=1 SV=2	unknown	CYTOSOL	0.873421	CYTOSOL
Q6PGP7	0.0270423	0.0370385	0.0487778	0.0890197	0.0560273	0.0646211	0.130362	0.279352	0.250836	0.016924	0.0477713	0.0419289	0.0740051	0.0770808	0.0847248	0.0643333	0.0755128	0.217831	0.265852	0.05096	0.034194	0.0506458	0.0880909	0.0778694	0.0811269	0.0825754	0.119799	0.245228	0.201603	0.018868	Q6PGP7	Tetratricopeptide repeat protein 37 OS=Homo sapiens OX=9606 GN=TTC37 PE=1 SV=1	unknown	NUCLEUS	0.922799	NUCLEUS
P48556	0.0178245	0.0308831	0.0404944	0.0656108	0.0454986	0.0633867	0.0663256	0.152319	0.353027	0.164631	0.0221909	0.0263935	0.0572081	0.0424142	0.06169	0.0512322	0.0399121	0.085885	0.279652	0.333422	0.0236359	0.0361514	0.0613208	0.037398	0.0386644	0.0364779	0.0376651	0.12282	0.405036	0.200831	P48556	26S proteasome non-ATPase regulatory subunit 8 OS=Homo sapiens OX=9606 GN=PSMD8 PE=1 SV=2	PROTEASOME	PROTEASOME	1	PROTEASOME
Q8IWJ2	0.0908476	0.198114	0.168094	0.134956	0.0776976	0.0680794	0.0902465	0.0598512	0.0488428	0.0632702	0.143019	0.100262	0.134581	0.117729	0.0999551	0.0734123	0.0674088	0.0773831	0.077974	0.108275	0.101473	0.169558	0.240646	0.114935	0.06759	0.0465675	0.042469	0.0569904	0.059923	0.0998481	Q8IWJ2	GRIP and coiled-coil domain-containing protein 2 OS=Homo sapiens OX=9606 GN=GCC2 PE=1 SV=4	unknown	GOLGI	0.358962	unknown
O75449	0.0527097	0.0536234	0.0687568	0.108218	0.0636743	0.0686997	0.13877	0.189652	0.194107	0.0617897	0.101037	0.0420076	0.0691762	0.0648118	0.0813966	0.066994	0.0740862	0.140316	0.193344	0.16683	0.0996119	0.0543338	0.0633894	0.0711514	0.0737387	0.0711514	0.100906	0.164295	0.134541	0.166882	O75449	Katanin p60 ATPase-containing subunit A1 OS=Homo sapiens OX=9606 GN=KATNA1 PE=1 SV=1	unknown	NUCLEUS	0.959197	NUCLEUS
P54578	0.0262483	0.0411331	0.0500698	0.0866448	0.0608251	0.0826079	0.0875077	0.110461	0.229748	0.224755	0.0299922	0.0367983	0.0654497	0.0520258	0.077525	0.0686254	0.0548329	0.0694565	0.159755	0.385539	0.0327769	0.0527729	0.0883383	0.0548601	0.0567994	0.0443581	0.0504555	0.0854293	0.173017	0.361193	P54578	Ubiquitin carboxyl-terminal hydrolase 14 OS=Homo sapiens OX=9606 GN=USP14 PE=1 SV=3	unknown	PROTEASOME	0.303745	unknown
P07305	0.465729	0.115807	0.0359273	0.0664065	0.0468969	0.0402709	0.0693514	0.0739895	0.0553633	0.0302584	0.62591	0.0604788	0.0365366	0.0542473	0.0477534	0.0291243	0.0398819	0.0434241	0.0434241	0.0192194	0.612641	0.19508	0.0500954	0.0246872	0.0251538	0.0190456	0.0220148	0.0206575	0.0159067	0.014719	P07305	Histone H1.0 OS=Homo sapiens OX=9606 GN=H1F0 PE=1 SV=3	NUCLEUS-CHROMATIN	NUCLEUS-CHROMATIN	1	NUCLEUS-CHROMATIN
O14787-2	0.0512985	0.0551312	0.0723379	0.105358	0.0831926	0.098282	0.102946	0.0561765	0.0674868	0.307791	0.0398975	0.0365981	0.0701572	0.0586524	0.0866979	0.0718503	0.0510984	0.0382695	0.0566554	0.490123	0.0444528	0.0613524	0.0866665	0.0586183	0.061871	0.0548471	0.0547057	0.0674335	0.074198	0.435855	O14787-2	Isoform 2 of Transportin-2 OS=Homo sapiens OX=9606 GN=TNPO2	unknown	CYTOSOL	0.903028	CYTOSOL
Q9BWJ5	0.0594052	0.038285	0.04433	0.0845181	0.058435	0.0756372	0.141087	0.258069	0.188216	0.0520169	0.0479506	0.02806	0.0724586	0.0368687	0.0665625	0.0888684	0.0896498	0.188463	0.233075	0.148043	0.0735741	0.0465752	0.0777411	0.0541497	0.0611381	0.0641766	0.077893	0.175276	0.186843	0.182633	Q9BWJ5	Splicing factor 3B subunit 5 OS=Homo sapiens OX=9606 GN=SF3B5 PE=1 SV=1	unknown	NUCLEUS	0.961885	NUCLEUS
D6RIU2	0.108714	0.113235	0.112104	0.188245	0.132963	0.11529	0.155672	0.0579531	0.00873407	0.00709001	0.180316	0.0942883	0.14526	0.177798	0.142541	0.0957993	0.0865317	0.0315302	0.0200463	0.025889	0.160705	0.189013	0.219808	0.143296	0.0886548	0.0564699	0.0585912	0.0420598	0.0179211	0.0234804	D6RIU2	Claudin domain-containing protein 1 (Fragment) OS=Homo sapiens OX=9606 GN=CLDND1 PE=1 SV=1	unknown	PM	0.874128	PM
Q13888	0.120739	0.0490057	0.0298295	0.0795455	0.0610795	0.0383523	0.135653	0.225142	0.240057	0.0205966	0.105564	0.0358814	0.0616225	0.048882	0.0842434	0.0538222	0.0800832	0.210348	0.24077	0.0787832	0.110849	0.0536557	0.0698703	0.0769458	0.0716392	0.0725236	0.100236	0.182193	0.185436	0.0766509	Q13888	General transcription factor IIH subunit 2 OS=Homo sapiens OX=9606 GN=GTF2H2 PE=1 SV=1	unknown	NUCLEUS	0.968314	NUCLEUS
F6U1T9	0.0377121	0.0546826	0.10088	0.192332	0.0392835	0.0722816	0.197046	0.062225	0.0578253	0.185732	0.0567286	0.0708378	0.0966235	0.106597	0.159774	0.138221	0.148195	0.0501119	0.0414518	0.131459	0.047704	0.114281	0.179373	0.110566	0.0914698	0.0794323	0.0815129	0.0905038	0.0582553	0.146901	F6U1T9	Calcineurin subunit B type 1 OS=Homo sapiens OX=9606 GN=PPP3R1 PE=1 SV=1	unknown	CYTOSOL	0.330847	unknown
P84243	0.574802	0.160236	0.0412118	0.0653582	0.0310227	0.0193081	0.0321497	0.0334931	0.0238163	0.0186022	0.711826	0.0708027	0.0255515	0.0535539	0.0376838	0.0175245	0.0179534	0.0230392	0.0237745	0.0182904	0.684892	0.207411	0.00826961	0.0188164	0.0210695	0.0129078	0.0113258	0.0117333	0.011925	0.0116494	P84243	Histone H3.3 OS=Homo sapiens OX=9606 GN=H3F3A PE=1 SV=2	NUCLEUS-CHROMATIN	NUCLEUS-CHROMATIN	1	NUCLEUS-CHROMATIN
Q99961	0.0407032	0.0614507	0.0766154	0.139483	0.0836145	0.0941549	0.143482	0.080365	0.0845728	0.195559	0.0544176	0.0515884	0.0865655	0.0764501	0.108977	0.0903904	0.078331	0.0525684	0.0718666	0.328845	0.0470934	0.0733826	0.140227	0.0796986	0.0776625	0.0685486	0.0602657	0.0742413	0.0715681	0.307312	Q99961	Endophilin-A2 OS=Homo sapiens OX=9606 GN=SH3GL1 PE=1 SV=1	unknown	CYTOSOL	0.856937	unknown
Q86UL3	0.0463592	0.103762	0.197816	0.249515	0.10801	0.120024	0.101578	0.0273058	0.0224515	0.0231796	0.056696	0.042522	0.187195	0.155914	0.117791	0.0703812	0.0694037	0.0601173	0.0654936	0.174487	0.0654669	0.105112	0.254825	0.157538	0.142671	0.0886802	0.0899844	0.0440793	0.0234742	0.028169	Q86UL3	Glycerol-3-phosphate acyltransferase 4 OS=Homo sapiens OX=9606 GN=GPAT4 PE=1 SV=1	unknown	ER	0.43231	unknown
H0Y9X1	0.0409945	0.0503908	0.0669383	0.112839	0.066772	0.0814901	0.136454	0.238982	0.165475	0.0396641	0.056783	0.0548412	0.106481	0.108423	0.117397	0.077355	0.089058	0.153975	0.166938	0.0687484	0.0482473	0.0699027	0.10434	0.0945847	0.093997	0.0772486	0.102694	0.190198	0.188611	0.0301766	H0Y9X1	Translation machinery-associated protein 16 (Fragment) OS=Homo sapiens OX=9606 GN=TMA16 PE=1 SV=1	unknown	NUCLEUS	0.504656	unknown
Q96QD8	0.0878078	0.130508	0.150813	0.198419	0.115109	0.10457	0.14091	0.0502408	0.0122195	0.00940311	0.124718	0.0885584	0.168235	0.202186	0.156672	0.0878751	0.10648	0.0322699	0.0126137	0.0203921	0.103612	0.186217	0.21904	0.15728	0.109533	0.0668239	0.0605541	0.0566154	0.0269814	0.0133433	Q96QD8	Sodium-coupled neutral amino acid transporter 2 OS=Homo sapiens OX=9606 GN=SLC38A2 PE=1 SV=2	unknown	PM	0.576637	unknown
Q06481	0.0687159	0.118605	0.170298	0.260615	0.138857	0.0853392	0.0935464	0.0333986	0.0141915	0.0164333	0.087108	0.0913733	0.191277	0.229004	0.172173	0.101586	0.0711883	0.0191638	0.0151388	0.0219873	0.0674111	0.13244	0.243917	0.166759	0.123439	0.0829342	0.0745108	0.048254	0.0254386	0.0348969	Q06481	Amyloid-like protein 2 OS=Homo sapiens OX=9606 GN=APLP2 PE=1 SV=2	unknown	ER	0.853022	unknown
Q92620	0.0384286	0.0400957	0.0435602	0.0836124	0.0506777	0.0663188	0.120997	0.210104	0.258418	0.0877872	0.05312	0.0299091	0.0527479	0.0554225	0.0653999	0.0571435	0.0784706	0.215806	0.267926	0.124055	0.0552762	0.0565002	0.0830963	0.0618922	0.0628515	0.0560701	0.0677142	0.108601	0.178366	0.269633	Q92620	Pre-mRNA-splicing factor ATP-dependent RNA helicase PRP16 OS=Homo sapiens OX=9606 GN=DHX38 PE=1 SV=2	unknown	NUCLEUS	0.86203	unknown
P46926	0.0260796	0.0501336	0.0669855	0.123759	0.0778731	0.107244	0.101477	0.0386552	0.0473203	0.360473	0.0405819	0.0486291	0.0900903	0.069333	0.109609	0.0921154	0.0718777	0.0435397	0.054278	0.379946	0.0403123	0.0763226	0.0908232	0.0720626	0.0731329	0.0615281	0.0633748	0.0630181	0.0691667	0.390259	P46926	Glucosamine-6-phosphate isomerase 1 OS=Homo sapiens OX=9606 GN=GNPDA1 PE=1 SV=1	unknown	CYTOSOL	0.94304	CYTOSOL
A0A1B0GVH5	0.0391651	0.0531526	0.0753604	0.106262	0.0862492	0.118829	0.110265	0.0578438	0.0613729	0.2915	0.0443755	0.0547487	0.0857767	0.0733655	0.11954	0.115611	0.0891916	0.0476435	0.0498467	0.3199	0.0420982	0.0625201	0.113269	0.0703351	0.0730366	0.0622628	0.0595935	0.0699492	0.066701	0.380234	A0A1B0GVH5	Alpha-ketoglutarate-dependent dioxygenase FTO OS=Homo sapiens OX=9606 GN=FTO PE=1 SV=1	unknown	CYTOSOL	0.912534	CYTOSOL
Q8NHU6	0.0303347	0.0406555	0.045258	0.0959554	0.0557183	0.082636	0.168828	0.230056	0.228661	0.0218968	0.0499361	0.0386002	0.0667364	0.0762702	0.0803395	0.0699919	0.0836531	0.189862	0.217882	0.126729	0.0461092	0.0581882	0.087921	0.0756098	0.0892373	0.0888889	0.123926	0.200813	0.163647	0.0656601	Q8NHU6	Tudor domain-containing protein 7 OS=Homo sapiens OX=9606 GN=TDRD7 PE=1 SV=2	unknown	NUCLEUS	0.771484	unknown
Q96EB6	0.0414655	0.0475717	0.0702925	0.100398	0.0859131	0.0940074	0.0812269	0.0670264	0.0695825	0.342516	0.0320849	0.0369786	0.0708	0.0602234	0.0906508	0.0789297	0.0642093	0.0384388	0.0447926	0.482892	0.0407048	0.0572205	0.102536	0.0622415	0.0689993	0.0603152	0.0621467	0.0646414	0.0624309	0.418764	Q96EB6	NAD-dependent protein deacetylase sirtuin-1 OS=Homo sapiens OX=9606 GN=SIRT1 PE=1 SV=2	unknown	CYTOSOL	0.92132	CYTOSOL
Q99569	0.182861	0.136383	0.113145	0.175163	0.106899	0.0868555	0.122876	0.0557734	0.0127814	0.00726216	0.276423	0.097561	0.110745	0.142386	0.0947045	0.0674577	0.0665788	0.0481213	0.045924	0.0500989	0.214902	0.222049	0.207919	0.111394	0.062269	0.0350776	0.0468249	0.0408281	0.0281771	0.0305594	Q99569	Plakophilin-4 OS=Homo sapiens OX=9606 GN=PKP4 PE=1 SV=2	unknown	PM	0.57009	unknown
Q9NP77	0.0591001	0.0604433	0.0613387	0.117529	0.0682785	0.0946944	0.118424	0.0660398	0.0490262	0.305126	0.0460661	0.0391841	0.0651001	0.0506541	0.0866762	0.0765082	0.0509021	0.0360841	0.0375721	0.511253	0.0572687	0.0657404	0.0850559	0.0640461	0.0704846	0.0403253	0.0701457	0.0816672	0.0860725	0.379193	Q9NP77	RNA polymerase II subunit A C-terminal domain phosphatase SSU72 OS=Homo sapiens OX=9606 GN=SSU72 PE=1 SV=1	unknown	CYTOSOL	0.893377	CYTOSOL
O14976	0.041076	0.0575427	0.0664601	0.11797	0.0894541	0.0914321	0.198803	0.144063	0.108525	0.084674	0.0589925	0.0505994	0.0795281	0.0826755	0.103211	0.0922897	0.103228	0.104793	0.12557	0.199113	0.0481389	0.0675996	0.12276	0.0768491	0.0793017	0.0745888	0.0775865	0.114152	0.116444	0.22258	O14976	Cyclin-G-associated kinase OS=Homo sapiens OX=9606 GN=GAK PE=1 SV=2	unknown	NUCLEUS	0.62984	unknown
J3KQN4	0.0253726	0.0485799	0.0715216	0.123741	0.0877813	0.0939717	0.186004	0.206302	0.150615	0.00611068	0.0490189	0.0448087	0.0922487	0.114578	0.100744	0.079994	0.102398	0.181039	0.193068	0.0421021	0.0307446	0.0535129	0.106998	0.0999918	0.10469	0.0939685	0.151087	0.215854	0.136377	0.00677448	J3KQN4	60S ribosomal protein L36a OS=Homo sapiens OX=9606 GN=RPL36A PE=1 SV=1	unknown	RIBOSOME	0.913984	RIBOSOME
O60911	0.0596861	0.161416	0.158896	0.311147	0.0822546	0.0475427	0.0770993	0.039638	0.0371177	0.0252033	0.0684872	0.0953619	0.208062	0.227135	0.184655	0.0827915	0.0702211	0.0203728	0.0216732	0.0212397	0.0564223	0.147166	0.24649	0.202288	0.117525	0.0673427	0.0733229	0.0460218	0.0213209	0.0221009	O60911	Cathepsin L2 OS=Homo sapiens OX=9606 GN=CTSV PE=1 SV=2	unknown	ER	0.717823	unknown
Q9UKV8	0.0250863	0.0402212	0.0584248	0.116988	0.0836324	0.0957334	0.238189	0.201089	0.107228	0.0334079	0.0511758	0.0436488	0.102483	0.110168	0.123103	0.0996539	0.142868	0.16041	0.126525	0.0399642	0.0347433	0.0484247	0.0979434	0.0907089	0.11021	0.12554	0.18734	0.194093	0.0903005	0.0206972	Q9UKV8	Protein argonaute-2 OS=Homo sapiens OX=9606 GN=AGO2 PE=1 SV=3	unknown	RIBOSOME	0.554985	unknown
Q86VP6	0.0650827	0.0547988	0.064687	0.0924613	0.0726433	0.0844789	0.112956	0.14838	0.139574	0.164938	0.0656446	0.0388034	0.0750359	0.0661238	0.0808036	0.0644135	0.062871	0.093892	0.127159	0.325254	0.0715817	0.0675481	0.101545	0.0608272	0.0606947	0.0490286	0.0562795	0.0758777	0.103326	0.353292	Q86VP6	Cullin-associated NEDD8-dissociated protein 1 OS=Homo sapiens OX=9606 GN=CAND1 PE=1 SV=2	unknown	CYTOSOL	0.462263	unknown
J3KNR0	0.0497706	0.0531634	0.0510887	0.0893868	0.0631224	0.0565319	0.114065	0.263864	0.236819	0.022188	0.0994162	0.0443334	0.0789083	0.0833674	0.0728765	0.0628164	0.0825488	0.206071	0.218866	0.050796	0.0386399	0.0465467	0.0820854	0.0630308	0.069373	0.0696105	0.122499	0.212687	0.249818	0.0457085	J3KNR0	Non-specific serine/threonine protein kinase OS=Homo sapiens OX=9606 GN=MARK3 PE=1 SV=2	unknown	NUCLEUS	0.959642	NUCLEUS
Q9P003	0.0584326	0.102217	0.155546	0.249149	0.160091	0.0936304	0.110618	0.0471874	0.0144088	0.00871969	0.0746934	0.077361	0.233238	0.22991	0.167373	0.0917441	0.0645729	0.0296738	0.0147682	0.0166657	0.0755359	0.109944	0.224566	0.158813	0.139418	0.10182	0.0949728	0.0659238	0.0183736	0.0106329	Q9P003	Protein cornichon homolog 4 OS=Homo sapiens OX=9606 GN=CNIH4 PE=1 SV=1	unknown	ER	0.851986	unknown
Q92890-1	0.0558202	0.075047	0.0928692	0.179684	0.111223	0.0915406	0.114943	0.11426	0.0875738	0.0770399	0.0694149	0.0659997	0.139783	0.151031	0.132349	0.0888806	0.0621259	0.0757024	0.101504	0.11321	0.0689458	0.0870386	0.165671	0.1314	0.110628	0.0890182	0.0771221	0.0814588	0.0871583	0.101559	Q92890-1	Isoform Long of Ubiquitin recognition factor in ER-associated degradation protein 1 OS=Homo sapiens OX=9606 GN=UFD1	unknown	NUCLEUS	0.23019	unknown
Q13561	0.061955	0.0753328	0.070895	0.100297	0.080763	0.0805057	0.126069	0.153275	0.137279	0.113629	0.0815367	0.0515397	0.0840386	0.0770535	0.0977903	0.0725284	0.100334	0.114413	0.112247	0.208518	0.0478736	0.0484809	0.0906151	0.0684401	0.0772817	0.077971	0.118623	0.158798	0.167618	0.144299	Q13561	Dynactin subunit 2 OS=Homo sapiens OX=9606 GN=DCTN2 PE=1 SV=4	unknown	NUCLEUS	0.840777	unknown
Q8IWZ3-6	0.0258326	0.0354743	0.0425464	0.0808064	0.0624893	0.060727	0.131539	0.280804	0.232664	0.0471171	0.0455465	0.0359143	0.0692304	0.0723548	0.0829259	0.0674254	0.0891585	0.197233	0.23556	0.104651	0.0393798	0.0463101	0.0821758	0.0731415	0.0848152	0.0960439	0.13786	0.210843	0.18512	0.0443117	Q8IWZ3-6	Isoform 6 of Ankyrin repeat and KH domain-containing protein 1 OS=Homo sapiens OX=9606 GN=ANKHD1	unknown	NUCLEUS	0.829675	unknown
P62820	0.0647063	0.129447	0.120171	0.210478	0.0995651	0.106445	0.142408	0.06226	0.0322937	0.0322257	0.0939522	0.0873632	0.166976	0.199862	0.143105	0.0777591	0.0815096	0.0423285	0.026709	0.0804359	0.0774657	0.151157	0.208948	0.1462	0.108554	0.0685562	0.0771988	0.077758	0.0357143	0.0484494	P62820	Ras-related protein Rab-1A OS=Homo sapiens OX=9606 GN=RAB1A PE=1 SV=3	unknown	PM	0.371563	unknown
P48059	0.0939899	0.0656541	0.0810877	0.124041	0.0725951	0.0713702	0.126654	0.180875	0.150906	0.032827	0.143329	0.0525156	0.0950632	0.091758	0.091758	0.0561356	0.0697235	0.144851	0.186192	0.0686743	0.189168	0.143292	0.147606	0.0988791	0.0651747	0.0550826	0.0743038	0.0969916	0.0790802	0.0504218	P48059	LIM and senescent cell antigen-like-containing domain protein 1 OS=Homo sapiens OX=9606 GN=LIMS1 PE=1 SV=4	unknown	NUCLEUS	0.572564	unknown
Q5VIR6-4	0.0600429	0.058817	0.0625226	0.117773	0.0718007	0.0694882	0.159929	0.228776	0.157644	0.0132067	0.102358	0.0512223	0.090294	0.0941234	0.100055	0.0703118	0.0962541	0.16432	0.176672	0.0543895	0.0617119	0.0626882	0.101617	0.0880719	0.0971047	0.101035	0.141375	0.183897	0.13057	0.0319307	Q5VIR6-4	Isoform 4 of Vacuolar protein sorting-associated protein 53 homolog OS=Homo sapiens OX=9606 GN=VPS53	unknown	RIBOSOME	0.823309	RIBOSOME
P11388	0.276354	0.0870545	0.0561989	0.0915103	0.0582594	0.051796	0.100034	0.151355	0.110654	0.0167839	0.319976	0.0604554	0.0769899	0.0841522	0.0697289	0.0506294	0.0603173	0.114834	0.121365	0.0415532	0.359054	0.136924	0.0654391	0.0536753	0.0571377	0.0497736	0.0705184	0.0924701	0.0972038	0.0178039	P11388	DNA topoisomerase 2-alpha OS=Homo sapiens OX=9606 GN=TOP2A PE=1 SV=3	NUCLEUS-CHROMATIN	NUCLEUS-CHROMATIN	1	NUCLEUS-CHROMATIN
Q99717	0.0521217	0.0470675	0.0623881	0.116458	0.0621249	0.0693377	0.125777	0.181057	0.212962	0.0707065	0.0803811	0.0365003	0.0724638	0.0735373	0.078234	0.0590446	0.0708535	0.146404	0.20424	0.178341	0.0938389	0.0559242	0.0843602	0.0578199	0.0862559	0.050237	0.0853081	0.125118	0.183886	0.177251	Q99717	Mothers against decapentaplegic homolog 5 OS=Homo sapiens OX=9606 GN=SMAD5 PE=1 SV=1	unknown	NUCLEUS	0.931769	NUCLEUS
P13010	0.0468734	0.0375837	0.0482874	0.0848863	0.0654906	0.0796955	0.143183	0.24147	0.186652	0.0658778	0.0506604	0.0352678	0.0691483	0.0702034	0.087338	0.0697289	0.0871098	0.159787	0.178031	0.192725	0.0474266	0.0490744	0.0781194	0.0676325	0.0788543	0.0788256	0.128447	0.202352	0.15588	0.113388	P13010	X-ray repair cross-complementing protein 5 OS=Homo sapiens OX=9606 GN=XRCC5 PE=1 SV=3	unknown	NUCLEUS	0.914083	NUCLEUS
P21283	0.0474929	0.0890335	0.105794	0.157533	0.0800427	0.0781697	0.110914	0.127702	0.118961	0.0843577	0.0578075	0.0826472	0.135182	0.11078	0.102319	0.0708055	0.0769366	0.0992538	0.115492	0.148776	0.0593782	0.0958577	0.13978	0.0948503	0.0807193	0.0655157	0.0767365	0.121974	0.115109	0.150078	P21283	V-type proton ATPase subunit C 1 OS=Homo sapiens OX=9606 GN=ATP6V1C1 PE=1 SV=4	unknown	NUCLEUS	0.546708	unknown
P05026	0.12343	0.127117	0.134492	0.177287	0.114312	0.113621	0.151605	0.0411673	0.00802316	0.00894503	0.235902	0.101654	0.171388	0.173488	0.123269	0.0718014	0.0669435	0.0207116	0.0118493	0.0229928	0.227682	0.220718	0.232096	0.120641	0.0724666	0.0431563	0.0426332	0.0228532	0.0101188	0.00763409	P05026	Sodium/potassium-transporting ATPase subunit beta-1 OS=Homo sapiens OX=9606 GN=ATP1B1 PE=1 SV=1	PM	PM	1	PM
A0A0C4DGG1	0.0997822	0.0960015	0.104185	0.151396	0.0941112	0.0963365	0.137374	0.105501	0.084779	0.0305329	0.148079	0.0644799	0.122745	0.096417	0.0951337	0.089597	0.0793598	0.0986374	0.0947877	0.110763	0.158358	0.132459	0.170053	0.101085	0.0796912	0.0722892	0.0769883	0.0932763	0.0667244	0.0490761	A0A0C4DGG1	Protein kinase C and casein kinase substrate in neurons protein 3 (Fragment) OS=Homo sapiens OX=9606 GN=PACSIN3 PE=1 SV=1	unknown	NUCLEUS	0.270356	unknown
Q96KG9	0.0896833	0.0771495	0.0736837	0.106775	0.0783839	0.0644258	0.124531	0.189859	0.13227	0.0632389	0.115983	0.0608325	0.0805336	0.0818923	0.0841156	0.0615119	0.0663291	0.137599	0.159894	0.151309	0.076733	0.0730442	0.106393	0.0736247	0.0732876	0.0745422	0.0823128	0.119406	0.142456	0.178201	Q96KG9	N-terminal kinase-like protein OS=Homo sapiens OX=9606 GN=SCYL1 PE=1 SV=1	unknown	NUCLEUS	0.888443	NUCLEUS
Q8WYA6	0.0651348	0.0455714	0.05683	0.0974721	0.0744563	0.0827036	0.119529	0.149258	0.140262	0.168783	0.0544699	0.0359335	0.0661692	0.0610624	0.0858368	0.0738505	0.0596359	0.0806625	0.110679	0.371701	0.0773379	0.0538773	0.089923	0.0593432	0.0659113	0.0669235	0.0794973	0.123477	0.111325	0.272384	Q8WYA6	Beta-catenin-like protein 1 OS=Homo sapiens OX=9606 GN=CTNNBL1 PE=1 SV=1	unknown	CYTOSOL	0.459371	unknown
Q9NZM1	0.112108	0.114807	0.118936	0.176736	0.125639	0.116566	0.163965	0.0473121	0.0106316	0.0132998	0.187139	0.0835264	0.147674	0.169601	0.148566	0.103297	0.107397	0.02721	0.0102778	0.015313	0.143629	0.167244	0.190707	0.13122	0.113718	0.0899194	0.0908244	0.0471722	0.0138158	0.0117506	Q9NZM1	Myoferlin OS=Homo sapiens OX=9606 GN=MYOF PE=1 SV=1	unknown	PM	0.701157	PM
Q5TBB1	0.0485196	0.0481428	0.0519664	0.10075	0.0704814	0.0752279	0.112823	0.145351	0.10738	0.239358	0.0498431	0.0370644	0.0642627	0.0552171	0.0788259	0.0712366	0.0639345	0.0792567	0.0951121	0.405247	0.0547887	0.0515527	0.0862645	0.0551454	0.0624629	0.0611684	0.0736636	0.101652	0.116855	0.336446	Q5TBB1	Ribonuclease H2 subunit B OS=Homo sapiens OX=9606 GN=RNASEH2B PE=1 SV=1	unknown	CYTOSOL	0.723393	unknown
X6RM59	0.146415	0.204103	0.124385	0.136498	0.0589749	0.0694224	0.0770687	0.0332349	0.0298281	0.12007	0.192221	0.131985	0.153451	0.108386	0.0788278	0.048932	0.0423401	0.0261985	0.0241491	0.19351	0.103125	0.181743	0.142105	0.0876645	0.0659539	0.0552632	0.0476974	0.0555921	0.0552632	0.205592	X6RM59	5'-nucleotidase OS=Homo sapiens OX=9606 GN=NT5C3A PE=1 SV=1	unknown	NUCLEUS-CHROMATIN	0.459069	unknown
Q96IK1	0.0737077	0.0807836	0.0811767	0.117998	0.102929	0.0686628	0.128481	0.119898	0.0792767	0.147088	0.0844577	0.0917989	0.107341	0.0832011	0.1	0.0945106	0.087963	0.0500661	0.0554894	0.245172	0.0790986	0.0939127	0.144999	0.0859221	0.0842162	0.0844855	0.0684144	0.0707488	0.0808045	0.207398	Q96IK1	Biorientation of chromosomes in cell division protein 1 OS=Homo sapiens OX=9606 GN=BOD1 PE=1 SV=2	unknown	CYTOSOL	0.487972	unknown
F8VUA2	0.079619	0.0834046	0.0849921	0.131274	0.0812065	0.0705825	0.130175	0.146172	0.129564	0.0630114	0.0886818	0.0688411	0.114535	0.0977754	0.0992034	0.0761311	0.0846986	0.103111	0.127687	0.139336	0.113206	0.0943558	0.133041	0.089472	0.0813323	0.0769198	0.0794688	0.110507	0.107315	0.114384	F8VUA2	Charged multivesicular body protein 1a OS=Homo sapiens OX=9606 GN=CHMP1A PE=1 SV=1	unknown	NUCLEUS	0.718133	unknown
Q8WVV9	0.0620098	0.040077	0.0443984	0.0903359	0.0675448	0.0714518	0.172503	0.242622	0.182329	0.0267278	0.0719382	0.0388378	0.0742185	0.0738139	0.0851784	0.0884884	0.113167	0.197683	0.186723	0.0699522	0.0733229	0.0637397	0.0948171	0.0827576	0.0936037	0.0901369	0.14303	0.193448	0.113315	0.0518287	Q8WVV9	Heterogeneous nuclear ribonucleoprotein L-like OS=Homo sapiens OX=9606 GN=HNRNPLL PE=1 SV=1	unknown	NUCLEUS	0.488681	unknown
Q9H444	0.0383846	0.0619843	0.0933912	0.137909	0.0795692	0.0940875	0.160827	0.0945764	0.102013	0.137257	0.044539	0.0537165	0.0827378	0.0939996	0.0955233	0.103335	0.0962764	0.0759072	0.0842616	0.269704	0.0497805	0.08046	0.156228	0.0975094	0.0813665	0.072969	0.0799033	0.081621	0.0712036	0.228959	Q9H444	Charged multivesicular body protein 4b OS=Homo sapiens OX=9606 GN=CHMP4B PE=1 SV=1	unknown	CYTOSOL	0.605781	unknown
P05121	0.0673599	0.122885	0.16063	0.262632	0.120472	0.0912877	0.10183	0.0455864	0.0138167	0.0135007	0.0818478	0.0924647	0.237801	0.200246	0.175529	0.0780451	0.0705007	0.0213556	0.0166251	0.0255841	0.0686439	0.124865	0.238475	0.195367	0.116884	0.0862517	0.0787485	0.0460281	0.0205631	0.0241731	P05121	Plasminogen activator inhibitor 1 OS=Homo sapiens OX=9606 GN=SERPINE1 PE=1 SV=1	unknown	ER	0.840368	unknown
P08621	0.0956377	0.0320498	0.0321049	0.0726809	0.0499288	0.0616591	0.153203	0.255981	0.230049	0.0167059	0.0638173	0.028478	0.0511279	0.0562931	0.063694	0.0615662	0.110397	0.239635	0.243335	0.0816566	0.153222	0.058805	0.0647434	0.0554572	0.0651904	0.0647845	0.10857	0.214166	0.179216	0.0358449	P08621	U1 small nuclear ribonucleoprotein 70 kDa OS=Homo sapiens OX=9606 GN=SNRNP70 PE=1 SV=2	unknown	NUCLEUS	0.977763	NUCLEUS
A0A1B0GUI1	0.0346494	0.0418506	0.0521591	0.0929986	0.0604207	0.0841944	0.178673	0.236726	0.204	0.0143283	0.0597432	0.0375688	0.0728244	0.0765733	0.0955572	0.0805615	0.116854	0.200845	0.207147	0.0523251	0.0508902	0.0587	0.0848169	0.0700369	0.088176	0.0951881	0.149857	0.216409	0.155442	0.0304837	A0A1B0GUI1	Ral GTPase-activating protein subunit alpha-1 OS=Homo sapiens OX=9606 GN=RALGAPA1 PE=1 SV=1	unknown	RIBOSOME	0.768677	RIBOSOME
Q7Z2K8	0.125888	0.11509	0.119982	0.163083	0.12635	0.0937702	0.13761	0.0575911	0.015413	0.0452238	0.207318	0.0756769	0.128469	0.134021	0.103093	0.0908576	0.0791889	0.0489407	0.0370454	0.0953891	0.197946	0.196858	0.198555	0.116226	0.0799356	0.056525	0.0589618	0.042818	0.0183195	0.0338541	Q7Z2K8	G protein-regulated inducer of neurite outgrowth 1 OS=Homo sapiens OX=9606 GN=GPRIN1 PE=1 SV=2	PM	PM	1	PM
P15531	0.0281517	0.0472063	0.0602987	0.0917082	0.0724076	0.108243	0.108734	0.0995759	0.0972401	0.286434	0.0295771	0.0346379	0.0679262	0.0455466	0.0635403	0.0980657	0.0652272	0.127755	0.0970535	0.37067	0.0349712	0.0632446	0.106709	0.0555777	0.0591119	0.050989	0.0513025	0.0647267	0.0569458	0.456421	P15531	Nucleoside diphosphate kinase A OS=Homo sapiens OX=9606 GN=NME1 PE=1 SV=1	unknown	CYTOSOL	0.805497	unknown
Q12899	0.213333	0.0795699	0.0490323	0.117419	0.0941935	0.0464516	0.0752688	0.164731	0.0623656	0.0976344	0.0879463	0.0605044	0.112649	0.111704	0.0976289	0.0679199	0.0613546	0.0914415	0.106934	0.201918	0.0688312	0.112987	0.138961	0.114719	0.0844156	0.0519481	0.0753247	0.0831169	0.0939394	0.175758	Q12899	Tripartite motif-containing protein 26 OS=Homo sapiens OX=9606 GN=TRIM26 PE=1 SV=1	unknown	NUCLEUS-CHROMATIN	0.378549	unknown
P26196	0.0266269	0.0381061	0.0504171	0.105554	0.0641786	0.073602	0.167647	0.240812	0.203237	0.0298188	0.0464924	0.0372186	0.0819843	0.089058	0.0967365	0.0732317	0.104339	0.194491	0.208508	0.0679403	0.0376466	0.0579545	0.0994673	0.0831761	0.0905017	0.0935767	0.138427	0.211731	0.14632	0.0411989	P26196	Probable ATP-dependent RNA helicase DDX6 OS=Homo sapiens OX=9606 GN=DDX6 PE=1 SV=2	unknown	RIBOSOME	0.751908	RIBOSOME
Q9NQT5	0.0704609	0.0317798	0.0330579	0.074295	0.0449859	0.0568288	0.108375	0.259095	0.251512	0.0696089	0.0717907	0.0268813	0.0515493	0.0482293	0.0693988	0.0586891	0.0774311	0.198736	0.238184	0.15911	0.0775306	0.0534333	0.0688803	0.0516334	0.0536213	0.0472545	0.0660058	0.190979	0.236004	0.154658	Q9NQT5	Exosome complex component RRP40 OS=Homo sapiens OX=9606 GN=EXOSC3 PE=1 SV=3	unknown	NUCLEUS	0.947619	NUCLEUS
Q9NRL3	0.0395073	0.0625241	0.0843276	0.144793	0.095597	0.0836842	0.109771	0.121132	0.110966	0.147697	0.0497866	0.0471124	0.0949075	0.10239	0.10643	0.085633	0.0795448	0.0882504	0.099431	0.246515	0.0586147	0.0720478	0.139509	0.0858064	0.0809391	0.0787792	0.0708643	0.091591	0.112895	0.208953	Q9NRL3	Striatin-4 OS=Homo sapiens OX=9606 GN=STRN4 PE=1 SV=2	unknown	CYTOSOL	0.483811	unknown
O75695	0.109511	0.0996056	0.123361	0.155645	0.140237	0.121159	0.15537	0.0685133	0.0135742	0.0130239	0.193284	0.0814983	0.145951	0.183408	0.14083	0.0885946	0.0961299	0.0228254	0.0106811	0.0367986	0.20831	0.209023	0.214325	0.122279	0.0789869	0.0540562	0.0447171	0.0337159	0.00989315	0.0246933	O75695	Protein XRP2 OS=Homo sapiens OX=9606 GN=RP2 PE=1 SV=4	unknown	PM	0.857637	PM
A0A0J9YWL0	0.0938496	0.0817886	0.0625321	0.0967963	0.0704814	0.0690423	0.135892	0.186363	0.153641	0.0496145	0.166754	0.0572796	0.0904434	0.098669	0.0839752	0.0743289	0.0889853	0.115681	0.136394	0.0874897	0.0944164	0.0888211	0.0938295	0.0624095	0.065305	0.0776304	0.109168	0.169425	0.178307	0.0606879	A0A0J9YWL0	Beta/gamma crystallin domain-containing protein 1 OS=Homo sapiens OX=9606 GN=CRYBG1 PE=1 SV=1	unknown	NUCLEUS	0.924412	NUCLEUS
Q9NR33	0.0959525	0.0689463	0.0591068	0.112073	0.0731333	0.0617585	0.100488	0.0849267	0.0849965	0.258618	0.051133	0.0376355	0.0710345	0.0628571	0.0828571	0.082266	0.0673892	0.0450246	0.0419704	0.457833	0.0423185	0.0613718	0.0986262	0.0598676	0.0709487	0.0559065	0.0552547	0.0526976	0.060369	0.442639	Q9NR33	DNA polymerase epsilon subunit 4 OS=Homo sapiens OX=9606 GN=POLE4 PE=1 SV=2	unknown	CYTOSOL	0.818345	unknown
Q5VTR2	0.0607821	0.0382154	0.0399541	0.0809441	0.0523843	0.0625578	0.133587	0.251452	0.223484	0.0566387	0.063964	0.0352795	0.0630998	0.0662836	0.0743189	0.0665717	0.0825664	0.204066	0.2195	0.12435	0.08374	0.0559677	0.082801	0.0697877	0.0851815	0.0856841	0.114528	0.187542	0.146161	0.0886068	Q5VTR2	E3 ubiquitin-protein ligase BRE1A OS=Homo sapiens OX=9606 GN=RNF20 PE=1 SV=2	NUCLEUS	NUCLEUS	1	NUCLEUS
K4DIA8	0.323461	0.460971	0.141253	0.0317076	0.00704613	0.00407354	0.0110096	0.00473412	0.00748651	0.00825718	0.482785	0.298787	0.156699	0.0297109	0.00968227	0.00353036	0.0034255	0.00384494	0.00164284	0.00989199	0.377677	0.355317	0.167846	0.0264176	0.0116049	0.0111331	0.0113218	0.0137749	0.0112275	0.0136805	K4DIA8	Mitochondrial glutamate carrier 1 (Fragment) OS=Homo sapiens OX=9606 GN=SLC25A22 PE=1 SV=2	unknown	MITOCHONDRIA	0.948303	unknown
Q9NV35	0.0250621	0.0466272	0.0550017	0.117151	0.0796957	0.101598	0.0994202	0.0344489	0.0353999	0.405595	0.035143	0.0401997	0.0848838	0.0613491	0.0968737	0.0823395	0.0628439	0.0301816	0.0419807	0.464205	0.0390993	0.059273	0.105454	0.0637816	0.0688505	0.0577192	0.06424	0.0665325	0.0552485	0.419802	Q9NV35	Nucleotide triphosphate diphosphatase NUDT15 OS=Homo sapiens OX=9606 GN=NUDT15 PE=1 SV=1	unknown	CYTOSOL	0.931576	CYTOSOL
O00629	0.0627005	0.0574346	0.065157	0.123236	0.0721732	0.100223	0.117725	0.0644201	0.0751056	0.261825	0.0596805	0.0464518	0.0750059	0.0677647	0.0945896	0.083436	0.069494	0.0392538	0.0496941	0.414629	0.0553153	0.0802156	0.106683	0.0762884	0.0735518	0.060663	0.0561509	0.0767688	0.0815943	0.332769	O00629	Importin subunit alpha-3 OS=Homo sapiens OX=9606 GN=KPNA4 PE=1 SV=1	unknown	CYTOSOL	0.922406	CYTOSOL
O60333-3	0.0295303	0.0418746	0.0537754	0.0956499	0.0647152	0.0772813	0.151162	0.219573	0.185239	0.081199	0.0423476	0.0472676	0.0868037	0.0945352	0.0774908	0.0521877	0.0910209	0.141803	0.126164	0.24038	0.0426824	0.0600462	0.0907536	0.0780087	0.0794628	0.0644085	0.105209	0.157643	0.170644	0.151142	O60333-3	Isoform 3 of Kinesin-like protein KIF1B OS=Homo sapiens OX=9606 GN=KIF1B	unknown	NUCLEUS	0.918298	NUCLEUS
Q12986	0.0258178	0.0361606	0.0454848	0.0791773	0.0536729	0.0636239	0.132184	0.28858	0.243134	0.0321645	0.0396538	0.0383671	0.0721722	0.0906539	0.0869107	0.0734589	0.0962686	0.224003	0.216283	0.0622295	0.0381589	0.0394952	0.0941351	0.081663	0.0910171	0.105419	0.151151	0.213512	0.164068	0.0213808	Q12986	Transcriptional repressor NF-X1 OS=Homo sapiens OX=9606 GN=NFX1 PE=1 SV=2	unknown	NUCLEUS	0.494027	unknown
Q9HCE5	0.0426887	0.059434	0.0773585	0.117689	0.0674528	0.0544811	0.130896	0.14717	0.145283	0.157547	0.0591325	0.0344798	0.0656557	0.069468	0.0682819	0.0646391	0.0684514	0.0971705	0.134022	0.338699	0.0496689	0.0629139	0.113135	0.0386313	0.0706402	0.0816777	0.0375276	0.0866446	0.11479	0.344371	Q9HCE5	N6-adenosine-methyltransferase non-catalytic subunit OS=Homo sapiens OX=9606 GN=METTL14 PE=1 SV=2	unknown	NUCLEUS	0.352165	unknown
O00159	0.168962	0.149874	0.148552	0.206065	0.108225	0.0743238	0.0858028	0.0290906	0.0179714	0.0111339	0.286778	0.110865	0.178575	0.174105	0.111072	0.0501729	0.0353109	0.0155875	0.0167934	0.0207409	0.240328	0.224702	0.226185	0.114758	0.0606903	0.0360385	0.033092	0.0248	0.0176296	0.0217775	O00159	Unconventional myosin-Ic OS=Homo sapiens OX=9606 GN=MYO1C PE=1 SV=4	unknown	PM	0.312871	unknown
Q9Y6R9	0.0438226	0.0723337	0.115452	0.185322	0.135516	0.140795	0.222457	0.0645899	0.0161915	0.00351989	0.0717703	0.0595428	0.126661	0.171717	0.206672	0.142344	0.135167	0.0453216	0.021664	0.0191388	0.0487382	0.0485456	0.118667	0.124831	0.133886	0.146407	0.181083	0.106916	0.0514352	0.0394914	Q9Y6R9	Coiled-coil domain-containing protein 61 OS=Homo sapiens OX=9606 GN=CCDC61 PE=1 SV=3	unknown	NUCLEUS	0.260448	unknown
P05388	0.0313208	0.0470588	0.0646737	0.116918	0.0799344	0.073768	0.161611	0.248066	0.16718	0.00946915	0.0524147	0.0486995	0.106842	0.10533	0.104898	0.0676452	0.0983941	0.18015	0.196042	0.0395835	0.0395693	0.0533278	0.098507	0.0889155	0.0973816	0.0985656	0.157362	0.208827	0.14299	0.0145544	P05388	60S acidic ribosomal protein P0 OS=Homo sapiens OX=9606 GN=RPLP0 PE=1 SV=1	RIBOSOME	RIBOSOME	1	RIBOSOME
A0A0A0MRJ3	0.0565126	0.0682236	0.0698577	0.092667	0.0623	0.0614829	0.11391	0.219786	0.198543	0.0567168	0.0734031	0.0381132	0.0794024	0.0749324	0.0849312	0.0732855	0.0777556	0.179744	0.208799	0.109634	0.0498486	0.0603374	0.0897491	0.0886678	0.0929931	0.0967777	0.143058	0.181661	0.151384	0.0455234	A0A0A0MRJ3	Neuron navigator 1 OS=Homo sapiens OX=9606 GN=NAV1 PE=1 SV=1	unknown	NUCLEUS	0.632646	unknown
A0A0A0MT01	0.0279372	0.0454322	0.0599343	0.126157	0.0745874	0.109247	0.129065	0.0373692	0.0372371	0.353034	0.0365246	0.0454919	0.0896116	0.0689327	0.0979758	0.0884229	0.0646063	0.0328451	0.0400468	0.435542	0.0434503	0.0648714	0.126885	0.0695969	0.0737057	0.0610233	0.0690584	0.0654621	0.0521282	0.373819	A0A0A0MT01	Gelsolin OS=Homo sapiens OX=9606 GN=GSN PE=1 SV=1	unknown	CYTOSOL	0.942997	CYTOSOL
O00267-2	0.0569247	0.0450611	0.06034	0.107814	0.0663759	0.081021	0.118059	0.102629	0.136451	0.225324	0.0493667	0.0370295	0.0687913	0.0614524	0.0820443	0.0731252	0.063775	0.0891677	0.125371	0.349877	0.0688917	0.0607061	0.0912105	0.0595307	0.0645842	0.0572502	0.0565042	0.0665409	0.0769014	0.39788	O00267-2	Isoform 2 of Transcription elongation factor SPT5 OS=Homo sapiens OX=9606 GN=SUPT5H	unknown	CYTOSOL	0.737364	unknown
P06865	0.063021	0.25222	0.244466	0.287583	0.0760141	0.0318202	0.0241035	0.00805103	0.00421131	0.00850932	0.0714286	0.220895	0.349857	0.206603	0.0853526	0.0223196	0.0156811	0.00485944	0.00498441	0.0180189	0.0771938	0.232868	0.361209	0.178217	0.058	0.0236279	0.0186047	0.0130078	0.011907	0.0253643	P06865	Beta-hexosaminidase subunit alpha OS=Homo sapiens OX=9606 GN=HEXA PE=1 SV=2	unknown	LYSOSOME	0.764799	LYSOSOME
Q9BZE9	0.0308668	0.0495419	0.0621564	0.129739	0.0673009	0.0959126	0.130585	0.0715292	0.0889359	0.273432	0.0416771	0.0346061	0.0601447	0.0688795	0.0772814	0.0694618	0.0515764	0.0464188	0.080193	0.469761	0.0472812	0.0574934	0.101658	0.0613395	0.0655836	0.05	0.0560345	0.0751989	0.126989	0.358422	Q9BZE9	Tether containing UBX domain for GLUT4 OS=Homo sapiens OX=9606 GN=ASPSCR1 PE=1 SV=1	unknown	CYTOSOL	0.852891	unknown
O15226	0.157287	0.0437107	0.0439335	0.0824756	0.0530232	0.0517311	0.128147	0.248808	0.176803	0.0140801	0.143101	0.0481192	0.106652	0.0755903	0.0748721	0.0619445	0.0704731	0.158811	0.162582	0.0978544	0.138608	0.0707844	0.0476152	0.0457681	0.051608	0.0488918	0.0805356	0.224794	0.256818	0.0345774	O15226	NF-kappa-B-repressing factor OS=Homo sapiens OX=9606 GN=NKRF PE=1 SV=2	NUCLEUS	NUCLEUS	1	NUCLEUS
Q9P0N9	0.0874915	0.0772386	0.0911369	0.122351	0.088175	0.0956938	0.134427	0.141718	0.133971	0.0277968	0.210681	0.0754009	0.12557	0.115419	0.0971384	0.0577093	0.0716125	0.112476	0.105046	0.0289466	0.0515848	0.0650508	0.081417	0.0706443	0.0818314	0.0812099	0.108349	0.200746	0.192252	0.0669153	Q9P0N9	TBC1 domain family member 7 OS=Homo sapiens OX=9606 GN=TBC1D7 PE=1 SV=1	unknown	NUCLEUS	0.599822	unknown
P20248	0.0505888	0.0280312	0.0582186	0.106319	0.0711561	0.0643556	0.141815	0.214795	0.206834	0.0578869	0.0610835	0.0375898	0.0684771	0.076838	0.0941128	0.0860973	0.0981205	0.197278	0.188847	0.0915561	0.0511972	0.0764065	0.0915904	0.0747518	0.0845824	0.0743625	0.106774	0.176368	0.148725	0.115242	P20248	Cyclin-A2 OS=Homo sapiens OX=9606 GN=CCNA2 PE=1 SV=2	unknown	NUCLEUS	0.955232	NUCLEUS
Q8WUI4	0.0422852	0.0598291	0.0490328	0.0962663	0.0580297	0.0535313	0.0962663	0.125956	0.152047	0.266757	0.0266844	0.0253562	0.0487805	0.053731	0.0549384	0.0653224	0.0771553	0.0969573	0.0982854	0.452789	0.035865	0.0530942	0.10443	0.07173	0.0562588	0.0587201	0.0622363	0.0618847	0.0664557	0.429325	Q8WUI4	Histone deacetylase 7 OS=Homo sapiens OX=9606 GN=HDAC7 PE=1 SV=2	unknown	CYTOSOL	0.58523	unknown
P34059	0.0630542	0.242919	0.258067	0.287377	0.0652709	0.0269089	0.0283867	0.00554187	0.00757389	0.0149015	0.0756308	0.224394	0.353454	0.183144	0.0708843	0.0227954	0.0168311	0.0130215	0.0145516	0.0252935	0.0792177	0.221045	0.347684	0.166521	0.0539773	0.0301573	0.0253497	0.0190122	0.0161713	0.0408654	P34059	N-acetylgalactosamine-6-sulfatase OS=Homo sapiens OX=9606 GN=GALNS PE=1 SV=1	LYSOSOME	LYSOSOME	1	LYSOSOME
B8ZWD1	0.0308627	0.0431603	0.0455819	0.110346	0.0938227	0.0632923	0.107117	0.037795	0.0235032	0.444518	0.0557267	0.0701697	0.125922	0.0903444	0.135365	0.133598	0.114938	0.0429755	0.0461317	0.18483	0.056205	0.0888547	0.156601	0.090594	0.0951286	0.0780211	0.0938366	0.0917494	0.0685915	0.180418	B8ZWD1	Acyl-CoA-binding protein OS=Homo sapiens OX=9606 GN=DBI PE=1 SV=1	unknown	CYTOSOL	0.781939	unknown
Q14651	0.134726	0.119292	0.113146	0.161893	0.0897176	0.0878282	0.0749801	0.0400955	0.0428202	0.135501	0.146314	0.0790477	0.112171	0.123729	0.109847	0.0727899	0.0550562	0.0276606	0.0368944	0.236491	0.0763182	0.136807	0.161803	0.116446	0.0801658	0.0535816	0.0528715	0.0531168	0.0427232	0.226166	Q14651	Plastin-1 OS=Homo sapiens OX=9606 GN=PLS1 PE=1 SV=2	unknown	CYTOSOL	0.277322	unknown
F8W7U0	0.171932	0.176592	0.110478	0.116865	0.0650785	0.0764716	0.0921802	0.0550665	0.059382	0.0759537	0.312027	0.128032	0.10475	0.0761251	0.0707043	0.0600577	0.0562749	0.0328758	0.0428594	0.116294	0.245345	0.220053	0.160158	0.0729572	0.0541273	0.0452335	0.0387021	0.0478738	0.0467621	0.0687882	F8W7U0	Intersectin-1 OS=Homo sapiens OX=9606 GN=ITSN1 PE=1 SV=1	unknown	NUCLEUS-CHROMATIN	0.576986	NUCLEUS-CHROMATIN
Q9Y333	0.0510847	0.0406412	0.0481666	0.0842196	0.0679977	0.0674986	0.115512	0.239777	0.148954	0.136149	0.0544558	0.0357458	0.0639126	0.0623063	0.0769892	0.0700889	0.0827583	0.172734	0.19124	0.189769	0.0612687	0.0540022	0.0807664	0.0616072	0.0635479	0.0602306	0.085212	0.167016	0.156545	0.209803	Q9Y333	U6 snRNA-associated Sm-like protein LSm2 OS=Homo sapiens OX=9606 GN=LSM2 PE=1 SV=1	unknown	NUCLEUS	0.948562	NUCLEUS
O75347	0.0261192	0.044111	0.069033	0.14589	0.0766714	0.0851699	0.129095	0.0303516	0.0347188	0.35884	0.0404418	0.050887	0.0935439	0.0812676	0.118963	0.126701	0.114493	0.0653783	0.0689027	0.239422	0.0414078	0.0746633	0.127366	0.0707578	0.076046	0.0544442	0.068612	0.0687646	0.0587897	0.359149	O75347	Tubulin-specific chaperone A OS=Homo sapiens OX=9606 GN=TBCA PE=1 SV=3	unknown	CYTOSOL	0.872369	CYTOSOL
H7C173	0.0517799	0.0317741	0.0535452	0.102089	0.0620771	0.059135	0.120624	0.314504	0.170638	0.0338335	0.0645089	0.0413576	0.0594516	0.0667566	0.0772084	0.0750731	0.100135	0.253203	0.217914	0.044392	0.0540738	0.0556427	0.0877523	0.0710177	0.0859743	0.117666	0.171949	0.206673	0.116515	0.0327372	H7C173	Mitotic-spindle organizing protein 2B (Fragment) OS=Homo sapiens OX=9606 GN=MZT2B PE=1 SV=1	unknown	NUCLEUS	0.523621	unknown
P14625	0.0570496	0.12478	0.184884	0.306376	0.134205	0.0729099	0.0571103	0.011707	0.00975667	0.0412222	0.0610578	0.0992638	0.230665	0.24785	0.172971	0.0682383	0.0397652	0.00745166	0.00800505	0.064733	0.0666473	0.139122	0.267225	0.199856	0.124171	0.0704086	0.0476844	0.0162976	0.0101879	0.0583994	P14625	Endoplasmin OS=Homo sapiens OX=9606 GN=HSP90B1 PE=1 SV=1	ER	ER	1	ER
J3QRU1	0.104095	0.101712	0.113904	0.177251	0.12292	0.117757	0.162596	0.0582231	0.0166409	0.0249017	0.214543	0.0902288	0.153625	0.16781	0.131017	0.0741846	0.0770308	0.0300457	0.0214612	0.0400533	0.203358	0.196361	0.208482	0.121743	0.0772571	0.0504998	0.0526554	0.0391909	0.0197438	0.0307092	J3QRU1	Tyrosine-protein kinase OS=Homo sapiens OX=9606 GN=YES1 PE=1 SV=1	unknown	PM	0.835066	PM
Q12959	0.165864	0.133226	0.130134	0.172439	0.0902322	0.0754958	0.110138	0.0563884	0.0368909	0.0291917	0.273813	0.0945366	0.131557	0.125647	0.0954259	0.0660222	0.0592665	0.0450523	0.0431446	0.0655345	0.225396	0.219019	0.195997	0.099921	0.0579407	0.0400008	0.0408097	0.0440265	0.0361177	0.0407717	Q12959	Disks large homolog 1 OS=Homo sapiens OX=9606 GN=DLG1 PE=1 SV=2	unknown	PM	0.424205	unknown
Q96AE4	0.0967259	0.0417487	0.0591611	0.0887602	0.066471	0.108727	0.246398	0.16462	0.119258	0.00812969	0.124542	0.0386496	0.0580793	0.087461	0.0948771	0.10056	0.202169	0.189052	0.0881269	0.0164833	0.167168	0.0810376	0.0819327	0.0778772	0.0818614	0.0840317	0.149545	0.210313	0.0607842	0.0054495	Q96AE4	Far upstream element-binding protein 1 OS=Homo sapiens OX=9606 GN=FUBP1 PE=1 SV=3	unknown	NUCLEUS	0.702747	unknown
Q14683	0.231344	0.0648229	0.039232	0.0703126	0.0403133	0.043682	0.0923823	0.220462	0.185472	0.0119775	0.270044	0.0460604	0.057185	0.0584902	0.0582529	0.0471482	0.0566411	0.165859	0.18262	0.0576992	0.301869	0.116961	0.0541482	0.0461847	0.0514964	0.047692	0.0759751	0.138159	0.156327	0.0111875	Q14683	Structural maintenance of chromosomes protein 1A OS=Homo sapiens OX=9606 GN=SMC1A PE=1 SV=2	NUCLEUS-CHROMATIN	NUCLEUS-CHROMATIN	1	NUCLEUS-CHROMATIN
F8WCT1	0.027835	0.0389752	0.05127	0.0927729	0.0633464	0.064501	0.156806	0.22112	0.215191	0.0681832	0.0455105	0.0420938	0.0740741	0.0854859	0.0909526	0.0798825	0.099016	0.141315	0.184707	0.156963	0.0343566	0.0472723	0.106107	0.0635542	0.0964473	0.0877758	0.125901	0.1701	0.174417	0.094069	F8WCT1	ADP-ribosylation factor-like protein 6-interacting protein 4 OS=Homo sapiens OX=9606 GN=ARL6IP4 PE=1 SV=1	unknown	NUCLEUS	0.640337	unknown
Q9NQC8	0.0591851	0.0548932	0.0577545	0.078154	0.0710009	0.078154	0.111217	0.213903	0.166799	0.108939	0.0541562	0.0314861	0.0787154	0.040932	0.0780856	0.0648615	0.052267	0.130982	0.15995	0.308564	0.031031	0.048048	0.0890891	0.0680681	0.046046	0.0800801	0.0680681	0.166166	0.18018	0.223223	Q9NQC8	Intraflagellar transport protein 46 homolog OS=Homo sapiens OX=9606 GN=IFT46 PE=1 SV=1	unknown	NUCLEUS	0.796668	unknown
X6RLT1	0.0395083	0.0377887	0.0423319	0.073412	0.0639012	0.0688477	0.121179	0.263226	0.223293	0.0665124	0.0568915	0.0379831	0.0662875	0.0694638	0.0843311	0.068649	0.0852791	0.18476	0.214761	0.131594	0.0403643	0.0492213	0.0831498	0.0631863	0.067279	0.0744958	0.11586	0.186435	0.166237	0.153772	X6RLT1	Negative elongation factor C/D (Fragment) OS=Homo sapiens OX=9606 GN=NELFCD PE=1 SV=1	unknown	NUCLEUS	0.96996	NUCLEUS
Q9BVP2	0.111373	0.0404859	0.0442365	0.0798675	0.0629688	0.0649692	0.128688	0.223996	0.207618	0.0357976	0.0954735	0.0349401	0.0636163	0.0757034	0.0816002	0.0629068	0.0886714	0.197284	0.225544	0.0742598	0.104618	0.0528539	0.0630753	0.0552823	0.0595319	0.0560505	0.104357	0.248138	0.23249	0.0236021	Q9BVP2	Guanine nucleotide-binding protein-like 3 OS=Homo sapiens OX=9606 GN=GNL3 PE=1 SV=2	unknown	NUCLEUS	0.978756	NUCLEUS
M9T4I7	0.018175	0.0305415	0.0430954	0.0966835	0.0738242	0.0764474	0.236462	0.233464	0.135095	0.0562114	0.0423729	0.0423729	0.0918079	0.0550847	0.0903955	0.0833333	0.107345	0.169492	0.128531	0.189266	0.0455145	0.0870712	0.0976253	0.0587071	0.0646438	0.0580475	0.100264	0.138522	0.10686	0.242744	M9T4I7	MEX3C variant 2 OS=Homo sapiens OX=9606 GN=MEX3C PE=1 SV=1	unknown	NUCLEUS	0.806462	unknown
Q86YP4	0.316534	0.0901857	0.0362511	0.0804598	0.0554819	0.0492927	0.0676393	0.132626	0.105438	0.066092	0.339656	0.0438648	0.0414938	0.0616479	0.0735033	0.06639	0.0391227	0.0960285	0.102549	0.135744	0.255597	0.127799	0.0662313	0.068097	0.0559701	0.0429104	0.0671642	0.0988806	0.0876866	0.129664	Q86YP4	Transcriptional repressor p66-alpha OS=Homo sapiens OX=9606 GN=GATAD2A PE=1 SV=1	unknown	NUCLEUS-CHROMATIN	0.877246	NUCLEUS-CHROMATIN
Q9Y606	0.136492	0.183611	0.0865557	0.0886044	0.0591549	0.0576184	0.0709347	0.0466069	0.0430218	0.227401	0.25214	0.157973	0.119393	0.0427463	0.0557014	0.0502226	0.0318457	0.0266522	0.0295628	0.233763	0.152338	0.222522	0.110319	0.0553122	0.0502699	0.0441581	0.0526637	0.0773149	0.0653458	0.169757	Q9Y606	tRNA pseudouridine synthase A OS=Homo sapiens OX=9606 GN=PUS1 PE=1 SV=3	unknown	NUCLEUS-CHROMATIN	0.499604	unknown
A0A0A0MR51	0.0628786	0.111664	0.176169	0.286206	0.150501	0.0900453	0.0832217	0.021204	0.0102991	0.007812	0.0742372	0.087548	0.234261	0.254521	0.182021	0.0794979	0.0458294	0.0115002	0.0129683	0.0176173	0.094019	0.101081	0.235489	0.161554	0.143015	0.10373	0.0900463	0.0364158	0.0156698	0.0189804	A0A0A0MR51	Fatty acid desaturase 1 OS=Homo sapiens OX=9606 GN=FADS1 PE=1 SV=1	unknown	ER	0.930772	ER
P40763	0.0606047	0.0671477	0.0746653	0.10571	0.0866609	0.0897237	0.0994687	0.0968468	0.0975429	0.221629	0.0714369	0.0499743	0.0894449	0.071717	0.0918608	0.069873	0.0614934	0.0668853	0.0854185	0.341896	0.056054	0.0574906	0.104478	0.0635757	0.0699862	0.0636571	0.0595099	0.0811807	0.0868728	0.357195	P40763	Signal transducer and activator of transcription 3 OS=Homo sapiens OX=9606 GN=STAT3 PE=1 SV=2	unknown	CYTOSOL	0.82582	unknown
Q9Y394	0.0593786	0.10967	0.203229	0.25789	0.127599	0.117744	0.0928249	0.0161465	0.00915668	0.00636075	0.0655071	0.0764734	0.20865	0.252406	0.187153	0.0949926	0.0672138	0.01605	0.00904172	0.0225135	0.0829811	0.126669	0.219442	0.170063	0.144495	0.0920618	0.0693392	0.043269	0.0243127	0.0273675	Q9Y394	Dehydrogenase/reductase SDR family member 7 OS=Homo sapiens OX=9606 GN=DHRS7 PE=1 SV=1	unknown	ER	0.878204	unknown
E9PN10	0.0571115	0.111577	0.134486	0.199793	0.128614	0.102349	0.146748	0.0778911	0.0231673	0.0182628	0.0778459	0.0880297	0.211185	0.213947	0.149694	0.0936394	0.0842323	0.0425045	0.0143264	0.0245965	0.0610875	0.131573	0.250392	0.147237	0.125084	0.0942045	0.0926382	0.0699262	0.0185724	0.00928619	E9PN10	Receptor-binding cancer antigen-expressed on SiSo cells (Fragment) OS=Homo sapiens OX=9606 GN=EBAG9 PE=1 SV=1	unknown	ER	0.357136	unknown
Q15424	0.222146	0.0481919	0.0338763	0.0682606	0.054468	0.0636581	0.153213	0.196458	0.122415	0.0373132	0.221105	0.037623	0.0426041	0.0514762	0.0648902	0.064542	0.107494	0.19299	0.145405	0.0718698	0.284322	0.105999	0.0434985	0.0370059	0.0437038	0.0415209	0.0764466	0.210142	0.134955	0.0224069	Q15424	Scaffold attachment factor B1 OS=Homo sapiens OX=9606 GN=SAFB PE=1 SV=4	unknown	NUCLEUS	0.918213	NUCLEUS
Q14331	0.032881	0.0408289	0.0530747	0.0977304	0.0697065	0.0770952	0.152748	0.235318	0.201996	0.0386212	0.0559969	0.0394626	0.0793128	0.0846089	0.0969773	0.0672673	0.0857069	0.174837	0.207034	0.108797	0.0560132	0.0555006	0.0865459	0.0741717	0.0837086	0.0790957	0.131173	0.181805	0.184185	0.0678016	Q14331	Protein FRG1 OS=Homo sapiens OX=9606 GN=FRG1 PE=1 SV=1	unknown	NUCLEUS	0.721143	unknown
Q8WZ82	0.0885641	0.0980224	0.0782459	0.110347	0.0642018	0.075953	0.0942964	0.0885641	0.0728002	0.229005	0.10426	0.0726112	0.0782166	0.0569162	0.0604519	0.0664884	0.0552777	0.061573	0.0705416	0.373663	0.0996299	0.10549	0.0885256	0.044417	0.0567551	0.0610734	0.082665	0.0786552	0.0783467	0.304442	Q8WZ82	Esterase OVCA2 OS=Homo sapiens OX=9606 GN=OVCA2 PE=1 SV=1	unknown	CYTOSOL	0.67412	unknown
P13984	0.0823385	0.0744406	0.0624121	0.104761	0.0592801	0.0701738	0.112659	0.159548	0.141936	0.13245	0.133239	0.0450137	0.0733472	0.0662131	0.0782726	0.0614908	0.0603229	0.0933279	0.12547	0.263304	0.0670394	0.054782	0.0893416	0.0547377	0.0613606	0.0599445	0.0750044	0.111924	0.148401	0.277465	P13984	General transcription factor IIF subunit 2 OS=Homo sapiens OX=9606 GN=GTF2F2 PE=1 SV=2	unknown	NUCLEUS	0.622579	unknown
Q96T76	0.033338	0.0564235	0.0742084	0.120031	0.0853676	0.0900405	0.103431	0.0620031	0.0803459	0.294811	0.0317671	0.03783	0.0682708	0.0558292	0.0790072	0.0689024	0.0413667	0.0311355	0.0632815	0.52261	0.0407764	0.0677547	0.0926221	0.0607527	0.0645626	0.0522061	0.0573032	0.0702775	0.0818617	0.411883	Q96T76	MMS19 nucleotide excision repair protein homolog OS=Homo sapiens OX=9606 GN=MMS19 PE=1 SV=2	unknown	CYTOSOL	0.870124	CYTOSOL
Q9NSK0	0.0411901	0.0526981	0.0658901	0.0997825	0.0658901	0.0849063	0.110027	0.142797	0.142516	0.194302	0.0542897	0.0433039	0.0551035	0.0665543	0.0807952	0.0753894	0.0824227	0.141479	0.140316	0.260346	0.08753	0.089865	0.0990786	0.0561656	0.0652531	0.0506121	0.0542093	0.0729522	0.0880979	0.336236	Q9NSK0	Kinesin light chain 4 OS=Homo sapiens OX=9606 GN=KLC4 PE=1 SV=3	unknown	CYTOSOL	0.441266	unknown
P47895	0.0433937	0.0643434	0.0669033	0.111176	0.0759183	0.0938237	0.10544	0.0419131	0.0540139	0.343075	0.054272	0.0539986	0.0776727	0.0539458	0.0867124	0.0719869	0.057578	0.0305307	0.0480008	0.465302	0.0453267	0.0634995	0.102672	0.0565349	0.0611583	0.04798	0.0555563	0.058855	0.0712656	0.437152	P47895	Aldehyde dehydrogenase family 1 member A3 OS=Homo sapiens OX=9606 GN=ALDH1A3 PE=1 SV=2	unknown	CYTOSOL	0.916419	CYTOSOL
Q02952	0.0372802	0.0580343	0.0702619	0.119267	0.0888479	0.0983996	0.106112	0.0377223	0.0370733	0.347002	0.0358228	0.0438517	0.0780336	0.0662097	0.0881525	0.0785029	0.0604261	0.0266257	0.0320548	0.49032	0.0441154	0.070569	0.120184	0.0749456	0.0684352	0.0577309	0.059375	0.0618354	0.053984	0.388825	Q02952	A-kinase anchor protein 12 OS=Homo sapiens OX=9606 GN=AKAP12 PE=1 SV=4	unknown	CYTOSOL	0.932279	CYTOSOL
P30050	0.0230126	0.0433569	0.0750268	0.116217	0.0538524	0.0894252	0.1874	0.201027	0.205415	0.00526665	0.044695	0.0431806	0.0810713	0.111629	0.105011	0.0839963	0.135568	0.210789	0.159207	0.0248525	0.0491629	0.0653133	0.0936352	0.0928451	0.0970518	0.0867452	0.134392	0.202937	0.168558	0.00935996	P30050	60S ribosomal protein L12 OS=Homo sapiens OX=9606 GN=RPL12 PE=1 SV=1	unknown	RIBOSOME	0.824165	RIBOSOME
cRAPR1	0.087037	0.149074	0.15463	0.205556	0.10463	0.0675926	0.102778	0.0444444	0.0296296	0.0546296	0.124451	0.128099	0.190531	0.170881	0.141365	0.0768593	0.079015	0.0287704	0.0132659	0.0467623	0.0941623	0.121021	0.186903	0.12418	0.0913184	0.0634331	0.06525	0.0590884	0.0468441	0.1478	cRAPR1	Alpha-2-HS-glycoprotein OS=Bos taurus OX=9913 GN=AHSG PE=1 SV=2	unknown	GOLGI	0.389507	unknown
Q9UBU9	0.0476527	0.0386276	0.0424482	0.0824597	0.0491118	0.058167	0.121208	0.286834	0.243949	0.0295423	0.0563797	0.036558	0.0684079	0.068036	0.0787203	0.0603018	0.0773087	0.217827	0.255103	0.0813575	0.0861981	0.0585843	0.0746191	0.0687047	0.0750087	0.0766572	0.101883	0.17892	0.212758	0.0666667	Q9UBU9	Nuclear RNA export factor 1 OS=Homo sapiens OX=9606 GN=NXF1 PE=1 SV=1	unknown	NUCLEUS	0.968746	NUCLEUS
Q14192	0.0475607	0.0536544	0.0646156	0.129974	0.0837513	0.106714	0.168543	0.122246	0.0994315	0.123509	0.0583151	0.0529761	0.0804017	0.0968316	0.128897	0.0911749	0.102139	0.0942893	0.10163	0.193345	0.0724389	0.0831445	0.124717	0.114558	0.0933031	0.0808002	0.0916621	0.113542	0.078534	0.1473	Q14192	Four and a half LIM domains protein 2 OS=Homo sapiens OX=9606 GN=FHL2 PE=1 SV=3	unknown	NUCLEUS	0.432199	unknown
Q92845	0.0284656	0.0440632	0.0818873	0.106064	0.0631702	0.0949503	0.144278	0.139403	0.187951	0.109768	0.0346097	0.0213549	0.0758468	0.0758468	0.0810015	0.0589102	0.10972	0.142121	0.181885	0.218704	0.0392409	0.0617562	0.0954005	0.0744934	0.0752654	0.076359	0.080283	0.124542	0.130717	0.241943	Q92845	Kinesin-associated protein 3 OS=Homo sapiens OX=9606 GN=KIFAP3 PE=1 SV=2	unknown	NUCLEUS	0.813839	unknown
Q08209-2	0.0531353	0.0697277	0.0850379	0.127244	0.089953	0.104179	0.103401	0.0486323	0.0529063	0.265783	0.073324	0.0599283	0.0949492	0.0843858	0.112855	0.0928706	0.0668814	0.0444782	0.0489151	0.321413	0.0755763	0.101739	0.14258	0.0841837	0.0718773	0.0601581	0.0590542	0.0678965	0.0585141	0.27842	Q08209-2	Isoform 2 of Serine/threonine-protein phosphatase 2B catalytic subunit alpha isoform OS=Homo sapiens OX=9606 GN=PPP3CA	unknown	CYTOSOL	0.900642	CYTOSOL
Q9P035	0.0593106	0.120993	0.201966	0.293261	0.151324	0.0839634	0.0747204	0.00967427	0.0025156	0.00227122	0.0697458	0.0877472	0.239909	0.276531	0.182934	0.0785498	0.0457691	0.00801734	0.00486229	0.0059335	0.0858952	0.140211	0.234495	0.203323	0.147914	0.0899384	0.0638085	0.0222958	0.00623911	0.00587894	Q9P035	Very-long-chain (3R)-3-hydroxyacyl-CoA dehydratase 3 OS=Homo sapiens OX=9606 GN=HACD3 PE=1 SV=2	ER	ER	1	ER
Q9NVQ4	0.105651	0.207037	0.140157	0.0795774	0.0514685	0.0580595	0.0629059	0.0347	0.0355724	0.224872	0.048583	0.0458594	0.090541	0.0658815	0.090173	0.0795731	0.0560913	0.0286345	0.04159	0.453073	0.060254	0.0675493	0.112942	0.0802486	0.0815996	0.0745744	0.0502567	0.0580924	0.0702513	0.344231	Q9NVQ4	Fas apoptotic inhibitory molecule 1 OS=Homo sapiens OX=9606 GN=FAIM PE=1 SV=1	unknown	CYTOSOL	0.532728	unknown
P20290-2	0.0244747	0.0446753	0.0630832	0.116269	0.0978328	0.121996	0.20995	0.156293	0.104994	0.0604319	0.0465524	0.0431048	0.0913229	0.0994674	0.109016	0.108416	0.159462	0.134941	0.117306	0.0904126	0.0357293	0.0475941	0.109772	0.0943043	0.113038	0.122865	0.186092	0.16634	0.0606648	0.0636011	P20290-2	Isoform 2 of Transcription factor BTF3 OS=Homo sapiens OX=9606 GN=BTF3	unknown	RIBOSOME	0.347604	unknown
Q13126	0.023645	0.0468222	0.0761576	0.132308	0.0698955	0.115263	0.129735	0.0286858	0.0415995	0.335888	0.0425267	0.0506587	0.0980346	0.0801184	0.118354	0.100481	0.0811483	0.0398232	0.0445865	0.344269	0.0454734	0.0664505	0.119397	0.0736472	0.0762767	0.0568615	0.0635046	0.0672216	0.0590364	0.372131	Q13126	S-methyl-5'-thioadenosine phosphorylase OS=Homo sapiens OX=9606 GN=MTAP PE=1 SV=2	unknown	CYTOSOL	0.935333	CYTOSOL
Q9H4Z3	0.0364231	0.0329973	0.0404394	0.0831627	0.0609151	0.0642227	0.122066	0.261537	0.237203	0.0610332	0.0529722	0.0378715	0.0745446	0.0681328	0.0738255	0.071848	0.0801174	0.178212	0.215664	0.146812	0.0484995	0.0478219	0.0863504	0.0649564	0.075605	0.0723136	0.110552	0.173185	0.179477	0.141239	Q9H4Z3	Phosphorylated CTD-interacting factor 1 OS=Homo sapiens OX=9606 GN=PCIF1 PE=1 SV=1	unknown	NUCLEUS	0.968571	NUCLEUS
Q01085	0.0701278	0.0529022	0.0499231	0.100111	0.0852873	0.0992937	0.210431	0.210095	0.0960504	0.0257784	0.0872798	0.0471007	0.0819226	0.0904513	0.112609	0.0899799	0.141109	0.176145	0.125638	0.047765	0.105702	0.0612641	0.0951938	0.0791545	0.0792431	0.0857498	0.151725	0.216148	0.0792321	0.0465882	Q01085	Nucleolysin TIAR OS=Homo sapiens OX=9606 GN=TIAL1 PE=1 SV=1	unknown	NUCLEUS	0.500479	unknown
Q99567	0.0909663	0.0545672	0.0530147	0.089204	0.0715185	0.0702597	0.128268	0.219905	0.178492	0.0438048	0.0966362	0.0438976	0.0761175	0.0771104	0.0917193	0.0701605	0.079427	0.171359	0.190176	0.103397	0.103987	0.0688906	0.0999868	0.0689828	0.077576	0.0703382	0.0754705	0.143835	0.16235	0.128583	Q99567	Nuclear pore complex protein Nup88 OS=Homo sapiens OX=9606 GN=NUP88 PE=1 SV=2	unknown	NUCLEUS	0.970921	NUCLEUS
Q9UNS1	0.0697298	0.0469431	0.0663678	0.110821	0.077948	0.0921429	0.10198	0.0491844	0.0681111	0.316773	0.0607502	0.0399783	0.0684569	0.0600879	0.0717683	0.0813414	0.0538262	0.034379	0.0514781	0.477934	0.05916	0.0650504	0.0957828	0.0570258	0.0618918	0.0571965	0.0641113	0.0612942	0.0635137	0.414974	Q9UNS1	Protein timeless homolog OS=Homo sapiens OX=9606 GN=TIMELESS PE=1 SV=2	unknown	CYTOSOL	0.913483	CYTOSOL
P16144-2	0.0652754	0.103039	0.164694	0.26066	0.138065	0.0955618	0.117333	0.0292974	0.0107673	0.0153081	0.091711	0.0810449	0.202073	0.23376	0.167158	0.0957238	0.0714282	0.0155148	0.00879808	0.0327881	0.101156	0.143415	0.239664	0.169754	0.127904	0.0849401	0.0706329	0.0321431	0.0113265	0.0190643	P16144-2	Isoform Beta-4A of Integrin beta-4 OS=Homo sapiens OX=9606 GN=ITGB4	unknown	ER	0.804824	unknown
Q14554	0.0466491	0.129372	0.24088	0.321006	0.110287	0.0615262	0.0613228	0.0121863	0.011936	0.00483387	0.0762216	0.101587	0.236978	0.242588	0.169543	0.0670238	0.0405051	0.0198179	0.0209084	0.0248277	0.0756102	0.163218	0.271253	0.188215	0.131677	0.0667079	0.0442754	0.021047	0.0189836	0.0190131	Q14554	Protein disulfide-isomerase A5 OS=Homo sapiens OX=9606 GN=PDIA5 PE=1 SV=1	ER	ER	1	ER
Q96HP0	0.0292083	0.0511914	0.0710223	0.141122	0.0757879	0.0757879	0.138509	0.175711	0.175865	0.0657955	0.065	0.05	0.0825	0.10125	0.04125	0.13625	0.12875	0.1475	0.16125	0.08625	0.0724183	0.0979124	0.115832	0.104378	0.0947718	0.0751894	0.104194	0.155551	0.140218	0.0395345	Q96HP0	Dedicator of cytokinesis protein 6 OS=Homo sapiens OX=9606 GN=DOCK6 PE=1 SV=3	unknown	NUCLEUS	0.636565	unknown
P58107	0.0305647	0.0517741	0.0616841	0.103222	0.0787934	0.0999743	0.0951594	0.0468335	0.0485947	0.3834	0.0348526	0.0353151	0.0653468	0.0499772	0.0746089	0.0681064	0.047775	0.0296917	0.0417594	0.552567	0.042216	0.049761	0.0942881	0.0539676	0.0584357	0.0530432	0.0543458	0.0590334	0.0669144	0.467995	P58107	Epiplakin OS=Homo sapiens OX=9606 GN=EPPK1 PE=1 SV=3	unknown	CYTOSOL	0.879116	CYTOSOL
H0Y547	0.0824852	0.122189	0.135821	0.193492	0.122063	0.125832	0.151715	0.0450433	0.00678477	0.0145747	0.129188	0.0826176	0.157131	0.173824	0.14951	0.111044	0.11056	0.0327809	0.016209	0.0371356	0.133895	0.135057	0.184723	0.127505	0.0824862	0.10427	0.0871333	0.0607029	0.0467615	0.0374673	H0Y547	Phospholipid-transporting ATPase (Fragment) OS=Homo sapiens OX=9606 GN=ATP11A PE=1 SV=1	unknown	PM	0.555975	unknown
Q96C36	0.389418	0.410721	0.106795	0.0338468	0.0109989	0.00744423	0.00700634	0.0159446	0.0114368	0.00638813	0.490599	0.269272	0.142655	0.0273493	0.0131471	0.00839893	0.00782915	0.0107624	0.0106147	0.0193724	0.393828	0.344666	0.148437	0.0309489	0.014764	0.0121474	0.0109344	0.0155438	0.0133604	0.0153705	Q96C36	Pyrroline-5-carboxylate reductase 2 OS=Homo sapiens OX=9606 GN=PYCR2 PE=1 SV=1	unknown	MITOCHONDRIA	0.951436	unknown
Q8IZT6	0.0348277	0.0379356	0.0474341	0.090789	0.0715784	0.0832524	0.161299	0.255701	0.186803	0.0303796	0.0616974	0.0377884	0.0726895	0.0891776	0.0890763	0.0726895	0.107667	0.206038	0.207938	0.055239	0.0390109	0.0502381	0.0860544	0.0891107	0.109476	0.104439	0.164199	0.203579	0.128337	0.0255568	Q8IZT6	Abnormal spindle-like microcephaly-associated protein OS=Homo sapiens OX=9606 GN=ASPM PE=1 SV=2	unknown	RIBOSOME	0.883552	RIBOSOME
Q8IZH2	0.0214273	0.0367732	0.0428335	0.0747057	0.0511704	0.0577578	0.124358	0.287008	0.27416	0.0298064	0.04825	0.0341549	0.0715198	0.0686986	0.0730748	0.0581577	0.0784174	0.218891	0.268285	0.08055	0.0392733	0.047755	0.090279	0.0755433	0.0812858	0.0872923	0.119767	0.207224	0.198858	0.0527219	Q8IZH2	5'-3' exoribonuclease 1 OS=Homo sapiens OX=9606 GN=XRN1 PE=1 SV=1	unknown	NUCLEUS	0.942018	NUCLEUS
Q9BY44	0.024227	0.0414722	0.0549683	0.109892	0.0706684	0.086284	0.168788	0.18919	0.21888	0.0356303	0.0473424	0.0418984	0.0958152	0.100202	0.106141	0.0741518	0.1028	0.135307	0.198081	0.0982616	0.0319574	0.0485907	0.0878538	0.0826536	0.0906902	0.0949086	0.145372	0.188112	0.205847	0.0240153	Q9BY44	Eukaryotic translation initiation factor 2A OS=Homo sapiens OX=9606 GN=EIF2A PE=1 SV=3	unknown	RIBOSOME	0.905858	RIBOSOME
Q9BQA1	0.0276656	0.0418956	0.0588391	0.0946456	0.0804156	0.0835264	0.0927924	0.101595	0.169634	0.248991	0.0382619	0.0388041	0.0723414	0.0650608	0.0911626	0.0853536	0.0662226	0.0670746	0.129579	0.346139	0.0315007	0.0520646	0.0860212	0.0536036	0.060611	0.0515079	0.0469564	0.100134	0.193327	0.324274	Q9BQA1	Methylosome protein 50 OS=Homo sapiens OX=9606 GN=WDR77 PE=1 SV=1	unknown	CYTOSOL	0.518903	unknown
Q86X55	0.0360967	0.0606364	0.0871773	0.109191	0.0918301	0.102411	0.114819	0.0411247	0.0640384	0.292676	0.0337949	0.0429477	0.0765907	0.0612532	0.0897331	0.0803319	0.058009	0.0366525	0.0558692	0.464818	0.0341876	0.0543548	0.107947	0.0638937	0.0669437	0.0666636	0.0518806	0.0612016	0.0697758	0.423152	Q86X55	Histone-arginine methyltransferase CARM1 OS=Homo sapiens OX=9606 GN=CARM1 PE=1 SV=3	unknown	CYTOSOL	0.914591	CYTOSOL
P28074	0.0182883	0.0324403	0.0426133	0.0806492	0.0524083	0.0674946	0.0772582	0.141918	0.301621	0.185308	0.0217758	0.0300703	0.0542048	0.0457203	0.0704473	0.0587768	0.048392	0.0922678	0.245157	0.333188	0.0257416	0.0372086	0.0595914	0.0412758	0.0450019	0.0388486	0.0373004	0.109474	0.357312	0.248245	P28074	Proteasome subunit beta type-5 OS=Homo sapiens OX=9606 GN=PSMB5 PE=1 SV=3	PROTEASOME	PROTEASOME	1	PROTEASOME
Q9NZI8	0.0205827	0.0369237	0.0552392	0.107626	0.0764992	0.0842823	0.226232	0.248267	0.135584	0.00876458	0.0437218	0.0414254	0.088731	0.101187	0.109858	0.0879238	0.144018	0.195144	0.149759	0.0382314	0.0336711	0.0494934	0.0945925	0.0881938	0.0970154	0.0991006	0.171068	0.229442	0.125327	0.0120962	Q9NZI8	Insulin-like growth factor 2 mRNA-binding protein 1 OS=Homo sapiens OX=9606 GN=IGF2BP1 PE=1 SV=2	unknown	RIBOSOME	0.812055	RIBOSOME
P98194	0.0751148	0.156474	0.164555	0.194582	0.106795	0.075023	0.128558	0.0579431	0.0219467	0.0190083	0.095092	0.0966672	0.209003	0.209086	0.138203	0.0793401	0.0727906	0.0376389	0.0274416	0.0347372	0.0864242	0.129636	0.220742	0.168527	0.100108	0.0871444	0.0853439	0.0594166	0.0385308	0.0241268	P98194	Calcium-transporting ATPase type 2C member 1 OS=Homo sapiens OX=9606 GN=ATP2C1 PE=1 SV=3	unknown	GOLGI	0.428479	unknown
Q8TAQ2	0.312984	0.101187	0.0628549	0.084667	0.0558854	0.0424626	0.0641456	0.108802	0.112932	0.0540785	0.305624	0.0519932	0.0630408	0.0641996	0.0592553	0.0533066	0.0602596	0.105995	0.129404	0.106922	0.428427	0.128393	0.0673499	0.0320982	0.0434734	0.0418966	0.0439239	0.0762473	0.0955063	0.042685	Q8TAQ2	SWI/SNF complex subunit SMARCC2 OS=Homo sapiens OX=9606 GN=SMARCC2 PE=1 SV=1	unknown	NUCLEUS-CHROMATIN	0.911615	NUCLEUS-CHROMATIN
O14641	0.0535201	0.0502736	0.0663204	0.101382	0.0748539	0.0866339	0.122809	0.162415	0.164641	0.117151	0.0389004	0.0436921	0.0668936	0.0708026	0.0848622	0.0876363	0.074018	0.0798815	0.101066	0.352248	0.0487096	0.0661842	0.104847	0.0704219	0.0691839	0.0701838	0.0714218	0.106514	0.114084	0.27845	O14641	Segment polarity protein dishevelled homolog DVL-2 OS=Homo sapiens OX=9606 GN=DVL2 PE=1 SV=1	unknown	CYTOSOL	0.384287	unknown
Q2M2I8	0.0699995	0.0668976	0.0646746	0.101018	0.0645453	0.0703872	0.14124	0.196867	0.18159	0.0427803	0.113109	0.0544644	0.0856405	0.0817361	0.0846545	0.0714032	0.0760569	0.152508	0.18891	0.0915168	0.118946	0.104665	0.126789	0.0828383	0.0791812	0.0757889	0.0998163	0.137694	0.123	0.0512816	Q2M2I8	AP2-associated protein kinase 1 OS=Homo sapiens OX=9606 GN=AAK1 PE=1 SV=3	unknown	NUCLEUS	0.931064	NUCLEUS
J3QLG5	0.0505762	0.0339309	0.0412932	0.0918694	0.0870679	0.0630602	0.162292	0.237516	0.168694	0.0637004	0.0735476	0.0346106	0.0630408	0.0580964	0.0822002	0.07911	0.092089	0.177379	0.193449	0.146477	0.104425	0.0672566	0.0654867	0.102655	0.0778761	0.106195	0.123894	0.155752	0.106195	0.0902655	J3QLG5	Cytosolic endo-beta-N-acetylglucosaminidase OS=Homo sapiens OX=9606 GN=ENGASE PE=1 SV=1	unknown	NUCLEUS	0.824402	unknown
Q92503	0.0590903	0.0793596	0.094888	0.128418	0.0946819	0.0885667	0.110829	0.123059	0.139755	0.0813522	0.0850225	0.0546171	0.101351	0.0855856	0.089527	0.0754505	0.101351	0.0917793	0.144144	0.171171	0.0761629	0.0858038	0.135454	0.0886961	0.0833936	0.0619426	0.0698964	0.0997831	0.102916	0.195951	Q92503	SEC14-like protein 1 OS=Homo sapiens OX=9606 GN=SEC14L1 PE=1 SV=2	unknown	NUCLEUS	0.623734	unknown
Q16576	0.174386	0.0585987	0.0464897	0.0830847	0.0694024	0.0777703	0.081185	0.0704513	0.0592397	0.279393	0.124812	0.0445332	0.0668052	0.0565999	0.0833414	0.0692294	0.0610911	0.0450743	0.0526282	0.395885	0.192092	0.0709434	0.0800906	0.0505441	0.0524594	0.0484793	0.0524793	0.0663149	0.0681304	0.318467	Q16576	Histone-binding protein RBBP7 OS=Homo sapiens OX=9606 GN=RBBP7 PE=1 SV=1	unknown	CYTOSOL	0.645182	unknown
Q9Y6M1	0.0226686	0.0372056	0.0574204	0.111531	0.0740403	0.0911166	0.238099	0.227128	0.126567	0.0142231	0.0436563	0.0428759	0.0869918	0.0990818	0.115811	0.0943035	0.149815	0.18897	0.138858	0.039637	0.040242	0.0520644	0.0975672	0.0879266	0.0952538	0.099362	0.176512	0.234644	0.0984069	0.0180217	Q9Y6M1	Insulin-like growth factor 2 mRNA-binding protein 2 OS=Homo sapiens OX=9606 GN=IGF2BP2 PE=1 SV=2	unknown	RIBOSOME	0.689325	unknown
Q96BZ9	0.0507511	0.091149	0.191027	0.287251	0.136825	0.113479	0.0793747	0.0172554	0.0158343	0.0170524	0.107613	0.0859183	0.10272	0.0941654	0.0901034	0.0599766	0.0468673	0.038374	0.0592381	0.315023	0.0604347	0.123885	0.262973	0.151904	0.123257	0.114964	0.0763915	0.0350547	0.0281442	0.0229928	Q96BZ9	TBC1 domain family member 20 OS=Homo sapiens OX=9606 GN=TBC1D20 PE=1 SV=1	unknown	NUCLEUS	0.209711	unknown
O15231	0.173532	0.118542	0.098259	0.128342	0.0708401	0.0655884	0.0939968	0.0739226	0.0669965	0.10998	0.172136	0.0701442	0.0821778	0.100436	0.0722362	0.0881255	0.0842699	0.0656316	0.0629344	0.201909	0.231058	0.167335	0.168121	0.0845414	0.0577997	0.0454023	0.0409336	0.0553835	0.0549378	0.0944875	O15231	Zinc finger protein 185 OS=Homo sapiens OX=9606 GN=ZNF185 PE=1 SV=3	unknown	NUCLEUS-CHROMATIN	0.511083	unknown
P43121	0.111676	0.109759	0.133062	0.183879	0.124027	0.112635	0.161095	0.0471114	0.00851548	0.00823921	0.189707	0.0995263	0.15442	0.186429	0.14761	0.0878065	0.0899142	0.0250032	0.0097048	0.00987852	0.204959	0.202401	0.229649	0.135432	0.0789031	0.0508462	0.0487261	0.028137	0.00848773	0.0124584	P43121	Cell surface glycoprotein MUC18 OS=Homo sapiens OX=9606 GN=MCAM PE=1 SV=2	unknown	PM	0.871173	PM
Q02833	0.0330986	0.0359155	0.0598592	0.0556338	0.0570423	0.0626761	0.128169	0.304225	0.210563	0.0528169	0.0789474	0.038131	0.0445757	0.0574651	0.0649839	0.0665951	0.0767991	0.246509	0.22073	0.105263	0.0670638	0.10383	0.129021	0.053617	0.069617	0.0798298	0.0750638	0.154723	0.153872	0.113362	Q02833	Ras association domain-containing protein 7 OS=Homo sapiens OX=9606 GN=RASSF7 PE=1 SV=1	unknown	NUCLEUS	0.941195	NUCLEUS
B3KVZ3	0.122486	0.0727834	0.0615859	0.119858	0.0670704	0.0747258	0.0933501	0.123286	0.132198	0.132655	0.0996969	0.0472165	0.0682725	0.0732174	0.0843835	0.0928378	0.0593396	0.100973	0.10863	0.265433	0.119476	0.0703689	0.0905196	0.0568822	0.0678302	0.0600555	0.0654502	0.10948	0.100754	0.259183	B3KVZ3	Centromere protein H OS=Homo sapiens OX=9606 GN=CENPH PE=1 SV=1	unknown	NUCLEUS	0.427977	unknown
E7ESY4	0.400438	0.0945782	0.0311208	0.059081	0.0537321	0.0527595	0.0544615	0.0926331	0.0741551	0.0870411	0.35801	0.0492966	0.0589971	0.0499773	0.0545155	0.0502042	0.039199	0.0668255	0.0883821	0.184593	0.517685	0.133002	0.0657702	0.0251388	0.0289389	0.0201695	0.0166618	0.0564163	0.0622625	0.073955	E7ESY4	Metastasis-associated protein MTA1 OS=Homo sapiens OX=9606 GN=MTA1 PE=1 SV=1	unknown	NUCLEUS-CHROMATIN	0.820976	NUCLEUS-CHROMATIN
G3V4T7	0.0595537	0.0586274	0.0542071	0.0945184	0.0555306	0.0578862	0.11384	0.244753	0.233583	0.0275006	0.103279	0.0568594	0.0818425	0.0845918	0.0816034	0.0619198	0.0773399	0.177471	0.199347	0.0757461	0.0979113	0.11718	0.122693	0.0823345	0.0671623	0.0612704	0.0771759	0.148308	0.164846	0.0611187	G3V4T7	FERM domain-containing protein 6 OS=Homo sapiens OX=9606 GN=FRMD6 PE=1 SV=1	unknown	NUCLEUS	0.955792	NUCLEUS
Q9UID3	0.0530515	0.0480654	0.0751895	0.0925409	0.0913442	0.076785	0.13941	0.233746	0.16414	0.025728	0.0773133	0.0483622	0.0954009	0.0934708	0.0921198	0.0738392	0.102349	0.176106	0.175885	0.0651539	0.0527033	0.0668795	0.0983823	0.0818646	0.101277	0.105577	0.141805	0.18229	0.132226	0.0369945	Q9UID3	Vacuolar protein sorting-associated protein 51 homolog OS=Homo sapiens OX=9606 GN=VPS51 PE=1 SV=2	unknown	RIBOSOME	0.867849	RIBOSOME
Q9BT22	0.0649318	0.113533	0.170873	0.26278	0.162806	0.0942043	0.0827194	0.0247626	0.0128575	0.0105325	0.0723769	0.0864027	0.218569	0.254952	0.182965	0.0867024	0.0518776	0.0160937	0.0111787	0.0188809	0.0750928	0.115319	0.231509	0.186538	0.143761	0.103212	0.0727361	0.0420662	0.0190799	0.010686	Q9BT22	Chitobiosyldiphosphodolichol beta-mannosyltransferase OS=Homo sapiens OX=9606 GN=ALG1 PE=1 SV=2	unknown	ER	0.93894	ER
Q92614	0.116645	0.121903	0.117629	0.165012	0.103428	0.084109	0.127359	0.0754478	0.0536543	0.0348134	0.139676	0.0715823	0.137786	0.147264	0.110165	0.0860034	0.0931267	0.0587893	0.0431471	0.112461	0.182153	0.145154	0.12092	0.0719166	0.0576626	0.0453485	0.0458827	0.0699767	0.122213	0.138773	Q92614	Unconventional myosin-XVIIIa OS=Homo sapiens OX=9606 GN=MYO18A PE=1 SV=3	unknown	PM	0.253931	unknown
Q13131	0.0480454	0.0593947	0.0642287	0.127491	0.0758722	0.0900799	0.123203	0.12253	0.113703	0.175452	0.0605327	0.044751	0.0927015	0.0949498	0.102343	0.0699153	0.0623054	0.0710827	0.0909287	0.310489	0.0488907	0.0718501	0.111365	0.0751988	0.072771	0.0582252	0.0604228	0.105588	0.15044	0.245249	Q13131	5'-AMP-activated protein kinase catalytic subunit alpha-1 OS=Homo sapiens OX=9606 GN=PRKAA1 PE=1 SV=4	unknown	CYTOSOL	0.55745	unknown
Q13257	0.0504266	0.0722017	0.0938495	0.134216	0.0780593	0.0988157	0.145804	0.0671081	0.0752579	0.184261	0.054302	0.0577734	0.0719068	0.0800893	0.097942	0.0892636	0.0773618	0.0701711	0.0481031	0.353087	0.0540672	0.079646	0.108013	0.0749182	0.0702307	0.0628359	0.0601689	0.0729381	0.0684932	0.348689	Q13257	Mitotic spindle assembly checkpoint protein MAD2A OS=Homo sapiens OX=9606 GN=MAD2L1 PE=1 SV=1	unknown	CYTOSOL	0.846564	unknown
P49257	0.060634	0.115828	0.164629	0.233104	0.154721	0.0995066	0.10907	0.0462682	0.011367	0.00487301	0.0664601	0.082624	0.225095	0.225105	0.164105	0.0933842	0.0669797	0.0253181	0.0128291	0.0381	0.0613971	0.111444	0.246565	0.161721	0.131205	0.0995146	0.0952479	0.0659232	0.0176085	0.0093729	P49257	Protein ERGIC-53 OS=Homo sapiens OX=9606 GN=LMAN1 PE=1 SV=2	unknown	ER	0.828644	unknown
H3BNT4	0.073012	0.0381719	0.0371512	0.0740905	0.0477245	0.0556208	0.111357	0.265605	0.234578	0.062689	0.0668444	0.0328997	0.0561061	0.0525386	0.0646103	0.0657994	0.07261	0.208353	0.218371	0.161868	0.0827573	0.0553662	0.0697433	0.0481615	0.0513744	0.0444293	0.0557232	0.187908	0.222698	0.181839	H3BNT4	M-phase phosphoprotein 6 OS=Homo sapiens OX=9606 GN=MPHOSPH6 PE=1 SV=1	unknown	NUCLEUS	0.938364	NUCLEUS
Q99832	0.0268219	0.033755	0.0406764	0.0827202	0.0524786	0.0602549	0.113869	0.262993	0.251068	0.0753625	0.0360795	0.0325287	0.0636563	0.0588536	0.0721842	0.0571111	0.069205	0.17973	0.245508	0.185144	0.0336398	0.0452793	0.0797859	0.0523464	0.0570855	0.0465964	0.0642223	0.148171	0.280675	0.192199	Q99832	T-complex protein 1 subunit eta OS=Homo sapiens OX=9606 GN=CCT7 PE=1 SV=2	unknown	NUCLEUS	0.850105	unknown
Q9UJX4	0.0601152	0.0520168	0.0551316	0.0794269	0.0661891	0.0780252	0.094845	0.180657	0.212428	0.121165	0.0668952	0.0431048	0.0812903	0.0690726	0.0809677	0.0603629	0.0623387	0.12879	0.203387	0.20379	0.0959866	0.0585228	0.0804212	0.0512742	0.0504349	0.0414314	0.053487	0.12315	0.245765	0.199527	Q9UJX4	Anaphase-promoting complex subunit 5 OS=Homo sapiens OX=9606 GN=ANAPC5 PE=1 SV=2	NUCLEUS	NUCLEUS	1	NUCLEUS
P51991	0.222488	0.0410773	0.0215241	0.0577702	0.067	0.0614837	0.151005	0.264887	0.0912762	0.0214881	0.199548	0.0321838	0.0614659	0.0507453	0.0751213	0.0796398	0.0986223	0.184575	0.165648	0.0524509	0.275159	0.0780884	0.0634135	0.0410984	0.0459073	0.0567	0.106927	0.205893	0.103293	0.0235192	P51991	Heterogeneous nuclear ribonucleoprotein A3 OS=Homo sapiens OX=9606 GN=HNRNPA3 PE=1 SV=2	NUCLEUS	NUCLEUS	1	NUCLEUS
B7ZKQ9	0.0723982	0.116694	0.146225	0.189331	0.125982	0.110026	0.128721	0.0648964	0.0271493	0.0185759	0.137916	0.129246	0.25143	0.212549	0.137201	0.0572935	0.0412049	0.0167143	0.00357526	0.0128709	0.139705	0.190763	0.280115	0.153368	0.0818473	0.0518922	0.0520205	0.0322643	0.00930083	0.00872354	B7ZKQ9	SCARB1 protein OS=Homo sapiens OX=9606 GN=SCARB1 PE=1 SV=1	unknown	PM	0.318011	unknown
Q16533	0.058296	0.0572995	0.0483308	0.0772297	0.0660189	0.0677628	0.0999003	0.254609	0.208271	0.062282	0.0768796	0.05342	0.0664217	0.0700961	0.0870548	0.0531374	0.084511	0.159129	0.201809	0.147541	0.104478	0.0788913	0.0586354	0.0724947	0.0479744	0.0618337	0.0565032	0.134328	0.139659	0.245203	Q16533	snRNA-activating protein complex subunit 1 OS=Homo sapiens OX=9606 GN=SNAPC1 PE=1 SV=1	unknown	NUCLEUS	0.91052	NUCLEUS
Q9P0V9	0.0582933	0.110134	0.152527	0.23289	0.11672	0.0916726	0.148386	0.0531043	0.0247642	0.011509	0.126107	0.0996562	0.217513	0.179029	0.13092	0.0837614	0.0661072	0.0351668	0.0321537	0.0295854	0.0845245	0.104967	0.156447	0.142954	0.146869	0.133612	0.145165	0.0677144	0.0102666	0.00747995	Q9P0V9	Septin-10 OS=Homo sapiens OX=9606 GN=SEPT10 PE=1 SV=2	unknown	ER	0.273334	unknown
Q9Y6D9	0.0736698	0.0725273	0.0999488	0.12795	0.105628	0.0872101	0.193264	0.0936903	0.0771658	0.0689461	0.0923683	0.067041	0.104788	0.102682	0.132099	0.104452	0.117116	0.0728388	0.0765921	0.130023	0.0837542	0.0537717	0.138323	0.080538	0.0793685	0.0916219	0.0825315	0.0858009	0.11387	0.19042	Q9Y6D9	Mitotic spindle assembly checkpoint protein MAD1 OS=Homo sapiens OX=9606 GN=MAD1L1 PE=1 SV=2	unknown	NUCLEUS	0.388885	unknown
P09914	0.0474705	0.03499	0.0583909	0.108536	0.0668598	0.074883	0.145309	0.17807	0.146646	0.138846	0.0431818	0.0472222	0.0936869	0.0931818	0.0856061	0.0732323	0.0666667	0.0911616	0.0808081	0.325253	0.0722111	0.0806974	0.0967443	0.0632618	0.0668107	0.0624904	0.0530782	0.0978244	0.115106	0.291776	P09914	Interferon-induced protein with tetratricopeptide repeats 1 OS=Homo sapiens OX=9606 GN=IFIT1 PE=1 SV=2	unknown	NUCLEUS	0.396095	unknown
M0R0P8	0.0578159	0.0573036	0.0568024	0.0866737	0.0642201	0.066481	0.124976	0.235184	0.210581	0.0399621	0.0819552	0.0395698	0.0800312	0.0788486	0.0801062	0.0696225	0.0815235	0.181518	0.218338	0.0884876	0.0622086	0.0697182	0.106551	0.0679852	0.0668024	0.0631026	0.0691405	0.114212	0.144443	0.235837	M0R0P8	Unconventional myosin-IXb OS=Homo sapiens OX=9606 GN=MYO9B PE=1 SV=1	unknown	NUCLEUS	0.931282	NUCLEUS
Q9BXK5	0.256973	0.329646	0.124677	0.0832064	0.0483604	0.0299437	0.0246439	0.0221928	0.0200066	0.0603511	0.314559	0.215841	0.192709	0.0905096	0.0409021	0.0255361	0.0192627	0.0118837	0.0133484	0.0754477	0.290621	0.247134	0.204369	0.0717385	0.0383225	0.0248425	0.0227766	0.0223117	0.0205557	0.0573288	Q9BXK5	Bcl-2-like protein 13 OS=Homo sapiens OX=9606 GN=BCL2L13 PE=1 SV=1	unknown	MITOCHONDRIA	0.747279	unknown
P61201	0.0390001	0.0463308	0.0564374	0.104455	0.0714362	0.0990875	0.106434	0.0952841	0.126953	0.254582	0.0423066	0.03691	0.0702786	0.0586985	0.0849167	0.0670182	0.0550446	0.057192	0.0948103	0.432824	0.0419458	0.051883	0.0939059	0.0589292	0.0633311	0.0523918	0.0610878	0.0926493	0.143761	0.340115	P61201	COP9 signalosome complex subunit 2 OS=Homo sapiens OX=9606 GN=COPS2 PE=1 SV=1	unknown	CYTOSOL	0.778687	unknown
Q9Y230	0.0654596	0.0461521	0.0554455	0.10408	0.0716943	0.0796693	0.117478	0.157881	0.130513	0.171627	0.0570663	0.0415741	0.0698935	0.0669771	0.0884781	0.0730161	0.0775064	0.0972022	0.114052	0.314234	0.0622828	0.0588349	0.0904196	0.0635143	0.0678867	0.064022	0.0788936	0.127047	0.142624	0.244475	Q9Y230	RuvB-like 2 OS=Homo sapiens OX=9606 GN=RUVBL2 PE=1 SV=3	unknown	NUCLEUS	0.493521	unknown
P38935	0.0229751	0.0361222	0.0358636	0.0809087	0.060994	0.0628475	0.123842	0.297254	0.267813	0.0113798	0.0434289	0.0354811	0.0674141	0.0739427	0.0803293	0.056344	0.065711	0.229634	0.290945	0.0567698	0.0295477	0.0291276	0.0686178	0.0583952	0.0651169	0.0574149	0.0927041	0.236241	0.324184	0.03865	P38935	DNA-binding protein SMUBP-2 OS=Homo sapiens OX=9606 GN=IGHMBP2 PE=1 SV=3	unknown	NUCLEUS	0.900733	NUCLEUS
O14974	0.0783766	0.0760279	0.0882919	0.121492	0.0711819	0.0801513	0.134202	0.123564	0.139941	0.0867722	0.118901	0.0577257	0.0881258	0.0942377	0.0958876	0.0830451	0.0891289	0.113473	0.114926	0.144548	0.090985	0.0974105	0.134711	0.0779573	0.0723672	0.0703351	0.0736201	0.0942701	0.0972097	0.191134	O14974	Protein phosphatase 1 regulatory subunit 12A OS=Homo sapiens OX=9606 GN=PPP1R12A PE=1 SV=1	unknown	NUCLEUS	0.673347	unknown
Q9H223	0.12875	0.0825809	0.0897204	0.139431	0.0897344	0.0818669	0.120253	0.144303	0.104238	0.0191228	0.180675	0.0638304	0.107493	0.109072	0.0987711	0.07013	0.0753471	0.124085	0.131059	0.0395368	0.180058	0.139114	0.16275	0.107645	0.0855406	0.0744698	0.0803465	0.0853284	0.0579281	0.0268191	Q9H223	EH domain-containing protein 4 OS=Homo sapiens OX=9606 GN=EHD4 PE=1 SV=1	unknown	NUCLEUS-CHROMATIN	0.333874	unknown
Q96GA3	0.0195365	0.0322735	0.0385941	0.0694311	0.0475962	0.0526719	0.0640682	0.198334	0.377322	0.100172	0.040375	0.0323383	0.0608496	0.0476464	0.0579793	0.0553004	0.0499426	0.150402	0.314007	0.19116	0.0256024	0.0224096	0.0436747	0.0268675	0.0338353	0.0249598	0.0264659	0.129498	0.560161	0.106526	Q96GA3	Protein LTV1 homolog OS=Homo sapiens OX=9606 GN=LTV1 PE=1 SV=1	unknown	NUCLEUS	0.296037	unknown
Q96DZ1	0.0585414	0.111007	0.173546	0.306856	0.144688	0.0881985	0.0693064	0.0204642	0.0160942	0.0112979	0.0590742	0.0937871	0.201162	0.245864	0.210066	0.083938	0.0545919	0.0102712	0.0114772	0.0297682	0.0738005	0.122391	0.23753	0.197547	0.140519	0.0870155	0.0637707	0.0276159	0.02172	0.0280903	Q96DZ1	Endoplasmic reticulum lectin 1 OS=Homo sapiens OX=9606 GN=ERLEC1 PE=1 SV=1	ER	ER	1	ER
Q9UKV5	0.054424	0.116194	0.185643	0.256427	0.176628	0.112187	0.0651085	0.0136895	0.00901503	0.0106845	0.0597066	0.0807395	0.2239	0.274786	0.177932	0.0881181	0.0616572	0.011195	0.00602154	0.0159444	0.0647116	0.117644	0.233382	0.188563	0.153568	0.110802	0.0805963	0.026002	0.0153959	0.00933529	Q9UKV5	E3 ubiquitin-protein ligase AMFR OS=Homo sapiens OX=9606 GN=AMFR PE=1 SV=2	unknown	ER	0.876666	unknown
Q9UKG1	0.0366875	0.0578286	0.0813189	0.115102	0.0899035	0.106261	0.095413	0.0497566	0.0509951	0.316734	0.0355293	0.039521	0.0810226	0.0576208	0.0815711	0.0851971	0.0581998	0.0336096	0.046377	0.481352	0.0570678	0.0649453	0.115011	0.0665208	0.0607877	0.0675274	0.0550985	0.0593873	0.0611816	0.392473	Q9UKG1	DCC-interacting protein 13-alpha OS=Homo sapiens OX=9606 GN=APPL1 PE=1 SV=1	unknown	CYTOSOL	0.920253	CYTOSOL
Q96JN8	0.0463749	0.0904637	0.104507	0.207381	0.0927498	0.0558459	0.0986283	0.154801	0.128674	0.0205748	0.056966	0.0799545	0.138942	0.168751	0.139952	0.0742706	0.0551977	0.078944	0.1325	0.0745232	0.0560544	0.0753741	0.158095	0.105034	0.102041	0.0740136	0.0688435	0.131973	0.181769	0.0468027	Q96JN8	Neuralized-like protein 4 OS=Homo sapiens OX=9606 GN=NEURL4 PE=1 SV=2	unknown	NUCLEUS	0.355651	unknown
E9PP21	0.223677	0.204668	0.139121	0.154223	0.0584011	0.0390045	0.0554793	0.05995	0.0451297	0.0203471	0.405685	0.131866	0.11976	0.102273	0.0603506	0.0348384	0.0289647	0.0405327	0.0438954	0.0318343	0.239504	0.294394	0.209883	0.090173	0.0373015	0.019067	0.0220853	0.0324306	0.0258945	0.0292667	E9PP21	Cysteine and glycine-rich protein 1 OS=Homo sapiens OX=9606 GN=CSRP1 PE=1 SV=1	unknown	NUCLEUS-CHROMATIN	0.367713	unknown
Q9NWV4	0.0327686	0.0562862	0.0687695	0.136759	0.0765716	0.113798	0.102095	0.055506	0.0348863	0.322559	0.0448363	0.0517772	0.0787573	0.0746711	0.102547	0.0996362	0.0830675	0.0426532	0.0425413	0.379513	0.0372829	0.06732	0.100421	0.0623404	0.0710866	0.056882	0.0605848	0.0606805	0.0512002	0.432201	Q9NWV4	UPF0587 protein C1orf123 OS=Homo sapiens OX=9606 GN=C1orf123 PE=1 SV=1	unknown	CYTOSOL	0.925714	CYTOSOL
A6NKD9	0.0333871	0.032466	0.0448998	0.0699977	0.0453603	0.0460511	0.105457	0.296339	0.273774	0.052268	0.04736	0.0326432	0.0565971	0.0614505	0.0698657	0.0742103	0.0901797	0.243728	0.238796	0.0851697	0.0593298	0.0644058	0.0943833	0.0736381	0.0733807	0.0722404	0.101262	0.203222	0.175709	0.0824291	A6NKD9	Coiled-coil domain-containing protein 85C OS=Homo sapiens OX=9606 GN=CCDC85C PE=1 SV=1	unknown	NUCLEUS	0.956429	NUCLEUS
Q13347	0.017282	0.0310344	0.0548652	0.0758545	0.0535666	0.0926537	0.151049	0.18316	0.272395	0.0681403	0.0275478	0.0327587	0.0594894	0.0639233	0.0894015	0.0755773	0.11346	0.152019	0.236357	0.149467	0.0271985	0.041129	0.0706142	0.0559639	0.0565372	0.0538492	0.0753914	0.190415	0.295597	0.133304	Q13347	Eukaryotic translation initiation factor 3 subunit I OS=Homo sapiens OX=9606 GN=EIF3I PE=1 SV=1	unknown	NUCLEUS	0.892384	NUCLEUS
J3KNN5	0.037842	0.0342818	0.0435365	0.0782585	0.0476136	0.0523319	0.121623	0.284983	0.27323	0.0262999	0.0490233	0.0367181	0.0673511	0.0617966	0.0694626	0.0528095	0.0720943	0.220932	0.287098	0.0827144	0.038013	0.0392025	0.0652334	0.0546071	0.0621897	0.0630935	0.091251	0.229247	0.299492	0.0576707	J3KNN5	Probable ATP-dependent RNA helicase DDX41 (Fragment) OS=Homo sapiens OX=9606 GN=DDX41 PE=1 SV=1	unknown	NUCLEUS	0.929861	NUCLEUS
Q9BX10	0.0445315	0.0441753	0.0560504	0.0789692	0.0504691	0.0589004	0.113288	0.27847	0.254958	0.0201876	0.0653801	0.0445029	0.0668421	0.067076	0.0752047	0.0584795	0.0722807	0.225088	0.279064	0.0460819	0.0472862	0.0606497	0.0651727	0.063528	0.0739104	0.0762747	0.113178	0.206723	0.24301	0.0502673	Q9BX10	GTP-binding protein 2 OS=Homo sapiens OX=9606 GN=GTPBP2 PE=1 SV=1	unknown	NUCLEUS	0.952628	NUCLEUS
Q7KZ85	0.154297	0.0571293	0.0593767	0.106925	0.0642262	0.0872908	0.0888284	0.0474895	0.0496185	0.284819	0.0785123	0.0380221	0.0634907	0.0546607	0.078257	0.0693632	0.0494053	0.03149	0.0437031	0.493096	0.169139	0.0969123	0.0773825	0.0521988	0.0563994	0.0442954	0.0453903	0.0617746	0.0735203	0.322988	Q7KZ85	Transcription elongation factor SPT6 OS=Homo sapiens OX=9606 GN=SUPT6H PE=1 SV=2	unknown	CYTOSOL	0.72114	unknown
Q14517	0.0624331	0.131825	0.190024	0.29129	0.131679	0.073674	0.0682238	0.0216545	0.00768856	0.0215085	0.0657986	0.0894215	0.237324	0.249597	0.161212	0.0702351	0.0456326	0.0216064	0.0179189	0.0412537	0.0738621	0.130736	0.245591	0.183455	0.134152	0.0841104	0.0585357	0.0311144	0.0181885	0.0402548	Q14517	Protocadherin Fat 1 OS=Homo sapiens OX=9606 GN=FAT1 PE=1 SV=2	unknown	ER	0.952699	ER
Q15149-4	0.205882	0.0762032	0.078877	0.0454545	0.0708556	0.153743	0.0962567	0.100267	0.124332	0.0481283	0.158654	0.0592949	0.0865385	0.113782	0.0913462	0.0833333	0.0753205	0.088141	0.112179	0.13141	0.185528	0.155604	0.0816104	0.0576714	0.0538629	0.0565832	0.0522307	0.119151	0.14309	0.0946681	Q15149-4	Isoform 4 of Plectin OS=Homo sapiens OX=9606 GN=PLEC	unknown	NUCLEUS	0.373105	unknown
Q15262	0.105961	0.118561	0.129896	0.181257	0.116334	0.0968019	0.11932	0.0585467	0.0280842	0.0452383	0.167774	0.0913023	0.171739	0.169525	0.130954	0.0793553	0.0615892	0.0353777	0.0217828	0.070601	0.152072	0.18103	0.214045	0.132409	0.0884689	0.059511	0.0579157	0.0406104	0.0251777	0.0487602	Q15262	Receptor-type tyrosine-protein phosphatase kappa OS=Homo sapiens OX=9606 GN=PTPRK PE=1 SV=2	unknown	PM	0.734	PM
Q6ZMI0	0.0429295	0.0540594	0.0639968	0.13018	0.0767167	0.0782073	0.174699	0.18414	0.166253	0.0288184	0.0688937	0.0562576	0.104517	0.129453	0.110095	0.0770937	0.0912757	0.149079	0.140946	0.0723888	0.0618354	0.0890414	0.136271	0.123029	0.111593	0.091449	0.105654	0.142611	0.0879579	0.0505598	Q6ZMI0	Protein phosphatase 1 regulatory subunit 21 OS=Homo sapiens OX=9606 GN=PPP1R21 PE=1 SV=1	unknown	RIBOSOME	0.50537	unknown
Q9HAB8	0.0525565	0.0664685	0.0720571	0.101784	0.0841855	0.0920333	0.0878716	0.0933413	0.0888228	0.26088	0.049394	0.0472332	0.0811979	0.0811979	0.115905	0.100544	0.0811304	0.0678281	0.0889294	0.28664	0.0379335	0.0660184	0.105997	0.0698994	0.0733214	0.0532488	0.0590911	0.0720694	0.0684806	0.393941	Q9HAB8	Phosphopantothenate--cysteine ligase OS=Homo sapiens OX=9606 GN=PPCS PE=1 SV=2	CYTOSOL	CYTOSOL	1	CYTOSOL
Q9Y5B8	0.0348708	0.0535873	0.063057	0.100713	0.0522504	0.0727496	0.136029	0.223151	0.158757	0.104835	0.0579963	0.0381266	0.0719954	0.0614799	0.0828979	0.0607703	0.0692213	0.134056	0.142378	0.281079	0.0574125	0.0685542	0.111155	0.0777297	0.0827107	0.0824486	0.10932	0.142352	0.0913619	0.176956	Q9Y5B8	Nucleoside diphosphate kinase 7 OS=Homo sapiens OX=9606 GN=NME7 PE=1 SV=1	unknown	NUCLEUS	0.849405	unknown
Q9H7D0	0.0572053	0.0642084	0.0623761	0.103893	0.073797	0.0699817	0.139436	0.221868	0.186727	0.0205075	0.087738	0.0452188	0.0821256	0.084843	0.0833689	0.0631039	0.0817882	0.195155	0.23144	0.0452188	0.12424	0.0869618	0.101719	0.0743939	0.0718398	0.0736236	0.105408	0.168937	0.162471	0.0304062	Q9H7D0	Dedicator of cytokinesis protein 5 OS=Homo sapiens OX=9606 GN=DOCK5 PE=1 SV=3	unknown	NUCLEUS	0.956645	NUCLEUS
Q96P16	0.0784219	0.06185	0.0540147	0.093191	0.0612259	0.0814727	0.12155	0.142768	0.167244	0.138261	0.0630365	0.0449303	0.0706813	0.048015	0.076985	0.0751744	0.0742355	0.11541	0.14371	0.287822	0.0968531	0.0771113	0.0927191	0.0635282	0.0677466	0.0615034	0.066228	0.106977	0.150004	0.217329	Q96P16	Regulation of nuclear pre-mRNA domain-containing protein 1A OS=Homo sapiens OX=9606 GN=RPRD1A PE=1 SV=1	unknown	NUCLEUS	0.718704	unknown
P35270	0.0980257	0.124914	0.0911449	0.0929445	0.058699	0.0877044	0.0859578	0.0305933	0.0337162	0.2963	0.135755	0.0990343	0.107181	0.0629098	0.0814291	0.0744744	0.05981	0.0335413	0.0370782	0.308787	0.106132	0.133975	0.122908	0.0585797	0.0611215	0.0540435	0.0546692	0.055334	0.0459096	0.307328	P35270	Sepiapterin reductase OS=Homo sapiens OX=9606 GN=SPR PE=1 SV=1	unknown	CYTOSOL	0.754439	unknown
E7EM64	0.0547766	0.0491545	0.0443768	0.089598	0.079776	0.0746206	0.100598	0.11082	0.110598	0.285683	0.0437961	0.0429546	0.0767923	0.0560689	0.0861721	0.0660799	0.0536319	0.0560513	0.0977085	0.420744	0.0417753	0.0490899	0.0892224	0.0572129	0.0598336	0.0537447	0.0568087	0.0912694	0.138977	0.362066	E7EM64	COP9 signalosome complex subunit 6 OS=Homo sapiens OX=9606 GN=COPS6 PE=1 SV=1	unknown	CYTOSOL	0.754453	unknown
Q8NE71	0.0274442	0.0372597	0.0485951	0.0889829	0.0613487	0.0709416	0.150624	0.230176	0.251206	0.0334225	0.0453175	0.0364439	0.073538	0.0817499	0.0802364	0.0670296	0.0819167	0.192037	0.256506	0.0852256	0.0293699	0.0344183	0.0517293	0.0385234	0.0401996	0.03359	0.0467302	0.221592	0.453778	0.0500695	Q8NE71	ATP-binding cassette sub-family F member 1 OS=Homo sapiens OX=9606 GN=ABCF1 PE=1 SV=2	unknown	NUCLEUS	0.73591	unknown
Q9NVG8	0.0312136	0.0600978	0.0554391	0.0880503	0.0847892	0.12532	0.0833916	0.0414628	0.0400652	0.39017	0.0259259	0.0430199	0.0712251	0.0504274	0.0706553	0.0521368	0.0524217	0.0364672	0.042735	0.554986	0.0339468	0.0481508	0.105056	0.0647668	0.0688762	0.0601215	0.0650348	0.0582455	0.0537788	0.442023	Q9NVG8	TBC1 domain family member 13 OS=Homo sapiens OX=9606 GN=TBC1D13 PE=1 SV=3	unknown	CYTOSOL	0.82519	unknown
A0A0A0MT60	0.0413736	0.0822463	0.122301	0.238452	0.139537	0.106472	0.12222	0.066675	0.0572321	0.0234895	0.0651392	0.0736919	0.164031	0.195851	0.157948	0.0911444	0.0645632	0.0621568	0.0812267	0.0442467	0.0467269	0.0915334	0.220646	0.186072	0.151989	0.107703	0.0829943	0.0409731	0.0397564	0.0316057	A0A0A0MT60	Peptidylprolyl isomerase (Fragment) OS=Homo sapiens OX=9606 GN=FKBP15 PE=1 SV=1	unknown	ER	0.596912	unknown
P19387	0.130931	0.0517079	0.0535918	0.0849735	0.0660354	0.0809578	0.0863616	0.110654	0.112885	0.221903	0.0757632	0.0413979	0.0703581	0.0550028	0.0841779	0.0770837	0.0752411	0.0738898	0.0993489	0.347737	0.102079	0.0645877	0.0916842	0.0526162	0.0590983	0.0541929	0.0588064	0.0834501	0.116445	0.31704	P19387	DNA-directed RNA polymerase II subunit RPB3 OS=Homo sapiens OX=9606 GN=POLR2C PE=1 SV=2	unknown	CYTOSOL	0.657227	unknown
O75976	0.0581699	0.15156	0.164398	0.176941	0.127292	0.106955	0.152173	0.0513986	0.00470358	0.00640778	0.0815362	0.0899104	0.202692	0.181059	0.153573	0.106726	0.107739	0.0367386	0.0157129	0.0243123	0.0784235	0.144967	0.281507	0.157184	0.101026	0.0758958	0.0780654	0.0566638	0.0123017	0.0139658	O75976	Carboxypeptidase D OS=Homo sapiens OX=9606 GN=CPD PE=1 SV=2	unknown	PM	0.400527	unknown
O15182	0.0538238	0.0704059	0.0545487	0.0897064	0.0654223	0.0598043	0.121874	0.27075	0.182675	0.0309895	0.0730932	0.0492585	0.0811706	0.0707097	0.0839513	0.0794492	0.0929555	0.185249	0.199285	0.0848782	0.0587391	0.0569612	0.0983315	0.0850656	0.0852024	0.0895104	0.111119	0.182577	0.151532	0.0809628	O15182	Centrin-3 OS=Homo sapiens OX=9606 GN=CETN3 PE=1 SV=2	unknown	NUCLEUS	0.924565	NUCLEUS
P63165	0.117952	0.0485371	0.0509107	0.0941678	0.0702383	0.0744526	0.104631	0.129965	0.084722	0.224424	0.0852759	0.0288409	0.071235	0.0386534	0.0676027	0.0832159	0.0675485	0.121923	0.117586	0.318118	0.196123	0.0640046	0.0816978	0.041574	0.04723	0.0506139	0.0621193	0.139611	0.142173	0.174853	P63165	Small ubiquitin-related modifier 1 OS=Homo sapiens OX=9606 GN=SUMO1 PE=1 SV=1	unknown	NUCLEUS	0.498617	unknown
Q53GS9	0.0413402	0.0309326	0.0369375	0.0785931	0.0448725	0.0649182	0.163973	0.270522	0.242466	0.025445	0.0549125	0.0303862	0.0618256	0.0624979	0.0793268	0.0639321	0.0935452	0.218821	0.254373	0.0803801	0.0594406	0.0478398	0.0599483	0.0555513	0.0680812	0.0650637	0.106504	0.228116	0.255858	0.0535971	Q53GS9	U4/U6.U5 tri-snRNP-associated protein 2 OS=Homo sapiens OX=9606 GN=USP39 PE=1 SV=2	unknown	NUCLEUS	0.964454	NUCLEUS
Q99543	0.0340449	0.0409066	0.0538539	0.102072	0.0686331	0.0834433	0.162897	0.224777	0.190468	0.038904	0.0529394	0.0378925	0.083102	0.0817946	0.0924146	0.073239	0.0914512	0.167397	0.208592	0.111177	0.0387713	0.0451942	0.0799541	0.07677	0.0905991	0.0930808	0.138064	0.183914	0.191203	0.0624493	Q99543	DnaJ homolog subfamily C member 2 OS=Homo sapiens OX=9606 GN=DNAJC2 PE=1 SV=4	unknown	RIBOSOME	0.718903	unknown
P42892	0.0840931	0.104358	0.128521	0.184583	0.149866	0.125335	0.14952	0.0494189	0.0126923	0.0116121	0.122574	0.0788757	0.171956	0.200341	0.169714	0.104137	0.0989758	0.0233944	0.0105271	0.0195049	0.111108	0.135036	0.220658	0.154237	0.122492	0.0909849	0.0840973	0.046704	0.0157057	0.0189787	P42892	Endothelin-converting enzyme 1 OS=Homo sapiens OX=9606 GN=ECE1 PE=1 SV=2	unknown	PM	0.552687	unknown
P52298	0.0603863	0.0367307	0.0394567	0.080207	0.0608021	0.0741545	0.157642	0.227731	0.166975	0.0959157	0.0525099	0.0378907	0.0605654	0.0660103	0.0855523	0.057731	0.0979339	0.151339	0.152458	0.23801	0.0788393	0.0565	0.0732857	0.0533571	0.0617143	0.0554821	0.0936429	0.180929	0.135393	0.210857	P52298	Nuclear cap-binding protein subunit 2 OS=Homo sapiens OX=9606 GN=NCBP2 PE=1 SV=1	unknown	NUCLEUS	0.944141	NUCLEUS
Q96AX1	0.0387418	0.0751903	0.1058	0.1644	0.0753529	0.0686032	0.11551	0.193335	0.152349	0.0107182	0.0617841	0.0752707	0.153868	0.127922	0.0951211	0.0596628	0.065714	0.150184	0.167199	0.0432734	0.050254	0.0921053	0.163269	0.127768	0.102397	0.0907048	0.102788	0.137734	0.103472	0.0295076	Q96AX1	Vacuolar protein sorting-associated protein 33A OS=Homo sapiens OX=9606 GN=VPS33A PE=1 SV=1	unknown	NUCLEUS	0.372897	unknown
Q2M389	0.0475754	0.0832896	0.116959	0.211245	0.124273	0.0955308	0.109358	0.0707208	0.0752163	0.0658322	0.0690794	0.0675881	0.159942	0.172832	0.13467	0.0797049	0.0569892	0.0413571	0.0667359	0.151101	0.0482518	0.0949503	0.201187	0.165362	0.134295	0.0954711	0.0639018	0.042281	0.0527412	0.101559	Q2M389	WASH complex subunit 4 OS=Homo sapiens OX=9606 GN=WASHC4 PE=1 SV=2	unknown	ER	0.406044	unknown
Q96MW5	0.0560475	0.101836	0.0888769	0.0993521	0.0727862	0.0740821	0.10432	0.128078	0.110259	0.164363	0.0767616	0.0540802	0.0989588	0.0816046	0.0846719	0.0634434	0.0718379	0.0737751	0.088627	0.306239	0.0615965	0.111321	0.152253	0.0779395	0.0556356	0.0523074	0.0606527	0.0881228	0.0943818	0.24579	Q96MW5	Conserved oligomeric Golgi complex subunit 8 OS=Homo sapiens OX=9606 GN=COG8 PE=1 SV=2	unknown	CYTOSOL	0.429684	unknown
O75348	0.0412537	0.0997926	0.129984	0.186448	0.0913805	0.0747868	0.109472	0.104287	0.0829684	0.0796266	0.0548217	0.0928831	0.182711	0.143329	0.106258	0.0669584	0.0719122	0.061179	0.0780218	0.141925	0.0551271	0.112254	0.190517	0.112539	0.0619823	0.0588403	0.0574122	0.0916881	0.109683	0.149957	O75348	V-type proton ATPase subunit G 1 OS=Homo sapiens OX=9606 GN=ATP6V1G1 PE=1 SV=3	unknown	GOLGI	0.214077	unknown
O43520	0.11311	0.125765	0.149767	0.196256	0.108037	0.102076	0.137322	0.0417299	0.0164723	0.00946504	0.208636	0.0974539	0.164099	0.160667	0.11645	0.0810121	0.0734296	0.0218693	0.0197941	0.0565887	0.202454	0.208626	0.2077	0.115578	0.077386	0.0503819	0.0502276	0.0362626	0.0267726	0.0246123	O43520	Phospholipid-transporting ATPase IC OS=Homo sapiens OX=9606 GN=ATP8B1 PE=1 SV=3	unknown	PM	0.839356	PM
P17980	0.0233157	0.0376389	0.0431152	0.0706462	0.0614881	0.0703916	0.0729378	0.137962	0.257172	0.225332	0.0277972	0.033135	0.0604035	0.0511109	0.0723068	0.0600062	0.052452	0.0789499	0.20028	0.363559	0.0309539	0.0439882	0.0761108	0.0472731	0.0483856	0.0412017	0.0448375	0.10233	0.310862	0.254057	P17980	26S proteasome regulatory subunit 6A OS=Homo sapiens OX=9606 GN=PSMC3 PE=1 SV=3	unknown	PROTEASOME	0.826614	PROTEASOME
Q9NZ45	0.212147	0.320508	0.153976	0.117514	0.0499707	0.037414	0.0419534	0.0286279	0.0239786	0.0139113	0.295775	0.210564	0.208418	0.117126	0.0638289	0.028099	0.019872	0.0146656	0.016613	0.0250388	0.26153	0.305024	0.191789	0.0860517	0.0416198	0.032246	0.0298088	0.016123	0.0151856	0.0206224	Q9NZ45	CDGSH iron-sulfur domain-containing protein 1 OS=Homo sapiens OX=9606 GN=CISD1 PE=1 SV=1	unknown	MITOCHONDRIA	0.518599	unknown
Q9UJX2	0.0950079	0.0594856	0.0539426	0.0818941	0.055058	0.0638456	0.0856457	0.178727	0.233177	0.0932166	0.0768388	0.0343089	0.0682889	0.0636304	0.0786474	0.0600132	0.0647813	0.132687	0.220322	0.200482	0.103837	0.0726777	0.0757129	0.0521274	0.0533526	0.0466139	0.0497884	0.128174	0.225858	0.191858	Q9UJX2	Cell division cycle protein 23 homolog OS=Homo sapiens OX=9606 GN=CDC23 PE=1 SV=3	unknown	NUCLEUS	0.753349	unknown
P54725-3	0.0287692	0.0623767	0.0863076	0.117831	0.0942722	0.115523	0.12159	0.0371804	0.0651308	0.271019	0.0345884	0.0605298	0.0911778	0.0934764	0.149847	0.106173	0.134413	0.0423599	0.0444396	0.242995	0.0461387	0.0964089	0.151908	0.104758	0.0956288	0.076792	0.0766186	0.0899373	0.0884061	0.173403	P54725-3	Isoform 3 of UV excision repair protein RAD23 homolog A OS=Homo sapiens OX=9606 GN=RAD23A	unknown	CYTOSOL	0.781565	unknown
A8MUM1	0.0585425	0.0582615	0.0570438	0.0904833	0.0806482	0.0784001	0.130667	0.240914	0.158205	0.046834	0.0756506	0.0539191	0.0804104	0.0804885	0.0957825	0.0643362	0.0975772	0.1973	0.175608	0.0789279	0.0561998	0.0558281	0.0893547	0.0877565	0.0896893	0.0950416	0.142135	0.202832	0.129646	0.0515165	A8MUM1	EARP-interacting protein OS=Homo sapiens OX=9606 GN=EIPR1 PE=1 SV=2	unknown	RIBOSOME	0.569826	unknown
Q8N5I2	0.0453566	0.0531555	0.0753207	0.122422	0.0716265	0.0751154	0.119446	0.221857	0.18471	0.0309903	0.062142	0.0505918	0.0904926	0.0987973	0.091638	0.0754105	0.0965063	0.18509	0.206376	0.0429553	0.129359	0.121506	0.168707	0.105548	0.0836781	0.0730389	0.0924597	0.118044	0.0802162	0.0274424	Q8N5I2	Arrestin domain-containing protein 1 OS=Homo sapiens OX=9606 GN=ARRDC1 PE=1 SV=1	unknown	NUCLEUS	0.835688	unknown
A8K727	0.0305902	0.0393303	0.0533242	0.0962388	0.0764509	0.0737504	0.1448	0.212904	0.187126	0.0854856	0.0591091	0.0711833	0.117931	0.0960184	0.0792327	0.0585022	0.0699376	0.131315	0.158785	0.157986	0.03648	0.0550931	0.0958926	0.0660096	0.0632608	0.0656169	0.0910626	0.132137	0.146156	0.248292	A8K727	Pleckstrin homology domain-containing family A member 2 OS=Homo sapiens OX=9606 GN=PLEKHA2 PE=1 SV=1	unknown	NUCLEUS	0.882563	NUCLEUS
J3QRU4	0.0858976	0.0993875	0.103981	0.148753	0.158378	0.103653	0.167748	0.101539	0.0172452	0.0134169	0.123727	0.0759158	0.164426	0.181088	0.146981	0.112003	0.121509	0.0430697	0.0181415	0.0131384	0.106698	0.139552	0.21411	0.142409	0.104462	0.084961	0.105642	0.0791231	0.0197808	0.00326057	J3QRU4	Vesicle-associated membrane protein 2 OS=Homo sapiens OX=9606 GN=VAMP2 PE=4 SV=2	unknown	PM	0.468109	unknown
O95292	0.0607648	0.105308	0.15821	0.299929	0.160896	0.0969178	0.0792908	0.0189599	0.0106734	0.00905118	0.0669384	0.0851212	0.216995	0.281041	0.169075	0.0867221	0.0495445	0.015182	0.0101084	0.0192733	0.0788244	0.127477	0.250057	0.178968	0.135046	0.0845768	0.0695359	0.0340959	0.0166955	0.0247237	O95292	Vesicle-associated membrane protein-associated protein B/C OS=Homo sapiens OX=9606 GN=VAPB PE=1 SV=3	ER	ER	1	ER
Q9NR30	0.232926	0.0558717	0.0358097	0.0668599	0.0374915	0.0513315	0.120179	0.194743	0.192683	0.012105	0.220507	0.0395429	0.0552879	0.0616848	0.0664032	0.0550378	0.090079	0.183832	0.180308	0.0473181	0.242254	0.109954	0.0507562	0.0425662	0.0500109	0.0435879	0.0839223	0.199696	0.158214	0.0190388	Q9NR30	Nucleolar RNA helicase 2 OS=Homo sapiens OX=9606 GN=DDX21 PE=1 SV=5	NUCLEUS	NUCLEUS	1	NUCLEUS
F8VW96	0.212907	0.165089	0.111616	0.119852	0.0692071	0.0390904	0.0692071	0.109896	0.0888752	0.0142594	0.373236	0.120728	0.106274	0.0964122	0.0612141	0.0351981	0.034688	0.0746472	0.0601938	0.0374086	0.240482	0.228609	0.205553	0.0862546	0.0417138	0.031411	0.0452946	0.0564769	0.0465511	0.017653	F8VW96	Cysteine and glycine-rich protein 2 OS=Homo sapiens OX=9606 GN=CSRP2 PE=1 SV=1	unknown	NUCLEUS-CHROMATIN	0.592423	NUCLEUS-CHROMATIN
Q02388	0.0588782	0.175628	0.222819	0.284586	0.128877	0.06071	0.0323804	0.0134166	0.0100366	0.0126684	0.0813243	0.114899	0.26477	0.265983	0.123525	0.0506412	0.0268594	0.0101189	0.0112847	0.0505945	0.089857	0.179828	0.32437	0.19798	0.10177	0.045042	0.0237123	0.0130474	0.0124234	0.0119696	Q02388	Collagen alpha-1(VII) chain OS=Homo sapiens OX=9606 GN=COL7A1 PE=1 SV=2	unknown	PEROXISOME	0.648822	PEROXISOME
O00571	0.026683	0.0364156	0.0525936	0.0844887	0.052423	0.0617634	0.149644	0.26815	0.253209	0.0146303	0.0505691	0.0372525	0.0661113	0.0708166	0.0780571	0.0663913	0.100659	0.231655	0.243424	0.0550645	0.0444931	0.058518	0.0928511	0.0784033	0.0843292	0.0854157	0.134807	0.227749	0.168179	0.0252551	O00571	ATP-dependent RNA helicase DDX3X OS=Homo sapiens OX=9606 GN=DDX3X PE=1 SV=3	unknown	NUCLEUS	0.892421	NUCLEUS
Q8TAF3	0.0703819	0.0620787	0.0694539	0.129188	0.079369	0.0935821	0.146137	0.152975	0.151167	0.0456677	0.0913798	0.0596138	0.0986566	0.11468	0.0987965	0.0731178	0.0884411	0.112161	0.13602	0.127134	0.107013	0.102797	0.110653	0.0893849	0.0803794	0.064476	0.0790381	0.109983	0.153286	0.102989	Q8TAF3	WD repeat-containing protein 48 OS=Homo sapiens OX=9606 GN=WDR48 PE=1 SV=1	unknown	NUCLEUS	0.832343	unknown
cRAP013	0.0674774	0.11377	0.0408003	0.069439	0.0725775	0.0474696	0.0490388	0.107493	0.0561004	0.375834	0.0727763	0.0678542	0.0903551	0.0864878	0.0924645	0.113559	0.11977	0.100902	0.101488	0.154342	0.0704225	0.113615	0.162441	0.0910798	0.0657277	0.0732394	0.0816901	0.0751174	0.0413146	0.225352	cRAP013	Alpha-S1-casein OS=Bos taurus GN=CSN1S1 PE=1 SV=2	unknown	CYTOSOL	0.547911	unknown
O96013	0.0439118	0.0442962	0.0560995	0.09316	0.0584511	0.0636066	0.137004	0.258383	0.228287	0.0168005	0.0825611	0.039271	0.0693033	0.0839567	0.0765044	0.0707826	0.0943117	0.216172	0.217456	0.0496818	0.0887532	0.0838673	0.105485	0.0799263	0.083245	0.0898133	0.138327	0.169209	0.144434	0.0169394	O96013	Serine/threonine-protein kinase PAK 4 OS=Homo sapiens OX=9606 GN=PAK4 PE=1 SV=1	unknown	NUCLEUS	0.841163	unknown
P08865	0.0281197	0.0429092	0.0682983	0.106755	0.0797587	0.0890602	0.166613	0.179156	0.204041	0.0352891	0.0443851	0.0442575	0.090254	0.0985556	0.106485	0.0786232	0.112553	0.128077	0.187443	0.109367	0.0352565	0.0540184	0.0950066	0.0878502	0.0929477	0.0901316	0.139459	0.199508	0.172496	0.0333254	P08865	40S ribosomal protein SA OS=Homo sapiens OX=9606 GN=RPSA PE=1 SV=4	RIBOSOME	RIBOSOME	1	RIBOSOME
M0QZ22	0.0266889	0.0393788	0.0515363	0.100854	0.0694176	0.0728785	0.170227	0.240732	0.204437	0.0238491	0.0469451	0.0433292	0.0824813	0.0917706	0.0951372	0.0700748	0.104863	0.195137	0.197257	0.073005	0.0477506	0.047025	0.0896964	0.0759656	0.0765238	0.0783936	0.103874	0.212743	0.163708	0.10432	M0QZ22	Protein Smaug homolog 2 OS=Homo sapiens OX=9606 GN=SAMD4B PE=1 SV=1	unknown	NUCLEUS	0.904906	NUCLEUS
B7Z6Z4	0.0893151	0.0923468	0.109752	0.176989	0.1084	0.076577	0.101429	0.05849	0.0363414	0.15036	0.104138	0.0683533	0.128285	0.136693	0.10848	0.0747987	0.0787115	0.0502633	0.0400324	0.210246	0.102012	0.0941331	0.14209	0.0798168	0.0628798	0.0486525	0.0509128	0.0496533	0.0597672	0.310082	B7Z6Z4	Myosin light polypeptide 6 OS=Homo sapiens OX=9606 GN=MYL6 PE=1 SV=1	unknown	CYTOSOL	0.405385	unknown
P18031	0.0726338	0.116009	0.173164	0.296303	0.139809	0.0811421	0.0729489	0.021952	0.0106609	0.0153771	0.0785351	0.092782	0.230972	0.26478	0.17613	0.0706565	0.0461083	0.011715	0.0103912	0.0179292	0.0863032	0.151643	0.234522	0.201286	0.139335	0.0836928	0.0620263	0.0239097	0.00942849	0.00785339	P18031	Tyrosine-protein phosphatase non-receptor type 1 OS=Homo sapiens OX=9606 GN=PTPN1 PE=1 SV=1	ER	ER	1	ER
P30085	0.0381885	0.0550152	0.068415	0.106829	0.0748379	0.0958713	0.106686	0.0655011	0.0540712	0.334585	0.0436153	0.0424385	0.0718447	0.058086	0.0798791	0.0716704	0.0600038	0.0390824	0.0481338	0.485246	0.0536889	0.0811079	0.145851	0.0817616	0.0881211	0.0658333	0.0773239	0.0815041	0.0631587	0.261649	P30085	UMP-CMP kinase OS=Homo sapiens OX=9606 GN=CMPK1 PE=1 SV=3	unknown	CYTOSOL	0.893302	CYTOSOL
F8WA39	0.0379975	0.0513746	0.0838326	0.1103	0.0704144	0.0802216	0.129832	0.160607	0.19007	0.0853508	0.0510603	0.0385025	0.0826916	0.0733325	0.106504	0.0829286	0.0836394	0.130435	0.161829	0.189077	0.0494074	0.0730505	0.105864	0.0747973	0.0711167	0.0786026	0.0781036	0.111915	0.123082	0.234061	F8WA39	Myotubularin-related protein 1 OS=Homo sapiens OX=9606 GN=MTMR1 PE=1 SV=1	unknown	NUCLEUS	0.821056	unknown
A2ACR1	0.0234775	0.0319096	0.0439239	0.0637641	0.0569303	0.0822265	0.0833839	0.112648	0.284155	0.217581	0.0293359	0.0386216	0.0584998	0.0505898	0.0726003	0.0571242	0.048939	0.0776215	0.201706	0.364962	0.0358812	0.0442858	0.0767287	0.0433454	0.0443445	0.0412589	0.0399365	0.0910988	0.286403	0.296718	A2ACR1	Proteasome subunit beta type OS=Homo sapiens OX=9606 GN=PSMB9 PE=1 SV=1	unknown	PROTEASOME	0.802517	PROTEASOME
A3KMH1	0.278412	0.359445	0.130462	0.0934859	0.0338518	0.0184319	0.0243212	0.027558	0.0246359	0.00939579	0.326323	0.215053	0.184953	0.09727	0.047935	0.0262045	0.0187479	0.017987	0.0208479	0.0446785	0.226412	0.301457	0.173588	0.0686703	0.042623	0.0253188	0.028051	0.0442623	0.0284153	0.0612022	A3KMH1	von Willebrand factor A domain-containing protein 8 OS=Homo sapiens OX=9606 GN=VWA8 PE=1 SV=2	unknown	MITOCHONDRIA	0.818567	unknown
O60264	0.271815	0.0737735	0.0475481	0.087203	0.054463	0.0534513	0.0858912	0.125757	0.107903	0.0921946	0.237482	0.0456467	0.0654067	0.0620792	0.0670314	0.0489645	0.0518126	0.0841	0.108998	0.228478	0.306419	0.119303	0.0675473	0.0521928	0.0524456	0.0446488	0.0579738	0.0758087	0.08215	0.141511	O60264	SWI/SNF-related matrix-associated actin-dependent regulator of chromatin subfamily A member 5 OS=Homo sapiens OX=9606 GN=SMARCA5 PE=1 SV=1	NUCLEUS-CHROMATIN	NUCLEUS-CHROMATIN	1	NUCLEUS-CHROMATIN
G3V5N8	0.0665426	0.141385	0.152118	0.198912	0.0905839	0.0752719	0.0966657	0.0679021	0.0626789	0.0479393	0.0926444	0.089945	0.171889	0.152319	0.119638	0.0655548	0.0817507	0.0723031	0.070375	0.0835824	0.0766976	0.134723	0.204011	0.120991	0.0851126	0.0679478	0.057272	0.0735996	0.0739345	0.10571	G3V5N8	Zinc finger FYVE domain-containing protein 1 OS=Homo sapiens OX=9606 GN=ZFYVE1 PE=1 SV=1	unknown	GOLGI	0.477697	GOLGI
Q5VT06	0.0402502	0.0622561	0.0631495	0.0857197	0.0651714	0.059952	0.101989	0.240325	0.227959	0.053228	0.0776821	0.0543775	0.0676045	0.0841906	0.0833508	0.0778921	0.0766324	0.208692	0.212681	0.0568969	0.0432286	0.0629382	0.0866781	0.069232	0.0807983	0.0749186	0.114338	0.196572	0.233313	0.0379838	Q5VT06	Centrosome-associated protein 350 OS=Homo sapiens OX=9606 GN=CEP350 PE=1 SV=1	unknown	NUCLEUS	0.948966	NUCLEUS
O43684	0.0563146	0.0450377	0.0551043	0.0920073	0.0633903	0.0800205	0.165045	0.231752	0.183921	0.0274067	0.0680045	0.0409825	0.0777346	0.078898	0.0976706	0.072896	0.116443	0.195421	0.202295	0.049655	0.084439	0.0627636	0.0912656	0.0782423	0.0889257	0.0913555	0.128343	0.190836	0.132225	0.0516044	O43684	Mitotic checkpoint protein BUB3 OS=Homo sapiens OX=9606 GN=BUB3 PE=1 SV=1	unknown	NUCLEUS	0.594762	unknown
Q9H0H5	0.212483	0.235616	0.0624554	0.0520197	0.0328545	0.0382113	0.0684866	0.144909	0.135386	0.017578	0.287606	0.175373	0.0984915	0.0505124	0.0457913	0.0417226	0.0507811	0.0899704	0.100142	0.0596093	0.270536	0.309563	0.0716908	0.031081	0.0355792	0.0336033	0.052563	0.0839943	0.0911129	0.0202769	Q9H0H5	Rac GTPase-activating protein 1 OS=Homo sapiens OX=9606 GN=RACGAP1 PE=1 SV=1	unknown	NUCLEUS-CHROMATIN	0.626415	NUCLEUS-CHROMATIN
Q92734	0.0304869	0.0467329	0.0652874	0.105843	0.0964029	0.095731	0.119596	0.0625996	0.0686688	0.308652	0.0323371	0.0430698	0.0820582	0.0680661	0.0934177	0.0880618	0.0592418	0.037094	0.0553416	0.441312	0.0492976	0.0629087	0.11969	0.0710841	0.0707865	0.0681693	0.0587334	0.0611843	0.0713992	0.366747	Q92734	Protein TFG OS=Homo sapiens OX=9606 GN=TFG PE=1 SV=2	unknown	CYTOSOL	0.929881	CYTOSOL
Q15035	0.0530266	0.118341	0.217752	0.290041	0.144069	0.0856839	0.0704291	0.0104503	0.00405172	0.00615507	0.0723536	0.108691	0.223697	0.262676	0.166838	0.0936151	0.04568	0.00853682	0.00505766	0.0128536	0.0705353	0.18519	0.188282	0.205424	0.15737	0.0890825	0.0606997	0.0297878	0.00505831	0.00857103	Q15035	Translocating chain-associated membrane protein 2 OS=Homo sapiens OX=9606 GN=TRAM2 PE=1 SV=1	unknown	ER	0.919401	ER
Q9H1K0	0.0441657	0.0561183	0.0717157	0.138983	0.0876883	0.0801844	0.136946	0.209144	0.148845	0.02621	0.061657	0.0525048	0.115607	0.105491	0.121387	0.0712909	0.0915222	0.153661	0.140655	0.0862235	0.0463127	0.0706794	0.16153	0.142972	0.136034	0.0994029	0.0843957	0.107955	0.109246	0.0414717	Q9H1K0	Rabenosyn-5 OS=Homo sapiens OX=9606 GN=RBSN PE=1 SV=2	unknown	NUCLEUS	0.361043	unknown
Q8IZ83	0.0195075	0.0364454	0.047773	0.0841756	0.0587366	0.0821627	0.0876231	0.109615	0.214925	0.259036	0.0271437	0.028654	0.0522591	0.0453257	0.0617529	0.0660251	0.0501158	0.0739654	0.152649	0.442109	0.0288992	0.046192	0.0789231	0.0491765	0.0520996	0.0411442	0.0464868	0.0931209	0.232864	0.331094	Q8IZ83	Aldehyde dehydrogenase family 16 member A1 OS=Homo sapiens OX=9606 GN=ALDH16A1 PE=1 SV=2	unknown	PROTEASOME	0.438809	unknown
P20810-6	0.0717434	0.0581887	0.0571325	0.113379	0.0714277	0.0809943	0.150716	0.139122	0.129695	0.127601	0.0944062	0.0434487	0.0697667	0.0734497	0.0837173	0.0865169	0.105102	0.123911	0.113365	0.206317	0.0678735	0.0635192	0.0950219	0.0722816	0.0771105	0.0740038	0.100311	0.15474	0.124719	0.17042	P20810-6	Isoform 6 of Calpastatin OS=Homo sapiens OX=9606 GN=CAST	unknown	NUCLEUS	0.846256	unknown
Q5W111	0.0537225	0.12426	0.127971	0.165513	0.108348	0.122656	0.210009	0.070471	0.00852472	0.00852472	0.0841277	0.078181	0.165282	0.186533	0.14202	0.10739	0.136248	0.0481854	0.0146917	0.0373415	0.0742686	0.139535	0.238935	0.140004	0.114685	0.0724869	0.0937734	0.0829895	0.0185671	0.0247562	Q5W111	SPRY domain-containing protein 7 OS=Homo sapiens OX=9606 GN=SPRYD7 PE=1 SV=2	unknown	PM	0.358368	unknown
P07996	0.0556524	0.135081	0.19413	0.273955	0.123994	0.0836837	0.0887465	0.0214817	0.0110228	0.0122533	0.078862	0.103606	0.260547	0.253992	0.146641	0.068241	0.0367244	0.0115445	0.0104799	0.0293616	0.0706093	0.144023	0.250287	0.19557	0.132122	0.0777385	0.0660895	0.0287445	0.01121	0.0236069	P07996	Thrombospondin-1 OS=Homo sapiens OX=9606 GN=THBS1 PE=1 SV=2	unknown	ER	0.925501	ER
C9J5X1	0.0997667	0.11349	0.133594	0.189653	0.139495	0.110951	0.136407	0.048511	0.0107726	0.0173597	0.160698	0.0982758	0.175929	0.196637	0.14183	0.0929277	0.0747016	0.0204937	0.015274	0.0232319	0.199092	0.186312	0.210358	0.131327	0.0990415	0.0657474	0.0522953	0.03094	0.0134522	0.0114343	C9J5X1	Tyrosine-protein kinase receptor OS=Homo sapiens OX=9606 GN=IGF1R PE=1 SV=1	unknown	PM	0.861833	PM
Q13043	0.0411426	0.0641217	0.0740588	0.111896	0.0931095	0.107112	0.10461	0.0678494	0.0620307	0.274069	0.0431755	0.0439229	0.0827815	0.0690696	0.0940905	0.0810282	0.0597513	0.0430218	0.0529827	0.430176	0.0442725	0.0617601	0.117576	0.0721887	0.0738284	0.0647772	0.0610632	0.0712295	0.0645722	0.368732	Q13043	Serine/threonine-protein kinase 4 OS=Homo sapiens OX=9606 GN=STK4 PE=1 SV=2	unknown	CYTOSOL	0.924799	CYTOSOL
P04062	0.0545884	0.198796	0.235424	0.310123	0.0826195	0.0458076	0.0415707	0.0121274	0.00862731	0.0103159	0.0676959	0.165968	0.306843	0.230783	0.112742	0.0352304	0.0241014	0.0103226	0.00926267	0.0370507	0.0754941	0.194961	0.353142	0.202127	0.0807121	0.0384744	0.02617	0.0121175	0.00648579	0.0103159	P04062	Glucosylceramidase OS=Homo sapiens OX=9606 GN=GBA PE=1 SV=3	unknown	LYSOSOME	0.478788	unknown
E9PDF6	0.178882	0.16307	0.150203	0.213871	0.106319	0.0601189	0.0676647	0.0268815	0.0162228	0.0167674	0.277528	0.112774	0.175196	0.171895	0.109076	0.052068	0.0329779	0.0135117	0.0147676	0.0402065	0.216535	0.239504	0.226584	0.119142	0.0604544	0.0322999	0.0294576	0.0222874	0.0171497	0.0365858	E9PDF6	Unconventional myosin-Ib OS=Homo sapiens OX=9606 GN=MYO1B PE=1 SV=1	unknown	PM	0.213538	unknown
Q08AD1-2	0.0538296	0.05707	0.0530196	0.0947385	0.0626595	0.0649277	0.136215	0.218802	0.203896	0.0548422	0.077211	0.0411012	0.0701919	0.0937451	0.0852441	0.0644205	0.110201	0.200359	0.188582	0.068944	0.048245	0.0563452	0.0822958	0.0705768	0.0839458	0.080252	0.113815	0.199786	0.19823	0.0665079	Q08AD1-2	Isoform 2 of Calmodulin-regulated spectrin-associated protein 2 OS=Homo sapiens OX=9606 GN=CAMSAP2	unknown	NUCLEUS	0.940093	NUCLEUS
Q9H0U3	0.0559571	0.117275	0.18552	0.282797	0.145705	0.0869775	0.0677027	0.018552	0.00789062	0.0316227	0.0696712	0.0932177	0.235817	0.275384	0.172308	0.0790458	0.0464328	0.0103869	0.00541349	0.0123234	0.0871263	0.144478	0.268395	0.198841	0.133313	0.0750458	0.0509457	0.0187309	0.00982306	0.0133008	Q9H0U3	Magnesium transporter protein 1 OS=Homo sapiens OX=9606 GN=MAGT1 PE=1 SV=1	unknown	ER	0.951862	ER
A0A087X295	0.0243292	0.0360391	0.0503638	0.106867	0.072874	0.0871987	0.144952	0.141087	0.153365	0.182924	0.0388895	0.0391596	0.0816679	0.0709193	0.0849627	0.077671	0.065464	0.0922005	0.121692	0.327374	0.0472408	0.0534459	0.0963018	0.0698271	0.0737983	0.0658559	0.0820716	0.112435	0.127989	0.271035	A0A087X295	WD repeat-containing protein 6 OS=Homo sapiens OX=9606 GN=WDR6 PE=1 SV=1	unknown	CYTOSOL	0.48963	unknown
Q71UM5	0.0245511	0.037984	0.0569585	0.104763	0.0815797	0.0899621	0.169473	0.190376	0.215629	0.0287247	0.0337316	0.0378843	0.0917966	0.0799213	0.0863325	0.0830541	0.0781	0.10746	0.189203	0.212516	0.0287534	0.0371827	0.0942212	0.0573195	0.0829821	0.0940339	0.118385	0.163342	0.196965	0.126815	Q71UM5	40S ribosomal protein S27-like OS=Homo sapiens OX=9606 GN=RPS27L PE=1 SV=3	unknown	NUCLEUS	0.455184	unknown
Q6WKZ4	0.083143	0.084144	0.0919015	0.159842	0.117645	0.105415	0.19056	0.0922456	0.047202	0.027902	0.15235	0.0764216	0.114306	0.136561	0.145724	0.109002	0.126535	0.0566334	0.0409156	0.0415499	0.0844993	0.0927835	0.135599	0.12145	0.138334	0.121897	0.125263	0.0759257	0.0381601	0.0660898	Q6WKZ4	Rab11 family-interacting protein 1 OS=Homo sapiens OX=9606 GN=RAB11FIP1 PE=1 SV=3	unknown	NUCLEUS	0.259363	unknown
Q3LXA3	0.0330887	0.05402	0.0591524	0.112685	0.0810299	0.0974596	0.104341	0.0417766	0.0378484	0.378598	0.0276011	0.0316384	0.0638152	0.0484731	0.0677547	0.0599246	0.0462465	0.0220955	0.029216	0.603235	0.0365205	0.0536405	0.096804	0.0620352	0.0630267	0.0481872	0.057243	0.0528473	0.0529464	0.476749	Q3LXA3	Triokinase/FMN cyclase OS=Homo sapiens OX=9606 GN=TKFC PE=1 SV=2	unknown	CYTOSOL	0.841451	unknown
Q9H410	0.102272	0.0625972	0.0559589	0.116171	0.0689244	0.0678871	0.121979	0.16658	0.145835	0.0917955	0.0898794	0.0411034	0.068323	0.0734381	0.0876872	0.0710632	0.0701498	0.126233	0.13555	0.236573	0.100551	0.074232	0.0983736	0.0739539	0.078495	0.0729809	0.0837774	0.128122	0.113618	0.175895	Q9H410	Kinetochore-associated protein DSN1 homolog OS=Homo sapiens OX=9606 GN=DSN1 PE=1 SV=2	unknown	NUCLEUS	0.869203	unknown
P13667	0.0504366	0.126483	0.209459	0.315734	0.127982	0.0728839	0.0603669	0.00988878	0.00570178	0.0210646	0.0592547	0.0973797	0.245849	0.260408	0.174437	0.0685104	0.0396759	0.00670506	0.00592713	0.0418524	0.0661114	0.141177	0.281193	0.204052	0.131529	0.0713842	0.0472721	0.0150673	0.00932133	0.0328923	P13667	Protein disulfide-isomerase A4 OS=Homo sapiens OX=9606 GN=PDIA4 PE=1 SV=2	ER	ER	1	ER
P18669	0.0252865	0.0407416	0.0610147	0.114119	0.0725145	0.109732	0.106412	0.0334657	0.0326681	0.404046	0.0436552	0.0530958	0.110715	0.0871429	0.124028	0.145018	0.109108	0.0469959	0.0448772	0.235364	0.0492131	0.0731365	0.149802	0.0814473	0.0880972	0.076007	0.0816228	0.0820929	0.0693947	0.249187	P18669	Phosphoglycerate mutase 1 OS=Homo sapiens OX=9606 GN=PGAM1 PE=1 SV=2	unknown	CYTOSOL	0.866332	CYTOSOL
Q13753	0.0502082	0.132378	0.194342	0.269777	0.154788	0.0661278	0.0638011	0.0284105	0.0213079	0.0188587	0.0698472	0.10424	0.248101	0.258884	0.152684	0.0696022	0.0392942	0.0200147	0.0182992	0.0190344	0.0885147	0.115285	0.220207	0.184801	0.127375	0.0734024	0.0414508	0.0401554	0.0613126	0.0474957	Q13753	Laminin subunit gamma-2 OS=Homo sapiens OX=9606 GN=LAMC2 PE=1 SV=2	unknown	ER	0.905261	ER
Q9Y4H2	0.0351812	0.0398454	0.0526386	0.0930171	0.0720949	0.0739606	0.136461	0.239072	0.205624	0.0521055	0.0511943	0.0423828	0.0705651	0.0760996	0.0829449	0.0801777	0.101515	0.183877	0.216866	0.0943781	0.0483784	0.0508108	0.0768919	0.0598649	0.067973	0.0697297	0.121351	0.204324	0.215	0.0856757	Q9Y4H2	Insulin receptor substrate 2 OS=Homo sapiens OX=9606 GN=IRS2 PE=1 SV=2	unknown	NUCLEUS	0.948071	NUCLEUS
Q7Z333	0.108677	0.0634948	0.049632	0.0742769	0.0729078	0.0676023	0.111587	0.217868	0.196817	0.0371385	0.168064	0.0533537	0.070122	0.0644055	0.0602134	0.0575457	0.0682165	0.152058	0.172637	0.133384	0.099734	0.0664894	0.0864362	0.0545213	0.0944149	0.0817819	0.108378	0.156915	0.184176	0.0671543	Q7Z333	Probable helicase senataxin OS=Homo sapiens OX=9606 GN=SETX PE=1 SV=4	unknown	NUCLEUS	0.943313	NUCLEUS
P41208	0.0623194	0.0495507	0.0601124	0.089433	0.079029	0.07162	0.117755	0.181336	0.119174	0.169671	0.0703247	0.052183	0.0778552	0.079464	0.0948159	0.0950555	0.109381	0.125486	0.111691	0.183744	0.0705586	0.0666187	0.112261	0.0789062	0.0797337	0.0816407	0.103229	0.123648	0.0991634	0.18424	P41208	Centrin-2 OS=Homo sapiens OX=9606 GN=CETN2 PE=1 SV=1	unknown	NUCLEUS	0.702412	unknown
F5H5D3	0.0295015	0.0486162	0.0695842	0.0975617	0.0770058	0.1134	0.109051	0.0439009	0.0588102	0.352569	0.0263853	0.0307001	0.058712	0.0473232	0.0704175	0.0671359	0.0553166	0.0243501	0.0383561	0.581303	0.0374728	0.0606495	0.100473	0.0621087	0.0630473	0.0509162	0.0578684	0.0625625	0.0616931	0.443208	F5H5D3	Tubulin alpha chain OS=Homo sapiens OX=9606 GN=TUBA1C PE=1 SV=1	unknown	CYTOSOL	0.878447	CYTOSOL
Q8NBM4	0.0699067	0.107088	0.174488	0.265423	0.162373	0.0955299	0.0838323	0.0226988	0.0128116	0.00584877	0.0641172	0.0803146	0.214655	0.246015	0.178431	0.0977023	0.0535086	0.0168702	0.0139723	0.0344132	0.072436	0.111266	0.234111	0.194149	0.162285	0.10552	0.0713042	0.0314296	0.0106216	0.00687794	Q8NBM4	Ubiquitin-associated domain-containing protein 2 OS=Homo sapiens OX=9606 GN=UBAC2 PE=1 SV=1	ER	ER	1	ER
O15347	0.201662	0.140959	0.0986535	0.11494	0.0562369	0.0570368	0.108852	0.0957872	0.0846998	0.0411723	0.357121	0.0622891	0.0778543	0.0703694	0.0603329	0.0474894	0.0553996	0.0748207	0.0798673	0.114457	0.256166	0.111913	0.0955602	0.0640539	0.0603548	0.0529369	0.0656505	0.0825788	0.083392	0.127394	O15347	High mobility group protein B3 OS=Homo sapiens OX=9606 GN=HMGB3 PE=1 SV=4	NUCLEUS-CHROMATIN	NUCLEUS-CHROMATIN	1	NUCLEUS-CHROMATIN
P51668	0.050621	0.0614015	0.0747598	0.126553	0.0815561	0.0841341	0.109913	0.0719475	0.0382001	0.300914	0.0473563	0.044749	0.0876182	0.0784016	0.080342	0.0694276	0.053723	0.0432331	0.0398981	0.455251	0.0584772	0.0718782	0.11066	0.0822335	0.0791878	0.0613198	0.0753299	0.0694416	0.0633503	0.328122	P51668	Ubiquitin-conjugating enzyme E2 D1 OS=Homo sapiens OX=9606 GN=UBE2D1 PE=1 SV=1	unknown	CYTOSOL	0.902414	CYTOSOL
P63146	0.040311	0.0449179	0.067089	0.108264	0.0788943	0.067089	0.098186	0.0883962	0.071408	0.335445	0.0261169	0.0315626	0.0650144	0.0591242	0.0712381	0.0922427	0.0719049	0.0591242	0.0832407	0.440431	0.0346086	0.0504656	0.0891014	0.0563806	0.0644349	0.0553738	0.0553738	0.0722376	0.101309	0.420715	P63146	Ubiquitin-conjugating enzyme E2 B OS=Homo sapiens OX=9606 GN=UBE2B PE=1 SV=1	unknown	CYTOSOL	0.867891	CYTOSOL
Q9NRZ9	0.0979652	0.0542899	0.0510174	0.0902874	0.0591987	0.0568911	0.139039	0.231802	0.194462	0.0250472	0.110365	0.0417483	0.0704823	0.0739108	0.077969	0.0646982	0.0758233	0.193488	0.231668	0.059847	0.137667	0.0746928	0.0758318	0.0664262	0.0747618	0.072432	0.101011	0.16459	0.178638	0.0539486	Q9NRZ9	Lymphoid-specific helicase OS=Homo sapiens OX=9606 GN=HELLS PE=1 SV=1	unknown	NUCLEUS	0.9766	NUCLEUS
Q9BZD4	0.0409623	0.0442945	0.0514264	0.100922	0.0610574	0.0697944	0.153182	0.216048	0.22066	0.0416531	0.059297	0.0368329	0.0733389	0.0738527	0.0872252	0.0691668	0.0815119	0.192151	0.224018	0.102606	0.0664842	0.0617804	0.0797382	0.0653114	0.0725122	0.0705827	0.10129	0.180385	0.207246	0.0946694	Q9BZD4	Kinetochore protein Nuf2 OS=Homo sapiens OX=9606 GN=NUF2 PE=1 SV=2	NUCLEUS	NUCLEUS	1	NUCLEUS
G3V5R9	0.0401281	0.0536815	0.0613502	0.10938	0.0629017	0.0862738	0.130613	0.144787	0.156124	0.154761	0.0826805	0.0435585	0.0715211	0.0649261	0.0835518	0.0654138	0.0743829	0.13556	0.141387	0.237018	0.0452036	0.0602552	0.104556	0.062594	0.0634771	0.0587122	0.0615847	0.0902033	0.110127	0.343287	G3V5R9	Kinesin light chain 1 OS=Homo sapiens OX=9606 GN=KLC1 PE=1 SV=1	unknown	NUCLEUS	0.476729	unknown
P13798	0.0273768	0.0490102	0.0683208	0.106725	0.074881	0.0992712	0.108371	0.0473127	0.0472106	0.37152	0.0487138	0.0601928	0.116501	0.0886665	0.134007	0.122352	0.0950775	0.049753	0.0614238	0.223313	0.052954	0.0817804	0.148842	0.0868656	0.0877989	0.0739704	0.0862326	0.0880242	0.0910388	0.202493	P13798	Acylamino-acid-releasing enzyme OS=Homo sapiens OX=9606 GN=APEH PE=1 SV=4	CYTOSOL	CYTOSOL	1	CYTOSOL
P04066	0.0830329	0.255383	0.225301	0.269805	0.0660348	0.027815	0.022355	0.0184403	0.0100958	0.0217369	0.0683991	0.213278	0.341309	0.215866	0.0808641	0.0256695	0.0144721	0.00934876	0.00903185	0.0217609	0.0800554	0.23608	0.377216	0.157548	0.0515235	0.0204986	0.0198753	0.0169668	0.017867	0.0223684	P04066	Tissue alpha-L-fucosidase OS=Homo sapiens OX=9606 GN=FUCA1 PE=1 SV=4	LYSOSOME	LYSOSOME	1	LYSOSOME
Q16778	0.574521	0.143121	0.0420891	0.0592308	0.0317119	0.0195565	0.0299337	0.0508137	0.038652	0.010371	0.627576	0.0679842	0.0418161	0.055229	0.0389904	0.022158	0.0268897	0.0436519	0.0475088	0.0281956	0.662608	0.178874	0.0316426	0.0239527	0.0218469	0.0142457	0.0155111	0.0162538	0.0140532	0.0210125	Q16778	Histone H2B type 2-E OS=Homo sapiens OX=9606 GN=HIST2H2BE PE=1 SV=3	NUCLEUS-CHROMATIN	NUCLEUS-CHROMATIN	1	NUCLEUS-CHROMATIN
Q9H2H9	0.0866804	0.117422	0.125082	0.182533	0.116263	0.116111	0.178098	0.0652119	0.00881923	0.00377967	0.16901	0.0997846	0.18823	0.172922	0.139868	0.0842499	0.0937181	0.0308425	0.00952489	0.0118494	0.147546	0.170557	0.208927	0.11888	0.0944829	0.0775714	0.0845578	0.0671472	0.018076	0.012254	Q9H2H9	Sodium-coupled neutral amino acid transporter 1 OS=Homo sapiens OX=9606 GN=SLC38A1 PE=1 SV=1	unknown	PM	0.719544	PM
P61204	0.0567045	0.0869329	0.105524	0.154297	0.102856	0.101908	0.143439	0.0465695	0.0590638	0.142705	0.0724139	0.0710288	0.108912	0.105746	0.147376	0.117142	0.102511	0.0423047	0.0499895	0.182577	0.0657553	0.11925	0.175558	0.11013	0.0956736	0.0789627	0.0630004	0.0721287	0.0636912	0.15585	P61204	ADP-ribosylation factor 3 OS=Homo sapiens OX=9606 GN=ARF3 PE=1 SV=2	unknown	CYTOSOL	0.415514	unknown
E7ENY0	0.0937397	0.0718767	0.0695655	0.107837	0.0692927	0.0654312	0.138011	0.167296	0.148447	0.0685032	0.141975	0.0601456	0.0905033	0.0805002	0.0823362	0.0628047	0.0783476	0.124185	0.142735	0.136467	0.0865776	0.0842427	0.101641	0.0720641	0.0723846	0.0670889	0.0954292	0.130088	0.118642	0.171843	E7ENY0	Alpha-adducin OS=Homo sapiens OX=9606 GN=ADD1 PE=1 SV=1	unknown	NUCLEUS	0.9005	NUCLEUS
Q9BZE4	0.100295	0.0429914	0.047916	0.0820929	0.0518428	0.060454	0.114108	0.242232	0.234055	0.0240135	0.0974375	0.0351294	0.0671296	0.0724034	0.081142	0.0604043	0.0857009	0.20516	0.242106	0.0533871	0.101824	0.0679651	0.0570684	0.0531966	0.0595888	0.0523815	0.0814895	0.248512	0.25381	0.0241637	Q9BZE4	Nucleolar GTP-binding protein 1 OS=Homo sapiens OX=9606 GN=GTPBP4 PE=1 SV=3	NUCLEUS	NUCLEUS	1	NUCLEUS
H7BXI1	0.0631824	0.100008	0.162805	0.260224	0.146924	0.0955455	0.0978532	0.0377181	0.0235427	0.0121975	0.0951138	0.0801333	0.198855	0.235693	0.174849	0.0829953	0.060425	0.0280739	0.0210921	0.0227694	0.0867296	0.116216	0.201815	0.162672	0.13174	0.0937105	0.0836381	0.0605678	0.0402899	0.0226215	H7BXI1	Extended synaptotagmin-2 (Fragment) OS=Homo sapiens OX=9606 GN=ESYT2 PE=1 SV=1	unknown	ER	0.890615	unknown
Q96DI7	0.0743885	0.0354782	0.0421619	0.0754363	0.0575527	0.0694028	0.155967	0.264605	0.199827	0.0251815	0.0822188	0.0304646	0.0562771	0.0499774	0.0730762	0.0685856	0.105447	0.236965	0.234768	0.0622214	0.105875	0.0458857	0.0565804	0.0524565	0.0507794	0.0525115	0.093201	0.239436	0.253375	0.0498997	Q96DI7	U5 small nuclear ribonucleoprotein 40 kDa protein OS=Homo sapiens OX=9606 GN=SNRNP40 PE=1 SV=1	unknown	NUCLEUS	0.970693	NUCLEUS
P14174	0.0496124	0.055814	0.05323	0.118346	0.0976744	0.0852713	0.10801	0.0465116	0.0180879	0.367442	0.0720331	0.0613128	0.104946	0.081625	0.115291	0.125823	0.0946022	0.0511567	0.0616889	0.231522	0.0502542	0.0774345	0.120454	0.0666797	0.0795855	0.063551	0.0850606	0.0811498	0.0506453	0.325186	P14174	Macrophage migration inhibitory factor OS=Homo sapiens OX=9606 GN=MIF PE=1 SV=4	unknown	CYTOSOL	0.898534	CYTOSOL
Q99459	0.0784871	0.0316825	0.0323655	0.0619749	0.0421205	0.0538639	0.121841	0.296584	0.264043	0.017038	0.0830931	0.0285101	0.0525768	0.0565446	0.064339	0.0582982	0.086407	0.253492	0.259726	0.0570127	0.0806999	0.0511377	0.0660391	0.0621385	0.0766136	0.0772215	0.122006	0.229322	0.214665	0.020157	Q99459	Cell division cycle 5-like protein OS=Homo sapiens OX=9606 GN=CDC5L PE=1 SV=2	unknown	NUCLEUS	0.954873	NUCLEUS
cRAP087	0.0509395	0.0674073	0.441702	0.0778381	0.0443666	0.0523326	0.0589055	0.0539759	0.0534757	0.0990569	0.0912598	0.0857694	0.139932	0.143641	0.112628	0.0851758	0.080279	0.0765692	0.0692981	0.115447	0.0692383	0.172069	0.155812	0.100908	0.0862966	0.0605999	0.0672717	0.0660772	0.0482031	0.173525	cRAP087	Serum albumin OS=Bos taurus GN=ALB PE=1 SV=4	unknown	NUCLEUS-CHROMATIN	0.277971	unknown
P43487	0.0387086	0.0485899	0.0596962	0.127858	0.0707208	0.0952744	0.130635	0.0686792	0.071483	0.288355	0.0519999	0.0489528	0.0976482	0.0733148	0.112025	0.100924	0.0890364	0.0738441	0.0807822	0.271472	0.0576059	0.082104	0.130863	0.0800083	0.0819181	0.0634285	0.0814742	0.0907036	0.0743303	0.257565	P43487	Ran-specific GTPase-activating protein OS=Homo sapiens OX=9606 GN=RANBP1 PE=1 SV=1	unknown	CYTOSOL	0.928114	CYTOSOL
Q7Z4H8	0.0539894	0.128663	0.195308	0.294402	0.135715	0.0728587	0.053745	0.0229538	0.0174728	0.0248913	0.0646482	0.0963582	0.232292	0.24026	0.171766	0.0702621	0.040555	0.0141957	0.0161986	0.0534641	0.0652954	0.134253	0.256379	0.188391	0.133186	0.0781265	0.050912	0.0240128	0.0150141	0.054429	Q7Z4H8	KDEL motif-containing protein 2 OS=Homo sapiens OX=9606 GN=KDELC2 PE=1 SV=2	ER	ER	1	ER
O60784	0.0641235	0.104028	0.139541	0.154976	0.115071	0.0939892	0.100514	0.0517003	0.0321245	0.143933	0.0773233	0.0831045	0.143951	0.111721	0.110999	0.0855615	0.0565111	0.0330973	0.0250036	0.272727	0.0816993	0.136622	0.179528	0.112903	0.0837023	0.064727	0.0539743	0.0593506	0.0394265	0.188067	O60784	Target of Myb protein 1 OS=Homo sapiens OX=9606 GN=TOM1 PE=1 SV=2	unknown	CYTOSOL	0.298835	unknown
Q7Z2T5	0.030349	0.0350972	0.0461354	0.0857849	0.0568799	0.0663762	0.139679	0.220226	0.264795	0.0546772	0.0438435	0.0352383	0.0657142	0.0632614	0.0820661	0.0648353	0.0752596	0.154096	0.23604	0.179646	0.0459008	0.0440624	0.0679222	0.0526089	0.0615466	0.0670813	0.0924666	0.188238	0.268442	0.11173	Q7Z2T5	TRMT1-like protein OS=Homo sapiens OX=9606 GN=TRMT1L PE=1 SV=2	unknown	NUCLEUS	0.945067	NUCLEUS
Q05086	0.0279434	0.0382219	0.0415591	0.086144	0.065053	0.0794251	0.0810715	0.130417	0.201611	0.248554	0.031817	0.0332048	0.0612793	0.0510528	0.0736785	0.0586743	0.0480838	0.0681841	0.163089	0.410936	0.0379654	0.0457059	0.0729293	0.056948	0.052051	0.0442051	0.0464431	0.103865	0.279711	0.260176	Q05086	Ubiquitin-protein ligase E3A OS=Homo sapiens OX=9606 GN=UBE3A PE=1 SV=4	unknown	PROTEASOME	0.609437	PROTEASOME
Q9BV40	0.0739632	0.0993452	0.100935	0.189305	0.124166	0.147334	0.186966	0.0613346	0.00829436	0.00835672	0.109983	0.0657224	0.179619	0.178935	0.152752	0.129799	0.125947	0.0295689	0.00866567	0.0190086	0.0890954	0.110392	0.209911	0.137926	0.124597	0.121841	0.10503	0.0654705	0.0225142	0.0132223	Q9BV40	Vesicle-associated membrane protein 8 OS=Homo sapiens OX=9606 GN=VAMP8 PE=1 SV=1	unknown	PM	0.203502	unknown
P09486	0.0655259	0.139043	0.163704	0.290733	0.140834	0.0829682	0.0694663	0.0163401	0.00666832	0.0247169	0.0686002	0.103892	0.204739	0.256394	0.179162	0.0714043	0.058185	0.0110561	0.011617	0.034951	0.0583722	0.152579	0.251188	0.197829	0.128864	0.0753738	0.0572388	0.0250229	0.012773	0.0407603	P09486	SPARC OS=Homo sapiens OX=9606 GN=SPARC PE=1 SV=1	unknown	ER	0.945825	ER
Q9BRZ2	0.0244475	0.0428002	0.0480779	0.0819231	0.0529129	0.0616977	0.139739	0.278525	0.255133	0.0147434	0.0483098	0.0381226	0.0722091	0.0714689	0.0764391	0.0627798	0.0896577	0.225017	0.257464	0.0585322	0.0437872	0.0462996	0.0865934	0.0841528	0.0916421	0.0903022	0.128825	0.198119	0.150528	0.0797502	Q9BRZ2	E3 ubiquitin-protein ligase TRIM56 OS=Homo sapiens OX=9606 GN=TRIM56 PE=1 SV=3	unknown	NUCLEUS	0.912322	NUCLEUS
Q16891-2	0.342091	0.440429	0.13818	0.0304502	0.00892821	0.00769839	0.00850097	0.00812963	0.00763051	0.00796192	0.458988	0.29635	0.173745	0.0331057	0.00728817	0.00545257	0.00469015	0.00370009	0.00469015	0.0119892	0.360545	0.390111	0.171041	0.0255464	0.0100322	0.00755971	0.00659659	0.00683973	0.00709236	0.0146363	Q16891-2	Isoform 2 of MICOS complex subunit MIC60 OS=Homo sapiens OX=9606 GN=IMMT	unknown	MITOCHONDRIA	0.95003	unknown
Q14244	0.026063	0.0338628	0.0426139	0.083801	0.0509845	0.0593551	0.110149	0.286312	0.284695	0.022163	0.0516058	0.0384282	0.0570504	0.0632841	0.0665983	0.0589442	0.0954786	0.272627	0.256214	0.0397696	0.0383041	0.0416083	0.0862694	0.0714183	0.0949431	0.0931832	0.139281	0.222192	0.181895	0.0309054	Q14244	Ensconsin OS=Homo sapiens OX=9606 GN=MAP7 PE=1 SV=1	unknown	NUCLEUS	0.898191	NUCLEUS
O15118	0.0548317	0.213893	0.239776	0.27524	0.0937427	0.0475286	0.0467983	0.014168	0.00969853	0.00432344	0.0668612	0.16705	0.323334	0.245973	0.100168	0.045081	0.0272458	0.0100682	0.00562998	0.00858881	0.0749251	0.203284	0.355911	0.183891	0.0834518	0.0384355	0.0284003	0.0145827	0.00885459	0.00826428	O15118	NPC intracellular cholesterol transporter 1 OS=Homo sapiens OX=9606 GN=NPC1 PE=1 SV=2	unknown	LYSOSOME	0.485268	unknown
Q9BR61	0.0389509	0.0544138	0.0673322	0.0963006	0.0857311	0.109023	0.0968878	0.0428655	0.0504991	0.357996	0.0335692	0.0482871	0.0862404	0.0682658	0.106595	0.0894345	0.0691426	0.0314398	0.0435899	0.423436	0.0401194	0.0568474	0.126605	0.0769765	0.0785729	0.0696883	0.0680919	0.0653155	0.0703825	0.347401	Q9BR61	Acyl-CoA-binding domain-containing protein 6 OS=Homo sapiens OX=9606 GN=ACBD6 PE=1 SV=1	unknown	CYTOSOL	0.941347	CYTOSOL
Q9Y3M8	0.0332761	0.0400569	0.0465866	0.0885689	0.0620736	0.0692729	0.132937	0.257001	0.220627	0.0496003	0.0320866	0.0279096	0.0674008	0.0831593	0.0850579	0.0732865	0.0827796	0.197646	0.257642	0.0930321	0.0339772	0.0523021	0.0862793	0.061159	0.0720776	0.0768878	0.078644	0.159579	0.183248	0.195846	Q9Y3M8	StAR-related lipid transfer protein 13 OS=Homo sapiens OX=9606 GN=STARD13 PE=1 SV=2	unknown	NUCLEUS	0.950547	NUCLEUS
Q9Y2H0-1	0.0404982	0.0644745	0.0746071	0.134306	0.0841912	0.090516	0.125044	0.0444674	0.0399497	0.301946	0.051595	0.0551205	0.0949185	0.0807485	0.112139	0.0802739	0.067426	0.0255941	0.0297637	0.40242	0.0430663	0.0962599	0.134263	0.0902938	0.0869849	0.0662288	0.0646746	0.0646245	0.0429159	0.310689	Q9Y2H0-1	Isoform 2 of Disks large-associated protein 4 OS=Homo sapiens OX=9606 GN=DLGAP4	unknown	CYTOSOL	0.917877	CYTOSOL
Q9H147	0.223561	0.0852518	0.0919065	0.107914	0.0643885	0.0483813	0.0942446	0.130755	0.107374	0.046223	0.316737	0.0598517	0.0677966	0.0741525	0.0704449	0.0677966	0.0725636	0.10964	0.108581	0.0524364	0.359225	0.113287	0.0765635	0.0449588	0.0534164	0.0545293	0.0609838	0.0807923	0.0901402	0.0661028	Q9H147	Deoxynucleotidyltransferase terminal-interacting protein 1 OS=Homo sapiens OX=9606 GN=DNTTIP1 PE=1 SV=2	unknown	NUCLEUS-CHROMATIN	0.910947	NUCLEUS-CHROMATIN
Q15464	0.0537415	0.0677551	0.0736054	0.0994558	0.0693878	0.0597279	0.134014	0.220544	0.197687	0.0240816	0.0947692	0.0606154	0.0873846	0.110769	0.0935385	0.0689231	0.102154	0.150154	0.145538	0.0861538	0.06386	0.0700095	0.113529	0.0936613	0.0927152	0.0520341	0.106906	0.156102	0.187796	0.0633869	Q15464	SH2 domain-containing adapter protein B OS=Homo sapiens OX=9606 GN=SHB PE=1 SV=2	unknown	NUCLEUS	0.905586	NUCLEUS
O14562	0.0521356	0.0512743	0.0631302	0.109439	0.0740234	0.0862846	0.116583	0.136647	0.138674	0.171809	0.0559671	0.0397326	0.0741695	0.0721148	0.088494	0.0779604	0.0831404	0.0978701	0.131121	0.27943	0.0571281	0.0579293	0.0910998	0.0613245	0.0601038	0.0565559	0.0649678	0.115916	0.189448	0.245527	O14562	Ubiquitin domain-containing protein UBFD1 OS=Homo sapiens OX=9606 GN=UBFD1 PE=1 SV=2	unknown	NUCLEUS	0.504591	unknown
Q15393	0.0615125	0.0378428	0.0441954	0.0853643	0.0523799	0.0779156	0.138226	0.201206	0.212546	0.0888118	0.0551902	0.0340947	0.063512	0.0610547	0.0832225	0.0694082	0.0870451	0.169207	0.196124	0.181142	0.0731461	0.0563409	0.0771558	0.0545058	0.0610766	0.0583474	0.0757542	0.158311	0.194953	0.190409	Q15393	Splicing factor 3B subunit 3 OS=Homo sapiens OX=9606 GN=SF3B3 PE=1 SV=4	unknown	NUCLEUS	0.957401	NUCLEUS
P41227	0.0243019	0.0358692	0.0543121	0.11864	0.0841416	0.106576	0.240971	0.180611	0.111885	0.0426921	0.0388899	0.0364116	0.0845677	0.0809571	0.0985939	0.0992236	0.131135	0.162099	0.132429	0.135693	0.0373193	0.0483779	0.0934681	0.0815038	0.0965429	0.101705	0.151641	0.16663	0.0802449	0.142566	P41227	N-alpha-acetyltransferase 10 OS=Homo sapiens OX=9606 GN=NAA10 PE=1 SV=1	unknown	RIBOSOME	0.401849	unknown
Q8NBI6	0.0531621	0.113098	0.199904	0.271621	0.131974	0.0911075	0.0860032	0.0239165	0.0130016	0.0162119	0.070824	0.0880862	0.229374	0.24782	0.178462	0.0832754	0.0488024	0.0167477	0.0133519	0.0232564	0.0731248	0.140335	0.212539	0.185813	0.137443	0.0835962	0.0629162	0.0410971	0.0316334	0.0315019	Q8NBI6	Xyloside xylosyltransferase 1 OS=Homo sapiens OX=9606 GN=XXYLT1 PE=1 SV=1	unknown	ER	0.948642	ER
L0R6Q1	0.271316	0.313762	0.0863874	0.052543	0.0430067	0.0409499	0.0695587	0.052543	0.0387061	0.0312266	0.463105	0.303583	0.154871	0.0283679	0.00741672	0.00540541	0.00624345	0.00854808	0.00548921	0.0169705	0.40674	0.296923	0.166612	0.0320083	0.0174354	0.0126862	0.0113851	0.0149632	0.013532	0.0277145	L0R6Q1	SLC35A4 upstream open reading frame protein OS=Homo sapiens OX=9606 GN=SLC35A4 PE=3 SV=1	unknown	MITOCHONDRIA	0.832034	unknown
A0A0J9YVP6	0.0588531	0.0378593	0.0459079	0.0721717	0.0632041	0.0812973	0.151875	0.231665	0.222173	0.0349945	0.0537166	0.0344148	0.0638398	0.0678645	0.0910164	0.0763758	0.10077	0.196766	0.224138	0.0910986	0.0843226	0.0498236	0.0732438	0.0597636	0.0684038	0.0706319	0.118599	0.211822	0.180071	0.0833199	A0A0J9YVP6	Poly(U)-binding-splicing factor PUF60 (Fragment) OS=Homo sapiens OX=9606 GN=PUF60 PE=1 SV=1	unknown	NUCLEUS	0.971365	NUCLEUS
Q8NHP6	0.0544747	0.0871595	0.150973	0.26511	0.139818	0.088716	0.103502	0.0440986	0.0337224	0.0324254	0.0864307	0.085336	0.221811	0.254705	0.172184	0.0738154	0.0414951	0.016525	0.0183496	0.0293489	0.0767154	0.0917885	0.238245	0.197975	0.151856	0.104387	0.0704162	0.0332958	0.0139483	0.0213723	Q8NHP6	Motile sperm domain-containing protein 2 OS=Homo sapiens OX=9606 GN=MOSPD2 PE=1 SV=1	ER	ER	1	ER
A0A0A0MRM9	0.162432	0.0598361	0.0545502	0.108049	0.0561344	0.0742924	0.116473	0.0918411	0.130168	0.146224	0.0933422	0.0385173	0.0637545	0.0675198	0.0833439	0.0756099	0.0796296	0.0759916	0.0878978	0.334393	0.131384	0.0720803	0.0843932	0.0571578	0.0627634	0.0493099	0.0569451	0.0966482	0.130591	0.258727	A0A0A0MRM9	Nucleolar and coiled-body phosphoprotein 1 (Fragment) OS=Homo sapiens OX=9606 GN=NOLC1 PE=1 SV=1	unknown	NUCLEUS	0.334281	unknown
U3KQ69	0.300938	0.412557	0.121241	0.0394515	0.0240558	0.0105846	0.0194852	0.0380082	0.0187635	0.0149146	0.467383	0.287603	0.143686	0.024829	0.00764412	0.00689695	0.00787402	0.0138514	0.0190241	0.0212081	0.326234	0.346381	0.139301	0.0241761	0.0169809	0.016837	0.0264786	0.0267664	0.0431717	0.0336739	U3KQ69	Mitochondrial GTPase 1 OS=Homo sapiens OX=9606 GN=MTG1 PE=3 SV=1	unknown	MITOCHONDRIA	0.960041	MITOCHONDRIA
A0A087WYR0	0.0286196	0.0515484	0.108159	0.147532	0.0556842	0.117291	0.148227	0.0669336	0.190875	0.085131	0.0477245	0.0486978	0.101524	0.0898107	0.0963552	0.0716875	0.046919	0.0651094	0.111827	0.320345	0.0478316	0.066635	0.145711	0.0969611	0.0937955	0.077018	0.0698322	0.0818613	0.135834	0.18452	A0A087WYR0	Signal recognition particle 19 kDa protein OS=Homo sapiens OX=9606 GN=SRP19 PE=1 SV=1	unknown	NUCLEUS	0.337382	unknown
F5H269	0.0299046	0.0472638	0.0493396	0.0870062	0.0549956	0.0625169	0.100334	0.26511	0.265231	0.0382984	0.0397479	0.0363548	0.0839796	0.0779205	0.0740427	0.0559864	0.0567135	0.194256	0.27969	0.101309	0.0460027	0.049799	0.0899955	0.0547864	0.0550097	0.0417597	0.0647611	0.216093	0.308099	0.0736936	F5H269	DmX-like protein 1 OS=Homo sapiens OX=9606 GN=DMXL1 PE=1 SV=1	unknown	NUCLEUS	0.897961	NUCLEUS
Q96S44	0.0274078	0.0434828	0.0676825	0.124695	0.0790153	0.0951949	0.132924	0.105133	0.0794337	0.245031	0.0421764	0.042719	0.078532	0.0704173	0.0930101	0.0749556	0.066619	0.0765095	0.0827989	0.372262	0.0347598	0.0460132	0.0904346	0.0676316	0.0762197	0.0728141	0.0881765	0.119901	0.11942	0.28463	Q96S44	TP53-regulating kinase OS=Homo sapiens OX=9606 GN=TP53RK PE=1 SV=2	unknown	CYTOSOL	0.833528	unknown
P98173	0.0863072	0.187392	0.167269	0.162396	0.0768747	0.0617827	0.0988838	0.0639837	0.0172929	0.077818	0.131733	0.116642	0.234863	0.192004	0.107587	0.0553956	0.0638001	0.0433692	0.0237741	0.0308321	0.0996774	0.186774	0.283548	0.121613	0.0687097	0.0470968	0.0490323	0.0690323	0.0419355	0.0325806	P98173	Protein FAM3A OS=Homo sapiens OX=9606 GN=FAM3A PE=1 SV=2	unknown	GOLGI	0.659911	GOLGI
P21964	0.0476025	0.0943388	0.125569	0.22883	0.130203	0.09932	0.0930394	0.0394594	0.0324858	0.109152	0.0595921	0.0735953	0.147781	0.190069	0.172209	0.104625	0.0739081	0.0274506	0.0223079	0.128462	0.0516519	0.10501	0.181118	0.136911	0.110594	0.0772969	0.0623029	0.0513417	0.0365028	0.187271	P21964	Catechol O-methyltransferase OS=Homo sapiens OX=9606 GN=COMT PE=1 SV=2	unknown	ER	0.30242	unknown
J3QR07	0.0573119	0.0332875	0.0398614	0.0696229	0.0387856	0.0586864	0.107273	0.24885	0.293731	0.0525907	0.0611454	0.0355984	0.0552822	0.0560151	0.0649147	0.0569574	0.0675322	0.183855	0.265417	0.153282	0.0970632	0.0549619	0.0528505	0.0406296	0.0403097	0.0412694	0.0502271	0.135261	0.325357	0.162071	J3QR07	YTH domain-containing protein 1 OS=Homo sapiens OX=9606 GN=YTHDC1 PE=1 SV=1	unknown	NUCLEUS	0.777867	unknown
Q8IWR0	0.0306829	0.0498127	0.064003	0.144875	0.122669	0.132673	0.264468	0.145482	0.0362921	0.00904163	0.0635275	0.0544642	0.130132	0.13498	0.153697	0.125537	0.162044	0.0916027	0.0488154	0.0351994	0.0325813	0.0615677	0.109228	0.128064	0.146966	0.158271	0.209135	0.126747	0.0186899	0.00875124	Q8IWR0	Zinc finger CCCH domain-containing protein 7A OS=Homo sapiens OX=9606 GN=ZC3H7A PE=1 SV=1	unknown	NUCLEUS	0.273713	unknown
Q7LG56	0.0388286	0.0546638	0.0637744	0.0939262	0.0908894	0.0915401	0.089154	0.0529284	0.0553145	0.36898	0.0300946	0.0443191	0.0710045	0.0652442	0.0943984	0.0764709	0.0604832	0.027861	0.0495503	0.480574	0.0313901	0.0509289	0.137732	0.0595772	0.0861627	0.0566944	0.0506086	0.073991	0.0813581	0.371557	Q7LG56	Ribonucleoside-diphosphate reductase subunit M2 B OS=Homo sapiens OX=9606 GN=RRM2B PE=1 SV=1	unknown	CYTOSOL	0.914966	CYTOSOL
P29350	0.0487515	0.0544663	0.0622472	0.102295	0.0659838	0.0721822	0.136627	0.204897	0.161816	0.0907333	0.0713966	0.0427613	0.0728667	0.0800895	0.091403	0.0791946	0.0722915	0.124768	0.167977	0.197252	0.0546513	0.0600059	0.0836769	0.0729676	0.0761124	0.0775148	0.0972334	0.149845	0.197994	0.129999	P29350	Tyrosine-protein phosphatase non-receptor type 6 OS=Homo sapiens OX=9606 GN=PTPN6 PE=1 SV=1	unknown	NUCLEUS	0.928431	NUCLEUS
Q15836	0.0818937	0.0926083	0.115406	0.160059	0.128528	0.116114	0.191919	0.0819409	0.017134	0.0143963	0.0797196	0.0851727	0.153207	0.172682	0.166191	0.146455	0.139185	0.0334978	0.00649182	0.0173981	0.108227	0.133904	0.167587	0.118857	0.118167	0.0912479	0.0900055	0.0893153	0.0433462	0.0393429	Q15836	Vesicle-associated membrane protein 3 OS=Homo sapiens OX=9606 GN=VAMP3 PE=1 SV=3	unknown	PM	0.299533	unknown
Q8WUF5	0.0516453	0.0592828	0.0762471	0.118452	0.0878311	0.0770279	0.170978	0.144786	0.131967	0.0817836	0.083116	0.0496508	0.0811616	0.075966	0.0920345	0.0969824	0.102612	0.115941	0.132884	0.169652	0.063225	0.0640349	0.116259	0.0699404	0.0809477	0.0800421	0.0940212	0.123134	0.12233	0.186065	Q8WUF5	RelA-associated inhibitor OS=Homo sapiens OX=9606 GN=PPP1R13L PE=1 SV=4	unknown	NUCLEUS	0.78881	unknown
Q6P5Z2	0.0470494	0.0759023	0.0755002	0.138836	0.0975168	0.0702724	0.153614	0.184176	0.140746	0.0163869	0.0923768	0.0410294	0.103787	0.0962612	0.089949	0.0816946	0.0816946	0.162175	0.175649	0.0753824	0.148912	0.141785	0.145161	0.0915229	0.0513878	0.0633908	0.096024	0.130533	0.0828957	0.0483871	Q6P5Z2	Serine/threonine-protein kinase N3 OS=Homo sapiens OX=9606 GN=PKN3 PE=1 SV=1	unknown	NUCLEUS	0.825338	unknown
P26583	0.143713	0.107034	0.102102	0.117058	0.0590332	0.060599	0.125409	0.129081	0.126381	0.0295886	0.262395	0.0590769	0.0788752	0.085801	0.0740786	0.0528608	0.0713621	0.0983799	0.122045	0.0951251	0.197457	0.09756	0.103711	0.0632766	0.0641173	0.0623539	0.0899528	0.116281	0.130921	0.0743695	P26583	High mobility group protein B2 OS=Homo sapiens OX=9606 GN=HMGB2 PE=1 SV=2	NUCLEUS-CHROMATIN	NUCLEUS-CHROMATIN	1	NUCLEUS-CHROMATIN
Q9Y3Z3	0.0255355	0.0355667	0.0535811	0.100457	0.0587191	0.0797782	0.129418	0.170901	0.175949	0.170095	0.030627	0.0330898	0.0655723	0.052551	0.0831031	0.065514	0.0647319	0.108372	0.137792	0.358646	0.0325704	0.0468173	0.084239	0.0544259	0.0588445	0.0544678	0.0695942	0.105606	0.111874	0.381561	Q9Y3Z3	Deoxynucleoside triphosphate triphosphohydrolase SAMHD1 OS=Homo sapiens OX=9606 GN=SAMHD1 PE=1 SV=2	unknown	CYTOSOL	0.364877	unknown
P49792	0.175345	0.0693305	0.0632092	0.110198	0.0663506	0.0689635	0.0948578	0.109831	0.135197	0.106719	0.160665	0.0500016	0.0867034	0.0904427	0.0875126	0.0642911	0.0545107	0.0885024	0.121033	0.196338	0.289961	0.121417	0.0871145	0.0644217	0.059347	0.0452658	0.0469234	0.0832845	0.106408	0.0958576	P49792	E3 SUMO-protein ligase RanBP2 OS=Homo sapiens OX=9606 GN=RANBP2 PE=1 SV=2	unknown	NUCLEUS-CHROMATIN	0.756323	NUCLEUS-CHROMATIN
O75940	0.0529159	0.0424574	0.041557	0.0822829	0.0732788	0.0688461	0.142748	0.215681	0.185413	0.0948192	0.0613697	0.0356222	0.075053	0.0668202	0.0812561	0.0779493	0.0887363	0.162261	0.189765	0.161167	0.0804648	0.0487278	0.0891909	0.0613974	0.0714031	0.0692635	0.0881002	0.148805	0.179074	0.163573	O75940	Survival of motor neuron-related-splicing factor 30 OS=Homo sapiens OX=9606 GN=SMNDC1 PE=1 SV=1	unknown	NUCLEUS	0.968583	NUCLEUS
M0R366	0.10522	0.0575041	0.0420065	0.131321	0.0852365	0.0685155	0.124796	0.190865	0.123165	0.0713703	0.101579	0.0381104	0.0849152	0.0802782	0.0833213	0.0586871	0.0599913	0.125779	0.111723	0.255615	0.100552	0.0582465	0.0564071	0.0447578	0.0754139	0.0803188	0.120172	0.177192	0.189454	0.0974862	M0R366	Fibronectin type III and SPRY domain-containing protein 1 OS=Homo sapiens OX=9606 GN=FSD1 PE=1 SV=1	unknown	NUCLEUS	0.86385	unknown
E9PHA2	0.0437441	0.0433853	0.0503863	0.0980636	0.0637692	0.0704113	0.155655	0.26326	0.196324	0.0150012	0.0615416	0.0395399	0.0716851	0.0797406	0.0886582	0.0748556	0.121656	0.220448	0.199768	0.0421069	0.0558477	0.0556267	0.084432	0.0730261	0.0793998	0.0789526	0.122834	0.234206	0.185456	0.0302189	E9PHA2	Condensin complex subunit 2 OS=Homo sapiens OX=9606 GN=NCAPH PE=1 SV=1	unknown	NUCLEUS	0.869164	unknown
Q96F44	0.0499684	0.0721063	0.0771664	0.145478	0.0974067	0.102467	0.0999367	0.104997	0.150538	0.0999367	0.0658335	0.0433022	0.0848442	0.0770991	0.101391	0.0774512	0.0841401	0.146453	0.151382	0.168104	0.0347349	0.0652041	0.113955	0.0834857	0.0975015	0.117611	0.145034	0.110299	0.0786106	0.153565	Q96F44	E3 ubiquitin-protein ligase TRIM11 OS=Homo sapiens OX=9606 GN=TRIM11 PE=1 SV=2	unknown	NUCLEUS	0.434825	unknown
J3QTR3	0.176568	0.0754919	0.0697448	0.133334	0.0863933	0.0649243	0.0948323	0.0652499	0.0521991	0.181263	0.126983	0.073038	0.131621	0.123217	0.103426	0.0691247	0.0651562	0.048779	0.0614156	0.19724	0.147762	0.0977981	0.126233	0.0844538	0.0700564	0.0620055	0.0765553	0.0767031	0.0974332	0.161	J3QTR3	Ubiquitin-40S ribosomal protein S27a (Fragment) OS=Homo sapiens OX=9606 GN=RPS27A PE=1 SV=1	unknown	NUCLEUS-CHROMATIN	0.345739	unknown
A0A0U1RRB3	0.0532319	0.0468948	0.0633714	0.115336	0.0766793	0.101394	0.129278	0.158428	0.157161	0.0982256	0.0450944	0.0384526	0.0843626	0.0767886	0.0866931	0.0765556	0.0875087	0.127942	0.150781	0.225821	0.0557576	0.0684848	0.102828	0.0680808	0.08	0.0488889	0.0890909	0.133535	0.124848	0.228485	A0A0U1RRB3	Cap-specific mRNA (nucleoside-2'-O-)-methyltransferase 2 OS=Homo sapiens OX=9606 GN=CMTR2 PE=1 SV=1	unknown	NUCLEUS	0.799037	unknown
Q6UW02	0.0576335	0.118705	0.180938	0.26415	0.143869	0.0992074	0.0845483	0.0233813	0.0104571	0.0171102	0.0638347	0.0839363	0.220059	0.265875	0.192122	0.0878719	0.0547104	0.0127422	0.00877131	0.0100773	0.0756021	0.125289	0.208213	0.19593	0.152168	0.0987235	0.0753854	0.0352601	0.0160886	0.017341	Q6UW02	Cytochrome P450 20A1 OS=Homo sapiens OX=9606 GN=CYP20A1 PE=1 SV=1	unknown	ER	0.935528	ER
Q9BRX5	0.0370973	0.0521256	0.0663922	0.105795	0.0870612	0.10104	0.113021	0.042244	0.0367473	0.358477	0.0390448	0.0444339	0.0804406	0.0573519	0.0941512	0.0879696	0.0641412	0.041026	0.0478417	0.443599	0.0389374	0.0579903	0.102107	0.0594929	0.0652117	0.0578735	0.0574213	0.0620459	0.0530738	0.445847	Q9BRX5	DNA replication complex GINS protein PSF3 OS=Homo sapiens OX=9606 GN=GINS3 PE=1 SV=1	unknown	CYTOSOL	0.932281	CYTOSOL
O75165	0.0432946	0.0708813	0.118566	0.232082	0.140743	0.129764	0.165855	0.0571374	0.0277724	0.0139048	0.075716	0.0619112	0.164601	0.207779	0.184544	0.111501	0.0909338	0.0403	0.0337969	0.0289173	0.049639	0.0862573	0.185859	0.17318	0.156534	0.119571	0.108907	0.0667264	0.0321656	0.0211611	O75165	DnaJ homolog subfamily C member 13 OS=Homo sapiens OX=9606 GN=DNAJC13 PE=1 SV=5	unknown	ER	0.271939	unknown
A0A087WUQ6	0.212951	0.263585	0.0870928	0.0759244	0.0414086	0.0521365	0.0663367	0.0200306	0.0153145	0.16522	0.293952	0.221976	0.145443	0.0534072	0.0592845	0.051661	0.0432709	0.018356	0.0184838	0.0941652	0.184037	0.251498	0.14308	0.0533121	0.0447483	0.0337813	0.0358122	0.0384863	0.0274854	0.18776	A0A087WUQ6	Glutathione peroxidase OS=Homo sapiens OX=9606 GN=GPX1 PE=1 SV=1	unknown	NUCLEUS-CHROMATIN	0.391234	unknown
Q02083	0.0606061	0.242424	0.239502	0.28479	0.0826446	0.0366892	0.0277986	0.0102262	0.00684531	0.00847316	0.0671963	0.190412	0.324535	0.214247	0.0937248	0.0253165	0.0270671	0.0111769	0.0154861	0.0308376	0.0802015	0.233854	0.33555	0.176322	0.0700588	0.0373132	0.0204534	0.0125945	0.0108144	0.022838	Q02083	N-acylethanolamine-hydrolyzing acid amidase OS=Homo sapiens OX=9606 GN=NAAA PE=1 SV=3	unknown	LYSOSOME	0.70019	LYSOSOME
A6NMQ1	0.0348515	0.0453121	0.0565466	0.106115	0.0658463	0.0808601	0.125166	0.145958	0.16341	0.175934	0.0443723	0.0363962	0.0666781	0.0565841	0.0719727	0.0659607	0.0607344	0.112673	0.16357	0.321059	0.047041	0.0675614	0.0935782	0.0576676	0.0633016	0.0579425	0.0530414	0.0682026	0.127977	0.363686	A6NMQ1	DNA polymerase OS=Homo sapiens OX=9606 GN=POLA1 PE=1 SV=1	unknown	CYTOSOL	0.358304	unknown
Q14974	0.0641776	0.0571983	0.0693347	0.115757	0.0752462	0.0948111	0.110175	0.0622977	0.0680361	0.282966	0.0536722	0.0405378	0.0750543	0.0635042	0.0836661	0.0776555	0.0598272	0.0414691	0.0521521	0.452461	0.0669759	0.0684052	0.102506	0.065069	0.0685655	0.055708	0.0599306	0.0729222	0.0804155	0.359502	Q14974	Importin subunit beta-1 OS=Homo sapiens OX=9606 GN=KPNB1 PE=1 SV=2	unknown	CYTOSOL	0.919803	CYTOSOL
P19367	0.149577	0.203104	0.109085	0.09774	0.054537	0.0628531	0.0929069	0.0701595	0.0691271	0.0909101	0.176661	0.121069	0.11688	0.0725274	0.0782058	0.0661417	0.0537486	0.0554676	0.0765488	0.182749	0.205866	0.249226	0.157892	0.0509929	0.0410659	0.0415659	0.0358409	0.0408962	0.0464193	0.130235	P19367	Hexokinase-1 OS=Homo sapiens OX=9606 GN=HK1 PE=1 SV=3	unknown	NUCLEUS-CHROMATIN	0.598043	NUCLEUS-CHROMATIN
Q9H0A8	0.0404796	0.0757729	0.117128	0.209066	0.123594	0.108574	0.10918	0.0766485	0.0779282	0.0616286	0.0656177	0.0694646	0.13483	0.163934	0.162452	0.0984423	0.0674781	0.0640411	0.0747304	0.0990099	0.0388961	0.135395	0.158918	0.177625	0.153177	0.0872384	0.0596407	0.0453788	0.0483423	0.095388	Q9H0A8	COMM domain-containing protein 4 OS=Homo sapiens OX=9606 GN=COMMD4 PE=1 SV=1	unknown	ER	0.328043	unknown
P50991	0.0318142	0.0335272	0.0445905	0.0848906	0.0554824	0.0590005	0.11515	0.265597	0.239367	0.0705803	0.0416812	0.0318712	0.0638759	0.0570679	0.0709633	0.0582386	0.0653405	0.173676	0.242942	0.194343	0.0396768	0.0489223	0.0825552	0.0550387	0.0599607	0.0538666	0.0713248	0.149298	0.256778	0.18258	P50991	T-complex protein 1 subunit delta OS=Homo sapiens OX=9606 GN=CCT4 PE=1 SV=4	unknown	NUCLEUS	0.895771	NUCLEUS
D6RHI9	0.0553886	0.204036	0.237613	0.329326	0.0623444	0.0159725	0.0691284	0.00626878	0.0108201	0.00910262	0.0635275	0.209658	0.293006	0.208455	0.0938306	0.0362032	0.0286991	0.01919	0.0172424	0.0301885	0.0771265	0.258253	0.33969	0.174759	0.0493714	0.0209633	0.0186122	0.0196898	0.0168163	0.0247184	D6RHI9	Ribonuclease T2 (Fragment) OS=Homo sapiens OX=9606 GN=RNASET2 PE=1 SV=8	unknown	LYSOSOME	0.579368	unknown
P33240	0.129671	0.0429503	0.0481602	0.0887722	0.0717069	0.0726094	0.152726	0.183575	0.120688	0.0891414	0.0973391	0.0384146	0.0551147	0.0718147	0.0808349	0.10136	0.150692	0.158733	0.117819	0.127878	0.15055	0.0794471	0.0859643	0.0642477	0.0678108	0.0696148	0.101006	0.161352	0.10281	0.117197	P33240	Cleavage stimulation factor subunit 2 OS=Homo sapiens OX=9606 GN=CSTF2 PE=1 SV=1	unknown	NUCLEUS	0.945153	NUCLEUS
Q6PL18	0.330198	0.107154	0.0710515	0.0944117	0.0503003	0.0436867	0.0763303	0.0737213	0.0709302	0.0822159	0.292649	0.0648073	0.0777362	0.0878192	0.0724508	0.0517157	0.0478127	0.0560254	0.0827777	0.166206	0.242159	0.121337	0.0565553	0.0586118	0.0544987	0.0622108	0.0560411	0.0894602	0.117224	0.141902	Q6PL18	ATPase family AAA domain-containing protein 2 OS=Homo sapiens OX=9606 GN=ATAD2 PE=1 SV=1	unknown	NUCLEUS-CHROMATIN	0.875078	NUCLEUS-CHROMATIN
P35998	0.0197744	0.0323864	0.0509254	0.0881637	0.0548871	0.0705858	0.0801357	0.128988	0.307339	0.166815	0.0255172	0.0283295	0.0559825	0.0466058	0.0660677	0.0555447	0.0439715	0.0788547	0.216693	0.382433	0.0251783	0.0395601	0.0679914	0.0429923	0.0455144	0.0362405	0.0397074	0.112931	0.354385	0.2355	P35998	26S proteasome regulatory subunit 7 OS=Homo sapiens OX=9606 GN=PSMC2 PE=1 SV=3	PROTEASOME	PROTEASOME	1	PROTEASOME
P12236	0.369676	0.383305	0.125852	0.0443995	0.0176746	0.0103279	0.0171422	0.0126704	0.00628194	0.0126704	0.469351	0.299584	0.153081	0.0297151	0.00764461	0.00745624	0.0059493	0.00419119	0.00470921	0.0183188	0.328063	0.413832	0.173742	0.0415908	0.0145025	0.00661236	0.00581377	0.00507906	0.00421658	0.00654847	P12236	ADP/ATP translocase 3 OS=Homo sapiens OX=9606 GN=SLC25A6 PE=1 SV=4	unknown	MITOCHONDRIA	0.949201	unknown
Q07864	0.083967	0.0697085	0.0763625	0.10488	0.0681242	0.0718209	0.113435	0.0901986	0.104351	0.217153	0.0959719	0.0475077	0.073334	0.0582421	0.0691891	0.0636625	0.0548411	0.0600489	0.0777979	0.399405	0.0627542	0.0592679	0.0947124	0.0493899	0.0538447	0.0443541	0.05675	0.0854155	0.128607	0.364904	Q07864	DNA polymerase epsilon catalytic subunit A OS=Homo sapiens OX=9606 GN=POLE PE=1 SV=5	unknown	CYTOSOL	0.650367	unknown
P29373	0.0407939	0.0571114	0.0718667	0.112082	0.0861011	0.121167	0.108205	0.0376114	0.046696	0.318366	0.0549431	0.0590829	0.114431	0.0872519	0.131395	0.0975566	0.084867	0.0435135	0.0598929	0.267066	0.0489083	0.0734002	0.138712	0.0888608	0.0918587	0.0753611	0.0689883	0.0742864	0.0575625	0.282062	P29373	Cellular retinoic acid-binding protein 2 OS=Homo sapiens OX=9606 GN=CRABP2 PE=1 SV=2	unknown	CYTOSOL	0.918035	CYTOSOL
Q9H0A0	0.0991607	0.0431338	0.0468551	0.0770053	0.0589514	0.0656876	0.130696	0.235479	0.213985	0.0290456	0.0917832	0.031672	0.0631651	0.0674476	0.0741041	0.0641671	0.0870115	0.199683	0.243522	0.0774443	0.124654	0.0655297	0.0593283	0.058929	0.0732032	0.0769225	0.122454	0.208726	0.184993	0.0252598	Q9H0A0	RNA cytidine acetyltransferase OS=Homo sapiens OX=9606 GN=NAT10 PE=1 SV=2	NUCLEUS	NUCLEUS	1	NUCLEUS
Q14435	0.0838036	0.173918	0.15984	0.16251	0.0828327	0.0745191	0.142484	0.0801019	0.0181443	0.021846	0.118711	0.113908	0.20117	0.175917	0.122894	0.0652233	0.0873388	0.0548046	0.0301716	0.0298617	0.0943207	0.192147	0.231875	0.124538	0.0827717	0.058587	0.059538	0.0801902	0.0452989	0.0307337	Q14435	Polypeptide N-acetylgalactosaminyltransferase 3 OS=Homo sapiens OX=9606 GN=GALNT3 PE=1 SV=2	unknown	GOLGI	0.782871	GOLGI
Q96Q05	0.0486486	0.0669316	0.0707472	0.108426	0.04531	0.0893482	0.185056	0.182353	0.195548	0.00763116	0.10659	0.0622028	0.0953423	0.115724	0.112176	0.0779044	0.0877935	0.143202	0.157017	0.0420473	0.0823413	0.0987103	0.132937	0.093254	0.0823413	0.0739087	0.100198	0.122024	0.168155	0.046131	Q96Q05	Trafficking protein particle complex subunit 9 OS=Homo sapiens OX=9606 GN=TRAPPC9 PE=1 SV=2	unknown	NUCLEUS	0.722061	unknown
Q9NR50	0.0373517	0.0453556	0.0504107	0.0938005	0.0736151	0.0854104	0.111528	0.146353	0.183388	0.172787	0.0364513	0.0330515	0.061432	0.0536274	0.0802637	0.0677881	0.0624076	0.0976468	0.144889	0.362443	0.0366359	0.0516473	0.0837307	0.0549636	0.0579659	0.051667	0.060615	0.109083	0.177057	0.316634	Q9NR50	Translation initiation factor eIF-2B subunit gamma OS=Homo sapiens OX=9606 GN=EIF2B3 PE=1 SV=1	unknown	NUCLEUS	0.360159	unknown
Q13630	0.0262266	0.0453602	0.0586811	0.104387	0.0832122	0.103107	0.0940419	0.0326275	0.0309321	0.421424	0.033257	0.0369924	0.0846488	0.0576575	0.0939872	0.0820581	0.058983	0.0274129	0.032775	0.492228	0.0500695	0.0773691	0.150057	0.0829558	0.0920457	0.0720843	0.0757384	0.0792414	0.0597632	0.260675	Q13630	GDP-L-fucose synthase OS=Homo sapiens OX=9606 GN=TSTA3 PE=1 SV=1	CYTOSOL	CYTOSOL	1	CYTOSOL
E9PRJ8	0.0881382	0.0984071	0.106716	0.187162	0.132987	0.124569	0.186074	0.0634276	0.0100874	0.00243115	0.15	0.0860606	0.156182	0.181697	0.163818	0.094303	0.114667	0.0335758	0.0118182	0.00787879	0.153706	0.183589	0.21793	0.143085	0.102691	0.0679654	0.0665346	0.0469429	0.0131528	0.00440262	E9PRJ8	Tetraspanin (Fragment) OS=Homo sapiens OX=9606 GN=CD81 PE=1 SV=1	unknown	PM	0.734102	PM
P18887	0.120458	0.145332	0.127165	0.152128	0.0716887	0.0648485	0.0806165	0.0758639	0.0824376	0.0794617	0.154195	0.0766762	0.126951	0.117522	0.0953336	0.0670866	0.0446174	0.0512378	0.0726638	0.193717	0.156886	0.120895	0.147804	0.0917379	0.0736807	0.0565794	0.0524014	0.0692549	0.0969604	0.133801	P18887	DNA repair protein XRCC1 OS=Homo sapiens OX=9606 GN=XRCC1 PE=1 SV=2	unknown	NUCLEUS-CHROMATIN	0.494398	unknown
A0A087X0W8	0.0359937	0.0565616	0.0786944	0.137357	0.0867874	0.104896	0.112408	0.0435949	0.0517326	0.291974	0.0542694	0.0486144	0.0776393	0.0645796	0.100134	0.0900116	0.0685787	0.0297435	0.0458025	0.420627	0.0409383	0.0629543	0.11834	0.0663483	0.0696522	0.0622935	0.061002	0.0674296	0.0599808	0.391061	A0A087X0W8	Transcription factor p65 OS=Homo sapiens OX=9606 GN=RELA PE=1 SV=1	unknown	CYTOSOL	0.935723	CYTOSOL
Q9UBP9	0.264563	0.165049	0.11165	0.114078	0.0679612	0.0412621	0.0230583	0.0946602	0.0837379	0.0339806	0.361481	0.114906	0.115097	0.0862152	0.0626497	0.0487595	0.0404732	0.0597758	0.0618354	0.0488074	0.243054	0.217482	0.169658	0.0832309	0.0563069	0.0427834	0.0416769	0.0442587	0.0630686	0.0384805	Q9UBP9	PTB domain-containing engulfment adapter protein 1 OS=Homo sapiens OX=9606 GN=GULP1 PE=1 SV=1	unknown	NUCLEUS-CHROMATIN	0.655852	NUCLEUS-CHROMATIN
O95747	0.0442787	0.0487086	0.0712442	0.118246	0.0722196	0.089228	0.158135	0.129178	0.145902	0.122859	0.0579496	0.0434766	0.073056	0.0774901	0.104133	0.0840931	0.0898324	0.106878	0.123116	0.239975	0.0492841	0.0635824	0.0973083	0.0684118	0.0737911	0.066672	0.0796104	0.114416	0.112407	0.274517	O95747	Serine/threonine-protein kinase OSR1 OS=Homo sapiens OX=9606 GN=OXSR1 PE=1 SV=1	unknown	NUCLEUS	0.511682	unknown
P11172	0.0548386	0.0787426	0.0824141	0.113505	0.0799925	0.0938662	0.103334	0.0766803	0.0802425	0.236384	0.062334	0.0524373	0.0782353	0.0609665	0.0817328	0.0713278	0.0545937	0.0576443	0.0774463	0.403282	0.0539816	0.0732119	0.106603	0.0620197	0.0623094	0.0554299	0.0555909	0.0669279	0.0639106	0.400014	P11172	Uridine 5'-monophosphate synthase OS=Homo sapiens OX=9606 GN=UMPS PE=1 SV=1	unknown	CYTOSOL	0.865236	CYTOSOL
Q96T51	0.0574722	0.119555	0.151553	0.218011	0.0949013	0.0696751	0.0833496	0.0438106	0.0443706	0.117302	0.0649663	0.0883138	0.161446	0.147521	0.113819	0.0740632	0.0574063	0.0447235	0.0556366	0.192105	0.0610354	0.113453	0.195473	0.131014	0.0830234	0.0529485	0.0417921	0.0525058	0.0459536	0.222803	Q96T51	RUN and FYVE domain-containing protein 1 OS=Homo sapiens OX=9606 GN=RUFY1 PE=1 SV=2	unknown	NUCLEUS-CHROMATIN	0.173264	unknown
P39687	0.0378371	0.048098	0.0684173	0.110237	0.0777331	0.0954872	0.105647	0.0436764	0.0551186	0.357748	0.0424315	0.0430301	0.0744879	0.0647779	0.094706	0.0804735	0.0711625	0.0341181	0.0401703	0.454642	0.0543317	0.0713324	0.11603	0.0677906	0.0599277	0.0448396	0.057236	0.0706949	0.0671531	0.390664	P39687	Acidic leucine-rich nuclear phosphoprotein 32 family member A OS=Homo sapiens OX=9606 GN=ANP32A PE=1 SV=1	unknown	CYTOSOL	0.933236	CYTOSOL
P49069	0.0521282	0.116989	0.170672	0.303324	0.155129	0.0893113	0.0781923	0.0162004	0.00789096	0.0101626	0.069983	0.0856819	0.247116	0.275676	0.157462	0.0707395	0.0476641	0.0150369	0.0115377	0.0191035	0.0877572	0.107878	0.253041	0.182335	0.154939	0.103672	0.0674093	0.0219393	0.0101171	0.0109128	P49069	Calcium signal-modulating cyclophilin ligand OS=Homo sapiens OX=9606 GN=CAMLG PE=1 SV=1	unknown	ER	0.93293	ER
F5H3M2	0.0458422	0.0495736	0.0472637	0.0716063	0.0483298	0.0545487	0.109986	0.288202	0.26688	0.0177683	0.0867793	0.0492137	0.0711124	0.060396	0.072452	0.0549214	0.0675597	0.218055	0.248282	0.0712289	0.0506579	0.0642732	0.0868639	0.065262	0.0701301	0.0798661	0.100936	0.210314	0.218225	0.0534723	F5H3M2	Kinesin-like protein OS=Homo sapiens OX=9606 GN=KIFC3 PE=1 SV=1	unknown	NUCLEUS	0.95393	NUCLEUS
Q9UJF2-2	0.0645407	0.0680971	0.0705643	0.100919	0.0699213	0.0679003	0.125315	0.21294	0.185551	0.034252	0.0993251	0.0508708	0.0921173	0.0948254	0.0830347	0.0623698	0.0824098	0.171902	0.185985	0.0771602	0.0701479	0.0627198	0.0830917	0.0626329	0.0714912	0.0713174	0.111295	0.204967	0.221467	0.0408702	Q9UJF2-2	Isoform 2 of Ras GTPase-activating protein nGAP OS=Homo sapiens OX=9606 GN=RASAL2	unknown	NUCLEUS	0.941617	NUCLEUS
Q9H6R4	0.232043	0.0477673	0.0275989	0.0674404	0.0524379	0.0515887	0.117118	0.206284	0.159154	0.0385677	0.171249	0.0416206	0.0638352	0.0656226	0.0594093	0.0566857	0.0901353	0.188442	0.194995	0.0680058	0.190572	0.0793715	0.0629868	0.0496911	0.054123	0.0478109	0.0944131	0.191647	0.176068	0.0533172	Q9H6R4	Nucleolar protein 6 OS=Homo sapiens OX=9606 GN=NOL6 PE=1 SV=2	unknown	NUCLEUS	0.957203	NUCLEUS
A0A087X211	0.0402263	0.0601646	0.0657613	0.0924897	0.0838066	0.103313	0.0960288	0.0604527	0.0724486	0.325309	0.0401912	0.0471121	0.0708489	0.0679582	0.0856357	0.068792	0.052282	0.0359386	0.0470009	0.48424	0.0472899	0.0704854	0.121224	0.0682602	0.0691739	0.0645466	0.0554098	0.0651802	0.068496	0.369934	A0A087X211	Protein CIP2A OS=Homo sapiens OX=9606 GN=CIP2A PE=1 SV=1	unknown	CYTOSOL	0.912032	CYTOSOL
Q70EL4	0.0374869	0.0447273	0.0490482	0.0811631	0.0539531	0.0616606	0.117716	0.266028	0.26089	0.0273269	0.0796571	0.0474192	0.0754599	0.0897482	0.0775138	0.0608144	0.0676014	0.191463	0.240579	0.0697446	0.0532155	0.0596336	0.0859013	0.0771879	0.0788456	0.0758278	0.117865	0.186254	0.199898	0.0653717	Q70EL4	Ubiquitin carboxyl-terminal hydrolase 43 OS=Homo sapiens OX=9606 GN=USP43 PE=1 SV=2	unknown	NUCLEUS	0.954199	NUCLEUS
Q8NDT2	0.0986432	0.0447378	0.0385039	0.0715072	0.0344701	0.0572057	0.156949	0.250825	0.23029	0.0168684	0.102454	0.0322858	0.0637107	0.068446	0.0770555	0.0650022	0.0822213	0.204477	0.213517	0.0908308	0.146572	0.072104	0.0531915	0.0614657	0.0496454	0.0862884	0.137116	0.154846	0.213948	0.0248227	Q8NDT2	Putative RNA-binding protein 15B OS=Homo sapiens OX=9606 GN=RBM15B PE=1 SV=3	unknown	NUCLEUS	0.951834	NUCLEUS
Q96SN8	0.0480953	0.0663138	0.0606307	0.0978469	0.0626766	0.0645926	0.120352	0.243432	0.196278	0.0397818	0.0752235	0.0489128	0.0763946	0.0721396	0.0774095	0.0664793	0.0749502	0.186361	0.221142	0.100988	0.0553696	0.0719421	0.0985568	0.0701312	0.0712835	0.0747407	0.11041	0.170389	0.168304	0.108873	Q96SN8	CDK5 regulatory subunit-associated protein 2 OS=Homo sapiens OX=9606 GN=CDK5RAP2 PE=1 SV=5	unknown	NUCLEUS	0.968892	NUCLEUS
P09382	0.0835979	0.0818615	0.0917098	0.175552	0.1247	0.0852709	0.115693	0.0300062	0.0101016	0.201507	0.124973	0.0865835	0.122955	0.116661	0.12745	0.0907719	0.0734052	0.0238793	0.0219747	0.211346	0.142697	0.137346	0.1848	0.106477	0.0748111	0.0496438	0.0466054	0.0361732	0.0274563	0.193991	P09382	Galectin-1 OS=Homo sapiens OX=9606 GN=LGALS1 PE=1 SV=2	unknown	CYTOSOL	0.336833	unknown
Q9UL26	0.0695808	0.112941	0.165286	0.219231	0.133853	0.0977201	0.123077	0.0390433	0.0139737	0.0252934	0.137515	0.0955619	0.178217	0.195513	0.146574	0.0944224	0.0806934	0.0268231	0.0130566	0.0316236	0.113933	0.142079	0.229478	0.148132	0.112136	0.0790739	0.0663883	0.0427348	0.0184471	0.0475977	Q9UL26	Ras-related protein Rab-22A OS=Homo sapiens OX=9606 GN=RAB22A PE=1 SV=2	unknown	PM	0.481428	unknown
Q8IX90	0.0531915	0.0409165	0.0509002	0.0919804	0.0900164	0.0648118	0.115221	0.231915	0.182651	0.0783961	0.0507535	0.0350565	0.0691712	0.0784847	0.0887401	0.0843449	0.102867	0.167225	0.161783	0.161574	0.0737561	0.0543813	0.0819022	0.0596653	0.0664905	0.0682519	0.093461	0.168098	0.180427	0.153567	Q8IX90	Spindle and kinetochore-associated protein 3 OS=Homo sapiens OX=9606 GN=SKA3 PE=1 SV=2	unknown	NUCLEUS	0.965375	NUCLEUS
Q5JVZ5	0.0625114	0.0617845	0.0694167	0.107142	0.0652735	0.077485	0.134545	0.19255	0.164674	0.0646193	0.0655388	0.0452824	0.0782482	0.0804366	0.0847291	0.0675308	0.0827091	0.171422	0.180989	0.143114	0.103475	0.0882561	0.1037	0.0769627	0.0715573	0.0705598	0.0949807	0.148938	0.125869	0.115701	Q5JVZ5	Engulfment and cell motility protein 2 OS=Homo sapiens OX=9606 GN=ELMO2 PE=1 SV=1	unknown	NUCLEUS	0.964194	NUCLEUS
O00443	0.0579372	0.0569572	0.0575827	0.114853	0.0805602	0.0907006	0.167946	0.195746	0.162239	0.0154782	0.104636	0.0514634	0.0840894	0.0925921	0.113384	0.093232	0.110676	0.144932	0.154715	0.0502801	0.112223	0.115925	0.119936	0.0810196	0.0837389	0.0803341	0.101552	0.141404	0.123729	0.0401385	O00443	Phosphatidylinositol 4-phosphate 3-kinase C2 domain-containing subunit alpha OS=Homo sapiens OX=9606 GN=PIK3C2A PE=1 SV=2	unknown	NUCLEUS	0.736634	unknown
Q9UJW0	0.0507853	0.0701577	0.0839135	0.130192	0.0802139	0.0869404	0.142132	0.12814	0.130528	0.0969966	0.0748636	0.0538792	0.106232	0.102467	0.110247	0.0745484	0.0793258	0.0881177	0.114692	0.195627	0.0440892	0.0529212	0.0915222	0.0737877	0.0823516	0.0783307	0.109384	0.1411	0.182931	0.143583	Q9UJW0	Dynactin subunit 4 OS=Homo sapiens OX=9606 GN=DCTN4 PE=1 SV=1	unknown	NUCLEUS	0.685823	unknown
Q03701	0.181875	0.0557638	0.0490125	0.0864447	0.0565566	0.0617222	0.123925	0.196603	0.172145	0.0159531	0.159079	0.0368711	0.0637525	0.0714113	0.0794939	0.0649028	0.091875	0.191046	0.179694	0.0618756	0.186533	0.0772824	0.062687	0.0553893	0.0585323	0.0554108	0.100553	0.203109	0.178654	0.02185	Q03701	CCAAT/enhancer-binding protein zeta OS=Homo sapiens OX=9606 GN=CEBPZ PE=1 SV=3	unknown	NUCLEUS	0.977121	NUCLEUS
P09012	0.102044	0.0512063	0.0492936	0.0805678	0.0667092	0.0686554	0.111104	0.226502	0.175095	0.0688232	0.0667873	0.0351719	0.0561687	0.0612185	0.079431	0.0640029	0.0881385	0.219119	0.230851	0.0991115	0.141621	0.0661001	0.0670529	0.0561566	0.0619506	0.0588154	0.0939786	0.20623	0.172158	0.0759359	P09012	U1 small nuclear ribonucleoprotein A OS=Homo sapiens OX=9606 GN=SNRPA PE=1 SV=3	unknown	NUCLEUS	0.983079	NUCLEUS
P29353	0.0720021	0.0853854	0.0702355	0.104176	0.0687366	0.0698608	0.111403	0.158833	0.151874	0.107495	0.0929503	0.0633608	0.0800418	0.0718604	0.089905	0.0863597	0.0757238	0.117631	0.130267	0.1919	0.10877	0.110518	0.127999	0.0817309	0.0669097	0.0643434	0.0724886	0.111838	0.105311	0.150091	P29353	SHC-transforming protein 1 OS=Homo sapiens OX=9606 GN=SHC1 PE=1 SV=4	unknown	NUCLEUS	0.791884	unknown
O95793	0.0266247	0.0405938	0.0576125	0.106706	0.0692426	0.0778537	0.167084	0.242288	0.195644	0.0163504	0.0515616	0.0420665	0.0880694	0.100182	0.0983696	0.0726798	0.121236	0.194733	0.189906	0.0411967	0.043465	0.0569675	0.0942006	0.0856381	0.0961481	0.0962716	0.154832	0.203902	0.153565	0.0150098	O95793	Double-stranded RNA-binding protein Staufen homolog 1 OS=Homo sapiens OX=9606 GN=STAU1 PE=1 SV=2	unknown	RIBOSOME	0.918869	RIBOSOME
O75054	0.103563	0.108096	0.144863	0.201524	0.12925	0.103437	0.144296	0.0463359	0.0114581	0.00717703	0.15212	0.0781556	0.18011	0.199513	0.142519	0.087418	0.0814009	0.0317085	0.0148063	0.0322493	0.145471	0.143297	0.225906	0.124275	0.0932971	0.0771739	0.0771739	0.0519928	0.0273551	0.034058	O75054	Immunoglobulin superfamily member 3 OS=Homo sapiens OX=9606 GN=IGSF3 PE=2 SV=3	unknown	PM	0.729402	PM
Q16658	0.0578868	0.0663199	0.0888632	0.159259	0.0843216	0.0890088	0.100547	0.0504629	0.0440774	0.259253	0.07741	0.0504919	0.103383	0.0984897	0.0969845	0.0648579	0.0502777	0.0389978	0.0471287	0.371978	0.0456638	0.0645495	0.108285	0.0714014	0.0678739	0.0532719	0.0624889	0.0659605	0.0603166	0.400189	Q16658	Fascin OS=Homo sapiens OX=9606 GN=FSCN1 PE=1 SV=3	unknown	CYTOSOL	0.851159	unknown
Q9NR45	0.024758	0.0460165	0.0876832	0.130004	0.0676184	0.127698	0.141745	0.0347331	0.0501047	0.289639	0.0401355	0.047019	0.0811789	0.0660499	0.0992037	0.0871667	0.068553	0.0561479	0.0607492	0.393796	0.0478345	0.0584982	0.111272	0.0625606	0.0674447	0.0562916	0.0607048	0.0654043	0.0593846	0.410605	Q9NR45	Sialic acid synthase OS=Homo sapiens OX=9606 GN=NANS PE=1 SV=2	CYTOSOL	CYTOSOL	1	CYTOSOL
P50914	0.0244168	0.0451554	0.0718597	0.105951	0.0787222	0.0740565	0.149262	0.2431	0.200574	0.00690281	0.0535225	0.0439873	0.100462	0.114583	0.0915685	0.0650478	0.0884193	0.20228	0.212734	0.0273955	0.0342137	0.0463503	0.0944788	0.0833722	0.0960335	0.100834	0.152616	0.220178	0.162381	0.00954213	P50914	60S ribosomal protein L14 OS=Homo sapiens OX=9606 GN=RPL14 PE=1 SV=4	RIBOSOME	RIBOSOME	1	RIBOSOME
Q9BW27	0.29255	0.0811076	0.0534171	0.105067	0.0722702	0.0706991	0.0638911	0.0370516	0.0428777	0.181068	0.177989	0.050214	0.090666	0.0805028	0.0820407	0.0680663	0.0510163	0.0246724	0.0394491	0.335384	0.28245	0.115684	0.0919368	0.0580811	0.0494078	0.041572	0.0324201	0.0474339	0.0537146	0.2273	Q9BW27	Nuclear pore complex protein Nup85 OS=Homo sapiens OX=9606 GN=NUP85 PE=1 SV=1	unknown	NUCLEUS-CHROMATIN	0.526967	unknown
Q9Y4P8	0.0392453	0.0709282	0.0870084	0.16534	0.107865	0.103964	0.15324	0.0737144	0.0814361	0.117258	0.0516029	0.0922385	0.142998	0.121625	0.137092	0.0946288	0.0828178	0.0465411	0.0688976	0.161558	0.0490857	0.0798845	0.150465	0.111165	0.0967276	0.0888675	0.0614373	0.0749118	0.0891883	0.198268	Q9Y4P8	WD repeat domain phosphoinositide-interacting protein 2 OS=Homo sapiens OX=9606 GN=WIPI2 PE=1 SV=1	unknown	CYTOSOL	0.355651	unknown
P07900	0.0275037	0.0484372	0.0728396	0.126971	0.0759721	0.114954	0.119082	0.0378613	0.0448436	0.331535	0.0301568	0.0396729	0.0743699	0.0603344	0.0902043	0.0766149	0.0591701	0.028674	0.0337232	0.50708	0.037716	0.0625998	0.118615	0.065097	0.0678425	0.0541222	0.0594556	0.0567913	0.051551	0.426209	P07900	Heat shock protein HSP 90-alpha OS=Homo sapiens OX=9606 GN=HSP90AA1 PE=1 SV=5	unknown	CYTOSOL	0.92119	CYTOSOL
Q13885	0.0278095	0.0522856	0.0653724	0.0983672	0.0777184	0.105528	0.0995092	0.0503411	0.0577796	0.365289	0.0318559	0.0316919	0.059939	0.0454381	0.0776221	0.0813622	0.0633837	0.0292313	0.0399921	0.539484	0.0380221	0.0584431	0.107162	0.0656391	0.062576	0.0550153	0.0584188	0.0598775	0.0619196	0.432927	Q13885	Tubulin beta-2A chain OS=Homo sapiens OX=9606 GN=TUBB2A PE=1 SV=1	unknown	CYTOSOL	0.914411	CYTOSOL
J3KNI1	0.0520269	0.0845232	0.0825538	0.105408	0.0857541	0.0893648	0.101551	0.107952	0.0944937	0.196373	0.065614	0.0571735	0.104717	0.0848538	0.0844055	0.068538	0.0622027	0.0650487	0.0792788	0.328168	0.0624234	0.0921116	0.142868	0.0763572	0.0668079	0.0534314	0.0525768	0.0806302	0.0825252	0.290269	J3KNI1	Conserved oligomeric Golgi complex subunit 4 OS=Homo sapiens OX=9606 GN=COG4 PE=1 SV=1	unknown	CYTOSOL	0.717632	unknown
Q92575	0.0573262	0.105824	0.163197	0.300166	0.156781	0.0889867	0.0861064	0.0193663	0.00948411	0.0127626	0.0568433	0.0846826	0.21922	0.266861	0.189866	0.0871287	0.0566104	0.0111823	0.00838672	0.0192196	0.0668189	0.106241	0.218592	0.187852	0.145857	0.105309	0.0835397	0.0390045	0.0219943	0.0247918	Q92575	UBX domain-containing protein 4 OS=Homo sapiens OX=9606 GN=UBXN4 PE=1 SV=2	unknown	ER	0.93022	ER
P63220	0.023755	0.0346394	0.0594573	0.121749	0.078926	0.0937366	0.171762	0.168092	0.213377	0.0345058	0.0392569	0.0451685	0.0809564	0.108788	0.121995	0.108565	0.164443	0.13985	0.162175	0.0288022	0.0322298	0.0555617	0.098612	0.0968908	0.0979678	0.0935289	0.142568	0.200757	0.151134	0.0307502	P63220	40S ribosomal protein S21 OS=Homo sapiens OX=9606 GN=RPS21 PE=1 SV=1	RIBOSOME	RIBOSOME	1	RIBOSOME
Q05823	0.0504112	0.0479441	0.0504934	0.103865	0.0609375	0.0786184	0.133717	0.202796	0.225658	0.0455592	0.0690894	0.0308472	0.0743714	0.0686668	0.0802873	0.0557786	0.0809212	0.172195	0.241496	0.126347	0.0944069	0.0803303	0.086524	0.071509	0.0792042	0.0780781	0.0940315	0.150526	0.134197	0.131194	Q05823	2-5A-dependent ribonuclease OS=Homo sapiens OX=9606 GN=RNASEL PE=1 SV=2	unknown	NUCLEUS	0.961296	NUCLEUS
Q5VXN0	0.134768	0.0473749	0.0353918	0.0730688	0.0522796	0.0569613	0.112529	0.253595	0.213689	0.0203433	0.126678	0.029942	0.0567072	0.0622667	0.0785482	0.056866	0.0841077	0.219125	0.239854	0.0459058	0.128599	0.0675096	0.0572206	0.0593793	0.0660798	0.0659116	0.120805	0.239844	0.180297	0.0143542	Q5VXN0	Ribosome production factor 2 homolog (Fragment) OS=Homo sapiens OX=9606 GN=RPF2 PE=1 SV=1	unknown	NUCLEUS	0.973272	NUCLEUS
Q1ED39	0.0697586	0.0330837	0.0423543	0.0772973	0.0571261	0.0695548	0.131902	0.256393	0.243276	0.0192543	0.0814322	0.0295192	0.059697	0.0722112	0.0823304	0.0714328	0.0905335	0.209808	0.235914	0.0671217	0.109384	0.0688969	0.0739867	0.0823154	0.0984175	0.109522	0.16005	0.176846	0.104988	0.0155932	Q1ED39	Lysine-rich nucleolar protein 1 OS=Homo sapiens OX=9606 GN=KNOP1 PE=1 SV=1	unknown	NUCLEUS	0.642463	unknown
Q9NUJ3	0.0331823	0.0624856	0.072279	0.0979338	0.0867578	0.107574	0.106421	0.0548813	0.0692834	0.309202	0.0480483	0.0443294	0.0805665	0.0673866	0.0835713	0.0681602	0.0436749	0.0238605	0.0340652	0.506337	0.0357898	0.0527629	0.0908844	0.0611138	0.059487	0.0526002	0.0574806	0.0729353	0.0889865	0.427959	Q9NUJ3	T-complex protein 11-like protein 1 OS=Homo sapiens OX=9606 GN=TCP11L1 PE=1 SV=1	unknown	CYTOSOL	0.88364	CYTOSOL
P18206	0.0323759	0.0528769	0.0724695	0.130078	0.0794248	0.0981554	0.107164	0.0365464	0.0408848	0.350024	0.0434485	0.0509437	0.0939318	0.0771548	0.107846	0.0902724	0.0707535	0.0344403	0.0428911	0.388318	0.048566	0.071698	0.125943	0.0724367	0.0698987	0.0546401	0.0602098	0.0627282	0.0548619	0.379018	P18206	Vinculin OS=Homo sapiens OX=9606 GN=VCL PE=1 SV=4	unknown	CYTOSOL	0.943715	CYTOSOL
Q9NW64	0.0621607	0.0418528	0.0467322	0.0853893	0.054876	0.0607175	0.167927	0.232355	0.231221	0.0167686	0.0745285	0.0347189	0.0569859	0.0586706	0.0749313	0.0637978	0.0851126	0.212196	0.246145	0.0929134	0.111059	0.0530218	0.0862928	0.0625234	0.075919	0.0809969	0.111682	0.169346	0.15081	0.0983489	Q9NW64	Pre-mRNA-splicing factor RBM22 OS=Homo sapiens OX=9606 GN=RBM22 PE=1 SV=1	NUCLEUS	NUCLEUS	1	NUCLEUS
A6NN50	0.0353609	0.0410002	0.057989	0.104806	0.0642312	0.0785246	0.147225	0.173329	0.197695	0.0998404	0.0614839	0.0453712	0.0795263	0.0781031	0.0889816	0.0696367	0.0685031	0.133147	0.158691	0.216557	0.0603103	0.0759979	0.105979	0.0726861	0.0881994	0.0726861	0.0630992	0.105804	0.123061	0.232177	A6NN50	Obscurin-like protein 1 OS=Homo sapiens OX=9606 GN=OBSL1 PE=1 SV=1	unknown	NUCLEUS	0.813378	unknown
Q9NW68-2	0.0455252	0.105041	0.113702	0.140351	0.0859427	0.0841661	0.128581	0.0803909	0.0590717	0.157229	0.0699891	0.0892565	0.132693	0.103894	0.0968137	0.0772059	0.0689679	0.0547386	0.0348584	0.271582	0.0695621	0.103436	0.191144	0.0936366	0.0777885	0.0581902	0.0618195	0.0851682	0.0633922	0.195863	Q9NW68-2	Isoform 2 of BSD domain-containing protein 1 OS=Homo sapiens OX=9606 GN=BSDC1	unknown	CYTOSOL	0.455893	unknown
O43310-2	0.0494727	0.0359859	0.0451262	0.0956216	0.07031	0.0825823	0.137872	0.220518	0.225184	0.0373282	0.0403584	0.0365568	0.0715862	0.0695156	0.0791216	0.069278	0.101219	0.202403	0.241574	0.088388	0.0363046	0.042732	0.0753638	0.0631445	0.0781184	0.0882893	0.115271	0.187456	0.192824	0.120497	O43310-2	Isoform 2 of CBP80/20-dependent translation initiation factor OS=Homo sapiens OX=9606 GN=CTIF	unknown	NUCLEUS	0.927828	NUCLEUS
Q14156	0.133625	0.101467	0.133	0.167968	0.116141	0.0995941	0.140805	0.0640025	0.0287231	0.0146737	0.238598	0.0949626	0.156773	0.168618	0.118924	0.0742682	0.063853	0.0319265	0.0250511	0.0270252	0.190831	0.18862	0.202816	0.111473	0.0842448	0.0588783	0.0499185	0.0453805	0.0331627	0.0346754	Q14156	Protein EFR3 homolog A OS=Homo sapiens OX=9606 GN=EFR3A PE=1 SV=2	unknown	PM	0.8051	PM
Q16531	0.0711633	0.0549118	0.0663703	0.0976517	0.0733123	0.0929077	0.101392	0.0788811	0.0976249	0.265784	0.062284	0.0400424	0.0756364	0.0614898	0.0870052	0.0715013	0.0610162	0.0524663	0.0757147	0.412844	0.0751867	0.0669554	0.0924241	0.0604161	0.0623628	0.0521093	0.0592615	0.0779276	0.106593	0.346764	Q16531	DNA damage-binding protein 1 OS=Homo sapiens OX=9606 GN=DDB1 PE=1 SV=1	unknown	CYTOSOL	0.868801	CYTOSOL
P31947	0.0282056	0.0500493	0.0727385	0.119336	0.0869375	0.108606	0.1227	0.0326373	0.0387017	0.340088	0.0281889	0.0387039	0.0697322	0.0606262	0.083462	0.084425	0.0718069	0.0297962	0.0296688	0.50359	0.0398498	0.0654575	0.116813	0.0716045	0.073783	0.0609792	0.0609488	0.0584851	0.048327	0.403753	P31947	14-3-3 protein sigma OS=Homo sapiens OX=9606 GN=SFN PE=1 SV=1	unknown	CYTOSOL	0.930648	CYTOSOL
Q5JSH3	0.0348605	0.0522705	0.0687448	0.145083	0.0861548	0.100975	0.124554	0.0568263	0.0573145	0.273217	0.0414333	0.0464124	0.0783765	0.0790581	0.10548	0.0904389	0.0713079	0.0389289	0.0429151	0.405649	0.0487862	0.069444	0.114127	0.0768363	0.0781676	0.0615975	0.0576038	0.0628818	0.0564761	0.37408	Q5JSH3	WD repeat-containing protein 44 OS=Homo sapiens OX=9606 GN=WDR44 PE=1 SV=1	unknown	CYTOSOL	0.931408	CYTOSOL
Q8WXI9	0.320191	0.0855304	0.0580691	0.0859595	0.0523957	0.050298	0.0851967	0.103695	0.108701	0.0499642	0.359501	0.0574925	0.0509505	0.0626491	0.0596475	0.047795	0.0567998	0.101208	0.122912	0.0810436	0.437008	0.136868	0.0568477	0.0341426	0.0327395	0.027042	0.0381394	0.0624601	0.0906076	0.0841447	Q8WXI9	Transcriptional repressor p66-beta OS=Homo sapiens OX=9606 GN=GATAD2B PE=1 SV=1	NUCLEUS-CHROMATIN	NUCLEUS-CHROMATIN	1	NUCLEUS-CHROMATIN
P24941	0.0654389	0.0616361	0.0663149	0.099985	0.0679599	0.0720619	0.111479	0.199222	0.187878	0.068024	0.0840802	0.0541553	0.0916564	0.0852026	0.0832054	0.058876	0.07487	0.144689	0.179368	0.143897	0.0752789	0.0679084	0.0995853	0.0767453	0.0832613	0.073764	0.0910883	0.143022	0.129252	0.160094	P24941	Cyclin-dependent kinase 2 OS=Homo sapiens OX=9606 GN=CDK2 PE=1 SV=2	NUCLEUS	NUCLEUS	1	NUCLEUS
P31946	0.0357642	0.053275	0.0684288	0.105716	0.0824457	0.0964916	0.105326	0.0417063	0.0378597	0.372987	0.0384486	0.044408	0.079838	0.0685155	0.103525	0.0778722	0.0687956	0.0320327	0.0333397	0.453224	0.0497849	0.0745843	0.124173	0.0769125	0.0706694	0.0553458	0.0651395	0.0684342	0.0552605	0.359696	P31946	14-3-3 protein beta/alpha OS=Homo sapiens OX=9606 GN=YWHAB PE=1 SV=3	unknown	CYTOSOL	0.940269	CYTOSOL
O15234	0.023671	0.0285991	0.0320326	0.0928664	0.0810713	0.0751737	0.187995	0.243254	0.157174	0.0781629	0.0376418	0.0426239	0.0902297	0.0622751	0.0902297	0.0714088	0.115693	0.157764	0.181567	0.150567	0.0341444	0.0330979	0.0758765	0.0613553	0.0741758	0.0779696	0.116693	0.276033	0.198325	0.0523286	O15234	Protein CASC3 OS=Homo sapiens OX=9606 GN=CASC3 PE=1 SV=2	unknown	NUCLEUS	0.750769	unknown
Q969T9	0.0396319	0.081142	0.0795455	0.132983	0.113918	0.0927874	0.113449	0.0529677	0.0538129	0.239763	0.0956803	0.0716195	0.140284	0.120023	0.140988	0.113972	0.0723231	0.043619	0.0782327	0.123259	0.0617802	0.0846617	0.172222	0.0990771	0.095111	0.0984669	0.080238	0.0793227	0.0793227	0.149798	Q969T9	WW domain-binding protein 2 OS=Homo sapiens OX=9606 GN=WBP2 PE=1 SV=1	unknown	CYTOSOL	0.578574	unknown
A0A0C4DG33	0.0637677	0.111248	0.111862	0.212047	0.0906577	0.058697	0.0799017	0.12016	0.0852797	0.0663798	0.0652587	0.0807625	0.196567	0.186205	0.128223	0.0529188	0.0488847	0.0703212	0.0856668	0.0851922	0.0633283	0.119578	0.214006	0.151355	0.104744	0.0665663	0.0530873	0.0619729	0.0623494	0.103012	A0A0C4DG33	Peroxisome biogenesis factor 1 OS=Homo sapiens OX=9606 GN=PEX1 PE=1 SV=1	unknown	GOLGI	0.237224	unknown
Q8N612	0.042053	0.0562914	0.0655629	0.103311	0.0847682	0.0880795	0.117881	0.131126	0.152649	0.158278	0.0472012	0.0350983	0.0726172	0.0674735	0.0711044	0.0708018	0.0738275	0.105598	0.130711	0.325567	0.0568469	0.0745119	0.108514	0.0644176	0.0843405	0.0609643	0.0703945	0.0848718	0.0917785	0.30336	Q8N612	FTS and Hook-interacting protein OS=Homo sapiens OX=9606 GN=FAM160A2 PE=1 SV=3	unknown	CYTOSOL	0.490152	unknown
E9PGP6	0.06724	0.0582486	0.0770133	0.111806	0.089914	0.0914777	0.084441	0.111415	0.0770133	0.231431	0.0586069	0.0481743	0.0883707	0.0794722	0.115373	0.0687327	0.060448	0.0515496	0.081927	0.347346	0.0502776	0.0462677	0.145281	0.0817397	0.0724861	0.0542875	0.0604565	0.0916101	0.123072	0.274522	E9PGP6	5'-AMP-activated protein kinase subunit gamma-2 OS=Homo sapiens OX=9606 GN=PRKAG2 PE=1 SV=1	unknown	CYTOSOL	0.765863	unknown
B4DHE8	0.0270847	0.0388803	0.0500862	0.12027	0.0859722	0.0923691	0.240269	0.213638	0.108838	0.0225932	0.0513903	0.0460682	0.0959205	0.109372	0.129025	0.0998267	0.163936	0.167989	0.107785	0.0286858	0.0464491	0.046146	0.0970088	0.0896399	0.0998693	0.109966	0.172953	0.226543	0.0840895	0.0273352	B4DHE8	RNA-binding protein Musashi homolog 2 OS=Homo sapiens OX=9606 GN=MSI2 PE=1 SV=1	unknown	RIBOSOME	0.512892	unknown
Q9H3N1	0.0666194	0.117132	0.195331	0.273319	0.125324	0.0955786	0.0814865	0.0181216	0.0111586	0.0159298	0.0678858	0.0900049	0.22015	0.274932	0.187719	0.0786407	0.055414	0.0071995	0.00419786	0.0138563	0.0838526	0.14741	0.25506	0.194209	0.138009	0.0771687	0.0593486	0.0219298	0.0115118	0.0115007	Q9H3N1	Thioredoxin-related transmembrane protein 1 OS=Homo sapiens OX=9606 GN=TMX1 PE=1 SV=1	ER	ER	1	ER
E7EU96	0.043175	0.0478038	0.0688349	0.109588	0.0650663	0.0833107	0.124139	0.11749	0.15569	0.184903	0.0450244	0.0415728	0.0706867	0.0601716	0.0880664	0.0771792	0.0723034	0.0805217	0.10773	0.356744	0.046833	0.0525593	0.0990752	0.0570058	0.0611132	0.0566941	0.0614687	0.0884101	0.126066	0.350775	E7EU96	Casein kinase II subunit alpha OS=Homo sapiens OX=9606 GN=CSNK2A1 PE=1 SV=1	unknown	CYTOSOL	0.642474	unknown
Q96ST3	0.219844	0.0723391	0.0403488	0.0711966	0.0526158	0.0476248	0.0831028	0.178773	0.177511	0.0566446	0.216984	0.0402539	0.0530268	0.0552717	0.0592971	0.0510915	0.0537235	0.149404	0.188806	0.132141	0.2759	0.113038	0.0737489	0.0480685	0.0438982	0.048727	0.058604	0.0983319	0.115452	0.124232	Q96ST3	Paired amphipathic helix protein Sin3a OS=Homo sapiens OX=9606 GN=SIN3A PE=1 SV=2	unknown	NUCLEUS-CHROMATIN	0.803833	NUCLEUS-CHROMATIN
K7ELG9	0.0336893	0.0488644	0.0523358	0.107812	0.0703541	0.077363	0.174034	0.255265	0.145634	0.0346481	0.04789	0.0480615	0.0883463	0.0842292	0.106416	0.0792829	0.118481	0.189587	0.171403	0.0663026	0.0374033	0.0514203	0.104402	0.0875967	0.0929134	0.10232	0.16192	0.240184	0.101205	0.020635	K7ELG9	Protein LSM12 homolog OS=Homo sapiens OX=9606 GN=LSM12 PE=1 SV=1	unknown	RIBOSOME	0.88398	RIBOSOME
P52565	0.0284284	0.0475249	0.0576034	0.105815	0.0803054	0.0954486	0.102091	0.0309141	0.0306511	0.421217	0.033462	0.0396776	0.0794687	0.0673781	0.102174	0.0993359	0.0795538	0.0295169	0.0312766	0.438156	0.0384717	0.0577241	0.111827	0.0663871	0.0685556	0.0555445	0.0635471	0.0644167	0.0551923	0.418334	P52565	Rho GDP-dissociation inhibitor 1 OS=Homo sapiens OX=9606 GN=ARHGDIA PE=1 SV=3	unknown	CYTOSOL	0.922573	CYTOSOL
O00762	0.0410236	0.0588845	0.0873253	0.111643	0.10488	0.105163	0.106199	0.0538655	0.048446	0.28257	0.0459454	0.055507	0.0879177	0.072718	0.110981	0.0957154	0.0666183	0.0318502	0.0489293	0.383818	0.0471381	0.0621349	0.12778	0.0733396	0.0753399	0.0701365	0.0595577	0.0637303	0.0575328	0.363311	O00762	Ubiquitin-conjugating enzyme E2 C OS=Homo sapiens OX=9606 GN=UBE2C PE=1 SV=1	unknown	CYTOSOL	0.919522	CYTOSOL
P11908	0.0199484	0.0282097	0.0403208	0.0719908	0.0478144	0.0711086	0.119267	0.240126	0.255514	0.1057	0.0244887	0.0267825	0.055079	0.0454725	0.0662452	0.0527026	0.055969	0.172173	0.284019	0.217068	0.0265323	0.0357594	0.0629458	0.0390649	0.0401167	0.0360953	0.0481683	0.153635	0.349401	0.208281	P11908	Ribose-phosphate pyrophosphokinase 2 OS=Homo sapiens OX=9606 GN=PRPS2 PE=1 SV=2	unknown	NUCLEUS	0.493271	unknown
[truncated: 3,427 more rows]

## Sheet: Column Legend
UniProt accession for protein group		Unique UniProt accession for quantified protein group reported by Proteome Discoverer (1% FDR).
UniProt protein description		UniProt description for protein accession.
[truncated: 34 more rows]
