# Supplementary material for: CFTR Rescue by Lumacaftor (VX-809) Induces an Extensive Reorganization of Mitochondria in the Cystic Fibrosis Bronchial Epithelium
Source: Cells. 2022 Jun 16;11(12):1938. doi: 10.3390/cells11121938 (PMC9222197; doi:10.3390/cells11121938)
Supplement: Supplementary file 1 [file cells-11-01938-s001.zip › Supplementary File_3.xlsx]

## Sheet: Supplementary File 3
Accession	Protein names	Gene	Control	Treated	Bayes Factor
Q8WVP7	Limb region 1 protein homolog (Differentiation-related gene 14 protein)	LMBR1	unknown	ER	252.999
Q12841	Follistatin-related protein 1 (Follistatin-like protein 1)	FSTL1	unknown	ER	42.9494
Q5BJH2	Transmembrane protein 128	TMEM128	ER	ER	174.237
Q92903	Phosphatidate cytidylyltransferase 1 (EC 2.7.7.41) (CDP-DAG synthase 1) (CDP-DG synthase 1) (CDP-diacylglycerol synthase 1) (CDS 1) (CDP-diglyceride pyrophosphorylase 1) (CDP-diglyceride synthase 1) (CTP:phosphatidate cytidylyltransferase 1)	CDS1	ER	ER	160.54
Q96KC8	DnaJ homolog subfamily C member 1 (DnaJ protein homolog MTJ1)	DNAJC1	ER	ER	101.665
Q9Y385	Ubiquitin-conjugating enzyme E2 J1 (EC 2.3.2.23) (E2 ubiquitin-conjugating enzyme J1) (Non-canonical ubiquitin-conjugating enzyme 1) (NCUBE-1) (Yeast ubiquitin-conjugating enzyme UBC6 homolog E) (HsUBC6e)	UBE2J1	ER	ER	95.8323
F5GXX5	Dolichyl-diphosphooligosaccharide--protein glycosyltransferase subunit DAD1 (Oligosaccharyl transferase subunit DAD1)	DAD1	ER	ER	85.2384
Q9UBV2	Protein sel-1 homolog 1 (Suppressor of lin-12-like protein 1) (Sel-1L)	SEL1L	ER	ER	80.3721
Q9NPA0	ER membrane protein complex subunit 7	EMC7	ER	ER	79.5681
Q14165	Malectin	MLEC	ER	ER	75.9237
Q6ZXV5	Protein O-mannosyl-transferase TMTC3 (EC 2.4.1.109) (Protein SMILE) (Transmembrane and TPR repeat-containing protein 3)	TMTC3	ER	ER	75.5089
Q8TCJ2	Dolichyl-diphosphooligosaccharide--protein glycosyltransferase subunit STT3B (Oligosaccharyl transferase subunit STT3B) (STT3-B) (EC 2.4.99.18) (Source of immunodominant MHC-associated peptides homolog)	STT3B	ER	ER	73.7683
Q96A57	Transmembrane protein 230	TMEM230	ER	ER	61.0583
B4DR61	Protein transport protein Sec61 subunit alpha isoform 1 (cDNA FLJ59739, highly similar to Protein transport protein Sec61 subunit alpha isoform 1)	SEC61A1	ER	ER	60.7136
Q8WUY8	N-acetyltransferase 14 (EC 2.3.1.-) (K562 cell-derived leucine-zipper-like protein 1)	NAT14	ER	ER	56.8972
A0A0J9YXF2	Paraoxonase 2, isoform CRA_a (Serum paraoxonase/arylesterase 2)	PON2	ER	ER	56.3951
Q9P0I2	ER membrane protein complex subunit 3 (Transmembrane protein 111)	EMC3	ER	ER	52.3573
Q96GC9	Vacuole membrane protein 1 (Transmembrane protein 49)	VMP1	ER	ER	51.2712
Q70UQ0-4	Inhibitor of nuclear factor kappa-B kinase-interacting protein (I kappa-B kinase-interacting protein) (IKBKB-interacting protein) (IKK-interacting protein)	IKBIP	ER	ER	49.0051
Q8NF37	Lysophosphatidylcholine acyltransferase 1 (LPC acyltransferase 1) (LPCAT-1) (LysoPC acyltransferase 1) (EC 2.3.1.23) (1-acylglycerol-3-phosphate O-acyltransferase) (EC 2.3.1.51) (1-acylglycerophosphocholine O-acyltransferase) (1-alkenylglycerophosphocholine O-acyltransferase) (EC 2.3.1.25) (1-alkylglycerophosphocholine O-acetyltransferase) (EC 2.3.1.67) (Acetyl-CoA:lyso-platelet-activating factor…	LPCAT1	ER	ER	46.1766
Q9Y2G8	DnaJ homolog subfamily C member 16	DNAJC16	ER	ER	45.2369
Q14696	LRP chaperone MESD (LDLR chaperone MESD) (Mesoderm development LRP chaperone MESD) (Mesoderm development candidate 2) (Mesoderm development protein) (Renal carcinoma antigen NY-REN-61)	MESD	ER	ER	44.4863
Q96G23	Ceramide synthase 2 (CerS2) (EC 2.3.1.-) (LAG1 longevity assurance homolog 2) (SP260) (Sphingosine N-acyltransferase CERS2) (EC 2.3.1.24) (Tumor metastasis-suppressor gene 1 protein)	CERS2	ER	ER	43.4428
O43402	ER membrane protein complex subunit 8 (Neighbor of COX4) (Protein FAM158B)	EMC8	ER	ER	42.8206
Q9BQE4	Selenoprotein S (SelS) (VCP-interacting membrane protein)	SELENOS	ER	ER	42.7254
Q15629	Translocating chain-associated membrane protein 1	TRAM1	ER	ER	42.2105
J3KPS0	DnaJ (Hsp40) homolog, subfamily B, member 12, isoform CRA_c (DnaJ homolog subfamily B member 12)	DNAJB12	ER	ER	42.1517
Q9BUV8	Respirasome Complex Assembly Factor 1 (Rab5-interacting protein) (RIP5)	RAB5IF	ER	ER	41.9454
G5E994	G protein-coupled receptor 107, isoform CRA_c (Protein GPR107)	GPR107	GOLGI	GOLGI	48.582
G3V3E8	Epididymal secretory protein E1 (NPC intracellular cholesterol transporter 2)	NPC2	LYSOSOME	LYSOSOME	48.5758
Q8WVM0	Dimethyladenosine transferase 1, mitochondrial (EC 2.1.1.-) (Mitochondrial 12S rRNA dimethylase 1) (Mitochondrial transcription factor B1) (h-mtTFB) (h-mtTFB1) (hTFB1M) (mtTFB1) (S-adenosylmethionine-6-N', N'-adenosyl(rRNA) dimethyltransferase 1)	TFB1M	unknown	MITOCHONDRIA	161.207
Q9Y3B7	39S ribosomal protein L11, mitochondrial (L11mt) (MRP-L11) (Mitochondrial large ribosomal subunit protein uL11m)	MRPL11	unknown	MITOCHONDRIA	129.647
U3KQ69	Mitochondrial GTPase 1	MTG1	unknown	MITOCHONDRIA	106.239
Q969S9	Ribosome-releasing factor 2, mitochondrial (RRF2mt) (Elongation factor G 2, mitochondrial) (EF-G2mt) (mEF-G 2) (Elongation factor G2) (hEFG2)	GFM2	unknown	MITOCHONDRIA	105.414
Q96E29	Transcription termination factor 3, mitochondrial (Mitochondrial transcription termination factor 3) (mTERF3) (mTERF domain-containing protein 1, mitochondrial)	MTERF3	unknown	MITOCHONDRIA	92.4292
O75616	GTPase Era, mitochondrial (H-ERA) (hERA) (Conserved ERA-like GTPase) (CEGA) (ERA-W) (ERA-like protein 1)	ERAL1	unknown	MITOCHONDRIA	69.0446
Q4G0N4	NAD kinase 2, mitochondrial (EC 2.7.1.23) (Mitochondrial NAD kinase) (NAD kinase domain-containing protein 1, mitochondrial)	NADK2	unknown	MITOCHONDRIA	68.4882
Q5T440	Putative transferase CAF17, mitochondrial (EC 2.1.-.-) (Iron-sulfur cluster assembly factor homolog)	IBA57	unknown	MITOCHONDRIA	57.5486
Q96D53	Atypical kinase COQ8B, mitochondrial (EC 2.7.-.-) (AarF domain-containing protein kinase 4) (Coenzyme Q protein 8B)	COQ8B	unknown	MITOCHONDRIA	53.4422
Q96DV4	39S ribosomal protein L38, mitochondrial (L38mt) (MRP-L38) (Mitochondrial large ribosomal subunit protein mL38)	MRPL38	unknown	MITOCHONDRIA	53.186
Q8TAE8	Growth arrest and DNA damage-inducible proteins-interacting protein 1 (39S ribosomal protein L59, mitochondrial) (MRP-L59) (CKII beta-associating protein) (CR6-interacting factor 1) (CRIF1) (Mitochondrial large ribosomal subunit protein mL64) (Papillomavirus L2-interacting nuclear protein 1) (PLINP) (PLINP-1) (p53-responsive gene 6 protein)	GADD45GIP1	unknown	MITOCHONDRIA	47.4427
Q96HY7	Probable 2-oxoglutarate dehydrogenase E1 component DHKTD1, mitochondrial (EC 1.2.4.2) (Dehydrogenase E1 and transketolase domain-containing protein 1)	DHTKD1	unknown	MITOCHONDRIA	45.4573
P82933	28S ribosomal protein S9, mitochondrial (MRP-S9) (S9mt) (Mitochondrial small ribosomal subunit protein uS9m)	MRPS9	unknown	MITOCHONDRIA	44.5224
P09669+A71A32A32:A91	Cytochrome c oxidase subunit 6C (Cytochrome c oxidase polypeptide VIc)	COX6C	MITOCHONDRIA	MITOCHONDRIA	493.287
O43181	NADH dehydrogenase [ubiquinone] iron-sulfur protein 4, mitochondrial (Complex I-18 kDa) (CI-18 kDa) (Complex I-AQDQ) (CI-AQDQ) (NADH-ubiquinone oxidoreductase 18 kDa subunit)	NDUFS4	MITOCHONDRIA	MITOCHONDRIA	165.044
P30049	ATP synthase subunit delta, mitochondrial (ATP synthase F1 subunit delta) (F-ATPase delta subunit)	ATP5F1D	MITOCHONDRIA	MITOCHONDRIA	114.386
P27144	Adenylate kinase 4, mitochondrial (AK 4) (EC 2.7.4.10) (EC 2.7.4.6) (Adenylate kinase 3-like) (GTP:AMP phosphotransferase AK4)	AK4	MITOCHONDRIA	MITOCHONDRIA	107.591
Q16795	NADH dehydrogenase [ubiquinone] 1 alpha subcomplex subunit 9, mitochondrial (Complex I-39kD) (CI-39kD) (NADH-ubiquinone oxidoreductase 39 kDa subunit)	NDUFA9	MITOCHONDRIA	MITOCHONDRIA	105.046
P43897	Elongation factor Ts, mitochondrial (EF-Ts) (EF-TsMt)	TSFM	MITOCHONDRIA	MITOCHONDRIA	101.152
G3V0I5	NADH dehydrogenase [ubiquinone] flavoprotein 1, mitochondrial (EC 7.1.1.2)	NDUFV1	MITOCHONDRIA	MITOCHONDRIA	101.048
P50213	Isocitrate dehydrogenase [NAD] subunit alpha, mitochondrial (EC 1.1.1.41) (Isocitric dehydrogenase subunit alpha) (NAD(+)-specific ICDH subunit alpha)	IDH3A	MITOCHONDRIA	MITOCHONDRIA	97.7844
Q3SY69	Mitochondrial 10-formyltetrahydrofolate dehydrogenase (Mitochondrial 10-FTHFDH) (mtFDH) (EC 1.5.1.6) (Aldehyde dehydrogenase family 1 member L2)	ALDH1L2	MITOCHONDRIA	MITOCHONDRIA	89.8616
P82675	28S ribosomal protein S5, mitochondrial (MRP-S5) (S5mt) (Mitochondrial small ribosomal subunit protein uS5m)	MRPS5	MITOCHONDRIA	MITOCHONDRIA	79.2254
Q00325	Phosphate carrier protein, mitochondrial (Phosphate transport protein) (PTP) (Solute carrier family 25 member 3)	SLC25A3	MITOCHONDRIA	MITOCHONDRIA	74.0676
O43837	Isocitrate dehydrogenase [NAD] subunit beta, mitochondrial (Isocitric dehydrogenase subunit beta) (NAD(+)-specific ICDH subunit beta)	IDH3B	MITOCHONDRIA	MITOCHONDRIA	72.1173
O43678	NADH dehydrogenase [ubiquinone] 1 alpha subcomplex subunit 2 (Complex I-B8) (CI-B8) (NADH-ubiquinone oxidoreductase B8 subunit)	NDUFA2	MITOCHONDRIA	MITOCHONDRIA	69.5879
O95299	NADH dehydrogenase [ubiquinone] 1 alpha subcomplex subunit 10, mitochondrial (Complex I-42kD) (CI-42kD) (NADH-ubiquinone oxidoreductase 42 kDa subunit)	NDUFA10	MITOCHONDRIA	MITOCHONDRIA	68.5897
Q9H9J2	39S ribosomal protein L44, mitochondrial (L44mt) (MRP-L44) (EC 3.1.26.-) (Mitochondrial large ribosomal subunit protein mL44)	MRPL44	MITOCHONDRIA	MITOCHONDRIA	62.7946
Q9H845	Complex I assembly factor ACAD9, mitochondrial (Acyl-CoA dehydrogenase family member 9) (ACAD-9) (EC 1.3.8.-)	ACAD9	MITOCHONDRIA	MITOCHONDRIA	62.516
P18859	ATP synthase-coupling factor 6, mitochondrial (ATPase subunit F6) (ATP synthase peripheral stalk subunit F6)	ATP5PF	MITOCHONDRIA	MITOCHONDRIA	60.6095
Q5JTZ9	Alanine--tRNA ligase, mitochondrial (EC 6.1.1.7) (Alanyl-tRNA synthetase) (AlaRS)	AARS2	MITOCHONDRIA	MITOCHONDRIA	60.3925
Q96SZ6-3	Mitochondrial tRNA methylthiotransferase CDK5RAP1 (EC 2.8.4.3) (CDK5 activator-binding protein C42) (CDK5 regulatory subunit-associated protein 1) (mt-tRNA-2-methylthio-N6-dimethylallyladenosine synthase) (mt-tRNA-N6-(dimethylallyl)adenosine(37) methylthiotransferase)	CDK5RAP1	MITOCHONDRIA	MITOCHONDRIA	60.349
P43304	Glycerol-3-phosphate dehydrogenase, mitochondrial (GPD-M) (GPDH-M) (EC 1.1.5.3) (mitohondrial glycerophosphate dehydrogenase gene) (mGDH) (mtGPD)	GPD2	MITOCHONDRIA	MITOCHONDRIA	58.6162
P36542	ATP synthase subunit gamma, mitochondrial (ATP synthase F1 subunit gamma) (F-ATPase gamma subunit)	ATP5F1C	MITOCHONDRIA	MITOCHONDRIA	57.8361
O95168	NADH dehydrogenase [ubiquinone] 1 beta subcomplex subunit 4 (Complex I-B15) (CI-B15) (NADH-ubiquinone oxidoreductase B15 subunit)	NDUFB4	MITOCHONDRIA	MITOCHONDRIA	57.223
Q9BYC9	39S ribosomal protein L20, mitochondrial (L20mt) (MRP-L20) (Mitochondrial large ribosomal subunit protein bL20m)	MRPL20	MITOCHONDRIA	MITOCHONDRIA	55.7075
P08559	Pyruvate dehydrogenase E1 component subunit alpha, somatic form, mitochondrial (EC 1.2.4.1) (PDHE1-A type I)	PDHA1	MITOCHONDRIA	MITOCHONDRIA	55.2319
A0A087X2D5	39S ribosomal protein L45, mitochondrial	MRPL45	MITOCHONDRIA	MITOCHONDRIA	54.7016
Q16595	Frataxin, mitochondrial (EC 1.16.3.1) (Friedreich ataxia protein) (Fxn) [Cleaved into: Frataxin intermediate form (i-FXN); Frataxin(56-210) (m56-FXN); Frataxin(78-210) (d-FXN) (m78-FXN); Frataxin mature form (Frataxin(81-210)) (m81-FXN)]	FXN	MITOCHONDRIA	MITOCHONDRIA	51.1945
P13995	Bifunctional methylenetetrahydrofolate dehydrogenase/cyclohydrolase, mitochondrial [Includes: NAD-dependent methylenetetrahydrofolate dehydrogenase (EC 1.5.1.15); Methenyltetrahydrofolate cyclohydrolase (EC 3.5.4.9)]	MTHFD2	MITOCHONDRIA	MITOCHONDRIA	50.2855
P40926	Malate dehydrogenase, mitochondrial (EC 1.1.1.37)	MDH2	MITOCHONDRIA	MITOCHONDRIA	50.062
Q9BYD6	39S ribosomal protein L1, mitochondrial (L1mt) (MRP-L1) (Mitochondrial large ribosomal subunit protein uL1m)	MRPL1	MITOCHONDRIA	MITOCHONDRIA	49.0384
Q6NUK1	Calcium-binding mitochondrial carrier protein SCaMC-1 (Mitochondrial ATP-Mg/Pi carrier protein 1) (Mitochondrial Ca(2+)-dependent solute carrier protein 1) (Small calcium-binding mitochondrial carrier protein 1) (Solute carrier family 25 member 24)	SLC25A24	MITOCHONDRIA	MITOCHONDRIA	48.9866
Q9P2R7	Succinate--CoA ligase [ADP-forming] subunit beta, mitochondrial (EC 6.2.1.5) (ATP-specific succinyl-CoA synthetase subunit beta) (A-SCS) (Succinyl-CoA synthetase beta-A chain) (SCS-betaA)	SUCLA2	MITOCHONDRIA	MITOCHONDRIA	48.4794
Q3ZCQ8	Mitochondrial import inner membrane translocase subunit TIM50	TIMM50	MITOCHONDRIA	MITOCHONDRIA	48.2003
Q00059	Transcription factor A, mitochondrial (mtTFA) (Mitochondrial transcription factor 1) (MtTF1) (Transcription factor 6) (TCF-6) (Transcription factor 6-like 2)	TFAM	MITOCHONDRIA	MITOCHONDRIA	48.1169
P54819	Adenylate kinase 2, mitochondrial (AK 2) (EC 2.7.4.3) (ATP-AMP transphosphorylase 2) (ATP:AMP phosphotransferase) (Adenylate monophosphate kinase) [Cleaved into: Adenylate kinase 2, mitochondrial, N-terminally processed]	AK2	MITOCHONDRIA	MITOCHONDRIA	48.0686
C9JFR7	Cytochrome c (Fragment)	CYCS	MITOCHONDRIA	MITOCHONDRIA	47.8557
O75306	NADH dehydrogenase [ubiquinone] iron-sulfur protein 2, mitochondrial (EC 7.1.1.2) (Complex I-49kD) (CI-49kD) (NADH-ubiquinone oxidoreductase 49 kDa subunit)	NDUFS2	MITOCHONDRIA	MITOCHONDRIA	47.7043
P22695	Cytochrome b-c1 complex subunit 2, mitochondrial (Complex III subunit 2) (Core protein II) (Ubiquinol-cytochrome-c reductase complex core protein 2)	UQCRC2	MITOCHONDRIA	MITOCHONDRIA	47.4499
P32322	Pyrroline-5-carboxylate reductase 1, mitochondrial (P5C reductase 1) (P5CR 1) (EC 1.5.1.2)	PYCR1	MITOCHONDRIA	MITOCHONDRIA	47.3318
Q9NYY8	FAST kinase domain-containing protein 2, mitochondrial	FASTKD2	MITOCHONDRIA	MITOCHONDRIA	45.6753
Q16698	2,4-dienoyl-CoA reductase, mitochondrial (EC 1.3.1.34) (2,4-dienoyl-CoA reductase [NADPH]) (4-enoyl-CoA reductase [NADPH]) (Short chain dehydrogenase/reductase family 18C member 1)	DECR1	MITOCHONDRIA	MITOCHONDRIA	45.6346
Q99714	3-hydroxyacyl-CoA dehydrogenase type-2 (EC 1.1.1.35) (17-beta-hydroxysteroid dehydrogenase 10) (17-beta-HSD 10) (EC 1.1.1.51) (2-methyl-3-hydroxybutyryl-CoA dehydrogenase) (MHBD) (3-hydroxy-2-methylbutyryl-CoA dehydrogenase) (EC 1.1.1.178) (3-hydroxyacyl-CoA dehydrogenase type II) (Endoplasmic reticulum-associated amyloid beta-peptide-binding protein) (Mitochondrial ribonuclease P protein 2) (Mit…	HSD17B10	MITOCHONDRIA	MITOCHONDRIA	44.7086
Q02252	Methylmalonate-semialdehyde dehydrogenase [acylating], mitochondrial (MMSDH) (Malonate-semialdehyde dehydrogenase [acylating]) (EC 1.2.1.18) (EC 1.2.1.27) (Aldehyde dehydrogenase family 6 member A1)	ALDH6A1	MITOCHONDRIA	MITOCHONDRIA	44.092
P36957	Dihydrolipoyllysine-residue succinyltransferase component of 2-oxoglutarate dehydrogenase complex, mitochondrial (EC 2.3.1.61) (2-oxoglutarate dehydrogenase complex component E2) (OGDC-E2) (Dihydrolipoamide succinyltransferase component of 2-oxoglutarate dehydrogenase complex) (E2K)	DLST	MITOCHONDRIA	MITOCHONDRIA	43.5688
Q9UMS0	NFU1 iron-sulfur cluster scaffold homolog, mitochondrial (HIRA-interacting protein 5)	NFU1	MITOCHONDRIA	MITOCHONDRIA	42.5827
Q16822	Phosphoenolpyruvate carboxykinase [GTP], mitochondrial (PEPCK-M) (EC 4.1.1.32)	PCK2	MITOCHONDRIA	MITOCHONDRIA	42.1721
Q9UIJ7	GTP:AMP phosphotransferase AK3, mitochondrial (EC 2.7.4.10) (Adenylate kinase 3) (AK 3) (Adenylate kinase 3 alpha-like 1)	AK3	MITOCHONDRIA	MITOCHONDRIA	41.8037
P11182	Lipoamide acyltransferase component of branched-chain alpha-keto acid dehydrogenase complex, mitochondrial (EC 2.3.1.168) (52 kDa mitochondrial autoantigen of primary biliary cirrhosis) (Branched chain 2-oxo-acid dehydrogenase complex component E2) (BCOADC-E2) (Branched-chain alpha-keto acid dehydrogenase complex component E2) (BCKAD-E2) (BCKADE2) (Dihydrolipoamide acetyltransferase component of …	DBT	MITOCHONDRIA	MITOCHONDRIA	41.3995
F6WH68	Regulator of telomere elongation helicase 1	RTEL1-TNFRSF6B	unknown	NUCLEUS	95.6807
O75530	Polycomb protein EED (hEED) (Embryonic ectoderm development protein) (WD protein associating with integrin cytoplasmic tails 1) (WAIT-1)	EED	unknown	NUCLEUS	62.5227
A0A0U1RQE4	SH3 domain-containing protein 19	SH3D19	NUCLEUS	NUCLEUS	58.6385
O15226	NF-kappa-B-repressing factor (NFkB-repressing factor) (Protein ITBA4) (Transcription factor NRF)	NKRF	NUCLEUS	NUCLEUS	55.7015
Q9C0F1	Centrosomal protein of 44 kDa (Cep44) (HBV PreS1-transactivated protein 3) (PS1TP3)	CEP44	NUCLEUS	NUCLEUS	54.6918
Q6UN15	Pre-mRNA 3'-end-processing factor FIP1 (hFip1) (FIP1-like 1 protein) (Factor interacting with PAP) (Rearranged in hypereosinophilia)	FIP1L1	NUCLEUS	NUCLEUS	50.8748
Q10570	Cleavage and polyadenylation specificity factor subunit 1 (Cleavage and polyadenylation specificity factor 160 kDa subunit) (CPSF 160 kDa subunit)	CPSF1	NUCLEUS	NUCLEUS	49.5128
O14979	Heterogeneous nuclear ribonucleoprotein D-like (hnRNP D-like) (hnRNP DL) (AU-rich element RNA-binding factor) (JKT41-binding protein) (Protein laAUF1)	HNRNPDL	NUCLEUS	NUCLEUS	48.8891
Q8NAV1	Pre-mRNA-splicing factor 38A	PRPF38A	NUCLEUS	NUCLEUS	47.77
Q14004	Cyclin-dependent kinase 13 (EC 2.7.11.22) (EC 2.7.11.23) (CDC2-related protein kinase 5) (Cell division cycle 2-like protein kinase 5) (Cell division protein kinase 13) (hCDK13) (Cholinesterase-related cell division controller)	CDK13	NUCLEUS	NUCLEUS	46.6598
Q9Y2I8	WD repeat-containing protein 37	WDR37	NUCLEUS	NUCLEUS	43.2376
Q14451	Growth factor receptor-bound protein 7 (B47) (Epidermal growth factor receptor GRB-7) (GRB7 adapter protein)	GRB7	NUCLEUS	NUCLEUS	43.1543
P55081	Microfibrillar-associated protein 1 (Spliceosome B complex protein MFAP1)	MFAP1	NUCLEUS	NUCLEUS	41.9363
Q9NYH9	U3 small nucleolar RNA-associated protein 6 homolog (Hepatocellular carcinoma-associated antigen 66) (Multiple hat domains protein)	UTP6	NUCLEUS	NUCLEUS	41.7859
Q9UBP9	PTB domain-containing engulfment adapter protein 1 (Cell death protein 6 homolog) (PTB domain adapter protein CED-6) (Protein GULP)	GULP1	unknown	NUCLEUS-CHROMATIN	61.6182
J3KMZ8	Zinc finger protein ubi-d4	DPF2	NUCLEUS-CHROMATIN	NUCLEUS-CHROMATIN	251.718
P84243	Histone H3.3	H3-3A	NUCLEUS-CHROMATIN	NUCLEUS-CHROMATIN	77.1837
P18754	Regulator of chromosome condensation (Cell cycle regulatory protein) (Chromosome condensation protein 1)	RCC1	NUCLEUS-CHROMATIN	NUCLEUS-CHROMATIN	74.6857
Q5QNW6	Histone H2B type 2-F (H2B-clustered histone 18)	H2BC18	NUCLEUS-CHROMATIN	NUCLEUS-CHROMATIN	74.0594
Q86YP4	Transcriptional repressor p66-alpha (Hp66alpha) (GATA zinc finger domain-containing protein 2A)	GATAD2A	NUCLEUS-CHROMATIN	NUCLEUS-CHROMATIN	67.539
P10412	Histone H1.4 (Histone H1b) (Histone H1s-4)	H1-4	NUCLEUS-CHROMATIN	NUCLEUS-CHROMATIN	67.0796
Q9UIG0	Tyrosine-protein kinase BAZ1B (EC 2.7.10.2) (Bromodomain adjacent to zinc finger domain protein 1B) (Williams syndrome transcription factor) (Williams-Beuren syndrome chromosomal region 10 protein) (Williams-Beuren syndrome chromosomal region 9 protein) (hWALp2)	BAZ1B	NUCLEUS-CHROMATIN	NUCLEUS-CHROMATIN	64.1952
Q16777	Histone H2A type 2-C (H2A-clustered histone 20) (Histone H2A-GL101) (Histone H2A/q)	H2AC20	NUCLEUS-CHROMATIN	NUCLEUS-CHROMATIN	57.5758
Q16778	Histone H2B type 2-E (H2B-clustered histone 21) (Histone H2B-GL105) (Histone H2B.q) (H2B/q)	H2BC21	NUCLEUS-CHROMATIN	NUCLEUS-CHROMATIN	56.6163
Q9NPF5	DNA methyltransferase 1-associated protein 1 (DNMAP1) (DNMT1-associated protein 1)	DMAP1	NUCLEUS-CHROMATIN	NUCLEUS-CHROMATIN	53.751
Q969G3	SWI/SNF-related matrix-associated actin-dependent regulator of chromatin subfamily E member 1 (BRG1-associated factor 57) (BAF57)	SMARCE1	NUCLEUS-CHROMATIN	NUCLEUS-CHROMATIN	51.8476
P17096	High mobility group protein HMG-I/HMG-Y (HMG-I(Y)) (High mobility group AT-hook protein 1) (High mobility group protein A1) (High mobility group protein R)	HMGA1	NUCLEUS-CHROMATIN	NUCLEUS-CHROMATIN	49.5255
P62805	Histone H4	H4C1	NUCLEUS-CHROMATIN	NUCLEUS-CHROMATIN	48.3682
Q9H2P0	Activity-dependent neuroprotector homeobox protein (Activity-dependent neuroprotective protein)	ADNP	NUCLEUS-CHROMATIN	NUCLEUS-CHROMATIN	47.9224
P52701	DNA mismatch repair protein Msh6 (hMSH6) (G/T mismatch-binding protein) (GTBP) (GTMBP) (MutS protein homolog 6) (MutS-alpha 160 kDa subunit) (p160)	MSH6	NUCLEUS-CHROMATIN	NUCLEUS-CHROMATIN	46.2527
Q15022	Polycomb protein SUZ12 (Chromatin precipitated E2F target 9 protein) (ChET 9 protein) (Joined to JAZF1 protein) (Suppressor of zeste 12 protein homolog)	SUZ12	NUCLEUS-CHROMATIN	NUCLEUS-CHROMATIN	44.9979
Q71UI9	Histone H2A.V (H2A.F/Z) (H2A.Z variant histone 2)	H2AZ2	NUCLEUS-CHROMATIN	NUCLEUS-CHROMATIN	42.6103
P35251	Replication factor C subunit 1 (Activator 1 140 kDa subunit) (A1 140 kDa subunit) (Activator 1 large subunit) (Activator 1 subunit 1) (DNA-binding protein PO-GA) (Replication factor C 140 kDa subunit) (RF-C 140 kDa subunit) (RFC140) (Replication factor C large subunit)	RFC1	NUCLEUS-CHROMATIN	NUCLEUS-CHROMATIN	41.584
E9PRY8	Elongation factor 1-delta	EEF1D	NUCLEUS	NUCLEUS-CHROMATIN	69.9522
P26641	Elongation factor 1-gamma (EF-1-gamma) (eEF-1B gamma)	EEF1G	NUCLEUS	NUCLEUS-CHROMATIN	53.0633
P24534	Elongation factor 1-beta (EF-1-beta)	EEF1B2	NUCLEUS	NUCLEUS-CHROMATIN	50.8298
Q92968	Peroxisomal membrane protein PEX13 (Peroxin-13)	PEX13	unknown	PEROXISOME	44.3707
O43808	Peroxisomal membrane protein PMP34 (34 kDa peroxisomal membrane protein) (Solute carrier family 25 member 17)	SLC25A17	PEROXISOME	PEROXISOME	44.7238
Q12846	Syntaxin-4 (Renal carcinoma antigen NY-REN-31)	STX4	PM	PM	63.3636
Q7Z3B1	Neuronal growth regulator 1 (IgLON family member 4)	NEGR1	PM	PM	56.8988
Q9HAC8	Ubiquitin domain-containing protein 1	UBTD1	PM	PM	53.5344
O43520	Phospholipid-transporting ATPase IC (EC 7.6.2.1) (ATPase class I type 8B member 1) (Familial intrahepatic cholestasis type 1) (P4-ATPase flippase complex alpha subunit ATP8B1)	ATP8B1	PM	PM	44.2333
P35914	Hydroxymethylglutaryl-CoA lyase, mitochondrial (HL) (HMG-CoA lyase) (EC 4.1.3.4) (3-hydroxy-3-methylglutarate-CoA lyase)	HMGCL	unknown	unknown	286.939
P84090	Enhancer of rudimentary homolog	ERH	unknown	unknown	207.002
Q9H2K0	Translation initiation factor IF-3, mitochondrial (IF-3(Mt)) (IF-3Mt) (IF3(mt)) (IF3mt)	MTIF3	unknown	unknown	196.218
O60911	Cathepsin L2 (EC 3.4.22.43) (Cathepsin U) (Cathepsin V)	CTSV	unknown	unknown	173.827
P08779	Keratin, type I cytoskeletal 16 (Cytokeratin-16) (CK-16) (Keratin-16) (K16)	KRT16	unknown	unknown	172.13
A8MXV4	Nucleoside diphosphate-linked moiety X motif 19 (Nudix motif 19) (EC 3.6.1.-)	NUDT19	unknown	unknown	145.547
Q96EY1	DnaJ homolog subfamily A member 3, mitochondrial (DnaJ protein Tid-1) (hTid-1) (Hepatocellular carcinoma-associated antigen 57) (Tumorous imaginal discs protein Tid56 homolog)	DNAJA3	unknown	unknown	143.782
P51688	N-sulphoglucosamine sulphohydrolase (EC 3.10.1.1) (Sulfoglucosamine sulfamidase) (Sulphamidase)	SGSH	unknown	unknown	130.53
Q86WA8	Lon protease homolog 2, peroxisomal (EC 3.4.21.53) (Lon protease-like protein 2) (Lon protease 2) (Peroxisomal Lon protease) (pLon)	LONP2	unknown	unknown	129.462
Q9HBH5	Retinol dehydrogenase 14 (EC 1.1.1.300) (Alcohol dehydrogenase PAN2) (Short chain dehydrogenase/reductase family 7C member 4)	RDH14	unknown	unknown	128.898
P02538	Keratin, type II cytoskeletal 6A (Cytokeratin-6A) (CK-6A) (Cytokeratin-6D) (CK-6D) (Keratin-6A) (K6A) (Type-II keratin Kb6) (allergen Hom s 5)	KRT6A	unknown	unknown	120.812
Q9H6U8	Alpha-1,2-mannosyltransferase ALG9 (EC 2.4.1.259) (EC 2.4.1.261) (Asparagine-linked glycosylation protein 9 homolog) (Disrupted in bipolar disorder protein 1) (Dol-P-Man:Man(6)GlcNAc(2)-PP-Dol alpha-1,2-mannosyltransferase) (Dol-P-Man:Man(8)GlcNAc(2)-PP-Dol alpha-1,2-mannosyltransferase)	ALG9	unknown	unknown	119.155
O96000	NADH dehydrogenase [ubiquinone] 1 beta subcomplex subunit 10 (Complex I-PDSW) (CI-PDSW) (NADH-ubiquinone oxidoreductase PDSW subunit)	NDUFB10	unknown	unknown	115.914
P45880	Voltage-dependent anion-selective channel protein 2 (VDAC-2) (hVDAC2) (Outer mitochondrial membrane protein porin 2)	VDAC2	unknown	unknown	113.373
H0YIV9	Uncharacterized protein (Fragment)		unknown	unknown	106.967
O00462	Beta-mannosidase (EC 3.2.1.25) (Lysosomal beta A mannosidase) (Mannanase) (Mannase)	MANBA	unknown	unknown	106.378
Q9NPJ3	Acyl-coenzyme A thioesterase 13 (Acyl-CoA thioesterase 13) (EC 3.1.2.-) (Thioesterase superfamily member 2) [Cleaved into: Acyl-coenzyme A thioesterase 13, N-terminally processed]	ACOT13	unknown	unknown	106.297
Q9NUL7	Probable ATP-dependent RNA helicase DDX28 (EC 3.6.4.13) (Mitochondrial DEAD box protein 28)	DDX28	unknown	unknown	105.877
Q9Y6M9	NADH dehydrogenase [ubiquinone] 1 beta subcomplex subunit 9 (Complex I-B22) (CI-B22) (LYR motif-containing protein 3) (NADH-ubiquinone oxidoreductase B22 subunit)	NDUFB9	unknown	unknown	104.987
O60248	Protein SOX-15 (Protein SOX-12) (Protein SOX-20)	SOX15	unknown	unknown	98.9407
Q9NS69	Mitochondrial import receptor subunit TOM22 homolog (hTom22) (1C9-2) (Translocase of outer membrane 22 kDa subunit homolog)	TOMM22	unknown	unknown	86.0656
Q9Y530	ADP-ribose glycohydrolase OARD1 (O-acetyl-ADP-ribose deacetylase 1) (EC 3.5.1.-) (Terminal ADP-ribose protein glycohydrolase 1) ([Protein ADP-ribosylglutamate] hydrolase OARD1) (EC 3.2.2.-)	OARD1	unknown	unknown	78.8865
P23919	Thymidylate kinase (EC 2.7.4.9) (dTMP kinase)	DTYMK	unknown	unknown	77.8898
Q9HCD5	Nuclear receptor coactivator 5 (NCoA-5) (Coactivator independent of AF-2) (CIA)	NCOA5	unknown	unknown	77.8436
O60831	PRA1 family protein 2	PRAF2	unknown	unknown	77.5203
C9JJ19	28S ribosomal protein S34, mitochondrial	MRPS34	unknown	unknown	76.4376
A2IDC6	39S ribosomal protein L28, mitochondrial (Fragment)	MRPL28	unknown	unknown	75.7712
Q9BSH4	Translational activator of cytochrome c oxidase 1 (Coiled-coil domain-containing protein 44) (Translational activator of mitochondrially-encoded cytochrome c oxidase I)	TACO1	unknown	unknown	75.6462
P61081	NEDD8-conjugating enzyme Ubc12 (EC 2.3.2.-) (NEDD8 carrier protein) (Ubiquitin-conjugating enzyme E2 M)	UBE2M	unknown	unknown	72.0171
Q96EH3	Mitochondrial assembly of ribosomal large subunit protein 1	MALSU1	unknown	unknown	66.7437
Q02224	Centromere-associated protein E (Centromere protein E) (CENP-E) (Kinesin-7) (Kinesin-related protein CENPE)	CENPE	unknown	unknown	65.8303
Q96AT1	Uncharacterized protein KIAA1143	KIAA1143	unknown	unknown	63.453
Q13257	Mitotic spindle assembly checkpoint protein MAD2A (HsMAD2) (Mitotic arrest deficient 2-like protein 1) (MAD2-like protein 1)	MAD2L1	unknown	unknown	61.6773
P13645	Keratin, type I cytoskeletal 10 (Cytokeratin-10) (CK-10) (Keratin-10) (K10)	KRT10	unknown	unknown	60.8933
Q9NX40	OCIA domain-containing protein 1 (Ovarian cancer immunoreactive antigen domain containing 1) (Ovarian carcinoma immunoreactive antigen)	OCIAD1	unknown	unknown	59.4504
P46531	Neurogenic locus notch homolog protein 1 (Notch 1) (hN1) (Translocation-associated notch protein TAN-1) [Cleaved into: Notch 1 extracellular truncation (NEXT); Notch 1 intracellular domain (NICD)]	NOTCH1	unknown	unknown	59.4107
Q9HCN8	Stromal cell-derived factor 2-like protein 1 (SDF2-like protein 1) (PWP1-interacting protein 8)	SDF2L1	unknown	unknown	59.3763
P62328	Thymosin beta-4 (T beta-4) (Fx) [Cleaved into: Hematopoietic system regulatory peptide (Seraspenide)]	TMSB4X	unknown	unknown	58.9488
Q9P015	39S ribosomal protein L15, mitochondrial (L15mt) (MRP-L15) (Mitochondrial large ribosomal subunit protein uL15m)	MRPL15	unknown	unknown	57.5089
C9JRZ6	MICOS complex subunit	CHCHD3	unknown	unknown	57.1819
Q9UGN5-2	Poly [ADP-ribose] polymerase 2 (PARP-2) (hPARP-2) (EC 2.4.2.30) (ADP-ribosyltransferase diphtheria toxin-like 2) (ARTD2) (DNA ADP-ribosyltransferase PARP2) (EC 2.4.2.-) (NAD(+) ADP-ribosyltransferase 2) (ADPRT-2) (Poly[ADP-ribose] synthase 2) (pADPRT-2) (Protein poly-ADP-ribosyltransferase PARP2) (EC 2.4.2.-)	PARP2	unknown	unknown	56.6794
A0A1W2PPG1	Golgi SNAP receptor complex member 2	GOSR2	unknown	unknown	55.5683
O60784	Target of Myb protein 1	TOM1	unknown	unknown	54.7458
Q96LI5	CCR4-NOT transcription complex subunit 6-like (EC 3.1.13.4) (Carbon catabolite repressor protein 4 homolog B)	CNOT6L	unknown	unknown	54.5381
P04264	Keratin, type II cytoskeletal 1 (67 kDa cytokeratin) (Cytokeratin-1) (CK-1) (Hair alpha protein) (Keratin-1) (K1) (Type-II keratin Kb1)	KRT1	unknown	unknown	54.2005
Q96P48-1	Arf-GAP with Rho-GAP domain, ANK repeat and PH domain-containing protein 1 (Centaurin-delta-2) (Cnt-d2)	ARAP1	unknown	unknown	53.4122
Q04912	Macrophage-stimulating protein receptor (MSP receptor) (EC 2.7.10.1) (CDw136) (Protein-tyrosine kinase 8) (p185-Ron) (CD antigen CD136) [Cleaved into: Macrophage-stimulating protein receptor alpha chain; Macrophage-stimulating protein receptor beta chain]	MST1R	unknown	unknown	52.725
Q8NCE2	Myotubularin-related protein 14 (EC 3.1.3.-) (HCV NS5A-transactivated protein 4 splice variant A-binding protein 1) (NS5ATP4ABP1) (hJumpy)	MTMR14	unknown	unknown	50.6043
P35908	Keratin, type II cytoskeletal 2 epidermal (Cytokeratin-2e) (CK-2e) (Epithelial keratin-2e) (Keratin-2 epidermis) (Keratin-2e) (K2e) (Type-II keratin Kb2)	KRT2	unknown	unknown	49.6362
Q6VN20	Ran-binding protein 10 (RanBP10)	RANBP10	unknown	unknown	49.292
A0A0U1RRK1	Calcium uptake protein 1, mitochondrial	MICU1	unknown	unknown	49.0302
J3KS15	Peptidyl-tRNA hydrolase ICT1, mitochondrial (Fragment)	MRPL58	unknown	unknown	48.9725
Q96DB5	Regulator of microtubule dynamics protein 1 (RMD-1) (hRMD-1) (Protein FAM82B)	RMDN1	unknown	unknown	48.4826
Q9Y237	Peptidyl-prolyl cis-trans isomerase NIMA-interacting 4 (EC 5.2.1.8) (Parvulin-14) (Par14) (hPar14) (Parvulin-17) (Par17) (hPar17) (Peptidyl-prolyl cis-trans isomerase Pin4) (PPIase Pin4) (Peptidyl-prolyl cis/trans isomerase EPVH) (hEPVH) (Rotamase Pin4)	PIN4	unknown	unknown	48.3685
Q6YN16	Hydroxysteroid dehydrogenase-like protein 2 (EC 1.-.-.-) (Short chain dehydrogenase/reductase family 13C member 1)	HSDL2	unknown	unknown	48.2843
Q8N488	RING1 and YY1-binding protein (Apoptin-associating protein 1) (APAP-1) (Death effector domain-associated factor) (DED-associated factor) (YY1 and E4TF1-associated factor 1)	RYBP	unknown	unknown	47.9957
Q9BW92	Threonine--tRNA ligase, mitochondrial (EC 6.1.1.3) (Threonyl-tRNA synthetase) (ThrRS) (Threonyl-tRNA synthetase-like 1)	TARS2	unknown	unknown	47.8113
K4DIA8	Mitochondrial glutamate carrier 1 (Fragment)	SLC25A22	unknown	unknown	47.8112
Q8IXQ3	Uncharacterized protein C9orf40	C9orf40	unknown	unknown	47.3116
Q9H2D6	TRIO and F-actin-binding protein (Protein Tara) (Trio-associated repeat on actin)	TRIOBP	unknown	unknown	47.2275
H7BYZ9	Mitochondrial amidoxime-reducing component 1 (Fragment)	MTARC1	unknown	unknown	46.5858
Q15024	Exosome complex component RRP42 (Exosome component 7) (Ribosomal RNA-processing protein 42) (p8)	EXOSC7	unknown	unknown	46.4253
Q9P2C4	Transmembrane protein 181	TMEM181	unknown	unknown	45.6981
Q5T0F9	Coiled-coil and C2 domain-containing protein 1B (Five prime repressor element under dual repression-binding protein 2) (FRE under dual repression-binding protein 2) (Freud-2)	CC2D1B	unknown	unknown	45.5484
F8WA39	Phosphatidylinositol-3,5-bisphosphate 3-phosphatase (EC 3.1.3.64) (EC 3.1.3.95) (Phosphatidylinositol-3-phosphate phosphatase)	MTMR1	unknown	unknown	45.3112
P12532	Creatine kinase U-type, mitochondrial (EC 2.7.3.2) (Acidic-type mitochondrial creatine kinase) (Mia-CK) (Ubiquitous mitochondrial creatine kinase) (U-MtCK)	CKMT1A	unknown	unknown	45.0098
A0A0C4DGA2	Enoyl-CoA delta isomerase 2, mitochondrial (Testicular secretory protein Li 33)	ECI2	unknown	unknown	44.6826
F6TB26	Tudor and KH domain-containing protein	TDRKH	unknown	unknown	44.5437
H3BMD8	cAMP-regulated phosphoprotein 19	ARPP19	unknown	unknown	44.3873
Q9NWU5	39S ribosomal protein L22, mitochondrial (L22mt) (MRP-L22) (39S ribosomal protein L25, mitochondrial) (L25mt) (MRP-L25) (Mitochondrial large ribosomal subunit protein uL22m)	MRPL22	unknown	unknown	43.7273
Q8WWC4	m-AAA protease-interacting protein 1, mitochondrial (Matrix AAA peptidase-interacting protein 1)	MAIP1	unknown	unknown	43.6347
P35527	Keratin, type I cytoskeletal 9 (Cytokeratin-9) (CK-9) (Keratin-9) (K9)	KRT9	unknown	unknown	43.192
C9JG87	39S ribosomal protein L39, mitochondrial (Fragment)	MRPL39	unknown	unknown	41.7688
Q66K74	Microtubule-associated protein 1S (MAP-1S) (BPY2-interacting protein 1) (Microtubule-associated protein 8) (Variable charge Y chromosome 2-interacting protein 1) (VCY2-interacting protein 1) (VCY2IP-1) [Cleaved into: MAP1S heavy chain; MAP1S light chain]	MAP1S	unknown	unknown	41.5662
Q9NP80	Calcium-independent phospholipase A2-gamma (EC 3.1.1.5) (Intracellular membrane-associated calcium-independent phospholipase A2 gamma) (iPLA2-gamma) (PNPLA-gamma) (Patatin-like phospholipase domain-containing protein 8) (iPLA2-2)	PNPLA8	unknown	unknown	41.4567
P17612	cAMP-dependent protein kinase catalytic subunit alpha (PKA C-alpha) (EC 2.7.11.11)	PRKACA	unknown	unknown	41.4136
Q709F0	Acyl-CoA dehydrogenase family member 11 (ACAD-11) (EC 1.3.8.-)	ACAD11	PEROXISOME	unknown	100.174
B7Z2R7	Acyl-CoA-binding domain-containing protein 5	ACBD5	PEROXISOME	unknown	49.9758
P05204	Non-histone chromosomal protein HMG-17 (High mobility group nucleosome-binding domain-containing protein 2)	HMGN2	NUCLEUS-CHROMATIN	unknown	160.683
Q9UBD5	Origin recognition complex subunit 3 (Origin recognition complex subunit Latheo)	ORC3	NUCLEUS-CHROMATIN	unknown	156.725
Q8NFC6	Biorientation of chromosomes in cell division protein 1-like 1	BOD1L1	NUCLEUS-CHROMATIN	unknown	89.0033
A0A0A0MTH9	TATA-binding protein-associated factor 172	BTAF1	NUCLEUS-CHROMATIN	unknown	43.4477
Q96SB8	Structural maintenance of chromosomes protein 6 (SMC protein 6) (SMC-6) (hSMC6)	SMC6	NUCLEUS	unknown	77.6072
Q15032	R3H domain-containing protein 1	R3HDM1	NUCLEUS	unknown	49.0536
Q5SXM2	snRNA-activating protein complex subunit 4 (SNAPc subunit 4) (Proximal sequence element-binding transcription factor subunit alpha) (PSE-binding factor subunit alpha) (PTF subunit alpha) (snRNA-activating protein complex 190 kDa subunit) (SNAPc 190 kDa subunit)	SNAPC4	NUCLEUS	unknown	46.9942
Q9UI09	NADH dehydrogenase [ubiquinone] 1 alpha subcomplex subunit 12 (13 kDa differentiation-associated protein) (Complex I-B17.2) (CI-B17.2) (CIB17.2) (NADH-ubiquinone oxidoreductase subunit B17.2)	NDUFA12	MITOCHONDRIA	unknown	115.781
P12235	ADP/ATP translocase 1 (ADP,ATP carrier protein 1) (ADP,ATP carrier protein, heart/skeletal muscle isoform T1) (Adenine nucleotide translocator 1) (ANT 1) (Solute carrier family 25 member 4)	SLC25A4	MITOCHONDRIA	unknown	90.8683
Q9NVV4	Poly(A) RNA polymerase, mitochondrial (PAP) (EC 2.7.7.19) (PAP-associated domain-containing protein 1) (Polynucleotide adenylyltransferase) (Terminal uridylyltransferase 1) (TUTase 1) (mtPAP)	MTPAP	MITOCHONDRIA	unknown	84.0764
Q02338	D-beta-hydroxybutyrate dehydrogenase, mitochondrial (EC 1.1.1.30) (3-hydroxybutyrate dehydrogenase) (BDH) (Short chain dehydrogenase/reductase family 9C member 1)	BDH1	MITOCHONDRIA	unknown	81.5954
Q96C36	Pyrroline-5-carboxylate reductase 2 (P5C reductase 2) (P5CR 2) (EC 1.5.1.2)	PYCR2	MITOCHONDRIA	unknown	79.8094
Q96GC5	39S ribosomal protein L48, mitochondrial (L48mt) (MRP-L48) (Mitochondrial large ribosomal subunit protein mL48)	MRPL48	MITOCHONDRIA	unknown	78.9071
P12236	ADP/ATP translocase 3 (ADP,ATP carrier protein 3) (ADP,ATP carrier protein, isoform T2) (ANT 2) (Adenine nucleotide translocator 3) (ANT 3) (Solute carrier family 25 member 6) [Cleaved into: ADP/ATP translocase 3, N-terminally processed]	SLC25A6	MITOCHONDRIA	unknown	73.4408
Q8N983-4	39S ribosomal protein L43, mitochondrial (L43mt) (MRP-L43) (Mitochondrial large ribosomal subunit protein mL43) (Mitochondrial ribosomal protein bMRP36a)	MRPL43	MITOCHONDRIA	unknown	57.9161
Q9BQP7	Mitochondrial genome maintenance exonuclease 1 (EC 3.1.-.-)	MGME1	MITOCHONDRIA	unknown	54.5361
Q96CU9	FAD-dependent oxidoreductase domain-containing protein 1 (EC 1.-.-.-)	FOXRED1	MITOCHONDRIA	unknown	49.1585
P82673	28S ribosomal protein S35, mitochondrial (MRP-S35) (S35mt) (28S ribosomal protein S28, mitochondrial) (MRP-S28) (S28mt) (Mitochondrial small ribosomal subunit protein mS35)	MRPS35	MITOCHONDRIA	unknown	47.093
E9PEX6	Dihydrolipoyl dehydrogenase (EC 1.8.1.4)	DLD	MITOCHONDRIA	unknown	42.0371
Q9NV66	S-adenosyl-L-methionine-dependent tRNA 4-demethylwyosine synthase TYW1 (EC 4.1.3.44) (Radical S-adenosyl methionine and flavodoxin domain-containing protein 1) (tRNA wybutosine-synthesizing protein 1 homolog) (tRNA-yW-synthesizing protein)	TYW1	ER	unknown	93.5086
Q9NVQ4	Fas apoptotic inhibitory molecule 1	FAIM	CYTOSOL	unknown	48.4626
