# Supplementary material for: CFTR Rescue by Lumacaftor (VX-809) Induces an Extensive Reorganization of Mitochondria in the Cystic Fibrosis Bronchial Epithelium
Source: Cells. 2022 Jun 16;11(12):1938. doi: 10.3390/cells11121938 (PMC9222197; doi:10.3390/cells11121938)
Supplement: Supplementary file 1 [file cells-11-01938-s001.zip › Supplementary File_4.xlsx]

## Sheet: Biological Processes
#term ID	term description	observed gene count	background gene count	false discovery rate	matching proteins in your network (IDs)	matching proteins in your network (labels)
GO:0140053	mitochondrial gene expression	24	137	5.57e-17	ENSP00000081029,ENSP00000168216,ENSP00000177742,ENSP00000199706,ENSP00000244571,ENSP00000254928,ENSP00000258383,ENSP00000258455,ENSP00000260102,ENSP00000272418,ENSP00000296805,ENSP00000301585,ENSP00000305682,ENSP00000308275,ENSP00000308717,ENSP00000308897,ENSP00000313877,ENSP00000315017,ENSP00000323065,ENSP00000341082,ENSP00000358060,ENSP00000370508,ENSP00000420588,ENSP00000431040	AARS2,ERAL1,GADD45GIP1,GFM2,HSD17B10,ICT1,MRPL1,MRPL11,MRPL15,MRPL20,MRPL22,MRPL28,MRPL38,MRPL39,MRPL44,MRPL48,MRPS34,MRPS35,MRPS5,MRPS9,MTIF3,TARS2,TFAM,TSFM
GO:0032543	mitochondrial translation	22	110	9.39e-17	ENSP00000081029,ENSP00000177742,ENSP00000199706,ENSP00000244571,ENSP00000254928,ENSP00000258383,ENSP00000258455,ENSP00000260102,ENSP00000272418,ENSP00000296805,ENSP00000301585,ENSP00000305682,ENSP00000308275,ENSP00000308717,ENSP00000308897,ENSP00000313877,ENSP00000315017,ENSP00000323065,ENSP00000341082,ENSP00000358060,ENSP00000370508,ENSP00000431040	AARS2,ERAL1,GADD45GIP1,GFM2,ICT1,MRPL1,MRPL11,MRPL15,MRPL20,MRPL22,MRPL28,MRPL38,MRPL39,MRPL44,MRPL48,MRPS34,MRPS35,MRPS5,MRPS9,MTIF3,TARS2,TSFM
GO:0006414	translational elongation	21	116	2.73e-15	ENSP00000081029,ENSP00000177742,ENSP00000199706,ENSP00000254928,ENSP00000258383,ENSP00000258455,ENSP00000260102,ENSP00000272418,ENSP00000301585,ENSP00000305682,ENSP00000308275,ENSP00000308717,ENSP00000308897,ENSP00000313877,ENSP00000315017,ENSP00000323065,ENSP00000331901,ENSP00000341082,ENSP00000376056,ENSP00000410059,ENSP00000431040	EEF1B2,EEF1D,EEF1G,ERAL1,GADD45GIP1,ICT1,MRPL1,MRPL11,MRPL15,MRPL20,MRPL22,MRPL28,MRPL38,MRPL39,MRPL44,MRPL48,MRPS34,MRPS35,MRPS5,MRPS9,TSFM
GO:0045333	cellular respiration	22	153	2.48e-14	ENSP00000184266,ENSP00000205402,ENSP00000236980,ENSP00000252102,ENSP00000252711,ENSP00000263035,ENSP00000266544,ENSP00000268379,ENSP00000268668,ENSP00000276689,ENSP00000296684,ENSP00000299518,ENSP00000307786,ENSP00000308610,ENSP00000322450,ENSP00000327070,ENSP00000330737,ENSP00000335304,ENSP00000356972,ENSP00000367923,ENSP00000369134,ENSP00000370223	CYCS,DHTKD1,DLD,DLST,FASTKD2,GPD2,IDH3A,IDH3B,MDH2,NDUFA10,NDUFA12,NDUFA2,NDUFA9,NDUFB10,NDUFB4,NDUFB9,NDUFS2,NDUFS4,NDUFV1,PDHA1,SUCLA2,UQCRC2
GO:0070125	mitochondrial translational elongation	18	89	8.29e-14	ENSP00000081029,ENSP00000177742,ENSP00000199706,ENSP00000254928,ENSP00000258383,ENSP00000258455,ENSP00000260102,ENSP00000272418,ENSP00000301585,ENSP00000305682,ENSP00000308275,ENSP00000308717,ENSP00000308897,ENSP00000313877,ENSP00000315017,ENSP00000323065,ENSP00000341082,ENSP00000431040	ERAL1,GADD45GIP1,ICT1,MRPL1,MRPL11,MRPL15,MRPL20,MRPL22,MRPL28,MRPL38,MRPL39,MRPL44,MRPL48,MRPS34,MRPS35,MRPS5,MRPS9,TSFM
GO:0070126	mitochondrial translational termination	18	91	9.74e-14	ENSP00000081029,ENSP00000177742,ENSP00000199706,ENSP00000254928,ENSP00000258383,ENSP00000258455,ENSP00000260102,ENSP00000272418,ENSP00000296805,ENSP00000301585,ENSP00000305682,ENSP00000308275,ENSP00000308717,ENSP00000308897,ENSP00000315017,ENSP00000323065,ENSP00000341082,ENSP00000431040	ERAL1,GADD45GIP1,GFM2,ICT1,MRPL1,MRPL11,MRPL15,MRPL20,MRPL22,MRPL28,MRPL38,MRPL39,MRPL44,MRPL48,MRPS34,MRPS35,MRPS5,MRPS9
GO:0007005	mitochondrion organization	30	424	1.21e-12	ENSP00000168216,ENSP00000184266,ENSP00000215375,ENSP00000216034,ENSP00000244571,ENSP00000252102,ENSP00000252711,ENSP00000262375,ENSP00000262570,ENSP00000263578,ENSP00000266544,ENSP00000268379,ENSP00000268668,ENSP00000276689,ENSP00000281456,ENSP00000295079,ENSP00000296684,ENSP00000307786,ENSP00000312618,ENSP00000322450,ENSP00000330737,ENSP00000349142,ENSP00000356134,ENSP00000356972,ENSP00000363614…	AARS2,ACAD9,ATP5C1,ATP5D,ATP5J,C2orf47,CHCHD3,CYCS,DNAJA3,FOXRED1,HMGCL,HSD17B10,MGME1,NDUFA10,NDUFA12,NDUFA2,NDUFA9,NDUFB10,NDUFB4,NDUFB9,NDUFS2,NDUFS4,NDUFV1,SLC25A4,SLC25A6,TFAM,TFB1M,TIMM50,TOMM22,UQCRC2
GO:0006091	generation of precursor metabolites and energy	29	400	1.8e-12	ENSP00000184266,ENSP00000205402,ENSP00000215375,ENSP00000236980,ENSP00000252102,ENSP00000252711,ENSP00000263035,ENSP00000266544,ENSP00000268379,ENSP00000268668,ENSP00000276689,ENSP00000281456,ENSP00000296684,ENSP00000299518,ENSP00000307786,ENSP00000308610,ENSP00000322450,ENSP00000327070,ENSP00000330737,ENSP00000335304,ENSP00000349142,ENSP00000356972,ENSP00000363614,ENSP00000367923,ENSP00000369134…	ATP5C1,ATP5D,ATP5J,BDH1,COX6C,CYCS,DHTKD1,DLD,DLST,FASTKD2,GPD2,HMGCL,IDH3A,IDH3B,MDH2,NDUFA10,NDUFA12,NDUFA2,NDUFA9,NDUFB10,NDUFB4,NDUFB9,NDUFS2,NDUFS4,NDUFV1,PDHA1,SLC25A4,SUCLA2,UQCRC2
GO:0044237	cellular metabolic process	155	8797	2.21e-12	ENSP00000003084,ENSP00000040738,ENSP00000081029,ENSP00000168216,ENSP00000177742,ENSP00000181839,ENSP00000184266,ENSP00000199706,ENSP00000205194,ENSP00000205402,ENSP00000215375,ENSP00000220764,ENSP00000226578,ENSP00000230048,ENSP00000234420,ENSP00000236980,ENSP00000244537,ENSP00000244571,ENSP00000248958,ENSP00000250498,ENSP00000252102,ENSP00000252244,ENSP00000252711,ENSP00000253023,ENSP00000254810…	AARS2,ACAD11,ACAD9,ACBD5,ACOT13,ADCK4,ADNP,AK2,AK3,AK4,ALDH1L2,ALDH6A1,ATP5C1,ATP5D,ATP5J,ATP8B1,BAZ1B,BDH1,BOD1L1,CC2D1B,CDK13,CDS1,CERS2,CFTR,CHCHD3,CKMT1B,CNOT6L,COX6C,CPSF1,CTSV,CYCS,DAD1,DDX28,DECR1,DHTKD1,DLD,DLST,DMAP1,DNAJA3,DNAJB12,DPF2,DTYMK,EED,EEF1B2,EEF1D,EEF1G,ENSG00000086848,ERAL1,ERH,EXOSC7,FASTKD2,FIP1L1,FSTL1,FXN,GADD45GIP1,GATAD2A,GFM2,GPD2,H3F3B,HIST1H1E,HIST1H4F,HMGA1,HMGCL,H…
GO:0044281	small molecule metabolic process	59	1779	6.62e-12	ENSP00000003084,ENSP00000168216,ENSP00000184266,ENSP00000205402,ENSP00000215375,ENSP00000216780,ENSP00000220764,ENSP00000230048,ENSP00000244571,ENSP00000252102,ENSP00000252711,ENSP00000258494,ENSP00000263035,ENSP00000264990,ENSP00000266544,ENSP00000268379,ENSP00000268668,ENSP00000276689,ENSP00000295030,ENSP00000295887,ENSP00000296684,ENSP00000299518,ENSP00000300283,ENSP00000304802,ENSP00000307786…	AARS2,ACAD11,ACAD9,ACBD5,ACOT13,ADCK4,AK2,AK3,AK4,ALDH1L2,ALDH6A1,ATP5C1,ATP5D,ATP5J,ATP8B1,BDH1,CDS1,CFTR,CKMT1B,CYCS,DECR1,DHTKD1,DLD,DLST,DTYMK,ERH,FXN,GPD2,HMGCL,HSD17B10,IDH3A,IDH3B,MDH2,MTHFD2,NADK2,NDUFA10,NDUFA12,NDUFA2,NDUFA9,NDUFB10,NDUFB4,NDUFB9,NDUFS2,NDUFS4,NDUFV1,NPC2,NUDT19,OARD1,PCK2,PDHA1,PEX13,PNPLA8,PYCR1,PYCR2,RDH14,SLC25A17,SUCLA2,TARS2,UQCRC2
GO:0008152	metabolic process	161	9569	1.55e-11	ENSP00000003084,ENSP00000040738,ENSP00000081029,ENSP00000168216,ENSP00000177742,ENSP00000181839,ENSP00000184266,ENSP00000199706,ENSP00000205194,ENSP00000205402,ENSP00000215375,ENSP00000216780,ENSP00000220764,ENSP00000226578,ENSP00000228506,ENSP00000230048,ENSP00000234420,ENSP00000236980,ENSP00000244537,ENSP00000244571,ENSP00000248958,ENSP00000250498,ENSP00000252102,ENSP00000252244,ENSP00000252711…	AARS2,ACAD11,ACAD9,ACBD5,ACOT13,ADCK4,ADNP,AK2,AK3,AK4,ALDH1L2,ALDH6A1,ATP5C1,ATP5D,ATP5J,ATP8B1,BAZ1B,BDH1,BOD1L1,CC2D1B,CDK13,CDS1,CERS2,CFTR,CHCHD3,CKMT1B,CNOT6L,COX6C,CPSF1,CTSV,CYCS,DAD1,DBT,DDX28,DECR1,DHTKD1,DLD,DLST,DMAP1,DNAJA3,DNAJB12,DPF2,DTYMK,EED,EEF1B2,EEF1D,EEF1G,ENSG00000086848,ERAL1,ERH,EXOSC7,FASTKD2,FIP1L1,FOXRED1,FSTL1,FXN,GADD45GIP1,GATAD2A,GFM2,GPD2,H3F3B,HIST1H1E,HIST1H4F,H…
GO:0006119	oxidative phosphorylation	16	100	3.57e-11	ENSP00000184266,ENSP00000205402,ENSP00000215375,ENSP00000252102,ENSP00000252711,ENSP00000266544,ENSP00000268379,ENSP00000268668,ENSP00000276689,ENSP00000296684,ENSP00000307786,ENSP00000322450,ENSP00000330737,ENSP00000349142,ENSP00000356972,ENSP00000389649	ATP5C1,ATP5D,ATP5J,CYCS,DLD,NDUFA10,NDUFA12,NDUFA2,NDUFA9,NDUFB10,NDUFB4,NDUFB9,NDUFS2,NDUFS4,NDUFV1,UQCRC2
GO:0032984	protein-containing complex disassembly	21	220	5.47e-11	ENSP00000081029,ENSP00000177742,ENSP00000199706,ENSP00000254928,ENSP00000258383,ENSP00000258455,ENSP00000260102,ENSP00000272418,ENSP00000296805,ENSP00000301585,ENSP00000305682,ENSP00000308275,ENSP00000308717,ENSP00000308897,ENSP00000315017,ENSP00000323065,ENSP00000323967,ENSP00000341082,ENSP00000370508,ENSP00000399888,ENSP00000431040	ERAL1,GADD45GIP1,GFM2,HMGA1,ICT1,MRPL1,MRPL11,MRPL15,MRPL20,MRPL22,MRPL28,MRPL38,MRPL39,MRPL44,MRPL48,MRPS34,MRPS35,MRPS5,MRPS9,MTIF3,SMARCE1
GO:0055114	oxidation-reduction process	40	932	7.65e-11	ENSP00000168216,ENSP00000184266,ENSP00000205402,ENSP00000220764,ENSP00000236980,ENSP00000252102,ENSP00000252711,ENSP00000258494,ENSP00000263035,ENSP00000263578,ENSP00000264990,ENSP00000266544,ENSP00000268379,ENSP00000268668,ENSP00000276689,ENSP00000295030,ENSP00000296684,ENSP00000299518,ENSP00000307786,ENSP00000308610,ENSP00000312618,ENSP00000322450,ENSP00000327070,ENSP00000330737,ENSP00000335304…	ACAD11,ACAD9,ALDH1L2,ALDH6A1,BDH1,COX6C,CYCS,DECR1,DHTKD1,DLD,DLST,FASTKD2,FOXRED1,FXN,GPD2,HSD17B10,HSDL2,IDH3A,IDH3B,MDH2,MTHFD2,NDUFA10,NDUFA12,NDUFA2,NDUFA9,NDUFB10,NDUFB4,NDUFB9,NDUFS2,NDUFS4,NDUFV1,PDHA1,PEX13,PYCR1,PYCR2,RDH14,SLC25A17,SUCLA2,TYW1,UQCRC2
GO:0043933	protein-containing complex subunit organization	56	1770	1.48e-10	ENSP00000081029,ENSP00000168216,ENSP00000177742,ENSP00000184266,ENSP00000199706,ENSP00000220764,ENSP00000230048,ENSP00000236980,ENSP00000244537,ENSP00000244571,ENSP00000252102,ENSP00000252244,ENSP00000252711,ENSP00000254810,ENSP00000254928,ENSP00000257789,ENSP00000258383,ENSP00000258455,ENSP00000260102,ENSP00000263578,ENSP00000265148,ENSP00000266544,ENSP00000268668,ENSP00000269576,ENSP00000272418…	AARS2,ACAD9,ACOT13,CENPE,DDX28,DECR1,DNAJB12,ERAL1,FASTKD2,FOXRED1,GADD45GIP1,GFM2,GRB7,H3F3B,HIST1H1E,HIST1H4F,HIST2H2BE,HIST2H2BF,HMGA1,HMGCL,HSD17B10,ICT1,KRT1,KRT10,MRPL1,MRPL11,MRPL15,MRPL20,MRPL22,MRPL28,MRPL38,MRPL39,MRPL44,MRPL48,MRPS34,MRPS35,MRPS5,MRPS9,MTERF3,MTIF3,NDUFA10,NDUFA12,NDUFA2,NDUFA9,NDUFB10,NDUFB4,NDUFB9,NDUFS2,NDUFS4,NDUFV1,ORC3,PRKACA,RCC1,SMARCE1,STX4,TFAM
GO:0009117	nucleotide metabolic process	31	576	1.72e-10	ENSP00000184266,ENSP00000205402,ENSP00000215375,ENSP00000230048,ENSP00000252102,ENSP00000252711,ENSP00000263035,ENSP00000266544,ENSP00000268379,ENSP00000268668,ENSP00000276689,ENSP00000295887,ENSP00000296684,ENSP00000304802,ENSP00000307786,ENSP00000308610,ENSP00000322450,ENSP00000327070,ENSP00000330737,ENSP00000335304,ENSP00000346921,ENSP00000349142,ENSP00000356972,ENSP00000363614,ENSP00000367923…	ACOT13,AK2,AK3,AK4,ATP5C1,ATP5D,ATP5J,CDS1,CYCS,DHTKD1,DLD,DLST,DTYMK,ERH,GPD2,HMGCL,MDH2,NADK2,NDUFA10,NDUFA12,NDUFA2,NDUFA9,NDUFB10,NDUFB4,NDUFB9,NDUFS2,NDUFS4,NDUFV1,PDHA1,SUCLA2,UQCRC2
GO:0006412	translation	25	362	1.91e-10	ENSP00000081029,ENSP00000177742,ENSP00000199706,ENSP00000244571,ENSP00000254928,ENSP00000258383,ENSP00000258455,ENSP00000260102,ENSP00000272418,ENSP00000296805,ENSP00000301585,ENSP00000305682,ENSP00000308275,ENSP00000308717,ENSP00000308897,ENSP00000313877,ENSP00000315017,ENSP00000323065,ENSP00000331901,ENSP00000341082,ENSP00000358060,ENSP00000370508,ENSP00000376056,ENSP00000410059,ENSP00000431040	AARS2,EEF1B2,EEF1D,EEF1G,ERAL1,GADD45GIP1,GFM2,ICT1,MRPL1,MRPL11,MRPL15,MRPL20,MRPL22,MRPL28,MRPL38,MRPL39,MRPL44,MRPL48,MRPS34,MRPS35,MRPS5,MRPS9,MTIF3,TARS2,TSFM
GO:0017144	drug metabolic process	32	622	1.93e-10	ENSP00000184266,ENSP00000205402,ENSP00000215375,ENSP00000252102,ENSP00000252711,ENSP00000258494,ENSP00000263035,ENSP00000266544,ENSP00000268379,ENSP00000268668,ENSP00000276689,ENSP00000296684,ENSP00000299518,ENSP00000300283,ENSP00000307786,ENSP00000322450,ENSP00000327070,ENSP00000330737,ENSP00000335304,ENSP00000342502,ENSP00000349142,ENSP00000356972,ENSP00000363614,ENSP00000367923,ENSP00000369134…	AK3,AK4,ALDH1L2,ATP5C1,ATP5D,ATP5J,BDH1,CKMT1B,CYCS,DHTKD1,DLD,DLST,HMGCL,IDH3A,IDH3B,MDH2,MTHFD2,NDUFA10,NDUFA12,NDUFA2,NDUFA9,NDUFB10,NDUFB4,NDUFB9,NDUFS2,NDUFS4,NDUFV1,PDHA1,PYCR1,PYCR2,SUCLA2,UQCRC2
GO:0055086	nucleobase-containing small molecule metabolic process	33	662	1.93e-10	ENSP00000184266,ENSP00000205402,ENSP00000215375,ENSP00000230048,ENSP00000252102,ENSP00000252711,ENSP00000263035,ENSP00000266544,ENSP00000268379,ENSP00000268668,ENSP00000276689,ENSP00000295887,ENSP00000296684,ENSP00000304802,ENSP00000307786,ENSP00000308610,ENSP00000322450,ENSP00000327070,ENSP00000330737,ENSP00000335304,ENSP00000346921,ENSP00000349142,ENSP00000356972,ENSP00000363614,ENSP00000367923…	ACOT13,AK2,AK3,AK4,ALDH6A1,ATP5C1,ATP5D,ATP5J,CDS1,CYCS,DHTKD1,DLD,DLST,DTYMK,ERH,GPD2,HMGCL,MDH2,NADK2,NDUFA10,NDUFA12,NDUFA2,NDUFA9,NDUFB10,NDUFB4,NDUFB9,NDUFS2,NDUFS4,NDUFV1,OARD1,PDHA1,SUCLA2,UQCRC2
GO:1901566	organonitrogen compound biosynthetic process	48	1370	2.21e-10	ENSP00000081029,ENSP00000177742,ENSP00000199706,ENSP00000205402,ENSP00000215375,ENSP00000244571,ENSP00000248958,ENSP00000250498,ENSP00000254928,ENSP00000258383,ENSP00000258455,ENSP00000260102,ENSP00000263035,ENSP00000271688,ENSP00000272418,ENSP00000283415,ENSP00000295770,ENSP00000295887,ENSP00000296805,ENSP00000301585,ENSP00000304802,ENSP00000305682,ENSP00000308275,ENSP00000308717,ENSP00000308897…	AARS2,AK2,ATP5C1,ATP5D,ATP5J,CDS1,CERS2,DAD1,DHTKD1,DLD,DTYMK,EEF1B2,EEF1D,EEF1G,ENSG00000086848,ERAL1,ERH,FXN,GADD45GIP1,GFM2,IBA57,ICT1,LPCAT1,MRPL1,MRPL11,MRPL15,MRPL20,MRPL22,MRPL28,MRPL38,MRPL39,MRPL44,MRPL48,MRPS34,MRPS35,MRPS5,MRPS9,MTIF3,NADK2,PDHA1,PYCR1,PYCR2,SDF2L1,STT3B,SUCLA2,TARS2,TSFM,UBE2J1
GO:0071704	organic substance metabolic process	153	9135	3.04e-10	ENSP00000003084,ENSP00000040738,ENSP00000081029,ENSP00000168216,ENSP00000177742,ENSP00000181839,ENSP00000184266,ENSP00000199706,ENSP00000205194,ENSP00000205402,ENSP00000215375,ENSP00000216780,ENSP00000220764,ENSP00000226578,ENSP00000228506,ENSP00000230048,ENSP00000234420,ENSP00000236980,ENSP00000244537,ENSP00000244571,ENSP00000248958,ENSP00000250498,ENSP00000252102,ENSP00000252244,ENSP00000252711…	AARS2,ACAD11,ACAD9,ACBD5,ACOT13,ADCK4,ADNP,AK2,AK3,AK4,ALDH1L2,ALDH6A1,ATP5C1,ATP5D,ATP5J,ATP8B1,BAZ1B,BDH1,BOD1L1,CC2D1B,CDK13,CDS1,CERS2,CFTR,CHCHD3,CKMT1B,CNOT6L,CPSF1,CTSV,CYCS,DAD1,DDX28,DECR1,DHTKD1,DLD,DLST,DMAP1,DNAJA3,DNAJB12,DPF2,DTYMK,EED,EEF1B2,EEF1D,EEF1G,ENSG00000086848,ERAL1,ERH,EXOSC7,FASTKD2,FIP1L1,FSTL1,FXN,GADD45GIP1,GATAD2A,GFM2,GPD2,H3F3B,HIST1H1E,HIST1H4F,HMGA1,HMGCL,HNRNPDL…
GO:0043603	cellular amide metabolic process	34	732	4.61e-10	ENSP00000081029,ENSP00000177742,ENSP00000199706,ENSP00000205402,ENSP00000230048,ENSP00000244571,ENSP00000254928,ENSP00000258383,ENSP00000258455,ENSP00000258494,ENSP00000260102,ENSP00000271688,ENSP00000272418,ENSP00000296805,ENSP00000301585,ENSP00000305682,ENSP00000308275,ENSP00000308717,ENSP00000308897,ENSP00000313877,ENSP00000315017,ENSP00000323065,ENSP00000331901,ENSP00000335304,ENSP00000341082…	AARS2,ACOT13,ALDH1L2,CERS2,DLD,DLST,EEF1B2,EEF1D,EEF1G,ERAL1,GADD45GIP1,GFM2,HMGCL,ICT1,MRPL1,MRPL11,MRPL15,MRPL20,MRPL22,MRPL28,MRPL38,MRPL39,MRPL44,MRPL48,MRPS34,MRPS35,MRPS5,MRPS9,MTHFD2,MTIF3,PDHA1,SUCLA2,TARS2,TSFM
GO:0034641	cellular nitrogen compound metabolic process	105	5126	4.86e-10	ENSP00000040738,ENSP00000081029,ENSP00000168216,ENSP00000177742,ENSP00000181839,ENSP00000184266,ENSP00000199706,ENSP00000205194,ENSP00000205402,ENSP00000215375,ENSP00000230048,ENSP00000234420,ENSP00000244537,ENSP00000244571,ENSP00000252102,ENSP00000252711,ENSP00000254928,ENSP00000257181,ENSP00000257789,ENSP00000258383,ENSP00000258455,ENSP00000258494,ENSP00000260102,ENSP00000261708,ENSP00000262375…	AARS2,ACOT13,ADNP,AK2,AK3,AK4,ALDH1L2,ALDH6A1,ATP5C1,ATP5D,ATP5J,BAZ1B,BOD1L1,CC2D1B,CDK13,CDS1,CERS2,CHCHD3,CNOT6L,CPSF1,CYCS,DDX28,DHTKD1,DLD,DLST,DMAP1,DNAJA3,DPF2,DTYMK,EED,EEF1B2,EEF1D,EEF1G,ERAL1,ERH,EXOSC7,FIP1L1,FXN,GADD45GIP1,GATAD2A,GFM2,GPD2,HIST1H4F,HMGA1,HMGCL,HNRNPDL,HSD17B10,IBA57,ICT1,MDH2,MGME1,MRPL1,MRPL11,MRPL15,MRPL20,MRPL22,MRPL28,MRPL38,MRPL39,MRPL44,MRPL48,MRPS34,MRPS35,MRP…
GO:0043604	amide biosynthetic process	28	495	5.11e-10	ENSP00000081029,ENSP00000177742,ENSP00000199706,ENSP00000205402,ENSP00000244571,ENSP00000254928,ENSP00000258383,ENSP00000258455,ENSP00000260102,ENSP00000271688,ENSP00000272418,ENSP00000296805,ENSP00000301585,ENSP00000305682,ENSP00000308275,ENSP00000308717,ENSP00000308897,ENSP00000313877,ENSP00000315017,ENSP00000323065,ENSP00000331901,ENSP00000341082,ENSP00000358060,ENSP00000369134,ENSP00000370508…	AARS2,CERS2,DLD,EEF1B2,EEF1D,EEF1G,ERAL1,GADD45GIP1,GFM2,ICT1,MRPL1,MRPL11,MRPL15,MRPL20,MRPL22,MRPL28,MRPL38,MRPL39,MRPL44,MRPL48,MRPS34,MRPS35,MRPS5,MRPS9,MTIF3,PDHA1,TARS2,TSFM
GO:0009167	purine ribonucleoside monophosphate metabolic process	20	230	5.37e-10	ENSP00000184266,ENSP00000205402,ENSP00000215375,ENSP00000252102,ENSP00000252711,ENSP00000263035,ENSP00000266544,ENSP00000268379,ENSP00000268668,ENSP00000276689,ENSP00000296684,ENSP00000307786,ENSP00000322450,ENSP00000330737,ENSP00000346921,ENSP00000349142,ENSP00000356972,ENSP00000371230,ENSP00000378743,ENSP00000389649	AK2,AK3,AK4,ATP5C1,ATP5D,ATP5J,CYCS,DHTKD1,DLD,NDUFA10,NDUFA12,NDUFA2,NDUFA9,NDUFB10,NDUFB4,NDUFB9,NDUFS2,NDUFS4,NDUFV1,UQCRC2
GO:0009123	nucleoside monophosphate metabolic process	21	262	6.11e-10	ENSP00000184266,ENSP00000205402,ENSP00000215375,ENSP00000252102,ENSP00000252711,ENSP00000263035,ENSP00000266544,ENSP00000268379,ENSP00000268668,ENSP00000276689,ENSP00000296684,ENSP00000304802,ENSP00000307786,ENSP00000322450,ENSP00000330737,ENSP00000346921,ENSP00000349142,ENSP00000356972,ENSP00000371230,ENSP00000378743,ENSP00000389649	AK2,AK3,AK4,ATP5C1,ATP5D,ATP5J,CYCS,DHTKD1,DLD,DTYMK,NDUFA10,NDUFA12,NDUFA2,NDUFA9,NDUFB10,NDUFB4,NDUFB9,NDUFS2,NDUFS4,NDUFV1,UQCRC2
GO:0071840	cellular component organization or biogenesis	107	5342	8.67e-10	ENSP00000003084,ENSP00000081029,ENSP00000168216,ENSP00000177742,ENSP00000184266,ENSP00000199706,ENSP00000215375,ENSP00000216034,ENSP00000220764,ENSP00000230048,ENSP00000236980,ENSP00000243253,ENSP00000244537,ENSP00000244571,ENSP00000246662,ENSP00000252102,ENSP00000252244,ENSP00000252711,ENSP00000254810,ENSP00000254928,ENSP00000257789,ENSP00000258383,ENSP00000258455,ENSP00000260102,ENSP00000261708…	AARS2,ACAD9,ACOT13,ADNP,ATP5C1,ATP5D,ATP5J,ATP8B1,BAZ1B,C2orf47,CENPE,CFTR,CHCHD3,CTSV,CYCS,DDX28,DECR1,DMAP1,DNAJA3,DNAJB12,EED,ERAL1,EXOSC7,FASTKD2,FOXRED1,FXN,GADD45GIP1,GFM2,GRB7,GULP1,H2AFV,H3F3B,HIST1H1E,HIST1H4F,HIST2H2AC,HIST2H2BE,HIST2H2BF,HMGA1,HMGCL,HSD17B10,IBA57,ICT1,KRT1,KRT10,KRT16,KRT2,KRT6A,KRT9,LONP2,MAD2L1,MALSU1,MAP1S,MGME1,MRPL1,MRPL11,MRPL15,MRPL20,MRPL22,MRPL28,MRPL38,MRPL3…
GO:0044238	primary metabolic process	148	8808	9.35e-10	ENSP00000003084,ENSP00000040738,ENSP00000081029,ENSP00000168216,ENSP00000177742,ENSP00000181839,ENSP00000184266,ENSP00000199706,ENSP00000205194,ENSP00000205402,ENSP00000215375,ENSP00000216780,ENSP00000220764,ENSP00000226578,ENSP00000228506,ENSP00000230048,ENSP00000234420,ENSP00000236980,ENSP00000244537,ENSP00000244571,ENSP00000248958,ENSP00000250498,ENSP00000252102,ENSP00000252244,ENSP00000252711…	AARS2,ACAD11,ACAD9,ACBD5,ACOT13,ADNP,AK2,AK3,AK4,ALDH6A1,ATP5C1,ATP5D,ATP5J,ATP8B1,BAZ1B,BOD1L1,CC2D1B,CDK13,CDS1,CERS2,CFTR,CHCHD3,CKMT1B,CNOT6L,CPSF1,CTSV,CYCS,DAD1,DDX28,DECR1,DHTKD1,DLD,DLST,DMAP1,DNAJA3,DNAJB12,DPF2,DTYMK,EED,EEF1B2,EEF1D,EEF1G,ENSG00000086848,ERAL1,ERH,EXOSC7,FASTKD2,FIP1L1,FSTL1,FXN,GADD45GIP1,GATAD2A,GFM2,GPD2,H3F3B,HIST1H1E,HIST1H4F,HMGA1,HMGCL,HNRNPDL,HSD17B10,ICT1,IDH3…
GO:1901564	organonitrogen compound metabolic process	106	5281	9.94e-10	ENSP00000003084,ENSP00000081029,ENSP00000168216,ENSP00000177742,ENSP00000181839,ENSP00000184266,ENSP00000199706,ENSP00000205402,ENSP00000215375,ENSP00000226578,ENSP00000230048,ENSP00000236980,ENSP00000244537,ENSP00000244571,ENSP00000248958,ENSP00000250498,ENSP00000252102,ENSP00000252244,ENSP00000252711,ENSP00000253023,ENSP00000254810,ENSP00000254928,ENSP00000258383,ENSP00000258455,ENSP00000258494…	AARS2,ACOT13,AK2,AK3,AK4,ALDH1L2,ALDH6A1,ATP5C1,ATP5D,ATP5J,BAZ1B,CDK13,CDS1,CERS2,CFTR,CKMT1B,CTSV,CYCS,DAD1,DHTKD1,DLD,DLST,DMAP1,DNAJB12,DTYMK,EED,EEF1B2,EEF1D,EEF1G,ENSG00000086848,ERAL1,ERH,FASTKD2,FSTL1,FXN,GADD45GIP1,GFM2,GPD2,H3F3B,HIST1H1E,HIST1H4F,HMGCL,HSD17B10,IBA57,ICT1,KRT1,KRT10,KRT2,LONP2,LPCAT1,MAD2L1,MANBA,MDH2,MRPL1,MRPL11,MRPL15,MRPL20,MRPL22,MRPL28,MRPL38,MRPL39,MRPL44,MRPL48…
GO:0009141	nucleoside triphosphate metabolic process	20	246	1.35e-09	ENSP00000184266,ENSP00000205402,ENSP00000215375,ENSP00000252102,ENSP00000252711,ENSP00000263035,ENSP00000266544,ENSP00000268379,ENSP00000268668,ENSP00000276689,ENSP00000296684,ENSP00000304802,ENSP00000307786,ENSP00000322450,ENSP00000330737,ENSP00000349142,ENSP00000356972,ENSP00000371230,ENSP00000378743,ENSP00000389649	AK3,AK4,ATP5C1,ATP5D,ATP5J,CYCS,DHTKD1,DLD,DTYMK,NDUFA10,NDUFA12,NDUFA2,NDUFA9,NDUFB10,NDUFB4,NDUFB9,NDUFS2,NDUFS4,NDUFV1,UQCRC2
GO:0046034	ATP metabolic process	18	190	1.38e-09	ENSP00000184266,ENSP00000205402,ENSP00000215375,ENSP00000252102,ENSP00000252711,ENSP00000263035,ENSP00000266544,ENSP00000268379,ENSP00000268668,ENSP00000276689,ENSP00000296684,ENSP00000307786,ENSP00000322450,ENSP00000330737,ENSP00000349142,ENSP00000356972,ENSP00000378743,ENSP00000389649	AK4,ATP5C1,ATP5D,ATP5J,CYCS,DHTKD1,DLD,NDUFA10,NDUFA12,NDUFA2,NDUFA9,NDUFB10,NDUFB4,NDUFB9,NDUFS2,NDUFS4,NDUFV1,UQCRC2
GO:0009205	purine ribonucleoside triphosphate metabolic process	19	221	1.72e-09	ENSP00000184266,ENSP00000205402,ENSP00000215375,ENSP00000252102,ENSP00000252711,ENSP00000263035,ENSP00000266544,ENSP00000268379,ENSP00000268668,ENSP00000276689,ENSP00000296684,ENSP00000307786,ENSP00000322450,ENSP00000330737,ENSP00000349142,ENSP00000356972,ENSP00000371230,ENSP00000378743,ENSP00000389649	AK3,AK4,ATP5C1,ATP5D,ATP5J,CYCS,DHTKD1,DLD,NDUFA10,NDUFA12,NDUFA2,NDUFA9,NDUFB10,NDUFB4,NDUFB9,NDUFS2,NDUFS4,NDUFV1,UQCRC2
GO:0033108	mitochondrial respiratory chain complex assembly	14	98	1.78e-09	ENSP00000184266,ENSP00000244571,ENSP00000252102,ENSP00000252711,ENSP00000263578,ENSP00000266544,ENSP00000268668,ENSP00000276689,ENSP00000296684,ENSP00000312618,ENSP00000322450,ENSP00000330737,ENSP00000356972,ENSP00000420588	AARS2,ACAD9,FOXRED1,NDUFA10,NDUFA12,NDUFA2,NDUFA9,NDUFB10,NDUFB4,NDUFB9,NDUFS2,NDUFS4,NDUFV1,TFAM
GO:0006996	organelle organization	75	3131	2.34e-09	ENSP00000168216,ENSP00000184266,ENSP00000215375,ENSP00000216034,ENSP00000236980,ENSP00000243253,ENSP00000244537,ENSP00000244571,ENSP00000246662,ENSP00000252102,ENSP00000252711,ENSP00000254810,ENSP00000254928,ENSP00000262291,ENSP00000262375,ENSP00000262570,ENSP00000263360,ENSP00000263578,ENSP00000265148,ENSP00000266544,ENSP00000268379,ENSP00000268668,ENSP00000276689,ENSP00000277541,ENSP00000281456…	AARS2,ACAD9,ATP5C1,ATP5D,ATP5J,ATP8B1,BAZ1B,C2orf47,CENPE,CHCHD3,CYCS,DDX28,DMAP1,DNAJA3,EED,ERAL1,FASTKD2,FOXRED1,GFM2,GRB7,H2AFV,H3F3B,HIST1H1E,HIST1H4F,HIST2H2AC,HIST2H2BE,HIST2H2BF,HMGA1,HMGCL,HSD17B10,KRT16,KRT2,KRT6A,KRT9,LONP2,MAD2L1,MAP1S,MGME1,MRPL11,MRPL20,MTERF3,MTIF3,NDUFA10,NDUFA12,NDUFA2,NDUFA9,NDUFB10,NDUFB4,NDUFB9,NDUFS2,NDUFS4,NDUFV1,NOTCH1,NUDT19,PEX13,PRKACA,RCC1,RFC1,RYBP,SEC6…
GO:0009150	purine ribonucleotide metabolic process	25	425	2.41e-09	ENSP00000184266,ENSP00000205402,ENSP00000215375,ENSP00000230048,ENSP00000252102,ENSP00000252711,ENSP00000263035,ENSP00000266544,ENSP00000268379,ENSP00000268668,ENSP00000276689,ENSP00000296684,ENSP00000307786,ENSP00000322450,ENSP00000330737,ENSP00000335304,ENSP00000346921,ENSP00000349142,ENSP00000356972,ENSP00000363614,ENSP00000367923,ENSP00000369134,ENSP00000371230,ENSP00000378743,ENSP00000389649	ACOT13,AK2,AK3,AK4,ATP5C1,ATP5D,ATP5J,CYCS,DHTKD1,DLD,DLST,HMGCL,NDUFA10,NDUFA12,NDUFA2,NDUFA9,NDUFB10,NDUFB4,NDUFB9,NDUFS2,NDUFS4,NDUFV1,PDHA1,SUCLA2,UQCRC2
GO:0032981	mitochondrial respiratory chain complex I assembly	12	65	3.09e-09	ENSP00000184266,ENSP00000252102,ENSP00000252711,ENSP00000263578,ENSP00000266544,ENSP00000268668,ENSP00000276689,ENSP00000296684,ENSP00000312618,ENSP00000322450,ENSP00000330737,ENSP00000356972	ACAD9,FOXRED1,NDUFA10,NDUFA12,NDUFA2,NDUFA9,NDUFB10,NDUFB4,NDUFB9,NDUFS2,NDUFS4,NDUFV1
GO:0072521	purine-containing compound metabolic process	26	478	4.34e-09	ENSP00000184266,ENSP00000205402,ENSP00000215375,ENSP00000230048,ENSP00000252102,ENSP00000252711,ENSP00000263035,ENSP00000266544,ENSP00000268379,ENSP00000268668,ENSP00000276689,ENSP00000296684,ENSP00000307786,ENSP00000322450,ENSP00000330737,ENSP00000335304,ENSP00000346921,ENSP00000349142,ENSP00000356972,ENSP00000363614,ENSP00000367923,ENSP00000369134,ENSP00000371230,ENSP00000378743,ENSP00000389649…	ACOT13,AK2,AK3,AK4,ATP5C1,ATP5D,ATP5J,CYCS,DHTKD1,DLD,DLST,HMGCL,NDUFA10,NDUFA12,NDUFA2,NDUFA9,NDUFB10,NDUFB4,NDUFB9,NDUFS2,NDUFS4,NDUFV1,OARD1,PDHA1,SUCLA2,UQCRC2
GO:0016043	cellular component organization	102	5163	6.69e-09	ENSP00000003084,ENSP00000081029,ENSP00000168216,ENSP00000177742,ENSP00000184266,ENSP00000199706,ENSP00000215375,ENSP00000216034,ENSP00000220764,ENSP00000230048,ENSP00000236980,ENSP00000243253,ENSP00000244537,ENSP00000244571,ENSP00000246662,ENSP00000252102,ENSP00000252244,ENSP00000252711,ENSP00000254810,ENSP00000254928,ENSP00000257789,ENSP00000258383,ENSP00000258455,ENSP00000260102,ENSP00000262291…	AARS2,ACAD9,ACOT13,ADNP,ATP5C1,ATP5D,ATP5J,ATP8B1,BAZ1B,C2orf47,CENPE,CFTR,CHCHD3,CTSV,CYCS,DDX28,DECR1,DMAP1,DNAJA3,DNAJB12,EED,ERAL1,FASTKD2,FOXRED1,FXN,GADD45GIP1,GFM2,GRB7,GULP1,H2AFV,H3F3B,HIST1H1E,HIST1H4F,HIST2H2AC,HIST2H2BE,HIST2H2BF,HMGA1,HMGCL,HSD17B10,IBA57,ICT1,KRT1,KRT10,KRT16,KRT2,KRT6A,KRT9,LONP2,MAD2L1,MAP1S,MGME1,MRPL1,MRPL11,MRPL15,MRPL20,MRPL22,MRPL28,MRPL38,MRPL39,MRPL44,MRPL4…
GO:0022904	respiratory electron transport chain	13	96	1.31e-08	ENSP00000184266,ENSP00000205402,ENSP00000252102,ENSP00000252711,ENSP00000266544,ENSP00000268668,ENSP00000276689,ENSP00000296684,ENSP00000307786,ENSP00000308610,ENSP00000322450,ENSP00000330737,ENSP00000356972	CYCS,DLD,GPD2,NDUFA10,NDUFA12,NDUFA2,NDUFA9,NDUFB10,NDUFB4,NDUFB9,NDUFS2,NDUFS4,NDUFV1
GO:0042775	mitochondrial ATP synthesis coupled electron transport	12	78	1.72e-08	ENSP00000184266,ENSP00000205402,ENSP00000252102,ENSP00000252711,ENSP00000266544,ENSP00000268668,ENSP00000276689,ENSP00000296684,ENSP00000307786,ENSP00000322450,ENSP00000330737,ENSP00000356972	CYCS,DLD,NDUFA10,NDUFA12,NDUFA2,NDUFA9,NDUFB10,NDUFB4,NDUFB9,NDUFS2,NDUFS4,NDUFV1
GO:0006120	mitochondrial electron transport, NADH to ubiquinone	10	44	1.87e-08	ENSP00000184266,ENSP00000205402,ENSP00000252102,ENSP00000252711,ENSP00000266544,ENSP00000268668,ENSP00000276689,ENSP00000296684,ENSP00000322450,ENSP00000356972	DLD,NDUFA10,NDUFA2,NDUFA9,NDUFB10,NDUFB4,NDUFB9,NDUFS2,NDUFS4,NDUFV1
GO:0022411	cellular component disassembly	22	364	1.87e-08	ENSP00000081029,ENSP00000177742,ENSP00000199706,ENSP00000254928,ENSP00000258383,ENSP00000258455,ENSP00000260102,ENSP00000272418,ENSP00000296805,ENSP00000301585,ENSP00000305682,ENSP00000308275,ENSP00000308717,ENSP00000308897,ENSP00000315017,ENSP00000323065,ENSP00000323967,ENSP00000341082,ENSP00000370508,ENSP00000399888,ENSP00000431040,ENSP00000445052	CTSV,ERAL1,GADD45GIP1,GFM2,HMGA1,ICT1,MRPL1,MRPL11,MRPL15,MRPL20,MRPL22,MRPL28,MRPL38,MRPL39,MRPL44,MRPL48,MRPS34,MRPS35,MRPS5,MRPS9,MTIF3,SMARCE1
GO:0006807	nitrogen compound metabolic process	138	8349	4.51e-08	ENSP00000003084,ENSP00000040738,ENSP00000081029,ENSP00000168216,ENSP00000177742,ENSP00000181839,ENSP00000184266,ENSP00000199706,ENSP00000205194,ENSP00000205402,ENSP00000215375,ENSP00000226578,ENSP00000230048,ENSP00000234420,ENSP00000236980,ENSP00000244537,ENSP00000244571,ENSP00000248958,ENSP00000250498,ENSP00000252102,ENSP00000252244,ENSP00000252711,ENSP00000253023,ENSP00000254810,ENSP00000254928…	AARS2,ACOT13,ADNP,AK2,AK3,AK4,ALDH1L2,ALDH6A1,ATP5C1,ATP5D,ATP5J,BAZ1B,BOD1L1,CC2D1B,CDK13,CDS1,CERS2,CFTR,CHCHD3,CKMT1B,CNOT6L,CPSF1,CTSV,CYCS,DAD1,DDX28,DHTKD1,DLD,DLST,DMAP1,DNAJA3,DNAJB12,DPF2,DTYMK,EED,EEF1B2,EEF1D,EEF1G,ENSG00000086848,ERAL1,ERH,EXOSC7,FASTKD2,FIP1L1,FSTL1,FXN,GADD45GIP1,GATAD2A,GFM2,GPD2,H3F3B,HIST1H1E,HIST1H4F,HMGA1,HMGCL,HNRNPDL,HSD17B10,IBA57,ICT1,KRT1,KRT10,KRT2,LONP2,…
GO:0022900	electron transport chain	15	169	1.04e-07	ENSP00000184266,ENSP00000205402,ENSP00000252102,ENSP00000252711,ENSP00000266544,ENSP00000268668,ENSP00000276689,ENSP00000296684,ENSP00000307786,ENSP00000308610,ENSP00000322450,ENSP00000330737,ENSP00000356972,ENSP00000370223,ENSP00000428895	COX6C,CYCS,DLD,GPD2,IDH3B,NDUFA10,NDUFA12,NDUFA2,NDUFA9,NDUFB10,NDUFB4,NDUFB9,NDUFS2,NDUFS4,NDUFV1
GO:0009058	biosynthetic process	92	4714	1.95e-07	ENSP00000003084,ENSP00000040738,ENSP00000081029,ENSP00000177742,ENSP00000181839,ENSP00000199706,ENSP00000205194,ENSP00000205402,ENSP00000215375,ENSP00000216780,ENSP00000244537,ENSP00000244571,ENSP00000248958,ENSP00000250498,ENSP00000254928,ENSP00000257789,ENSP00000258383,ENSP00000258455,ENSP00000258494,ENSP00000260102,ENSP00000262375,ENSP00000262570,ENSP00000263035,ENSP00000263063,ENSP00000263360…	AARS2,ADCK4,ADNP,AK2,AK4,ALDH1L2,ATP5C1,ATP5D,ATP5J,BAZ1B,BDH1,BOD1L1,CC2D1B,CDK13,CDS1,CERS2,CFTR,CHCHD3,CNOT6L,CPSF1,DAD1,DHTKD1,DLD,DMAP1,DNAJA3,DPF2,DTYMK,EED,EEF1B2,EEF1D,EEF1G,ENSG00000086848,ERAL1,ERH,FIP1L1,FXN,GADD45GIP1,GATAD2A,GFM2,GPD2,HIST1H4F,HMGA1,HMGCL,HNRNPDL,IBA57,ICT1,LPCAT1,MDH2,MGME1,MRPL1,MRPL11,MRPL15,MRPL20,MRPL22,MRPL28,MRPL38,MRPL39,MRPL44,MRPL48,MRPS34,MRPS35,MRPS5,MRPS…
GO:0019637	organophosphate metabolic process	35	1011	1.95e-07	ENSP00000184266,ENSP00000205402,ENSP00000215375,ENSP00000230048,ENSP00000252102,ENSP00000252711,ENSP00000263035,ENSP00000266544,ENSP00000268379,ENSP00000268668,ENSP00000276689,ENSP00000283415,ENSP00000295887,ENSP00000296003,ENSP00000296684,ENSP00000304802,ENSP00000307786,ENSP00000308610,ENSP00000322450,ENSP00000327070,ENSP00000330737,ENSP00000335304,ENSP00000346921,ENSP00000349142,ENSP00000356972…	ACOT13,AK2,AK3,AK4,ATP5C1,ATP5D,ATP5J,CDS1,CYCS,DHTKD1,DLD,DLST,DTYMK,ERH,GPD2,HMGCL,LPCAT1,MDH2,MTMR1,MTMR14,NADK2,NDUFA10,NDUFA12,NDUFA2,NDUFA9,NDUFB10,NDUFB4,NDUFB9,NDUFS2,NDUFS4,NDUFV1,PDHA1,PNPLA8,SUCLA2,UQCRC2
GO:1901576	organic substance biosynthetic process	91	4656	2.29e-07	ENSP00000003084,ENSP00000040738,ENSP00000081029,ENSP00000177742,ENSP00000181839,ENSP00000199706,ENSP00000205194,ENSP00000205402,ENSP00000215375,ENSP00000216780,ENSP00000244537,ENSP00000244571,ENSP00000248958,ENSP00000250498,ENSP00000254928,ENSP00000257789,ENSP00000258383,ENSP00000258455,ENSP00000260102,ENSP00000262375,ENSP00000262570,ENSP00000263035,ENSP00000263063,ENSP00000263360,ENSP00000266544…	AARS2,ADCK4,ADNP,AK2,AK4,ATP5C1,ATP5D,ATP5J,BAZ1B,BDH1,BOD1L1,CC2D1B,CDK13,CDS1,CERS2,CFTR,CHCHD3,CNOT6L,CPSF1,DAD1,DHTKD1,DLD,DMAP1,DNAJA3,DPF2,DTYMK,EED,EEF1B2,EEF1D,EEF1G,ENSG00000086848,ERAL1,ERH,FIP1L1,FXN,GADD45GIP1,GATAD2A,GFM2,GPD2,HIST1H4F,HMGA1,HMGCL,HNRNPDL,IBA57,ICT1,LPCAT1,MDH2,MGME1,MRPL1,MRPL11,MRPL15,MRPL20,MRPL22,MRPL28,MRPL38,MRPL39,MRPL44,MRPL48,MRPS34,MRPS35,MRPS5,MRPS9,MTERF3…
GO:1901135	carbohydrate derivative metabolic process	36	1083	3.06e-07	ENSP00000184266,ENSP00000205402,ENSP00000215375,ENSP00000230048,ENSP00000248958,ENSP00000250498,ENSP00000252102,ENSP00000252711,ENSP00000263035,ENSP00000266544,ENSP00000268379,ENSP00000268668,ENSP00000276689,ENSP00000295770,ENSP00000296684,ENSP00000304802,ENSP00000307786,ENSP00000308610,ENSP00000314606,ENSP00000322450,ENSP00000330737,ENSP00000335304,ENSP00000337053,ENSP00000346921,ENSP00000349142…	ACOT13,AK2,AK3,AK4,ATP5C1,ATP5D,ATP5J,CYCS,DAD1,DHTKD1,DLD,DLST,DTYMK,ENSG00000086848,ERH,GPD2,HMGCL,NDUFA10,NDUFA12,NDUFA2,NDUFA9,NDUFB10,NDUFB4,NDUFB9,NDUFS2,NDUFS4,NDUFV1,OARD1,PDHA1,SDF2L1,SEL1L,SGSH,STT3B,SUCLA2,UBE2J1,UQCRC2
GO:0034622	cellular protein-containing complex assembly	30	832	1.15e-06	ENSP00000184266,ENSP00000236980,ENSP00000244537,ENSP00000244571,ENSP00000252102,ENSP00000252711,ENSP00000254810,ENSP00000254928,ENSP00000257789,ENSP00000263578,ENSP00000265148,ENSP00000266544,ENSP00000268668,ENSP00000276689,ENSP00000287025,ENSP00000296684,ENSP00000307705,ENSP00000308897,ENSP00000312618,ENSP00000317714,ENSP00000322450,ENSP00000330737,ENSP00000332340,ENSP00000341082,ENSP00000345575…	AARS2,ACAD9,CENPE,DDX28,DNAJB12,ERAL1,FASTKD2,FOXRED1,GRB7,H3F3B,HIST1H1E,HIST1H4F,HIST2H2BE,HIST2H2BF,MRPL11,MRPL20,MTERF3,NDUFA10,NDUFA12,NDUFA2,NDUFA9,NDUFB10,NDUFB4,NDUFB9,NDUFS2,NDUFS4,NDUFV1,ORC3,STX4,TFAM
GO:0044249	cellular biosynthetic process	87	4567	2.15e-06	ENSP00000040738,ENSP00000081029,ENSP00000177742,ENSP00000181839,ENSP00000199706,ENSP00000205194,ENSP00000205402,ENSP00000215375,ENSP00000244537,ENSP00000244571,ENSP00000248958,ENSP00000250498,ENSP00000254928,ENSP00000257789,ENSP00000258383,ENSP00000258455,ENSP00000260102,ENSP00000262375,ENSP00000262570,ENSP00000263035,ENSP00000263063,ENSP00000263360,ENSP00000266544,ENSP00000271688,ENSP00000272418…	AARS2,ADCK4,ADNP,AK2,AK4,ATP5C1,ATP5D,ATP5J,BAZ1B,BDH1,BOD1L1,CC2D1B,CDK13,CDS1,CERS2,CHCHD3,CNOT6L,CPSF1,DAD1,DHTKD1,DLD,DMAP1,DNAJA3,DPF2,DTYMK,EED,EEF1B2,EEF1D,EEF1G,ENSG00000086848,ERAL1,ERH,FIP1L1,FXN,GADD45GIP1,GATAD2A,GFM2,HIST1H4F,HMGA1,HMGCL,HNRNPDL,IBA57,ICT1,LPCAT1,MGME1,MRPL1,MRPL11,MRPL15,MRPL20,MRPL22,MRPL28,MRPL38,MRPL39,MRPL44,MRPL48,MRPS34,MRPS35,MRPS5,MRPS9,MTERF3,MTIF3,MTMR1,MT…
GO:0006099	tricarboxylic acid cycle	7	32	9.27e-06	ENSP00000263035,ENSP00000299518,ENSP00000327070,ENSP00000335304,ENSP00000367923,ENSP00000369134,ENSP00000370223	DHTKD1,DLST,IDH3A,IDH3B,MDH2,PDHA1,SUCLA2
GO:0046483	heterocycle metabolic process	87	4716	9.35e-06	ENSP00000040738,ENSP00000168216,ENSP00000181839,ENSP00000184266,ENSP00000205194,ENSP00000205402,ENSP00000215375,ENSP00000230048,ENSP00000234420,ENSP00000244537,ENSP00000244571,ENSP00000252102,ENSP00000252711,ENSP00000257181,ENSP00000257789,ENSP00000258383,ENSP00000258455,ENSP00000258494,ENSP00000261708,ENSP00000262375,ENSP00000262570,ENSP00000263035,ENSP00000263063,ENSP00000263360,ENSP00000265564…	AARS2,ACOT13,ADNP,AK2,AK3,AK4,ALDH1L2,ALDH6A1,ATP5C1,ATP5D,ATP5J,BAZ1B,BOD1L1,CC2D1B,CDK13,CDS1,CHCHD3,CNOT6L,CPSF1,CYCS,DDX28,DHTKD1,DLD,DLST,DMAP1,DNAJA3,DPF2,DTYMK,EED,EEF1D,ERH,EXOSC7,FIP1L1,FXN,GATAD2A,GPD2,HIST1H4F,HMGA1,HMGCL,HNRNPDL,HSD17B10,IBA57,MDH2,MGME1,MRPL1,MRPL44,MRPS9,MSH6,MTERF3,MTHFD2,MTPAP,NADK2,NAT14,NCOA5,NDUFA10,NDUFA12,NDUFA2,NDUFA9,NDUFB10,NDUFB4,NDUFB9,NDUFS2,NDUFS4,NDUF…
GO:0009060	aerobic respiration	9	71	1.05e-05	ENSP00000263035,ENSP00000268379,ENSP00000299518,ENSP00000307786,ENSP00000327070,ENSP00000335304,ENSP00000367923,ENSP00000369134,ENSP00000370223	CYCS,DHTKD1,DLST,IDH3A,IDH3B,MDH2,PDHA1,SUCLA2,UQCRC2
GO:1901360	organic cyclic compound metabolic process	90	4963	1.05e-05	ENSP00000003084,ENSP00000040738,ENSP00000168216,ENSP00000181839,ENSP00000184266,ENSP00000205194,ENSP00000205402,ENSP00000215375,ENSP00000230048,ENSP00000234420,ENSP00000244537,ENSP00000244571,ENSP00000252102,ENSP00000252711,ENSP00000257181,ENSP00000257789,ENSP00000258383,ENSP00000258455,ENSP00000258494,ENSP00000261708,ENSP00000262375,ENSP00000262570,ENSP00000263035,ENSP00000263063,ENSP00000263360…	AARS2,ACOT13,ADNP,AK2,AK3,AK4,ALDH1L2,ALDH6A1,ATP5C1,ATP5D,ATP5J,ATP8B1,BAZ1B,BOD1L1,CC2D1B,CDK13,CDS1,CFTR,CHCHD3,CNOT6L,CPSF1,CYCS,DDX28,DHTKD1,DLD,DLST,DMAP1,DNAJA3,DPF2,DTYMK,EED,EEF1D,ERH,EXOSC7,FIP1L1,FXN,GATAD2A,GPD2,HIST1H4F,HMGA1,HMGCL,HNRNPDL,HSD17B10,IBA57,MDH2,MGME1,MRPL1,MRPL44,MRPS9,MSH6,MTERF3,MTHFD2,MTPAP,NADK2,NAT14,NCOA5,NDUFA10,NDUFA12,NDUFA2,NDUFA9,NDUFB10,NDUFB4,NDUFB9,NDUFS2…
GO:0006101	citrate metabolic process	7	36	1.76e-05	ENSP00000263035,ENSP00000299518,ENSP00000327070,ENSP00000335304,ENSP00000367923,ENSP00000369134,ENSP00000370223	DHTKD1,DLST,IDH3A,IDH3B,MDH2,PDHA1,SUCLA2
GO:0065003	protein-containing complex assembly	39	1514	4.11e-05	ENSP00000168216,ENSP00000184266,ENSP00000220764,ENSP00000230048,ENSP00000236980,ENSP00000244537,ENSP00000244571,ENSP00000252102,ENSP00000252244,ENSP00000252711,ENSP00000254810,ENSP00000254928,ENSP00000257789,ENSP00000263578,ENSP00000265148,ENSP00000266544,ENSP00000268668,ENSP00000269576,ENSP00000276689,ENSP00000287025,ENSP00000296684,ENSP00000307705,ENSP00000308897,ENSP00000309591,ENSP00000312618…	AARS2,ACAD9,ACOT13,CENPE,DDX28,DECR1,DNAJB12,ERAL1,FASTKD2,FOXRED1,GRB7,H3F3B,HIST1H1E,HIST1H4F,HIST2H2BE,HIST2H2BF,HMGA1,HMGCL,HSD17B10,KRT1,KRT10,MRPL11,MRPL20,MTERF3,NDUFA10,NDUFA12,NDUFA2,NDUFA9,NDUFB10,NDUFB4,NDUFB9,NDUFS2,NDUFS4,NDUFV1,ORC3,PRKACA,RCC1,STX4,TFAM
GO:0006725	cellular aromatic compound metabolic process	85	4754	5.2e-05	ENSP00000040738,ENSP00000168216,ENSP00000181839,ENSP00000184266,ENSP00000205194,ENSP00000205402,ENSP00000215375,ENSP00000230048,ENSP00000234420,ENSP00000244537,ENSP00000244571,ENSP00000252102,ENSP00000252711,ENSP00000257181,ENSP00000257789,ENSP00000258383,ENSP00000258455,ENSP00000258494,ENSP00000261708,ENSP00000262375,ENSP00000262570,ENSP00000263035,ENSP00000263063,ENSP00000263360,ENSP00000265564…	AARS2,ACOT13,ADNP,AK2,AK3,AK4,ALDH1L2,ALDH6A1,ATP5C1,ATP5D,ATP5J,BAZ1B,BOD1L1,CC2D1B,CDK13,CDS1,CHCHD3,CNOT6L,CPSF1,CYCS,DDX28,DHTKD1,DLD,DLST,DMAP1,DNAJA3,DPF2,DTYMK,EED,EEF1D,ERH,EXOSC7,FIP1L1,FXN,GATAD2A,GPD2,HIST1H4F,HMGA1,HMGCL,HNRNPDL,HSD17B10,IBA57,MDH2,MGME1,MRPL1,MRPL44,MRPS9,MSH6,MTERF3,MTHFD2,MTPAP,NADK2,NAT14,NCOA5,NDUFA10,NDUFA12,NDUFA2,NDUFA9,NDUFB10,NDUFB4,NDUFB9,NDUFS2,NDUFS4,NDUF…
GO:0019752	carboxylic acid metabolic process	27	854	6.33e-05	ENSP00000168216,ENSP00000205402,ENSP00000220764,ENSP00000244571,ENSP00000258494,ENSP00000263035,ENSP00000264990,ENSP00000295030,ENSP00000299518,ENSP00000300283,ENSP00000312618,ENSP00000327070,ENSP00000335304,ENSP00000342502,ENSP00000358060,ENSP00000363614,ENSP00000367923,ENSP00000369134,ENSP00000370223,ENSP00000377617,ENSP00000379568,ENSP00000380251,ENSP00000384949,ENSP00000390722,ENSP00000410804…	AARS2,ACAD11,ACAD9,ACBD5,ALDH1L2,ALDH6A1,ATP8B1,CKMT1B,DECR1,DHTKD1,DLD,DLST,HMGCL,HSD17B10,IDH3A,IDH3B,MDH2,MTHFD2,NUDT19,PDHA1,PEX13,PNPLA8,PYCR1,PYCR2,SLC25A17,SUCLA2,TARS2
GO:0044271	cellular nitrogen compound biosynthetic process	68	3528	8.38e-05	ENSP00000081029,ENSP00000177742,ENSP00000181839,ENSP00000199706,ENSP00000205194,ENSP00000205402,ENSP00000215375,ENSP00000244537,ENSP00000244571,ENSP00000254928,ENSP00000258383,ENSP00000258455,ENSP00000260102,ENSP00000262570,ENSP00000263035,ENSP00000263063,ENSP00000263360,ENSP00000271688,ENSP00000272418,ENSP00000277541,ENSP00000287025,ENSP00000290231,ENSP00000295887,ENSP00000296805,ENSP00000298532…	AARS2,ADNP,AK2,AK4,ATP5C1,ATP5D,ATP5J,BAZ1B,CC2D1B,CDK13,CDS1,CERS2,CHCHD3,CNOT6L,CPSF1,DHTKD1,DLD,DMAP1,DPF2,DTYMK,EED,EEF1B2,EEF1D,EEF1G,ERAL1,ERH,FIP1L1,FXN,GADD45GIP1,GATAD2A,GFM2,HIST1H4F,HMGA1,HNRNPDL,IBA57,ICT1,MRPL1,MRPL11,MRPL15,MRPL20,MRPL22,MRPL28,MRPL38,MRPL39,MRPL44,MRPL48,MRPS34,MRPS35,MRPS5,MRPS9,MTERF3,MTIF3,MTPAP,NADK2,NAT14,NCOA5,NKRF,NOTCH1,PDHA1,RFC1,RYBP,SNAPC4,SUCLA2,SUZ12,T…
GO:0006839	mitochondrial transport	13	223	9.08e-05	ENSP00000215375,ENSP00000216034,ENSP00000228318,ENSP00000268379,ENSP00000281456,ENSP00000295079,ENSP00000322020,ENSP00000349142,ENSP00000370808,ENSP00000389649,ENSP00000390722,ENSP00000445806,ENSP00000457733	ATP5C1,ATP5D,ATP5J,C2orf47,SLC25A17,SLC25A22,SLC25A24,SLC25A3,SLC25A4,SLC25A6,TIMM50,TOMM22,UQCRC2
GO:0006139	nucleobase-containing compound metabolic process	81	4551	0.00013	ENSP00000040738,ENSP00000168216,ENSP00000181839,ENSP00000184266,ENSP00000205194,ENSP00000205402,ENSP00000215375,ENSP00000230048,ENSP00000234420,ENSP00000244537,ENSP00000244571,ENSP00000252102,ENSP00000252711,ENSP00000257181,ENSP00000257789,ENSP00000258383,ENSP00000258455,ENSP00000261708,ENSP00000262375,ENSP00000262570,ENSP00000263035,ENSP00000263063,ENSP00000263360,ENSP00000265564,ENSP00000266544…	AARS2,ACOT13,ADNP,AK2,AK3,AK4,ALDH6A1,ATP5C1,ATP5D,ATP5J,BAZ1B,BOD1L1,CC2D1B,CDK13,CDS1,CHCHD3,CNOT6L,CPSF1,CYCS,DDX28,DHTKD1,DLD,DLST,DMAP1,DNAJA3,DPF2,DTYMK,EED,EEF1D,ERH,EXOSC7,FIP1L1,GATAD2A,GPD2,HIST1H4F,HMGA1,HMGCL,HNRNPDL,HSD17B10,MDH2,MGME1,MRPL1,MRPL44,MRPS9,MSH6,MTERF3,MTPAP,NADK2,NAT14,NCOA5,NDUFA10,NDUFA12,NDUFA2,NDUFA9,NDUFB10,NDUFB4,NDUFB9,NDUFS2,NDUFS4,NDUFV1,NKRF,NOTCH1,OARD1,ORC3…
GO:0042254	ribosome biogenesis	14	270	0.00013	ENSP00000236980,ENSP00000254928,ENSP00000258455,ENSP00000261708,ENSP00000265564,ENSP00000287025,ENSP00000308897,ENSP00000315017,ENSP00000332340,ENSP00000341082,ENSP00000350954,ENSP00000356134,ENSP00000362773,ENSP00000419370	DDX28,ERAL1,EXOSC7,FASTKD2,MALSU1,MRPL1,MRPL11,MRPL20,MRPS9,MTERF3,PIN4,TFB1M,UTP6,WDR37
GO:0044085	cellular component biogenesis	53	2556	0.00021	ENSP00000168216,ENSP00000184266,ENSP00000220764,ENSP00000230048,ENSP00000236980,ENSP00000244537,ENSP00000244571,ENSP00000252102,ENSP00000252244,ENSP00000252711,ENSP00000254810,ENSP00000254928,ENSP00000257789,ENSP00000258455,ENSP00000261708,ENSP00000262291,ENSP00000263578,ENSP00000265148,ENSP00000265564,ENSP00000266544,ENSP00000268668,ENSP00000269576,ENSP00000276689,ENSP00000277541,ENSP00000287025…	AARS2,ACAD9,ACOT13,CENPE,DDX28,DECR1,DNAJB12,ERAL1,EXOSC7,FASTKD2,FOXRED1,FXN,GRB7,H3F3B,HIST1H1E,HIST1H4F,HIST2H2BE,HIST2H2BF,HMGA1,HMGCL,HSD17B10,IBA57,KRT1,KRT10,MALSU1,MRPL1,MRPL11,MRPL20,MRPS9,MTERF3,NDUFA10,NDUFA12,NDUFA2,NDUFA9,NDUFB10,NDUFB4,NDUFB9,NDUFS2,NDUFS4,NDUFV1,NFU1,NOTCH1,ORC3,PIN4,PRKACA,RCC1,STX4,TFAM,TFB1M,TRIOBP,UTP6,VMP1,WDR37
GO:0009987	cellular process	190	14652	0.00025	ENSP00000003084,ENSP00000040738,ENSP00000081029,ENSP00000168216,ENSP00000177742,ENSP00000181839,ENSP00000184266,ENSP00000199706,ENSP00000205194,ENSP00000205402,ENSP00000215375,ENSP00000216034,ENSP00000220764,ENSP00000226578,ENSP00000228506,ENSP00000230048,ENSP00000234420,ENSP00000236980,ENSP00000243253,ENSP00000244537,ENSP00000244571,ENSP00000245046,ENSP00000246662,ENSP00000248958,ENSP00000250498…	AARS2,ACAD11,ACAD9,ACBD5,ACOT13,ADCK4,ADNP,AK2,AK3,AK4,ALDH1L2,ALDH6A1,ARPP19,ATP5C1,ATP5D,ATP5J,ATP8B1,BAZ1B,BDH1,BOD1L1,C2orf47,CC2D1B,CDK13,CDS1,CENPE,CERS2,CFTR,CHCHD3,CKMT1B,CNOT6L,COX6C,CPSF1,CTSV,CYCS,DAD1,DDX28,DECR1,DHTKD1,DLD,DLST,DMAP1,DNAJA3,DNAJB12,DNAJC1,DNAJC16,DPF2,DTYMK,EED,EEF1B2,EEF1D,EEF1G,EMC3,ENSG00000026036,ENSG00000086848,ERAL1,ERH,EXOSC7,FAIM,FASTKD2,FIP1L1,FOXRED1,FSTL1,…
GO:0051186	cofactor metabolic process	18	467	0.00028	ENSP00000205402,ENSP00000230048,ENSP00000258494,ENSP00000263035,ENSP00000266544,ENSP00000308610,ENSP00000315118,ENSP00000327070,ENSP00000331901,ENSP00000335304,ENSP00000355672,ENSP00000363614,ENSP00000366482,ENSP00000367923,ENSP00000369134,ENSP00000371362,ENSP00000377617,ENSP00000387219	ACOT13,ADCK4,ALDH1L2,DHTKD1,DLD,DLST,EEF1G,FXN,GPD2,HMGCL,IBA57,MDH2,MTHFD2,NADK2,NDUFA9,NFU1,PDHA1,SUCLA2
GO:0044267	cellular protein metabolic process	67	3603	0.00032	ENSP00000003084,ENSP00000081029,ENSP00000177742,ENSP00000181839,ENSP00000199706,ENSP00000205402,ENSP00000226578,ENSP00000236980,ENSP00000244537,ENSP00000244571,ENSP00000248958,ENSP00000250498,ENSP00000252244,ENSP00000253023,ENSP00000254810,ENSP00000254928,ENSP00000258383,ENSP00000258455,ENSP00000260102,ENSP00000263360,ENSP00000268379,ENSP00000269576,ENSP00000272418,ENSP00000285737,ENSP00000295030…	AARS2,BAZ1B,CDK13,CFTR,CTSV,CYCS,DAD1,DLD,DLST,DMAP1,DNAJB12,EED,EEF1B2,EEF1D,EEF1G,ENSG00000086848,ERAL1,FASTKD2,FSTL1,FXN,GADD45GIP1,GFM2,H3F3B,HIST1H1E,HIST1H4F,ICT1,KRT1,KRT10,KRT2,LONP2,MAD2L1,MANBA,MDH2,MRPL1,MRPL11,MRPL15,MRPL20,MRPL22,MRPL28,MRPL38,MRPL39,MRPL44,MRPL48,MRPS34,MRPS35,MRPS5,MRPS9,MST1R,MTIF3,MTMR1,MTMR14,PEX13,PIN4,PRKACA,RYBP,SDF2L1,SEL1L,STT3B,SUZ12,TARS2,TIMM50,TRIOBP,TS…
GO:0006732	coenzyme metabolic process	14	297	0.00034	ENSP00000205402,ENSP00000230048,ENSP00000258494,ENSP00000263035,ENSP00000266544,ENSP00000308610,ENSP00000315118,ENSP00000327070,ENSP00000335304,ENSP00000363614,ENSP00000367923,ENSP00000369134,ENSP00000371362,ENSP00000377617	ACOT13,ADCK4,ALDH1L2,DHTKD1,DLD,DLST,GPD2,HMGCL,MDH2,MTHFD2,NADK2,NDUFA9,PDHA1,SUCLA2
GO:0015866	ADP transport	4	9	0.00034	ENSP00000281456,ENSP00000370808,ENSP00000390722,ENSP00000457733	SLC25A17,SLC25A24,SLC25A4,SLC25A6
GO:0007006	mitochondrial membrane organization	9	123	0.00055	ENSP00000215375,ENSP00000216034,ENSP00000262570,ENSP00000281456,ENSP00000295079,ENSP00000349142,ENSP00000370808,ENSP00000389649,ENSP00000445806	ATP5C1,ATP5D,ATP5J,C2orf47,CHCHD3,SLC25A4,SLC25A6,TIMM50,TOMM22
GO:0015867	ATP transport	4	11	0.00061	ENSP00000281456,ENSP00000370808,ENSP00000390722,ENSP00000457733	SLC25A17,SLC25A24,SLC25A4,SLC25A6
GO:0042273	ribosomal large subunit biogenesis	7	68	0.00063	ENSP00000236980,ENSP00000308897,ENSP00000315017,ENSP00000332340,ENSP00000341082,ENSP00000350954,ENSP00000419370	DDX28,FASTKD2,MALSU1,MRPL1,MRPL11,MRPL20,WDR37
GO:0006796	phosphate-containing compound metabolic process	43	2065	0.0016	ENSP00000181839,ENSP00000184266,ENSP00000205402,ENSP00000215375,ENSP00000230048,ENSP00000236980,ENSP00000252102,ENSP00000252711,ENSP00000263035,ENSP00000266544,ENSP00000268379,ENSP00000268668,ENSP00000276689,ENSP00000283415,ENSP00000295887,ENSP00000296003,ENSP00000296474,ENSP00000296684,ENSP00000300283,ENSP00000304802,ENSP00000307786,ENSP00000308610,ENSP00000309591,ENSP00000315118,ENSP00000322450…	ACOT13,ADCK4,AK2,AK3,AK4,ATP5C1,ATP5D,ATP5J,BAZ1B,CDK13,CDS1,CKMT1B,CYCS,DHTKD1,DLD,DLST,DTYMK,ERH,FASTKD2,GPD2,HMGCL,LPCAT1,MDH2,MST1R,MTMR1,MTMR14,NADK2,NDUFA10,NDUFA12,NDUFA2,NDUFA9,NDUFB10,NDUFB4,NDUFB9,NDUFS2,NDUFS4,NDUFV1,PDHA1,PNPLA8,PRKACA,SUCLA2,TIMM50,UQCRC2
GO:0042255	ribosome assembly	6	58	0.0023	ENSP00000236980,ENSP00000254928,ENSP00000287025,ENSP00000308897,ENSP00000332340,ENSP00000341082	DDX28,ERAL1,FASTKD2,MRPL11,MRPL20,MTERF3
GO:1901679	nucleotide transmembrane transport	4	17	0.0023	ENSP00000281456,ENSP00000370808,ENSP00000390722,ENSP00000457733	SLC25A17,SLC25A24,SLC25A4,SLC25A6
GO:0022613	ribonucleoprotein complex biogenesis	15	409	0.0024	ENSP00000236980,ENSP00000254928,ENSP00000258455,ENSP00000261708,ENSP00000265564,ENSP00000287025,ENSP00000308897,ENSP00000315017,ENSP00000332340,ENSP00000341082,ENSP00000350954,ENSP00000356134,ENSP00000362773,ENSP00000403459,ENSP00000419370	DDX28,ERAL1,EXOSC7,FASTKD2,GRB7,MALSU1,MRPL1,MRPL11,MRPL20,MRPS9,MTERF3,PIN4,TFB1M,UTP6,WDR37
GO:0046395	carboxylic acid catabolic process	11	237	0.0031	ENSP00000168216,ENSP00000220764,ENSP00000258494,ENSP00000264990,ENSP00000295030,ENSP00000335304,ENSP00000363614,ENSP00000379568,ENSP00000380251,ENSP00000390722,ENSP00000450436	ACAD11,ACBD5,ALDH1L2,ALDH6A1,DECR1,DLST,HMGCL,HSD17B10,NUDT19,PEX13,SLC25A17
GO:0006733	oxidoreduction coenzyme metabolic process	8	124	0.0033	ENSP00000205402,ENSP00000263035,ENSP00000266544,ENSP00000308610,ENSP00000315118,ENSP00000327070,ENSP00000369134,ENSP00000371362	ADCK4,DHTKD1,DLD,GPD2,MDH2,NADK2,NDUFA9,PDHA1
GO:0007007	inner mitochondrial membrane organization	5	41	0.0043	ENSP00000215375,ENSP00000262570,ENSP00000295079,ENSP00000349142,ENSP00000389649	ATP5C1,ATP5D,ATP5J,C2orf47,CHCHD3
GO:0009165	nucleotide biosynthetic process	12	291	0.0043	ENSP00000205402,ENSP00000215375,ENSP00000263035,ENSP00000295887,ENSP00000304802,ENSP00000346921,ENSP00000349142,ENSP00000369134,ENSP00000371362,ENSP00000378743,ENSP00000389649,ENSP00000451080	AK2,AK4,ATP5C1,ATP5D,ATP5J,CDS1,DHTKD1,DLD,DTYMK,ERH,NADK2,PDHA1
GO:0016310	phosphorylation	29	1236	0.0043	ENSP00000181839,ENSP00000184266,ENSP00000205402,ENSP00000215375,ENSP00000236980,ENSP00000252102,ENSP00000252711,ENSP00000263035,ENSP00000266544,ENSP00000268379,ENSP00000268668,ENSP00000276689,ENSP00000296474,ENSP00000296684,ENSP00000300283,ENSP00000304802,ENSP00000307786,ENSP00000309591,ENSP00000315118,ENSP00000322450,ENSP00000330737,ENSP00000342434,ENSP00000346921,ENSP00000349142,ENSP00000356972…	ADCK4,AK2,AK3,AK4,ATP5C1,ATP5D,ATP5J,BAZ1B,CDK13,CKMT1B,CYCS,DHTKD1,DLD,DTYMK,FASTKD2,MST1R,NADK2,NDUFA10,NDUFA12,NDUFA2,NDUFA9,NDUFB10,NDUFB4,NDUFB9,NDUFS2,NDUFS4,NDUFV1,PRKACA,UQCRC2
GO:0010467	gene expression	64	3733	0.0052	ENSP00000081029,ENSP00000168216,ENSP00000177742,ENSP00000181839,ENSP00000199706,ENSP00000205194,ENSP00000244537,ENSP00000244571,ENSP00000254928,ENSP00000257181,ENSP00000258383,ENSP00000258455,ENSP00000260102,ENSP00000261708,ENSP00000262570,ENSP00000263063,ENSP00000263360,ENSP00000265564,ENSP00000268379,ENSP00000272418,ENSP00000277541,ENSP00000285737,ENSP00000287025,ENSP00000290231,ENSP00000296805…	AARS2,ADNP,BAZ1B,CC2D1B,CDK13,CHCHD3,CNOT6L,CPSF1,CTSV,DMAP1,DPF2,EED,EEF1B2,EEF1D,EEF1G,ERAL1,EXOSC7,FIP1L1,FXN,GADD45GIP1,GATAD2A,GFM2,HIST1H4F,HMGA1,HNRNPDL,HSD17B10,ICT1,LONP2,MRPL1,MRPL11,MRPL15,MRPL20,MRPL22,MRPL28,MRPL38,MRPL39,MRPL44,MRPL48,MRPS34,MRPS35,MRPS5,MRPS9,MTERF3,MTIF3,MTPAP,NAT14,NCOA5,NKRF,NOTCH1,PIN4,PRKACA,PRPF38A,RFC1,RYBP,SNAPC4,SUZ12,TARS2,TFAM,TFB1M,TSFM,TYW1,UQCRC2,UTP6…
GO:0022607	cellular component assembly	45	2343	0.0057	ENSP00000168216,ENSP00000184266,ENSP00000220764,ENSP00000230048,ENSP00000236980,ENSP00000244537,ENSP00000244571,ENSP00000252102,ENSP00000252244,ENSP00000252711,ENSP00000254810,ENSP00000254928,ENSP00000257789,ENSP00000262291,ENSP00000263578,ENSP00000265148,ENSP00000266544,ENSP00000268668,ENSP00000269576,ENSP00000276689,ENSP00000277541,ENSP00000287025,ENSP00000296684,ENSP00000307705,ENSP00000308897…	AARS2,ACAD9,ACOT13,CENPE,DDX28,DECR1,DNAJB12,ERAL1,FASTKD2,FOXRED1,FXN,GRB7,H3F3B,HIST1H1E,HIST1H4F,HIST2H2BE,HIST2H2BF,HMGA1,HMGCL,HSD17B10,IBA57,KRT1,KRT10,MRPL11,MRPL20,MTERF3,NDUFA10,NDUFA12,NDUFA2,NDUFA9,NDUFB10,NDUFB4,NDUFB9,NDUFS2,NDUFS4,NDUFV1,NFU1,NOTCH1,ORC3,PRKACA,RCC1,STX4,TFAM,TRIOBP,VMP1
GO:0034645	cellular macromolecule biosynthetic process	61	3518	0.0057	ENSP00000040738,ENSP00000081029,ENSP00000177742,ENSP00000181839,ENSP00000199706,ENSP00000205194,ENSP00000244537,ENSP00000244571,ENSP00000248958,ENSP00000250498,ENSP00000254928,ENSP00000257789,ENSP00000258383,ENSP00000258455,ENSP00000260102,ENSP00000262375,ENSP00000262570,ENSP00000263063,ENSP00000263360,ENSP00000272418,ENSP00000277541,ENSP00000287025,ENSP00000290231,ENSP00000295770,ENSP00000296805…	AARS2,ADNP,BAZ1B,BOD1L1,CC2D1B,CDK13,CHCHD3,CNOT6L,CPSF1,DAD1,DMAP1,DNAJA3,DPF2,EED,EEF1B2,EEF1D,EEF1G,ENSG00000086848,ERAL1,FIP1L1,GADD45GIP1,GATAD2A,GFM2,HIST1H4F,HMGA1,HNRNPDL,ICT1,MGME1,MRPL1,MRPL11,MRPL15,MRPL20,MRPL22,MRPL28,MRPL38,MRPL39,MRPL44,MRPL48,MRPS34,MRPS35,MRPS5,MRPS9,MTERF3,MTIF3,MTPAP,NAT14,NCOA5,NKRF,NOTCH1,ORC3,RFC1,RYBP,SDF2L1,SNAPC4,STT3B,SUZ12,TARS2,TFAM,TFB1M,TSFM,UBE2J1
GO:0006855	drug transmembrane transport	7	105	0.0067	ENSP00000281456,ENSP00000322020,ENSP00000370808,ENSP00000390722,ENSP00000445359,ENSP00000451962,ENSP00000457733	ATP8B1,PRAF2,SLC25A17,SLC25A22,SLC25A24,SLC25A4,SLC25A6
GO:0044260	cellular macromolecule metabolic process	96	6413	0.0099	ENSP00000003084,ENSP00000040738,ENSP00000081029,ENSP00000168216,ENSP00000177742,ENSP00000181839,ENSP00000199706,ENSP00000205194,ENSP00000205402,ENSP00000226578,ENSP00000234420,ENSP00000236980,ENSP00000244537,ENSP00000244571,ENSP00000248958,ENSP00000250498,ENSP00000252244,ENSP00000253023,ENSP00000254810,ENSP00000254928,ENSP00000257789,ENSP00000258383,ENSP00000258455,ENSP00000260102,ENSP00000262375…	AARS2,ADNP,BAZ1B,BOD1L1,CC2D1B,CDK13,CFTR,CHCHD3,CNOT6L,CPSF1,CTSV,CYCS,DAD1,DLD,DLST,DMAP1,DNAJA3,DNAJB12,DPF2,EED,EEF1B2,EEF1D,EEF1G,ENSG00000086848,ERAL1,EXOSC7,FASTKD2,FIP1L1,FSTL1,FXN,GADD45GIP1,GATAD2A,GFM2,H3F3B,HIST1H1E,HIST1H4F,HMGA1,HNRNPDL,HSD17B10,ICT1,KRT1,KRT10,KRT2,LONP2,MAD2L1,MANBA,MDH2,MGME1,MRPL1,MRPL11,MRPL15,MRPL20,MRPL22,MRPL28,MRPL38,MRPL39,MRPL44,MRPL48,MRPS34,MRPS35,MRPS5…
GO:0070734	histone H3-K27 methylation	3	11	0.0118	ENSP00000263360,ENSP00000307705,ENSP00000316578	EED,HIST1H1E,SUZ12
GO:0000027	ribosomal large subunit assembly	4	29	0.012	ENSP00000236980,ENSP00000308897,ENSP00000332340,ENSP00000341082	DDX28,FASTKD2,MRPL11,MRPL20
GO:1990542	mitochondrial transmembrane transport	6	83	0.012	ENSP00000215375,ENSP00000216034,ENSP00000295079,ENSP00000349142,ENSP00000389649,ENSP00000445806	ATP5C1,ATP5D,ATP5J,C2orf47,TIMM50,TOMM22
GO:0009062	fatty acid catabolic process	6	84	0.0126	ENSP00000220764,ENSP00000264990,ENSP00000295030,ENSP00000379568,ENSP00000380251,ENSP00000390722	ACAD11,ACBD5,DECR1,NUDT19,PEX13,SLC25A17
GO:0051262	protein tetramerization	8	157	0.0129	ENSP00000168216,ENSP00000220764,ENSP00000230048,ENSP00000244537,ENSP00000252244,ENSP00000269576,ENSP00000362937,ENSP00000363614	ACOT13,DECR1,HIST1H4F,HMGCL,HSD17B10,KRT1,KRT10,RCC1
GO:0036503	ERAD pathway	6	85	0.0131	ENSP00000248958,ENSP00000295770,ENSP00000337053,ENSP00000345575,ENSP00000381282,ENSP00000451261	DNAJB12,SDF2L1,SEL1L,STT3B,UBE2J1,VIMP
GO:0044282	small molecule catabolic process	13	388	0.0135	ENSP00000168216,ENSP00000220764,ENSP00000258494,ENSP00000264990,ENSP00000295030,ENSP00000308610,ENSP00000335304,ENSP00000363614,ENSP00000376184,ENSP00000379568,ENSP00000380251,ENSP00000390722,ENSP00000450436	ACAD11,ACBD5,ALDH1L2,ALDH6A1,BDH1,DECR1,DLST,GPD2,HMGCL,HSD17B10,NUDT19,PEX13,SLC25A17
GO:0019538	protein metabolic process	68	4194	0.0136	ENSP00000003084,ENSP00000081029,ENSP00000177742,ENSP00000181839,ENSP00000199706,ENSP00000205402,ENSP00000226578,ENSP00000236980,ENSP00000244537,ENSP00000244571,ENSP00000248958,ENSP00000250498,ENSP00000252244,ENSP00000253023,ENSP00000254810,ENSP00000254928,ENSP00000258383,ENSP00000258455,ENSP00000260102,ENSP00000263360,ENSP00000268379,ENSP00000269576,ENSP00000272418,ENSP00000285737,ENSP00000295030…	AARS2,BAZ1B,CDK13,CFTR,CTSV,CYCS,DAD1,DLD,DLST,DMAP1,DNAJB12,EED,EEF1B2,EEF1D,EEF1G,ENSG00000086848,ERAL1,FASTKD2,FSTL1,FXN,GADD45GIP1,GFM2,H3F3B,HIST1H1E,HIST1H4F,ICT1,KRT1,KRT10,KRT2,LONP2,MAD2L1,MANBA,MDH2,MRPL1,MRPL11,MRPL15,MRPL20,MRPL22,MRPL28,MRPL38,MRPL39,MRPL44,MRPL48,MRPS34,MRPS35,MRPS5,MRPS9,MST1R,MTIF3,MTMR1,MTMR14,PEX13,PIN4,PRKACA,RYBP,SDF2L1,SEL1L,SGSH,STT3B,SUZ12,TARS2,TIMM50,TRIO…
GO:0072530	purine-containing compound transmembrane transport	3	12	0.0136	ENSP00000281456,ENSP00000370808,ENSP00000390722	SLC25A17,SLC25A4,SLC25A6
GO:0042407	cristae formation	4	31	0.0142	ENSP00000215375,ENSP00000262570,ENSP00000349142,ENSP00000389649	ATP5C1,ATP5D,ATP5J,CHCHD3
GO:0006637	acyl-CoA metabolic process	6	88	0.0149	ENSP00000205402,ENSP00000230048,ENSP00000335304,ENSP00000363614,ENSP00000367923,ENSP00000369134	ACOT13,DLD,DLST,HMGCL,PDHA1,SUCLA2
GO:0016999	antibiotic metabolic process	7	124	0.0152	ENSP00000263035,ENSP00000299518,ENSP00000327070,ENSP00000335304,ENSP00000367923,ENSP00000369134,ENSP00000370223	DHTKD1,DLST,IDH3A,IDH3B,MDH2,PDHA1,SUCLA2
GO:0006626	protein targeting to mitochondrion	5	58	0.0156	ENSP00000216034,ENSP00000268379,ENSP00000295079,ENSP00000370808,ENSP00000445806	C2orf47,SLC25A6,TIMM50,TOMM22,UQCRC2
GO:1901264	carbohydrate derivative transport	5	59	0.0166	ENSP00000281456,ENSP00000370808,ENSP00000390722,ENSP00000451112,ENSP00000457733	NPC2,SLC25A17,SLC25A24,SLC25A4,SLC25A6
GO:0071826	ribonucleoprotein complex subunit organization	9	215	0.0207	ENSP00000236980,ENSP00000254928,ENSP00000287025,ENSP00000296805,ENSP00000308897,ENSP00000332340,ENSP00000341082,ENSP00000370508,ENSP00000403459	DDX28,ERAL1,FASTKD2,GFM2,GRB7,MRPL11,MRPL20,MTERF3,MTIF3
GO:0006333	chromatin assembly or disassembly	8	174	0.0222	ENSP00000244537,ENSP00000254810,ENSP00000307705,ENSP00000323967,ENSP00000342434,ENSP00000358151,ENSP00000399888,ENSP00000445831	BAZ1B,H3F3B,HIST1H1E,HIST1H4F,HIST2H2BE,HIST2H2BF,HMGA1,SMARCE1
GO:0051188	cofactor biosynthetic process	9	218	0.0224	ENSP00000205402,ENSP00000263035,ENSP00000266544,ENSP00000315118,ENSP00000355672,ENSP00000366482,ENSP00000367923,ENSP00000369134,ENSP00000371362	ADCK4,DHTKD1,DLD,FXN,IBA57,NADK2,NDUFA9,PDHA1,SUCLA2
GO:0043648	dicarboxylic acid metabolic process	6	97	0.0227	ENSP00000205402,ENSP00000258494,ENSP00000327070,ENSP00000335304,ENSP00000367923,ENSP00000377617	ALDH1L2,DLD,DLST,MDH2,MTHFD2,SUCLA2
GO:0000959	mitochondrial RNA metabolic process	4	37	0.0241	ENSP00000168216,ENSP00000244571,ENSP00000358060,ENSP00000420588	AARS2,HSD17B10,TARS2,TFAM
GO:0006396	RNA processing	20	825	0.0251	ENSP00000168216,ENSP00000181839,ENSP00000244571,ENSP00000257181,ENSP00000258383,ENSP00000258455,ENSP00000261708,ENSP00000263063,ENSP00000265564,ENSP00000287025,ENSP00000309591,ENSP00000315017,ENSP00000336752,ENSP00000350954,ENSP00000352645,ENSP00000356134,ENSP00000362773,ENSP00000424896,ENSP00000483254,ENSP00000484669	AARS2,CDK13,CNOT6L,CPSF1,EXOSC7,FIP1L1,HNRNPDL,HSD17B10,MRPL1,MRPL44,MRPS9,MTERF3,MTPAP,PIN4,PRKACA,PRPF38A,TFB1M,TYW1,UTP6,WDR37
GO:0006605	protein targeting	11	318	0.0251	ENSP00000216034,ENSP00000243253,ENSP00000262213,ENSP00000268379,ENSP00000285737,ENSP00000295030,ENSP00000295079,ENSP00000363614,ENSP00000370808,ENSP00000380251,ENSP00000445806	C2orf47,HMGCL,LONP2,NUDT19,PEX13,SEC61A1,SLC25A6,TIMM50,TOMM22,TRAM1,UQCRC2
GO:0015748	organophosphate ester transport	6	100	0.0255	ENSP00000281456,ENSP00000370808,ENSP00000390722,ENSP00000445359,ENSP00000451112,ENSP00000457733	ATP8B1,NPC2,SLC25A17,SLC25A24,SLC25A4,SLC25A6
GO:1902775	mitochondrial large ribosomal subunit assembly	2	3	0.0263	ENSP00000236980,ENSP00000332340	DDX28,FASTKD2
GO:0009142	nucleoside triphosphate biosynthetic process	6	103	0.0289	ENSP00000215375,ENSP00000263035,ENSP00000304802,ENSP00000349142,ENSP00000378743,ENSP00000389649	AK4,ATP5C1,ATP5D,ATP5J,DHTKD1,DTYMK
GO:0042776	mitochondrial ATP synthesis coupled proton transport	3	17	0.0289	ENSP00000215375,ENSP00000349142,ENSP00000389649	ATP5C1,ATP5D,ATP5J
GO:0009083	branched-chain amino acid catabolic process	3	18	0.0327	ENSP00000168216,ENSP00000363614,ENSP00000450436	ALDH6A1,HMGCL,HSD17B10
GO:0044248	cellular catabolic process	32	1646	0.0337	ENSP00000168216,ENSP00000220764,ENSP00000248958,ENSP00000258494,ENSP00000262291,ENSP00000263035,ENSP00000263063,ENSP00000264990,ENSP00000265564,ENSP00000285737,ENSP00000287025,ENSP00000295030,ENSP00000295770,ENSP00000296003,ENSP00000296509,ENSP00000308610,ENSP00000314606,ENSP00000325313,ENSP00000335304,ENSP00000337053,ENSP00000345575,ENSP00000363614,ENSP00000376184,ENSP00000379568,ENSP00000380251…	ACAD11,ACBD5,ALDH1L2,ALDH6A1,BDH1,CNOT6L,CTSV,DECR1,DHTKD1,DLST,DNAJB12,EXOSC7,GPD2,HMGCL,HSD17B10,LONP2,MAD2L1,MAP1S,MTERF3,MTMR14,MTPAP,NUDT19,PEX13,PNPLA8,SDF2L1,SEL1L,SGSH,SLC25A17,STT3B,UBE2J1,VIMP,VMP1
GO:0046496	nicotinamide nucleotide metabolic process	6	107	0.0337	ENSP00000205402,ENSP00000263035,ENSP00000308610,ENSP00000327070,ENSP00000369134,ENSP00000371362	DHTKD1,DLD,GPD2,MDH2,NADK2,PDHA1
GO:0015853	adenine transport	2	4	0.0362	ENSP00000281456,ENSP00000370808	SLC25A4,SLC25A6
GO:0016226	iron-sulfur cluster assembly	3	19	0.0362	ENSP00000355672,ENSP00000366482,ENSP00000387219	FXN,IBA57,NFU1
GO:0106077	histone succinylation	2	4	0.0362	ENSP00000205402,ENSP00000335304	DLD,DLST
GO:0070316	regulation of G0 to G1 transition	4	44	0.0381	ENSP00000263360,ENSP00000316578,ENSP00000355354,ENSP00000419494	EED,RYBP,SOX15,SUZ12
GO:0070268	cornification	6	112	0.039	ENSP00000246662,ENSP00000252244,ENSP00000269576,ENSP00000301653,ENSP00000310861,ENSP00000369317	KRT1,KRT10,KRT16,KRT2,KRT6A,KRT9
GO:0006261	DNA-dependent DNA replication	6	114	0.0419	ENSP00000040738,ENSP00000257789,ENSP00000262375,ENSP00000366939,ENSP00000371321,ENSP00000399888	BOD1L1,DNAJA3,HMGA1,MGME1,ORC3,RFC1
GO:0006104	succinyl-CoA metabolic process	2	5	0.0465	ENSP00000335304,ENSP00000367923	DLST,SUCLA2
GO:0045814	negative regulation of gene expression, epigenetic	6	117	0.0465	ENSP00000244537,ENSP00000254810,ENSP00000263360,ENSP00000308405,ENSP00000316578,ENSP00000332194	EED,H2AFV,H3F3B,HIST1H4F,HIST2H2AC,SUZ12
GO:0051546	keratinocyte migration	2	5	0.0465	ENSP00000301653,ENSP00000310861	KRT16,KRT2
GO:0055129	L-proline biosynthetic process	2	5	0.0465	ENSP00000342502,ENSP00000384949	PYCR1,PYCR2
GO:0090407	organophosphate biosynthetic process	15	577	0.0465	ENSP00000205402,ENSP00000215375,ENSP00000263035,ENSP00000283415,ENSP00000295887,ENSP00000296003,ENSP00000304802,ENSP00000346921,ENSP00000349142,ENSP00000359417,ENSP00000369134,ENSP00000371362,ENSP00000378743,ENSP00000389649,ENSP00000451080	AK2,AK4,ATP5C1,ATP5D,ATP5J,CDS1,DHTKD1,DLD,DTYMK,ERH,LPCAT1,MTMR1,MTMR14,NADK2,PDHA1
GO:0000002	mitochondrial genome maintenance	3	22	0.0467	ENSP00000262375,ENSP00000281456,ENSP00000366939	DNAJA3,MGME1,SLC25A4
GO:0071824	protein-DNA complex subunit organization	9	253	0.047	ENSP00000244537,ENSP00000254810,ENSP00000257789,ENSP00000265148,ENSP00000307705,ENSP00000323967,ENSP00000358151,ENSP00000399888,ENSP00000445831	CENPE,H3F3B,HIST1H1E,HIST1H4F,HIST2H2BE,HIST2H2BF,HMGA1,ORC3,SMARCE1

## Sheet: Biological Functions
#term ID	term description	observed gene count	background gene count	false discovery rate	matching proteins in your network (IDs)	matching proteins in your network (labels)
GO:0016491	oxidoreductase activity	33	716	6.49e-09	ENSP00000168216,ENSP00000184266,ENSP00000205402,ENSP00000220764,ENSP00000252102,ENSP00000252711,ENSP00000258494,ENSP00000263035,ENSP00000263578,ENSP00000264990,ENSP00000266544,ENSP00000268668,ENSP00000276689,ENSP00000296684,ENSP00000299518,ENSP00000307786,ENSP00000308610,ENSP00000312618,ENSP00000322450,ENSP00000327070,ENSP00000330737,ENSP00000342502,ENSP00000356972,ENSP00000366482,ENSP00000369134…	ACAD11,ACAD9,ALDH1L2,ALDH6A1,BDH1,COX6C,CYCS,DECR1,DHTKD1,DLD,FOXRED1,FXN,GPD2,HSD17B10,HSDL2,IDH3A,IDH3B,MDH2,MTHFD2,NDUFA10,NDUFA12,NDUFA2,NDUFA9,NDUFB10,NDUFB4,NDUFB9,NDUFS2,NDUFS4,NDUFV1,PDHA1,PYCR1,PYCR2,RDH14
GO:0008137	NADH dehydrogenase (ubiquinone) activity	10	45	1.26e-07	ENSP00000184266,ENSP00000252102,ENSP00000252711,ENSP00000266544,ENSP00000268668,ENSP00000276689,ENSP00000296684,ENSP00000322450,ENSP00000330737,ENSP00000356972	NDUFA10,NDUFA12,NDUFA2,NDUFA9,NDUFB10,NDUFB4,NDUFB9,NDUFS2,NDUFS4,NDUFV1
GO:0016651	oxidoreductase activity, acting on NAD(P)H	12	109	9.94e-07	ENSP00000184266,ENSP00000205402,ENSP00000220764,ENSP00000252102,ENSP00000252711,ENSP00000266544,ENSP00000268668,ENSP00000276689,ENSP00000296684,ENSP00000322450,ENSP00000330737,ENSP00000356972	DECR1,DLD,NDUFA10,NDUFA12,NDUFA2,NDUFA9,NDUFB10,NDUFB4,NDUFB9,NDUFS2,NDUFS4,NDUFV1
GO:0097159	organic cyclic compound binding	97	5382	6.3e-06	ENSP00000003084,ENSP00000168216,ENSP00000181839,ENSP00000205194,ENSP00000205402,ENSP00000216780,ENSP00000220764,ENSP00000234420,ENSP00000236980,ENSP00000244537,ENSP00000244571,ENSP00000253023,ENSP00000254810,ENSP00000254928,ENSP00000257789,ENSP00000258383,ENSP00000261708,ENSP00000262375,ENSP00000263035,ENSP00000263063,ENSP00000263360,ENSP00000264990,ENSP00000265148,ENSP00000265564,ENSP00000271688…	AARS2,ACAD11,ACAD9,ACBD5,ADCK4,ADNP,AK2,AK3,AK4,ALDH6A1,ATP8B1,BAZ1B,CC2D1B,CDK13,CENPE,CERS2,CFTR,CKMT1B,CPSF1,CYCS,DDX28,DECR1,DHTKD1,DLD,DNAJA3,DNAJC1,DTYMK,EED,EEF1B2,EEF1D,EEF1G,ERAL1,ERH,EXOSC7,FASTKD2,GATAD2A,GFM2,GRB7,H2AFV,H3F3B,HIST1H1E,HIST1H4F,HIST2H2AC,HIST2H2BE,HIST2H2BF,HMGA1,HMGCL,HMGN2,HNRNPDL,HSD17B10,ICT1,IDH3A,IDH3B,LONP2,MAP1S,MRPL1,MRPL11,MRPL20,MRPL39,MRPL44,MSH6,MST1R,MTER…
GO:1901363	heterocyclic compound binding	96	5305	6.3e-06	ENSP00000003084,ENSP00000168216,ENSP00000181839,ENSP00000205194,ENSP00000205402,ENSP00000216780,ENSP00000220764,ENSP00000234420,ENSP00000236980,ENSP00000244537,ENSP00000244571,ENSP00000253023,ENSP00000254810,ENSP00000254928,ENSP00000257789,ENSP00000258383,ENSP00000261708,ENSP00000262375,ENSP00000263035,ENSP00000263063,ENSP00000263360,ENSP00000264990,ENSP00000265148,ENSP00000265564,ENSP00000271688…	AARS2,ACAD11,ACAD9,ACBD5,ADCK4,ADNP,AK2,AK3,AK4,ALDH6A1,ATP8B1,BAZ1B,CC2D1B,CDK13,CENPE,CERS2,CFTR,CKMT1B,CPSF1,CYCS,DDX28,DECR1,DHTKD1,DLD,DNAJA3,DNAJC1,DTYMK,EED,EEF1B2,EEF1D,EEF1G,ERAL1,ERH,EXOSC7,FASTKD2,GATAD2A,GFM2,GRB7,H2AFV,H3F3B,HIST1H1E,HIST1H4F,HIST2H2AC,HIST2H2BE,HIST2H2BF,HMGA1,HMGCL,HMGN2,HNRNPDL,HSD17B10,ICT1,IDH3A,IDH3B,LONP2,MAP1S,MRPL1,MRPL11,MRPL20,MRPL39,MRPL44,MSH6,MST1R,MTER…
GO:0003824	catalytic activity	98	5592	1.65e-05	ENSP00000003084,ENSP00000168216,ENSP00000181839,ENSP00000184266,ENSP00000205194,ENSP00000205402,ENSP00000215375,ENSP00000216780,ENSP00000220764,ENSP00000226578,ENSP00000230048,ENSP00000234420,ENSP00000236980,ENSP00000244571,ENSP00000248958,ENSP00000250498,ENSP00000252102,ENSP00000252711,ENSP00000253023,ENSP00000258383,ENSP00000258494,ENSP00000263035,ENSP00000263063,ENSP00000263360,ENSP00000263578…	AARS2,ACAD11,ACAD9,ACOT13,ADCK4,AK2,AK3,AK4,ALDH1L2,ALDH6A1,ATP5C1,ATP5D,ATP8B1,BAZ1B,BDH1,CDK13,CDS1,CENPE,CERS2,CFTR,CKMT1B,CNOT6L,COX6C,CTSV,CYCS,DAD1,DBT,DDX28,DECR1,DHTKD1,DLD,DLST,DTYMK,EED,EEF1G,ENSG00000086848,EXOSC7,FASTKD2,FOXRED1,FXN,GFM2,GPD2,HMGA1,HMGCL,HSD17B10,HSDL2,IBA57,ICT1,IDH3A,IDH3B,LONP2,LPCAT1,MANBA,MDH2,MGME1,MRPL44,MSH6,MST1R,MTHFD2,MTMR1,MTMR14,MTPAP,NADK2,NAT14,NDUFA10,…
GO:0050662	coenzyme binding	14	274	0.00025	ENSP00000205402,ENSP00000220764,ENSP00000263035,ENSP00000264990,ENSP00000266544,ENSP00000299518,ENSP00000312618,ENSP00000322450,ENSP00000352645,ENSP00000356972,ENSP00000363614,ENSP00000370223,ENSP00000379568,ENSP00000450436	ACAD11,ACAD9,ACBD5,ALDH6A1,DECR1,DHTKD1,DLD,HMGCL,IDH3A,IDH3B,NDUFA9,NDUFS2,NDUFV1,TYW1
GO:0000166	nucleotide binding	46	2097	0.00038	ENSP00000003084,ENSP00000181839,ENSP00000205402,ENSP00000216780,ENSP00000220764,ENSP00000234420,ENSP00000244571,ENSP00000253023,ENSP00000254928,ENSP00000262375,ENSP00000263063,ENSP00000264990,ENSP00000265148,ENSP00000285737,ENSP00000296474,ENSP00000296805,ENSP00000299518,ENSP00000300283,ENSP00000304802,ENSP00000305682,ENSP00000307705,ENSP00000309591,ENSP00000312618,ENSP00000315118,ENSP00000322450…	AARS2,ACAD11,ACAD9,ACBD5,ADCK4,AK2,AK3,AK4,ALDH6A1,ATP8B1,BAZ1B,CDK13,CENPE,CFTR,CKMT1B,DDX28,DECR1,DLD,DNAJA3,DTYMK,ERAL1,ERH,GFM2,HIST1H1E,HMGCL,IDH3A,IDH3B,LONP2,MRPL39,MSH6,MST1R,MTPAP,NADK2,NDUFS2,NDUFV1,PCK2,PNPLA8,PRKACA,RFC1,SMC6,SUCLA2,TARS2,TYW1,UBE2J1,UBE2M,VDAC2
GO:0003735	structural constituent of ribosome	10	146	0.00044	ENSP00000081029,ENSP00000177742,ENSP00000199706,ENSP00000258455,ENSP00000260102,ENSP00000272418,ENSP00000308897,ENSP00000315017,ENSP00000341082,ENSP00000431040	MRPL1,MRPL11,MRPL15,MRPL20,MRPL22,MRPL28,MRPS34,MRPS35,MRPS5,MRPS9
GO:0005347	ATP transmembrane transporter activity	4	9	0.00044	ENSP00000281456,ENSP00000370808,ENSP00000390722,ENSP00000457733	SLC25A17,SLC25A24,SLC25A4,SLC25A6
GO:0015217	ADP transmembrane transporter activity	4	9	0.00044	ENSP00000281456,ENSP00000370808,ENSP00000390722,ENSP00000457733	SLC25A17,SLC25A24,SLC25A4,SLC25A6
GO:0015605	organophosphate ester transmembrane transporter activity	5	24	0.00057	ENSP00000281456,ENSP00000370808,ENSP00000390722,ENSP00000445359,ENSP00000457733	ATP8B1,SLC25A17,SLC25A24,SLC25A4,SLC25A6
GO:0036094	small molecule binding	50	2460	0.0007	ENSP00000003084,ENSP00000181839,ENSP00000205402,ENSP00000216780,ENSP00000220764,ENSP00000226578,ENSP00000234420,ENSP00000244571,ENSP00000253023,ENSP00000254928,ENSP00000262375,ENSP00000263035,ENSP00000263063,ENSP00000264990,ENSP00000265148,ENSP00000285737,ENSP00000296474,ENSP00000296805,ENSP00000299518,ENSP00000300283,ENSP00000304802,ENSP00000305682,ENSP00000307705,ENSP00000309591,ENSP00000312618…	AARS2,ACAD11,ACAD9,ACBD5,ADCK4,AK2,AK3,AK4,ALDH6A1,ATP8B1,BAZ1B,CDK13,CENPE,CFTR,CKMT1B,DDX28,DECR1,DHTKD1,DLD,DNAJA3,DTYMK,ERAL1,ERH,GFM2,HIST1H1E,HMGCL,IDH3A,IDH3B,LONP2,MANBA,MRPL39,MSH6,MST1R,MTPAP,NADK2,NDUFS2,NDUFV1,NPC2,OARD1,PCK2,PNPLA8,PRKACA,RFC1,SMC6,SUCLA2,TARS2,TYW1,UBE2J1,UBE2M,VDAC2
GO:0003723	RNA binding	24	850	0.0011	ENSP00000168216,ENSP00000236980,ENSP00000244571,ENSP00000254928,ENSP00000258383,ENSP00000261708,ENSP00000265564,ENSP00000287025,ENSP00000301585,ENSP00000308897,ENSP00000313877,ENSP00000315017,ENSP00000316578,ENSP00000323967,ENSP00000331901,ENSP00000332340,ENSP00000341082,ENSP00000370508,ENSP00000376056,ENSP00000403459,ENSP00000410059,ENSP00000445806,ENSP00000483254,ENSP00000484669	AARS2,CPSF1,DDX28,EEF1B2,EEF1D,EEF1G,ERAL1,EXOSC7,FASTKD2,GRB7,HNRNPDL,HSD17B10,ICT1,MRPL1,MRPL11,MRPL20,MRPL44,MTERF3,MTIF3,SMARCE1,SUZ12,TIMM50,TSFM,UTP6
GO:0048037	cofactor binding	17	481	0.0011	ENSP00000205402,ENSP00000220764,ENSP00000263035,ENSP00000264990,ENSP00000266544,ENSP00000299518,ENSP00000307786,ENSP00000312618,ENSP00000322450,ENSP00000352645,ENSP00000356972,ENSP00000363614,ENSP00000366482,ENSP00000370223,ENSP00000379568,ENSP00000387219,ENSP00000450436	ACAD11,ACAD9,ACBD5,ALDH6A1,CYCS,DECR1,DHTKD1,DLD,FXN,HMGCL,IDH3A,IDH3B,NDUFA9,NDUFS2,NDUFV1,NFU1,TYW1
GO:0003746	translation elongation factor activity	4	16	0.0016	ENSP00000313877,ENSP00000331901,ENSP00000376056,ENSP00000410059	EEF1B2,EEF1D,EEF1G,TSFM
GO:0016646	oxidoreductase activity, acting on the CH-NH group of donors, NAD or NADP as acceptor	4	17	0.0019	ENSP00000258494,ENSP00000342502,ENSP00000377617,ENSP00000384949	ALDH1L2,MTHFD2,PYCR1,PYCR2
GO:0019843	rRNA binding	6	60	0.0021	ENSP00000236980,ENSP00000254928,ENSP00000287025,ENSP00000308897,ENSP00000332340,ENSP00000341082	DDX28,ERAL1,FASTKD2,MRPL11,MRPL20,MTERF3
GO:0008135	translation factor activity, RNA binding	6	84	0.0106	ENSP00000301585,ENSP00000313877,ENSP00000331901,ENSP00000370508,ENSP00000376056,ENSP00000410059	EEF1B2,EEF1D,EEF1G,ICT1,MTIF3,TSFM
GO:0031490	chromatin DNA binding	6	87	0.0122	ENSP00000254810,ENSP00000277541,ENSP00000307705,ENSP00000316578,ENSP00000355228,ENSP00000362937	H3F3B,HIST1H1E,HMGN2,NOTCH1,RCC1,SUZ12
GO:0051287	NAD binding	5	57	0.0124	ENSP00000205402,ENSP00000299518,ENSP00000322450,ENSP00000356972,ENSP00000370223	DLD,IDH3A,IDH3B,NDUFS2,NDUFV1
GO:0046899	nucleoside triphosphate adenylate kinase activity	2	2	0.0142	ENSP00000371230,ENSP00000378743	AK3,AK4
GO:0030280	structural constituent of epidermis	3	14	0.0155	ENSP00000252244,ENSP00000269576,ENSP00000310861	KRT1,KRT10,KRT2
GO:0032559	adenyl ribonucleotide binding	31	1514	0.0158	ENSP00000003084,ENSP00000181839,ENSP00000234420,ENSP00000244571,ENSP00000253023,ENSP00000262375,ENSP00000263063,ENSP00000265148,ENSP00000285737,ENSP00000296474,ENSP00000300283,ENSP00000304802,ENSP00000307705,ENSP00000309591,ENSP00000315118,ENSP00000332340,ENSP00000342434,ENSP00000346921,ENSP00000358060,ENSP00000363614,ENSP00000367923,ENSP00000371230,ENSP00000371321,ENSP00000371362,ENSP00000378743…	AARS2,ACBD5,ADCK4,AK2,AK3,AK4,ALDH6A1,ATP8B1,BAZ1B,CDK13,CENPE,CFTR,CKMT1B,DDX28,DNAJA3,DTYMK,HIST1H1E,HMGCL,LONP2,MSH6,MST1R,MTPAP,NADK2,PNPLA8,PRKACA,RFC1,SMC6,SUCLA2,TARS2,UBE2J1,UBE2M
GO:0051536	iron-sulfur cluster binding	5	62	0.0158	ENSP00000322450,ENSP00000352645,ENSP00000356972,ENSP00000366482,ENSP00000387219	FXN,NDUFS2,NDUFV1,NFU1,TYW1
GO:0032553	ribonucleotide binding	36	1868	0.0159	ENSP00000003084,ENSP00000181839,ENSP00000216780,ENSP00000234420,ENSP00000244571,ENSP00000253023,ENSP00000254928,ENSP00000262375,ENSP00000263063,ENSP00000265148,ENSP00000285737,ENSP00000296474,ENSP00000296805,ENSP00000300283,ENSP00000304802,ENSP00000307705,ENSP00000309591,ENSP00000315118,ENSP00000322450,ENSP00000332340,ENSP00000342434,ENSP00000346921,ENSP00000352645,ENSP00000358060,ENSP00000363614…	AARS2,ACBD5,ADCK4,AK2,AK3,AK4,ALDH6A1,ATP8B1,BAZ1B,CDK13,CENPE,CFTR,CKMT1B,DDX28,DNAJA3,DTYMK,ERAL1,GFM2,HIST1H1E,HMGCL,LONP2,MSH6,MST1R,MTPAP,NADK2,NDUFV1,PCK2,PNPLA8,PRKACA,RFC1,SMC6,SUCLA2,TARS2,TYW1,UBE2J1,UBE2M
GO:0016614	oxidoreductase activity, acting on CH-OH group of donors	7	135	0.0161	ENSP00000168216,ENSP00000299518,ENSP00000308610,ENSP00000327070,ENSP00000370223,ENSP00000370648,ENSP00000376184	BDH1,GPD2,HSD17B10,IDH3A,IDH3B,MDH2,RDH14
GO:0000062	fatty-acyl-CoA binding	3	17	0.0178	ENSP00000363614,ENSP00000379568,ENSP00000450436	ACBD5,ALDH6A1,HMGCL
GO:0004449	isocitrate dehydrogenase (NAD+) activity	2	3	0.0178	ENSP00000299518,ENSP00000370223	IDH3A,IDH3B
GO:0004735	pyrroline-5-carboxylate reductase activity	2	3	0.0178	ENSP00000342502,ENSP00000384949	PYCR1,PYCR2
GO:0005471	ATP:ADP antiporter activity	2	3	0.0178	ENSP00000281456,ENSP00000370808	SLC25A4,SLC25A6
GO:0009055	electron transfer activity	6	103	0.0178	ENSP00000205402,ENSP00000307786,ENSP00000330737,ENSP00000356972,ENSP00000370223,ENSP00000428895	COX6C,CYCS,DLD,IDH3B,NDUFA12,NDUFS2
GO:0015207	adenine transmembrane transporter activity	2	3	0.0178	ENSP00000281456,ENSP00000370808	SLC25A4,SLC25A6
GO:0070991	medium-chain-acyl-CoA dehydrogenase activity	2	3	0.0178	ENSP00000264990,ENSP00000312618	ACAD11,ACAD9
GO:0003676	nucleic acid binding	55	3332	0.0189	ENSP00000168216,ENSP00000181839,ENSP00000205194,ENSP00000234420,ENSP00000236980,ENSP00000244537,ENSP00000244571,ENSP00000254810,ENSP00000254928,ENSP00000257789,ENSP00000258383,ENSP00000261708,ENSP00000263360,ENSP00000265564,ENSP00000271688,ENSP00000277541,ENSP00000287025,ENSP00000298532,ENSP00000301585,ENSP00000307705,ENSP00000308405,ENSP00000308897,ENSP00000313877,ENSP00000315017,ENSP00000316578…	AARS2,ADNP,CC2D1B,CDK13,CERS2,CPSF1,DDX28,DNAJC1,EED,EEF1B2,EEF1D,EEF1G,ERAL1,ERH,EXOSC7,FASTKD2,GATAD2A,GRB7,H2AFV,H3F3B,HIST1H1E,HIST1H4F,HIST2H2AC,HIST2H2BE,HIST2H2BF,HMGA1,HMGN2,HNRNPDL,HSD17B10,ICT1,MAP1S,MRPL1,MRPL11,MRPL20,MRPL44,MSH6,MTERF3,MTIF3,NAT14,NKRF,NOTCH1,ORC3,PIN4,RCC1,RFC1,RYBP,SMARCE1,SNAPC4,SOX15,SUZ12,TFAM,TFB1M,TIMM50,TSFM,UTP6
GO:0016903	oxidoreductase activity, acting on the aldehyde or oxo group of donors	4	41	0.0189	ENSP00000258494,ENSP00000263035,ENSP00000369134,ENSP00000450436	ALDH1L2,ALDH6A1,DHTKD1,PDHA1
GO:0051539	4 iron, 4 sulfur cluster binding	4	41	0.0189	ENSP00000322450,ENSP00000352645,ENSP00000356972,ENSP00000387219	NDUFS2,NDUFV1,NFU1,TYW1
GO:0016776	phosphotransferase activity, phosphate group as acceptor	4	42	0.0194	ENSP00000304802,ENSP00000346921,ENSP00000371230,ENSP00000378743	AK2,AK3,AK4,DTYMK
GO:0003682	chromatin binding	14	501	0.0205	ENSP00000234420,ENSP00000254810,ENSP00000263360,ENSP00000277541,ENSP00000290231,ENSP00000307705,ENSP00000316578,ENSP00000323967,ENSP00000355228,ENSP00000355354,ENSP00000362937,ENSP00000379346,ENSP00000399888,ENSP00000420588	ADNP,EED,H3F3B,HIST1H1E,HMGA1,HMGN2,MSH6,NCOA5,NOTCH1,RCC1,SMARCE1,SOX15,SUZ12,TFAM
GO:0004579	dolichyl-diphosphooligosaccharide-protein glycotransferase activity	2	4	0.0205	ENSP00000250498,ENSP00000295770	DAD1,STT3B
GO:0005198	structural molecule activity	17	679	0.0212	ENSP00000081029,ENSP00000177742,ENSP00000199706,ENSP00000246662,ENSP00000252244,ENSP00000258455,ENSP00000260102,ENSP00000262570,ENSP00000269576,ENSP00000272418,ENSP00000301653,ENSP00000308897,ENSP00000310861,ENSP00000315017,ENSP00000341082,ENSP00000369317,ENSP00000431040	CHCHD3,KRT1,KRT10,KRT16,KRT2,KRT6A,KRT9,MRPL1,MRPL11,MRPL15,MRPL20,MRPL22,MRPL28,MRPS34,MRPS35,MRPS5,MRPS9
GO:0043021	ribonucleoprotein complex binding	6	116	0.0258	ENSP00000243253,ENSP00000254928,ENSP00000295079,ENSP00000370508,ENSP00000419370,ENSP00000445806	C2orf47,ERAL1,MALSU1,MTIF3,SEC61A1,TIMM50
GO:0004466	long-chain-acyl-CoA dehydrogenase activity	2	5	0.0265	ENSP00000264990,ENSP00000312618	ACAD11,ACAD9
GO:0016616	oxidoreductase activity, acting on the CH-OH group of donors, NAD or NADP as acceptor	6	118	0.0265	ENSP00000168216,ENSP00000299518,ENSP00000327070,ENSP00000370223,ENSP00000370648,ENSP00000376184	BDH1,HSD17B10,IDH3A,IDH3B,MDH2,RDH14
GO:0015078	proton transmembrane transporter activity	6	120	0.0278	ENSP00000215375,ENSP00000228318,ENSP00000322020,ENSP00000349142,ENSP00000389649,ENSP00000428895	ATP5C1,ATP5D,ATP5J,COX6C,SLC25A22,SLC25A3
GO:0019205	nucleobase-containing compound kinase activity	4	49	0.0278	ENSP00000304802,ENSP00000346921,ENSP00000371230,ENSP00000378743	AK2,AK3,AK4,DTYMK
GO:0032555	purine ribonucleotide binding	34	1853	0.0279	ENSP00000003084,ENSP00000181839,ENSP00000216780,ENSP00000234420,ENSP00000244571,ENSP00000253023,ENSP00000254928,ENSP00000262375,ENSP00000263063,ENSP00000265148,ENSP00000285737,ENSP00000296474,ENSP00000296805,ENSP00000300283,ENSP00000304802,ENSP00000307705,ENSP00000309591,ENSP00000315118,ENSP00000332340,ENSP00000342434,ENSP00000346921,ENSP00000358060,ENSP00000363614,ENSP00000367923,ENSP00000371230…	AARS2,ACBD5,ADCK4,AK2,AK3,AK4,ALDH6A1,ATP8B1,BAZ1B,CDK13,CENPE,CFTR,CKMT1B,DDX28,DNAJA3,DTYMK,ERAL1,GFM2,HIST1H1E,HMGCL,LONP2,MSH6,MST1R,MTPAP,NADK2,PCK2,PNPLA8,PRKACA,RFC1,SMC6,SUCLA2,TARS2,UBE2J1,UBE2M
GO:0097367	carbohydrate derivative binding	38	2163	0.0306	ENSP00000003084,ENSP00000181839,ENSP00000216780,ENSP00000234420,ENSP00000244571,ENSP00000253023,ENSP00000254928,ENSP00000262375,ENSP00000263063,ENSP00000265148,ENSP00000285737,ENSP00000295633,ENSP00000296474,ENSP00000296805,ENSP00000300283,ENSP00000304802,ENSP00000307705,ENSP00000309591,ENSP00000315118,ENSP00000322450,ENSP00000332340,ENSP00000342434,ENSP00000346921,ENSP00000352645,ENSP00000358060…	AARS2,ACBD5,ADCK4,AK2,AK3,AK4,ALDH6A1,ATP8B1,BAZ1B,CDK13,CENPE,CFTR,CKMT1B,DDX28,DNAJA3,DTYMK,ERAL1,FSTL1,GFM2,HIST1H1E,HMGCL,LONP2,MSH6,MST1R,MTPAP,NADK2,NDUFV1,OARD1,PCK2,PNPLA8,PRKACA,RFC1,SMC6,SUCLA2,TARS2,TYW1,UBE2J1,UBE2M
GO:0050145	nucleoside monophosphate kinase activity	3	25	0.0316	ENSP00000304802,ENSP00000346921,ENSP00000378743	AK2,AK4,DTYMK
GO:0043168	anion binding	45	2696	0.0319	ENSP00000003084,ENSP00000181839,ENSP00000205402,ENSP00000216780,ENSP00000220764,ENSP00000234420,ENSP00000244571,ENSP00000253023,ENSP00000254928,ENSP00000262375,ENSP00000263035,ENSP00000263063,ENSP00000264990,ENSP00000265148,ENSP00000285737,ENSP00000295633,ENSP00000296474,ENSP00000296805,ENSP00000300283,ENSP00000304802,ENSP00000307705,ENSP00000309591,ENSP00000312618,ENSP00000315118,ENSP00000322450…	AARS2,ACAD11,ACAD9,ACBD5,ADCK4,AK2,AK3,AK4,ALDH6A1,ATP8B1,BAZ1B,CDK13,CENPE,CFTR,CKMT1B,DDX28,DECR1,DHTKD1,DLD,DNAJA3,DTYMK,ERAL1,FSTL1,GFM2,GRB7,HIST1H1E,HMGCL,LONP2,MSH6,MST1R,MTHFD2,MTPAP,NADK2,NDUFV1,PCK2,PNPLA8,PRKACA,RCC1,RFC1,SMC6,SUCLA2,TARS2,TYW1,UBE2J1,UBE2M
GO:0005524	ATP binding	28	1462	0.0338	ENSP00000003084,ENSP00000181839,ENSP00000234420,ENSP00000244571,ENSP00000253023,ENSP00000262375,ENSP00000263063,ENSP00000265148,ENSP00000285737,ENSP00000296474,ENSP00000300283,ENSP00000304802,ENSP00000307705,ENSP00000309591,ENSP00000315118,ENSP00000332340,ENSP00000342434,ENSP00000346921,ENSP00000358060,ENSP00000367923,ENSP00000371230,ENSP00000371321,ENSP00000371362,ENSP00000378743,ENSP00000404092…	AARS2,ADCK4,AK2,AK3,AK4,ATP8B1,BAZ1B,CDK13,CENPE,CFTR,CKMT1B,DDX28,DNAJA3,DTYMK,HIST1H1E,LONP2,MSH6,MST1R,MTPAP,NADK2,PNPLA8,PRKACA,RFC1,SMC6,SUCLA2,TARS2,UBE2J1,UBE2M
GO:0016833	oxo-acid-lyase activity	2	7	0.0355	ENSP00000352645,ENSP00000363614	HMGCL,TYW1
GO:0031492	nucleosomal DNA binding	3	28	0.04	ENSP00000254810,ENSP00000355228,ENSP00000362937	H3F3B,HMGN2,RCC1
GO:0042910	xenobiotic transmembrane transporter activity	5	94	0.0401	ENSP00000281456,ENSP00000322020,ENSP00000370808,ENSP00000390722,ENSP00000457733	SLC25A17,SLC25A22,SLC25A24,SLC25A4,SLC25A6
GO:0016624	oxidoreductase activity, acting on the aldehyde or oxo group of donors, disulfide as acceptor	2	8	0.0423	ENSP00000263035,ENSP00000369134	DHTKD1,PDHA1
GO:0004017	adenylate kinase activity	2	9	0.0493	ENSP00000346921,ENSP00000378743	AK2,AK4
GO:0016620	oxidoreductase activity, acting on the aldehyde or oxo group of donors, NAD or NADP as acceptor	3	31	0.0493	ENSP00000258494,ENSP00000369134,ENSP00000450436	ALDH1L2,ALDH6A1,PDHA1

## Sheet: Components
#term ID	term description	observed gene count	background gene count	false discovery rate	matching proteins in your network (IDs)	matching proteins in your network (labels)
GO:0005739	mitochondrion	97	1531	6.41e-45	ENSP00000081029,ENSP00000168216,ENSP00000177742,ENSP00000184266,ENSP00000199706,ENSP00000205402,ENSP00000215375,ENSP00000216034,ENSP00000216780,ENSP00000220764,ENSP00000228318,ENSP00000230048,ENSP00000236980,ENSP00000244571,ENSP00000252102,ENSP00000252711,ENSP00000253457,ENSP00000254928,ENSP00000258383,ENSP00000258455,ENSP00000258494,ENSP00000258975,ENSP00000260102,ENSP00000262375,ENSP00000262570…	AARS2,ACAD11,ACAD9,ACOT13,ADCK4,AK2,AK3,AK4,ALDH1L2,ALDH6A1,ATP5C1,ATP5D,ATP5J,BDH1,C2orf47,CHCHD3,CKMT1B,COX6C,CYCS,DBT,DDX28,DECR1,DHTKD1,DLD,DLST,DNAJA3,DTYMK,EMC8,ERAL1,FASTKD2,FOXRED1,FXN,GADD45GIP1,GFM2,GPD2,HMGCL,HSD17B10,HSDL2,IBA57,ICT1,IDH3A,IDH3B,MALSU1,MDH2,MGME1,MRPL1,MRPL11,MRPL15,MRPL20,MRPL22,MRPL28,MRPL38,MRPL39,MRPL44,MRPL48,MRPS34,MRPS35,MRPS5,MRPS9,MTERF3,MTHFD2,MTIF3,MTPAP,NA…
GO:0005759	mitochondrial matrix	58	463	2.07e-39	ENSP00000081029,ENSP00000168216,ENSP00000177742,ENSP00000199706,ENSP00000205402,ENSP00000215375,ENSP00000216780,ENSP00000220764,ENSP00000236980,ENSP00000252711,ENSP00000254928,ENSP00000258383,ENSP00000258455,ENSP00000258494,ENSP00000260102,ENSP00000262375,ENSP00000263035,ENSP00000266544,ENSP00000272418,ENSP00000295079,ENSP00000296805,ENSP00000299518,ENSP00000301585,ENSP00000304802,ENSP00000305682…	AK3,AK4,ALDH1L2,ALDH6A1,ATP5C1,ATP5D,BDH1,C2orf47,DBT,DDX28,DECR1,DHTKD1,DLD,DLST,DNAJA3,DTYMK,ERAL1,FASTKD2,FXN,GADD45GIP1,GFM2,HMGCL,HSD17B10,IBA57,ICT1,IDH3A,IDH3B,MALSU1,MDH2,MRPL11,MRPL15,MRPL20,MRPL22,MRPL28,MRPL38,MRPL39,MRPL44,MRPL48,MRPS34,MRPS35,MRPS5,MRPS9,MTHFD2,NADK2,NDUFA10,NDUFA9,NDUFS2,PCK2,PDHA1,PIN4,PYCR1,PYCR2,SUCLA2,TARS2,TFAM,TFB1M,TSFM,VDAC2
GO:0005743	mitochondrial inner membrane	47	456	5.17e-28	ENSP00000081029,ENSP00000177742,ENSP00000184266,ENSP00000199706,ENSP00000215375,ENSP00000228318,ENSP00000252102,ENSP00000252711,ENSP00000254928,ENSP00000258383,ENSP00000258455,ENSP00000260102,ENSP00000262570,ENSP00000263578,ENSP00000264990,ENSP00000266544,ENSP00000268379,ENSP00000268668,ENSP00000272418,ENSP00000276689,ENSP00000281456,ENSP00000295079,ENSP00000296684,ENSP00000300283,ENSP00000301585…	ACAD11,ACAD9,ATP5C1,ATP5D,ATP5J,BDH1,C2orf47,CHCHD3,CKMT1B,COX6C,CYCS,ERAL1,FOXRED1,GPD2,ICT1,MRPL1,MRPL11,MRPL15,MRPL20,MRPL22,MRPL28,MRPL38,MRPL39,MRPL44,MRPL48,MRPS34,MRPS35,MRPS5,MRPS9,NDUFA10,NDUFA12,NDUFA2,NDUFA9,NDUFB10,NDUFB4,NDUFB9,NDUFS2,NDUFS4,NDUFV1,SLC25A17,SLC25A22,SLC25A24,SLC25A3,SLC25A4,SLC25A6,TIMM50,UQCRC2
GO:0005740	mitochondrial envelope	53	722	1.86e-25	ENSP00000081029,ENSP00000177742,ENSP00000184266,ENSP00000199706,ENSP00000215375,ENSP00000216034,ENSP00000228318,ENSP00000252102,ENSP00000252711,ENSP00000254928,ENSP00000258383,ENSP00000258455,ENSP00000260102,ENSP00000262570,ENSP00000263578,ENSP00000264990,ENSP00000266544,ENSP00000268379,ENSP00000268668,ENSP00000272418,ENSP00000276689,ENSP00000281456,ENSP00000287025,ENSP00000295079,ENSP00000296684…	ACAD11,ACAD9,ADCK4,AK2,ATP5C1,ATP5D,ATP5J,BDH1,C2orf47,CHCHD3,CKMT1B,COX6C,CYCS,DTYMK,ERAL1,FOXRED1,GPD2,ICT1,MRPL1,MRPL11,MRPL15,MRPL20,MRPL22,MRPL28,MRPL38,MRPL39,MRPL44,MRPL48,MRPS34,MRPS35,MRPS5,MRPS9,MTERF3,NDUFA10,NDUFA12,NDUFA2,NDUFA9,NDUFB10,NDUFB4,NDUFB9,NDUFS2,NDUFS4,NDUFV1,SLC25A17,SLC25A22,SLC25A24,SLC25A3,SLC25A4,SLC25A6,TIMM50,TOMM22,UQCRC2,VDAC2
GO:0031966	mitochondrial membrane	51	679	6.61e-25	ENSP00000081029,ENSP00000177742,ENSP00000184266,ENSP00000199706,ENSP00000215375,ENSP00000216034,ENSP00000228318,ENSP00000252102,ENSP00000252711,ENSP00000254928,ENSP00000258383,ENSP00000258455,ENSP00000260102,ENSP00000262570,ENSP00000263578,ENSP00000264990,ENSP00000266544,ENSP00000268379,ENSP00000268668,ENSP00000272418,ENSP00000276689,ENSP00000281456,ENSP00000287025,ENSP00000295079,ENSP00000296684…	ACAD11,ACAD9,ADCK4,ATP5C1,ATP5D,ATP5J,BDH1,C2orf47,CHCHD3,CKMT1B,COX6C,CYCS,ERAL1,FOXRED1,GPD2,ICT1,MRPL1,MRPL11,MRPL15,MRPL20,MRPL22,MRPL28,MRPL38,MRPL39,MRPL44,MRPL48,MRPS34,MRPS35,MRPS5,MRPS9,MTERF3,NDUFA10,NDUFA12,NDUFA2,NDUFA9,NDUFB10,NDUFB4,NDUFB9,NDUFS2,NDUFS4,NDUFV1,SLC25A17,SLC25A22,SLC25A24,SLC25A3,SLC25A4,SLC25A6,TIMM50,TOMM22,UQCRC2,VDAC2
GO:0098798	mitochondrial protein complex	35	251	1.08e-24	ENSP00000081029,ENSP00000168216,ENSP00000177742,ENSP00000184266,ENSP00000199706,ENSP00000215375,ENSP00000216034,ENSP00000252102,ENSP00000252711,ENSP00000258383,ENSP00000258455,ENSP00000260102,ENSP00000262570,ENSP00000263578,ENSP00000266544,ENSP00000268379,ENSP00000268668,ENSP00000272418,ENSP00000276689,ENSP00000296684,ENSP00000301585,ENSP00000305682,ENSP00000308275,ENSP00000308717,ENSP00000308897…	ATP5C1,ATP5D,ATP5J,CHCHD3,DBT,FOXRED1,HSD17B10,ICT1,MRPL11,MRPL15,MRPL20,MRPL22,MRPL28,MRPL38,MRPL39,MRPL44,MRPL48,MRPS34,MRPS35,MRPS5,MRPS9,NDUFA10,NDUFA12,NDUFA2,NDUFA9,NDUFB10,NDUFB4,NDUFB9,NDUFS2,NDUFS4,NDUFV1,SLC25A6,TIMM50,TOMM22,UQCRC2
GO:0043231	intracellular membrane-bounded organelle	185	10365	1.94e-21	ENSP00000003084,ENSP00000040738,ENSP00000081029,ENSP00000168216,ENSP00000177742,ENSP00000181839,ENSP00000184266,ENSP00000199706,ENSP00000205194,ENSP00000205402,ENSP00000215375,ENSP00000216034,ENSP00000216780,ENSP00000220764,ENSP00000226578,ENSP00000228318,ENSP00000228506,ENSP00000230048,ENSP00000234420,ENSP00000236980,ENSP00000243253,ENSP00000244537,ENSP00000244571,ENSP00000245046,ENSP00000248958…	AARS2,ACAD11,ACAD9,ACBD5,ACOT13,ADCK4,ADNP,AK2,AK3,AK4,ALDH1L2,ALDH6A1,ARPP19,ATP5C1,ATP5D,ATP5J,ATP8B1,BAZ1B,BDH1,BOD1L1,C2orf47,CC2D1B,CDK13,CDS1,CENPE,CERS2,CFTR,CHCHD3,CKMT1B,CNOT6L,COX6C,CPSF1,CTSV,CYCS,DAD1,DBT,DDX28,DECR1,DHTKD1,DLD,DLST,DMAP1,DNAJA3,DNAJB12,DNAJC1,DPF2,DTYMK,EED,EEF1D,EMC3,EMC7,EMC8,ENSG00000086848,ERAL1,EXOSC7,FASTKD2,FIP1L1,FOXRED1,FSTL1,FXN,GADD45GIP1,GATAD2A,GFM2,GPD2…
GO:0031967	organelle envelope	58	1146	1.32e-20	ENSP00000081029,ENSP00000177742,ENSP00000184266,ENSP00000199706,ENSP00000215375,ENSP00000216034,ENSP00000228318,ENSP00000252102,ENSP00000252711,ENSP00000254928,ENSP00000257181,ENSP00000258383,ENSP00000258455,ENSP00000260102,ENSP00000262570,ENSP00000263578,ENSP00000264990,ENSP00000266544,ENSP00000268379,ENSP00000268668,ENSP00000271688,ENSP00000272418,ENSP00000276689,ENSP00000281456,ENSP00000287025…	ACAD11,ACAD9,ADCK4,AK2,ATP5C1,ATP5D,ATP5J,BDH1,C2orf47,CERS2,CHCHD3,CKMT1B,COX6C,CYCS,DNAJB12,DNAJC1,DTYMK,ERAL1,FOXRED1,GPD2,ICT1,MRPL1,MRPL11,MRPL15,MRPL20,MRPL22,MRPL28,MRPL38,MRPL39,MRPL44,MRPL48,MRPS34,MRPS35,MRPS5,MRPS9,MTERF3,NDUFA10,NDUFA12,NDUFA2,NDUFA9,NDUFB10,NDUFB4,NDUFB9,NDUFS2,NDUFS4,NDUFV1,PRPF38A,RCC1,SLC25A17,SLC25A22,SLC25A24,SLC25A3,SLC25A4,SLC25A6,TIMM50,TOMM22,UQCRC2,VDAC2
GO:0043229	intracellular organelle	196	12193	1.49e-18	ENSP00000003084,ENSP00000040738,ENSP00000081029,ENSP00000168216,ENSP00000177742,ENSP00000181839,ENSP00000184266,ENSP00000199706,ENSP00000205194,ENSP00000205402,ENSP00000215375,ENSP00000216034,ENSP00000216780,ENSP00000220764,ENSP00000226578,ENSP00000228318,ENSP00000228506,ENSP00000230048,ENSP00000234420,ENSP00000236980,ENSP00000243253,ENSP00000244537,ENSP00000244571,ENSP00000245046,ENSP00000246662…	AARS2,ACAD11,ACAD9,ACBD5,ACOT13,ADCK4,ADNP,AK2,AK3,AK4,ALDH1L2,ALDH6A1,ARPP19,ATP5C1,ATP5D,ATP5J,ATP8B1,BAZ1B,BDH1,BOD1L1,C2orf47,CC2D1B,CDK13,CDS1,CENPE,CEP44,CERS2,CFTR,CHCHD3,CKMT1B,CNOT6L,COX6C,CPSF1,CTSV,CYCS,DAD1,DBT,DDX28,DECR1,DHTKD1,DLD,DLST,DMAP1,DNAJA3,DNAJB12,DNAJC1,DPF2,DTYMK,EED,EEF1D,EMC3,EMC7,EMC8,ENSG00000086848,ERAL1,EXOSC7,FASTKD2,FIP1L1,FOXRED1,FSTL1,FXN,GADD45GIP1,GATAD2A,GFM…
GO:0043227	membrane-bounded organelle	188	11244	1.89e-18	ENSP00000003084,ENSP00000040738,ENSP00000081029,ENSP00000168216,ENSP00000177742,ENSP00000181839,ENSP00000184266,ENSP00000199706,ENSP00000205194,ENSP00000205402,ENSP00000215375,ENSP00000216034,ENSP00000216780,ENSP00000220764,ENSP00000226578,ENSP00000228318,ENSP00000228506,ENSP00000230048,ENSP00000234420,ENSP00000236980,ENSP00000243253,ENSP00000244537,ENSP00000244571,ENSP00000245046,ENSP00000248958…	AARS2,ACAD11,ACAD9,ACBD5,ACOT13,ADCK4,ADNP,AK2,AK3,AK4,ALDH1L2,ALDH6A1,ARPP19,ATP5C1,ATP5D,ATP5J,ATP8B1,BAZ1B,BDH1,BOD1L1,C2orf47,CC2D1B,CDK13,CDS1,CENPE,CERS2,CFTR,CHCHD3,CKMT1B,CNOT6L,COX6C,CPSF1,CTSV,CYCS,DAD1,DBT,DDX28,DECR1,DHTKD1,DLD,DLST,DMAP1,DNAJA3,DNAJB12,DNAJC1,DPF2,DTYMK,EED,EEF1D,EMC3,EMC7,EMC8,ENSG00000086848,ERAL1,EXOSC7,FASTKD2,FIP1L1,FOXRED1,FSTL1,FXN,GADD45GIP1,GATAD2A,GFM2,GPD2…
GO:0070013	intracellular organelle lumen	119	5162	5.86e-17	ENSP00000040738,ENSP00000081029,ENSP00000168216,ENSP00000177742,ENSP00000181839,ENSP00000199706,ENSP00000205402,ENSP00000215375,ENSP00000216780,ENSP00000220764,ENSP00000226578,ENSP00000234420,ENSP00000236980,ENSP00000244537,ENSP00000248958,ENSP00000252244,ENSP00000252711,ENSP00000253023,ENSP00000254810,ENSP00000254928,ENSP00000257181,ENSP00000257789,ENSP00000258383,ENSP00000258455,ENSP00000258494…	ACBD5,AK2,AK3,AK4,ALDH1L2,ALDH6A1,ARPP19,ATP5C1,ATP5D,BAZ1B,BDH1,BOD1L1,C2orf47,CC2D1B,CDK13,CENPE,CPSF1,CTSV,CYCS,DBT,DDX28,DECR1,DHTKD1,DLD,DLST,DMAP1,DNAJA3,DPF2,DTYMK,EED,EEF1D,ERAL1,EXOSC7,FASTKD2,FIP1L1,FSTL1,FXN,GADD45GIP1,GATAD2A,GFM2,GPR107,H2AFV,H3F3B,HIST1H1E,HIST1H4F,HIST2H2AC,HIST2H2BE,HIST2H2BF,HMGA1,HMGCL,HNRNPDL,HSD17B10,IBA57,ICT1,IDH3A,IDH3B,KRT1,LONP2,MAD2L1,MALSU1,MANBA,MAP1S,…
GO:0005737	cytoplasm	181	11238	2.15e-14	ENSP00000003084,ENSP00000081029,ENSP00000168216,ENSP00000177742,ENSP00000181839,ENSP00000184266,ENSP00000199706,ENSP00000205402,ENSP00000215375,ENSP00000216034,ENSP00000216780,ENSP00000220764,ENSP00000226578,ENSP00000228318,ENSP00000228506,ENSP00000230048,ENSP00000234420,ENSP00000236980,ENSP00000243253,ENSP00000244571,ENSP00000245046,ENSP00000246662,ENSP00000248958,ENSP00000250498,ENSP00000252102…	AARS2,ACAD11,ACAD9,ACBD5,ACOT13,ADCK4,ADNP,AK2,AK3,AK4,ALDH1L2,ALDH6A1,ARPP19,ATP5C1,ATP5D,ATP5J,ATP8B1,BDH1,C2orf47,CDK13,CDS1,CENPE,CEP44,CERS2,CFTR,CHCHD3,CKMT1B,CNOT6L,COX6C,CTSV,CYCS,DAD1,DBT,DDX28,DECR1,DHTKD1,DLD,DLST,DMAP1,DNAJA3,DNAJB12,DNAJC1,DNAJC16,DPF2,DTYMK,EED,EEF1B2,EEF1D,EEF1G,EMC3,EMC7,EMC8,ENSG00000086848,ERAL1,ERH,EXOSC7,FAIM,FASTKD2,FOXRED1,FSTL1,FXN,GADD45GIP1,GFM2,GPD2,GPR1…
GO:1990204	oxidoreductase complex	18	103	3.07e-14	ENSP00000184266,ENSP00000205402,ENSP00000252102,ENSP00000252711,ENSP00000263035,ENSP00000263578,ENSP00000266544,ENSP00000268379,ENSP00000268668,ENSP00000276689,ENSP00000296684,ENSP00000308610,ENSP00000322450,ENSP00000330737,ENSP00000335304,ENSP00000356972,ENSP00000359151,ENSP00000369134	DBT,DHTKD1,DLD,DLST,FOXRED1,GPD2,NDUFA10,NDUFA12,NDUFA2,NDUFA9,NDUFB10,NDUFB4,NDUFB9,NDUFS2,NDUFS4,NDUFV1,PDHA1,UQCRC2
GO:0005622	intracellular	204	14286	2.11e-13	ENSP00000003084,ENSP00000040738,ENSP00000081029,ENSP00000168216,ENSP00000177742,ENSP00000181839,ENSP00000184266,ENSP00000199706,ENSP00000205194,ENSP00000205402,ENSP00000215375,ENSP00000216034,ENSP00000216780,ENSP00000220764,ENSP00000226578,ENSP00000228318,ENSP00000228506,ENSP00000230048,ENSP00000234420,ENSP00000236980,ENSP00000243253,ENSP00000244537,ENSP00000244571,ENSP00000245046,ENSP00000246662…	AARS2,ACAD11,ACAD9,ACBD5,ACOT13,ADCK4,ADNP,AK2,AK3,AK4,ALDH1L2,ALDH6A1,ARPP19,ATP5C1,ATP5D,ATP5J,ATP8B1,BAZ1B,BDH1,BOD1L1,C2orf47,CC2D1B,CDK13,CDS1,CENPE,CEP44,CERS2,CFTR,CHCHD3,CKMT1B,CNOT6L,COX6C,CPSF1,CTSV,CYCS,DAD1,DBT,DDX28,DECR1,DHTKD1,DLD,DLST,DMAP1,DNAJA3,DNAJB12,DNAJC1,DNAJC16,DPF2,DTYMK,EED,EEF1B2,EEF1D,EEF1G,EMC3,EMC7,EMC8,ENSG00000086848,ERAL1,ERH,EXOSC7,FAIM,FASTKD2,FIP1L1,FOXRED1,FS…
GO:0098800	inner mitochondrial membrane protein complex	18	128	8.09e-13	ENSP00000184266,ENSP00000215375,ENSP00000252102,ENSP00000252711,ENSP00000262570,ENSP00000263578,ENSP00000266544,ENSP00000268379,ENSP00000268668,ENSP00000276689,ENSP00000296684,ENSP00000322450,ENSP00000330737,ENSP00000349142,ENSP00000356972,ENSP00000370808,ENSP00000389649,ENSP00000445806	ATP5C1,ATP5D,ATP5J,CHCHD3,FOXRED1,NDUFA10,NDUFA12,NDUFA2,NDUFA9,NDUFB10,NDUFB4,NDUFB9,NDUFS2,NDUFS4,NDUFV1,SLC25A6,TIMM50,UQCRC2
GO:0031090	organelle membrane	82	3337	1.09e-11	ENSP00000003084,ENSP00000081029,ENSP00000177742,ENSP00000184266,ENSP00000199706,ENSP00000215375,ENSP00000216034,ENSP00000226578,ENSP00000228318,ENSP00000228506,ENSP00000243253,ENSP00000245046,ENSP00000248958,ENSP00000250498,ENSP00000252102,ENSP00000252711,ENSP00000253457,ENSP00000254928,ENSP00000256545,ENSP00000257181,ENSP00000258383,ENSP00000258455,ENSP00000260102,ENSP00000262213,ENSP00000262291…	ACAD11,ACAD9,ACBD5,ADCK4,ATP5C1,ATP5D,ATP5J,BDH1,C2orf47,CDS1,CERS2,CFTR,CHCHD3,CKMT1B,COX6C,CYCS,DAD1,DNAJB12,DNAJC1,EMC3,EMC7,EMC8,ENSG00000086848,ERAL1,FOXRED1,GPD2,ICT1,LPCAT1,MANBA,MLEC,MRPL1,MRPL11,MRPL15,MRPL20,MRPL22,MRPL28,MRPL38,MRPL39,MRPL44,MRPL48,MRPS34,MRPS35,MRPS5,MRPS9,MTERF3,NDUFA10,NDUFA12,NDUFA2,NDUFA9,NDUFB10,NDUFB4,NDUFB9,NDUFS2,NDUFS4,NDUFV1,NOTCH1,PEX13,PNPLA8,PRAF2,PRPF38A…
GO:0005761	mitochondrial ribosome	14	86	9.28e-11	ENSP00000081029,ENSP00000177742,ENSP00000199706,ENSP00000258383,ENSP00000258455,ENSP00000260102,ENSP00000272418,ENSP00000301585,ENSP00000305682,ENSP00000308275,ENSP00000308717,ENSP00000308897,ENSP00000341082,ENSP00000431040	ICT1,MRPL11,MRPL15,MRPL20,MRPL22,MRPL28,MRPL38,MRPL39,MRPL44,MRPL48,MRPS34,MRPS35,MRPS5,MRPS9
GO:0005747	mitochondrial respiratory chain complex I	11	46	4.63e-10	ENSP00000184266,ENSP00000252102,ENSP00000252711,ENSP00000263578,ENSP00000266544,ENSP00000268668,ENSP00000276689,ENSP00000296684,ENSP00000322450,ENSP00000330737,ENSP00000356972	FOXRED1,NDUFA10,NDUFA12,NDUFA2,NDUFA9,NDUFB10,NDUFB4,NDUFB9,NDUFS2,NDUFS4,NDUFV1
GO:0070469	respirasome	13	93	2.45e-09	ENSP00000184266,ENSP00000252102,ENSP00000252711,ENSP00000263578,ENSP00000266544,ENSP00000268379,ENSP00000268668,ENSP00000276689,ENSP00000296684,ENSP00000307786,ENSP00000322450,ENSP00000330737,ENSP00000356972	CYCS,FOXRED1,NDUFA10,NDUFA12,NDUFA2,NDUFA9,NDUFB10,NDUFB4,NDUFB9,NDUFS2,NDUFS4,NDUFV1,UQCRC2
GO:0032991	protein-containing complex	96	4792	4.5e-09	ENSP00000003084,ENSP00000081029,ENSP00000168216,ENSP00000177742,ENSP00000181839,ENSP00000184266,ENSP00000199706,ENSP00000205402,ENSP00000215375,ENSP00000216034,ENSP00000234420,ENSP00000236980,ENSP00000244537,ENSP00000245046,ENSP00000248958,ENSP00000250498,ENSP00000252102,ENSP00000252711,ENSP00000253457,ENSP00000254810,ENSP00000256545,ENSP00000257181,ENSP00000257789,ENSP00000258383,ENSP00000258455…	ATP5C1,ATP5D,ATP5J,CDK13,CENPE,CFTR,CHCHD3,CNOT6L,CPSF1,CYCS,DAD1,DBT,DDX28,DHTKD1,DLD,DLST,DMAP1,EED,EEF1B2,EEF1D,EMC3,EMC7,EMC8,ERH,EXOSC7,FASTKD2,FIP1L1,FOXRED1,FXN,GADD45GIP1,GATAD2A,GPD2,GRB7,H2AFV,H3F3B,HIST1H1E,HIST1H4F,HIST2H2AC,HIST2H2BE,HIST2H2BF,HMGA1,HNRNPDL,HSD17B10,ICT1,MAD2L1,MRPL1,MRPL11,MRPL15,MRPL20,MRPL22,MRPL28,MRPL38,MRPL39,MRPL44,MRPL48,MRPS34,MRPS35,MRPS5,MRPS9,MSH6,NDUFA10…
GO:0098803	respiratory chain complex	12	79	4.98e-09	ENSP00000184266,ENSP00000252102,ENSP00000252711,ENSP00000263578,ENSP00000266544,ENSP00000268379,ENSP00000268668,ENSP00000276689,ENSP00000296684,ENSP00000322450,ENSP00000330737,ENSP00000356972	FOXRED1,NDUFA10,NDUFA12,NDUFA2,NDUFA9,NDUFB10,NDUFB4,NDUFB9,NDUFS2,NDUFS4,NDUFV1,UQCRC2
GO:0044391	ribosomal subunit	15	152	7.35e-09	ENSP00000081029,ENSP00000177742,ENSP00000199706,ENSP00000258383,ENSP00000258455,ENSP00000260102,ENSP00000272418,ENSP00000301585,ENSP00000305682,ENSP00000308275,ENSP00000308717,ENSP00000308897,ENSP00000315017,ENSP00000341082,ENSP00000431040	ICT1,MRPL1,MRPL11,MRPL15,MRPL20,MRPL22,MRPL28,MRPL38,MRPL39,MRPL44,MRPL48,MRPS34,MRPS35,MRPS5,MRPS9
GO:0005746	mitochondrial respirasome	12	85	9.94e-09	ENSP00000184266,ENSP00000252102,ENSP00000252711,ENSP00000263578,ENSP00000266544,ENSP00000268379,ENSP00000268668,ENSP00000276689,ENSP00000296684,ENSP00000322450,ENSP00000330737,ENSP00000356972	FOXRED1,NDUFA10,NDUFA12,NDUFA2,NDUFA9,NDUFB10,NDUFB4,NDUFB9,NDUFS2,NDUFS4,NDUFV1,UQCRC2
GO:0005762	mitochondrial large ribosomal subunit	10	53	2.14e-08	ENSP00000199706,ENSP00000258383,ENSP00000260102,ENSP00000301585,ENSP00000305682,ENSP00000308275,ENSP00000308717,ENSP00000308897,ENSP00000341082,ENSP00000431040	ICT1,MRPL11,MRPL15,MRPL20,MRPL22,MRPL28,MRPL38,MRPL39,MRPL44,MRPL48
GO:0005840	ribosome	16	201	3.1e-08	ENSP00000081029,ENSP00000177742,ENSP00000199706,ENSP00000258383,ENSP00000258455,ENSP00000260102,ENSP00000272418,ENSP00000301585,ENSP00000305682,ENSP00000308275,ENSP00000308717,ENSP00000308897,ENSP00000315017,ENSP00000323065,ENSP00000341082,ENSP00000431040	GADD45GIP1,ICT1,MRPL1,MRPL11,MRPL15,MRPL20,MRPL22,MRPL28,MRPL38,MRPL39,MRPL44,MRPL48,MRPS34,MRPS35,MRPS5,MRPS9
GO:0015934	large ribosomal subunit	11	87	1.3e-07	ENSP00000199706,ENSP00000258383,ENSP00000260102,ENSP00000301585,ENSP00000305682,ENSP00000308275,ENSP00000308717,ENSP00000308897,ENSP00000315017,ENSP00000341082,ENSP00000431040	ICT1,MRPL1,MRPL11,MRPL15,MRPL20,MRPL22,MRPL28,MRPL38,MRPL39,MRPL44,MRPL48
GO:0043209	myelin sheath	13	157	6.19e-07	ENSP00000205402,ENSP00000228318,ENSP00000252711,ENSP00000268379,ENSP00000281456,ENSP00000299518,ENSP00000317714,ENSP00000327070,ENSP00000335304,ENSP00000349142,ENSP00000361635,ENSP00000367923,ENSP00000369134	ATP5C1,DLD,DLST,IDH3A,MDH2,NDUFA10,PDHA1,SLC25A3,SLC25A4,STX4,SUCLA2,UQCRC2,VDAC2
GO:0005623	cell	206	16271	5.08e-06	ENSP00000003084,ENSP00000040738,ENSP00000081029,ENSP00000168216,ENSP00000177742,ENSP00000181839,ENSP00000184266,ENSP00000199706,ENSP00000205194,ENSP00000205402,ENSP00000215375,ENSP00000216034,ENSP00000216780,ENSP00000220764,ENSP00000226578,ENSP00000228318,ENSP00000228506,ENSP00000230048,ENSP00000234420,ENSP00000236980,ENSP00000243253,ENSP00000244537,ENSP00000244571,ENSP00000245046,ENSP00000246662…	AARS2,ACAD11,ACAD9,ACBD5,ACOT13,ADCK4,ADNP,AK2,AK3,AK4,ALDH1L2,ALDH6A1,ARPP19,ATP5C1,ATP5D,ATP5J,ATP8B1,BAZ1B,BDH1,BOD1L1,C2orf47,CC2D1B,CDK13,CDS1,CENPE,CEP44,CERS2,CFTR,CHCHD3,CKMT1B,CNOT6L,COX6C,CPSF1,CTSV,CYCS,DAD1,DBT,DDX28,DECR1,DHTKD1,DLD,DLST,DMAP1,DNAJA3,DNAJB12,DNAJC1,DNAJC16,DPF2,DTYMK,EED,EEF1B2,EEF1D,EEF1G,EMC3,EMC7,EMC8,ENSG00000026036,ENSG00000086848,ERAL1,ERH,EXOSC7,FAIM,FASTKD2,F…
GO:0042645	mitochondrial nucleoid	7	43	1.31e-05	ENSP00000236980,ENSP00000262375,ENSP00000332340,ENSP00000356134,ENSP00000359151,ENSP00000361635,ENSP00000420588	DBT,DDX28,DNAJA3,FASTKD2,TFAM,TFB1M,VDAC2
GO:0043232	intracellular non-membrane-bounded organelle	75	4005	1.47e-05	ENSP00000040738,ENSP00000081029,ENSP00000177742,ENSP00000181839,ENSP00000199706,ENSP00000230048,ENSP00000234420,ENSP00000236980,ENSP00000244537,ENSP00000246662,ENSP00000252244,ENSP00000254810,ENSP00000257789,ENSP00000258383,ENSP00000258455,ENSP00000260102,ENSP00000261708,ENSP00000262291,ENSP00000262375,ENSP00000263360,ENSP00000265148,ENSP00000265564,ENSP00000269576,ENSP00000272418,ENSP00000283415…	ACOT13,BAZ1B,BOD1L1,CDK13,CENPE,CEP44,CTSV,DBT,DDX28,DMAP1,DNAJA3,DPF2,EED,EEF1D,EXOSC7,FASTKD2,GADD45GIP1,GATAD2A,GRB7,H2AFV,H3F3B,HIST1H1E,HIST1H4F,HIST2H2AC,HIST2H2BE,HIST2H2BF,HMGA1,HMGN2,ICT1,KRT1,KRT10,KRT16,KRT2,KRT6A,KRT9,LPCAT1,MAD2L1,MAP1S,MRPL1,MRPL11,MRPL15,MRPL20,MRPL22,MRPL28,MRPL38,MRPL39,MRPL44,MRPL48,MRPS34,MRPS35,MRPS5,MRPS9,MSH6,MST1R,NCOA5,NKRF,ORC3,PDHA1,PIN4,PRKACA,RCC1,RFC1…
GO:1990904	ribonucleoprotein complex	25	770	2.47e-05	ENSP00000081029,ENSP00000168216,ENSP00000177742,ENSP00000199706,ENSP00000236980,ENSP00000257181,ENSP00000258383,ENSP00000258455,ENSP00000260102,ENSP00000261708,ENSP00000272418,ENSP00000301585,ENSP00000305682,ENSP00000308275,ENSP00000308717,ENSP00000308897,ENSP00000315017,ENSP00000323065,ENSP00000332340,ENSP00000341082,ENSP00000350954,ENSP00000362773,ENSP00000403459,ENSP00000431040,ENSP00000483254	DDX28,FASTKD2,GADD45GIP1,GRB7,HNRNPDL,HSD17B10,ICT1,MRPL1,MRPL11,MRPL15,MRPL20,MRPL22,MRPL28,MRPL38,MRPL39,MRPL44,MRPL48,MRPS34,MRPS35,MRPS5,MRPS9,PIN4,PRPF38A,UTP6,WDR37
GO:0098796	membrane protein complex	30	1047	2.67e-05	ENSP00000003084,ENSP00000184266,ENSP00000215375,ENSP00000216034,ENSP00000245046,ENSP00000250498,ENSP00000252102,ENSP00000252711,ENSP00000253457,ENSP00000256545,ENSP00000262570,ENSP00000263578,ENSP00000266544,ENSP00000268379,ENSP00000268668,ENSP00000276689,ENSP00000295770,ENSP00000296684,ENSP00000309591,ENSP00000317714,ENSP00000322450,ENSP00000330737,ENSP00000337053,ENSP00000349142,ENSP00000356972…	ATP5C1,ATP5D,ATP5J,CFTR,CHCHD3,DAD1,EMC3,EMC7,EMC8,FOXRED1,NDUFA10,NDUFA12,NDUFA2,NDUFA9,NDUFB10,NDUFB4,NDUFB9,NDUFS2,NDUFS4,NDUFV1,PRKACA,SEL1L,SLC25A6,STT3B,STX4,TIMM50,TOMM22,UQCRC2,VDAC2,VIMP
GO:1902494	catalytic complex	34	1295	3.45e-05	ENSP00000168216,ENSP00000181839,ENSP00000184266,ENSP00000205402,ENSP00000250498,ENSP00000252102,ENSP00000252711,ENSP00000263035,ENSP00000263360,ENSP00000263578,ENSP00000265564,ENSP00000266544,ENSP00000268379,ENSP00000268668,ENSP00000276689,ENSP00000295770,ENSP00000296684,ENSP00000307786,ENSP00000308610,ENSP00000309591,ENSP00000315017,ENSP00000316578,ENSP00000322450,ENSP00000323967,ENSP00000330737…	CDK13,CYCS,DAD1,DBT,DHTKD1,DLD,DLST,DMAP1,EED,ERH,EXOSC7,FOXRED1,GATAD2A,GPD2,HSD17B10,MRPL1,NDUFA10,NDUFA12,NDUFA2,NDUFA9,NDUFB10,NDUFB4,NDUFB9,NDUFS2,NDUFS4,NDUFV1,PDHA1,PRKACA,SEL1L,SMARCE1,SMC6,STT3B,SUZ12,UQCRC2
GO:0045240	dihydrolipoyl dehydrogenase complex	4	10	0.00012	ENSP00000205402,ENSP00000263035,ENSP00000335304,ENSP00000359151	DBT,DHTKD1,DLD,DLST
GO:0005777	peroxisome	9	127	0.00018	ENSP00000264990,ENSP00000285737,ENSP00000295030,ENSP00000363614,ENSP00000379568,ENSP00000380251,ENSP00000381785,ENSP00000390722,ENSP00000410804	ACAD11,ACBD5,HMGCL,HSDL2,LONP2,NUDT19,PEX13,PNPLA8,SLC25A17
GO:0045252	oxoglutarate dehydrogenase complex	3	6	0.0009	ENSP00000205402,ENSP00000263035,ENSP00000335304	DHTKD1,DLD,DLST
GO:0000785	chromatin	16	489	0.0013	ENSP00000234420,ENSP00000244537,ENSP00000254810,ENSP00000263360,ENSP00000307705,ENSP00000308405,ENSP00000316578,ENSP00000323967,ENSP00000332194,ENSP00000342434,ENSP00000353463,ENSP00000355228,ENSP00000358151,ENSP00000362937,ENSP00000399888,ENSP00000445831	BAZ1B,EED,GATAD2A,H2AFV,H3F3B,HIST1H1E,HIST1H4F,HIST2H2AC,HIST2H2BE,HIST2H2BF,HMGA1,HMGN2,MSH6,RCC1,SMARCE1,SUZ12
GO:0005694	chromosome	24	950	0.0016	ENSP00000040738,ENSP00000181839,ENSP00000234420,ENSP00000244537,ENSP00000254810,ENSP00000257789,ENSP00000263360,ENSP00000265148,ENSP00000296509,ENSP00000307705,ENSP00000308405,ENSP00000316578,ENSP00000323967,ENSP00000332194,ENSP00000342434,ENSP00000353463,ENSP00000355228,ENSP00000358151,ENSP00000361363,ENSP00000362937,ENSP00000371321,ENSP00000399888,ENSP00000404092,ENSP00000445831	BAZ1B,BOD1L1,CDK13,CENPE,DMAP1,EED,GATAD2A,H2AFV,H3F3B,HIST1H1E,HIST1H4F,HIST2H2AC,HIST2H2BE,HIST2H2BF,HMGA1,HMGN2,MAD2L1,MSH6,ORC3,RCC1,RFC1,SMARCE1,SMC6,SUZ12
GO:0000786	nucleosome	7	106	0.0021	ENSP00000244537,ENSP00000254810,ENSP00000307705,ENSP00000308405,ENSP00000332194,ENSP00000358151,ENSP00000445831	H2AFV,H3F3B,HIST1H1E,HIST1H4F,HIST2H2AC,HIST2H2BE,HIST2H2BF
GO:0032993	protein-DNA complex	9	188	0.0027	ENSP00000244537,ENSP00000254810,ENSP00000257789,ENSP00000307705,ENSP00000308405,ENSP00000316578,ENSP00000332194,ENSP00000358151,ENSP00000445831	H2AFV,H3F3B,HIST1H1E,HIST1H4F,HIST2H2AC,HIST2H2BE,HIST2H2BF,ORC3,SUZ12
GO:0072546	ER membrane protein complex	3	10	0.0027	ENSP00000245046,ENSP00000253457,ENSP00000256545	EMC3,EMC7,EMC8
GO:0000803	sex chromosome	4	29	0.0034	ENSP00000254810,ENSP00000263360,ENSP00000316578,ENSP00000404092	EED,H3F3B,SMC6,SUZ12
GO:0005763	mitochondrial small ribosomal subunit	4	29	0.0034	ENSP00000081029,ENSP00000177742,ENSP00000258455,ENSP00000272418	MRPS34,MRPS35,MRPS5,MRPS9
GO:0031301	integral component of organelle membrane	11	310	0.0064	ENSP00000216034,ENSP00000243253,ENSP00000245046,ENSP00000253457,ENSP00000256545,ENSP00000262570,ENSP00000281456,ENSP00000295030,ENSP00000345575,ENSP00000381282,ENSP00000390722	CHCHD3,DNAJB12,EMC3,EMC7,EMC8,PEX13,SEC61A1,SLC25A17,SLC25A4,TOMM22,VIMP
GO:0000792	heterochromatin	5	71	0.0104	ENSP00000263360,ENSP00000307705,ENSP00000316578,ENSP00000342434,ENSP00000399888	BAZ1B,EED,HIST1H1E,HMGA1,SUZ12
GO:0000790	nuclear chromatin	11	333	0.0106	ENSP00000234420,ENSP00000244537,ENSP00000254810,ENSP00000263360,ENSP00000307705,ENSP00000308405,ENSP00000316578,ENSP00000323967,ENSP00000332194,ENSP00000353463,ENSP00000362937	EED,GATAD2A,H2AFV,H3F3B,HIST1H1E,HIST1H4F,HIST2H2AC,MSH6,RCC1,SMARCE1,SUZ12
GO:0005853	eukaryotic translation elongation factor 1 complex	2	4	0.0116	ENSP00000376056,ENSP00000410059	EEF1B2,EEF1D
GO:0005753	mitochondrial proton-transporting ATP synthase complex	3	21	0.0146	ENSP00000215375,ENSP00000349142,ENSP00000389649	ATP5C1,ATP5D,ATP5J
GO:0000275	mitochondrial proton-transporting ATP synthase complex, catalytic core F(1)	2	5	0.0157	ENSP00000215375,ENSP00000349142	ATP5C1,ATP5D
GO:0005789	endoplasmic reticulum membrane	22	1022	0.0171	ENSP00000003084,ENSP00000228506,ENSP00000243253,ENSP00000245046,ENSP00000248958,ENSP00000250498,ENSP00000253457,ENSP00000256545,ENSP00000262213,ENSP00000271688,ENSP00000277541,ENSP00000283415,ENSP00000295770,ENSP00000295887,ENSP00000337053,ENSP00000345575,ENSP00000366179,ENSP00000370648,ENSP00000381282,ENSP00000410804,ENSP00000451261,ENSP00000482396	CDS1,CERS2,CFTR,DAD1,DNAJB12,DNAJC1,EMC3,EMC7,EMC8,ENSG00000086848,LPCAT1,MLEC,NOTCH1,PNPLA8,RDH14,SDF2L1,SEC61A1,SEL1L,STT3B,TRAM1,UBE2J1,VIMP
GO:0098827	endoplasmic reticulum subcompartment	22	1025	0.0174	ENSP00000003084,ENSP00000228506,ENSP00000243253,ENSP00000245046,ENSP00000248958,ENSP00000250498,ENSP00000253457,ENSP00000256545,ENSP00000262213,ENSP00000271688,ENSP00000277541,ENSP00000283415,ENSP00000295770,ENSP00000295887,ENSP00000337053,ENSP00000345575,ENSP00000366179,ENSP00000370648,ENSP00000381282,ENSP00000410804,ENSP00000451261,ENSP00000482396	CDS1,CERS2,CFTR,DAD1,DNAJB12,DNAJC1,EMC3,EMC7,EMC8,ENSG00000086848,LPCAT1,MLEC,NOTCH1,PNPLA8,RDH14,SDF2L1,SEC61A1,SEL1L,STT3B,TRAM1,UBE2J1,VIMP
GO:0001739	sex chromatin	2	6	0.019	ENSP00000263360,ENSP00000316578	EED,SUZ12
GO:0005778	peroxisomal membrane	4	51	0.019	ENSP00000295030,ENSP00000379568,ENSP00000390722,ENSP00000410804	ACBD5,PEX13,PNPLA8,SLC25A17
GO:0045254	pyruvate dehydrogenase complex	2	8	0.0288	ENSP00000205402,ENSP00000369134	DLD,PDHA1
GO:0036513	Derlin-1 retrotranslocation complex	2	9	0.0345	ENSP00000337053,ENSP00000381282	SEL1L,VIMP
GO:0030176	integral component of endoplasmic reticulum membrane	6	147	0.0386	ENSP00000243253,ENSP00000245046,ENSP00000253457,ENSP00000256545,ENSP00000345575,ENSP00000381282	DNAJB12,EMC3,EMC7,EMC8,SEC61A1,VIMP
GO:0005720	nuclear heterochromatin	3	35	0.0447	ENSP00000263360,ENSP00000307705,ENSP00000316578	EED,HIST1H1E,SUZ12
GO:0005744	TIM23 mitochondrial import inner membrane translocase complex	2	11	0.0453	ENSP00000370808,ENSP00000445806	SLC25A6,TIMM50
GO:0035098	ESC/E(Z) complex	2	11	0.0453	ENSP00000263360,ENSP00000316578	EED,SUZ12
GO:0031981	nuclear lumen	60	4030	0.0464	ENSP00000040738,ENSP00000181839,ENSP00000205402,ENSP00000220764,ENSP00000234420,ENSP00000244537,ENSP00000253023,ENSP00000254810,ENSP00000257181,ENSP00000257789,ENSP00000258455,ENSP00000261708,ENSP00000262291,ENSP00000263360,ENSP00000265148,ENSP00000265564,ENSP00000266544,ENSP00000268379,ENSP00000277541,ENSP00000287025,ENSP00000296509,ENSP00000298532,ENSP00000307705,ENSP00000308405,ENSP00000309591…	ACBD5,ALDH6A1,ARPP19,BAZ1B,BDH1,BOD1L1,CC2D1B,CDK13,CENPE,CPSF1,CTSV,DDX28,DECR1,DLD,DMAP1,DPF2,EED,EEF1D,EXOSC7,FIP1L1,GATAD2A,GPR107,H2AFV,H3F3B,HIST1H1E,HIST1H4F,HIST2H2AC,HIST2H2BE,HIST2H2BF,HMGA1,HNRNPDL,MAD2L1,MAP1S,MRPL1,MRPS9,MSH6,MTERF3,NDUFA9,NDUFS2,NFU1,NKRF,NOTCH1,ORC3,PDHA1,PIN4,PRKACA,PRPF38A,RCC1,RFC1,RYBP,SMARCE1,SMC6,SNAPC4,SUZ12,TIMM50,UBE2M,UQCRC2,UTP6,VMP1,WDR37

## Sheet: Pathways
#term ID	term description	observed gene count	background gene count	false discovery rate	matching proteins in your network (IDs)	matching proteins in your network (labels)
HSA-1428517	The citric acid (TCA) cycle and respiratory electron transport	25	173	9.55e-17	ENSP00000184266,ENSP00000205402,ENSP00000215375,ENSP00000252102,ENSP00000252711,ENSP00000258975,ENSP00000266544,ENSP00000268379,ENSP00000268668,ENSP00000276689,ENSP00000296684,ENSP00000299518,ENSP00000307786,ENSP00000312618,ENSP00000322450,ENSP00000327070,ENSP00000330737,ENSP00000335304,ENSP00000349142,ENSP00000356972,ENSP00000367923,ENSP00000369134,ENSP00000370223,ENSP00000389649,ENSP00000428895	ACAD9,ATP5C1,ATP5D,ATP5J,COX6C,CYCS,DLD,DLST,IDH3A,IDH3B,MDH2,NDUFA10,NDUFA12,NDUFA2,NDUFA9,NDUFB10,NDUFB4,NDUFB9,NDUFS2,NDUFS4,NDUFV1,PDHA1,SUCLA2,TACO1,UQCRC2
HSA-5368287	Mitochondrial translation	20	94	2.89e-16	ENSP00000081029,ENSP00000177742,ENSP00000199706,ENSP00000254928,ENSP00000258383,ENSP00000258455,ENSP00000260102,ENSP00000272418,ENSP00000296805,ENSP00000301585,ENSP00000305682,ENSP00000308275,ENSP00000308717,ENSP00000308897,ENSP00000313877,ENSP00000315017,ENSP00000323065,ENSP00000341082,ENSP00000370508,ENSP00000431040	ERAL1,GADD45GIP1,GFM2,ICT1,MRPL1,MRPL11,MRPL15,MRPL20,MRPL22,MRPL28,MRPL38,MRPL39,MRPL44,MRPL48,MRPS34,MRPS35,MRPS5,MRPS9,MTIF3,TSFM
HSA-5368286	Mitochondrial translation initiation	18	88	2e-14	ENSP00000081029,ENSP00000177742,ENSP00000199706,ENSP00000254928,ENSP00000258383,ENSP00000258455,ENSP00000260102,ENSP00000272418,ENSP00000301585,ENSP00000305682,ENSP00000308275,ENSP00000308717,ENSP00000308897,ENSP00000315017,ENSP00000323065,ENSP00000341082,ENSP00000370508,ENSP00000431040	ERAL1,GADD45GIP1,ICT1,MRPL1,MRPL11,MRPL15,MRPL20,MRPL22,MRPL28,MRPL38,MRPL39,MRPL44,MRPL48,MRPS34,MRPS35,MRPS5,MRPS9,MTIF3
HSA-5389840	Mitochondrial translation elongation	18	88	2e-14	ENSP00000081029,ENSP00000177742,ENSP00000199706,ENSP00000254928,ENSP00000258383,ENSP00000258455,ENSP00000260102,ENSP00000272418,ENSP00000301585,ENSP00000305682,ENSP00000308275,ENSP00000308717,ENSP00000308897,ENSP00000313877,ENSP00000315017,ENSP00000323065,ENSP00000341082,ENSP00000431040	ERAL1,GADD45GIP1,ICT1,MRPL1,MRPL11,MRPL15,MRPL20,MRPL22,MRPL28,MRPL38,MRPL39,MRPL44,MRPL48,MRPS34,MRPS35,MRPS5,MRPS9,TSFM
HSA-5419276	Mitochondrial translation termination	18	88	2e-14	ENSP00000081029,ENSP00000177742,ENSP00000199706,ENSP00000254928,ENSP00000258383,ENSP00000258455,ENSP00000260102,ENSP00000272418,ENSP00000296805,ENSP00000301585,ENSP00000305682,ENSP00000308275,ENSP00000308717,ENSP00000308897,ENSP00000315017,ENSP00000323065,ENSP00000341082,ENSP00000431040	ERAL1,GADD45GIP1,GFM2,ICT1,MRPL1,MRPL11,MRPL15,MRPL20,MRPL22,MRPL28,MRPL38,MRPL39,MRPL44,MRPL48,MRPS34,MRPS35,MRPS5,MRPS9
HSA-72766	Translation	27	288	2e-14	ENSP00000081029,ENSP00000177742,ENSP00000199706,ENSP00000243253,ENSP00000244571,ENSP00000254928,ENSP00000258383,ENSP00000258455,ENSP00000260102,ENSP00000262213,ENSP00000272418,ENSP00000296805,ENSP00000301585,ENSP00000305682,ENSP00000308275,ENSP00000308717,ENSP00000308897,ENSP00000313877,ENSP00000315017,ENSP00000323065,ENSP00000331901,ENSP00000341082,ENSP00000358060,ENSP00000370508,ENSP00000376056…	AARS2,EEF1B2,EEF1D,EEF1G,ERAL1,GADD45GIP1,GFM2,ICT1,MRPL1,MRPL11,MRPL15,MRPL20,MRPL22,MRPL28,MRPL38,MRPL39,MRPL44,MRPL48,MRPS34,MRPS35,MRPS5,MRPS9,MTIF3,SEC61A1,TARS2,TRAM1,TSFM
HSA-163200	Respiratory electron transport, ATP synthesis by chemiosmotic coupling, and heat production by uncoupling proteins.	18	123	1.55e-12	ENSP00000184266,ENSP00000215375,ENSP00000252102,ENSP00000252711,ENSP00000258975,ENSP00000266544,ENSP00000268379,ENSP00000268668,ENSP00000276689,ENSP00000296684,ENSP00000307786,ENSP00000312618,ENSP00000322450,ENSP00000330737,ENSP00000349142,ENSP00000356972,ENSP00000389649,ENSP00000428895	ACAD9,ATP5C1,ATP5D,ATP5J,COX6C,CYCS,NDUFA10,NDUFA12,NDUFA2,NDUFA9,NDUFB10,NDUFB4,NDUFB9,NDUFS2,NDUFS4,NDUFV1,TACO1,UQCRC2
HSA-611105	Respiratory electron transport	15	100	1.55e-10	ENSP00000184266,ENSP00000252102,ENSP00000252711,ENSP00000258975,ENSP00000266544,ENSP00000268379,ENSP00000268668,ENSP00000276689,ENSP00000296684,ENSP00000307786,ENSP00000312618,ENSP00000322450,ENSP00000330737,ENSP00000356972,ENSP00000428895	ACAD9,COX6C,CYCS,NDUFA10,NDUFA12,NDUFA2,NDUFA9,NDUFB10,NDUFB4,NDUFB9,NDUFS2,NDUFS4,NDUFV1,TACO1,UQCRC2
HSA-1430728	Metabolism	59	2032	3.46e-10	ENSP00000168216,ENSP00000184266,ENSP00000205402,ENSP00000215375,ENSP00000216780,ENSP00000220764,ENSP00000226578,ENSP00000230048,ENSP00000252102,ENSP00000252711,ENSP00000258494,ENSP00000258975,ENSP00000263035,ENSP00000264990,ENSP00000266544,ENSP00000268379,ENSP00000268668,ENSP00000271688,ENSP00000276689,ENSP00000281456,ENSP00000283415,ENSP00000295887,ENSP00000296003,ENSP00000296684,ENSP00000299518…	ACAD11,ACAD9,ACBD5,ACOT13,AK2,AK4,ALDH1L2,ALDH6A1,ATP5C1,ATP5D,ATP5J,BDH1,CDS1,CERS2,COX6C,CYCS,DBT,DECR1,DHTKD1,DLD,DLST,DTYMK,FXN,GPD2,HMGCL,HSD17B10,IDH3A,IDH3B,LPCAT1,MANBA,MDH2,MTHFD2,MTMR1,MTMR14,NADK2,NDUFA10,NDUFA12,NDUFA2,NDUFA9,NDUFB10,NDUFB4,NDUFB9,NDUFS2,NDUFS4,NDUFV1,NUDT19,PCK2,PDHA1,PNPLA8,PRKACA,PYCR1,PYCR2,SGSH,SLC25A17,SLC25A4,SLC25A6,SUCLA2,TACO1,UQCRC2
HSA-6799198	Complex I biogenesis	11	55	7.37e-09	ENSP00000184266,ENSP00000252102,ENSP00000252711,ENSP00000266544,ENSP00000268668,ENSP00000276689,ENSP00000296684,ENSP00000312618,ENSP00000322450,ENSP00000330737,ENSP00000356972	ACAD9,NDUFA10,NDUFA12,NDUFA2,NDUFA9,NDUFB10,NDUFB4,NDUFB9,NDUFS2,NDUFS4,NDUFV1
HSA-71403	Citric acid cycle (TCA cycle)	6	22	2.42e-05	ENSP00000205402,ENSP00000299518,ENSP00000327070,ENSP00000335304,ENSP00000367923,ENSP00000370223	DLD,DLST,IDH3A,IDH3B,MDH2,SUCLA2
HSA-9609507	Protein localization	10	122	8.96e-05	ENSP00000216034,ENSP00000262570,ENSP00000281456,ENSP00000285737,ENSP00000295030,ENSP00000363614,ENSP00000366482,ENSP00000370808,ENSP00000380251,ENSP00000445806	CHCHD3,FXN,HMGCL,LONP2,NUDT19,PEX13,SLC25A4,SLC25A6,TIMM50,TOMM22
HSA-392499	Metabolism of proteins	45	1948	9.19e-05	ENSP00000003084,ENSP00000081029,ENSP00000177742,ENSP00000199706,ENSP00000228506,ENSP00000243253,ENSP00000244571,ENSP00000250498,ENSP00000253023,ENSP00000254928,ENSP00000258383,ENSP00000258455,ENSP00000260102,ENSP00000262213,ENSP00000265564,ENSP00000272418,ENSP00000285737,ENSP00000295030,ENSP00000295633,ENSP00000296805,ENSP00000301585,ENSP00000305682,ENSP00000308275,ENSP00000308717,ENSP00000308897…	AARS2,CFTR,DAD1,EEF1B2,EEF1D,EEF1G,ENSG00000086848,ERAL1,EXOSC7,FSTL1,GADD45GIP1,GFM2,HIST2H2AC,HIST2H2BE,HIST2H2BF,ICT1,LONP2,MLEC,MRPL1,MRPL11,MRPL15,MRPL20,MRPL22,MRPL28,MRPL38,MRPL39,MRPL44,MRPL48,MRPS34,MRPS35,MRPS5,MRPS9,MTIF3,NEGR1,PEX13,SEC61A1,SEL1L,SMC6,SUZ12,TARS2,TRAM1,TSFM,UBE2M,VDAC2,VIMP
HSA-71406	Pyruvate metabolism and Citric Acid (TCA) cycle	7	54	0.00017	ENSP00000205402,ENSP00000299518,ENSP00000327070,ENSP00000335304,ENSP00000367923,ENSP00000369134,ENSP00000370223	DLD,DLST,IDH3A,IDH3B,MDH2,PDHA1,SUCLA2
HSA-389661	Glyoxylate metabolism and glycine degradation	5	31	0.0015	ENSP00000205402,ENSP00000263035,ENSP00000335304,ENSP00000359151,ENSP00000369134	DBT,DHTKD1,DLD,DLST,PDHA1
HSA-1268020	Mitochondrial protein import	6	64	0.0037	ENSP00000216034,ENSP00000262570,ENSP00000281456,ENSP00000366482,ENSP00000370808,ENSP00000445806	CHCHD3,FXN,SLC25A4,SLC25A6,TIMM50,TOMM22
HSA-1592230	Mitochondrial biogenesis	7	92	0.0037	ENSP00000215375,ENSP00000262570,ENSP00000307786,ENSP00000349142,ENSP00000356134,ENSP00000389649,ENSP00000420588	ATP5C1,ATP5D,ATP5J,CHCHD3,CYCS,TFAM,TFB1M
HSA-212300	PRC2 methylates histones and DNA	5	42	0.0047	ENSP00000263360,ENSP00000308405,ENSP00000316578,ENSP00000332194,ENSP00000358151	EED,H2AFV,HIST2H2AC,HIST2H2BE,SUZ12
HSA-70895	Branched-chain amino acid catabolism	4	23	0.0056	ENSP00000168216,ENSP00000205402,ENSP00000359151,ENSP00000450436	ALDH6A1,DBT,DLD,HSD17B10
HSA-212165	Epigenetic regulation of gene expression	7	115	0.0106	ENSP00000263360,ENSP00000308405,ENSP00000316578,ENSP00000332194,ENSP00000342434,ENSP00000353463,ENSP00000358151	BAZ1B,EED,GATAD2A,H2AFV,HIST2H2AC,HIST2H2BE,SUZ12
HSA-8949613	Cristae formation	4	31	0.0141	ENSP00000215375,ENSP00000262570,ENSP00000349142,ENSP00000389649	ATP5C1,ATP5D,ATP5J,CHCHD3
HSA-2559586	DNA Damage/Telomere Stress Induced Senescence	5	61	0.0189	ENSP00000307705,ENSP00000308405,ENSP00000332194,ENSP00000358151,ENSP00000399888	H2AFV,HIST1H1E,HIST2H2AC,HIST2H2BE,HMGA1
HSA-180897	Vpr-mediated induction of apoptosis by mitochondrial outer membrane permeabilization	2	3	0.0266	ENSP00000281456,ENSP00000370808	SLC25A4,SLC25A6
HSA-163210	Formation of ATP by chemiosmotic coupling	3	18	0.0327	ENSP00000215375,ENSP00000349142,ENSP00000389649	ATP5C1,ATP5D,ATP5J
HSA-3247509	Chromatin modifying enzymes	9	238	0.0353	ENSP00000263360,ENSP00000308405,ENSP00000316578,ENSP00000323967,ENSP00000332194,ENSP00000353463,ENSP00000358151,ENSP00000361363,ENSP00000445831	DMAP1,EED,GATAD2A,H2AFV,HIST2H2AC,HIST2H2BE,HIST2H2BF,SMARCE1,SUZ12
HSA-5250913	Positive epigenetic regulation of rRNA expression	5	73	0.0353	ENSP00000308405,ENSP00000332194,ENSP00000342434,ENSP00000353463,ENSP00000358151	BAZ1B,GATAD2A,H2AFV,HIST2H2AC,HIST2H2BE
HSA-1912422	Pre-NOTCH Expression and Processing	5	77	0.0381	ENSP00000277541,ENSP00000308405,ENSP00000332194,ENSP00000337053,ENSP00000358151	H2AFV,HIST2H2AC,HIST2H2BE,NOTCH1,SEL1L
HSA-427389	ERCC6 (CSB) and EHMT2 (G9a) positively regulate rRNA expression	4	45	0.0381	ENSP00000308405,ENSP00000332194,ENSP00000353463,ENSP00000358151	GATAD2A,H2AFV,HIST2H2AC,HIST2H2BE
HSA-2559583	Cellular Senescence	7	161	0.0457	ENSP00000263360,ENSP00000307705,ENSP00000308405,ENSP00000316578,ENSP00000332194,ENSP00000358151,ENSP00000399888	EED,H2AFV,HIST1H1E,HIST2H2AC,HIST2H2BE,HMGA1,SUZ12
HSA-390918	Peroxisomal lipid metabolism	3	23	0.0475	ENSP00000379568,ENSP00000380251,ENSP00000390722	ACBD5,NUDT19,SLC25A17
